# Supplementary material
Source: PubMed Central journal article supplement (PMC7594398)

Supplemental - Flow Cytometric Analysis  
Supplement to Manuscript

**Delineation of target expression profiles in CD34<sup>+</sup>/CD38<sup>-</sup> and CD34<sup>+</sup>/CD38<sup>+</sup> stem- and progenitor cells in acute (AML) and chronic (CML) myeloid leukemia**

This additional supplement shows the flow cytometric analysis of 75 markers and their expression profiles on CD34<sup>+</sup>/CD38<sup>-</sup> stem cells (blue boxes) and CD34<sup>+</sup>/CD38<sup>+</sup> progenitor cells (grey boxes) in normal bone marrow (nBM), patients with acute myeloid leukemia (AML) or chronic myeloid leukemia (CML) (both at diagnosis and relapse), myelodysplastic syndrome (MDS), cord blood (CB), idiopathic cytopenia of undetermined significance (ICUS), lymphoma BM, MDS/myeloproliferative neoplasm (MDS/MPN) and AML or CML in complete hematologic remission (CHR). Samples were examined by multi-color flow cytometry using antibodies shown in Table S1. The figures show the staining ratio compared to an unspecific isotype control antibody (staining index) and the percentage of reactive cells in each sample. The dotted line represents clear expression (staining index is higher than 3 or more than 20% positive cells). The range of each box represents the 25<sup>th</sup> (lower box margin) to 75<sup>th</sup> (upper box margin) percentile. The middle lines inside the boxes represent the median expression level. Each dot represents an individual patient.

Cell fraction  CD34+/CD38-  CD34+/CD38+

# CD9 staining index

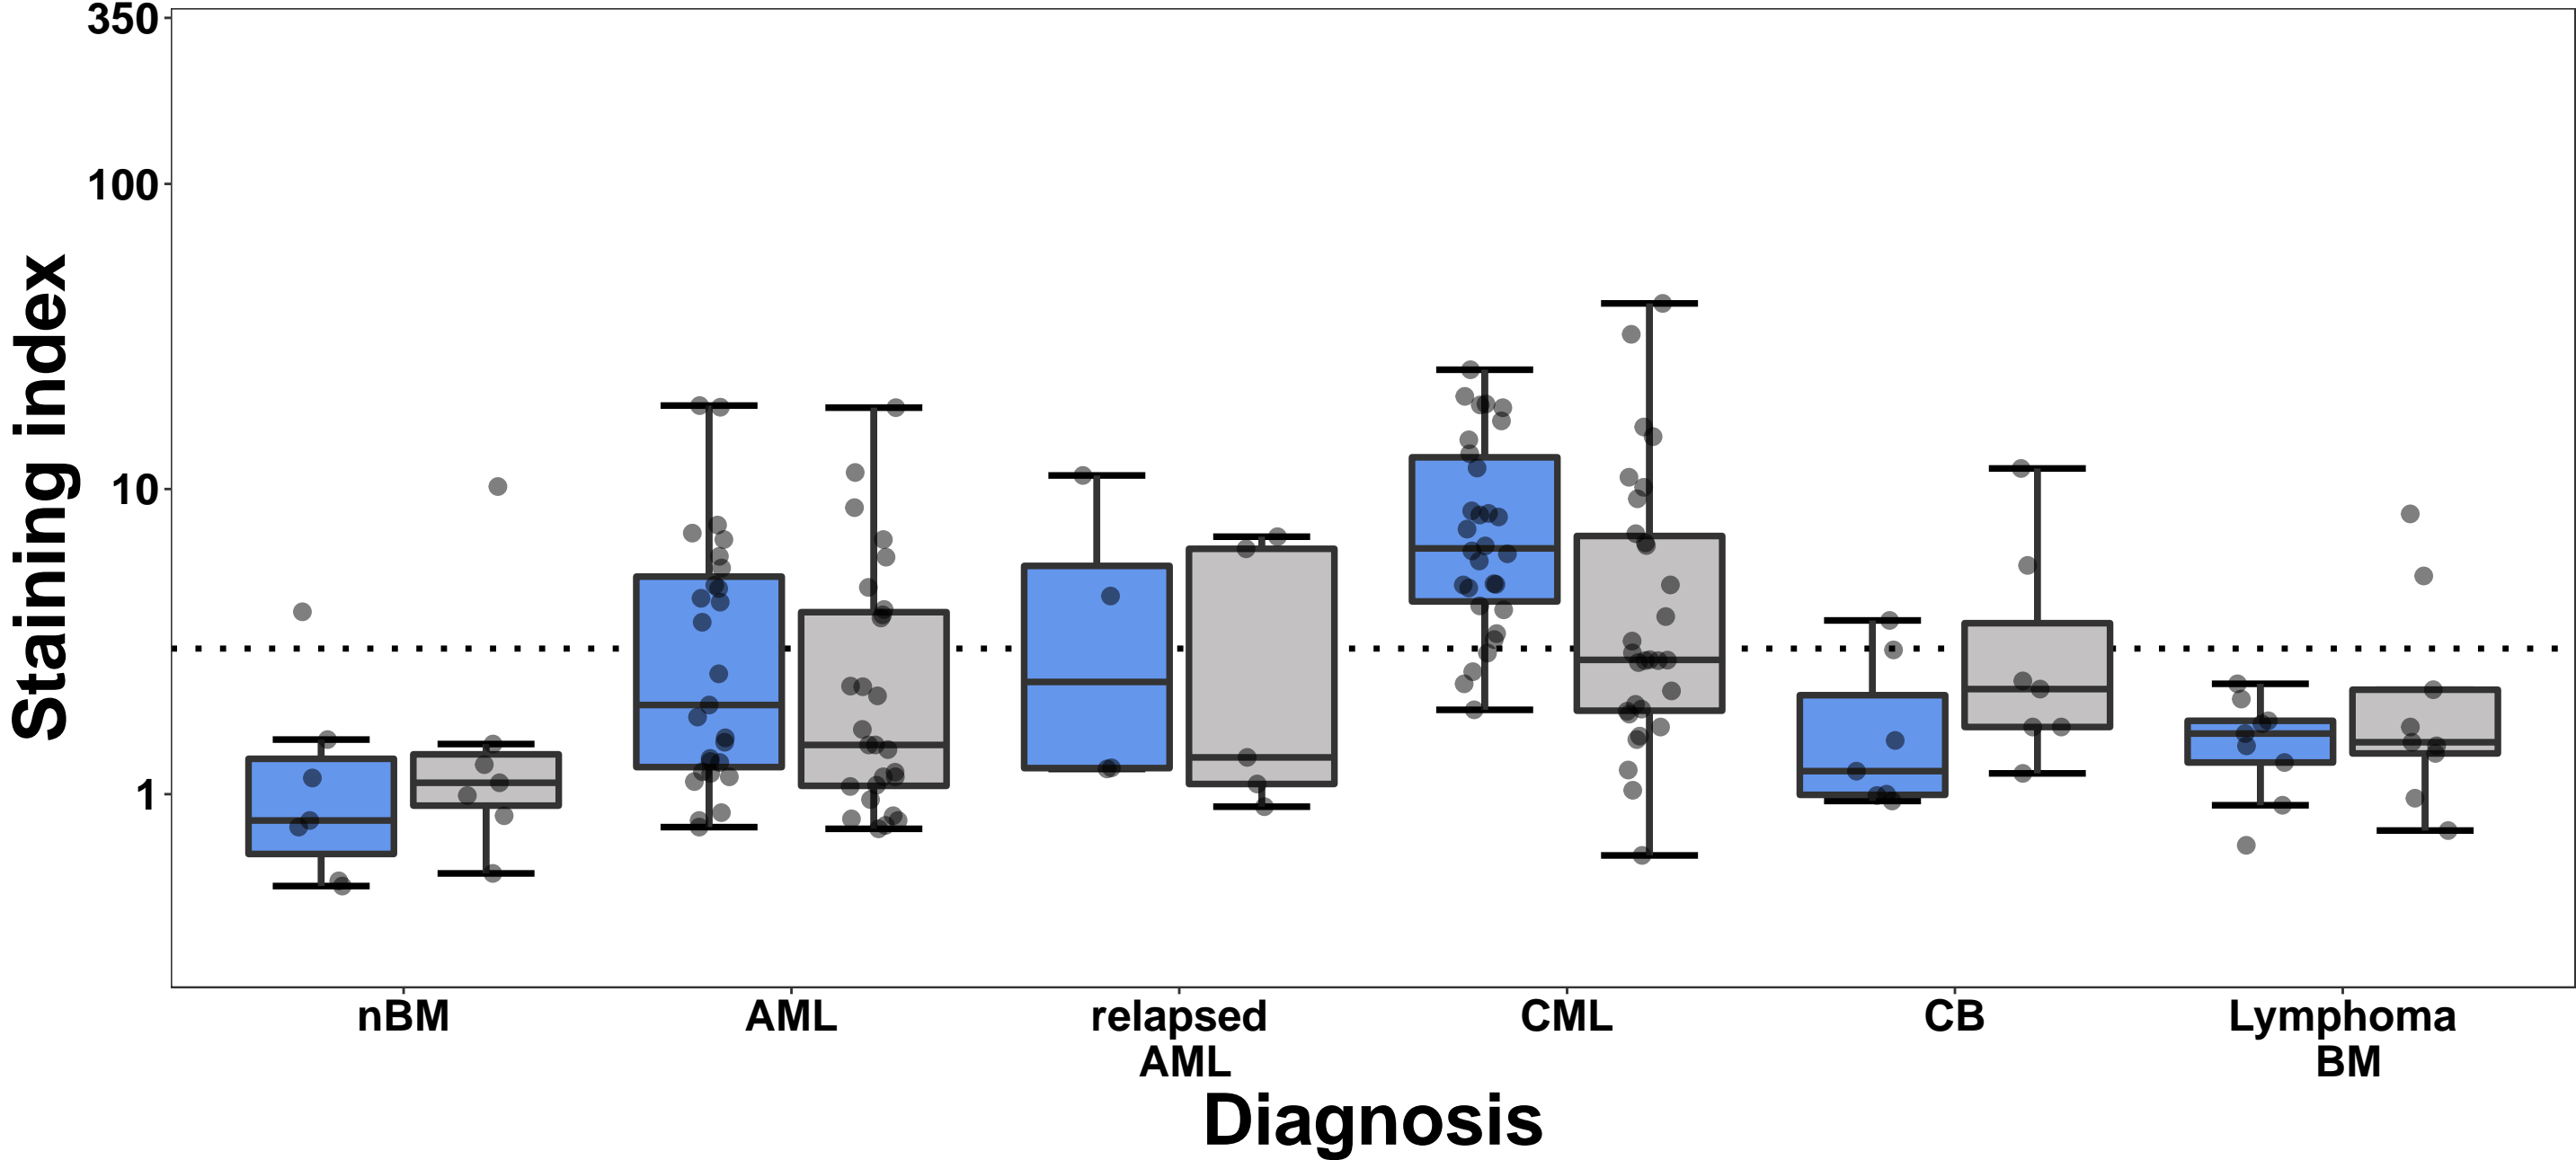

Cell fraction  CD34+/CD38-  CD34+/CD38+

# CD9 percentage

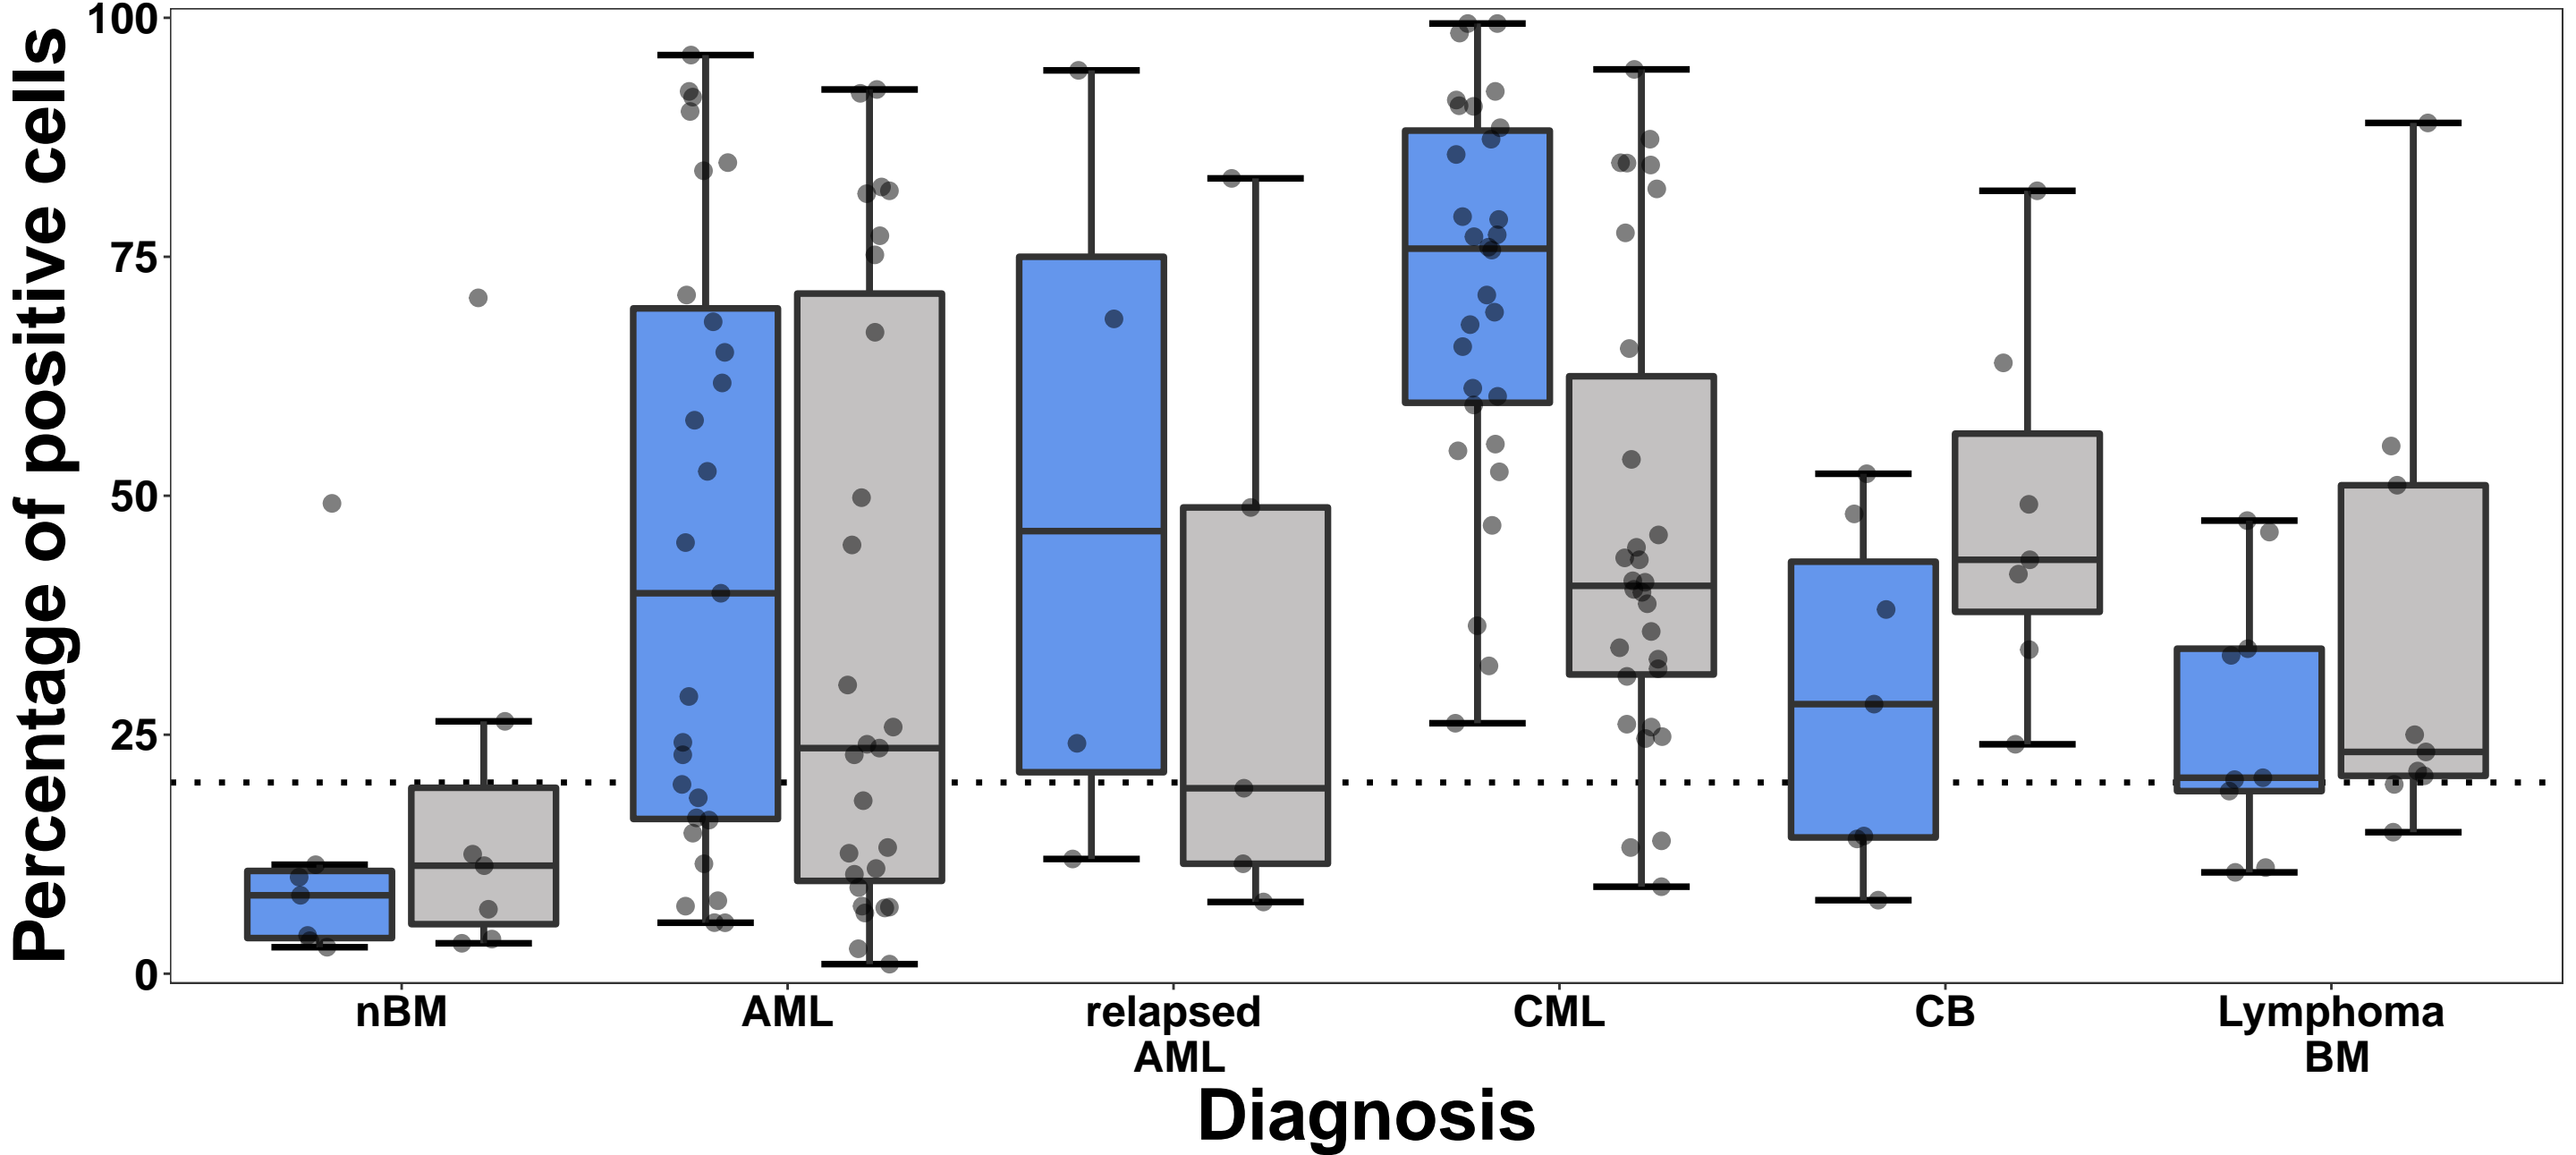

Cell fraction  CD34+/CD38-  CD34+/CD38+

# CD11a staining index

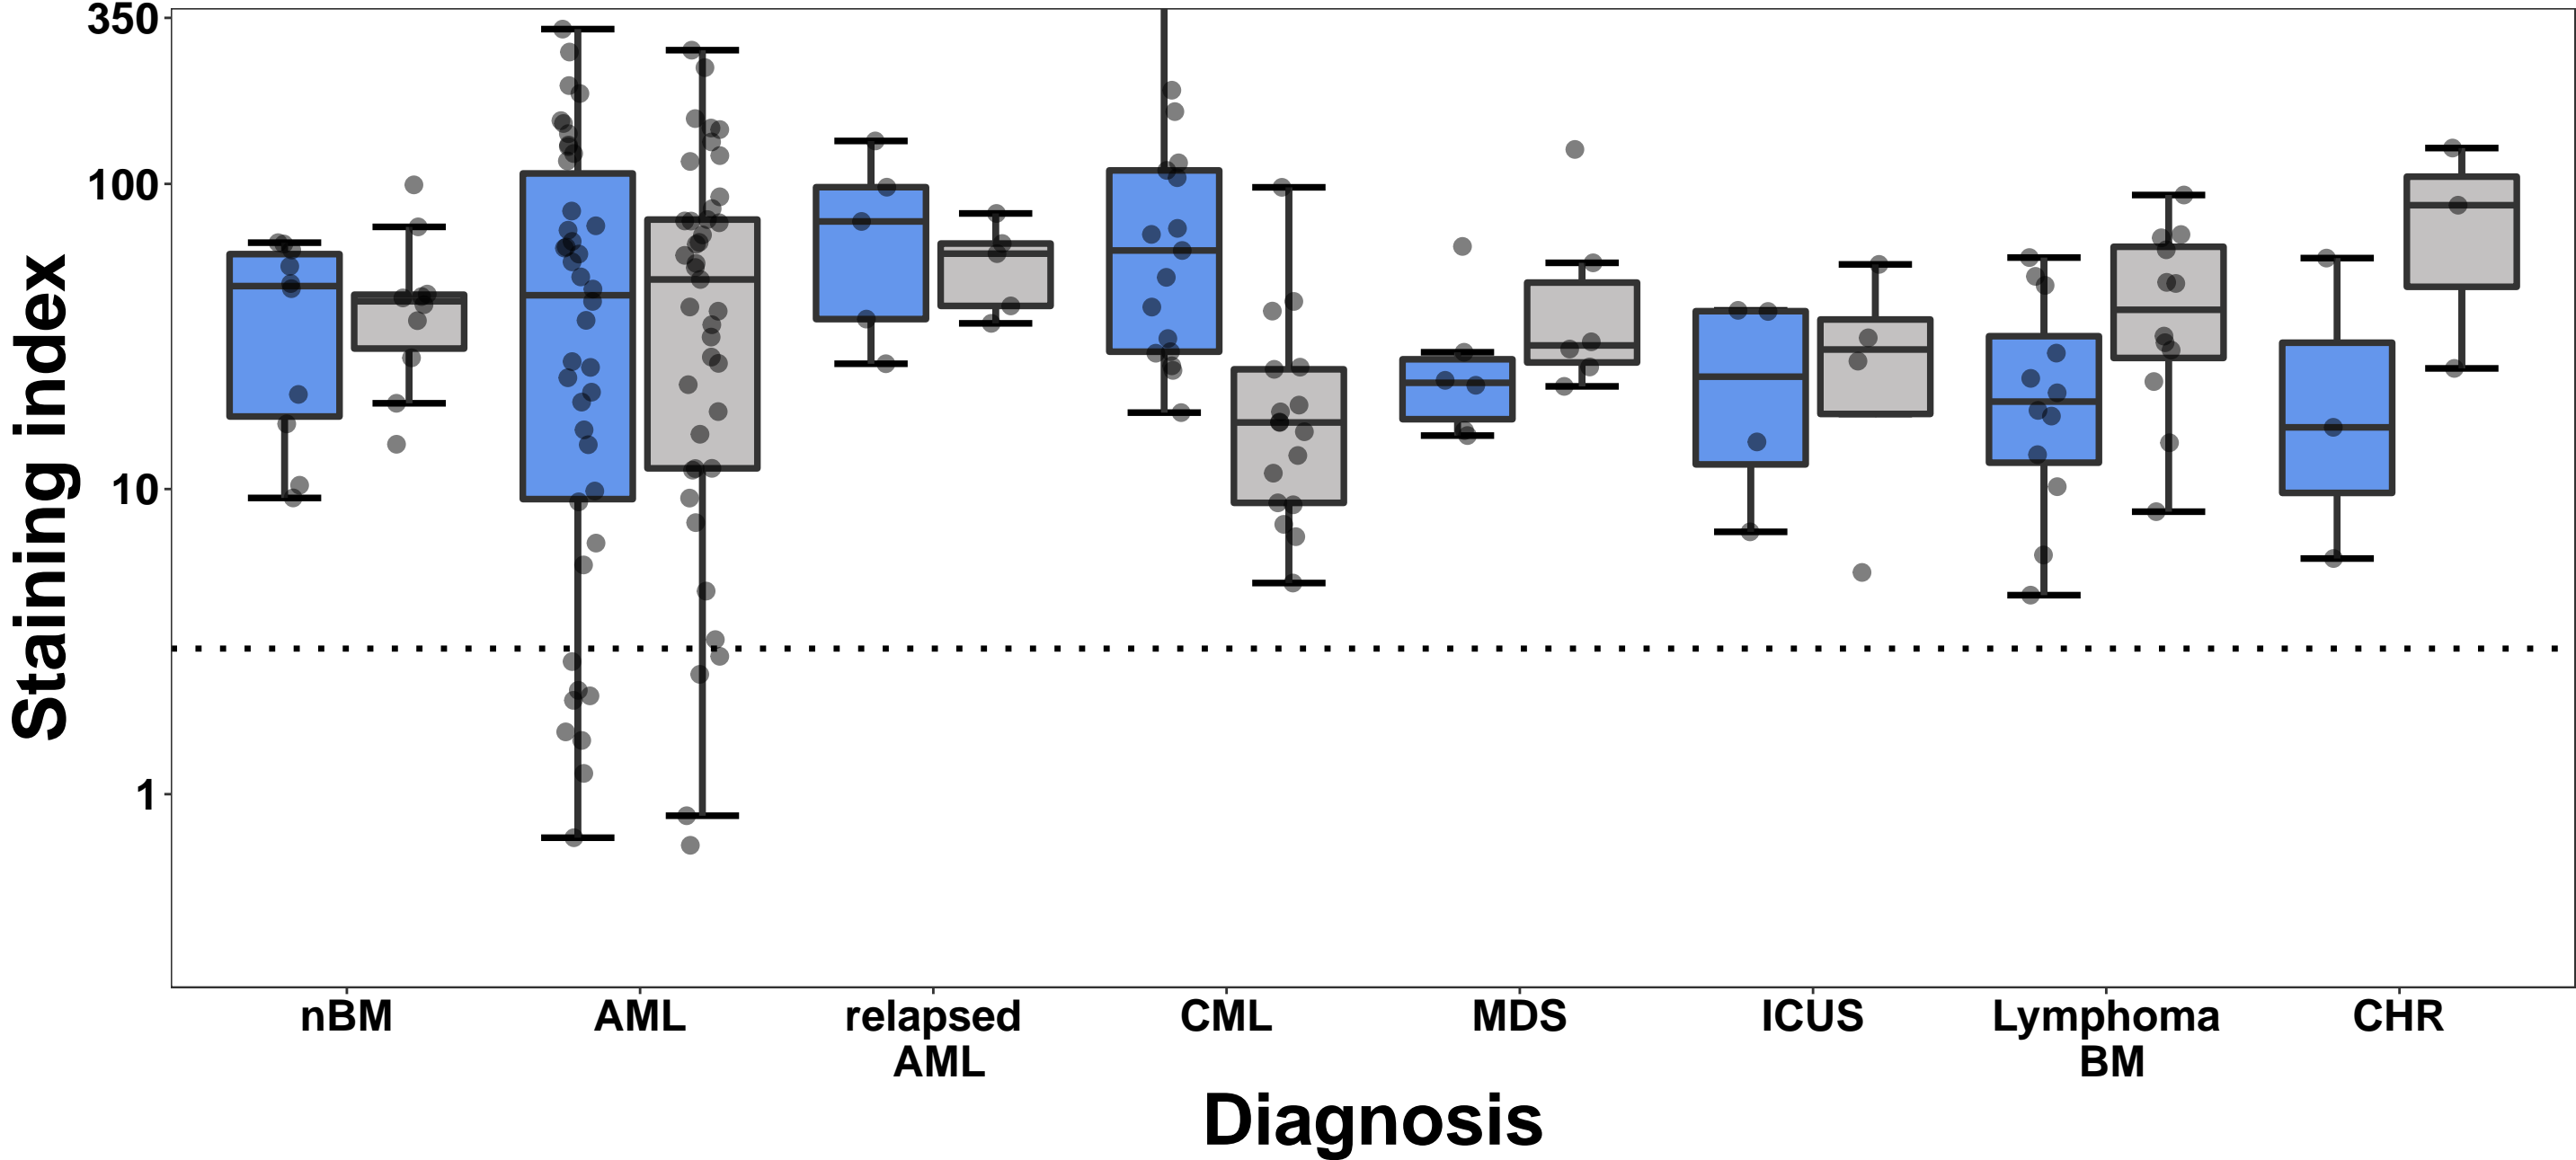

Cell fraction  CD34+/CD38-  CD34+/CD38+

# CD11a percentage

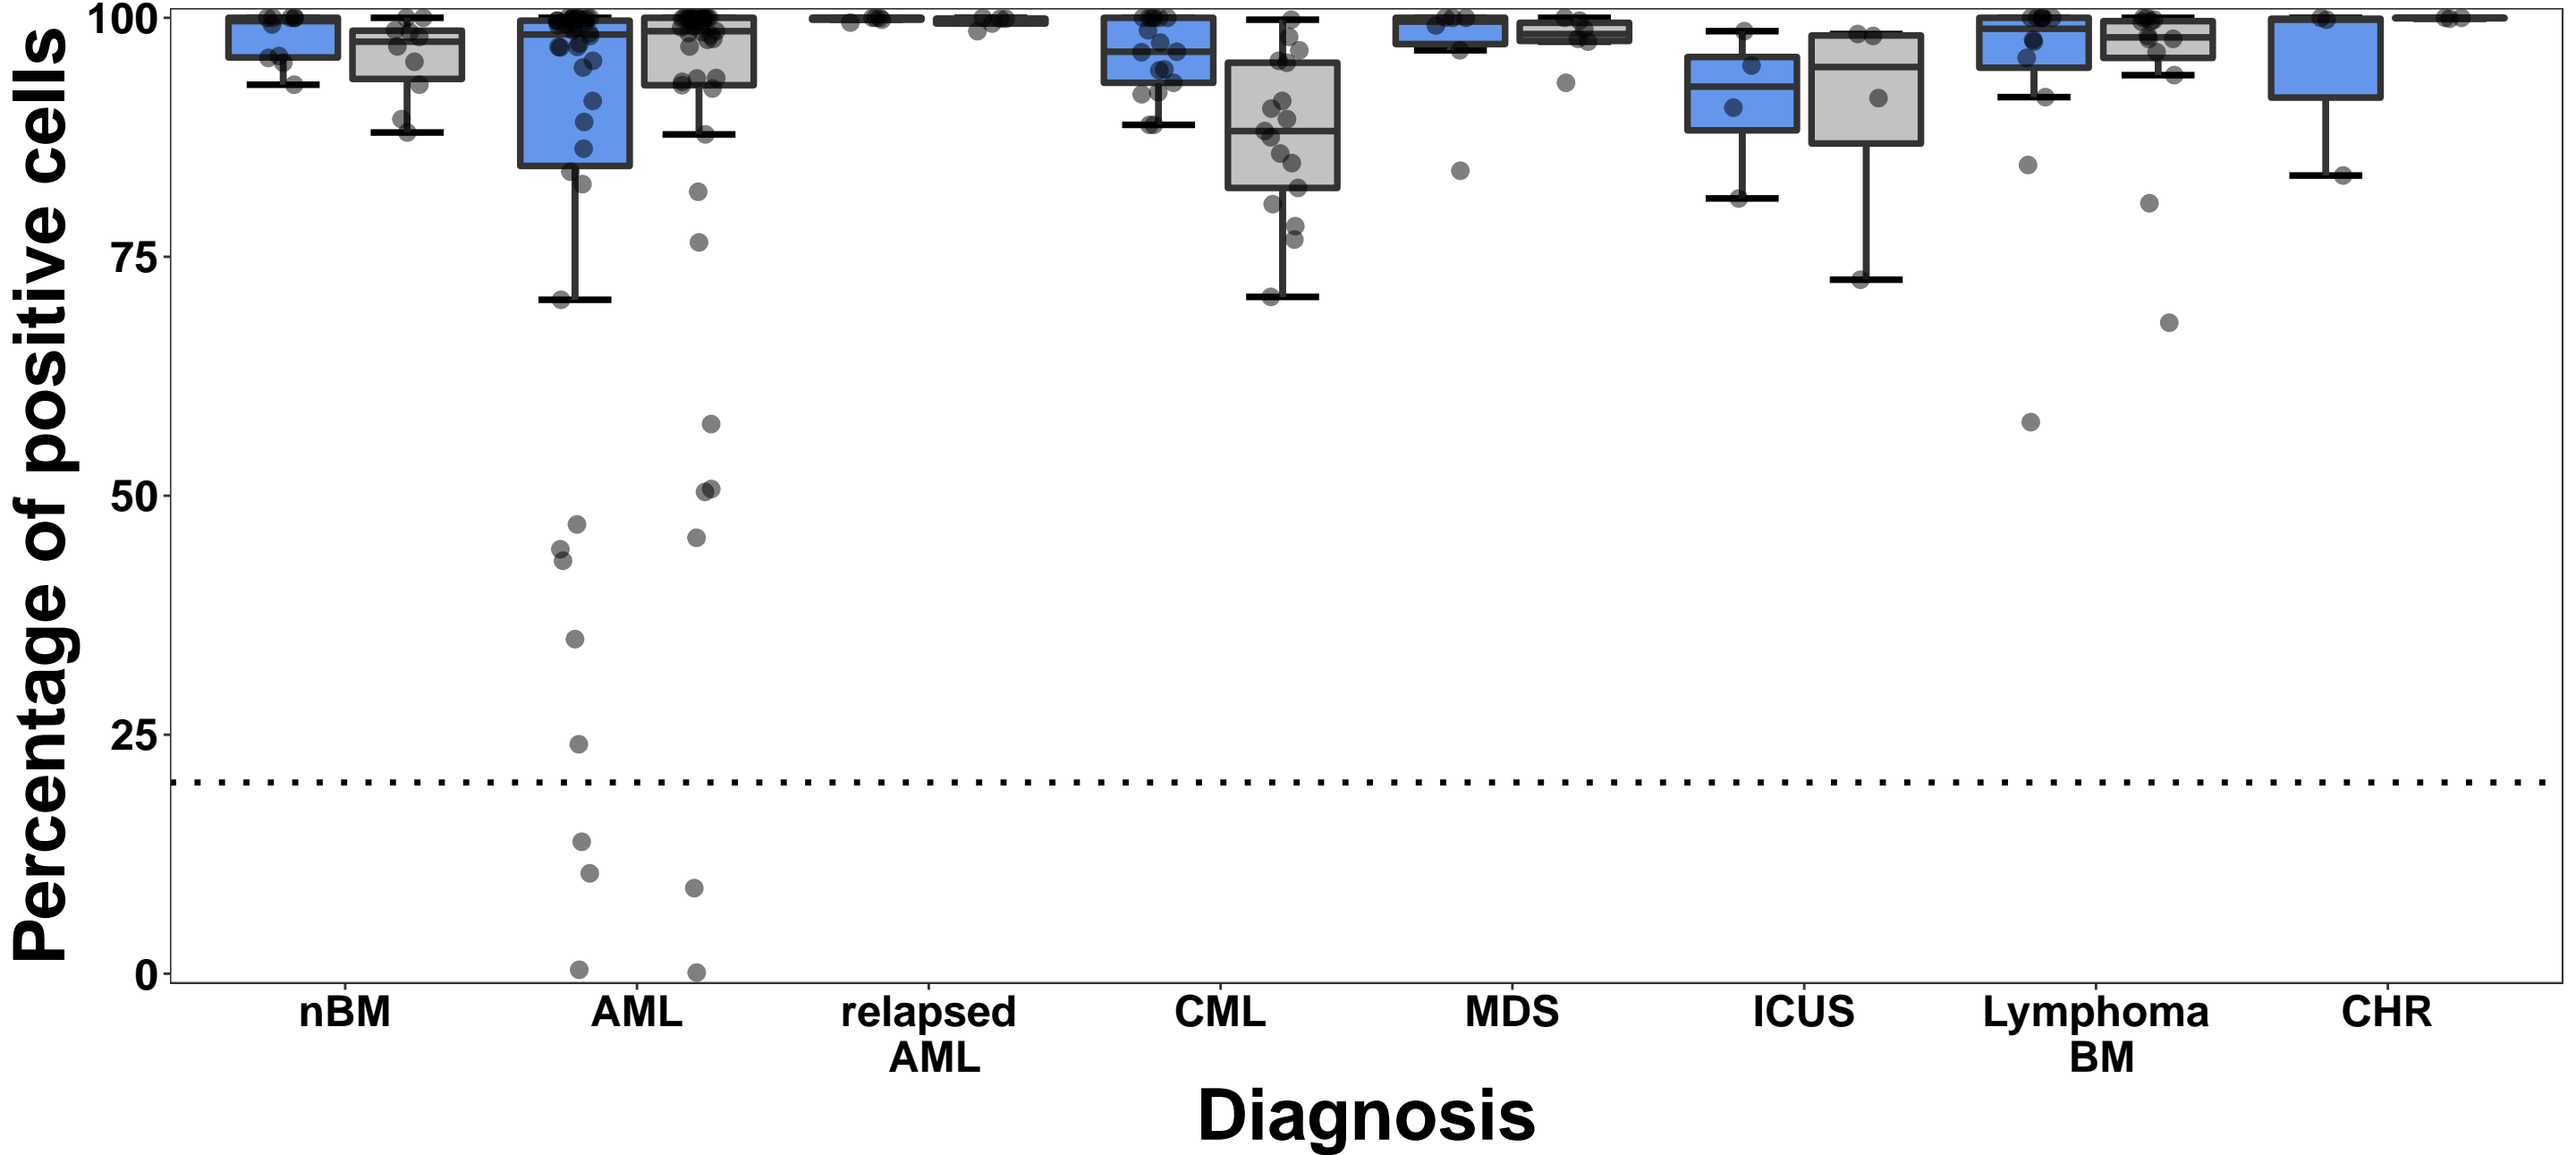

# CD13 staining index

Cell fraction  CD34+/CD38-  CD34+/CD38+

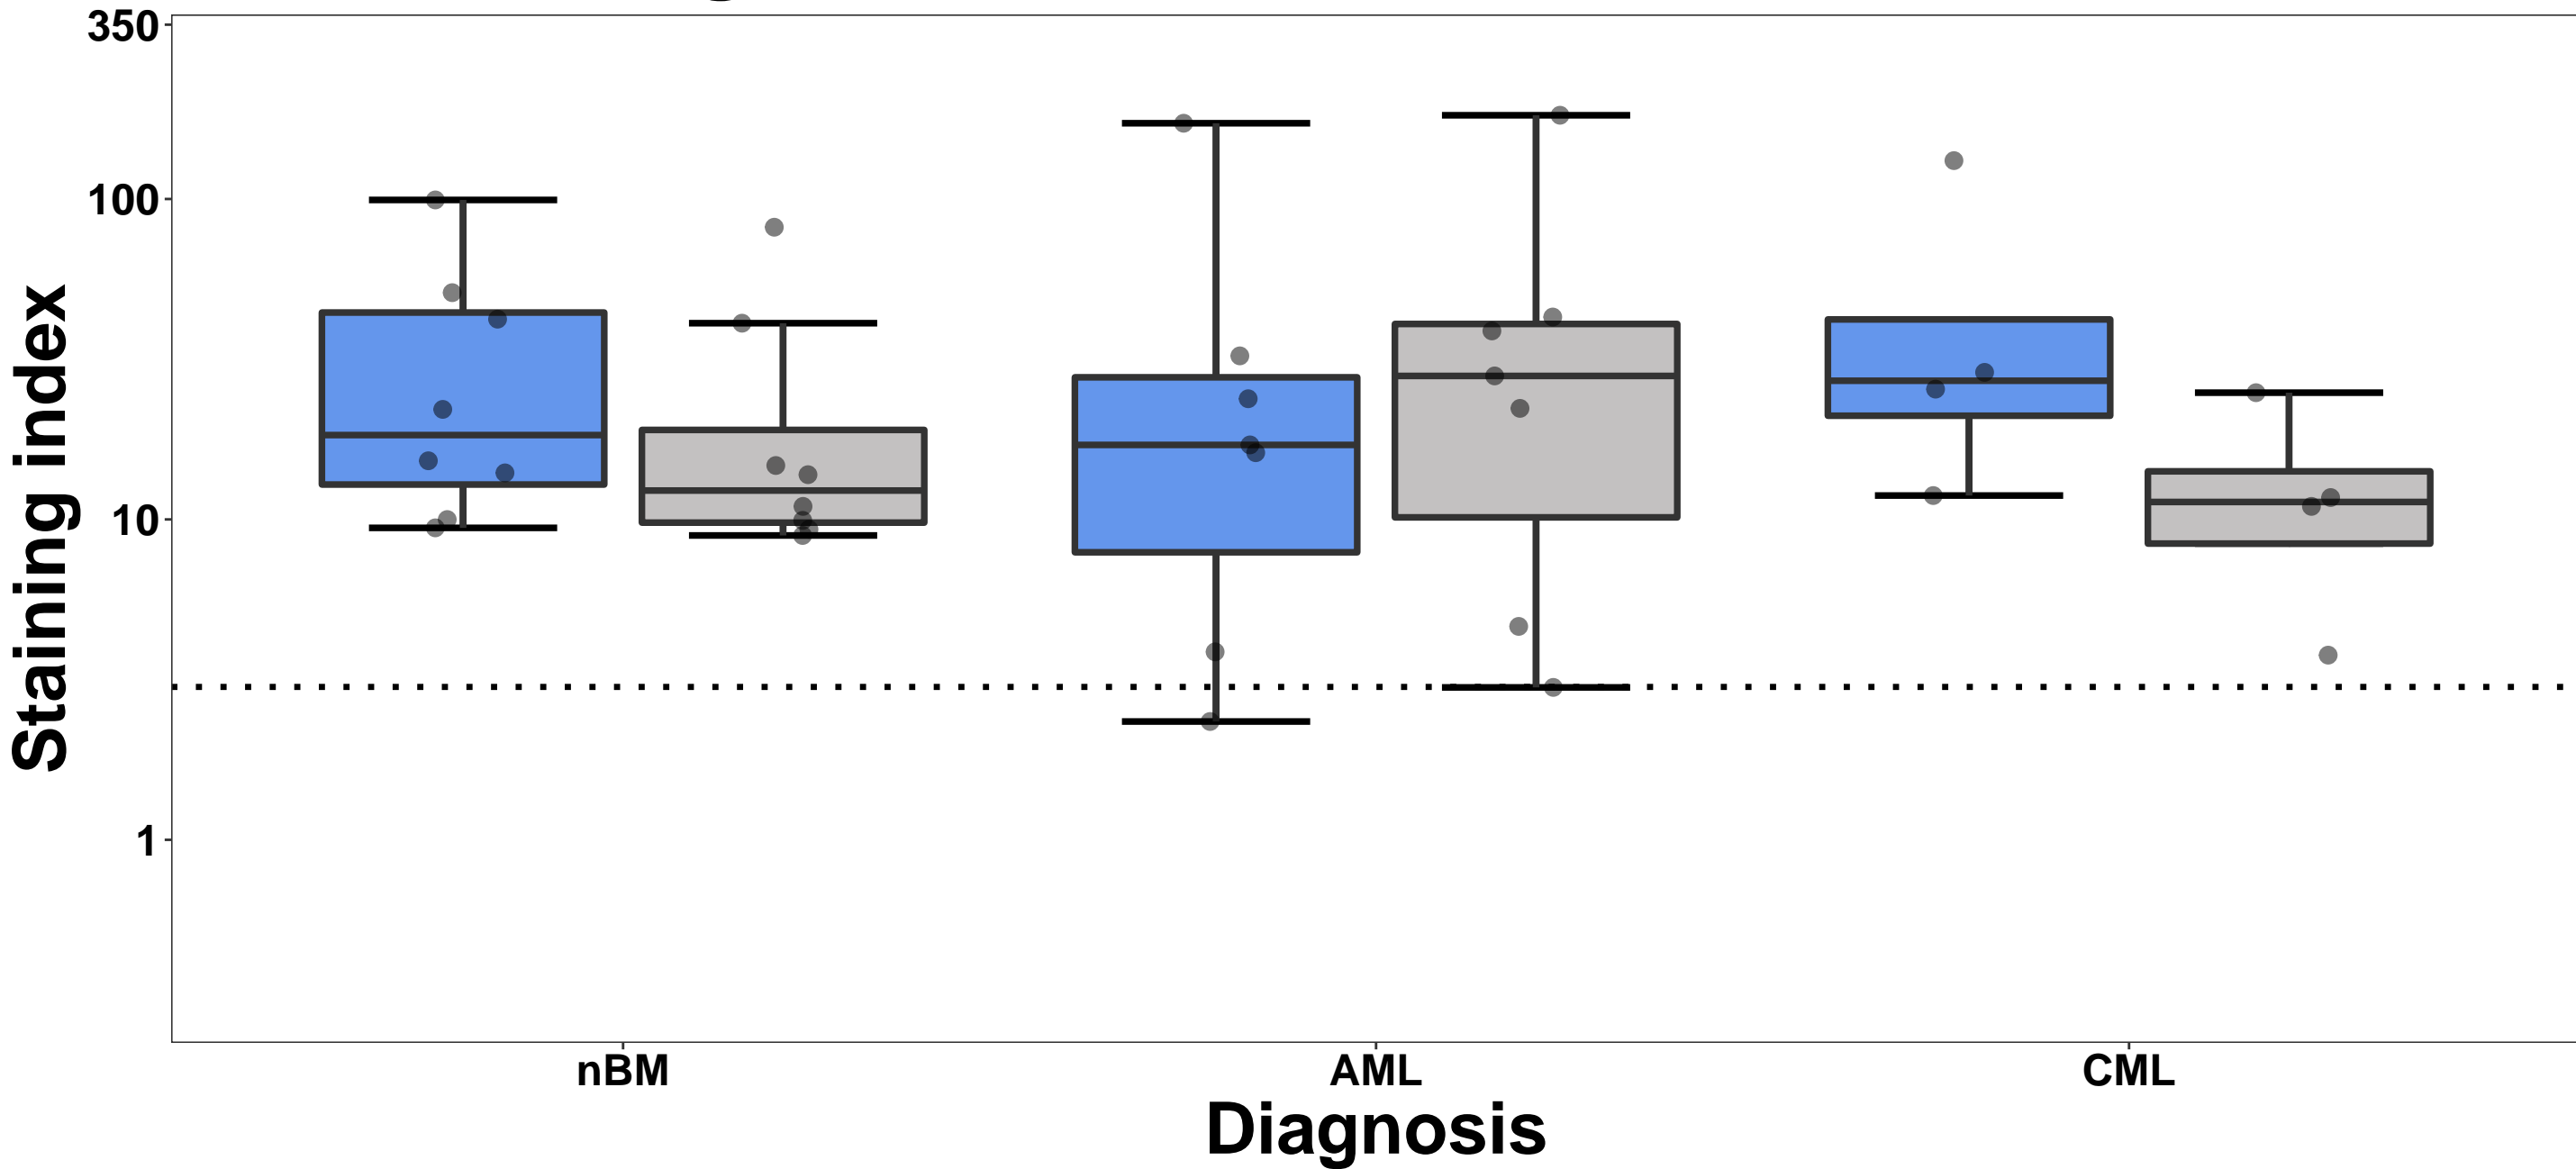

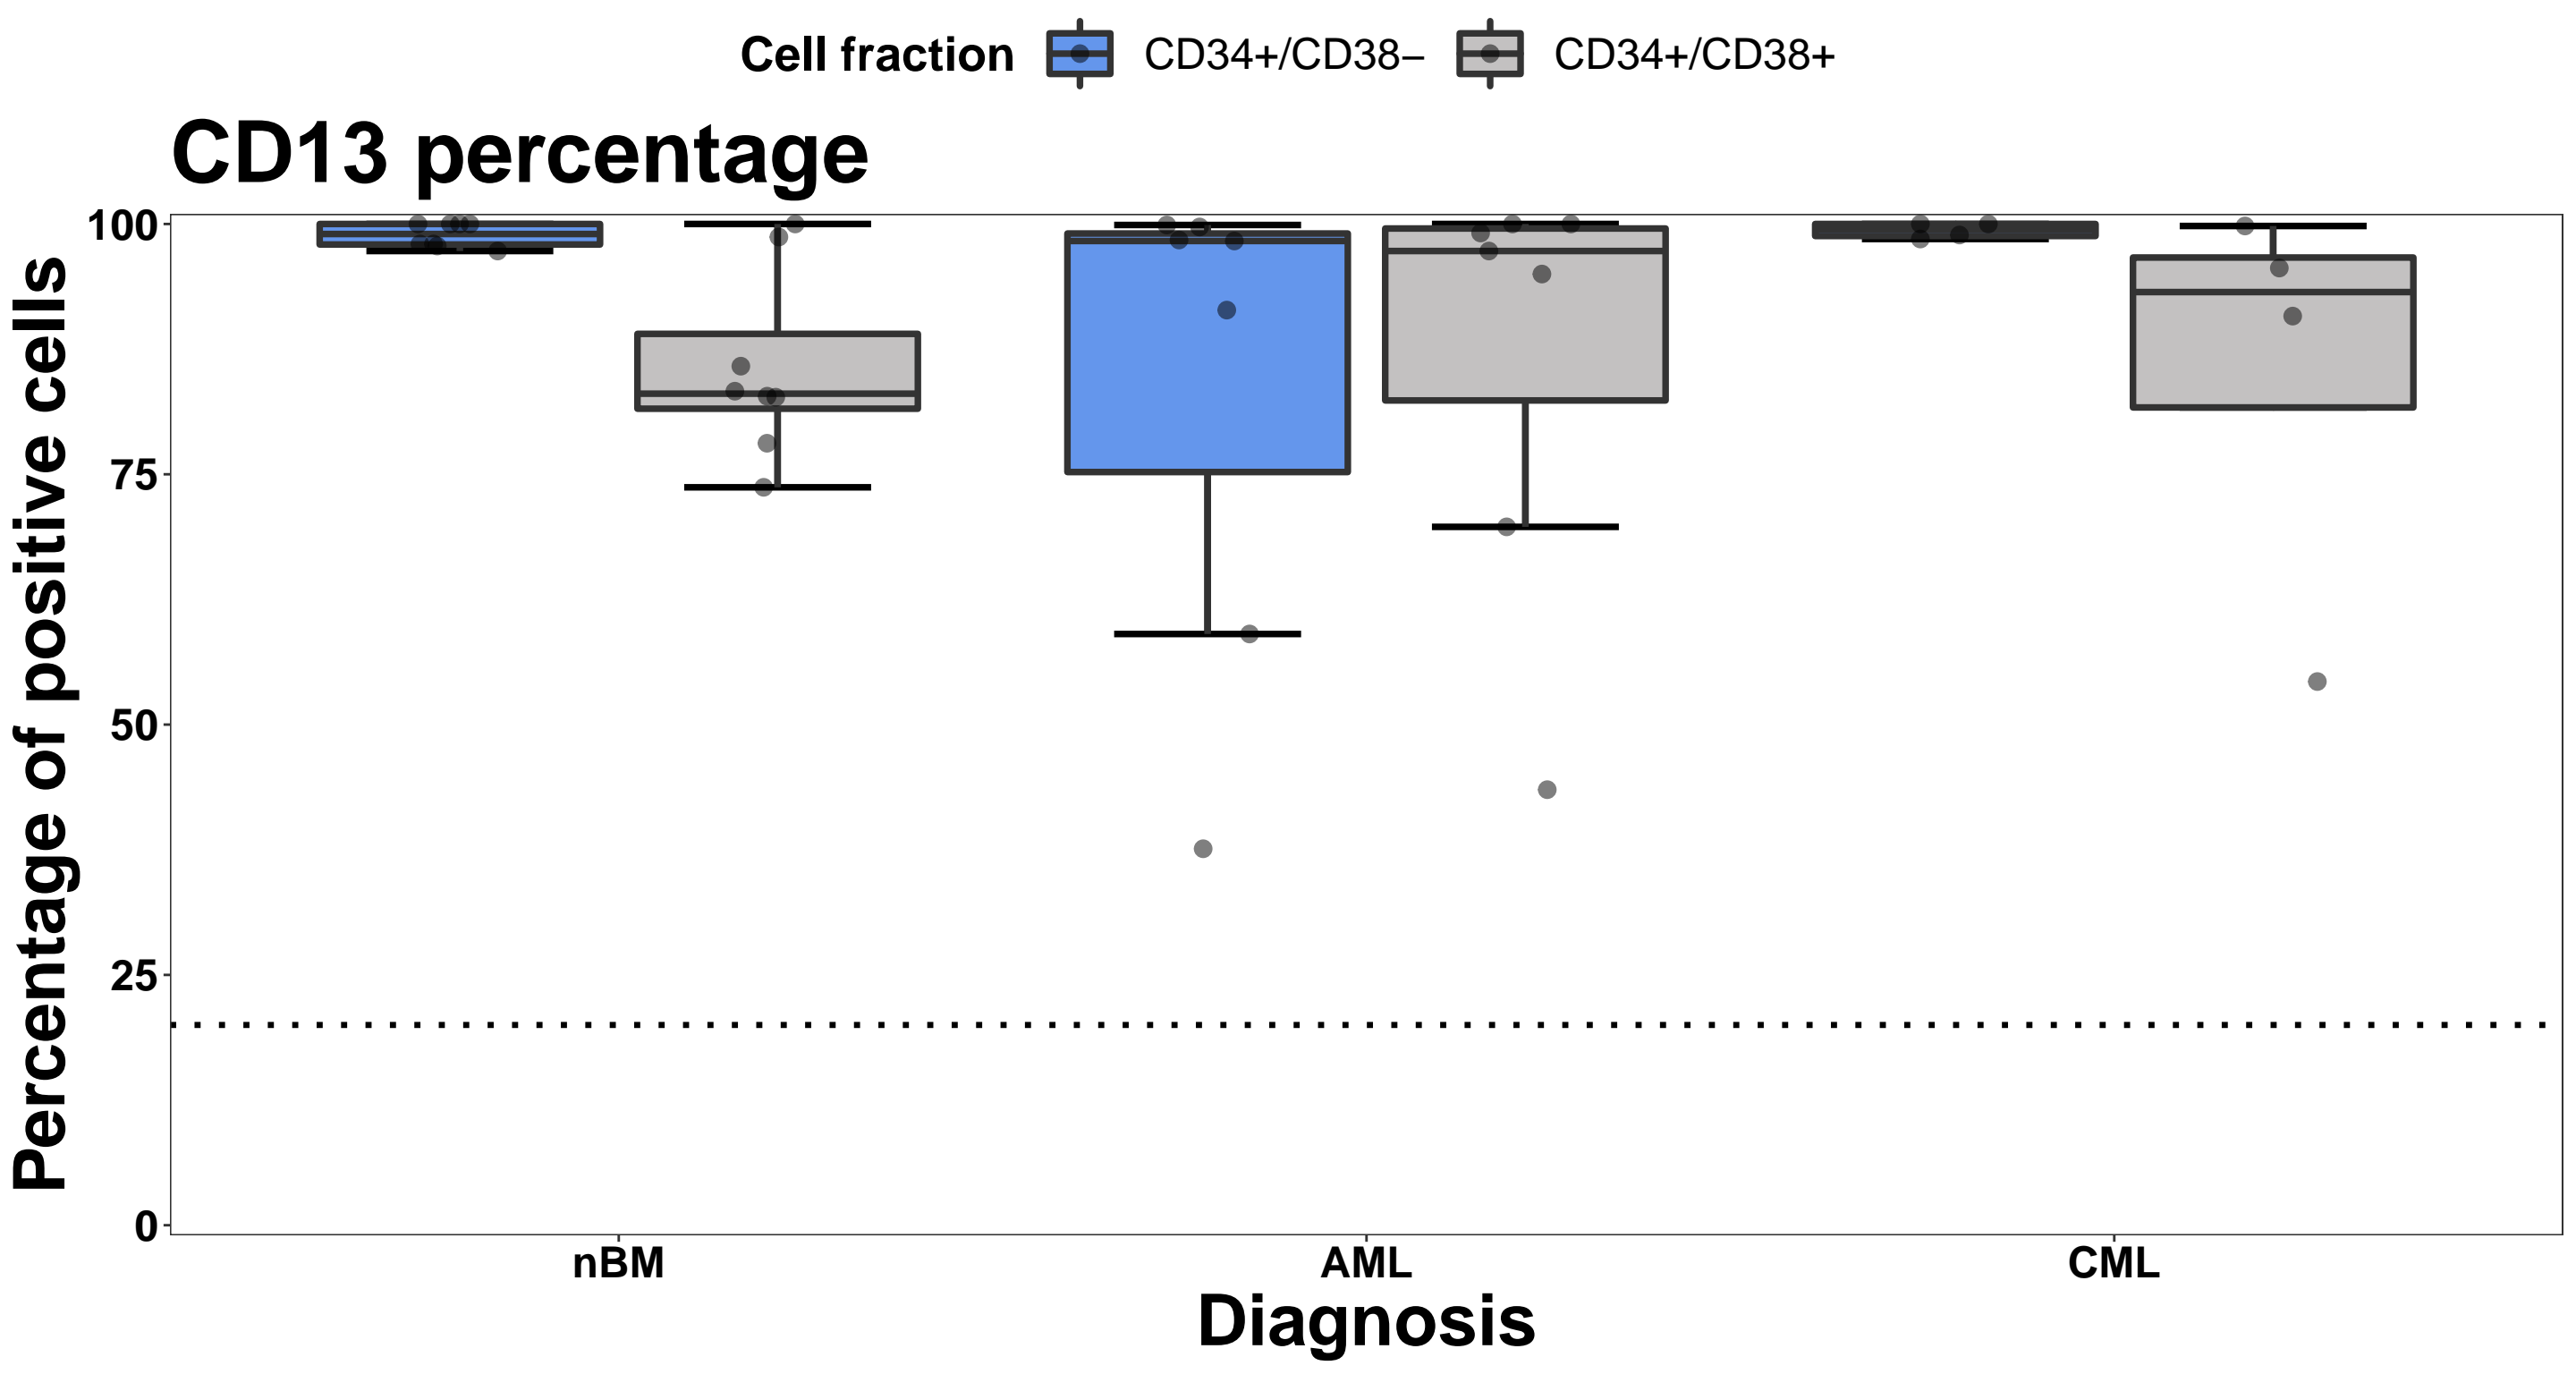

Cell fraction  CD34+/CD38-  CD34+/CD38+

# CD18 staining index

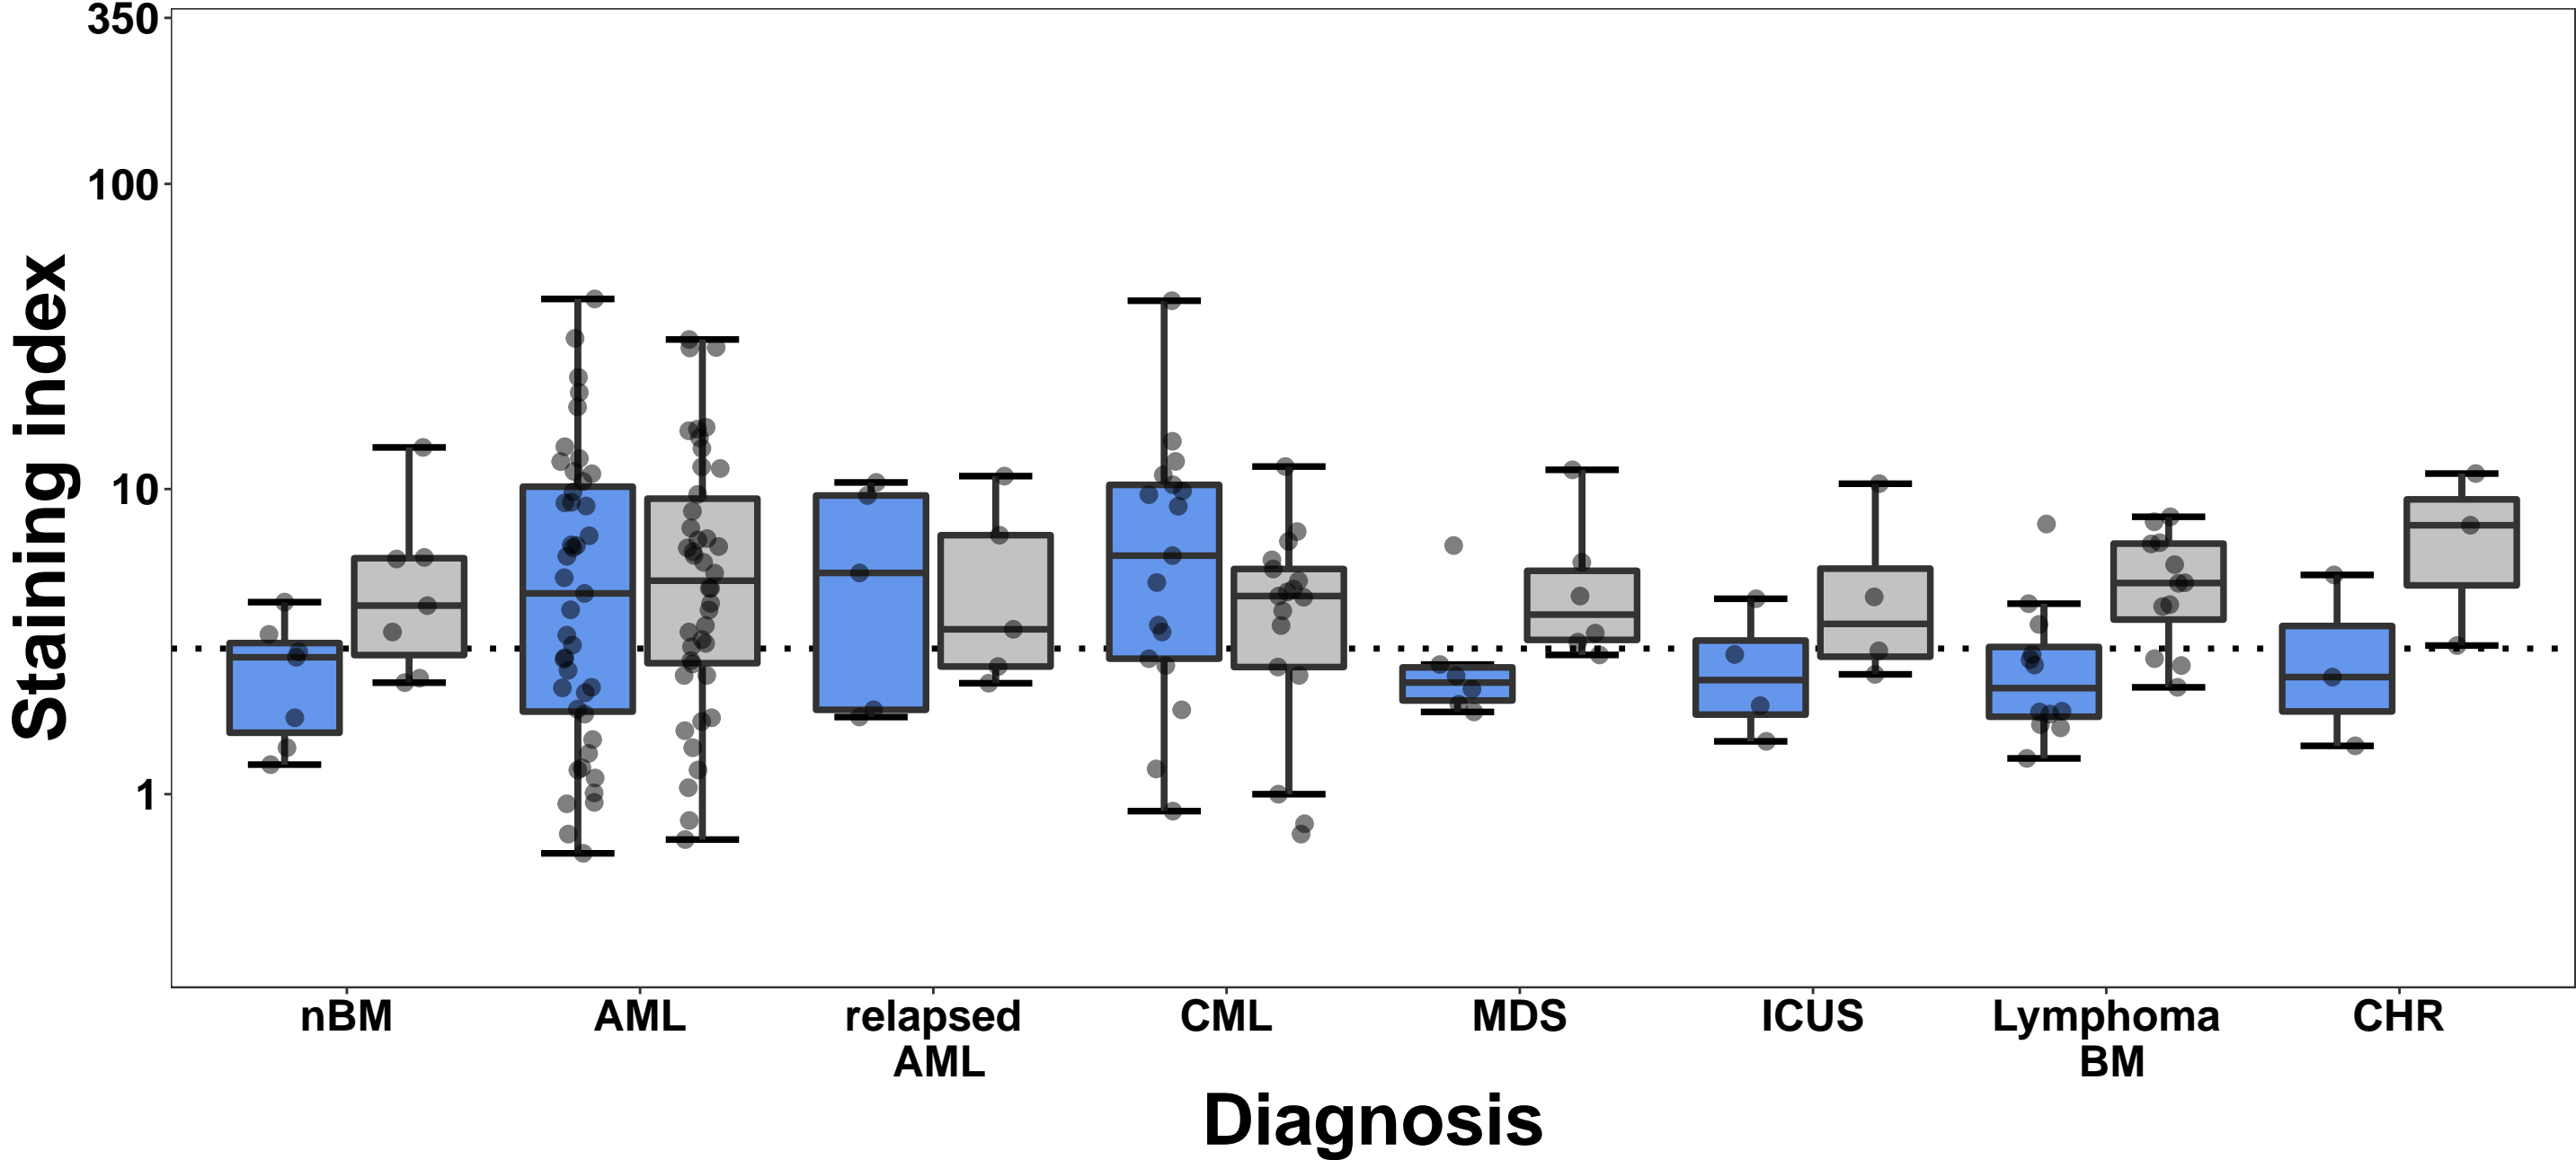



Cell fraction  CD34+/CD38-  CD34+/CD38+

# CD18 percentage

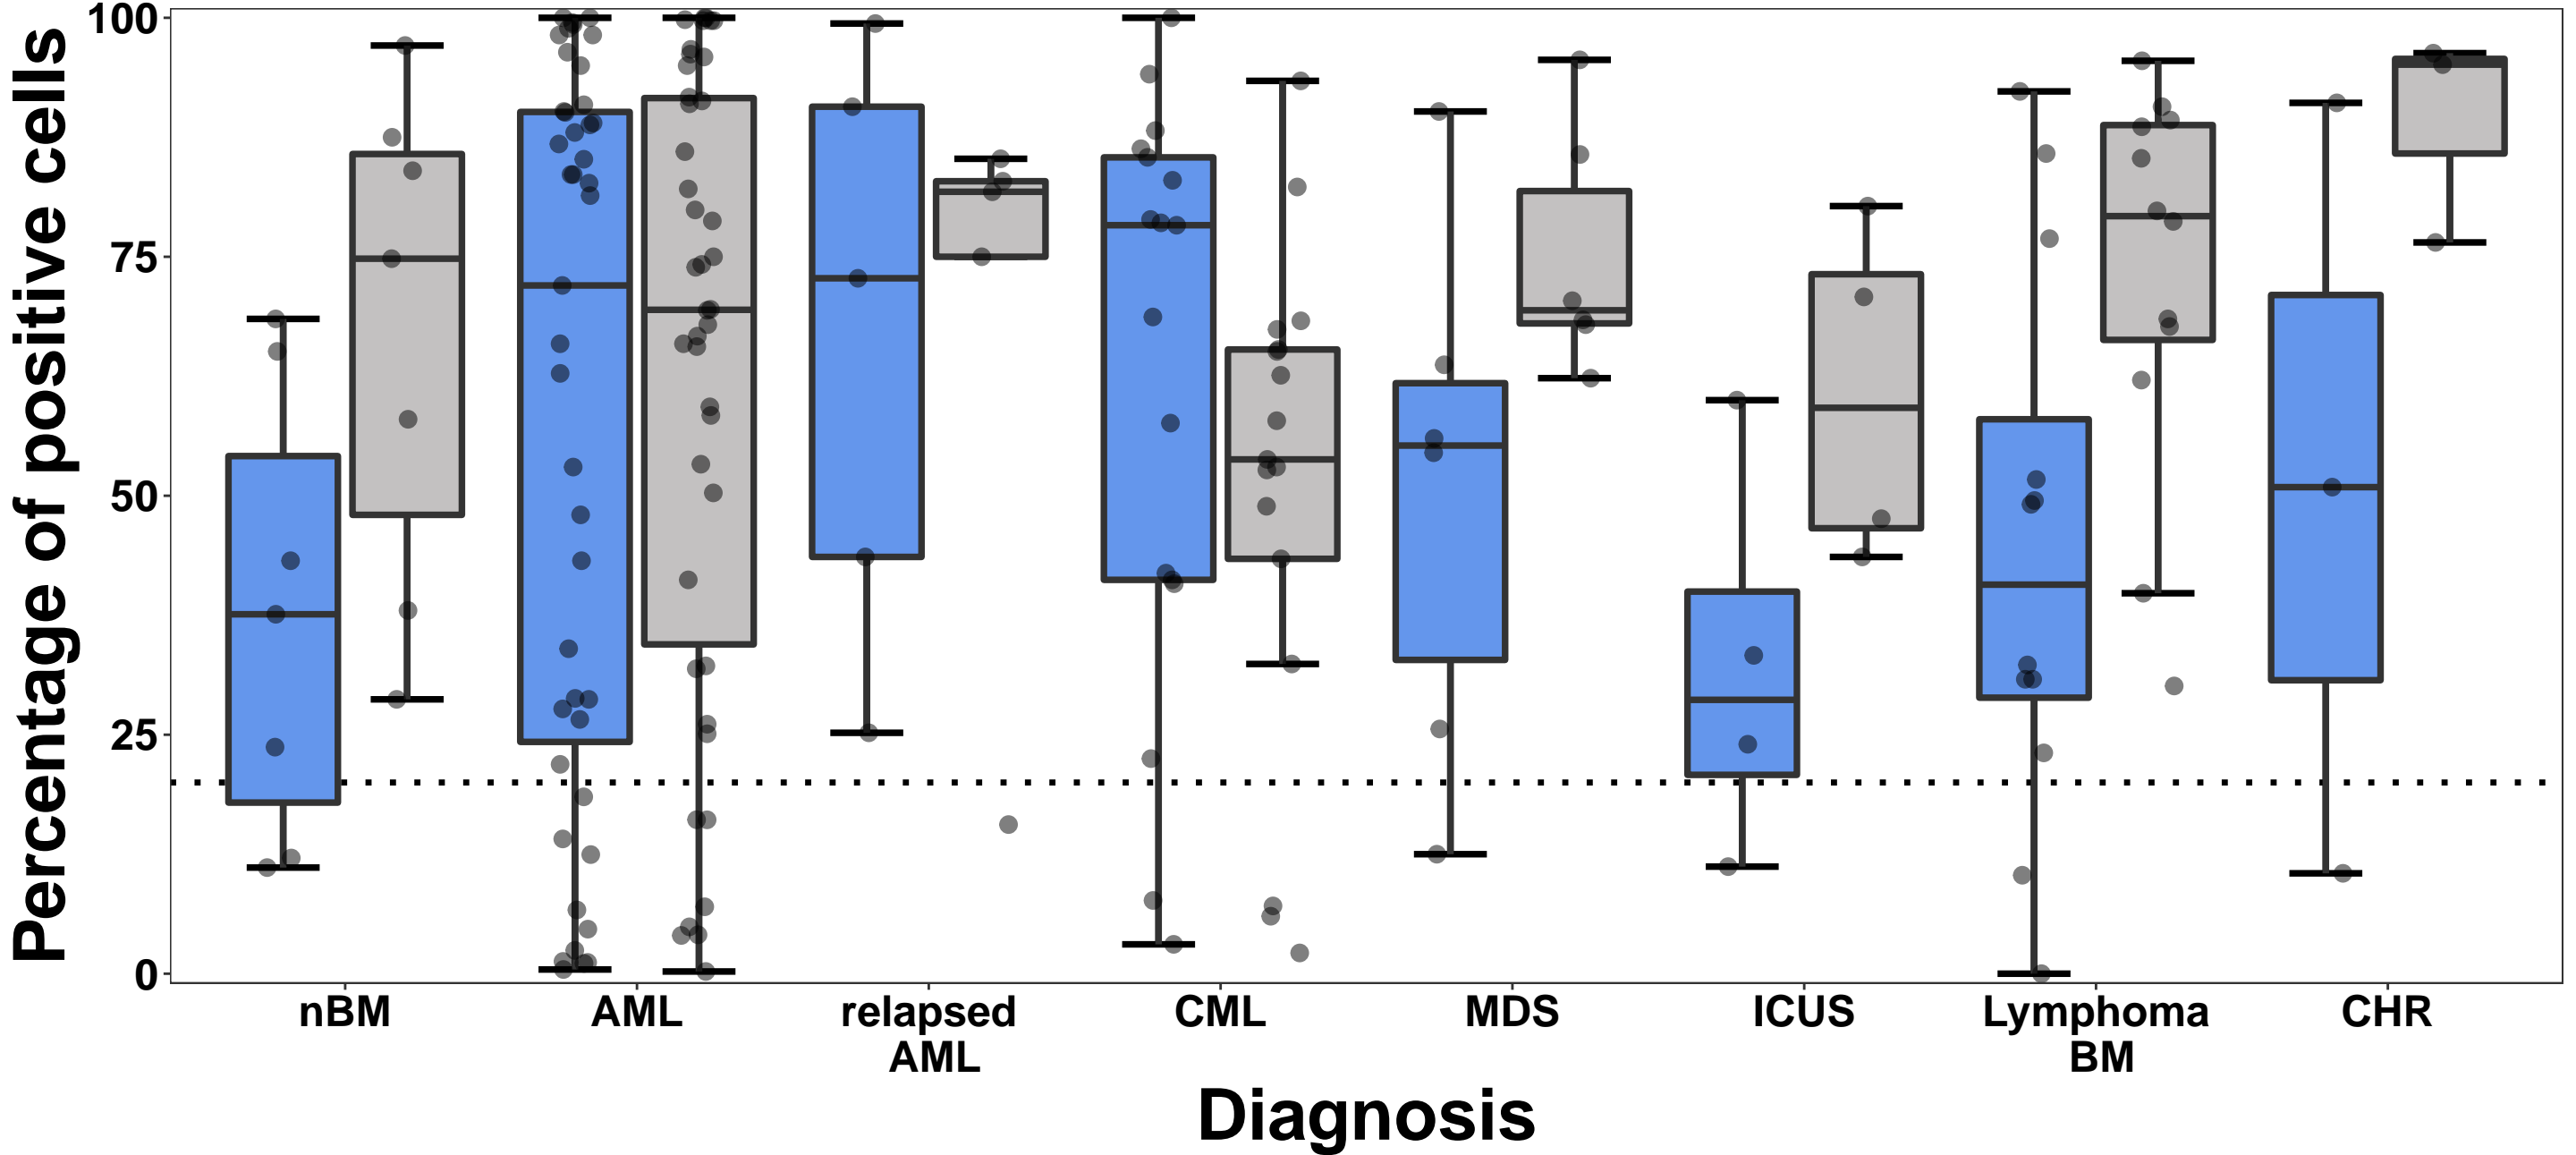

Cell fraction  CD34+/CD38-  CD34+/CD38+

# CD19 staining index

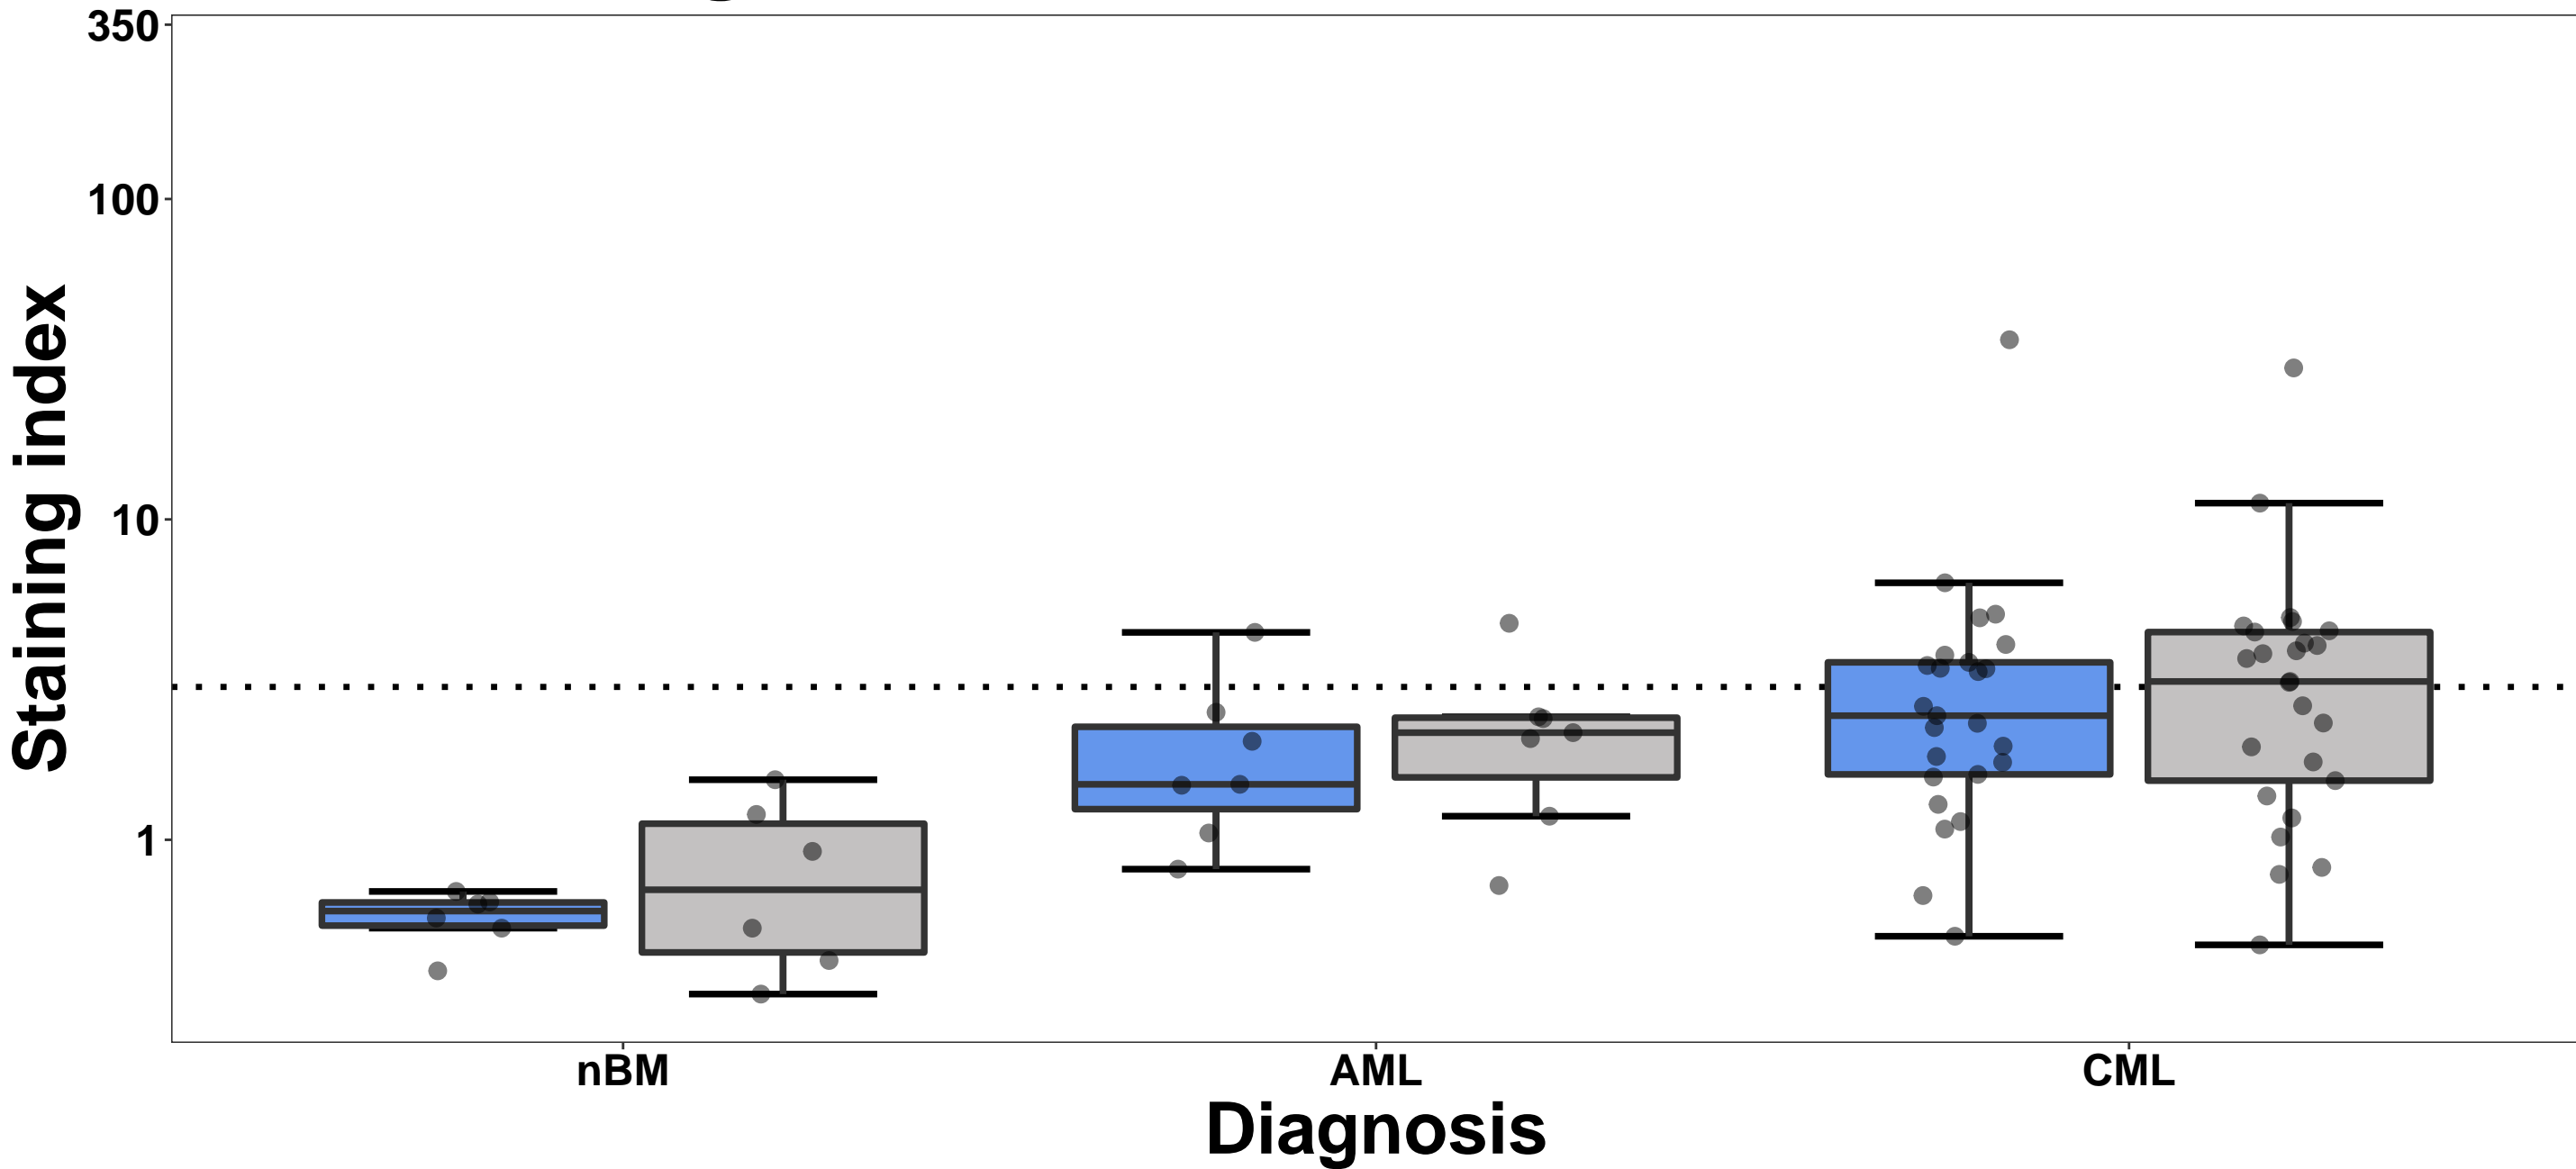

Cell fraction  CD34+/CD38-  CD34+/CD38+

# CD19 percentage

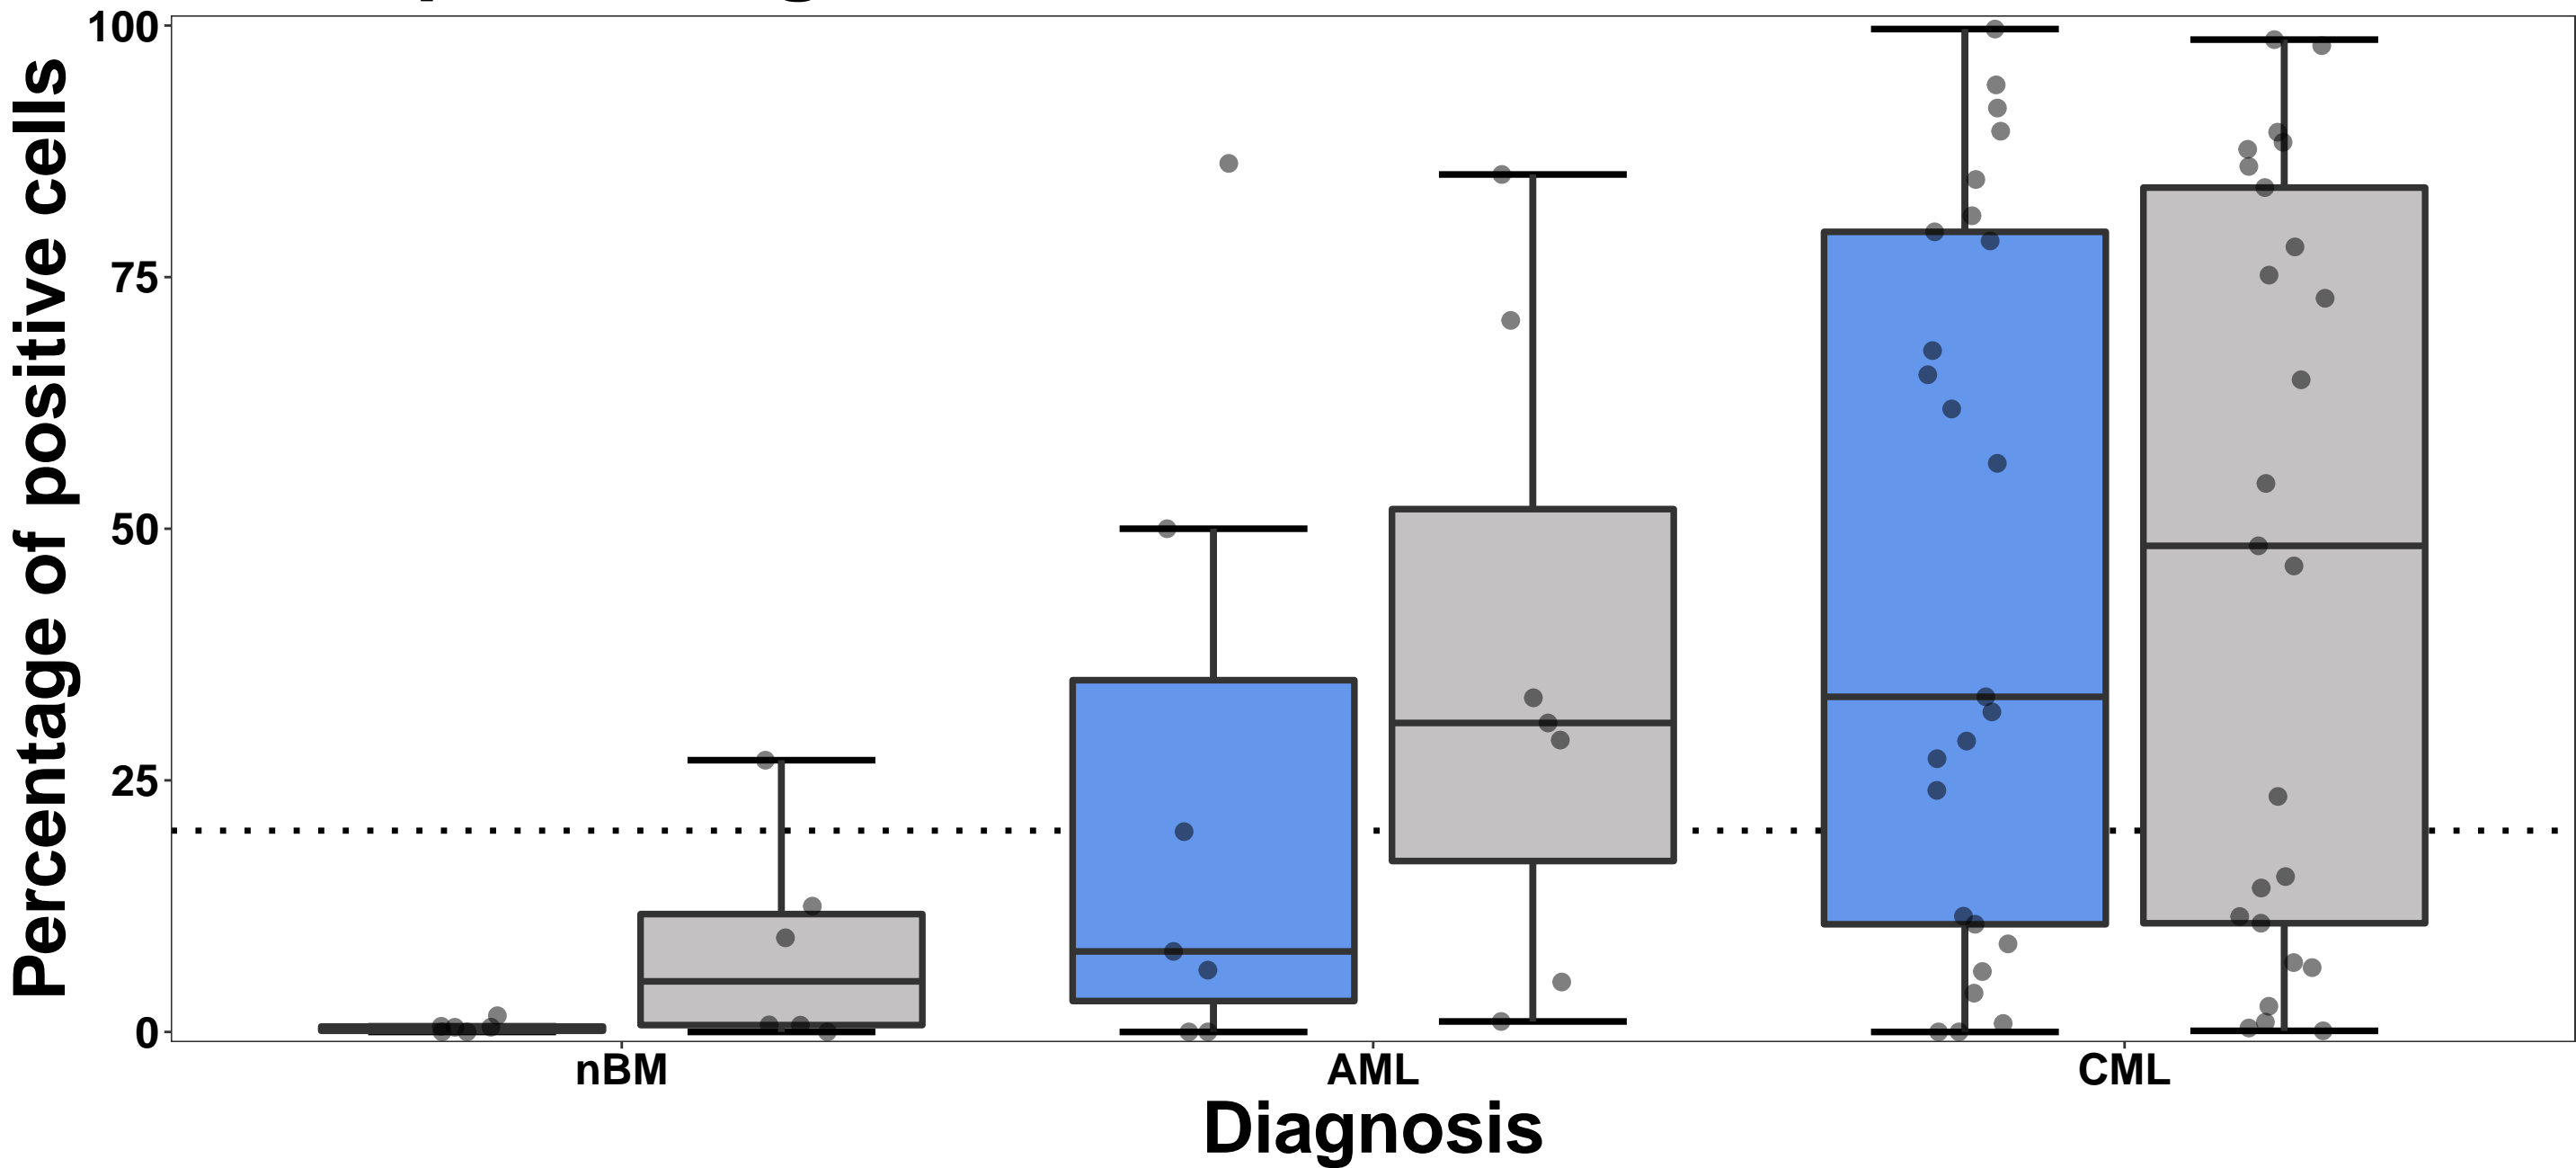

Cell fraction  CD34+/CD38-  CD34+/CD38+

# CD20 staining index

Staining index

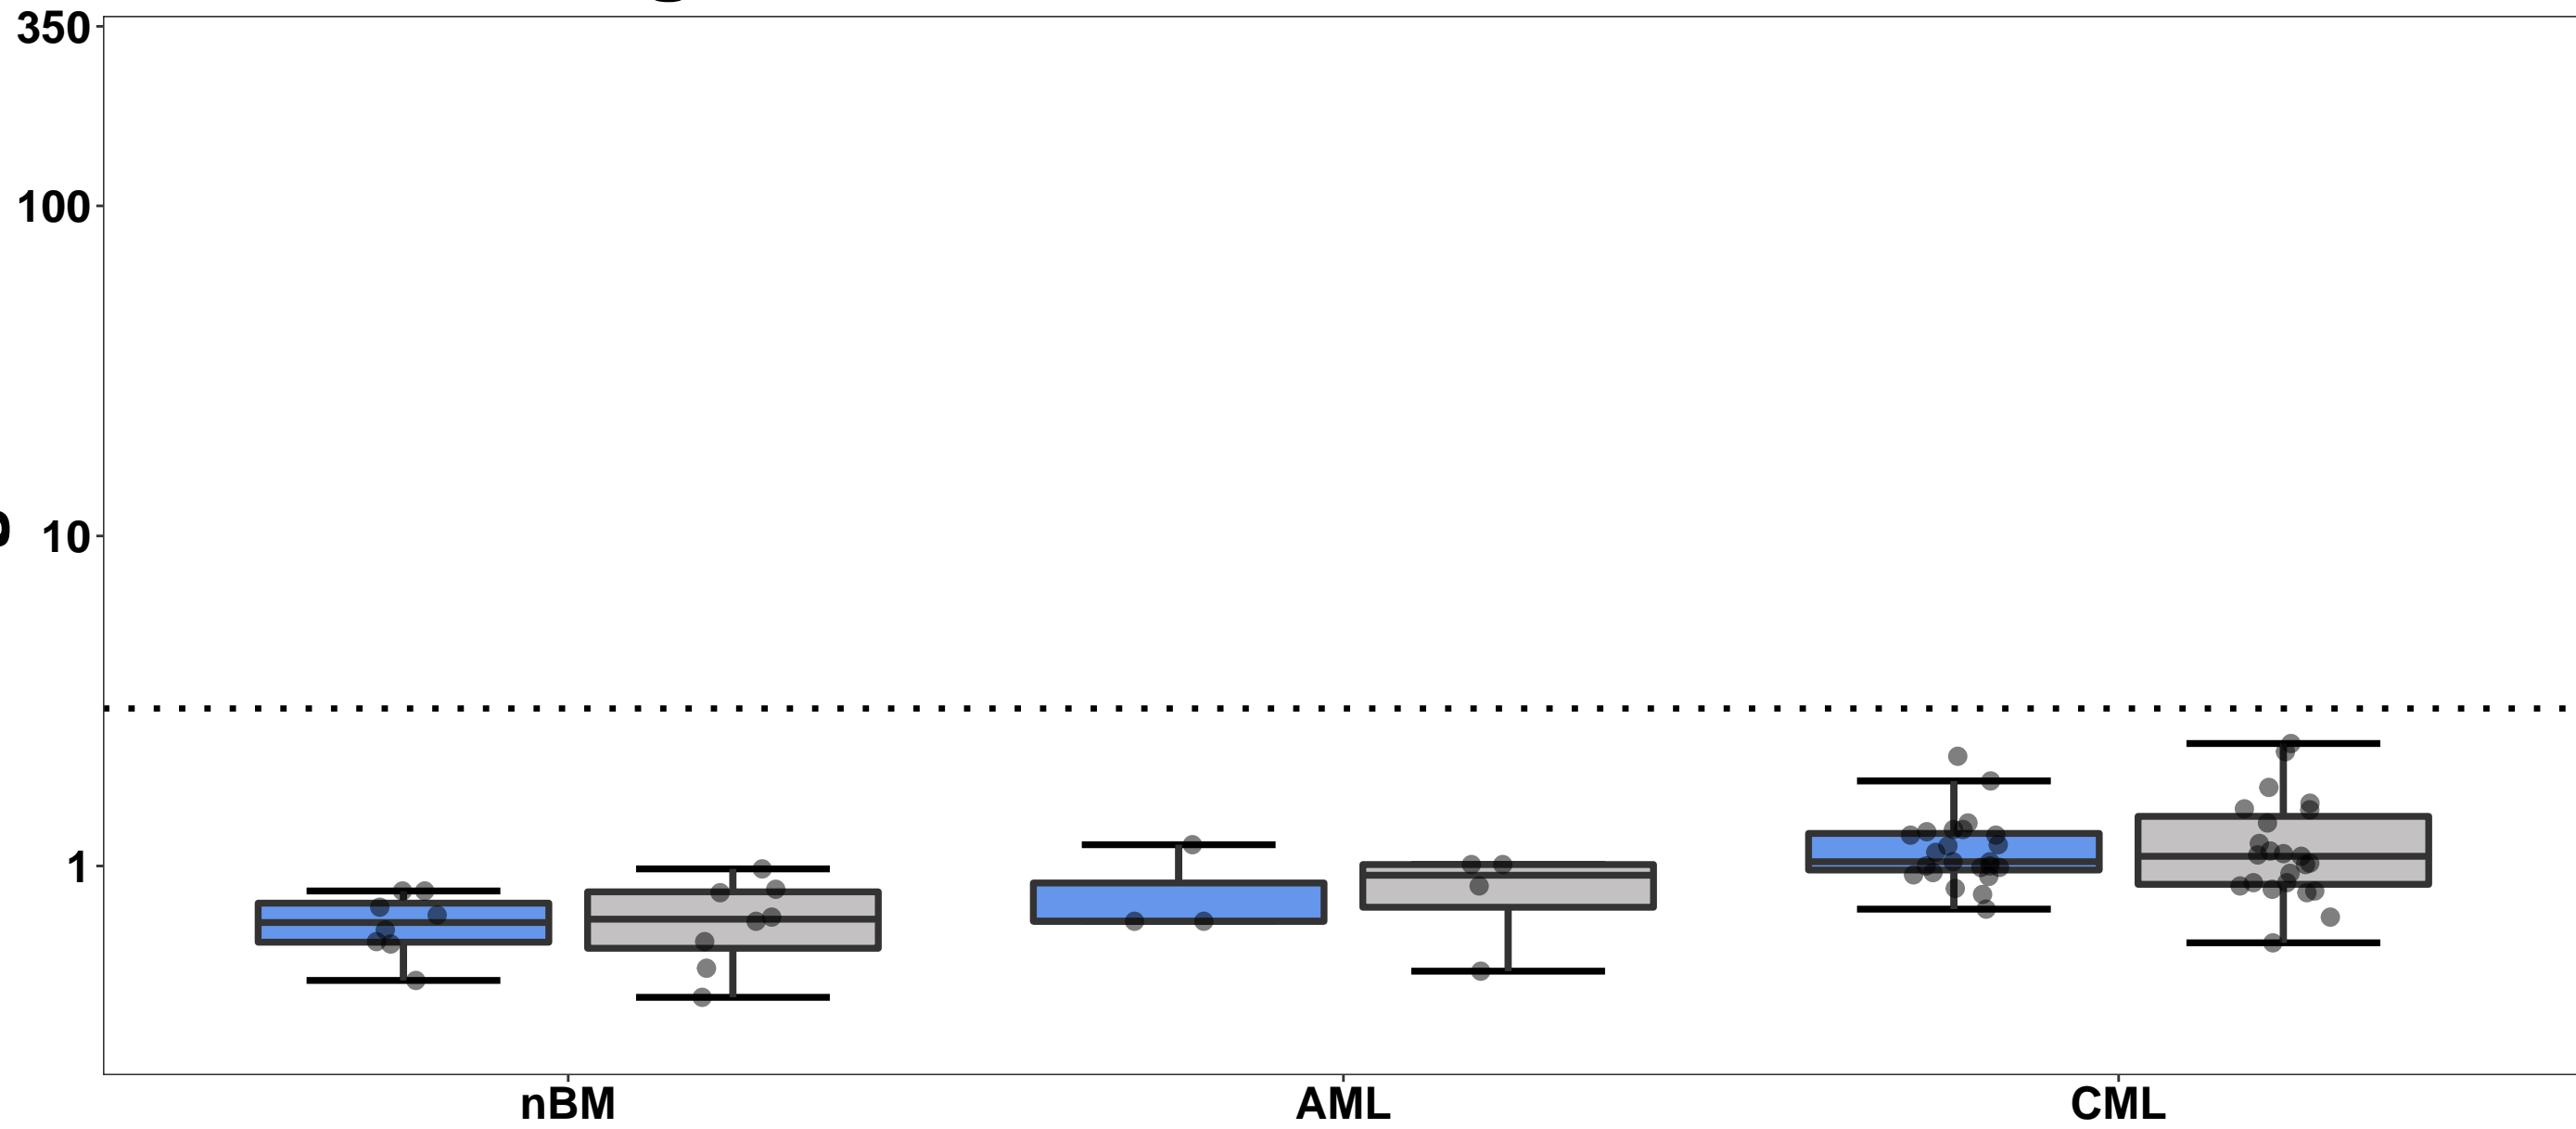

Diagnosis

Cell fraction  CD34+/CD38-  CD34+/CD38+

# CD20 percentage

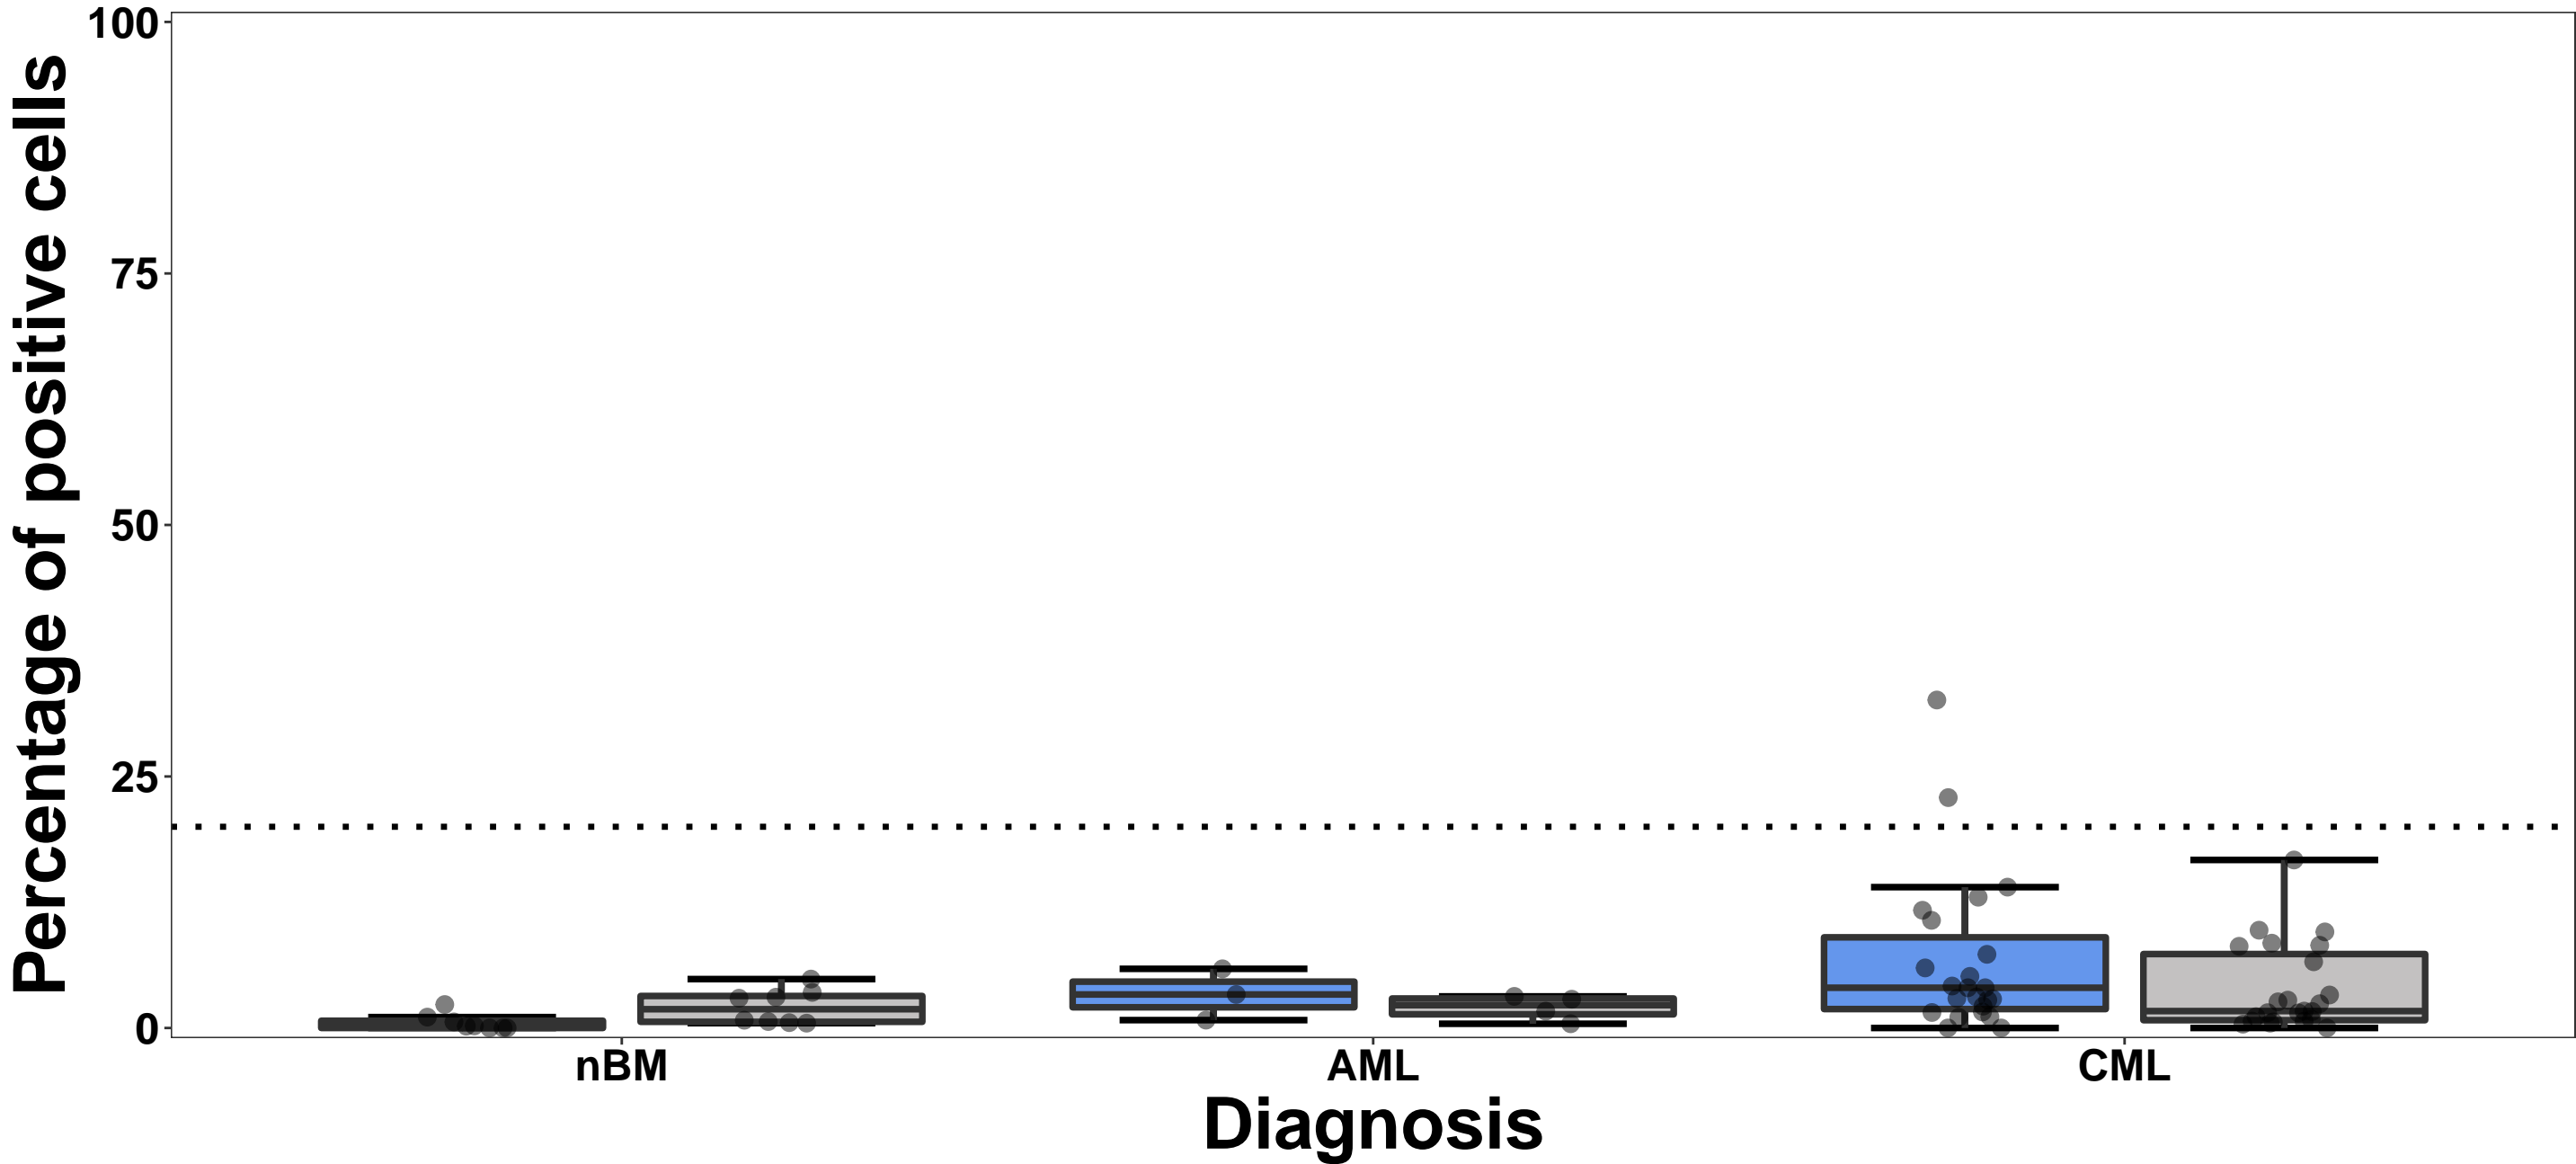

# CD23 staining index

Cell fraction  CD34+/CD38-  CD34+/CD38+

Staining index

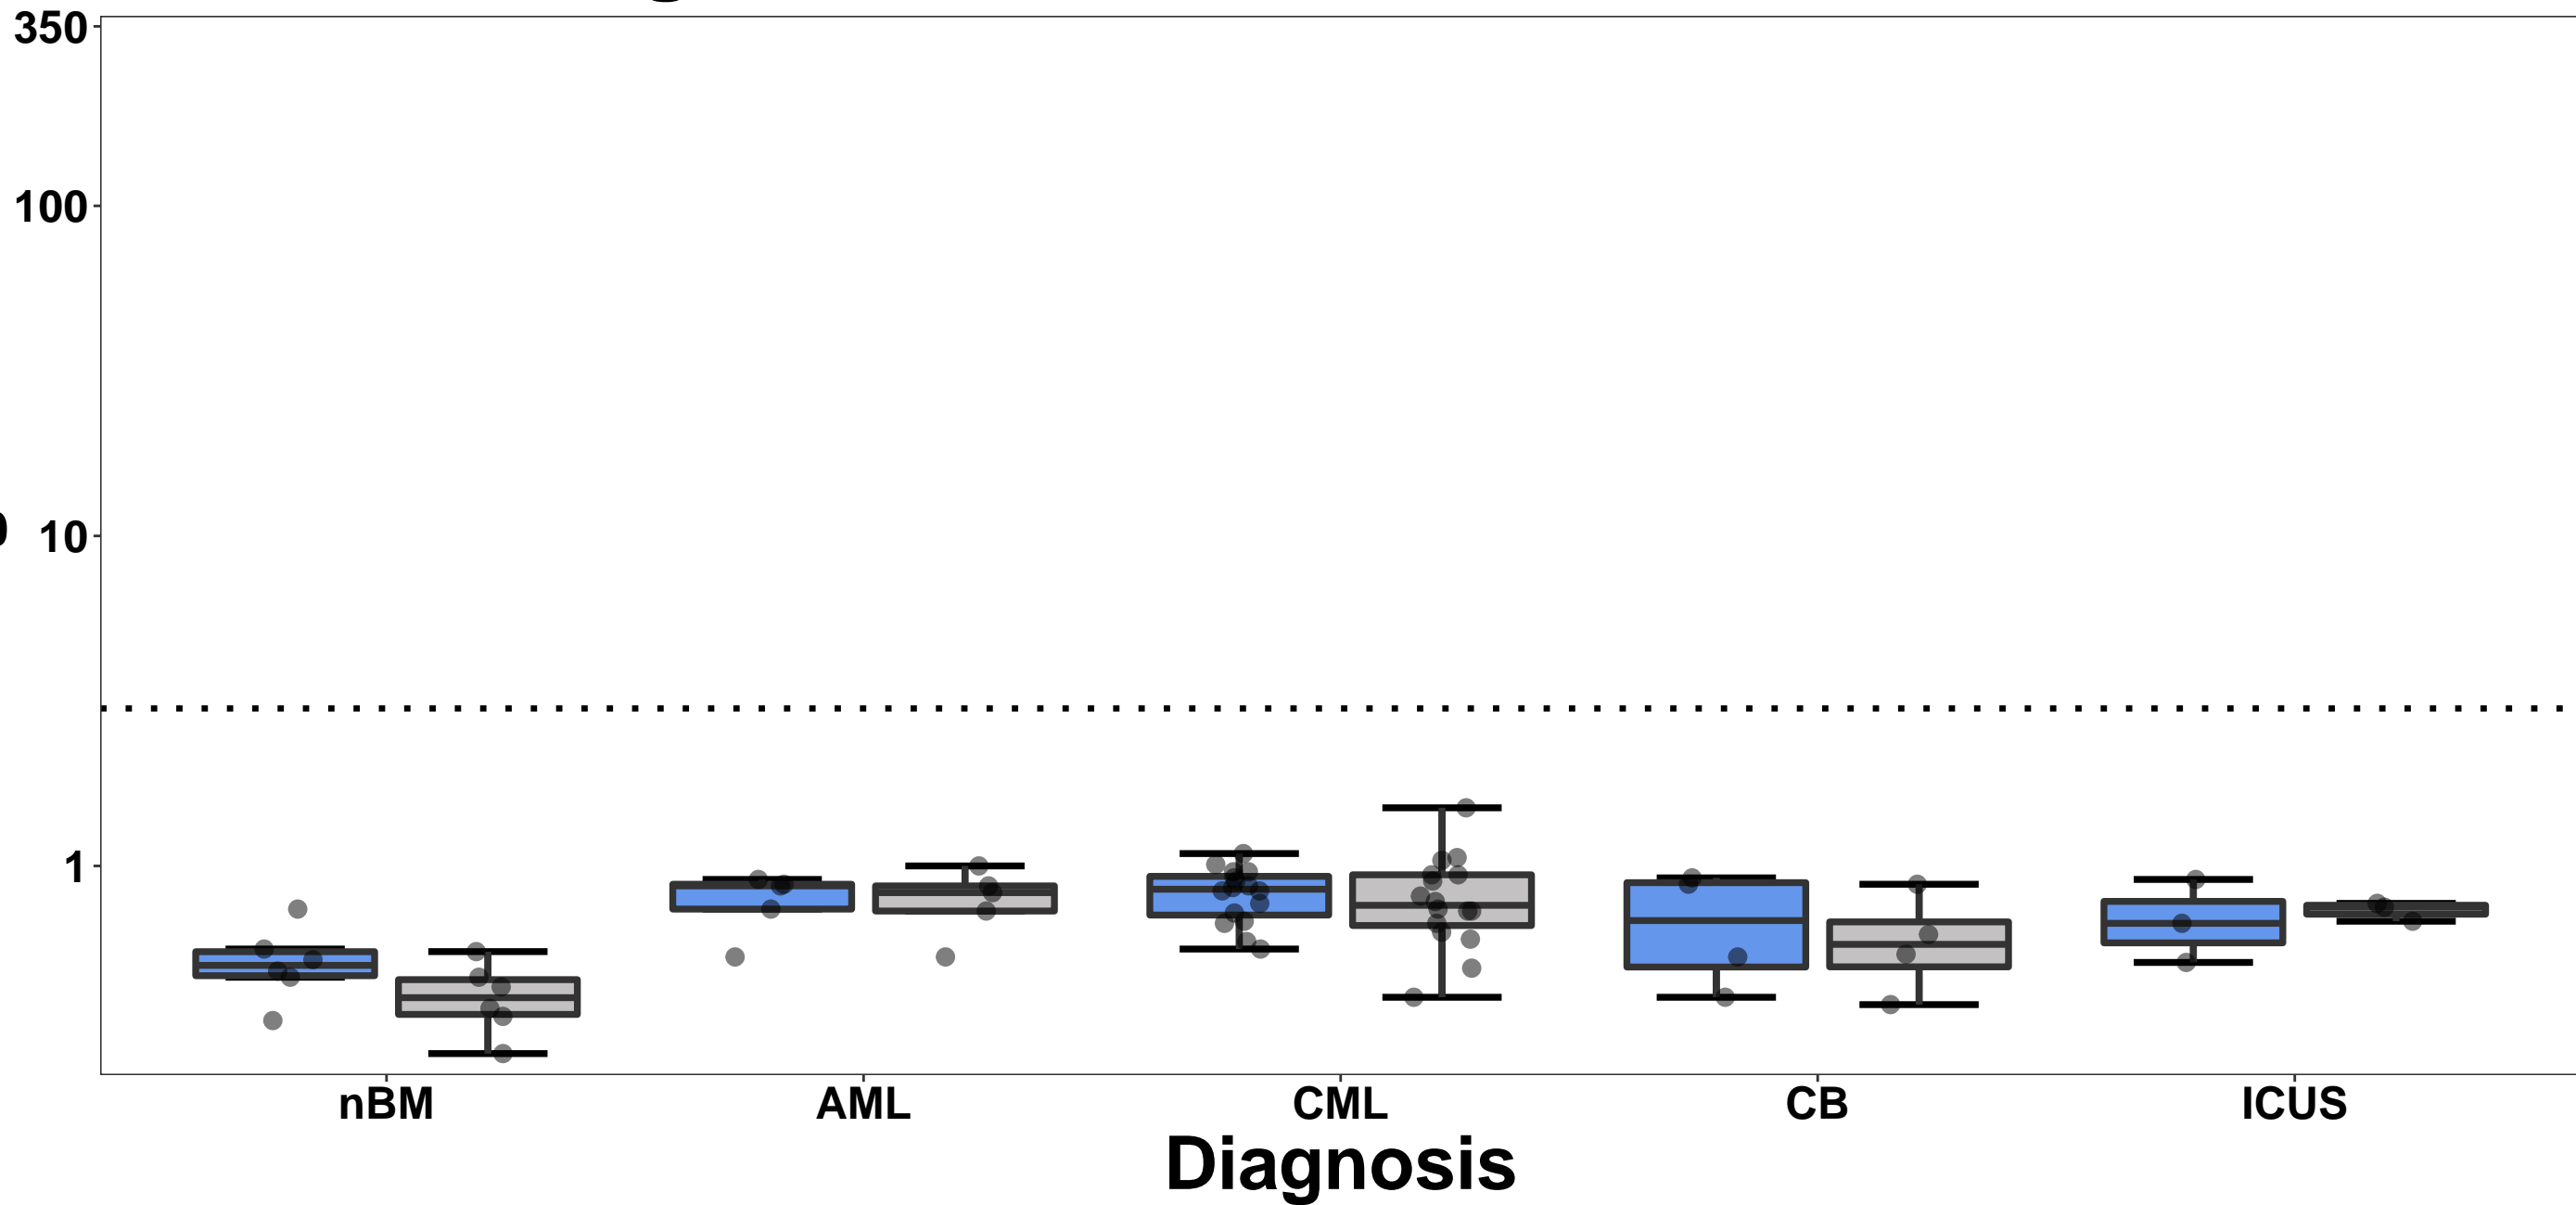

Cell fraction CD34+/CD38- CD34+/CD38+

# CD23 percentage

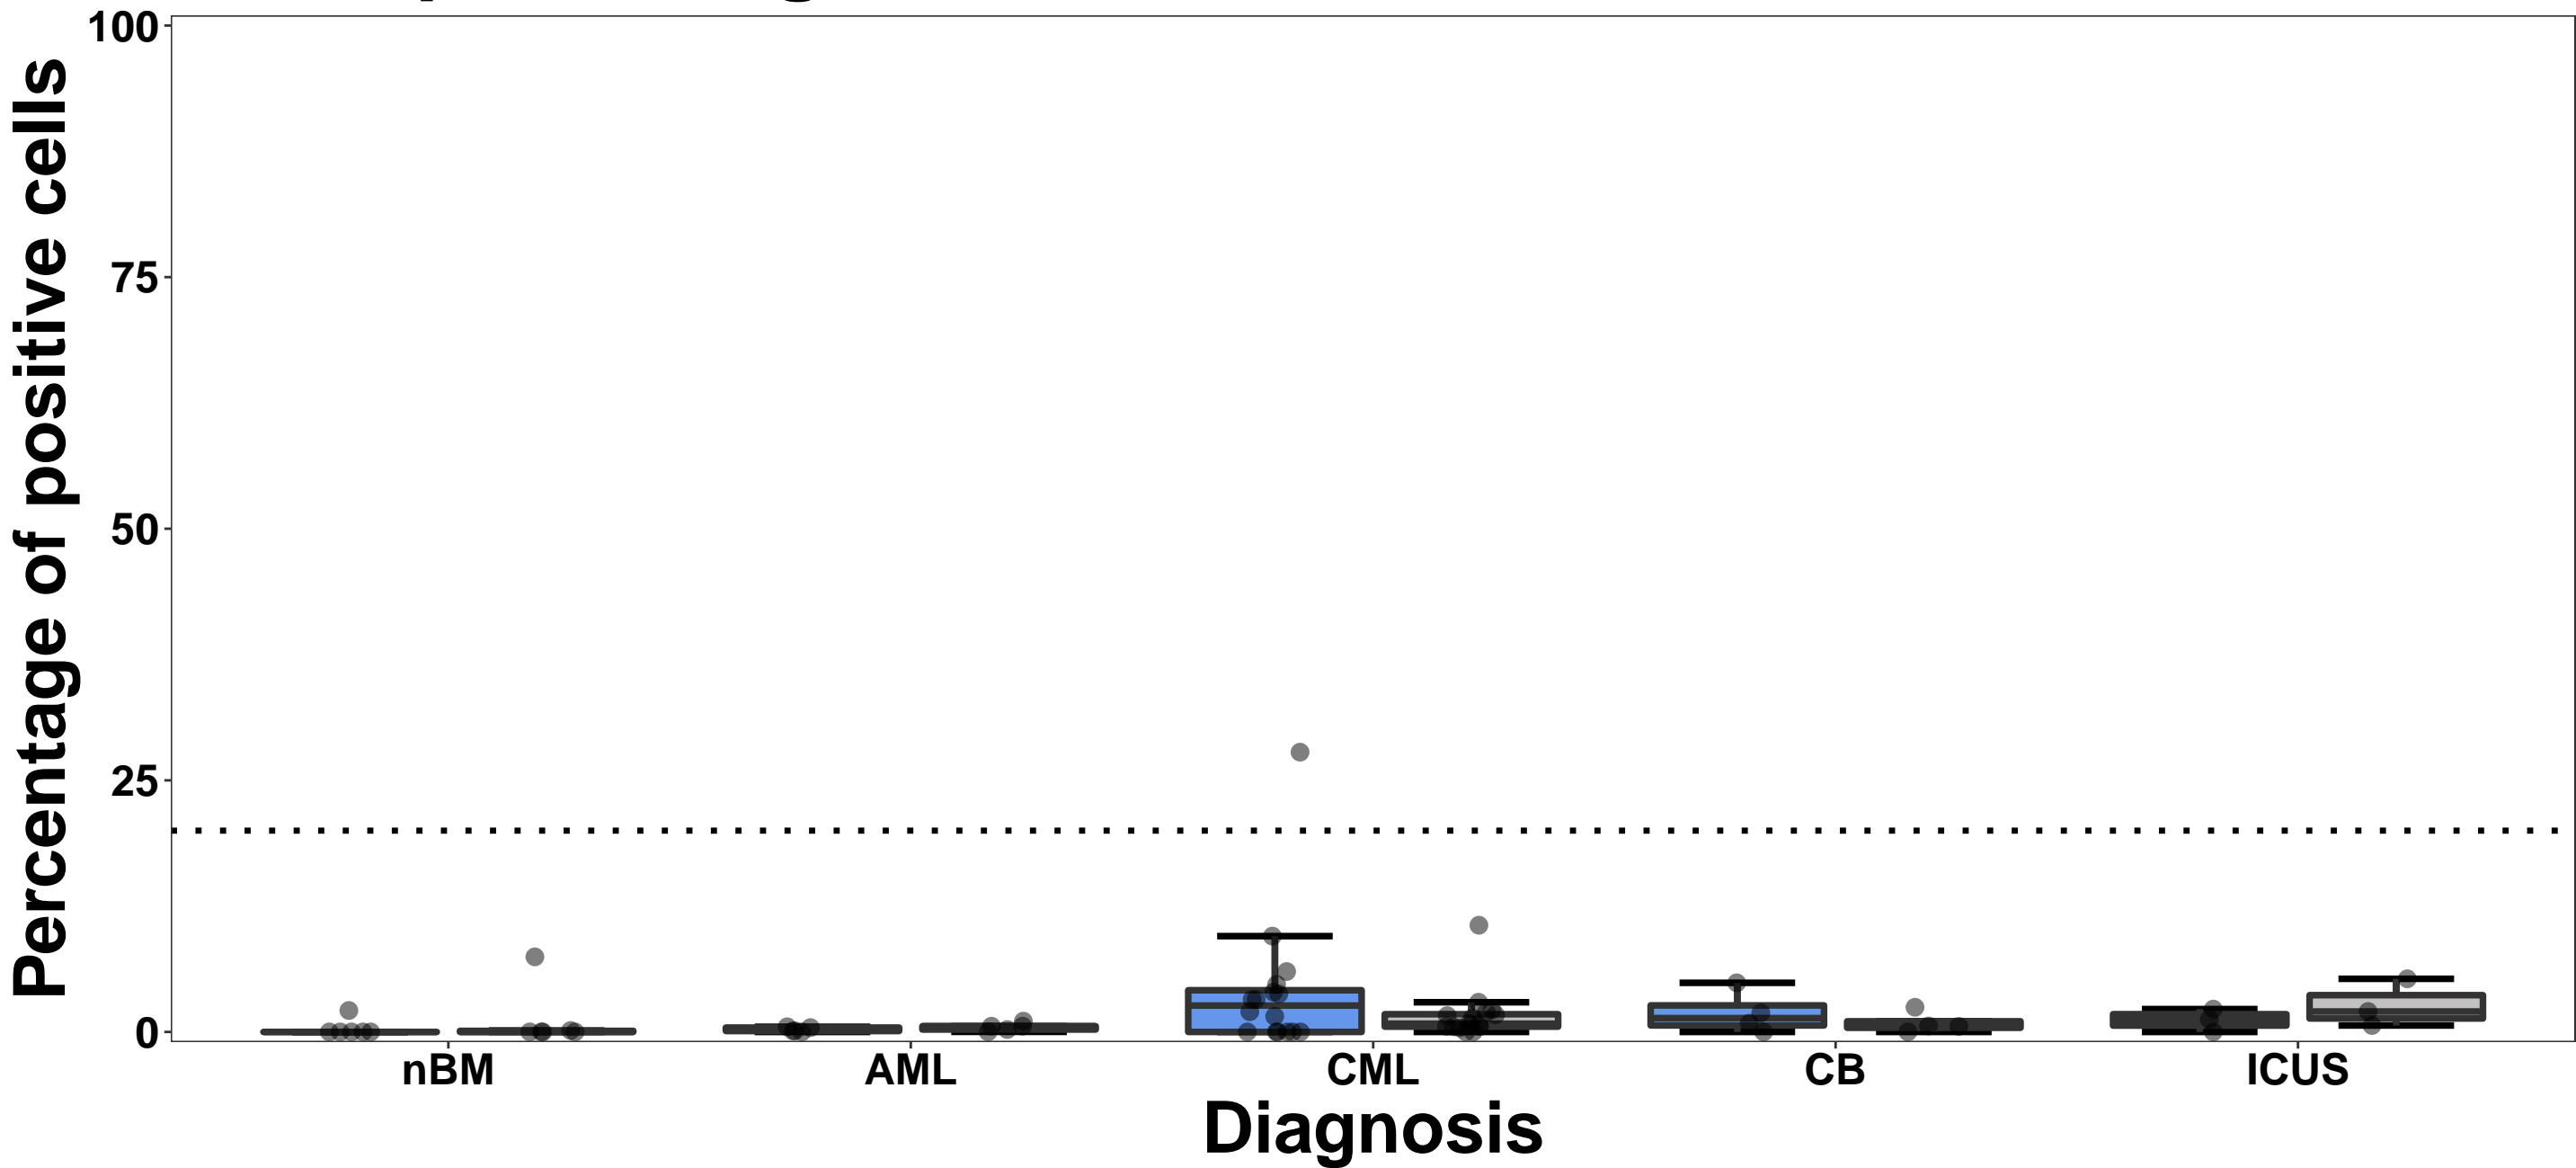

Cell fraction  CD34+/CD38-  CD34+/CD38+

# CD25 staining index

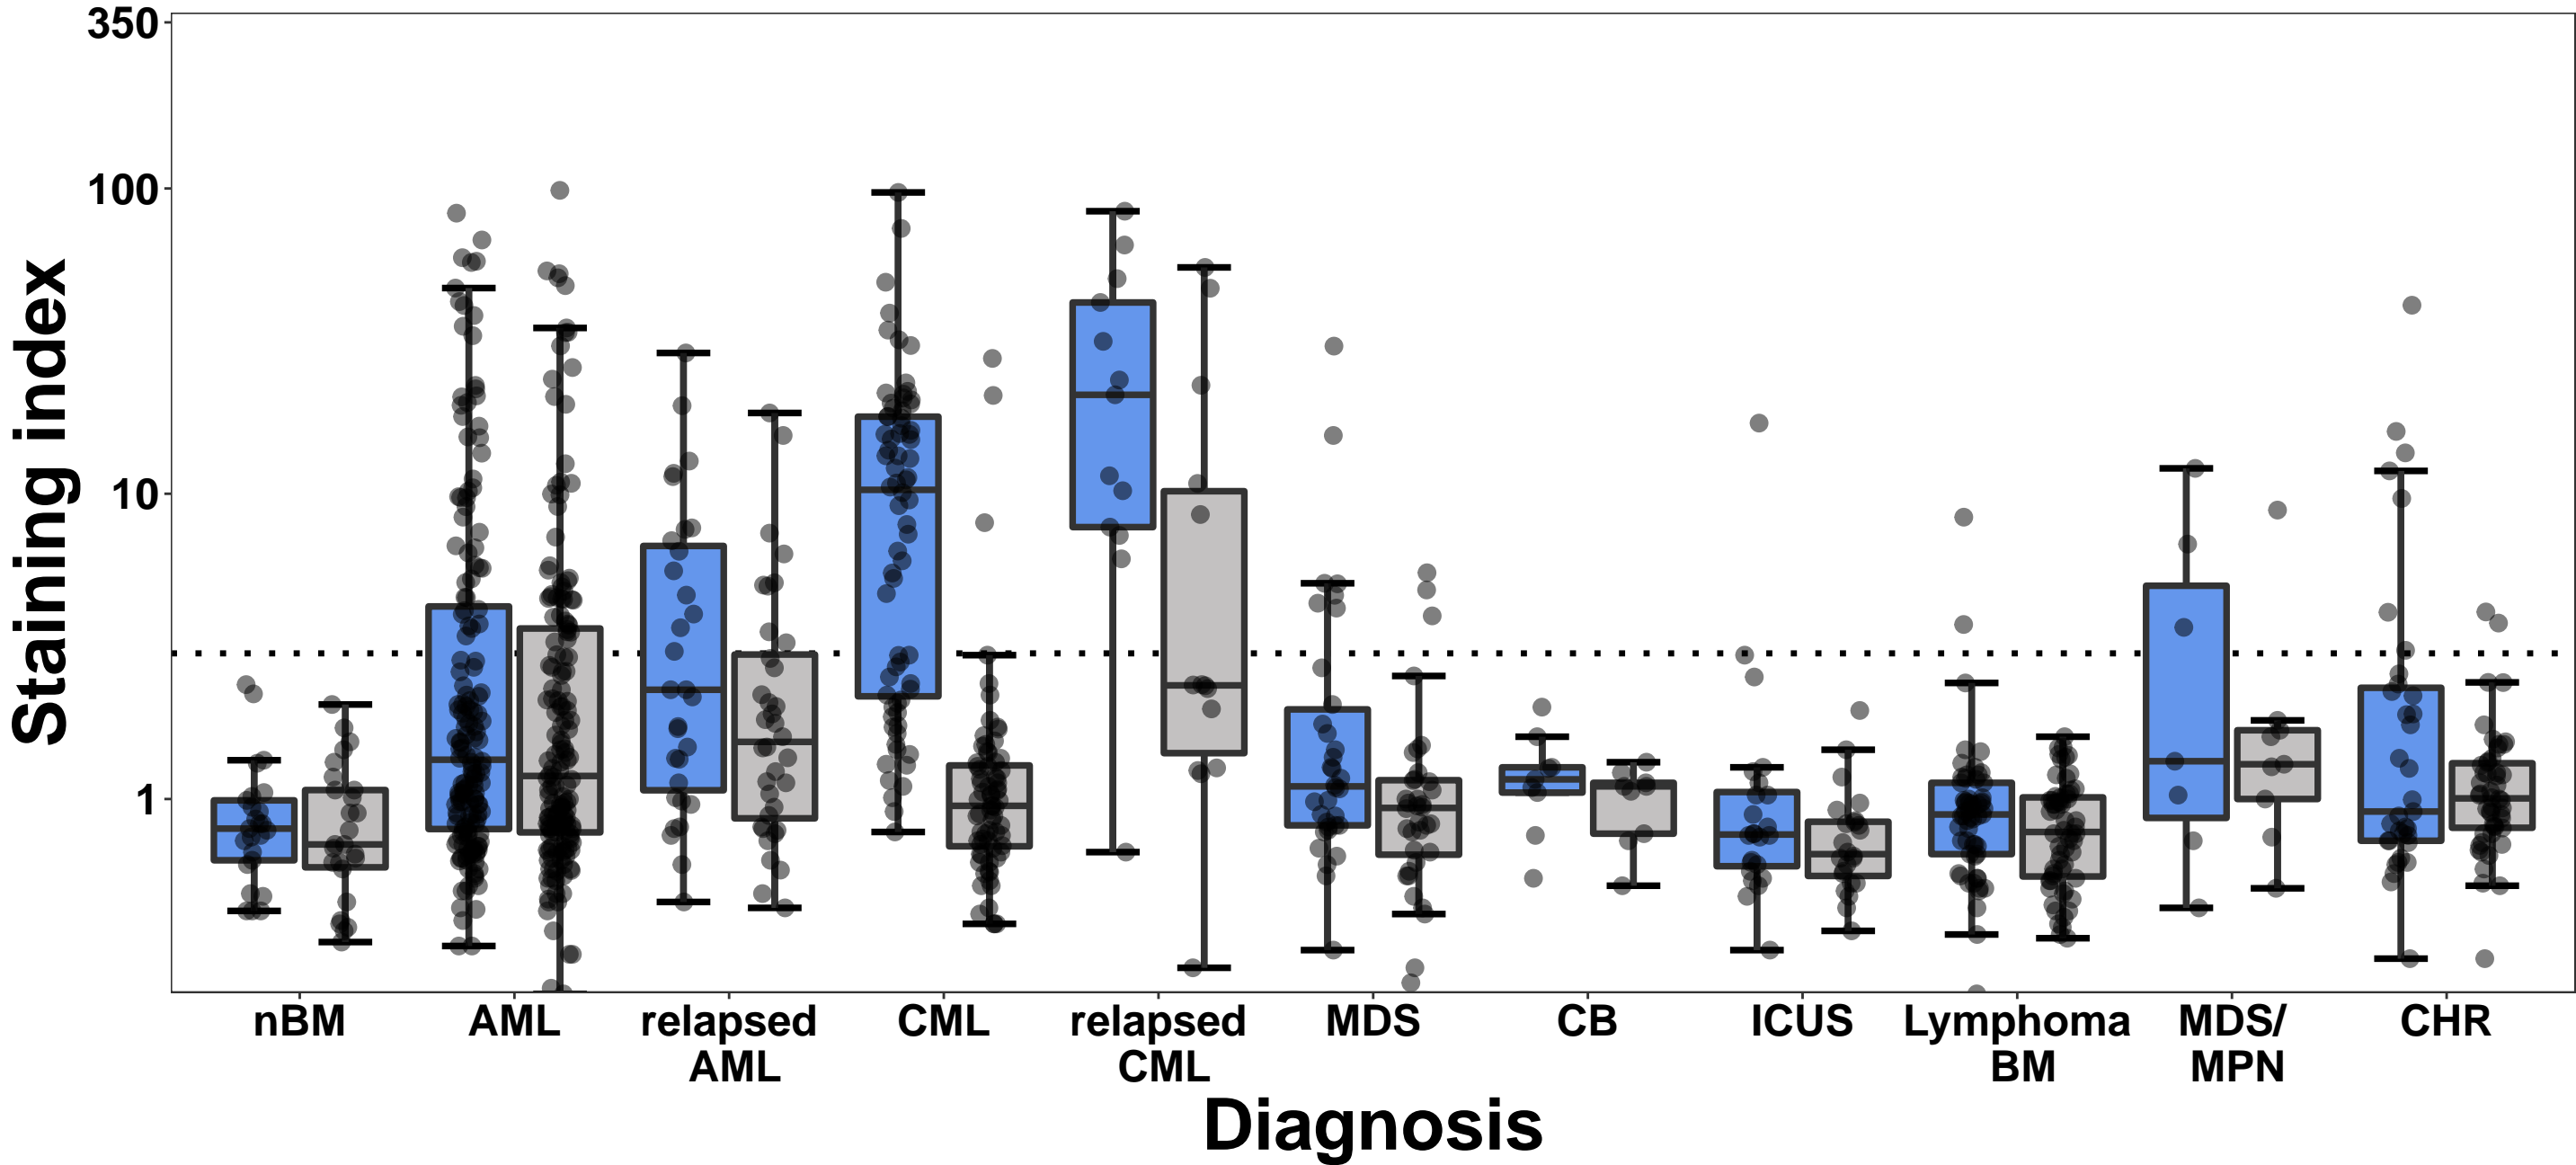



Cell fraction  CD34+/CD38-  CD34+/CD38+

# CD25 percentage

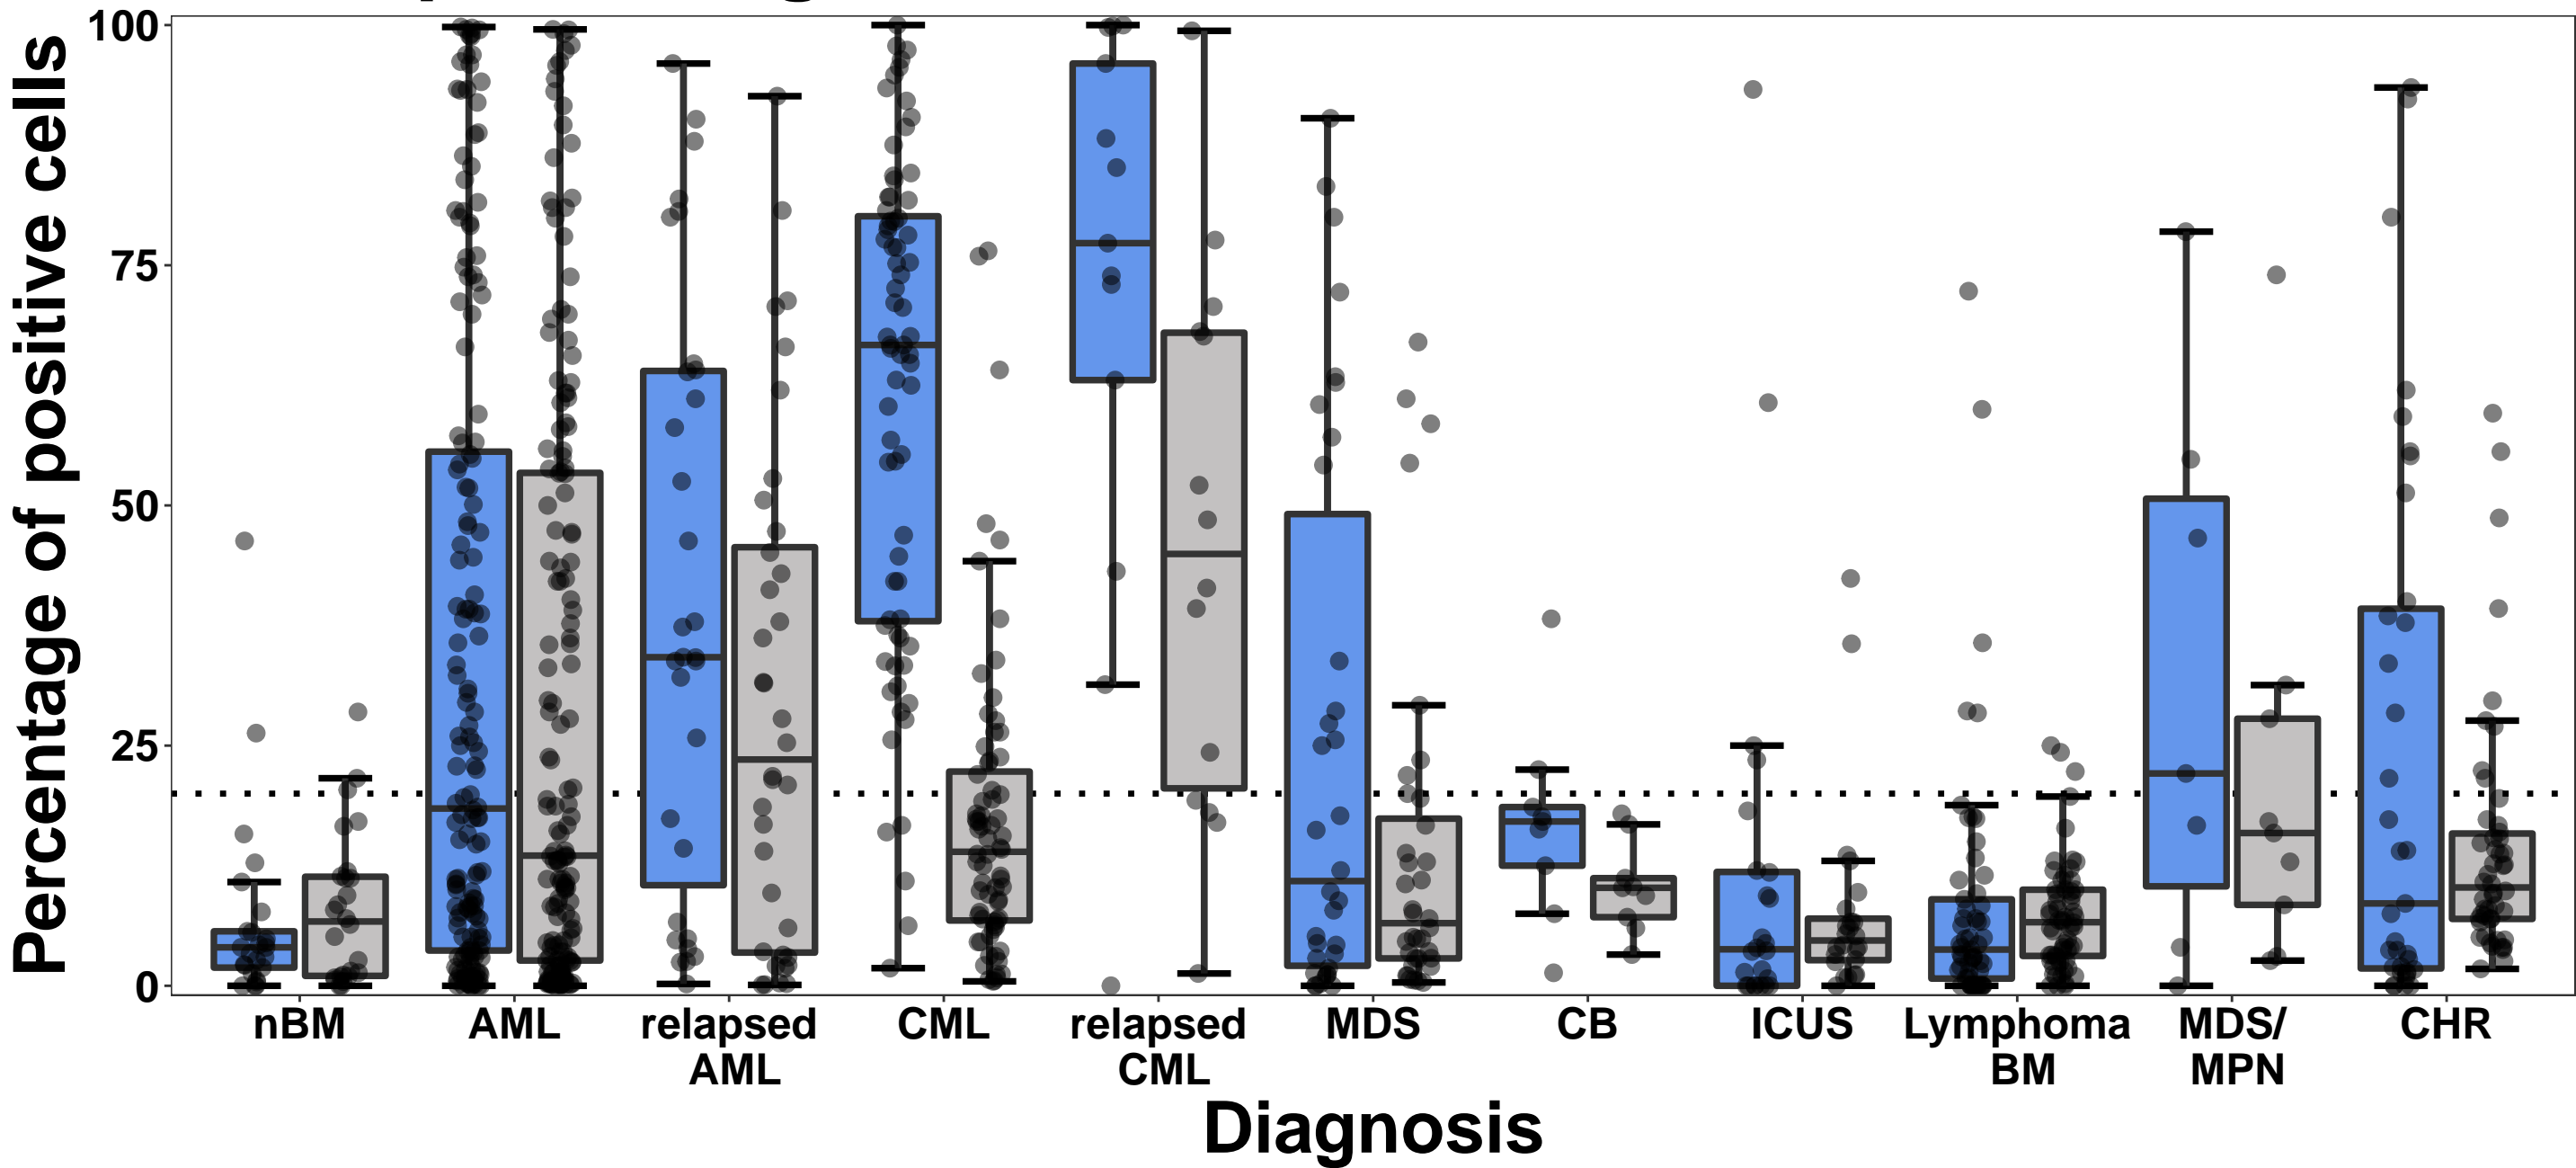

Cell fraction  CD34+/CD38-  CD34+/CD38+

# CD26 staining index

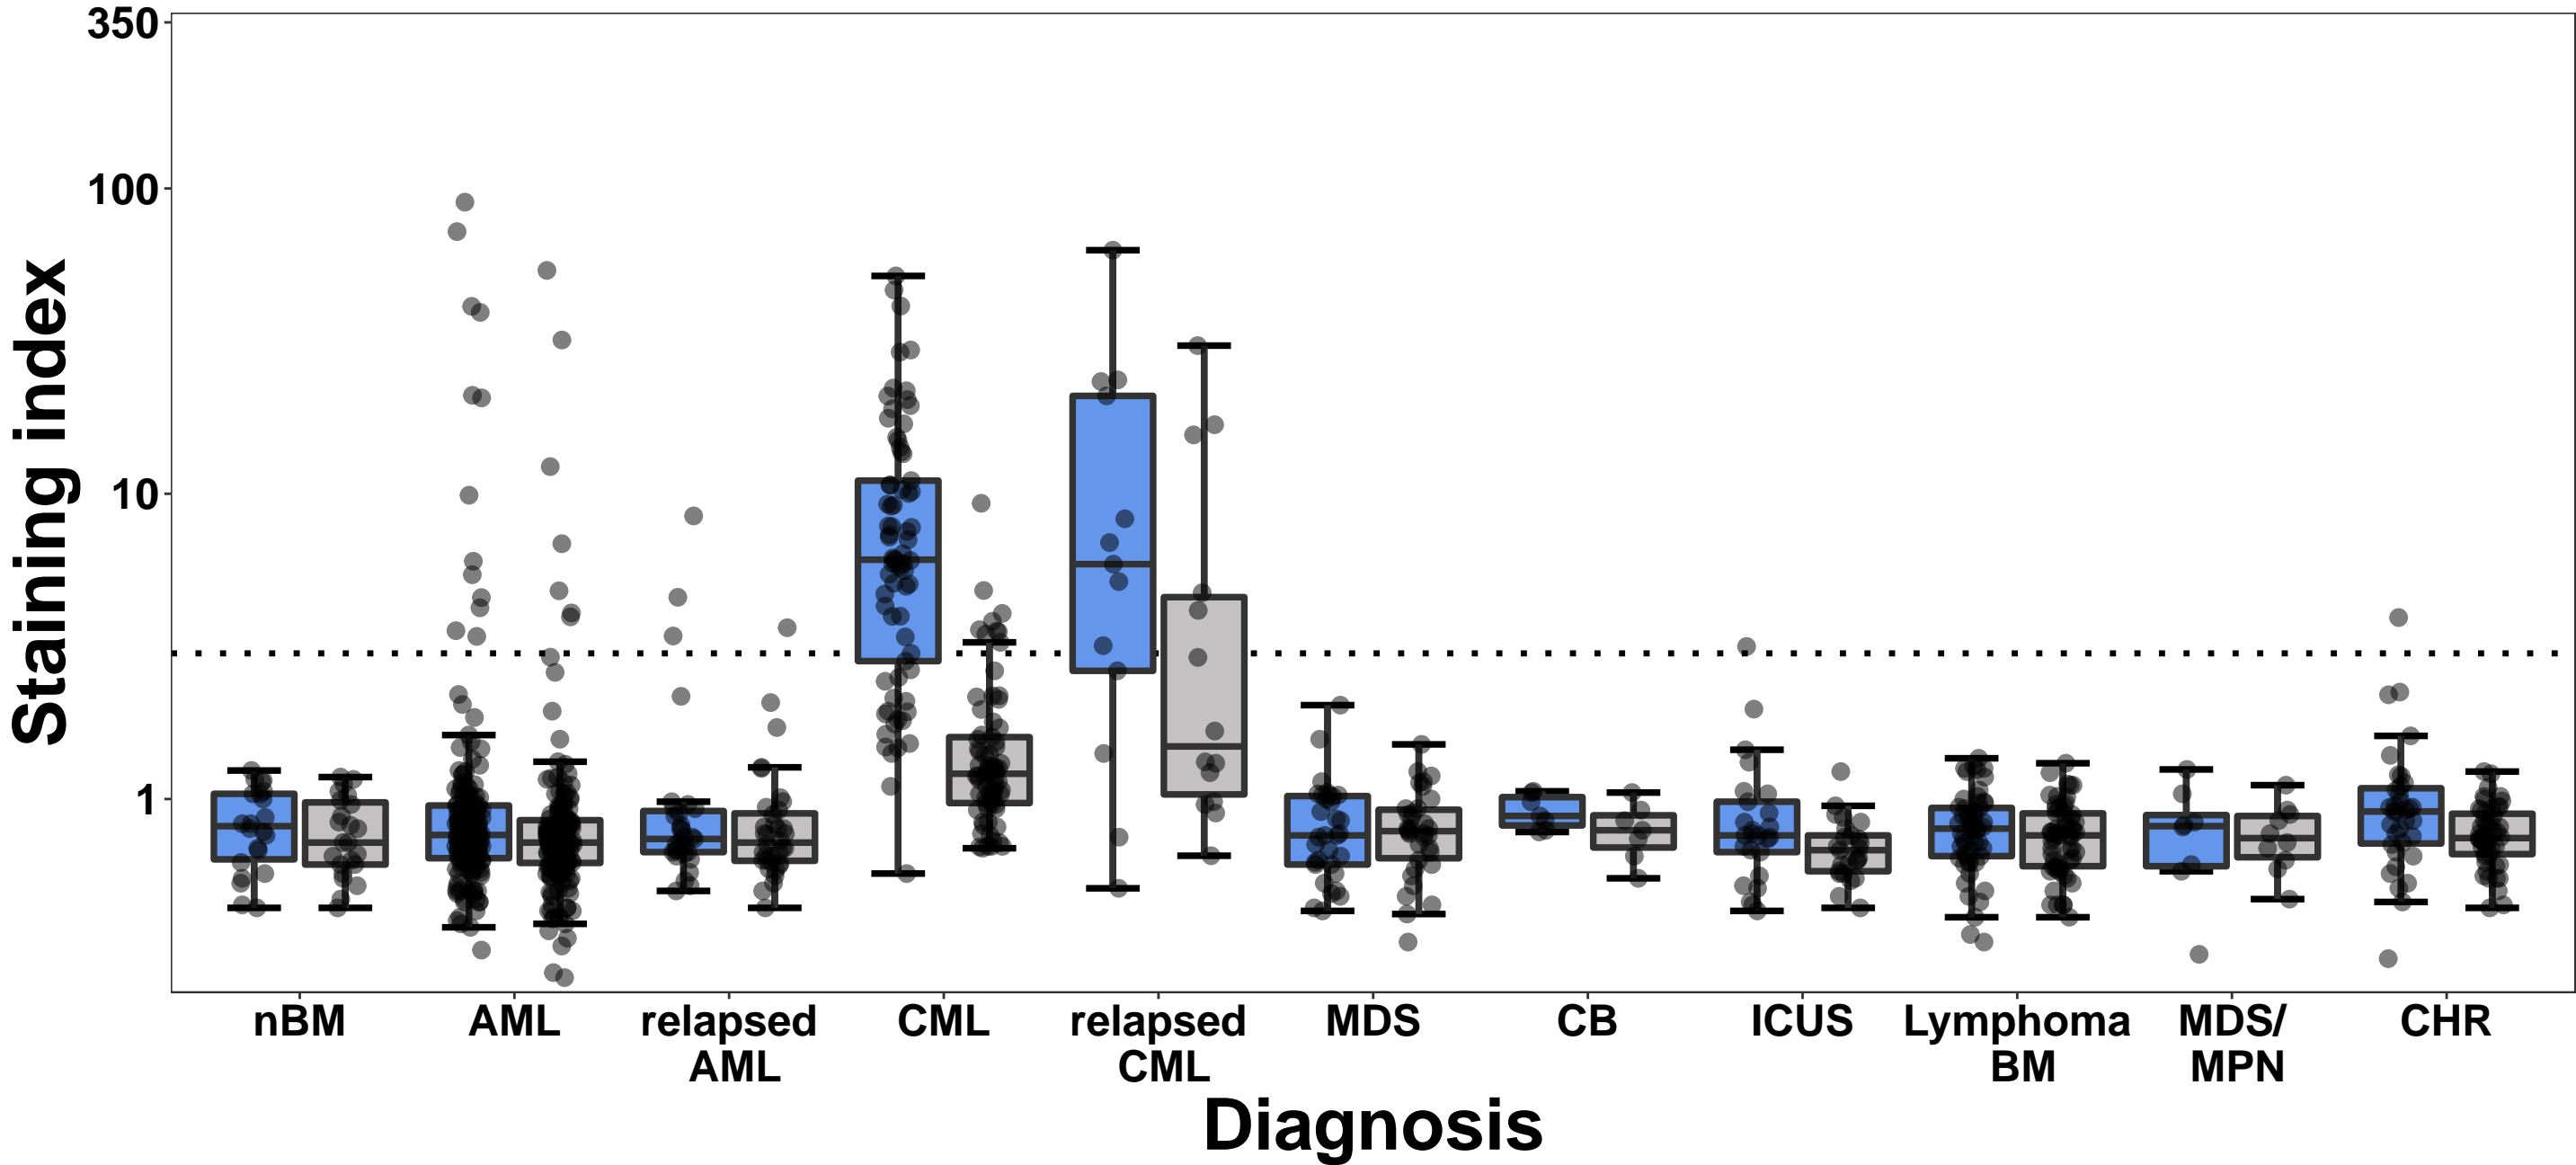

Cell fraction  CD34+/CD38-  CD34+/CD38+

# CD26 percentage

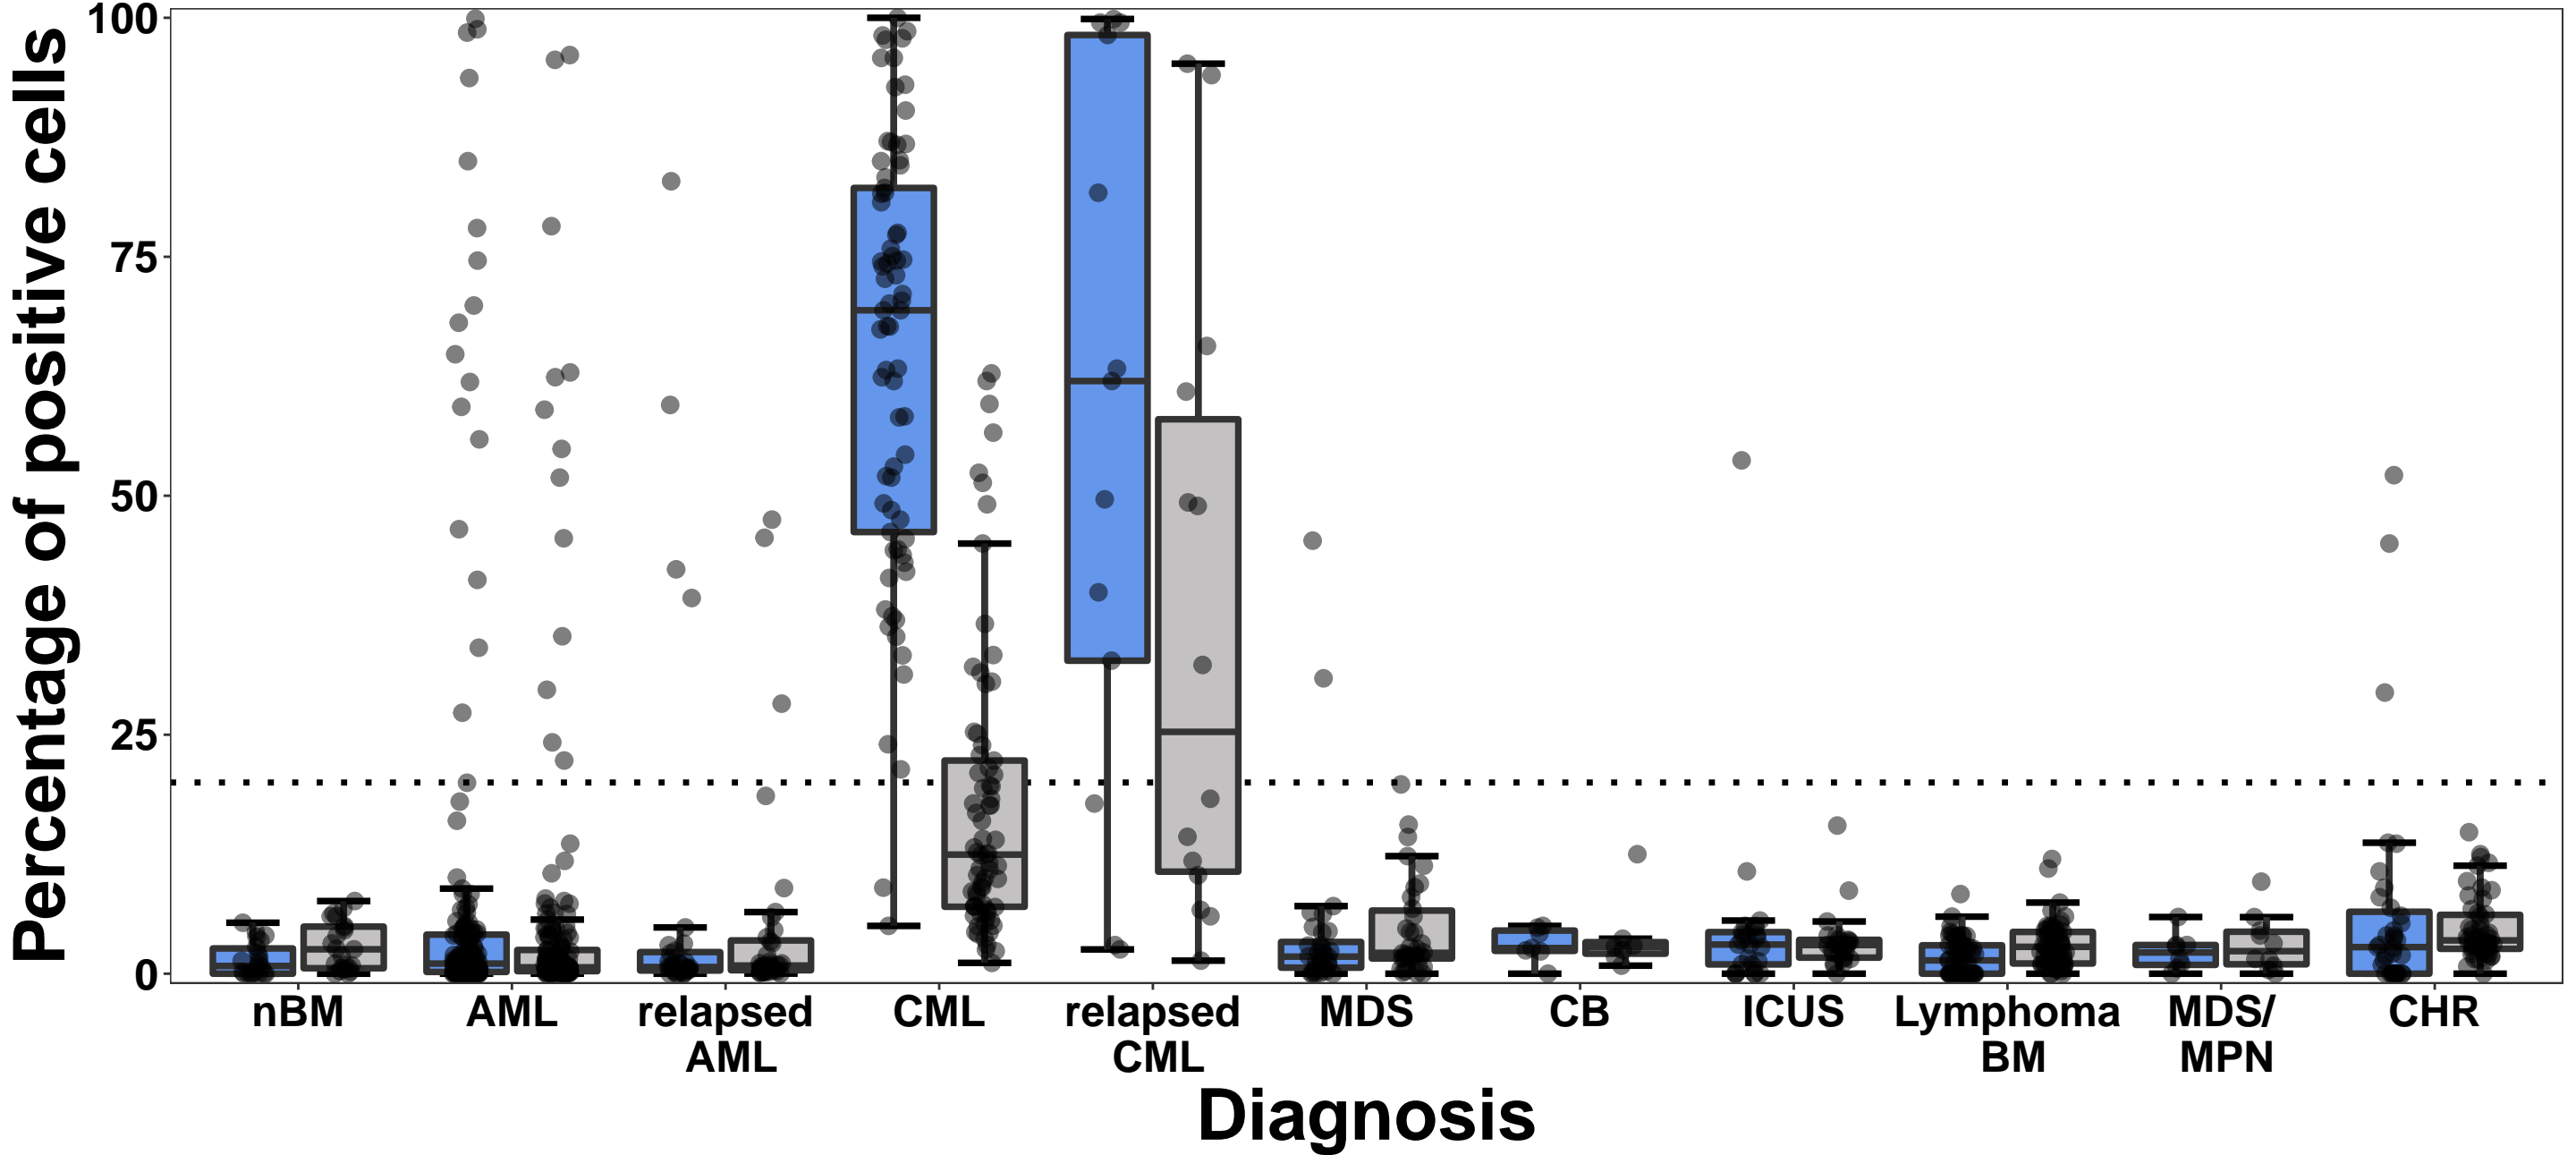

# CD29 staining index

Cell fraction  CD34+/CD38-  CD34+/CD38+

Staining index

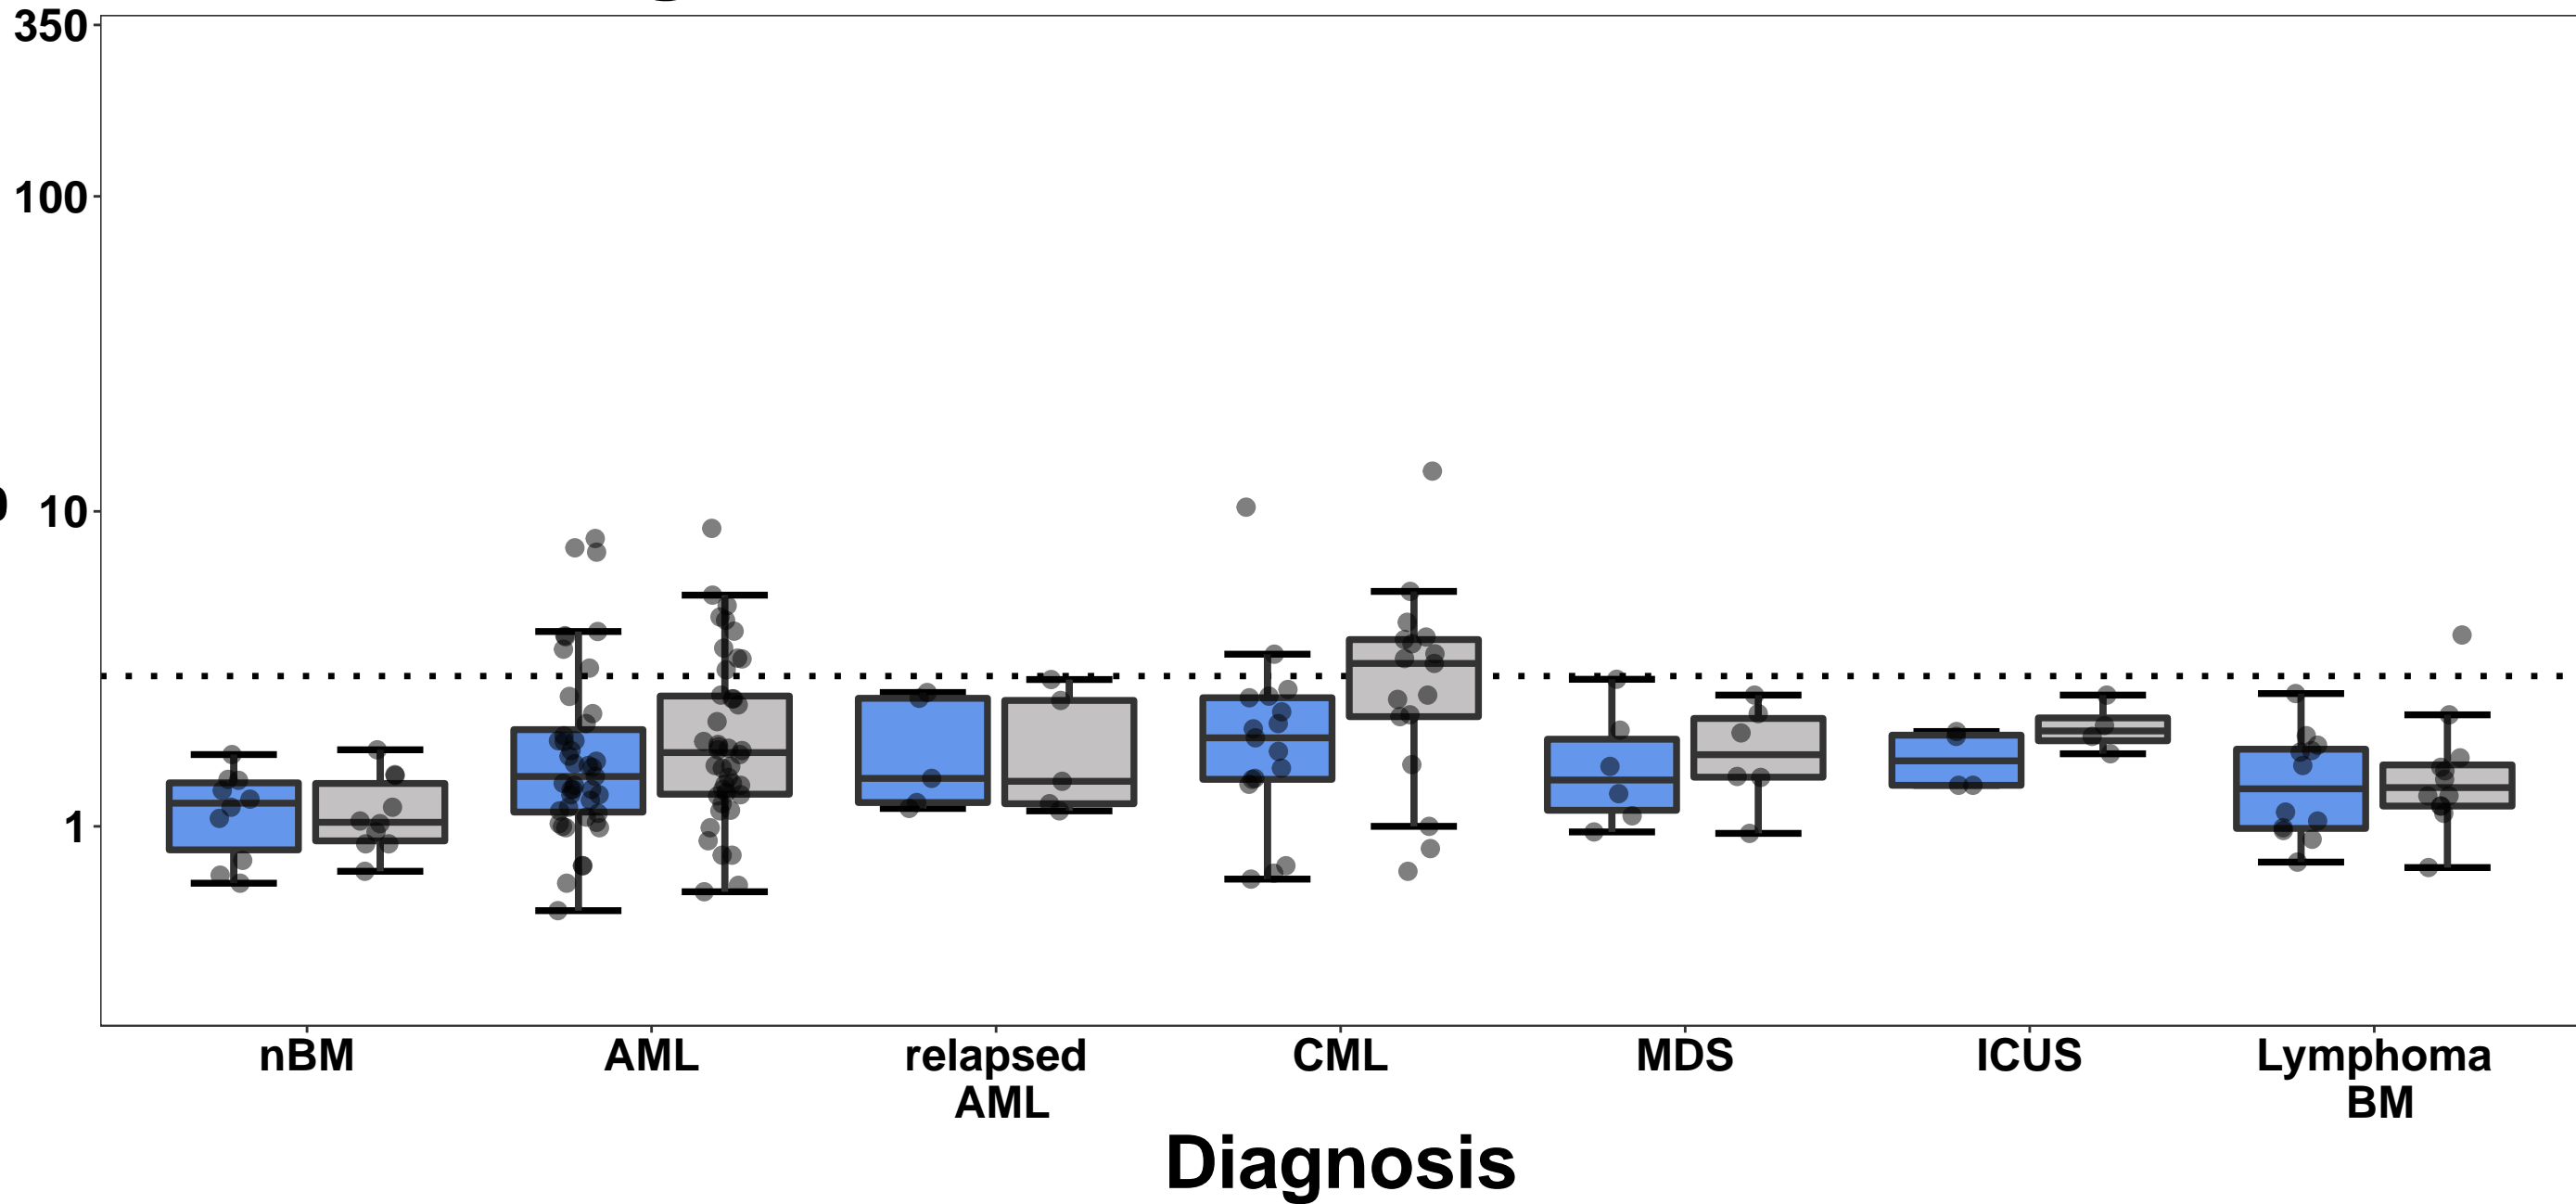

Cell fraction  CD34+/CD38-  CD34+/CD38+

# CD29 percentage

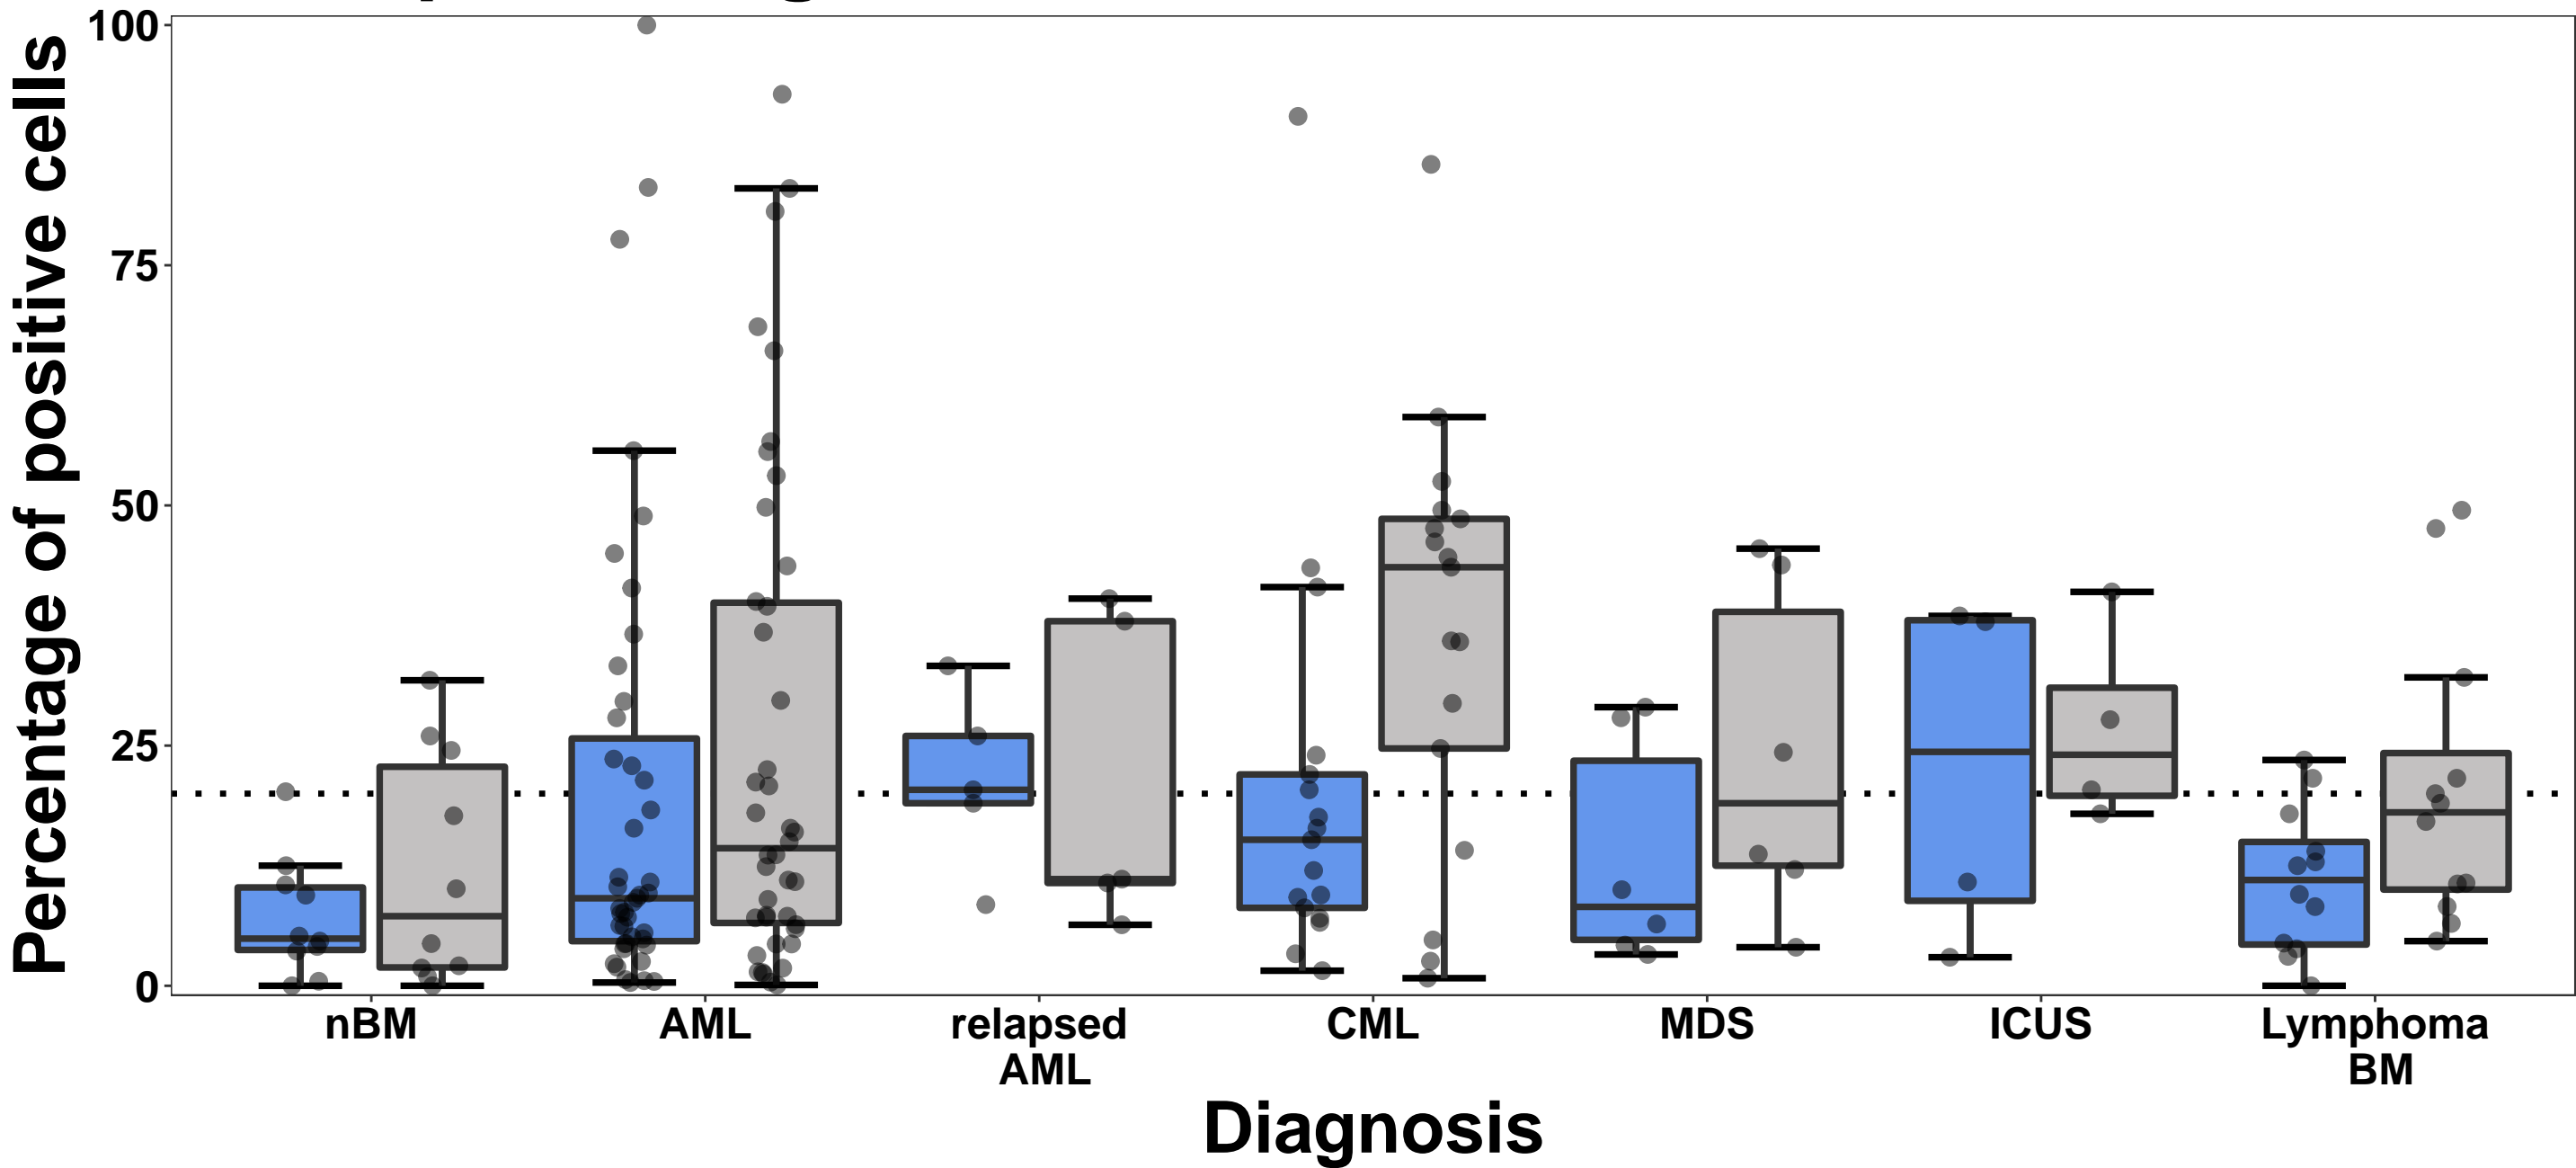

Cell fraction  CD34+/CD38-  CD34+/CD38+

# CD30 staining index

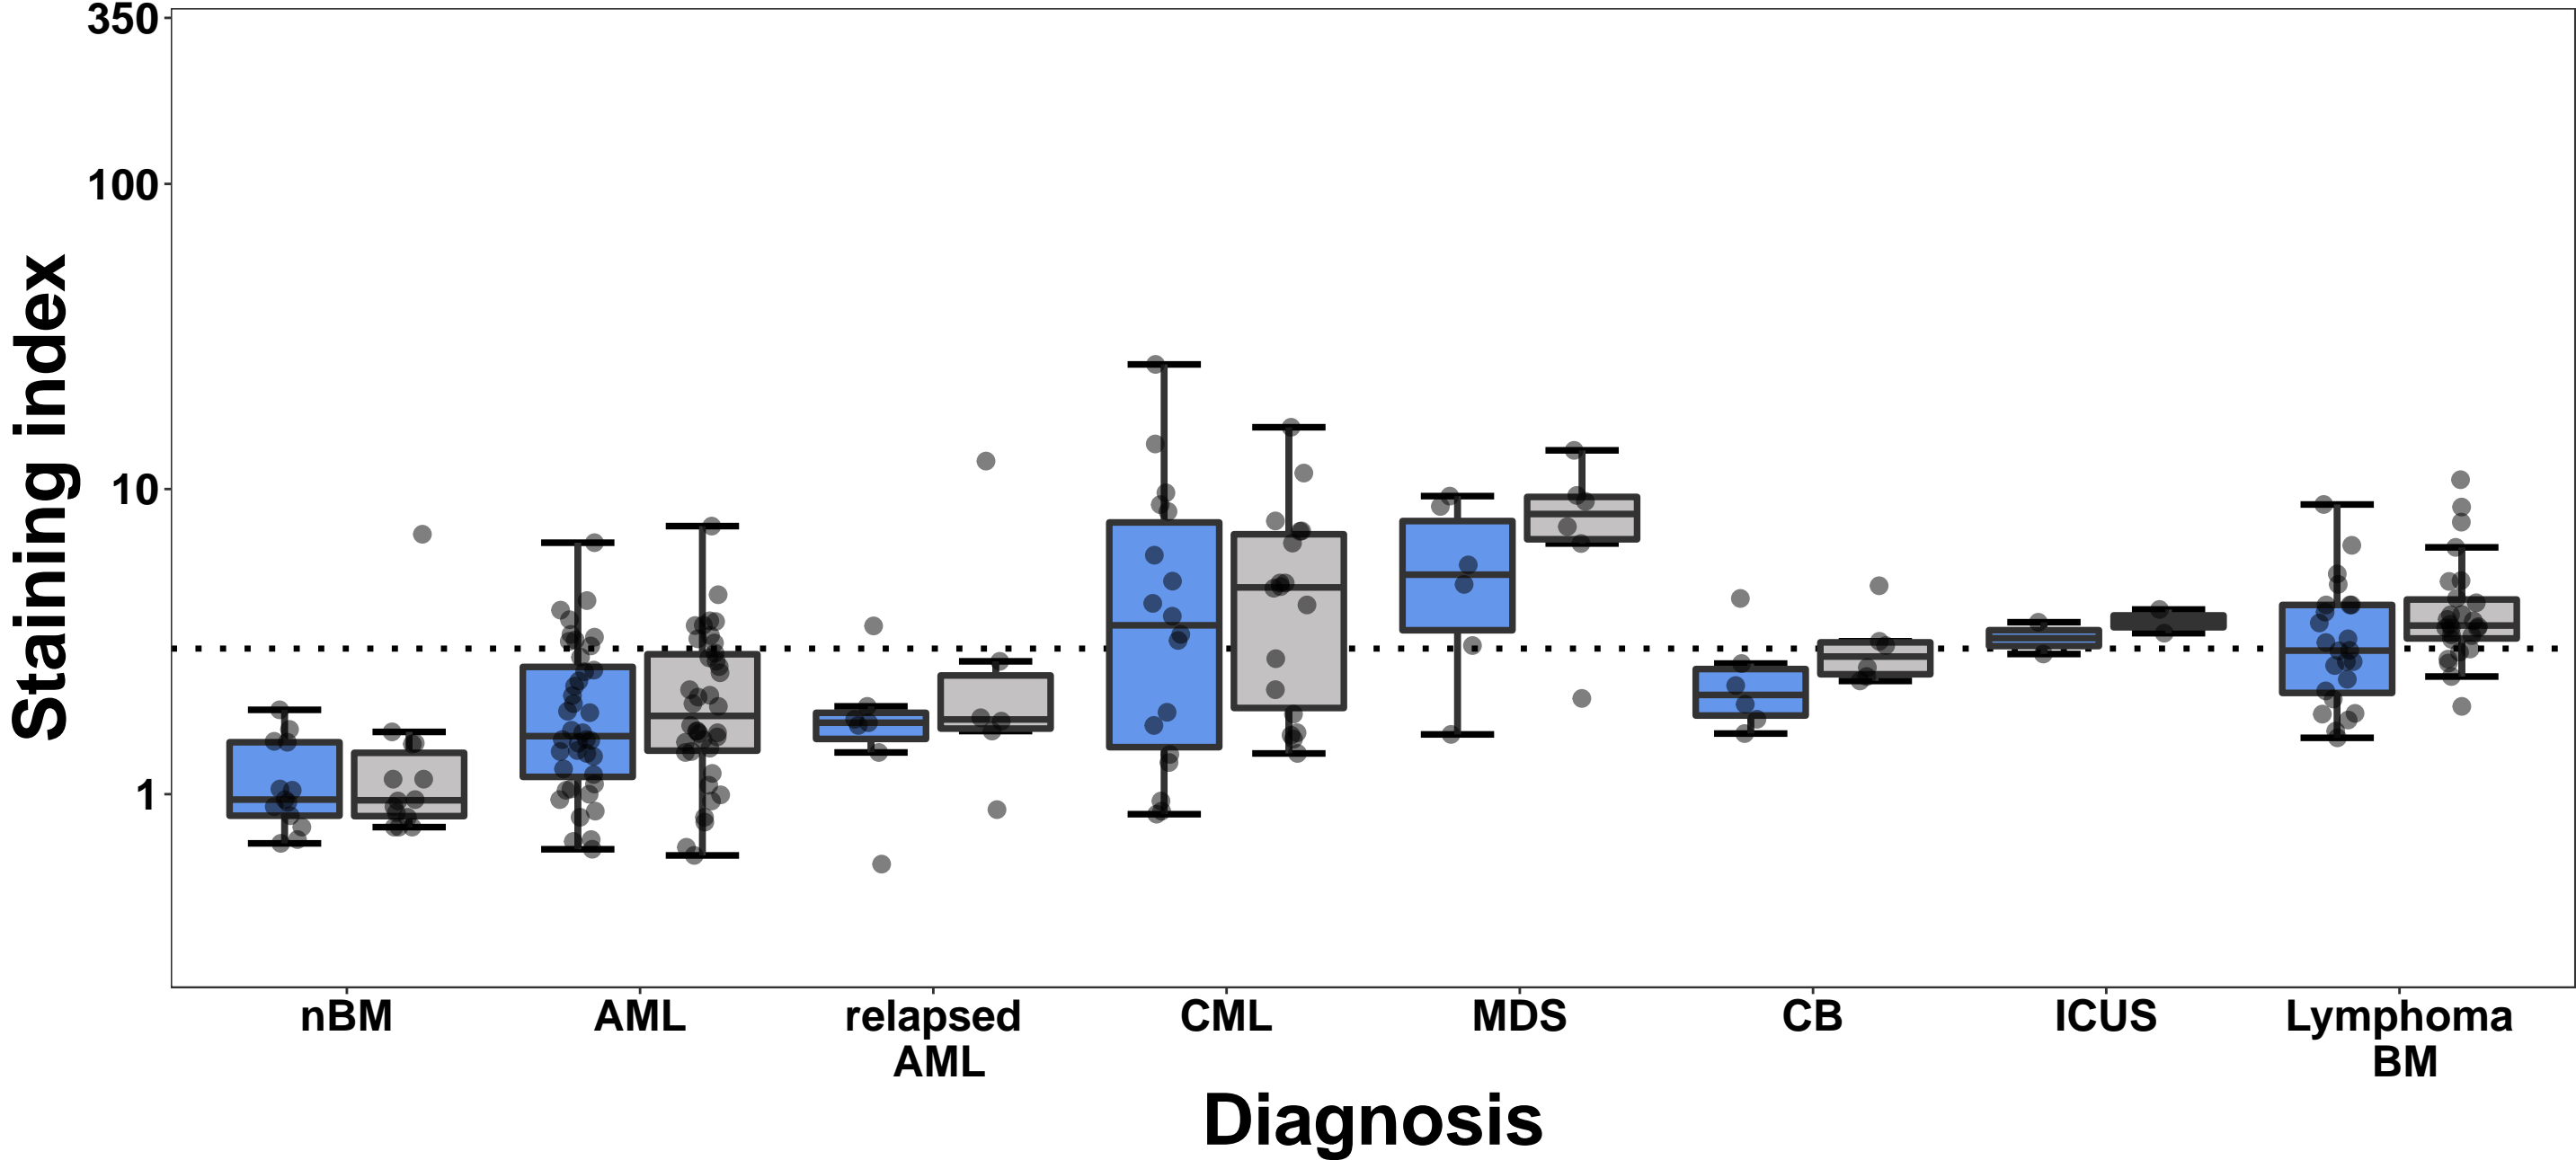

Cell fraction  CD34+/CD38-  CD34+/CD38+

# CD30 percentage

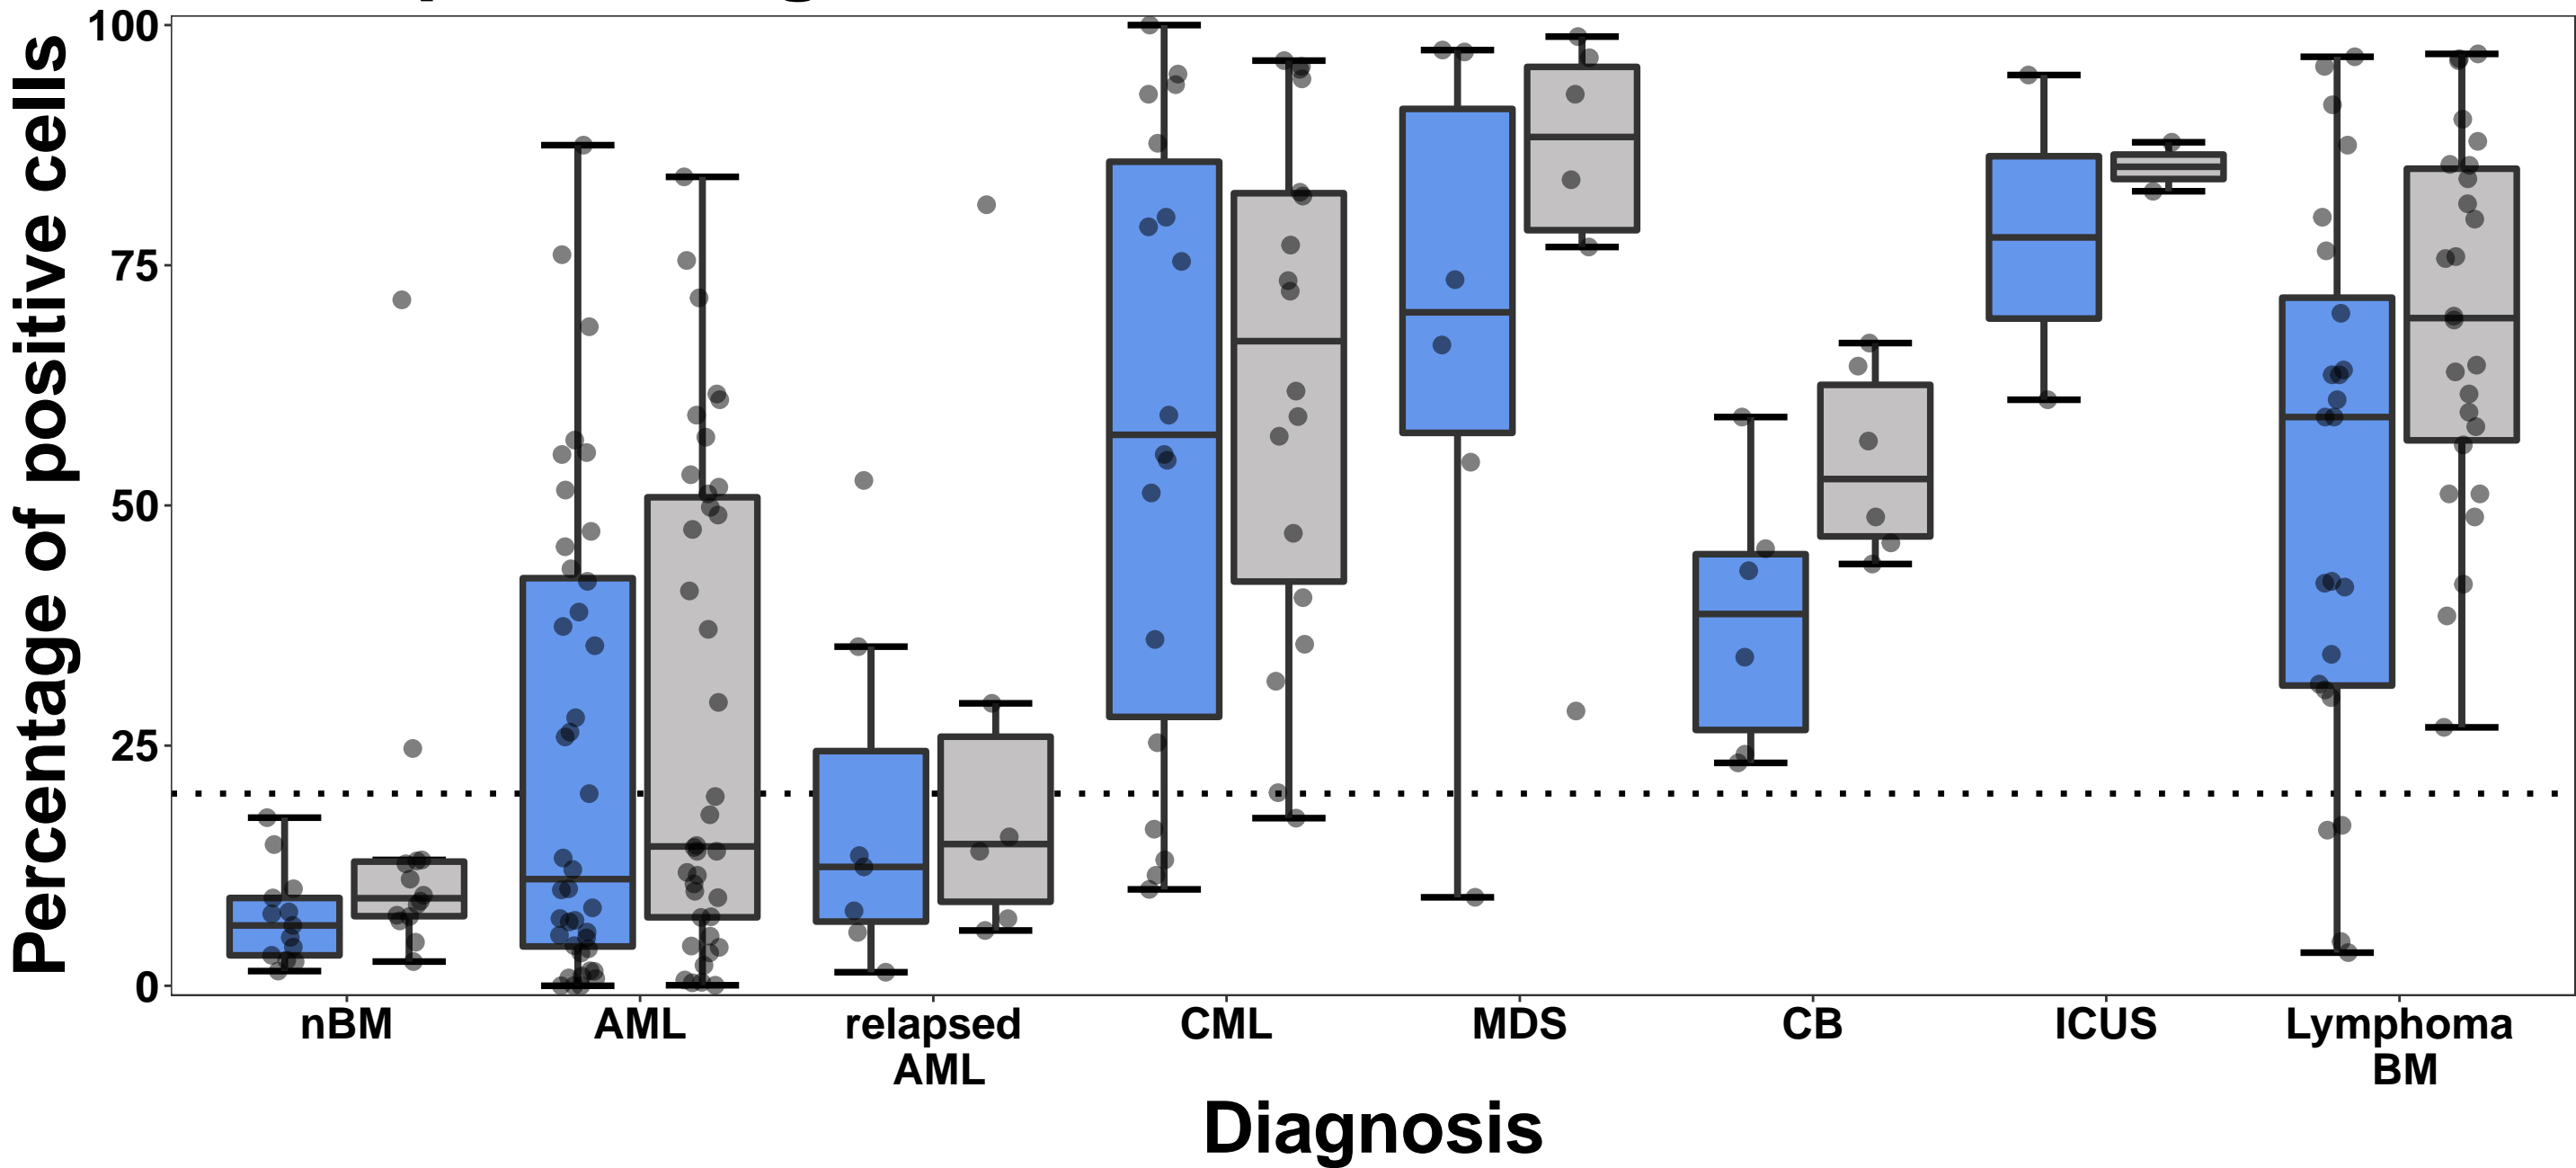

Cell fraction  CD34+/CD38-  CD34+/CD38+

# CD33 staining index

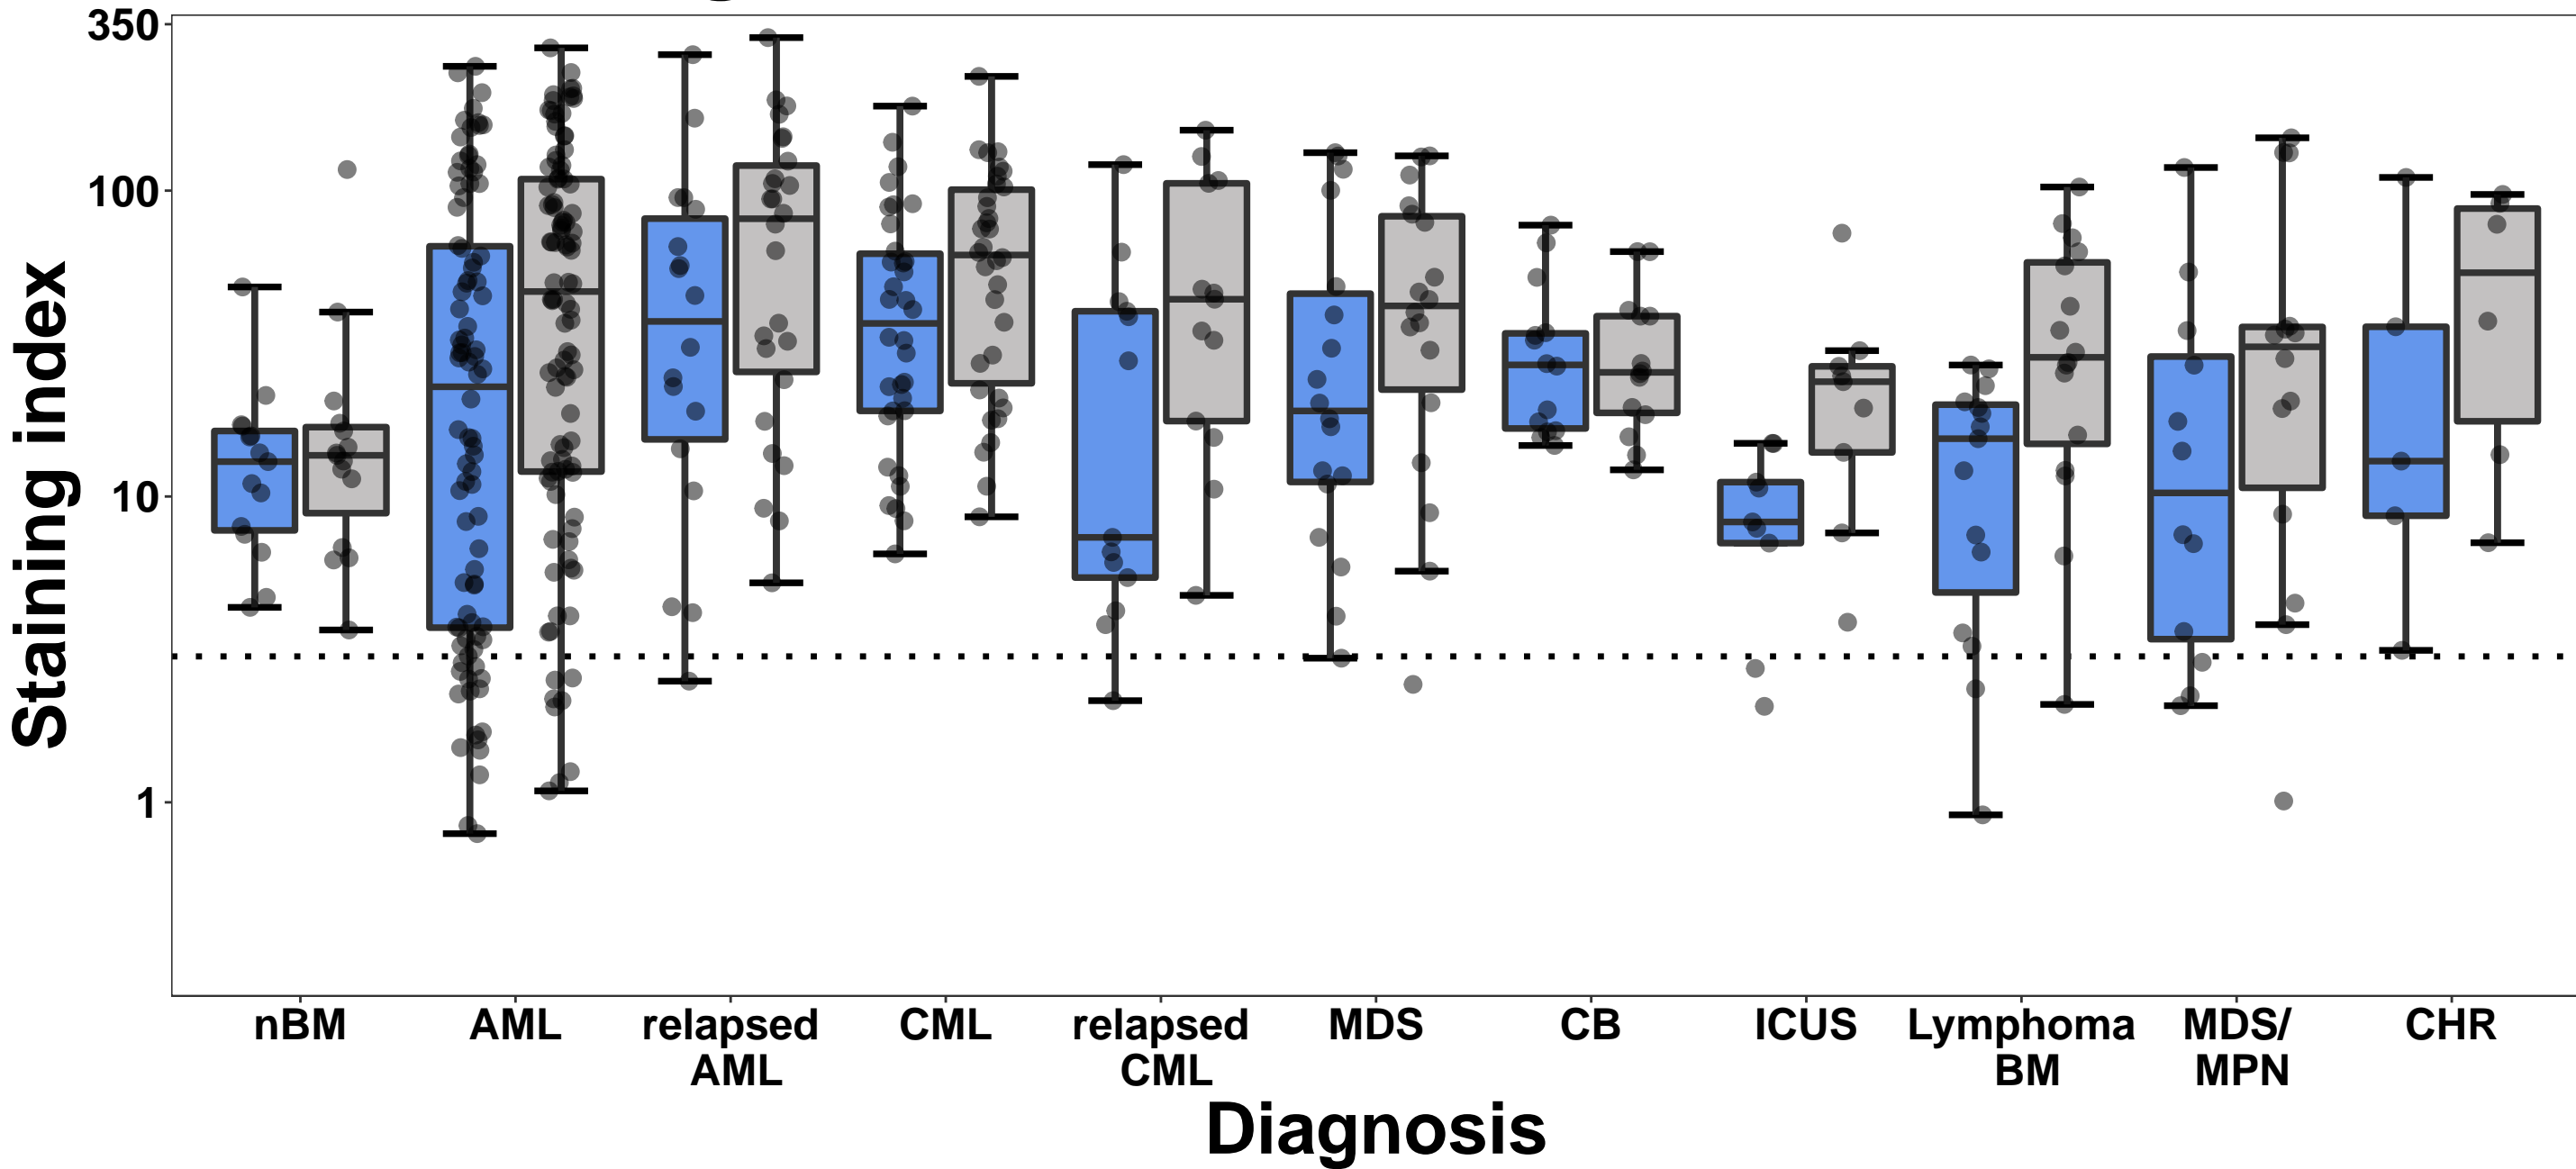



Cell fraction  CD34+/CD38-  CD34+/CD38+

# CD33 percentage

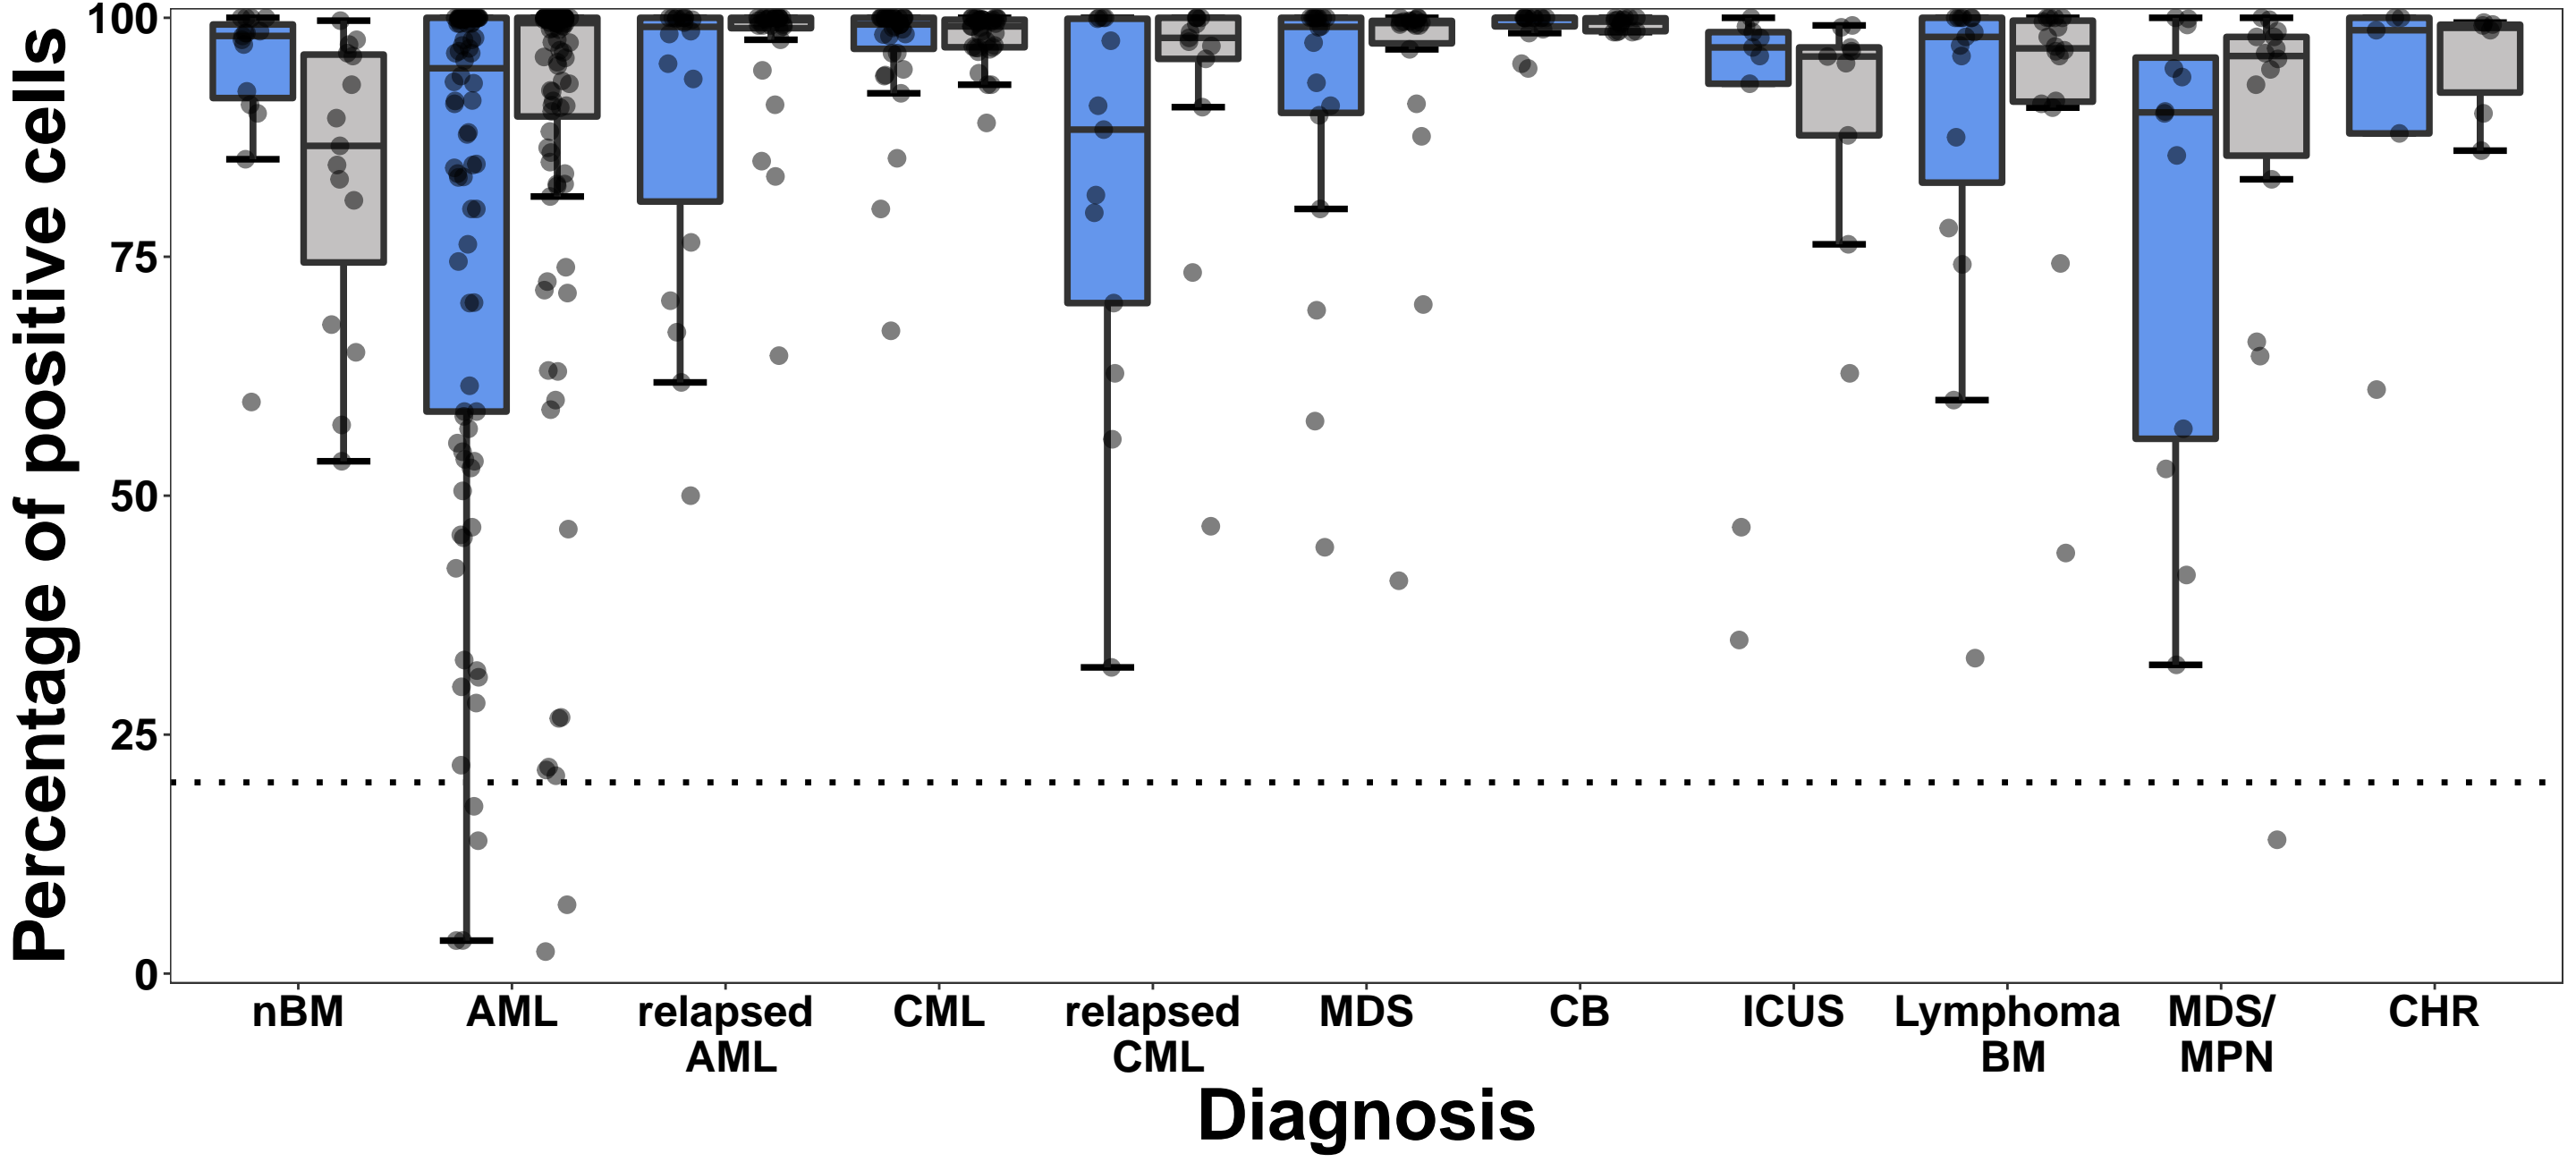

Cell fraction  CD34+/CD38-  CD34+/CD38+

# CD36 staining index

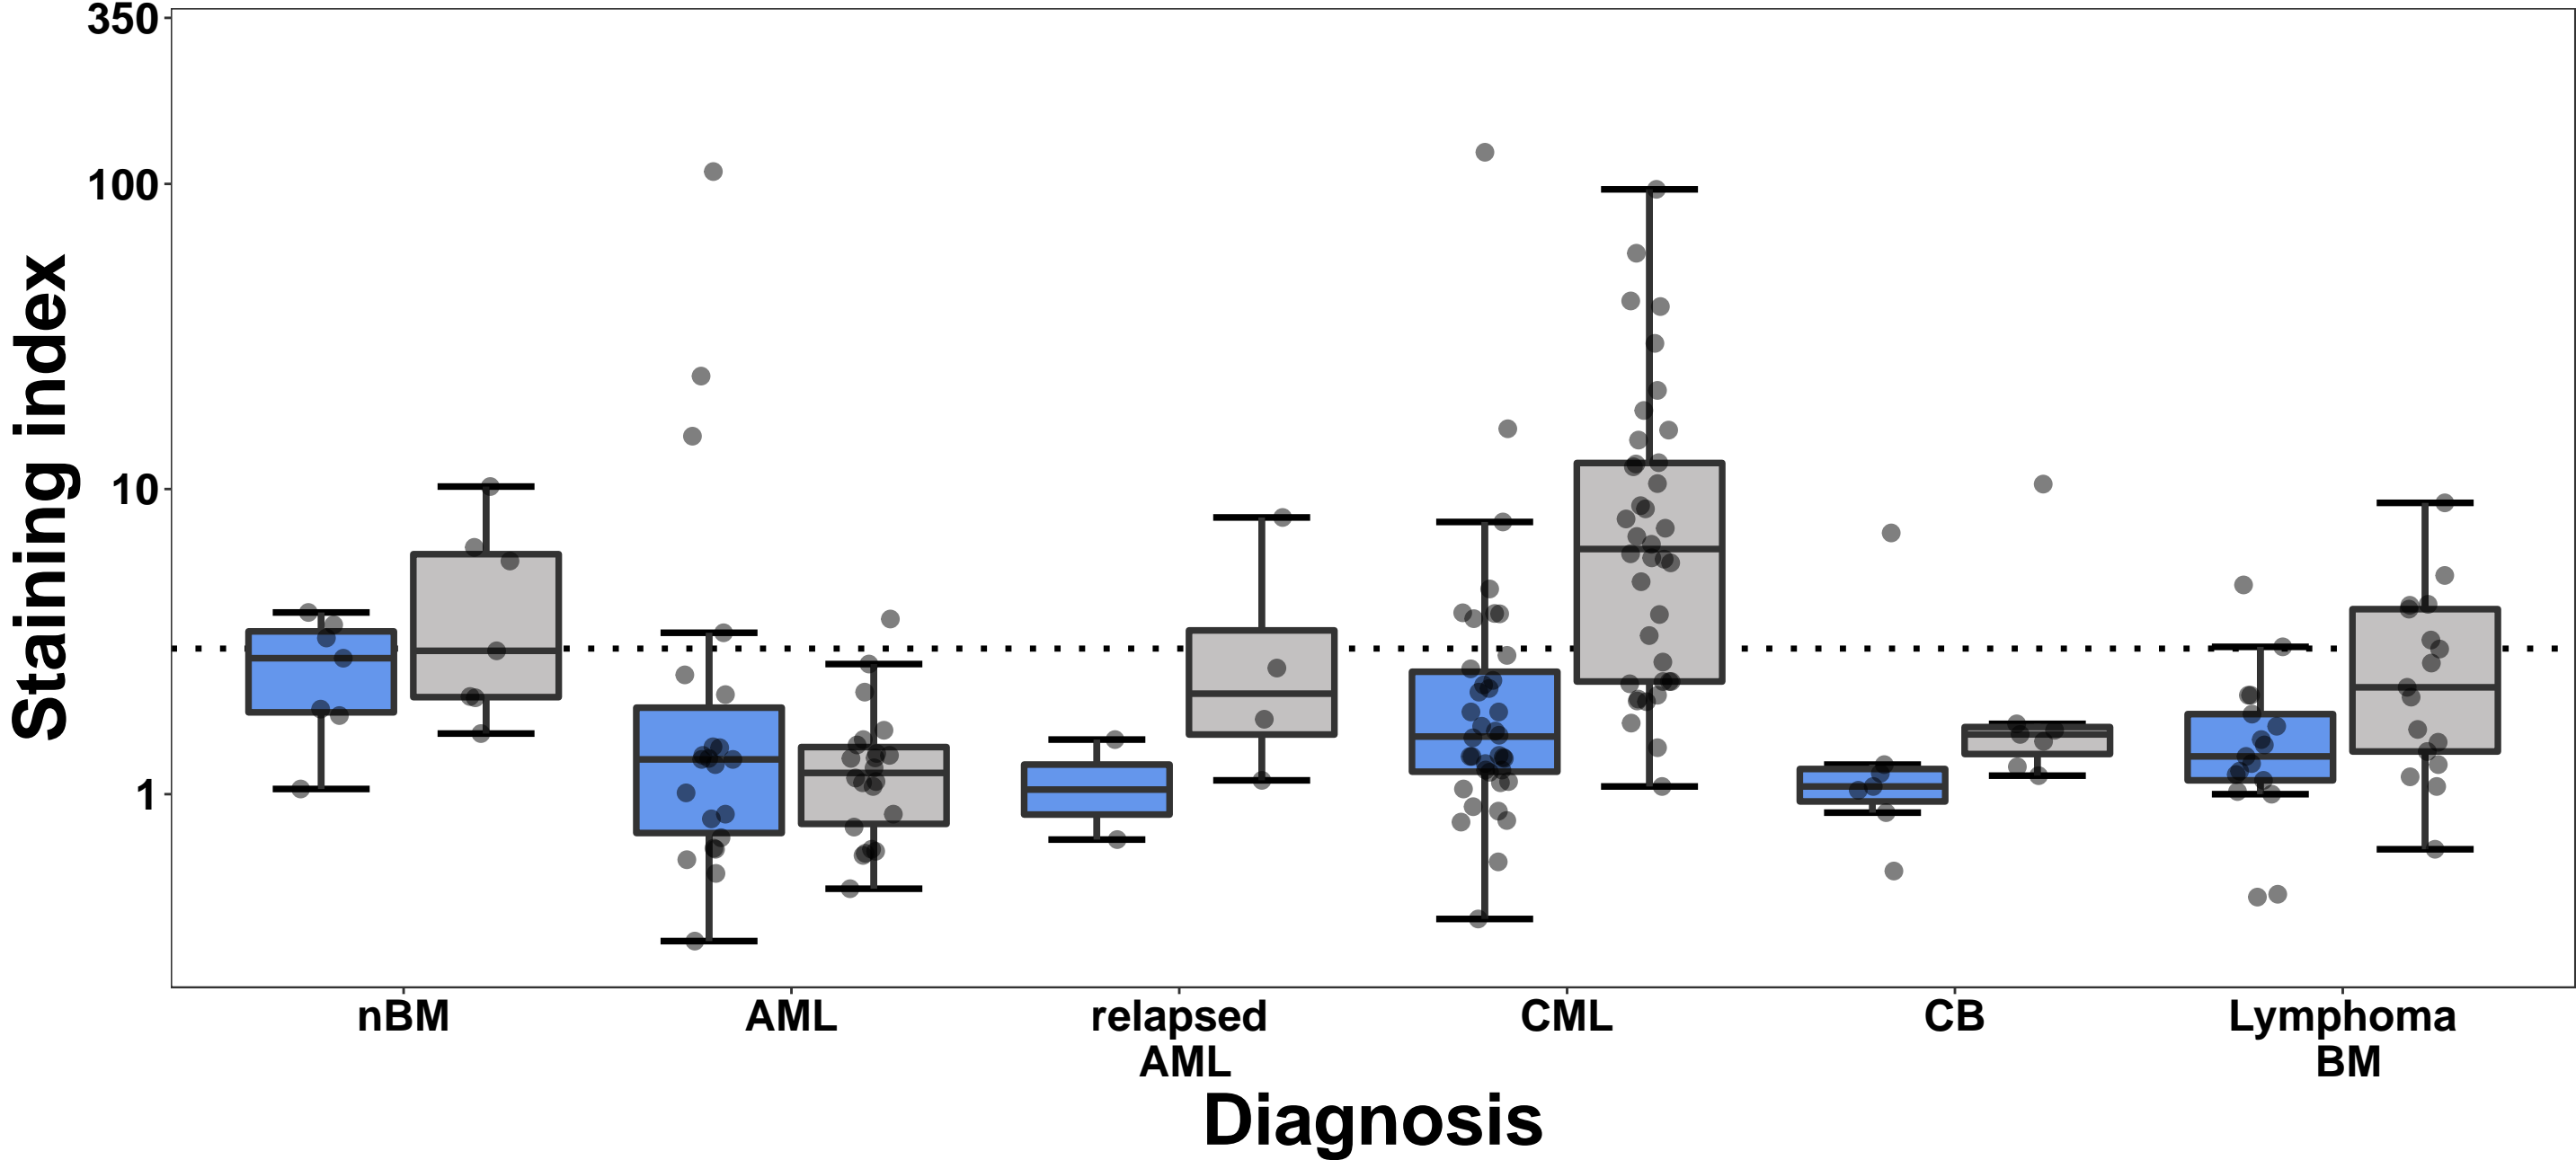

Cell fraction  CD34+/CD38-  CD34+/CD38+

# CD36 percentage

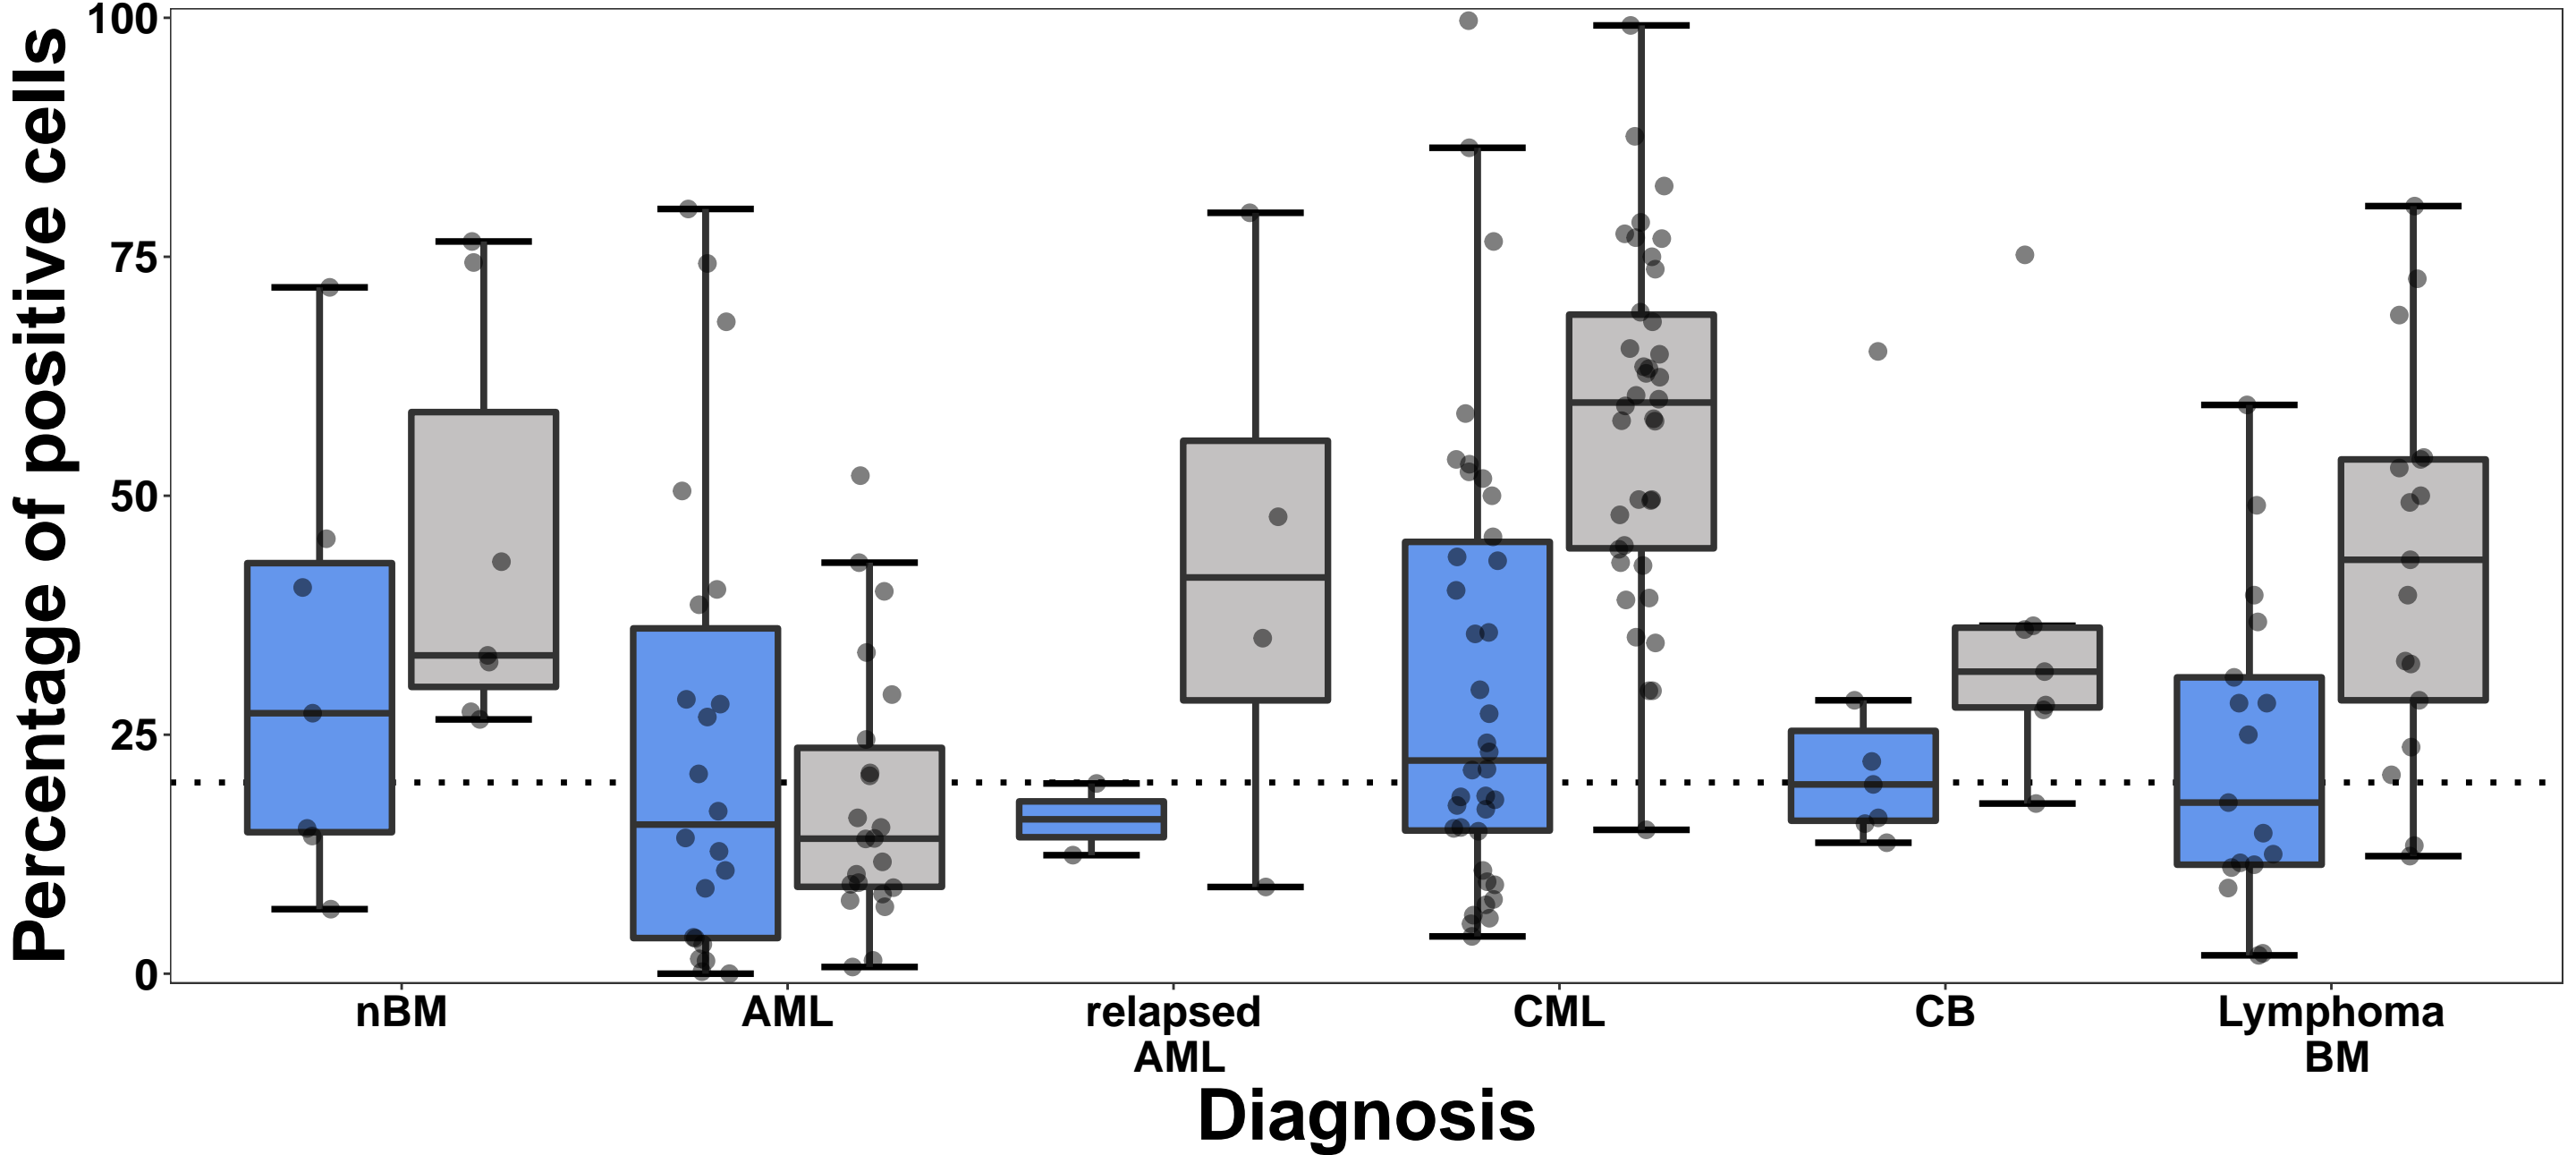

Cell fraction  CD34+/CD38-  CD34+/CD38+

# CD41 staining index

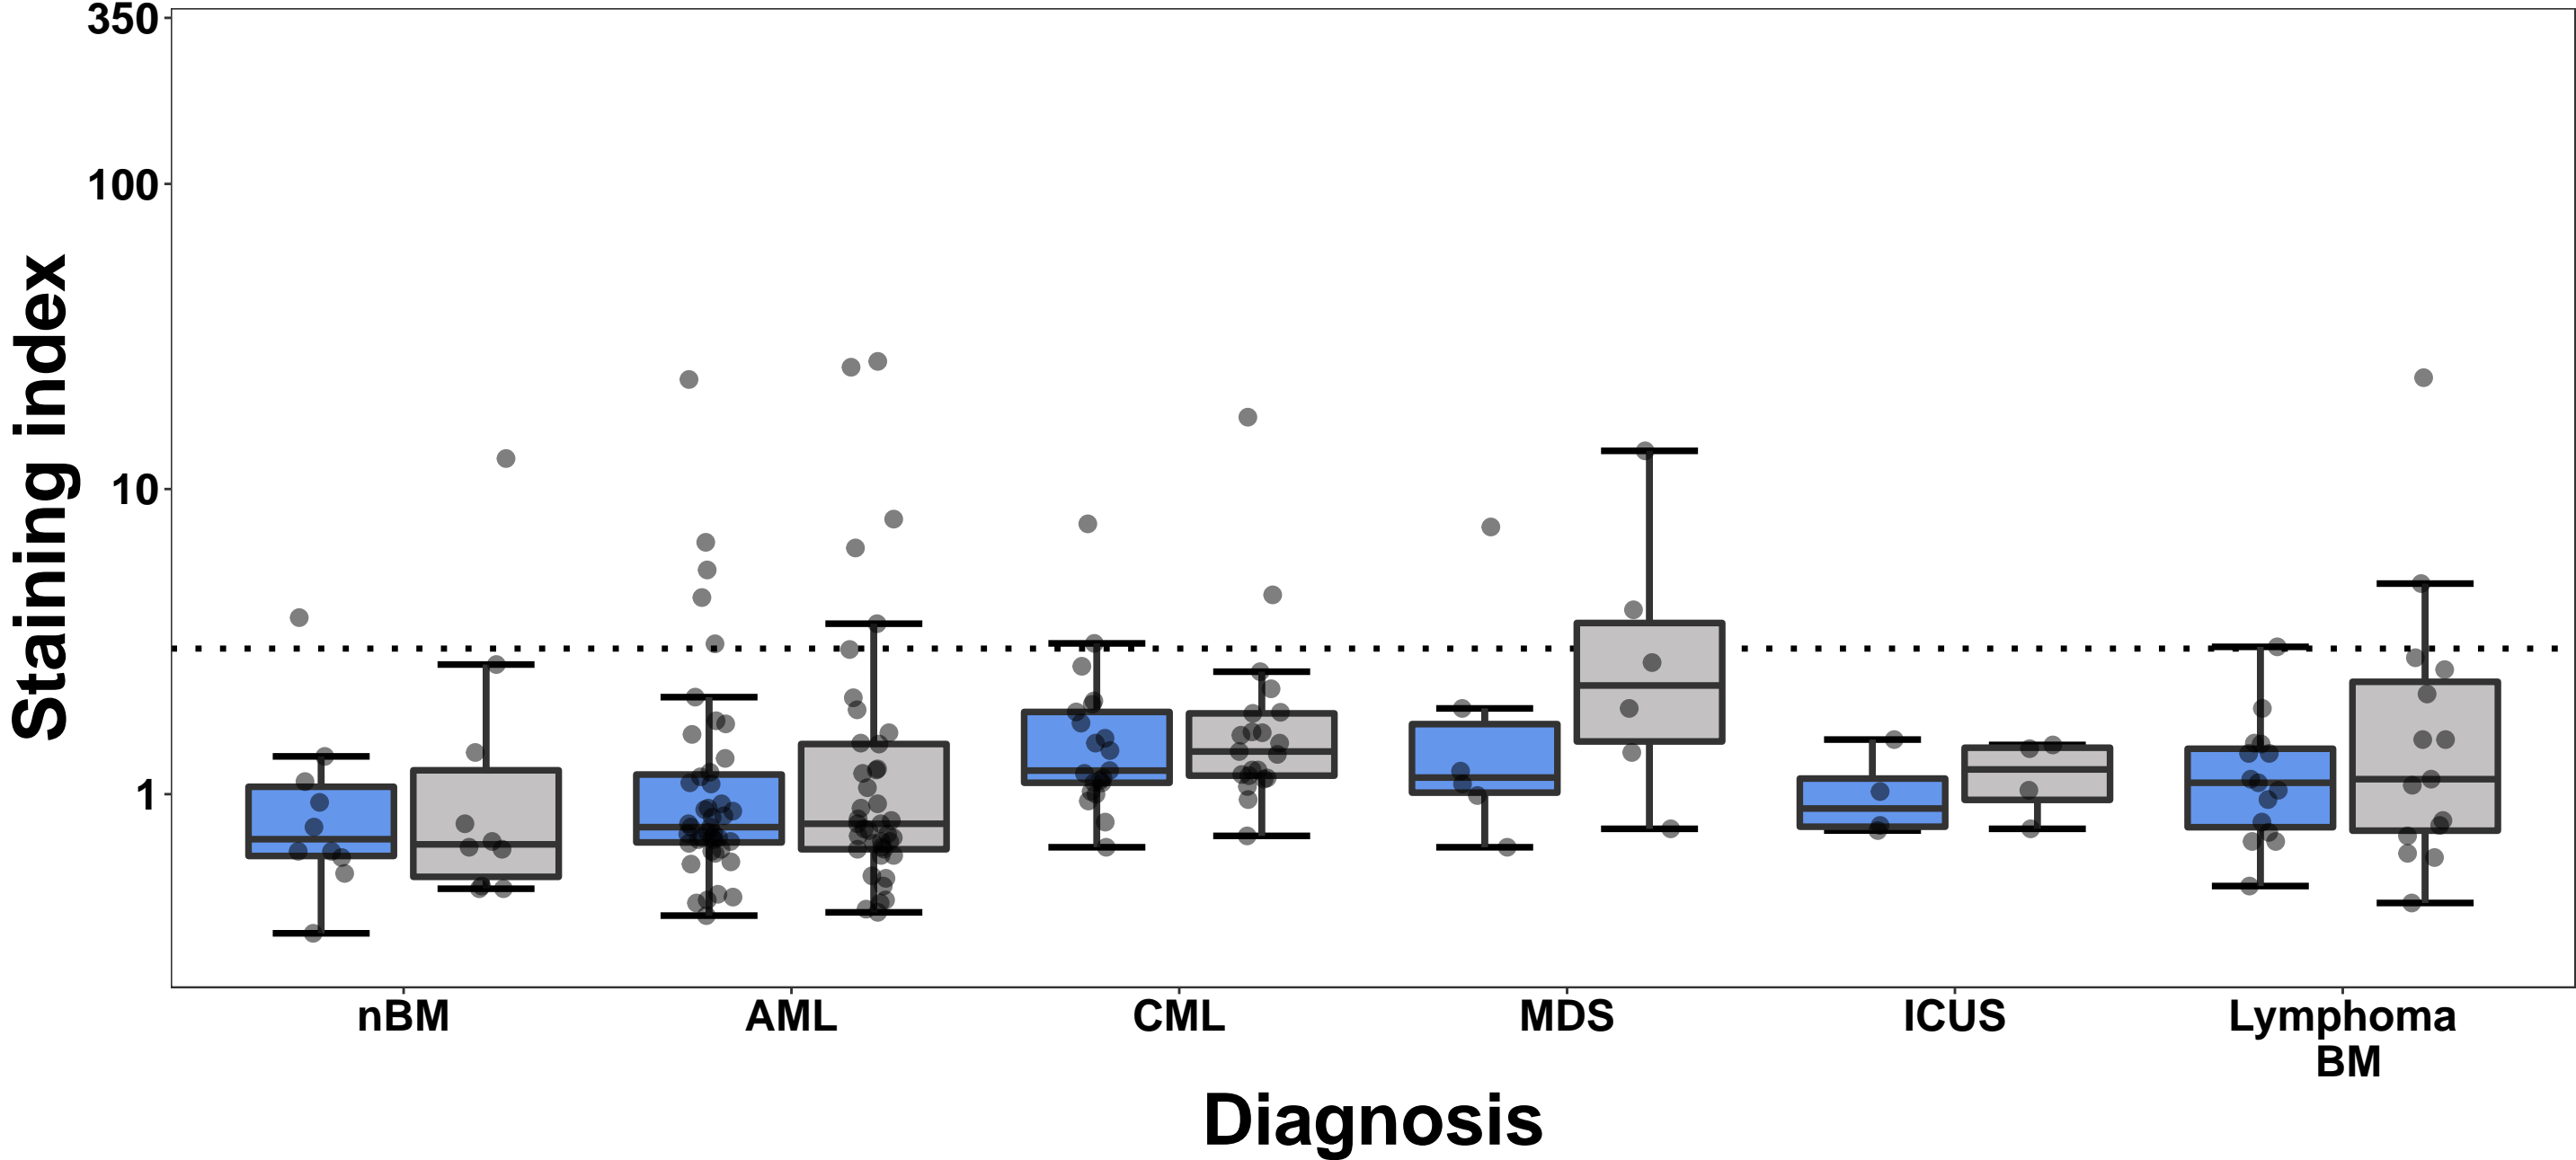

Cell fraction  CD34+/CD38-  CD34+/CD38+

# CD41 percentage

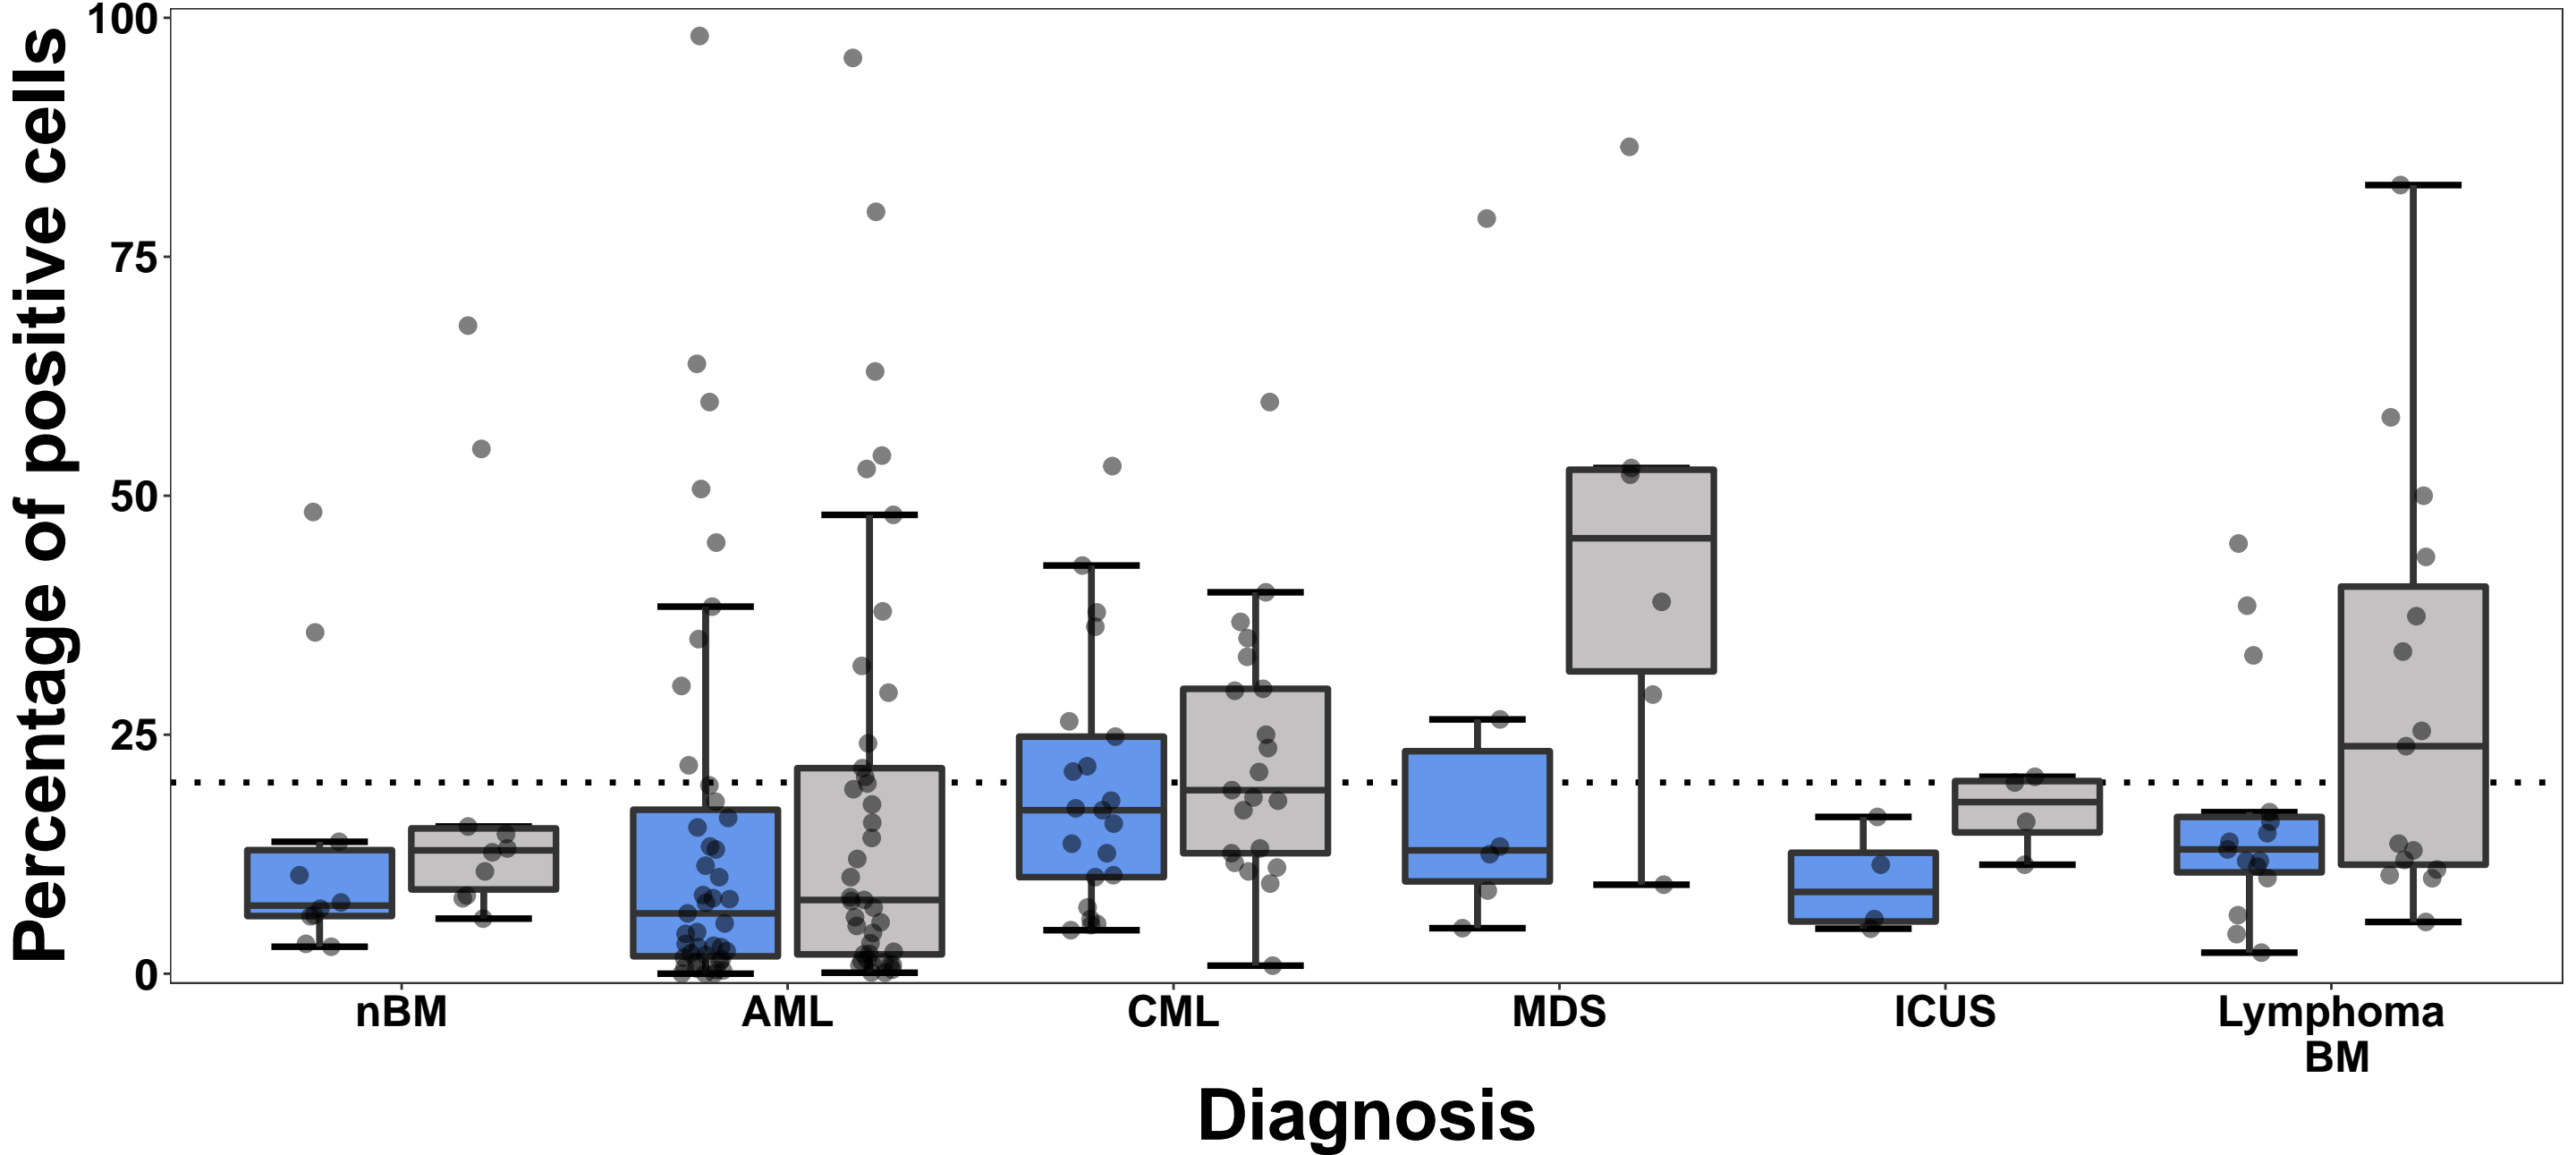

Cell fraction  CD34+/CD38-  CD34+/CD38+

# CD42b staining index

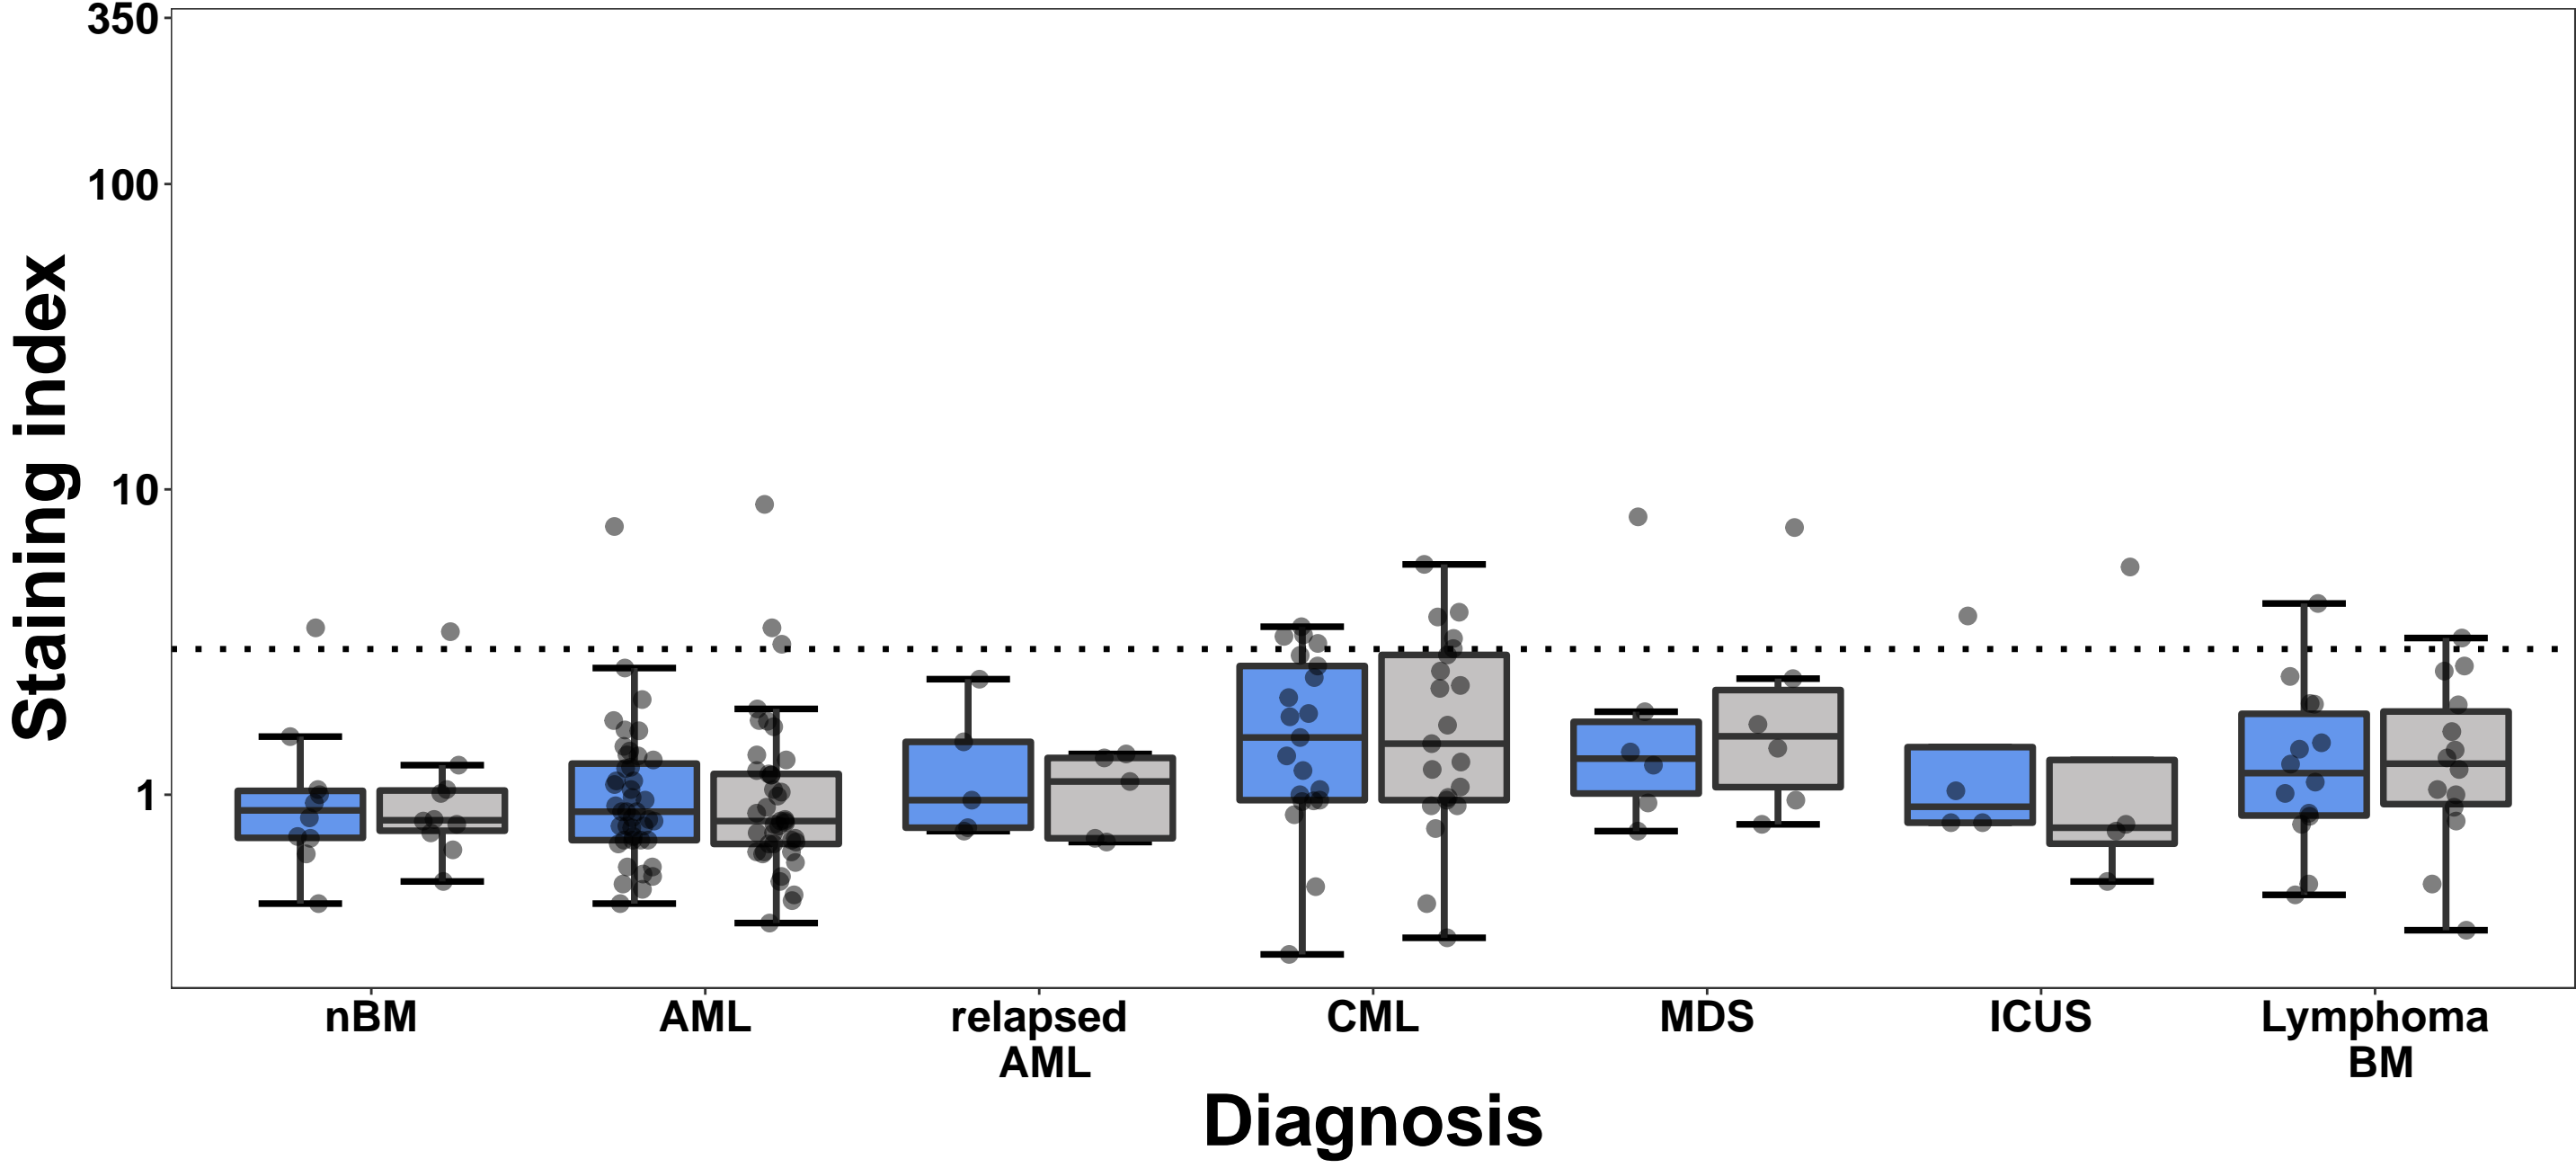

Cell fraction  CD34+/CD38-  CD34+/CD38+

# CD42b percentage

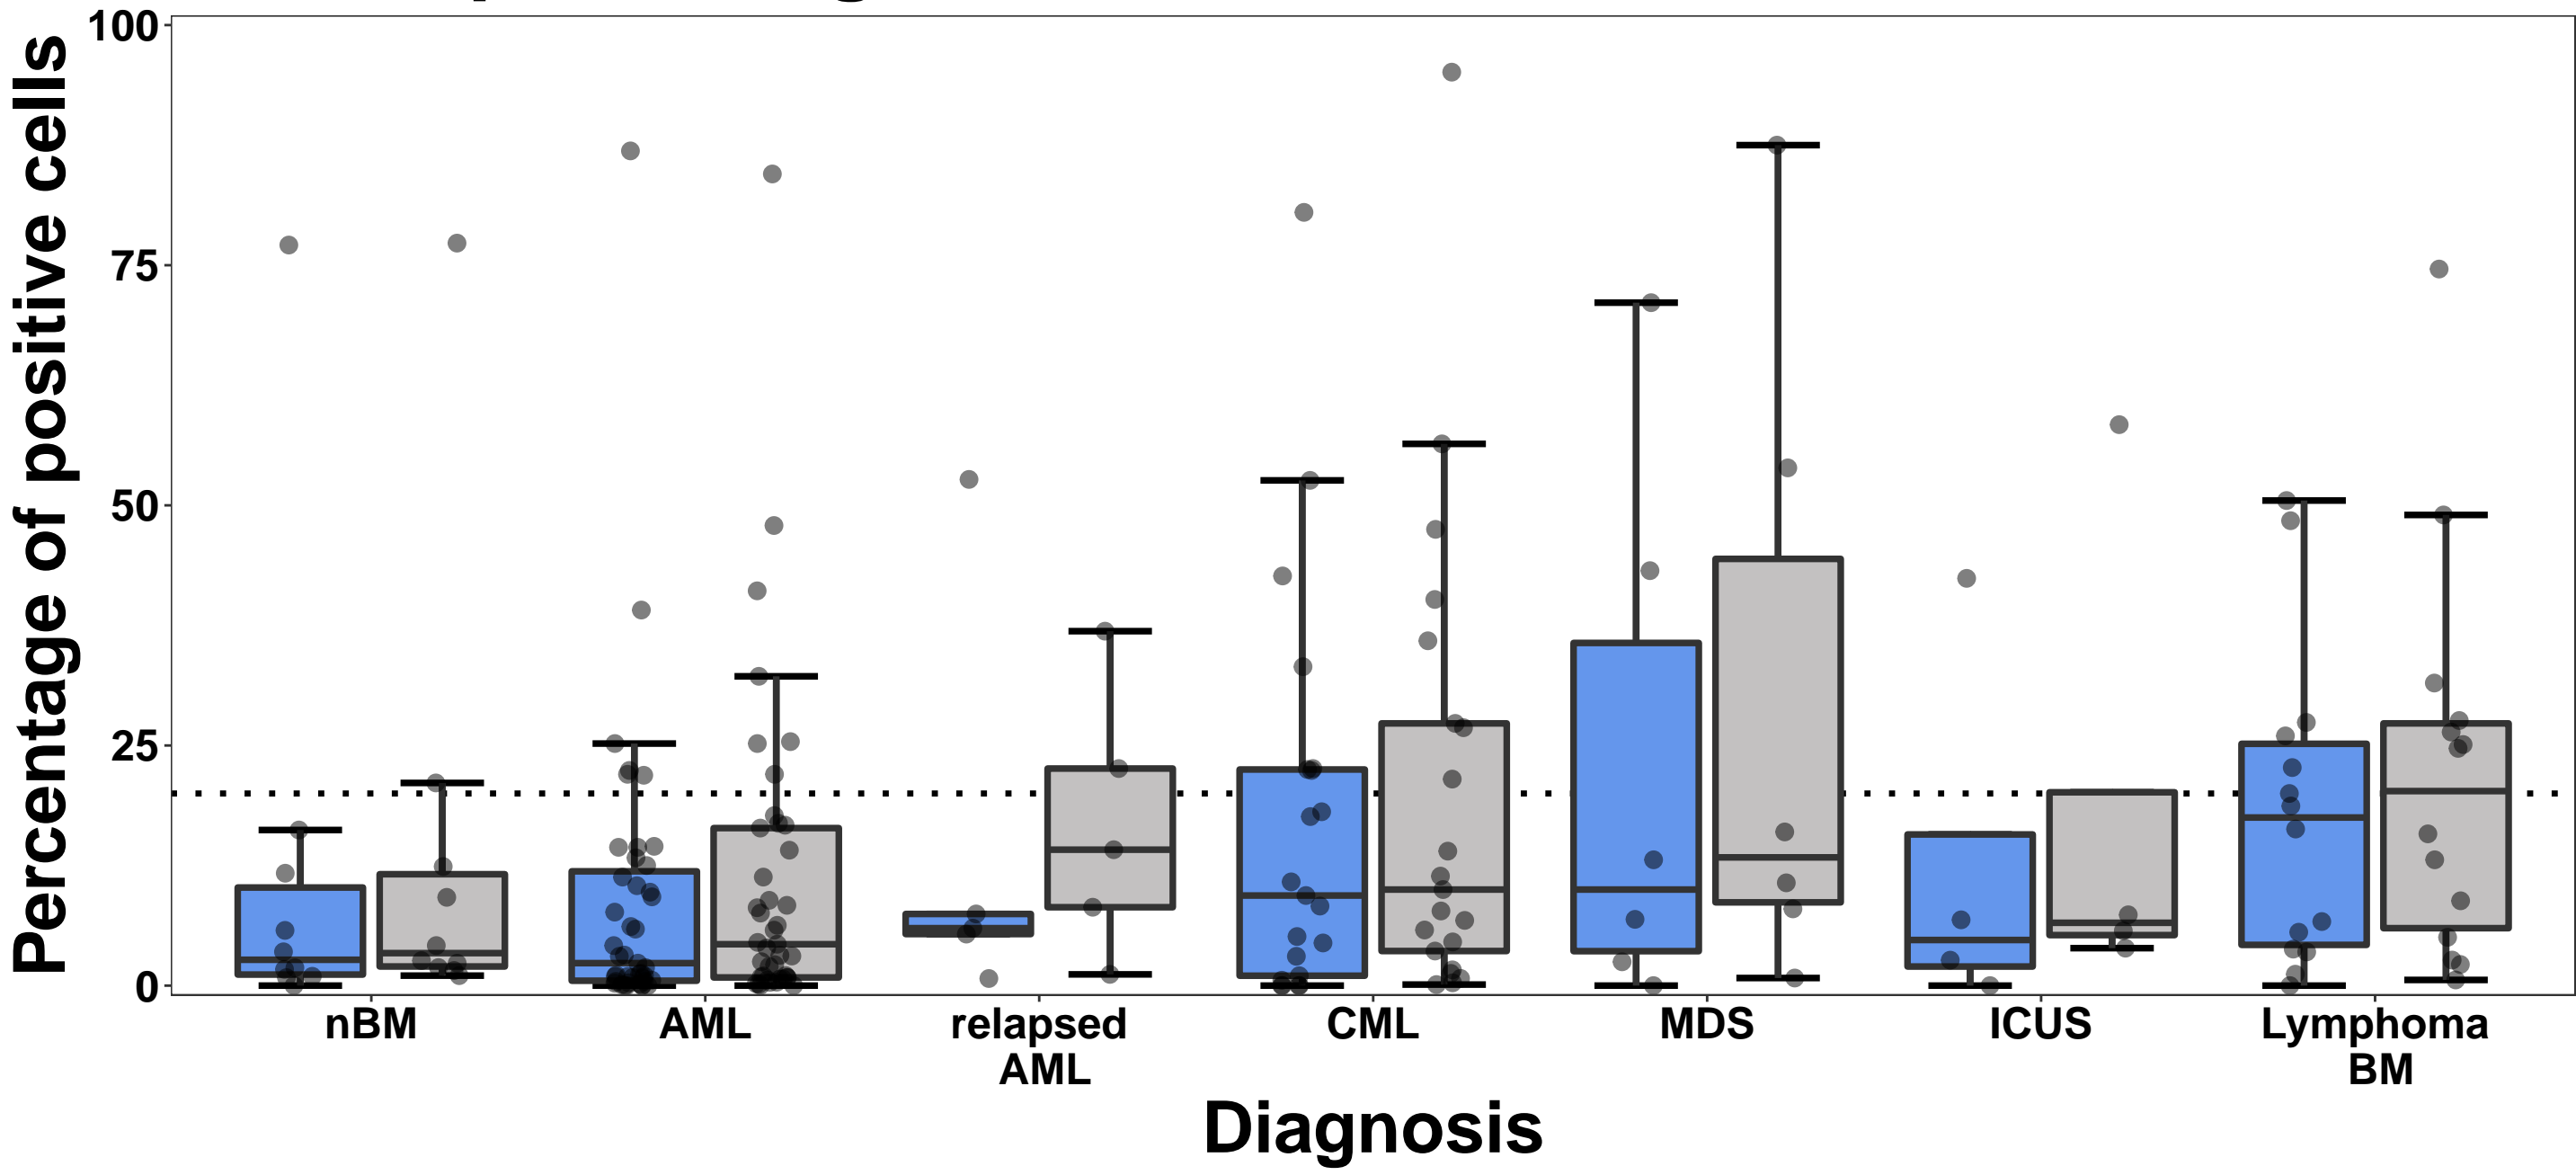

# CD43 staining index

Cell fraction  CD34+/CD38-  CD34+/CD38+

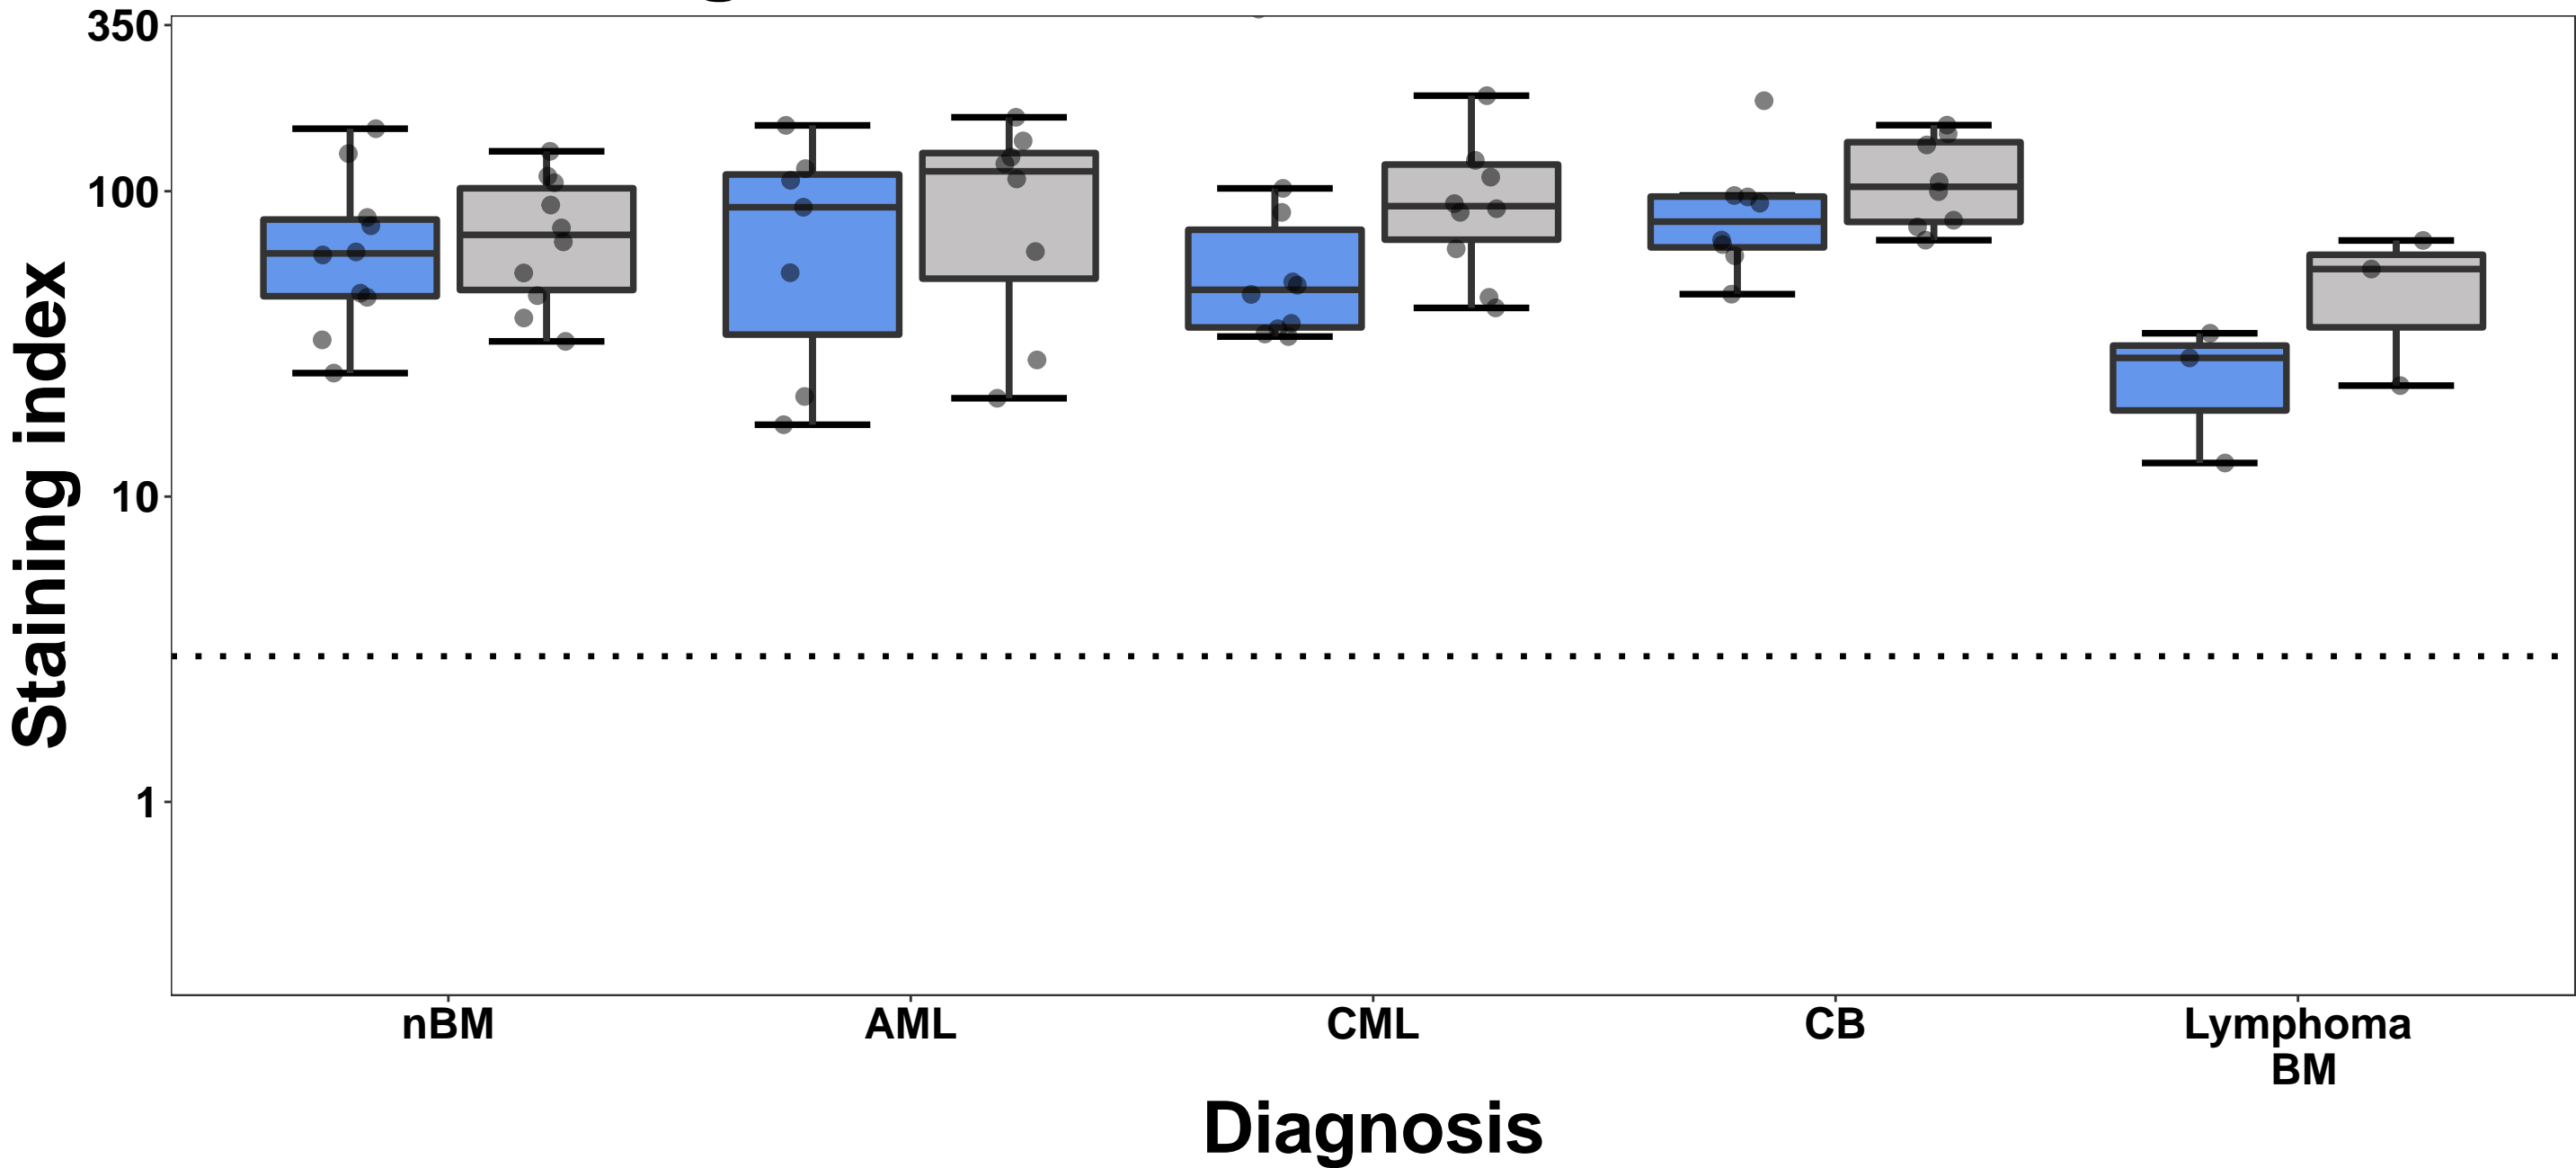



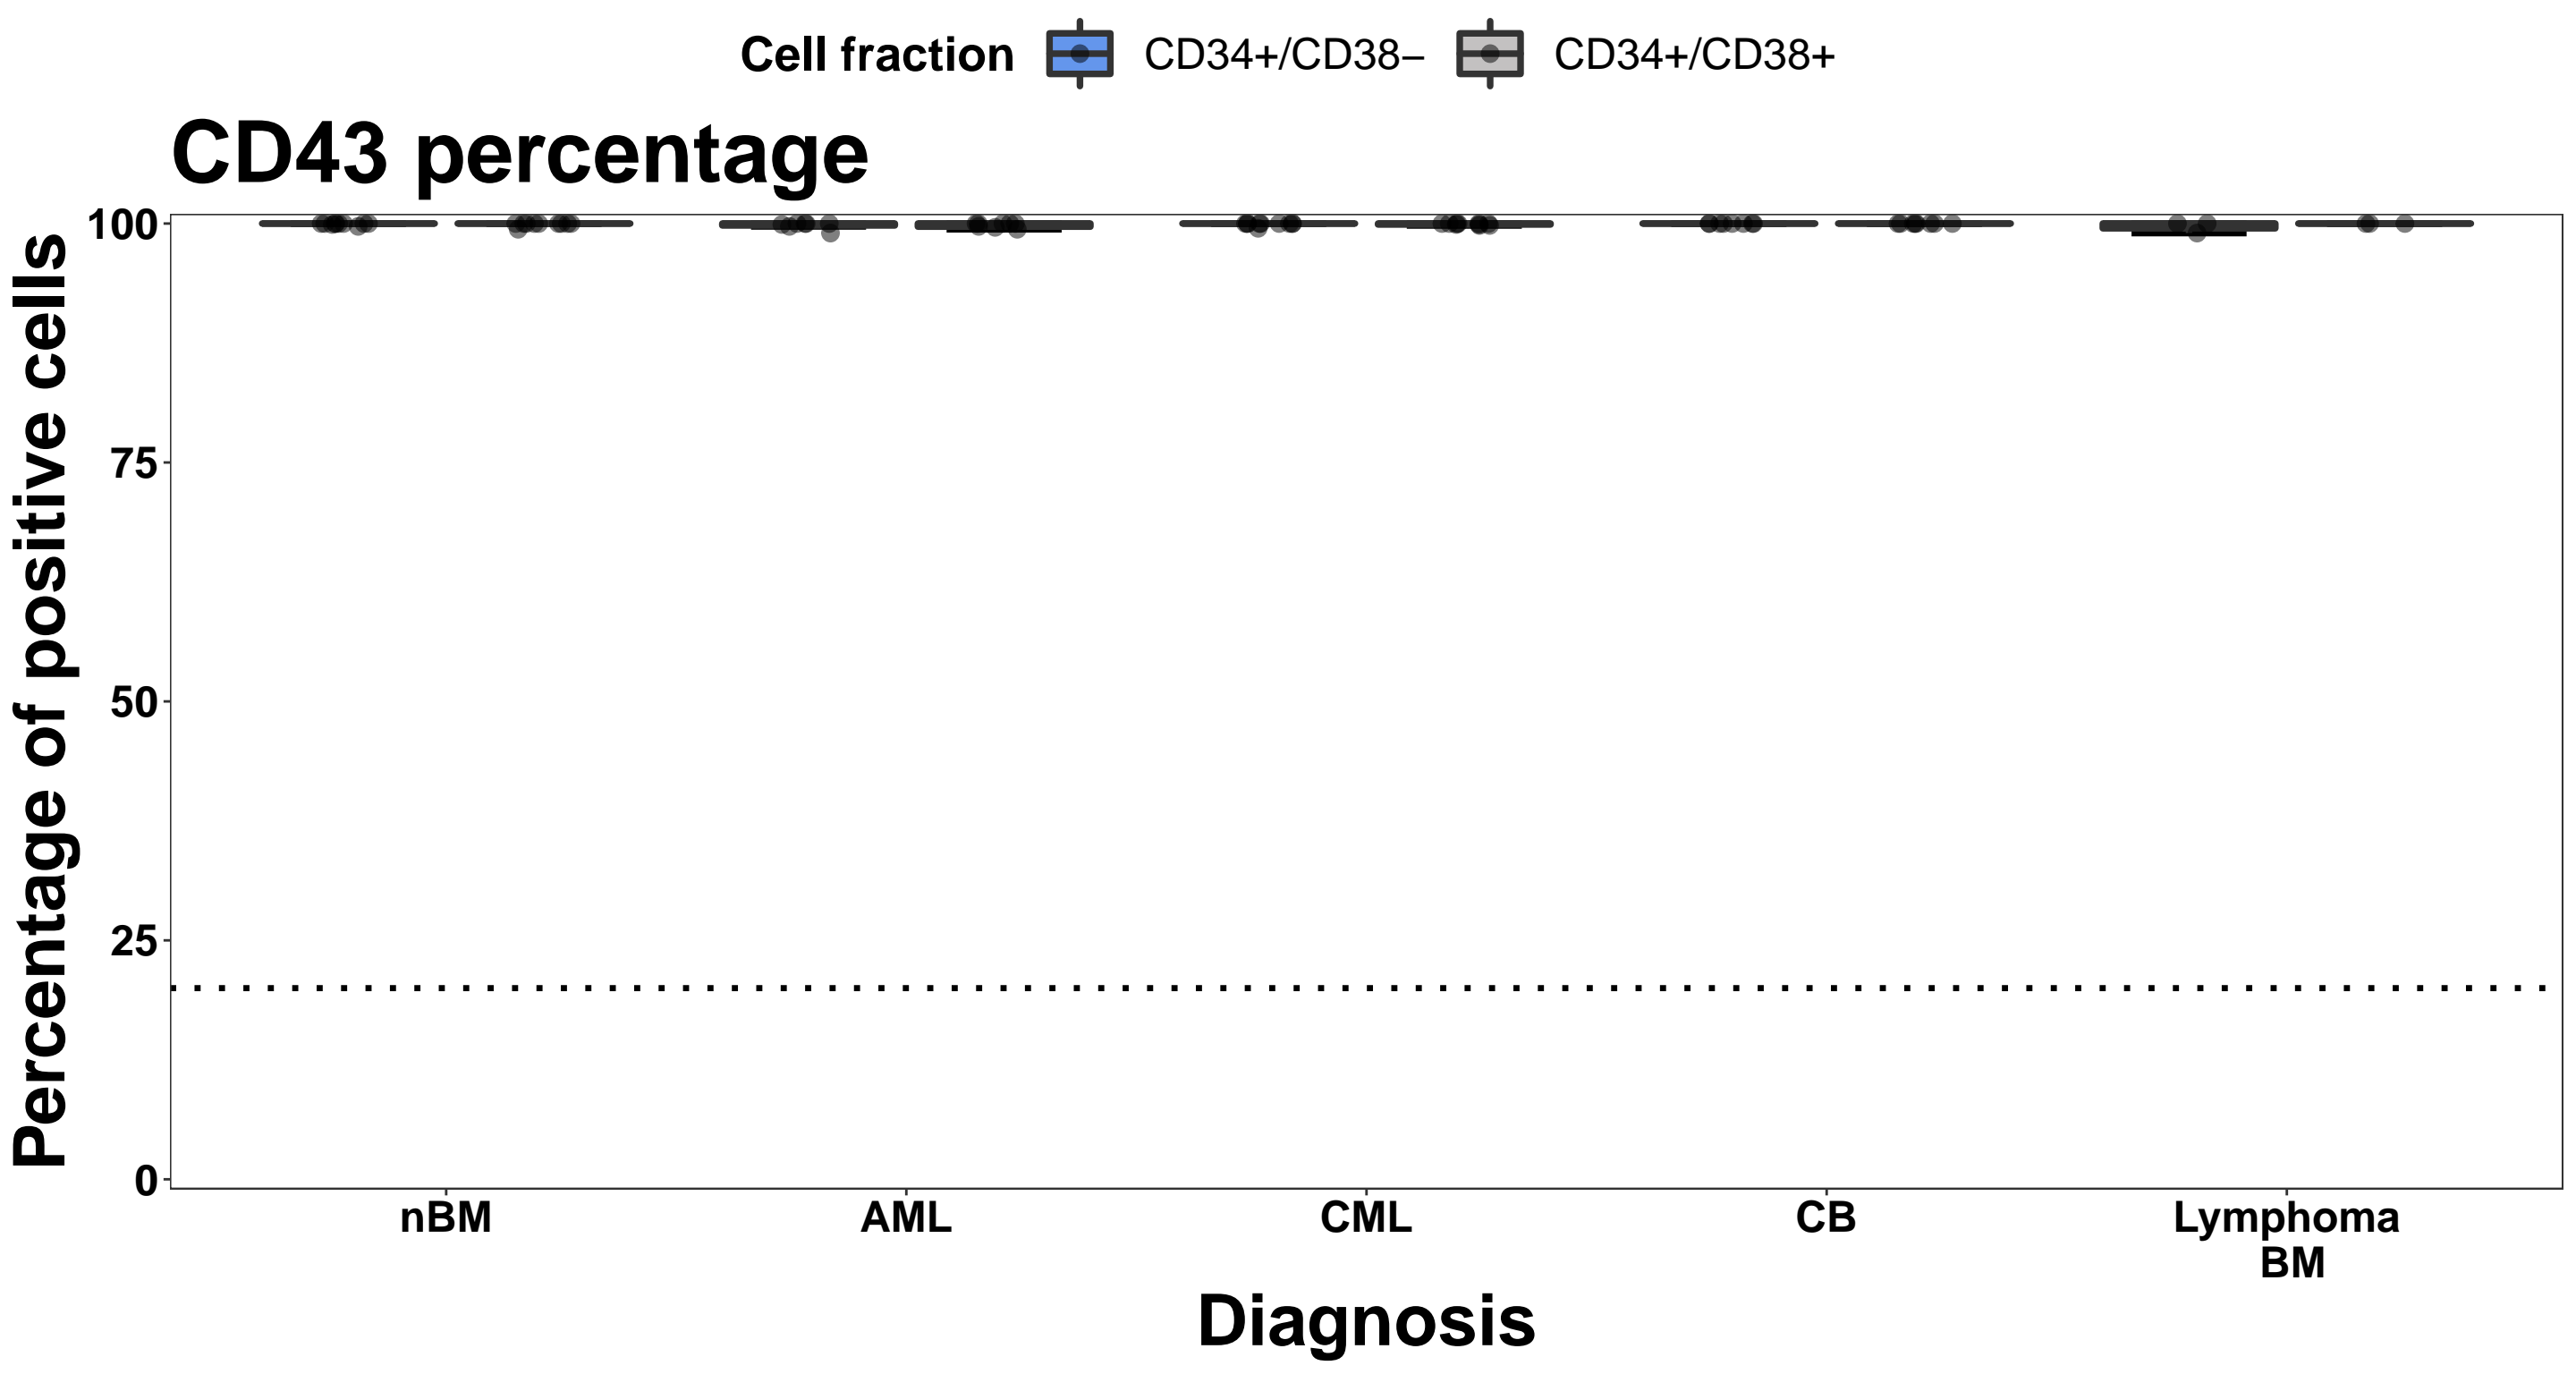

Cell fraction  CD34+/CD38-  CD34+/CD38+

# CD44 staining index

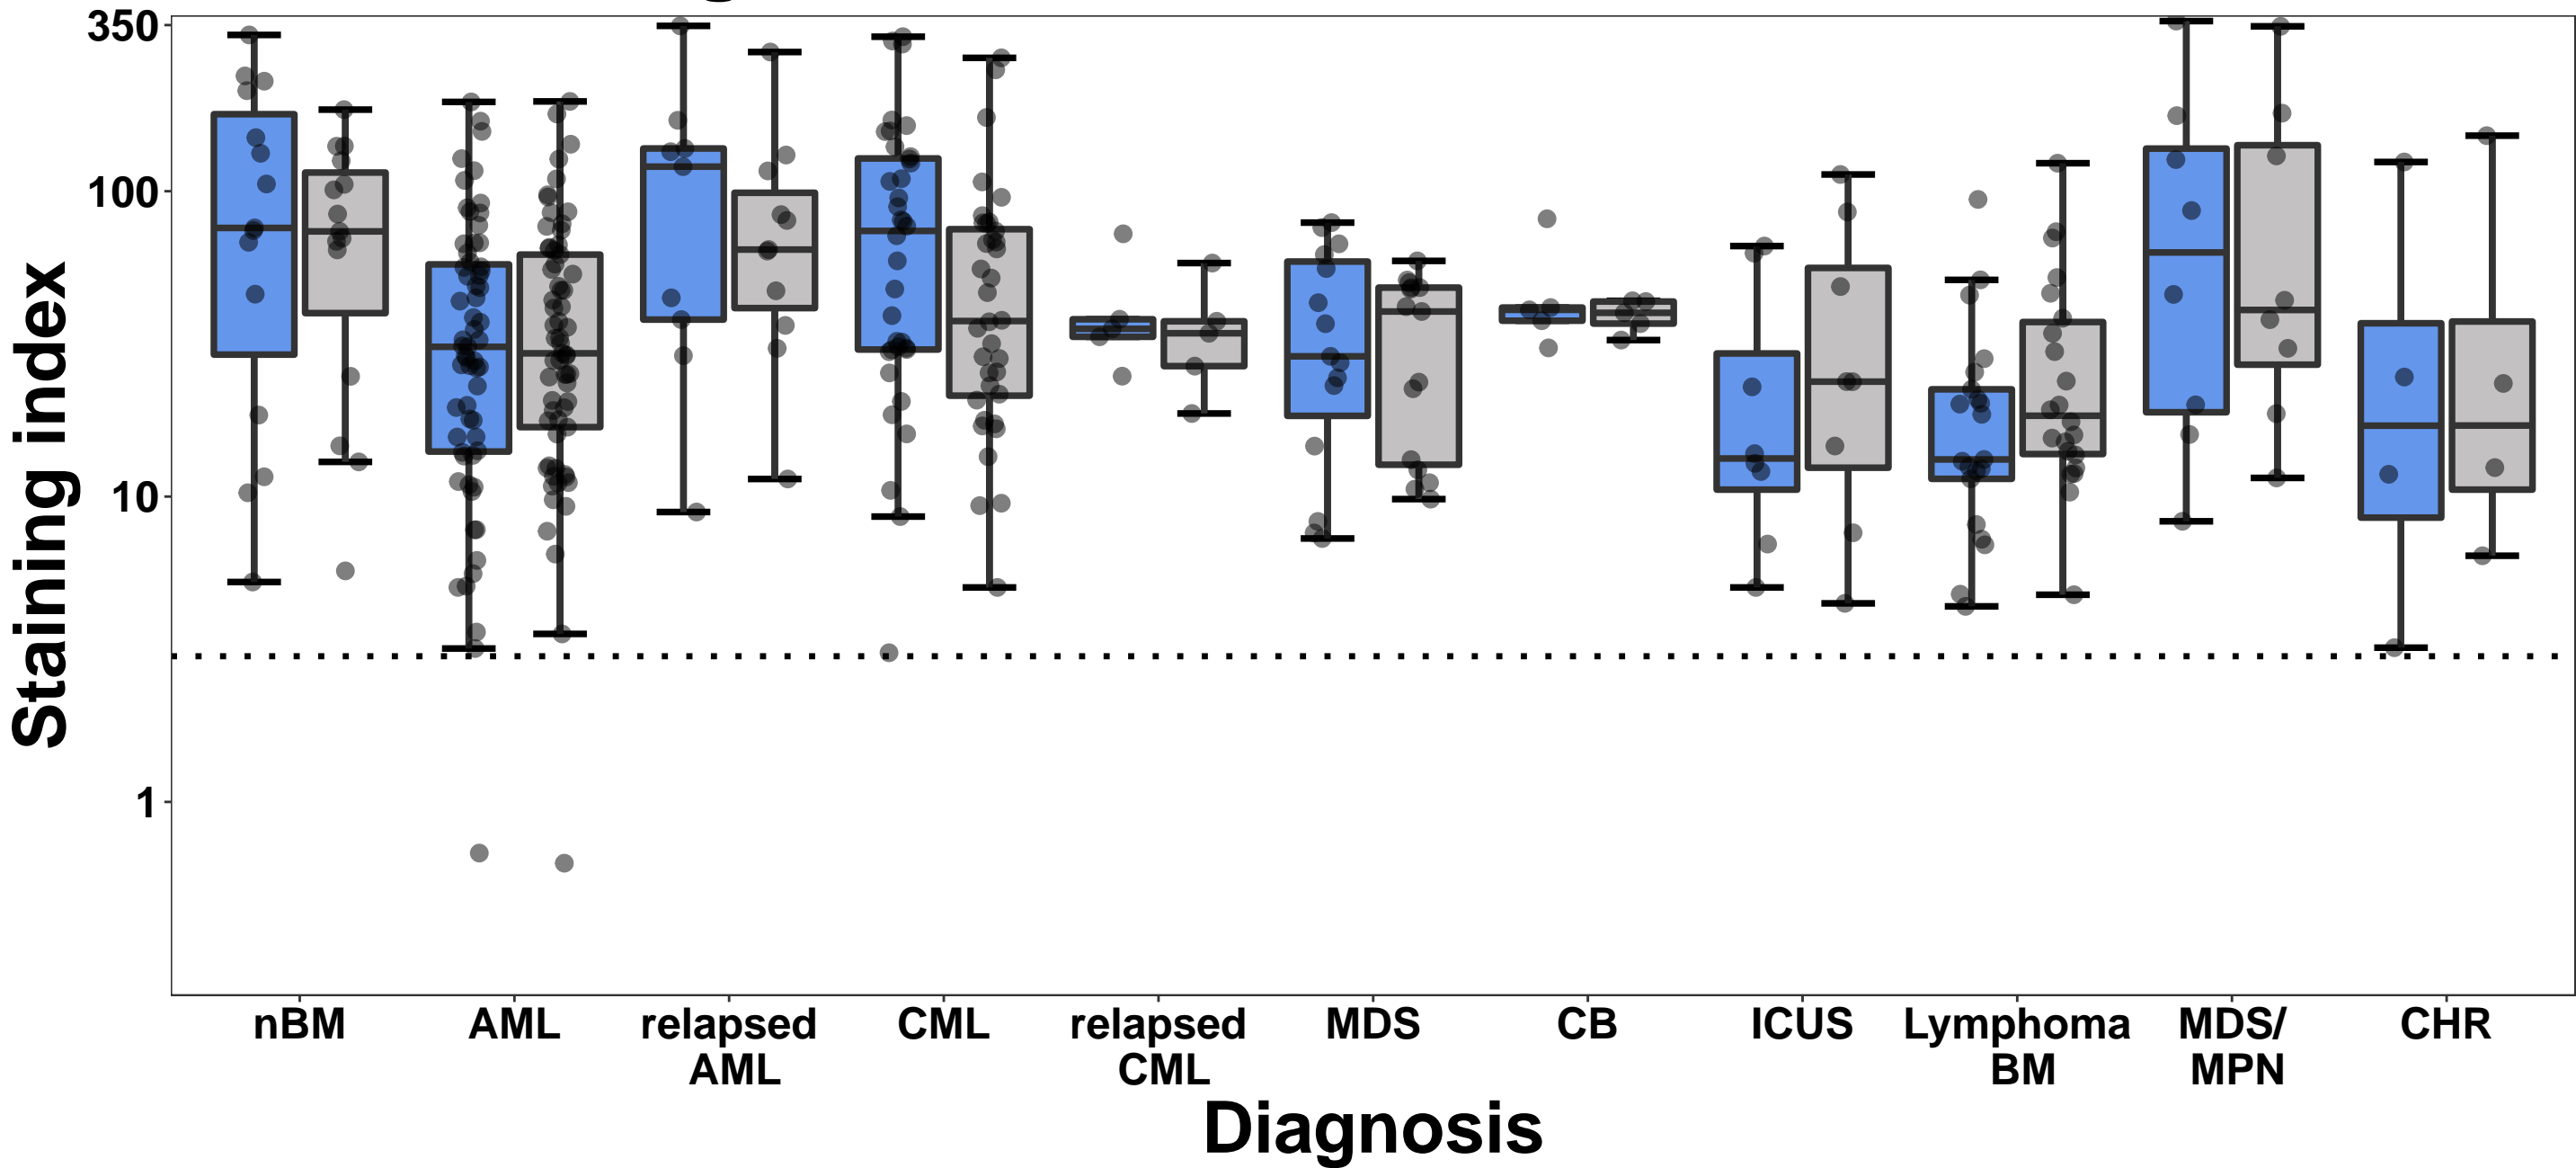

Cell fraction  CD34+/CD38-  CD34+/CD38+

# CD44 percentage

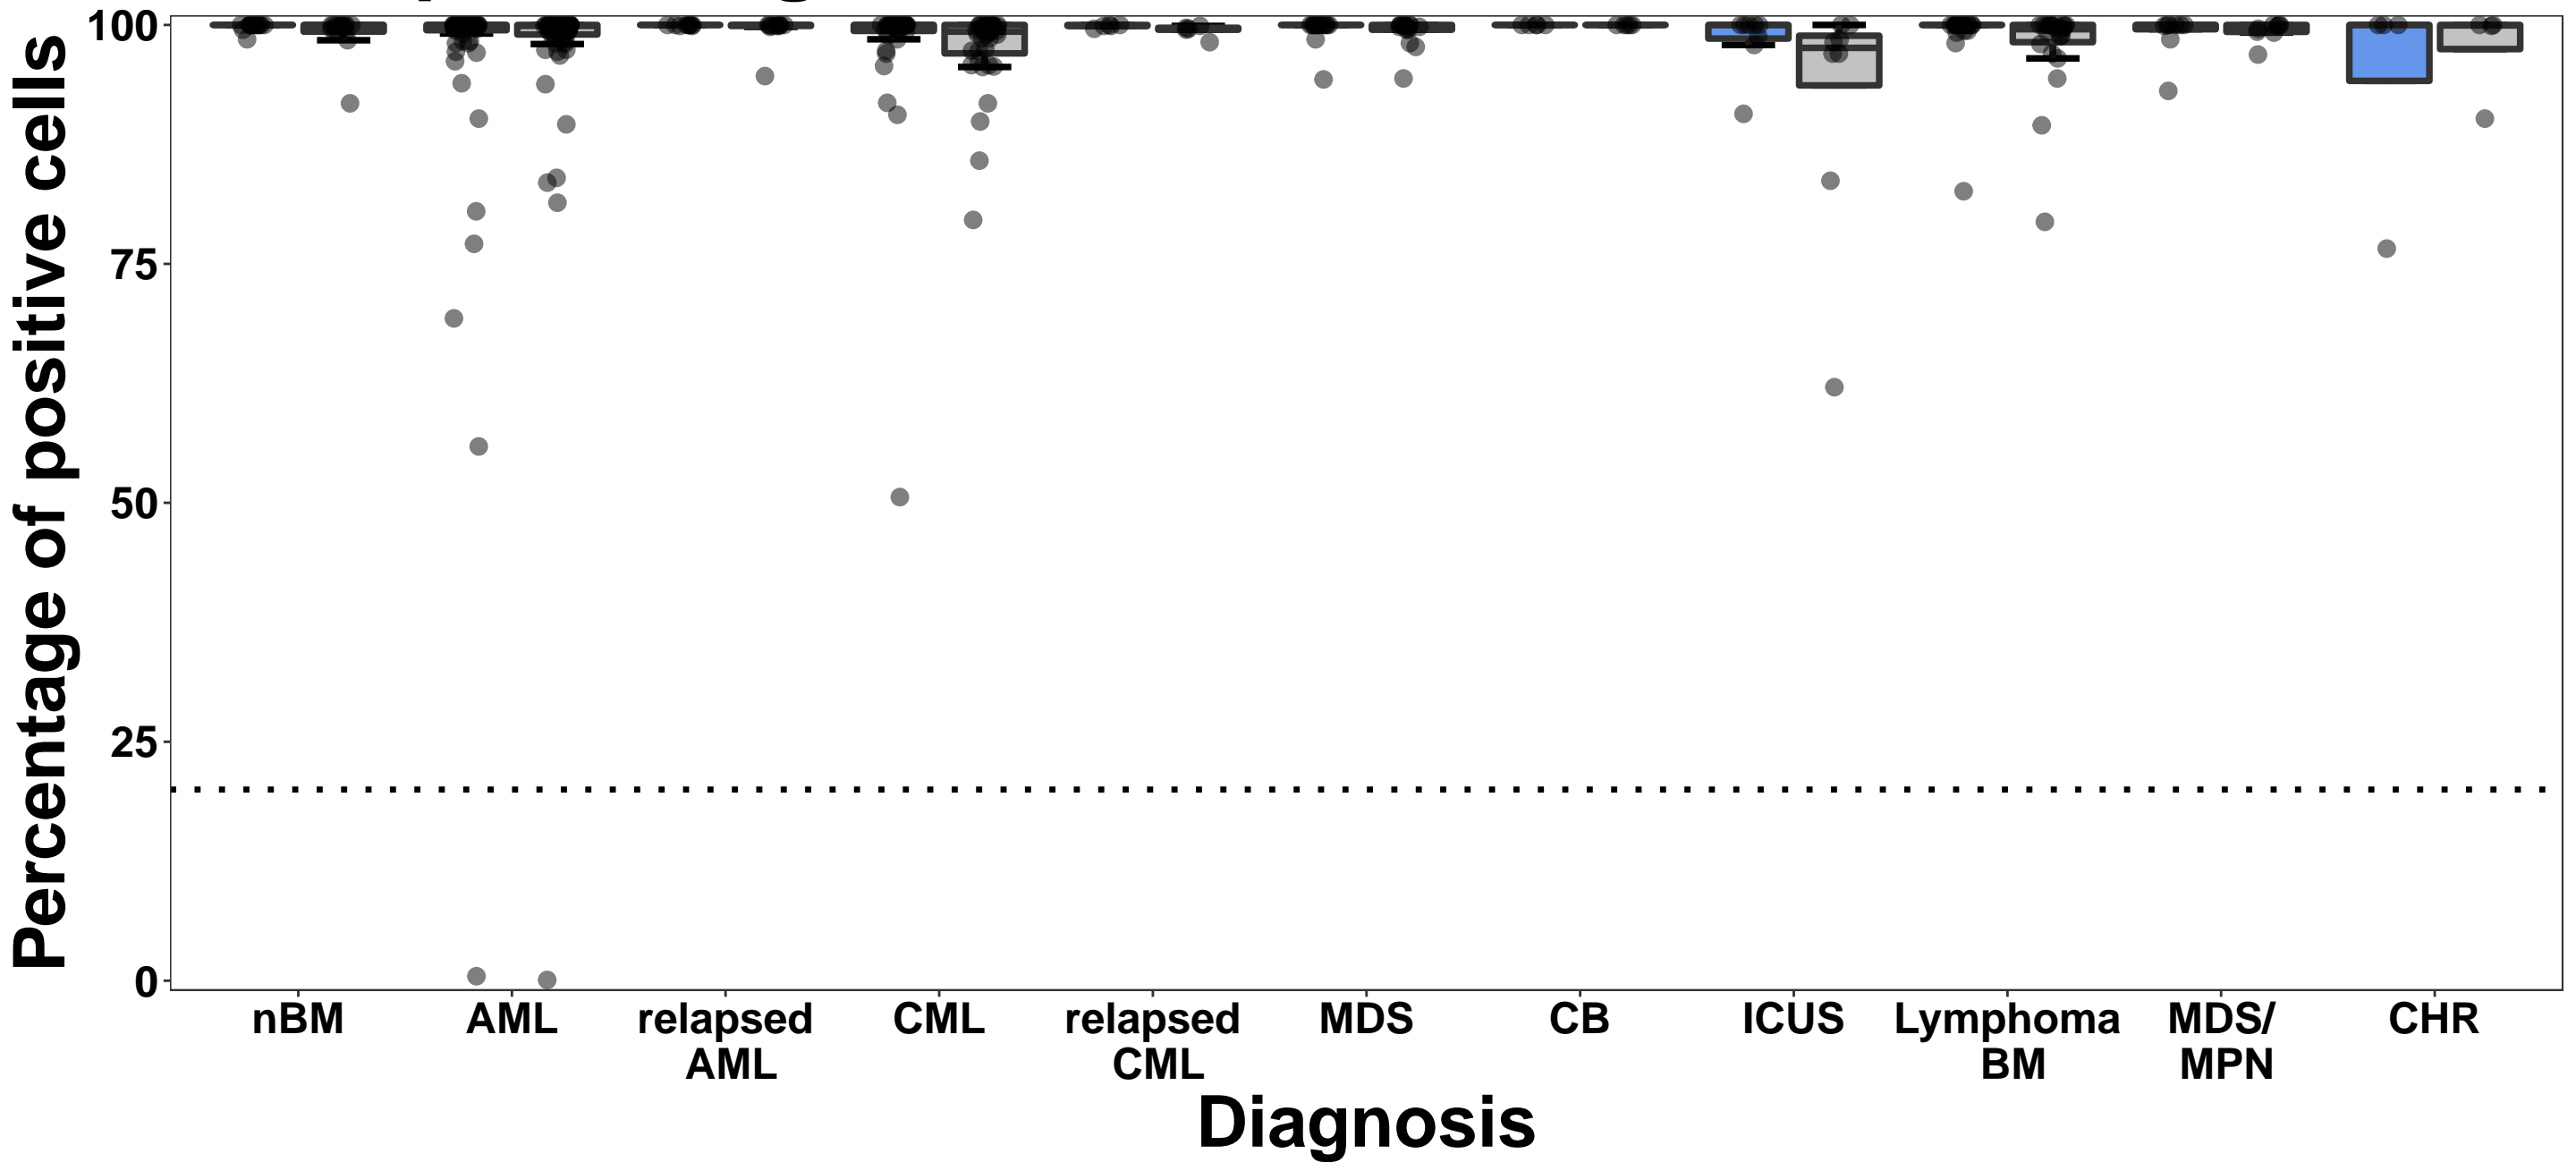

Cell fraction  CD34+/CD38-  CD34+/CD38+

# CD47 staining index

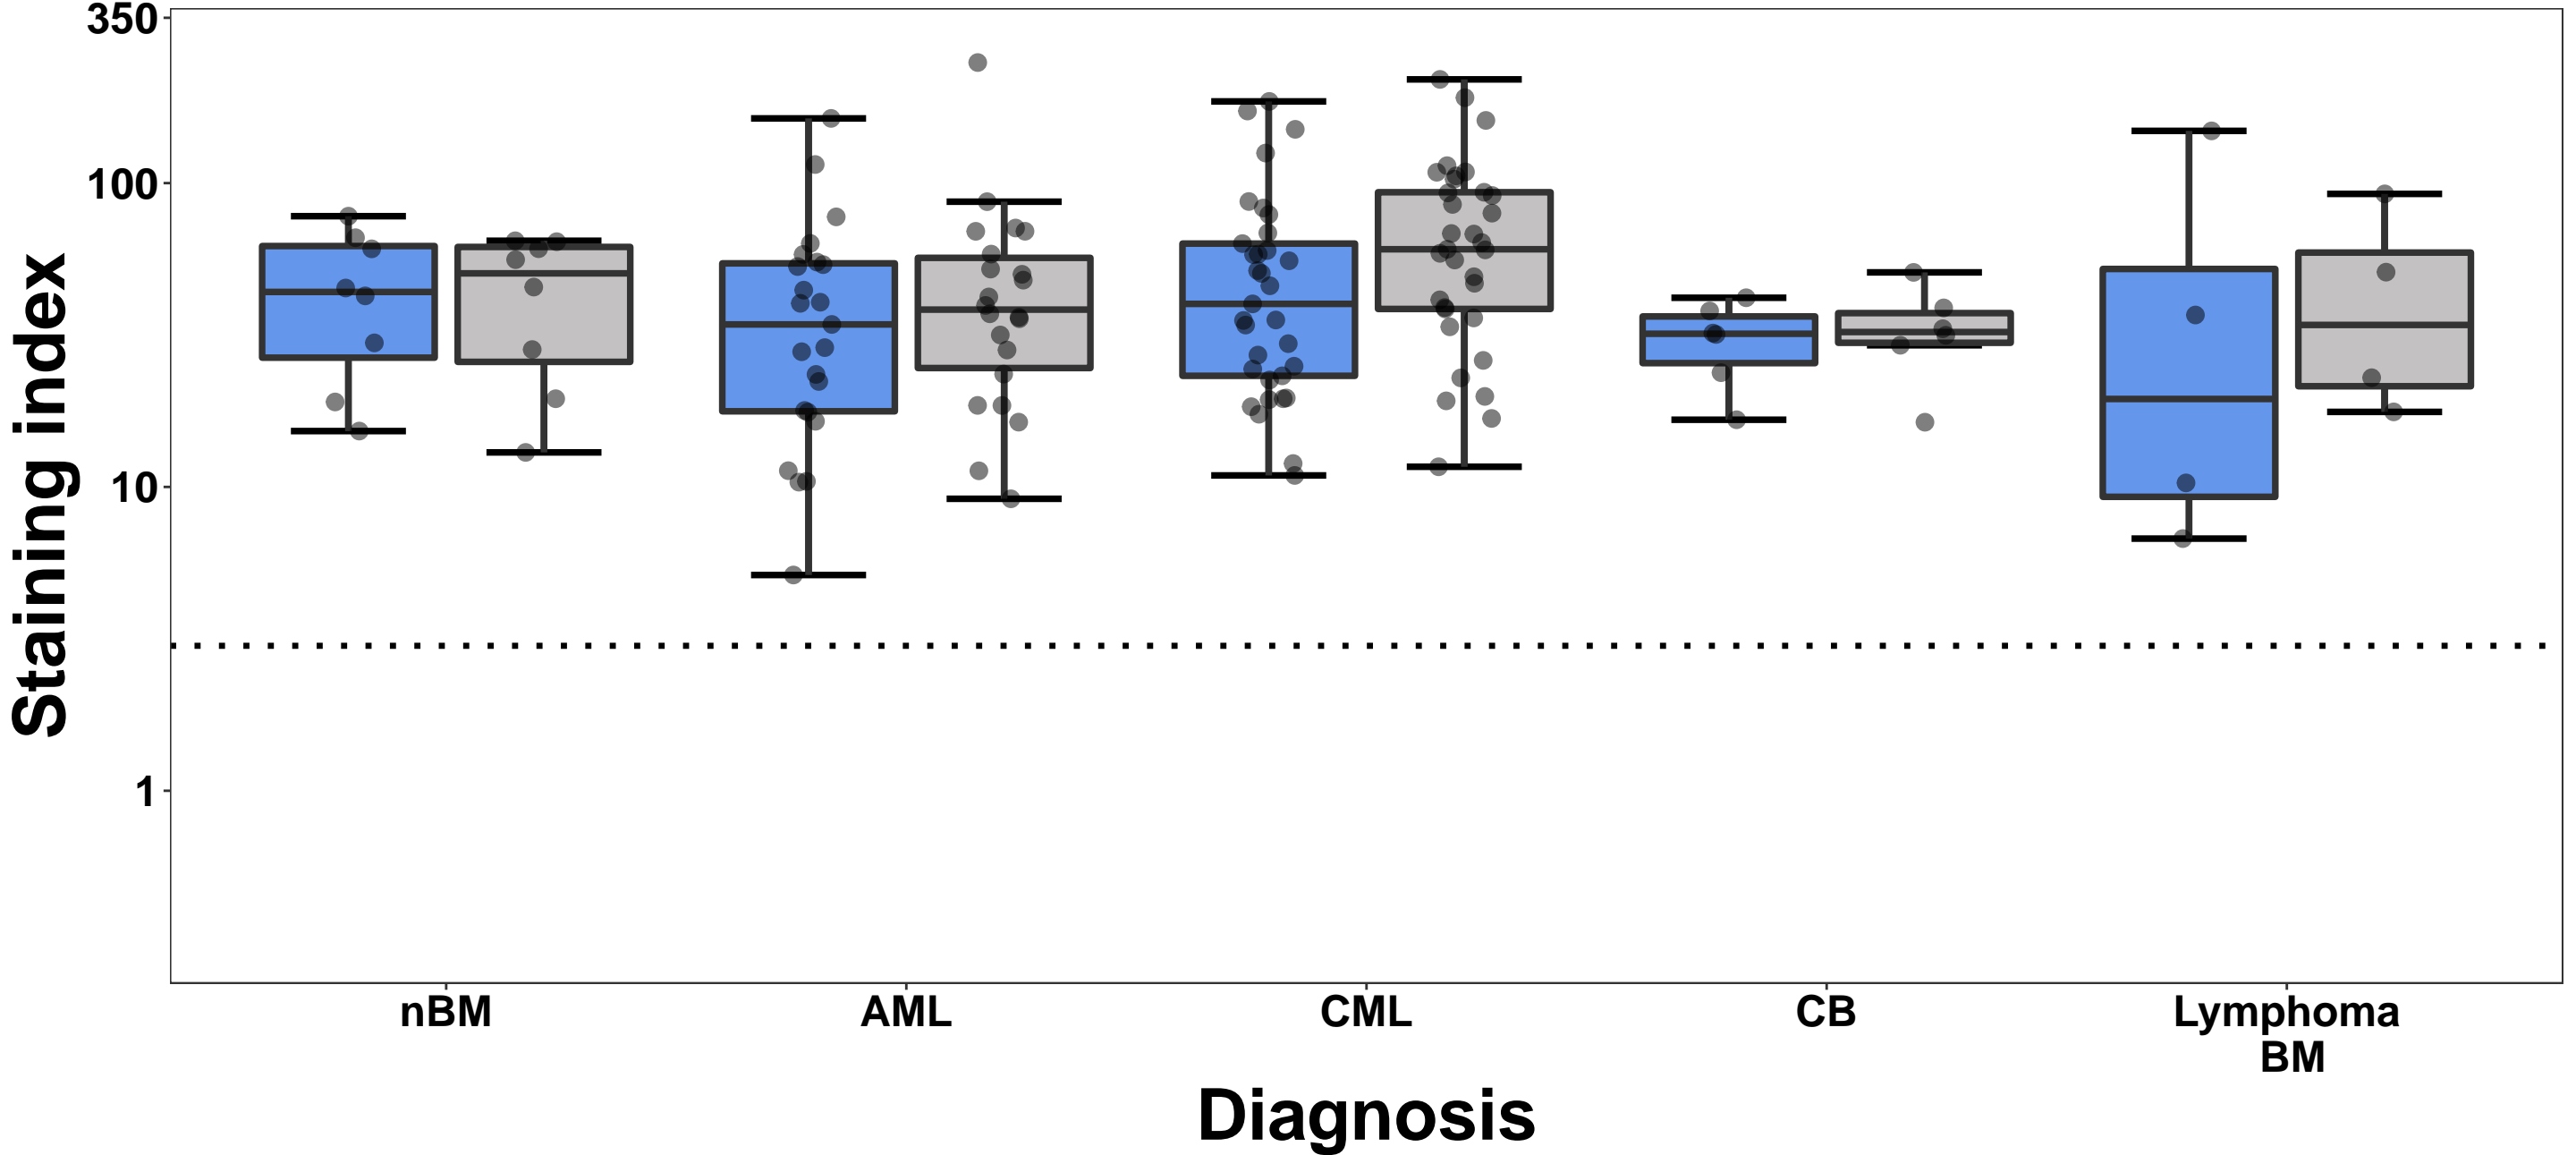

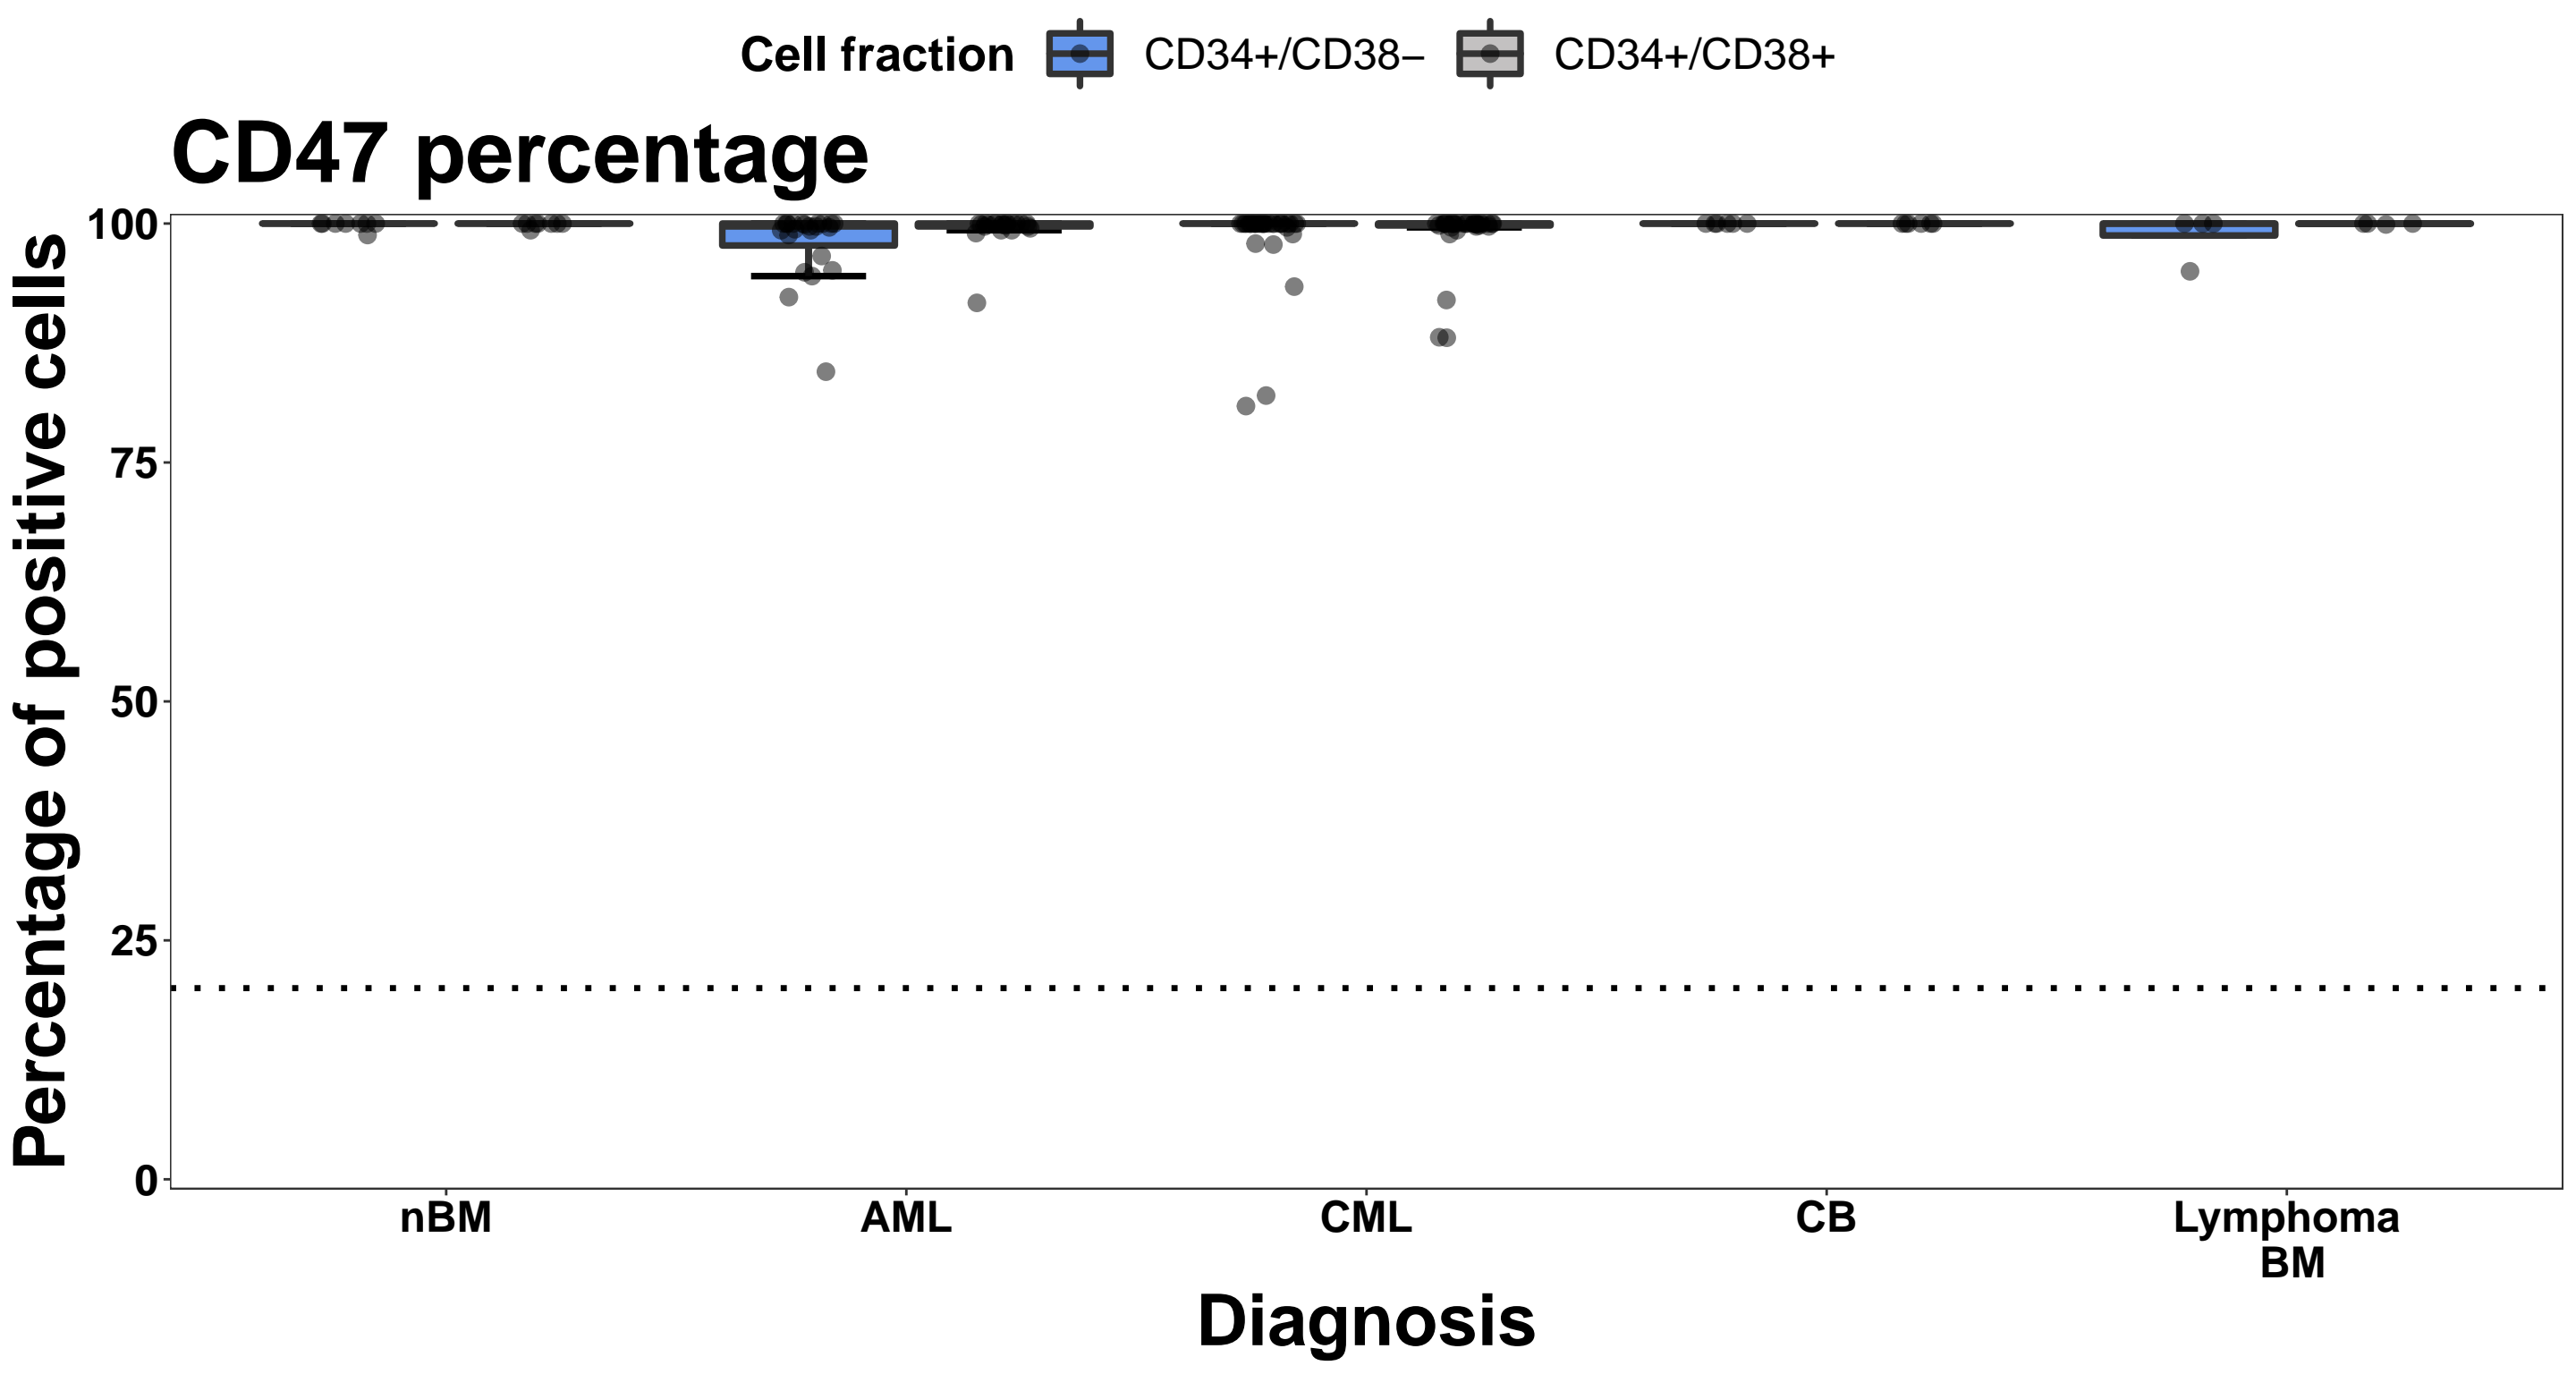

Cell fraction  CD34+/CD38-  CD34+/CD38+

# CD49f staining index

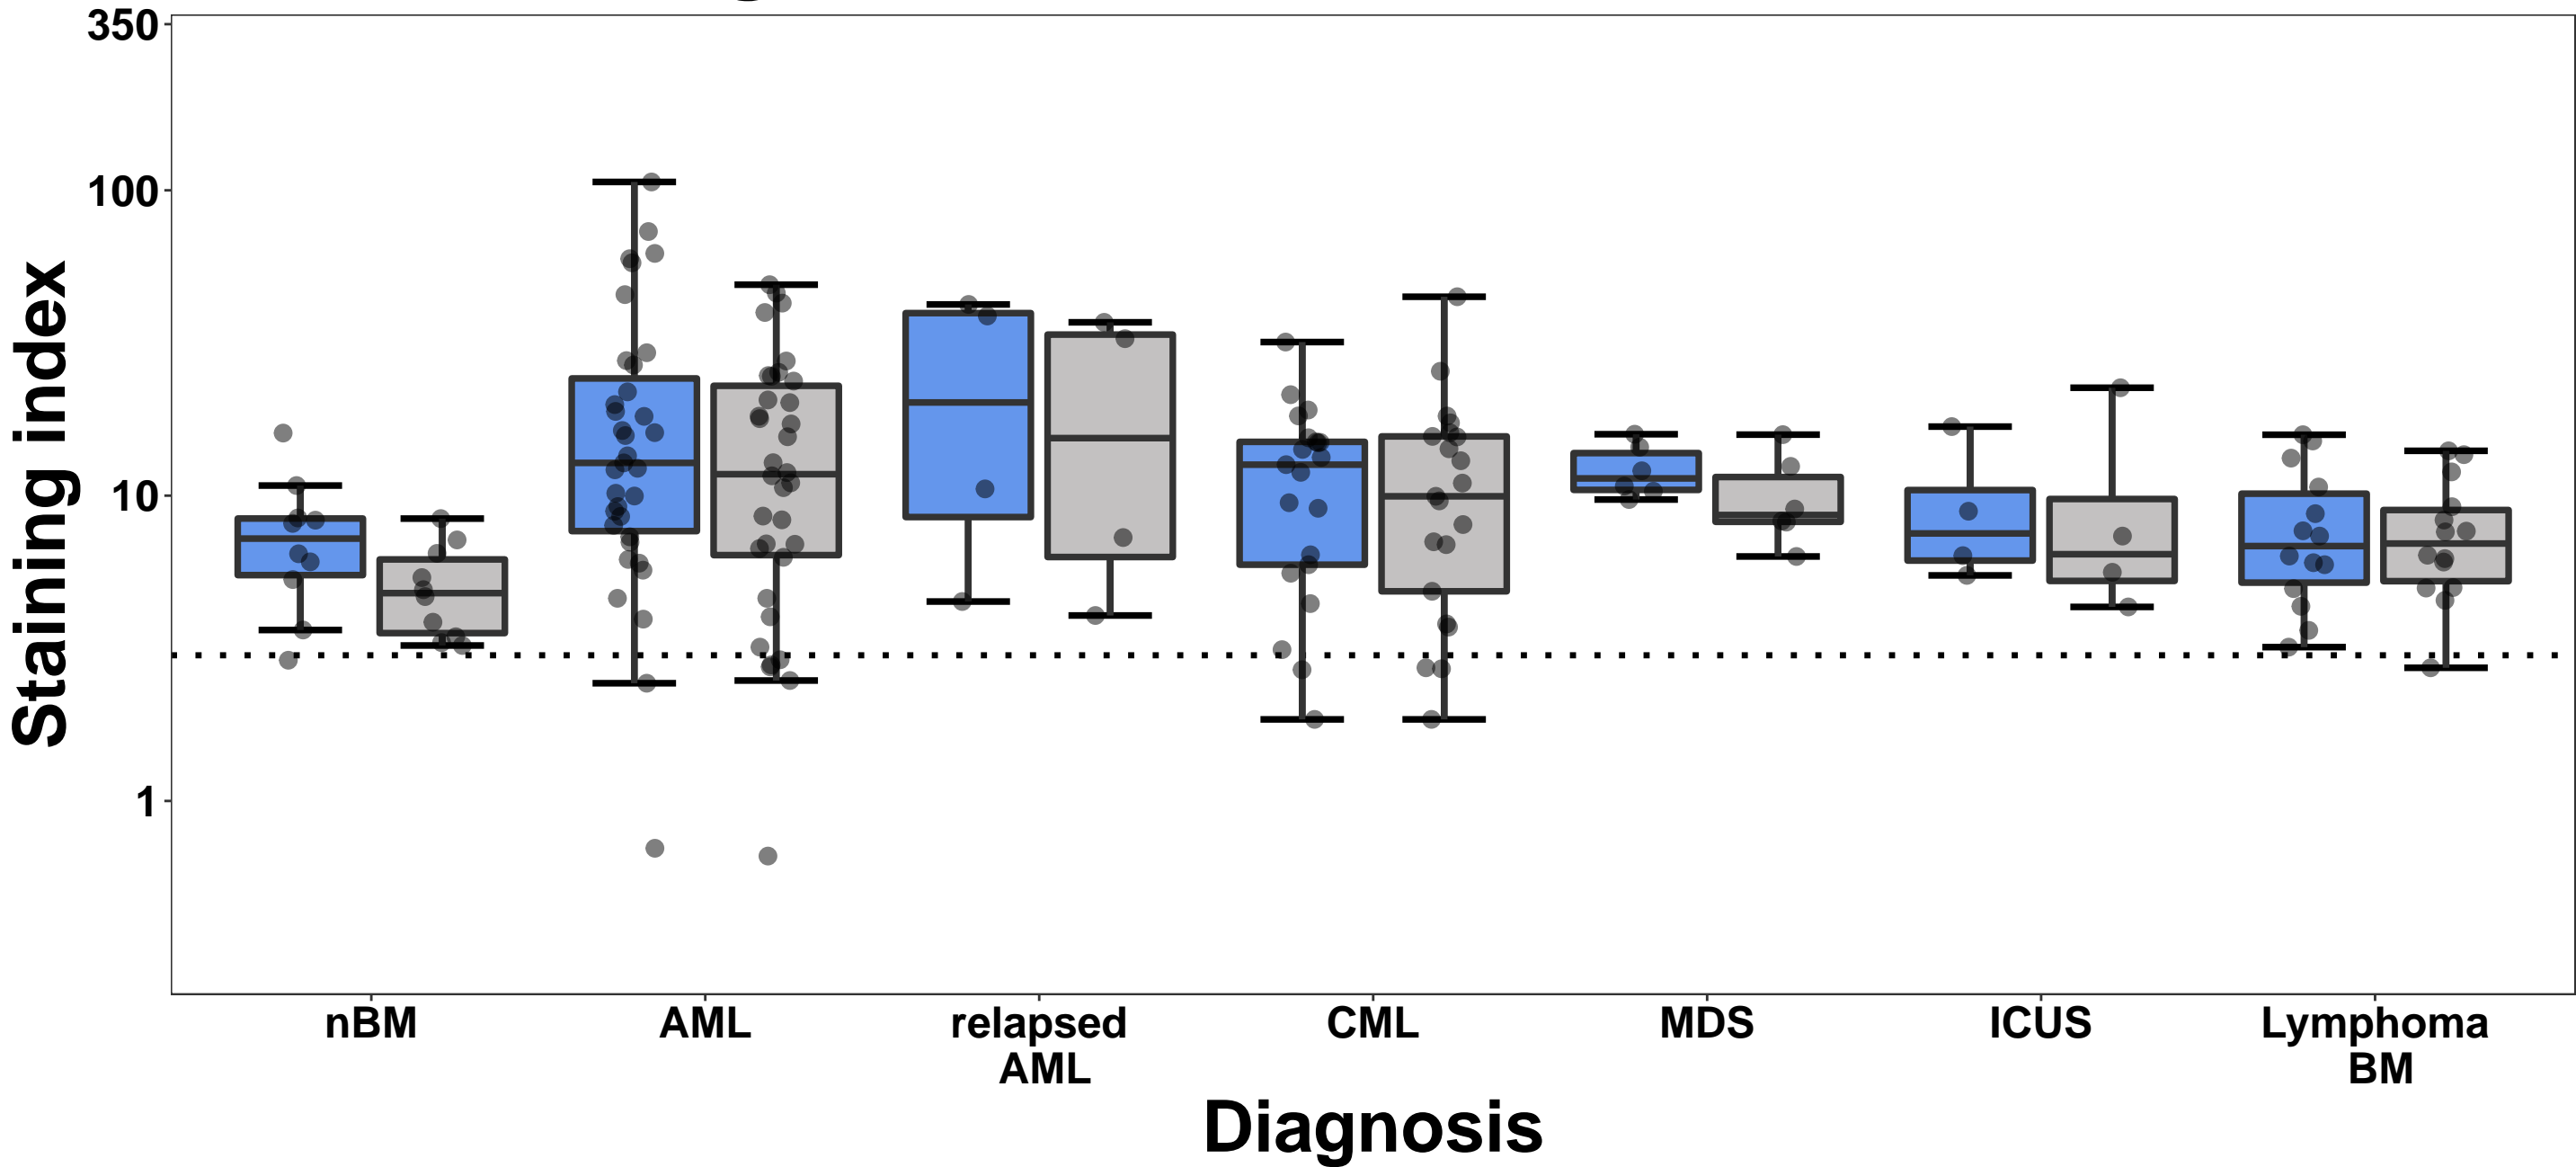

Cell fraction  CD34+/CD38-  CD34+/CD38+

# CD49f percentage

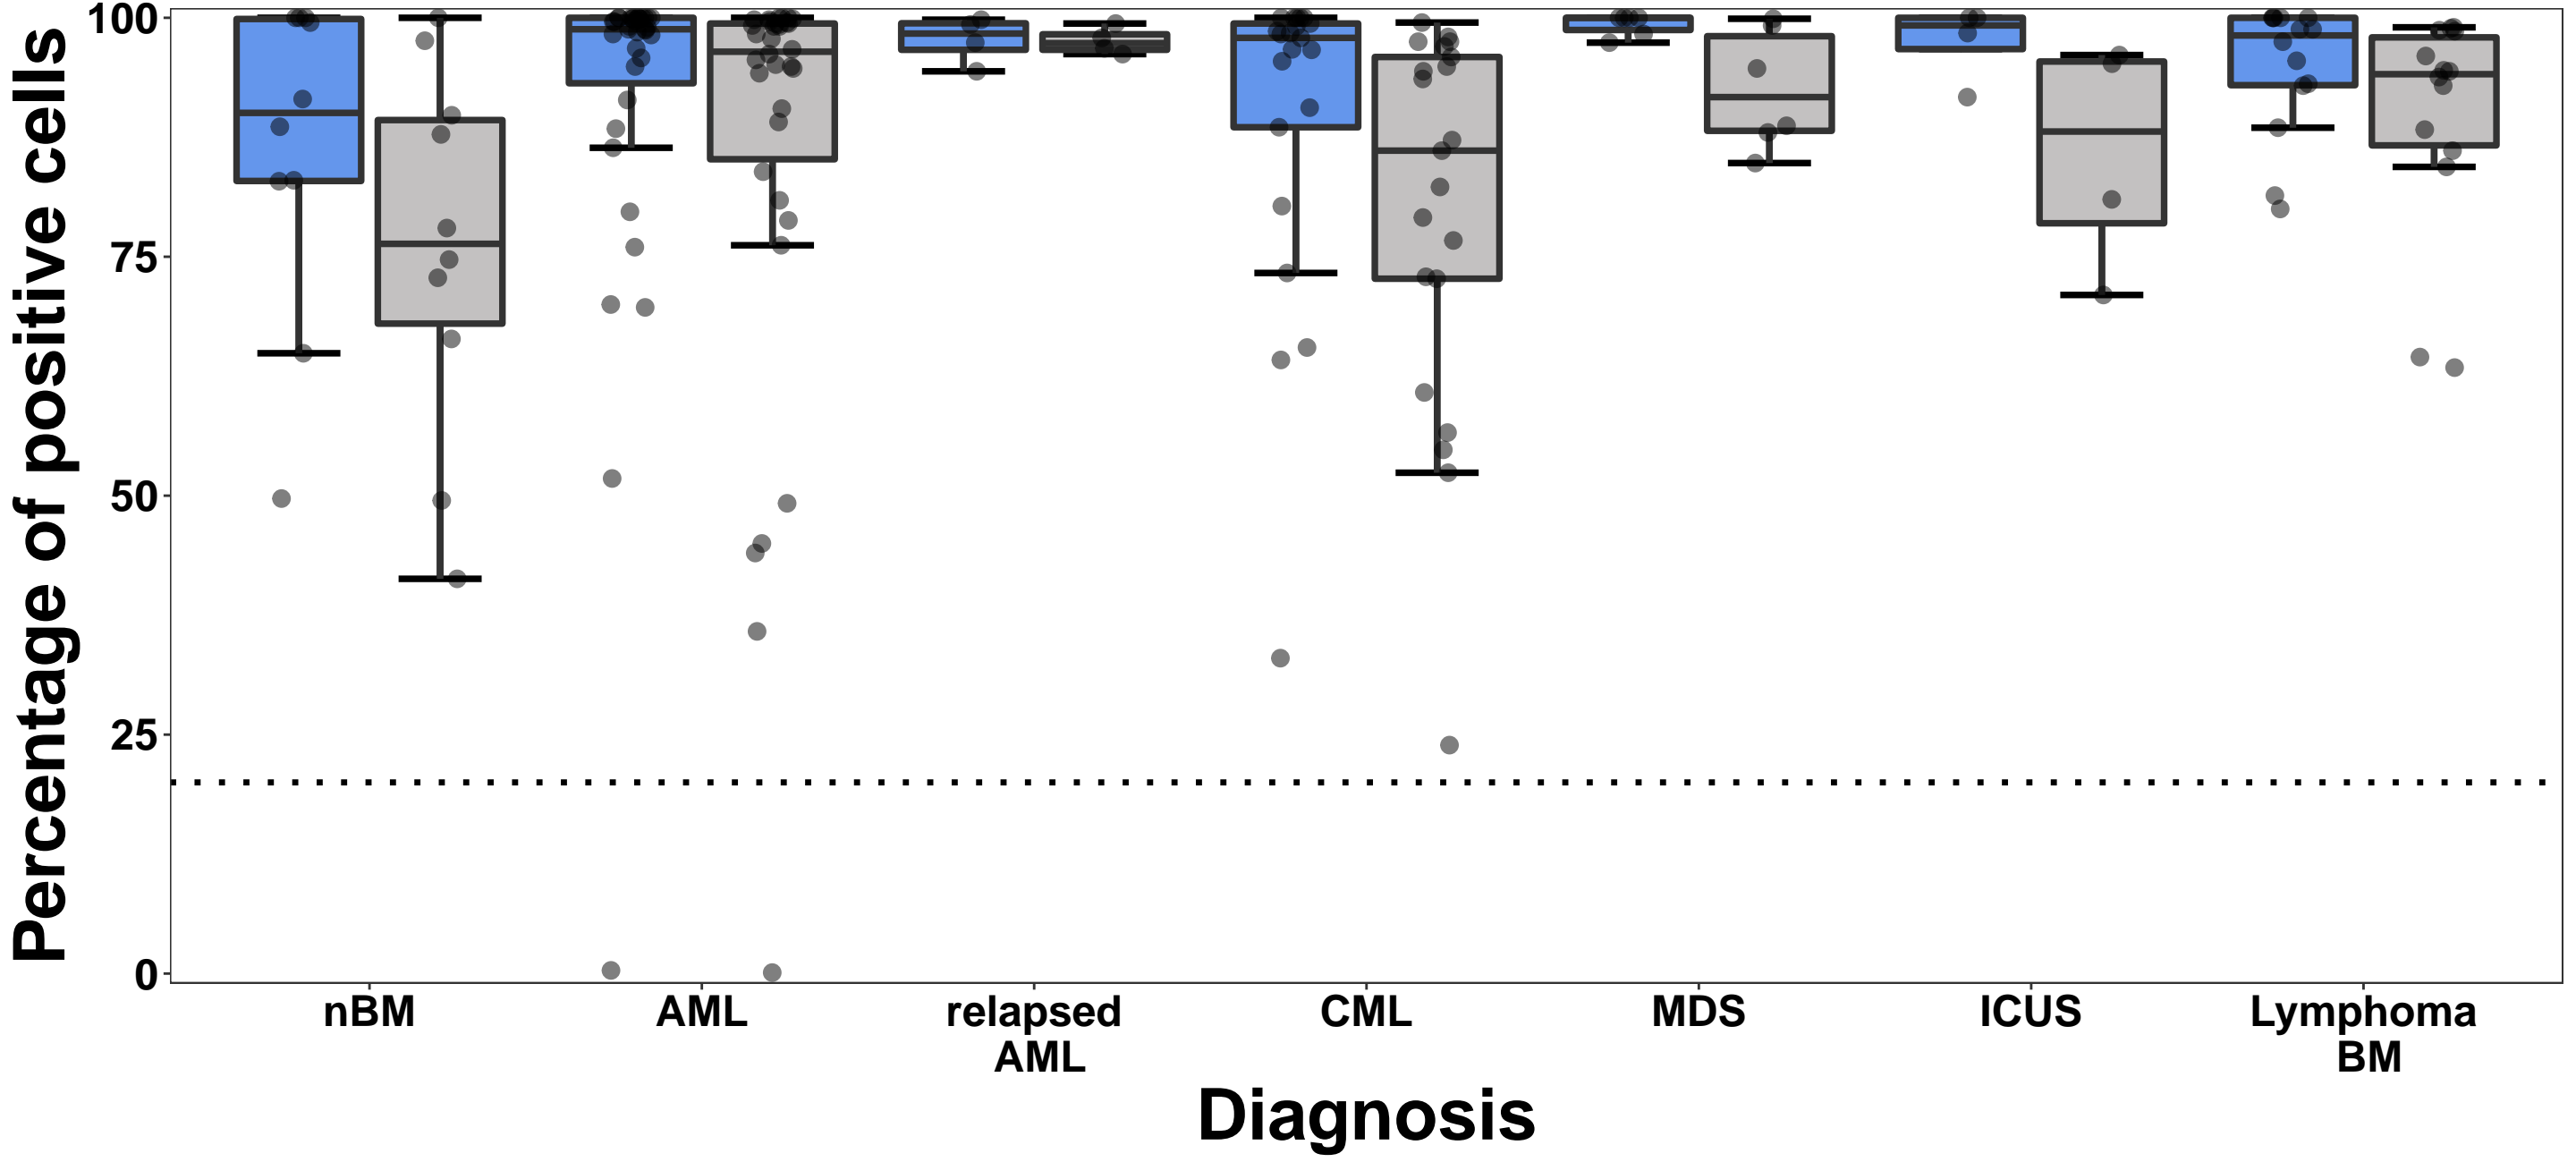

Cell fraction  CD34+/CD38-  CD34+/CD38+

# CD51 staining index

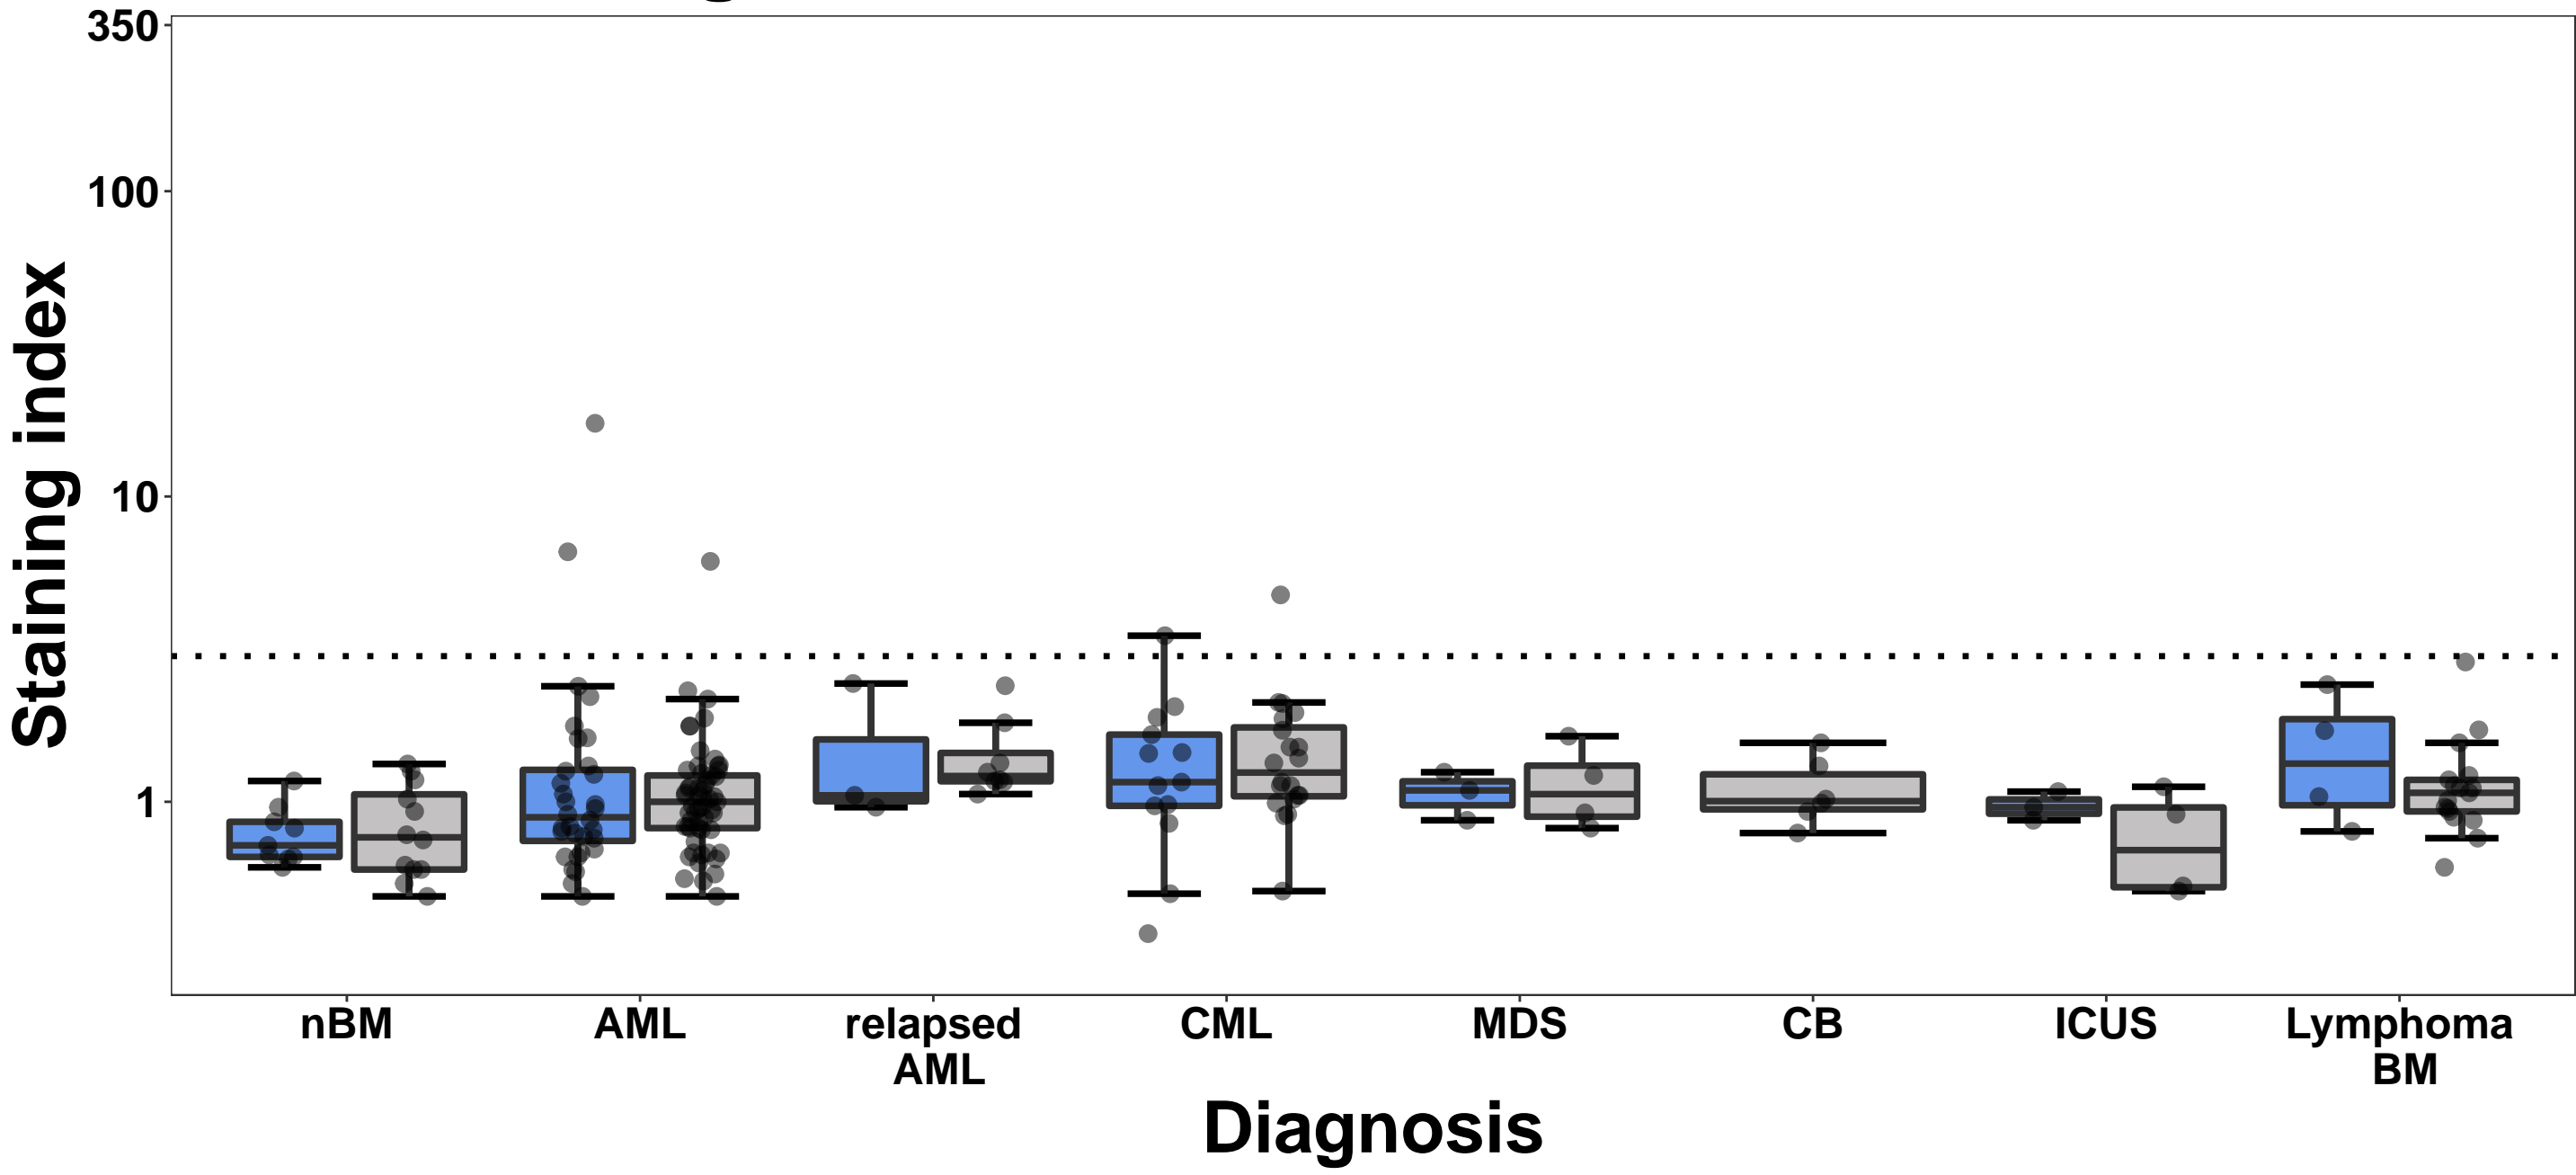



Cell fraction  CD34+/CD38-  CD34+/CD38+

# CD51 percentage

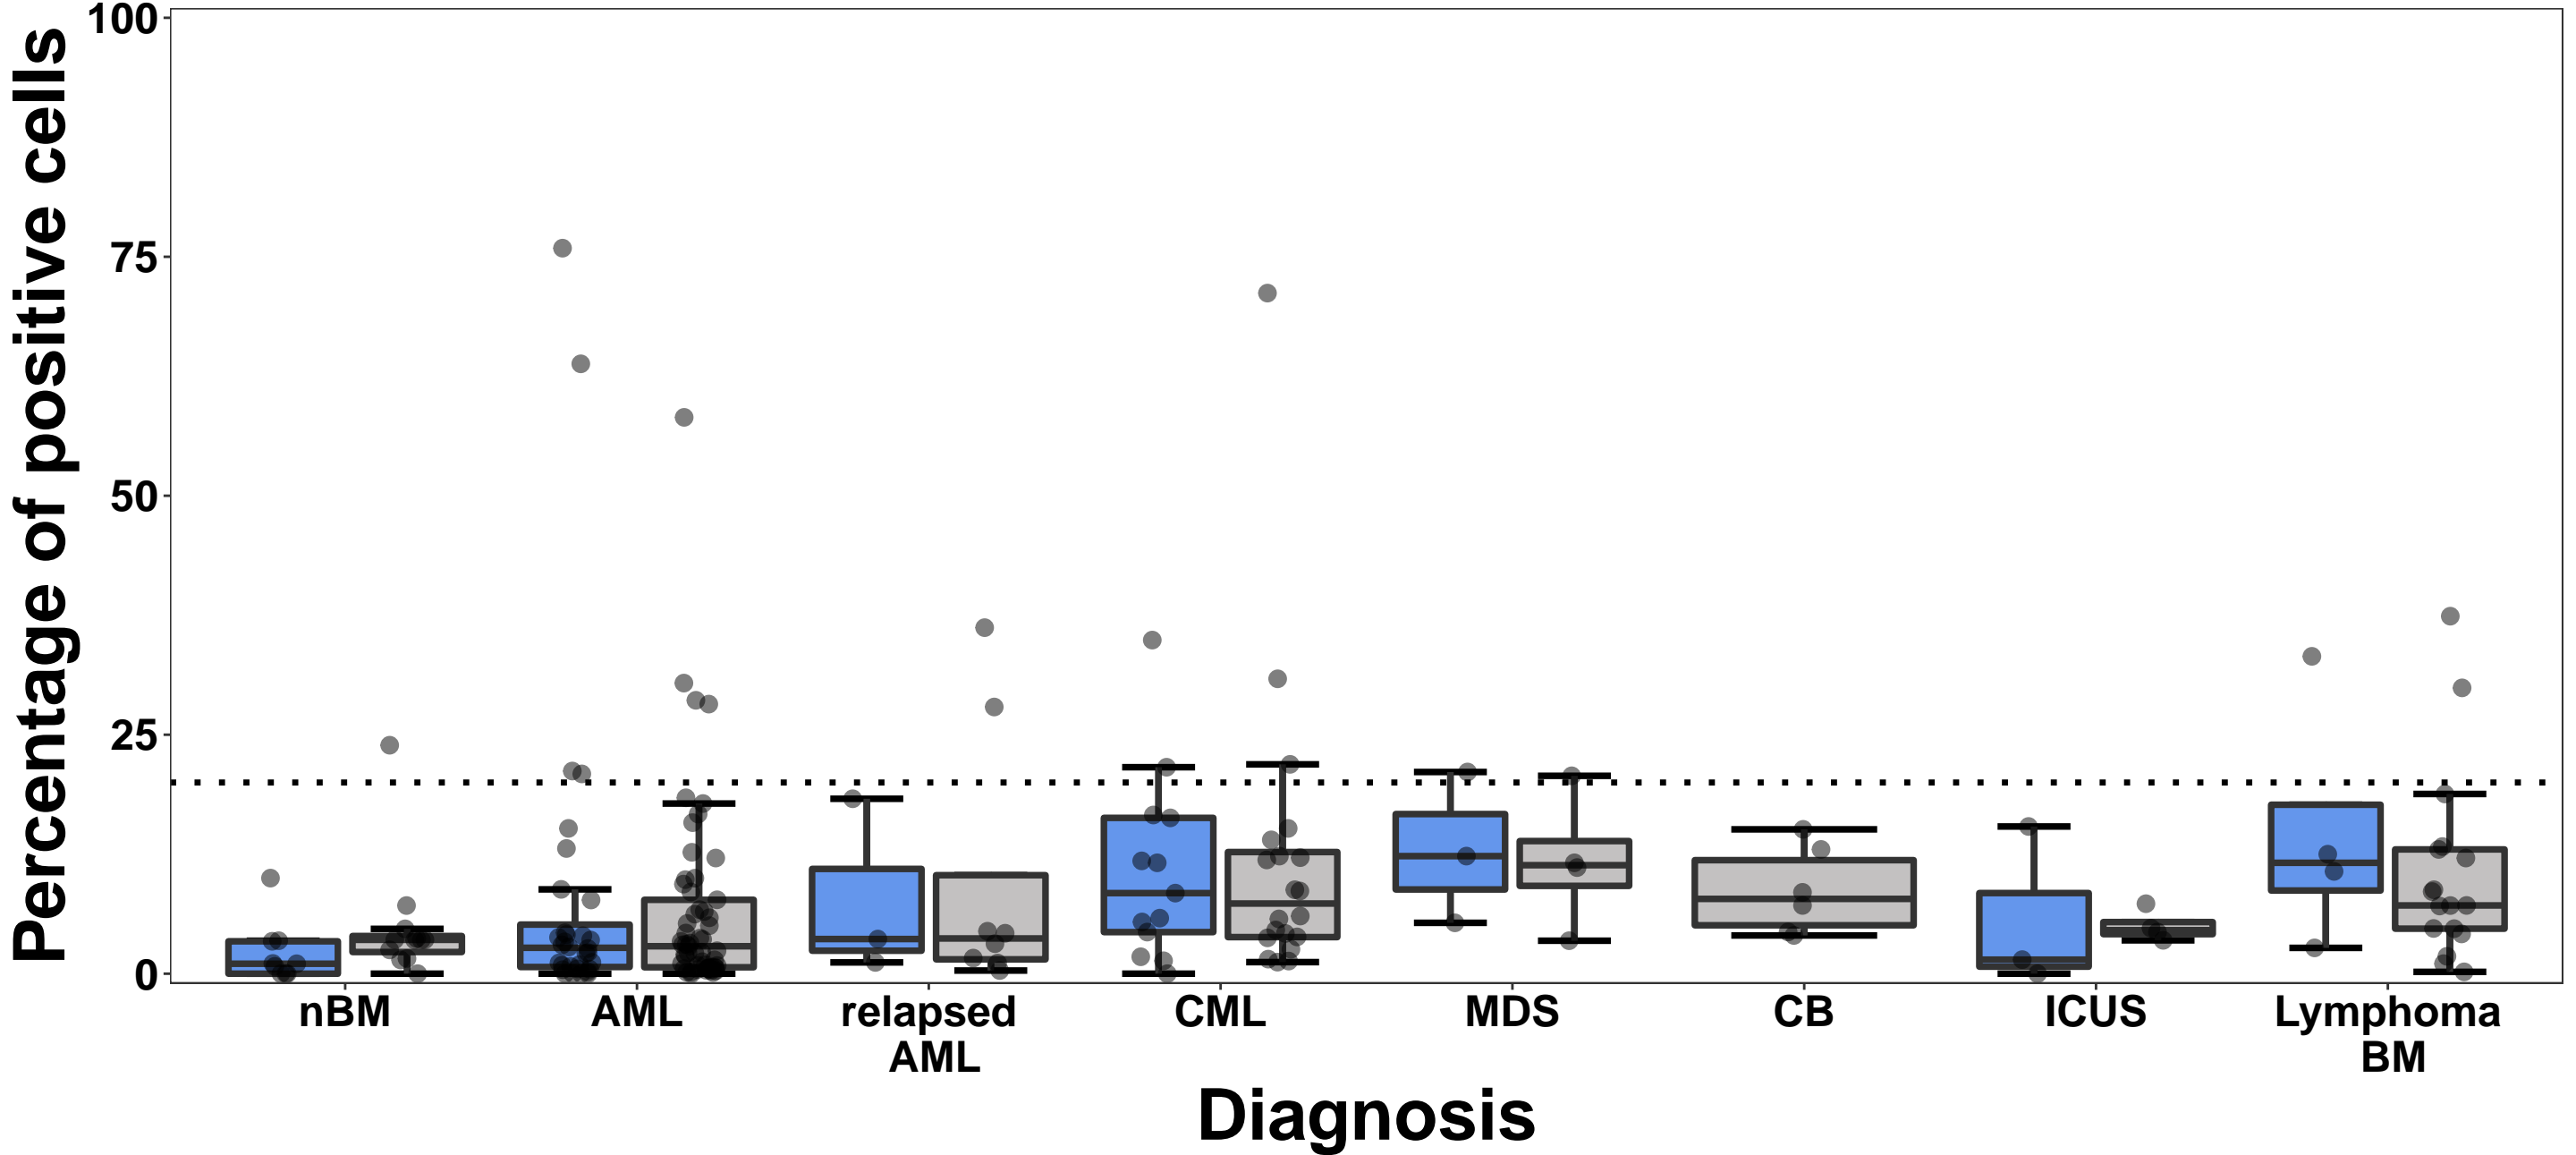

# CD51/61 staining index

Cell fraction  CD34+/CD38-  CD34+/CD38+

Staining index

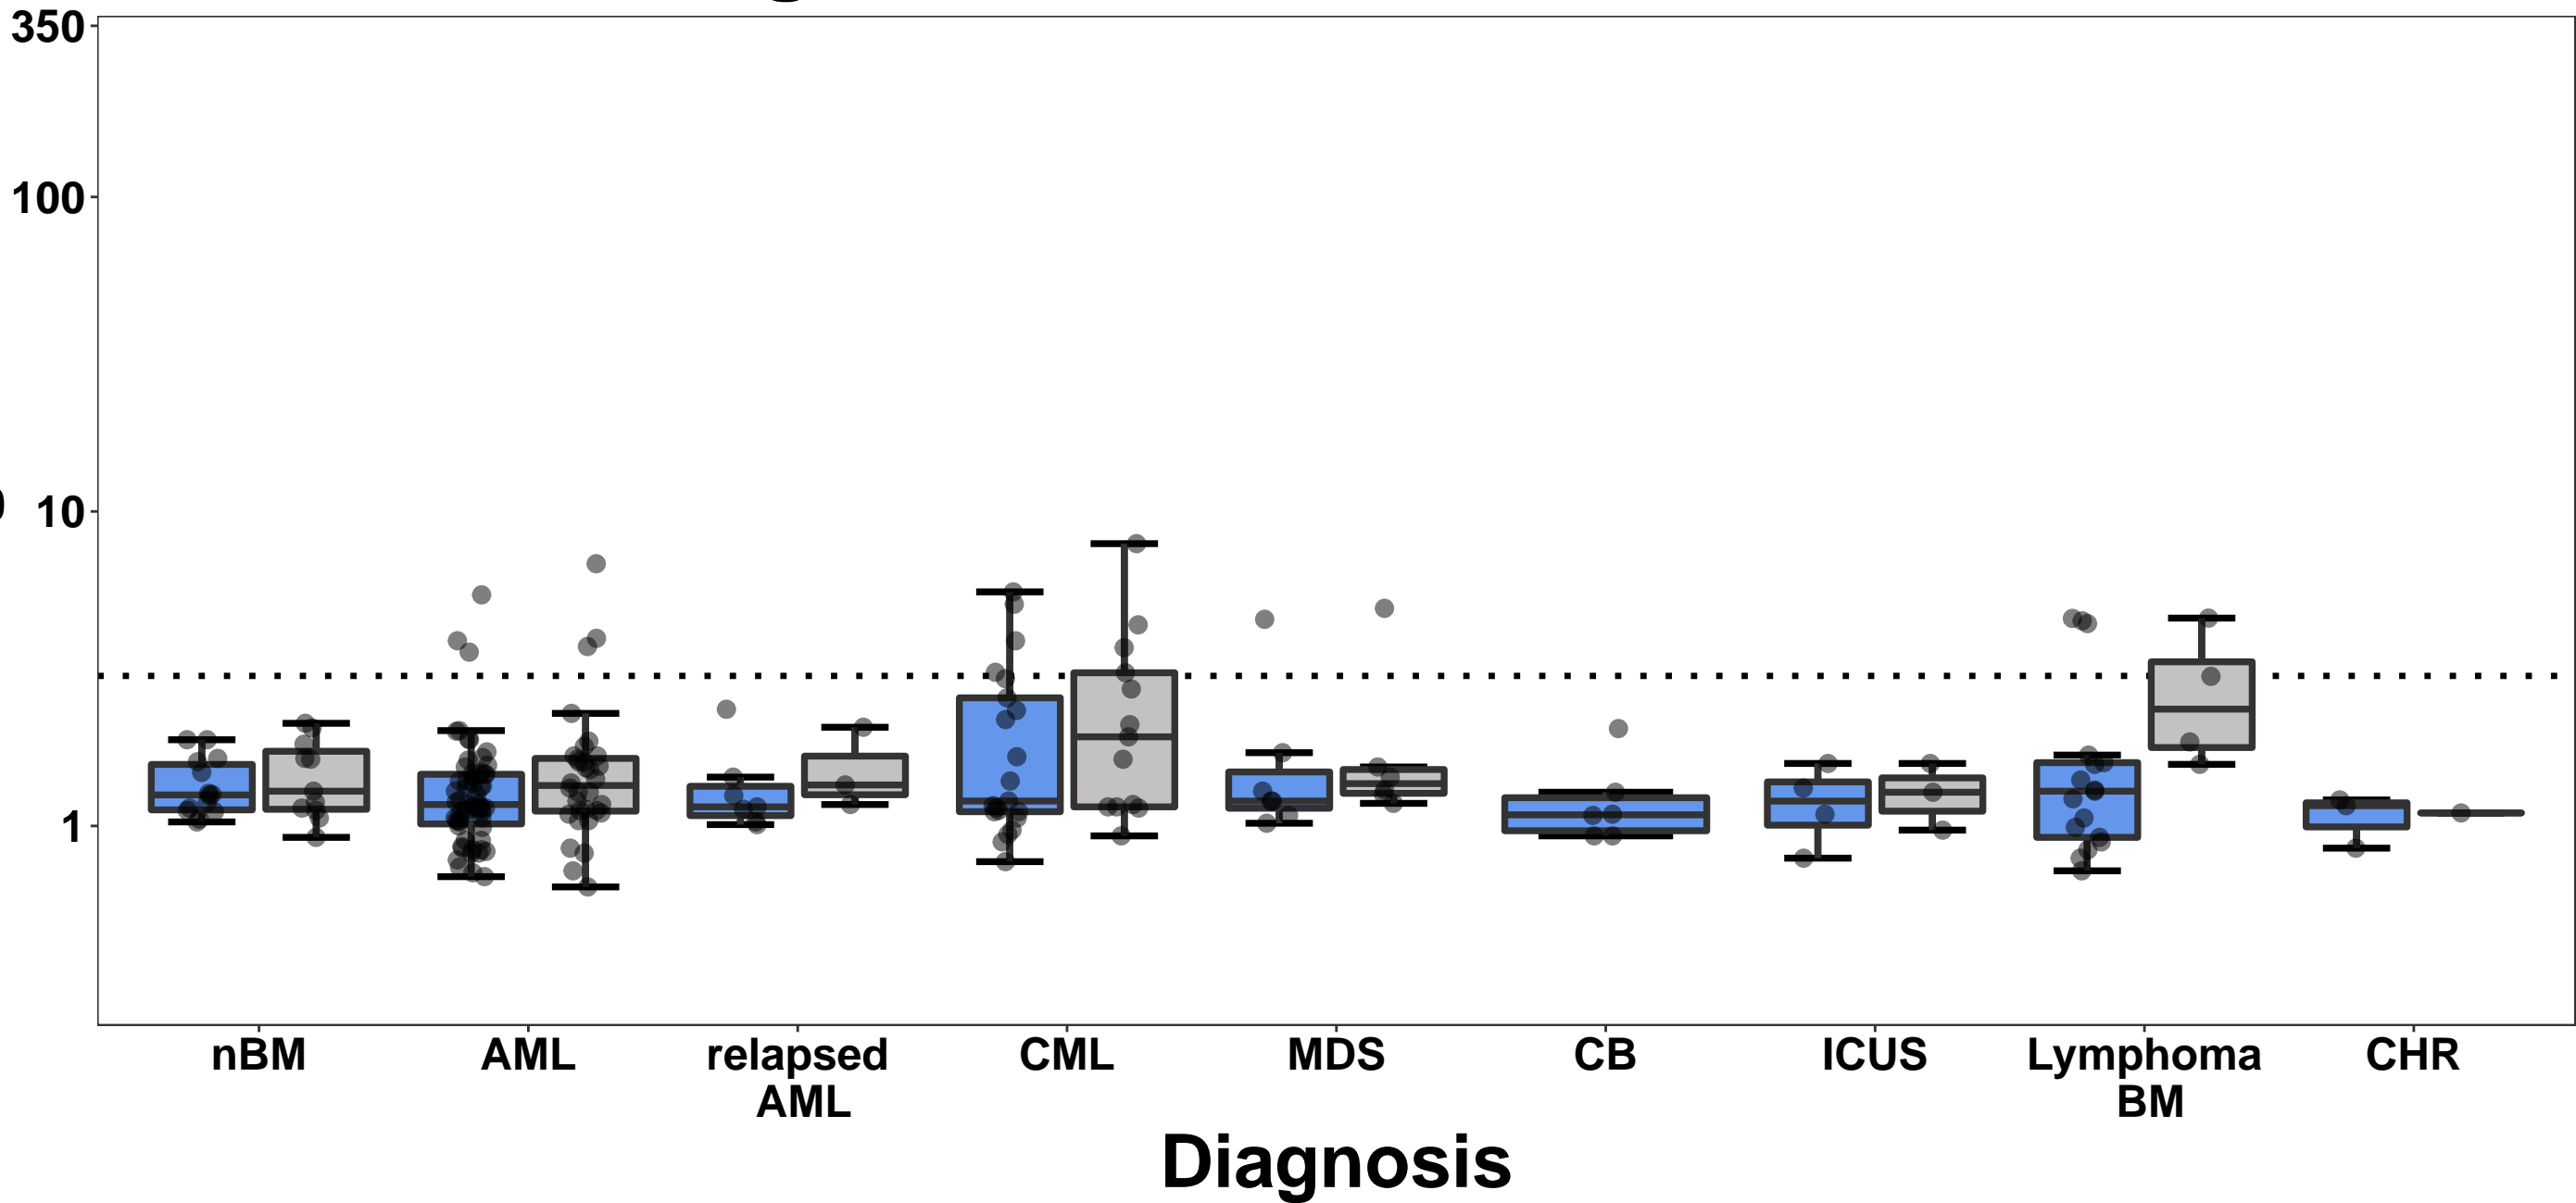

Cell fraction  CD34+/CD38-  CD34+/CD38+

# CD51/61 percentage

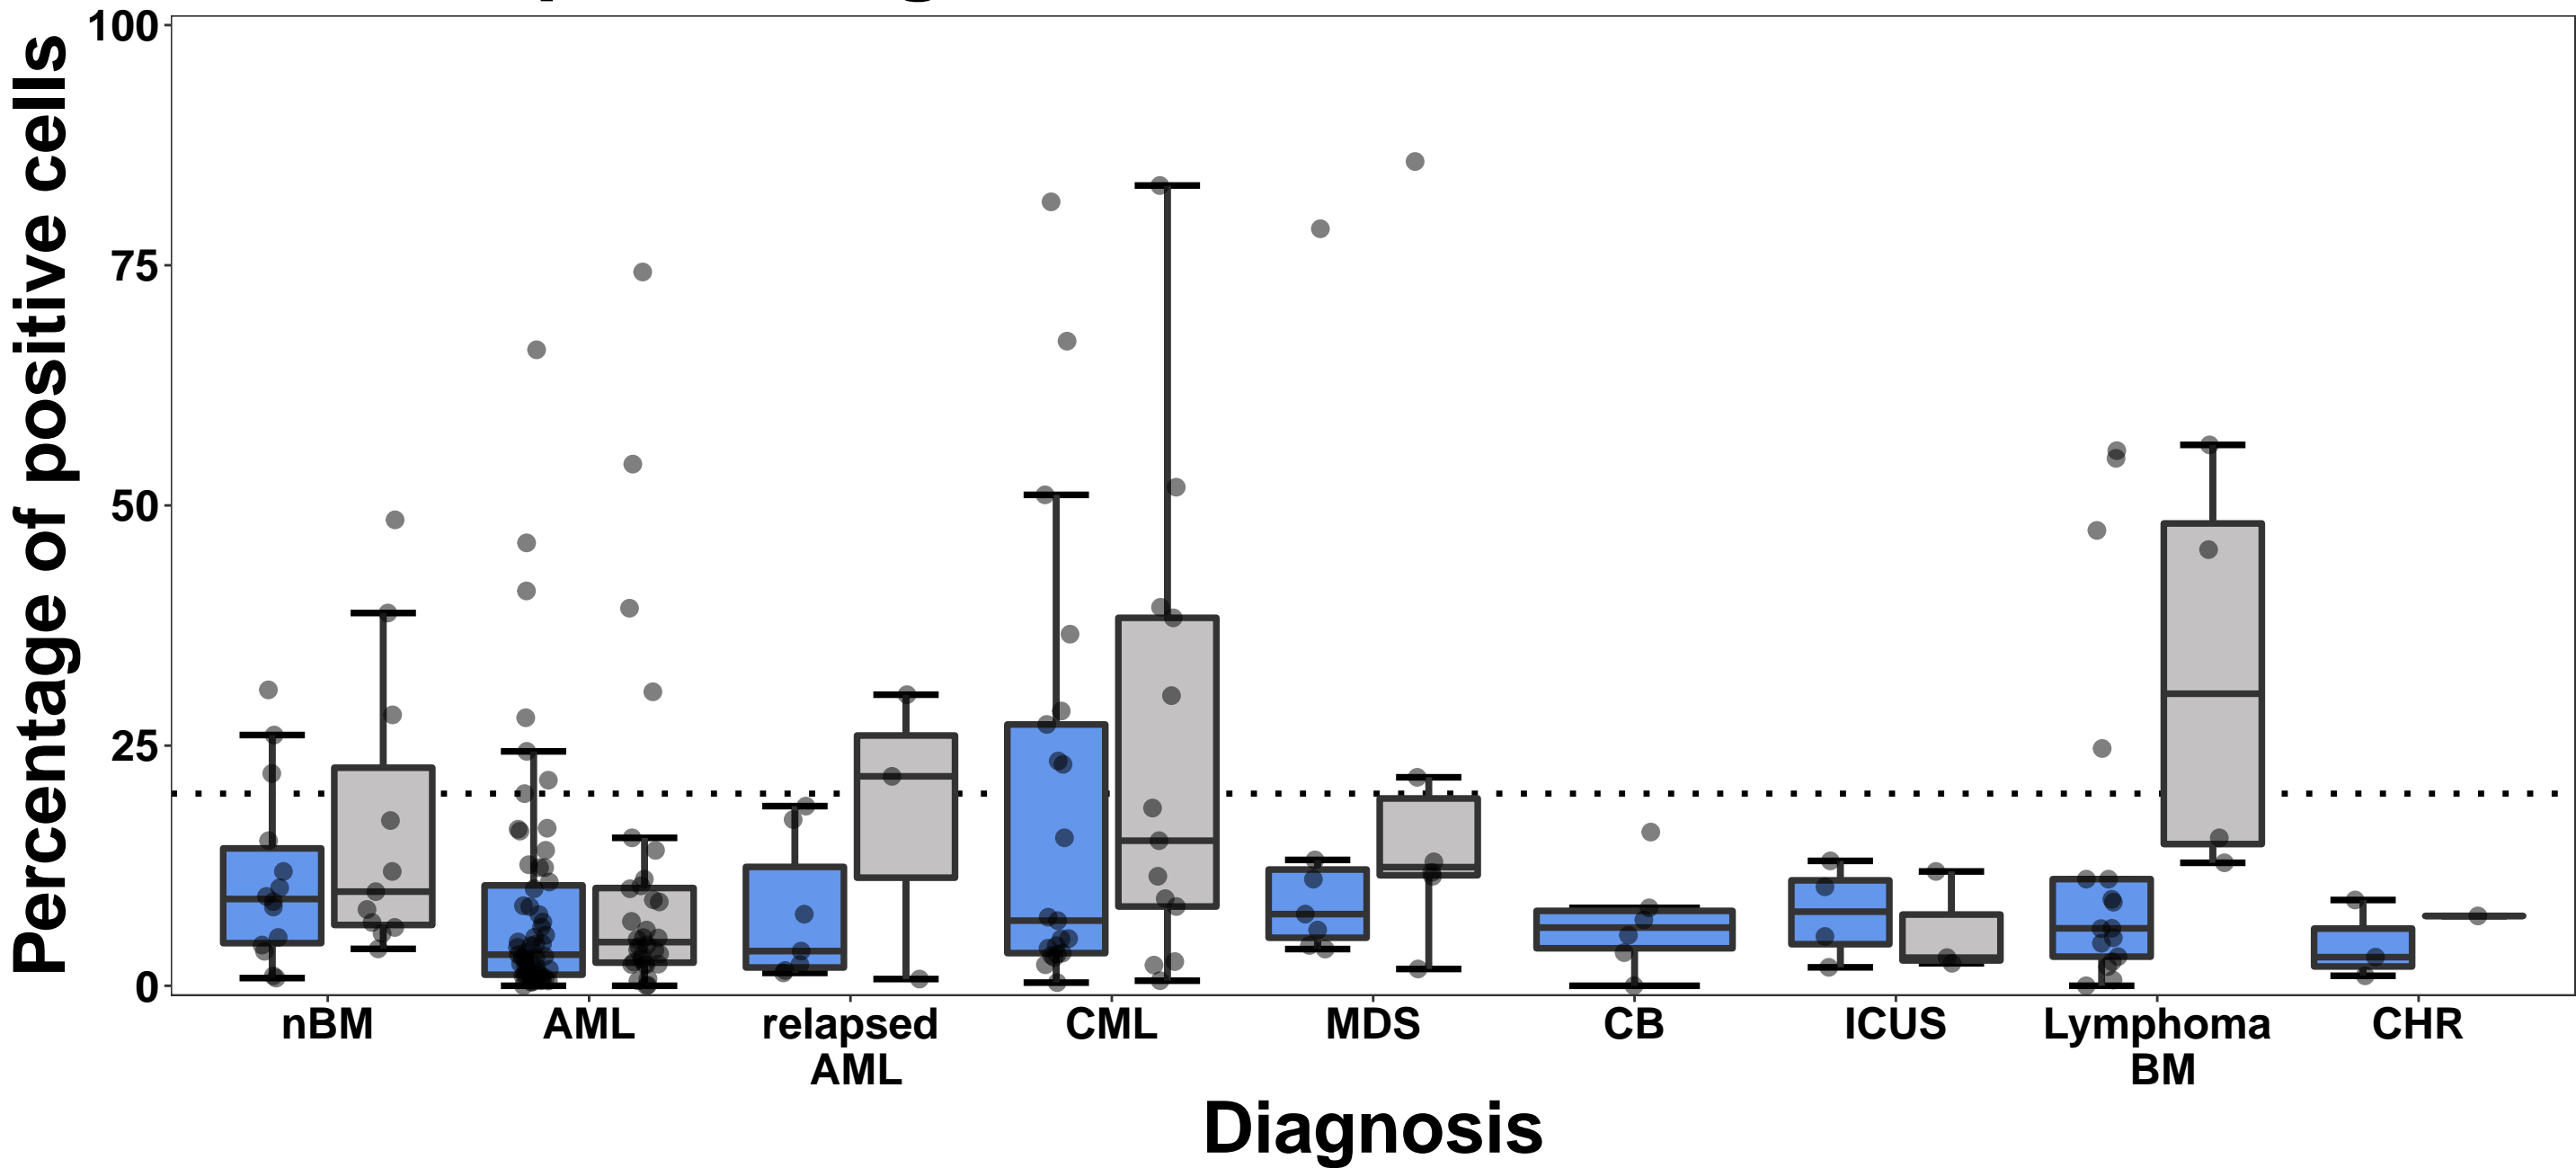

Cell fraction  CD34+/CD38-  CD34+/CD38+

# CD52 staining index

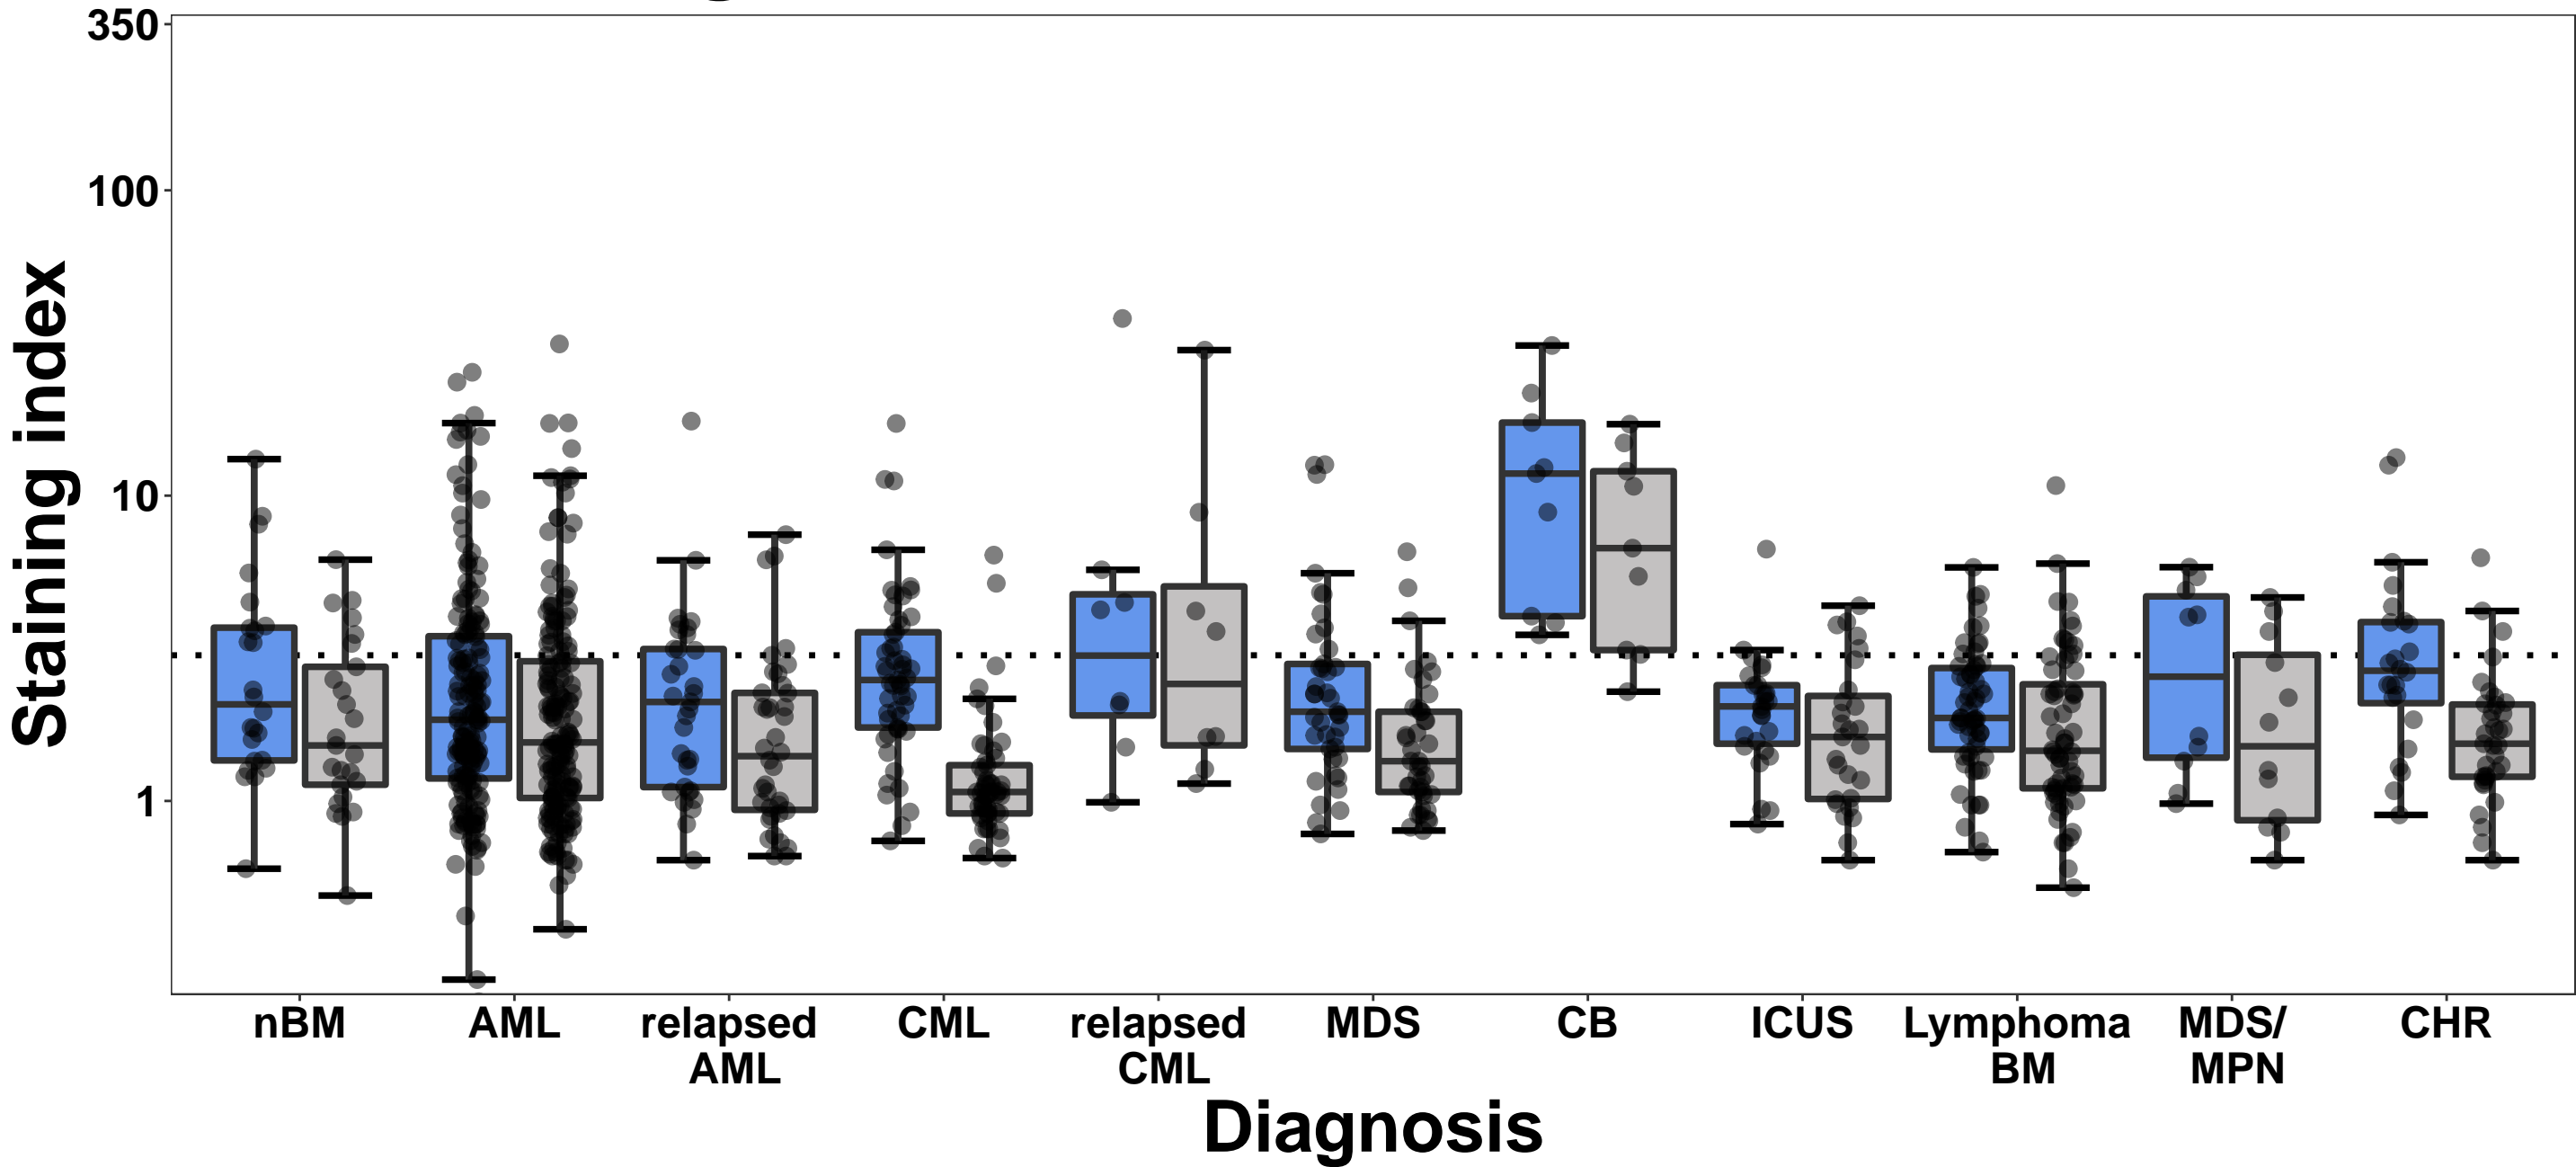

Cell fraction  CD34+/CD38-  CD34+/CD38+

# CD52 percentage

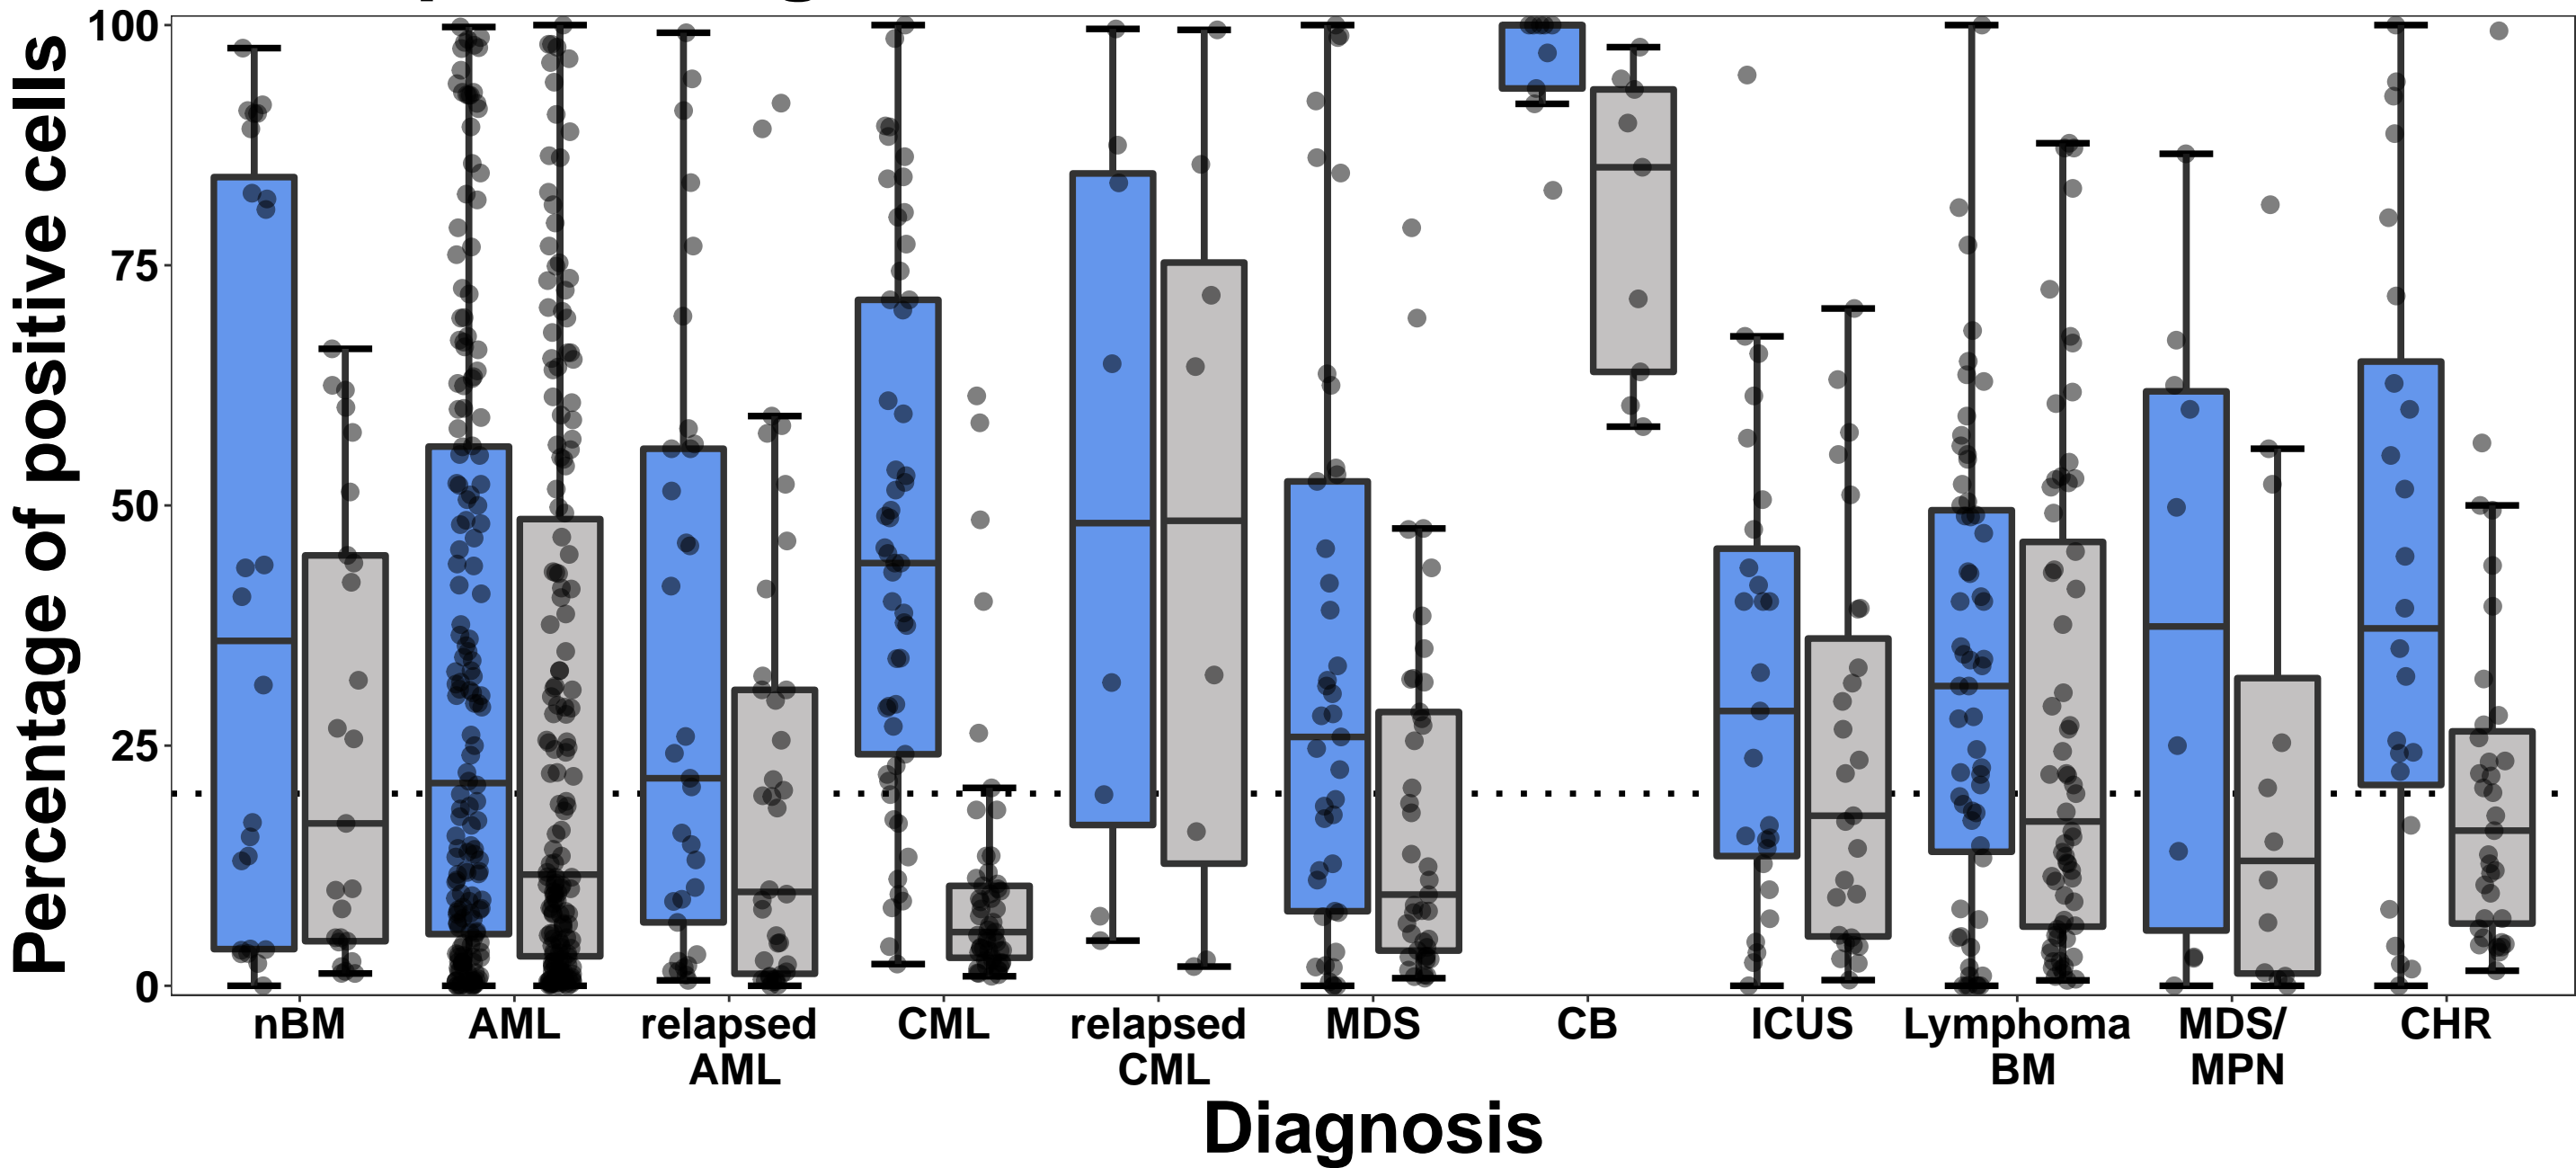

Cell fraction  CD34+/CD38-  CD34+/CD38+

# CD56 staining index

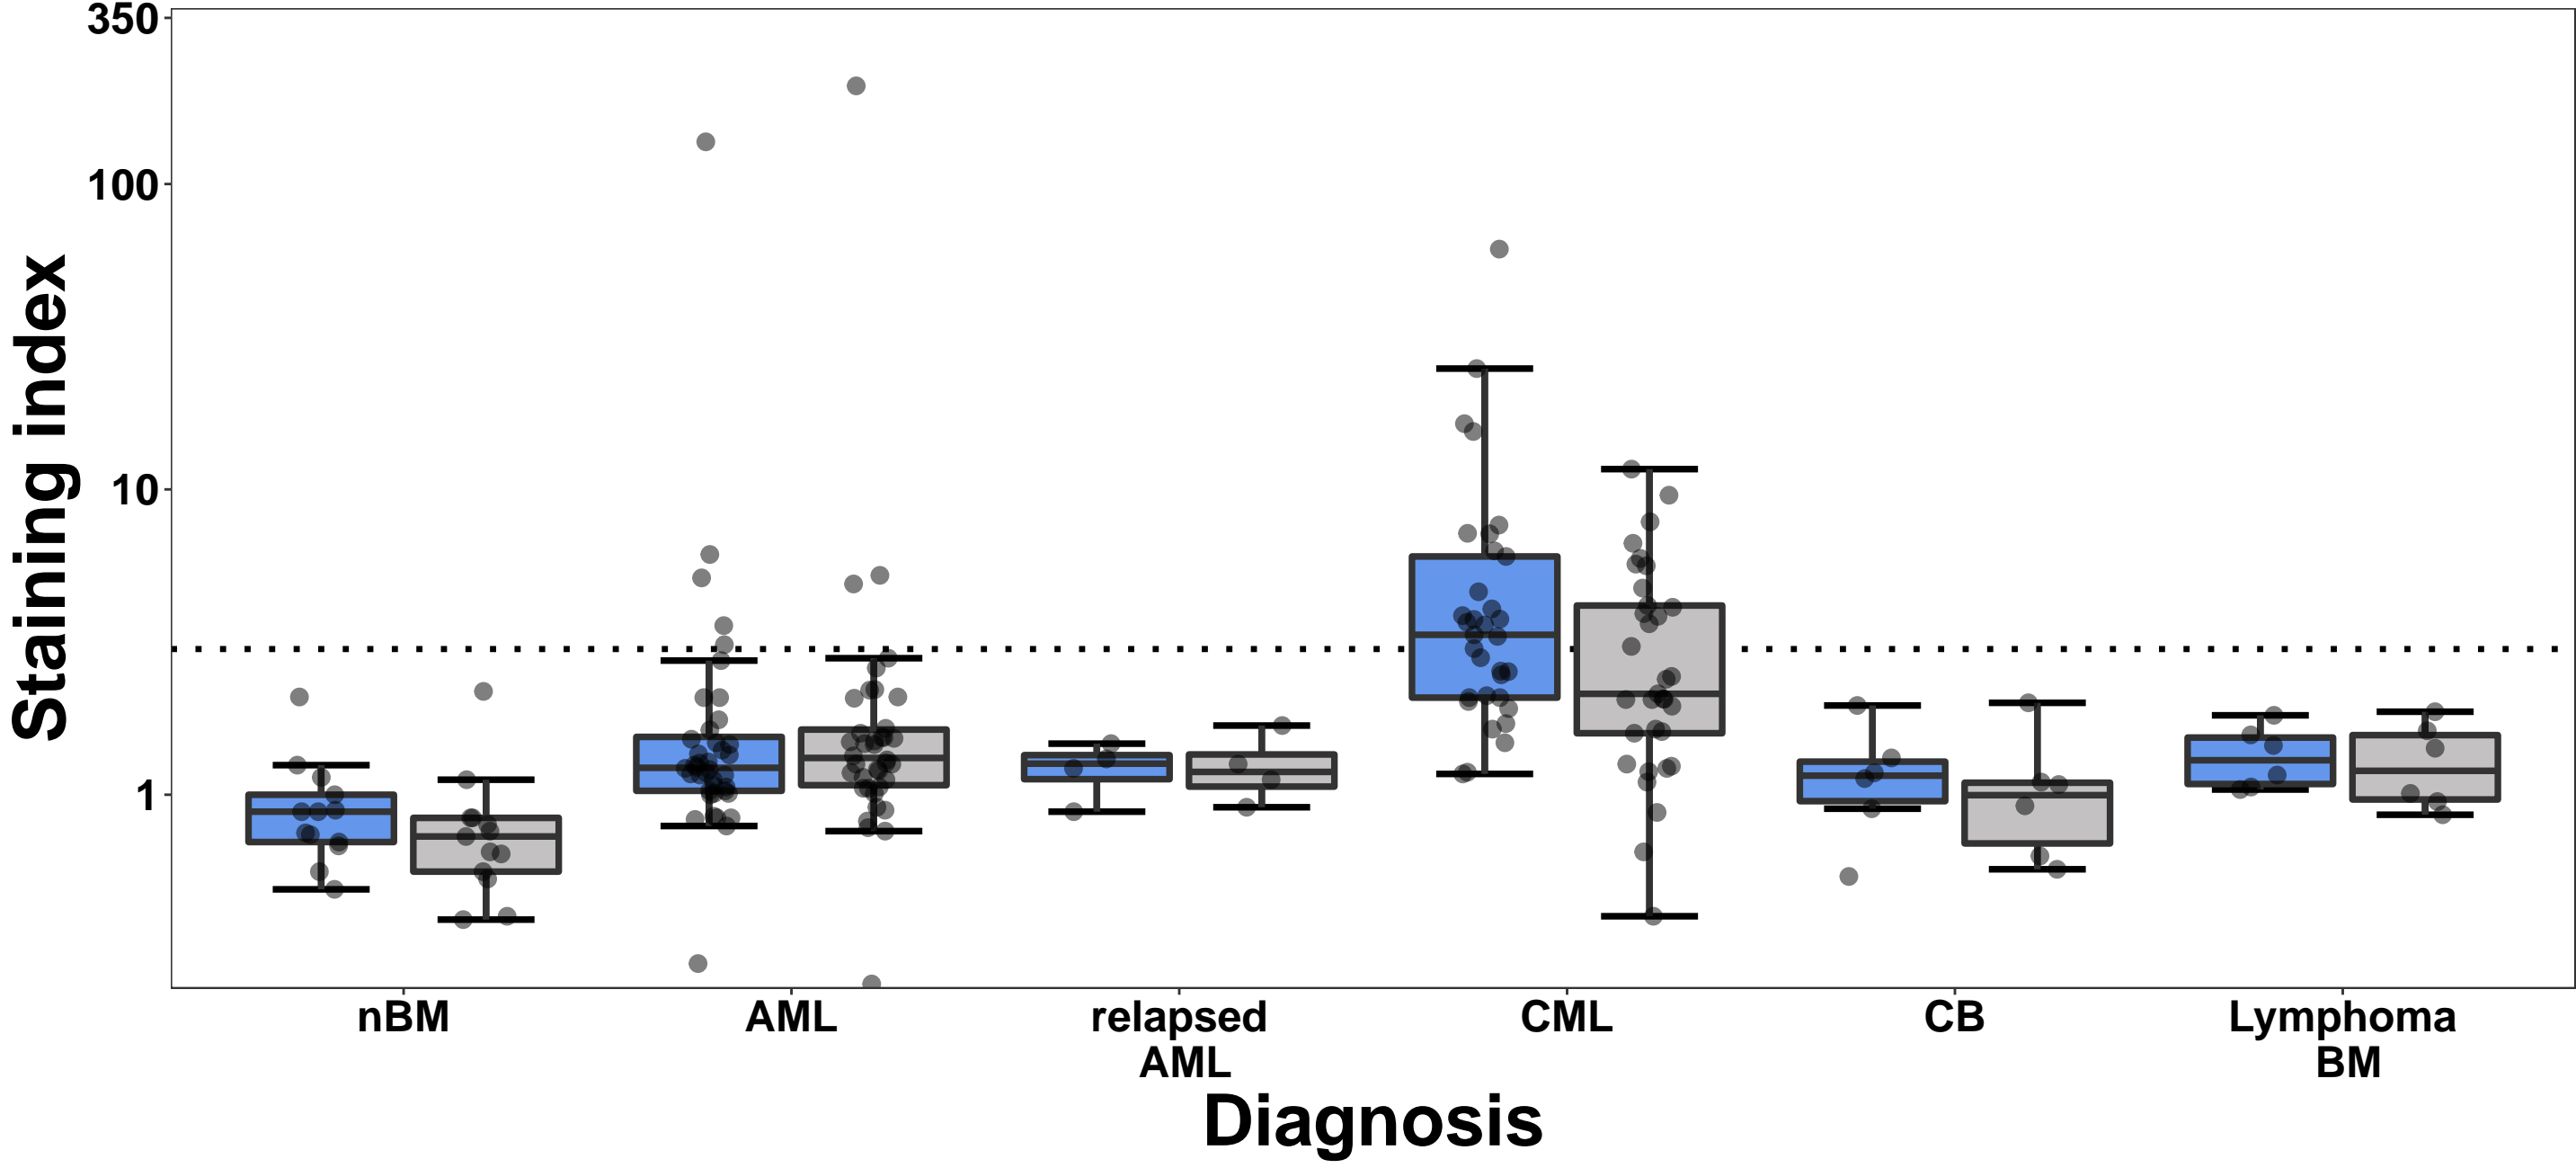

Cell fraction  CD34+/CD38-  CD34+/CD38+

# CD56 percentage

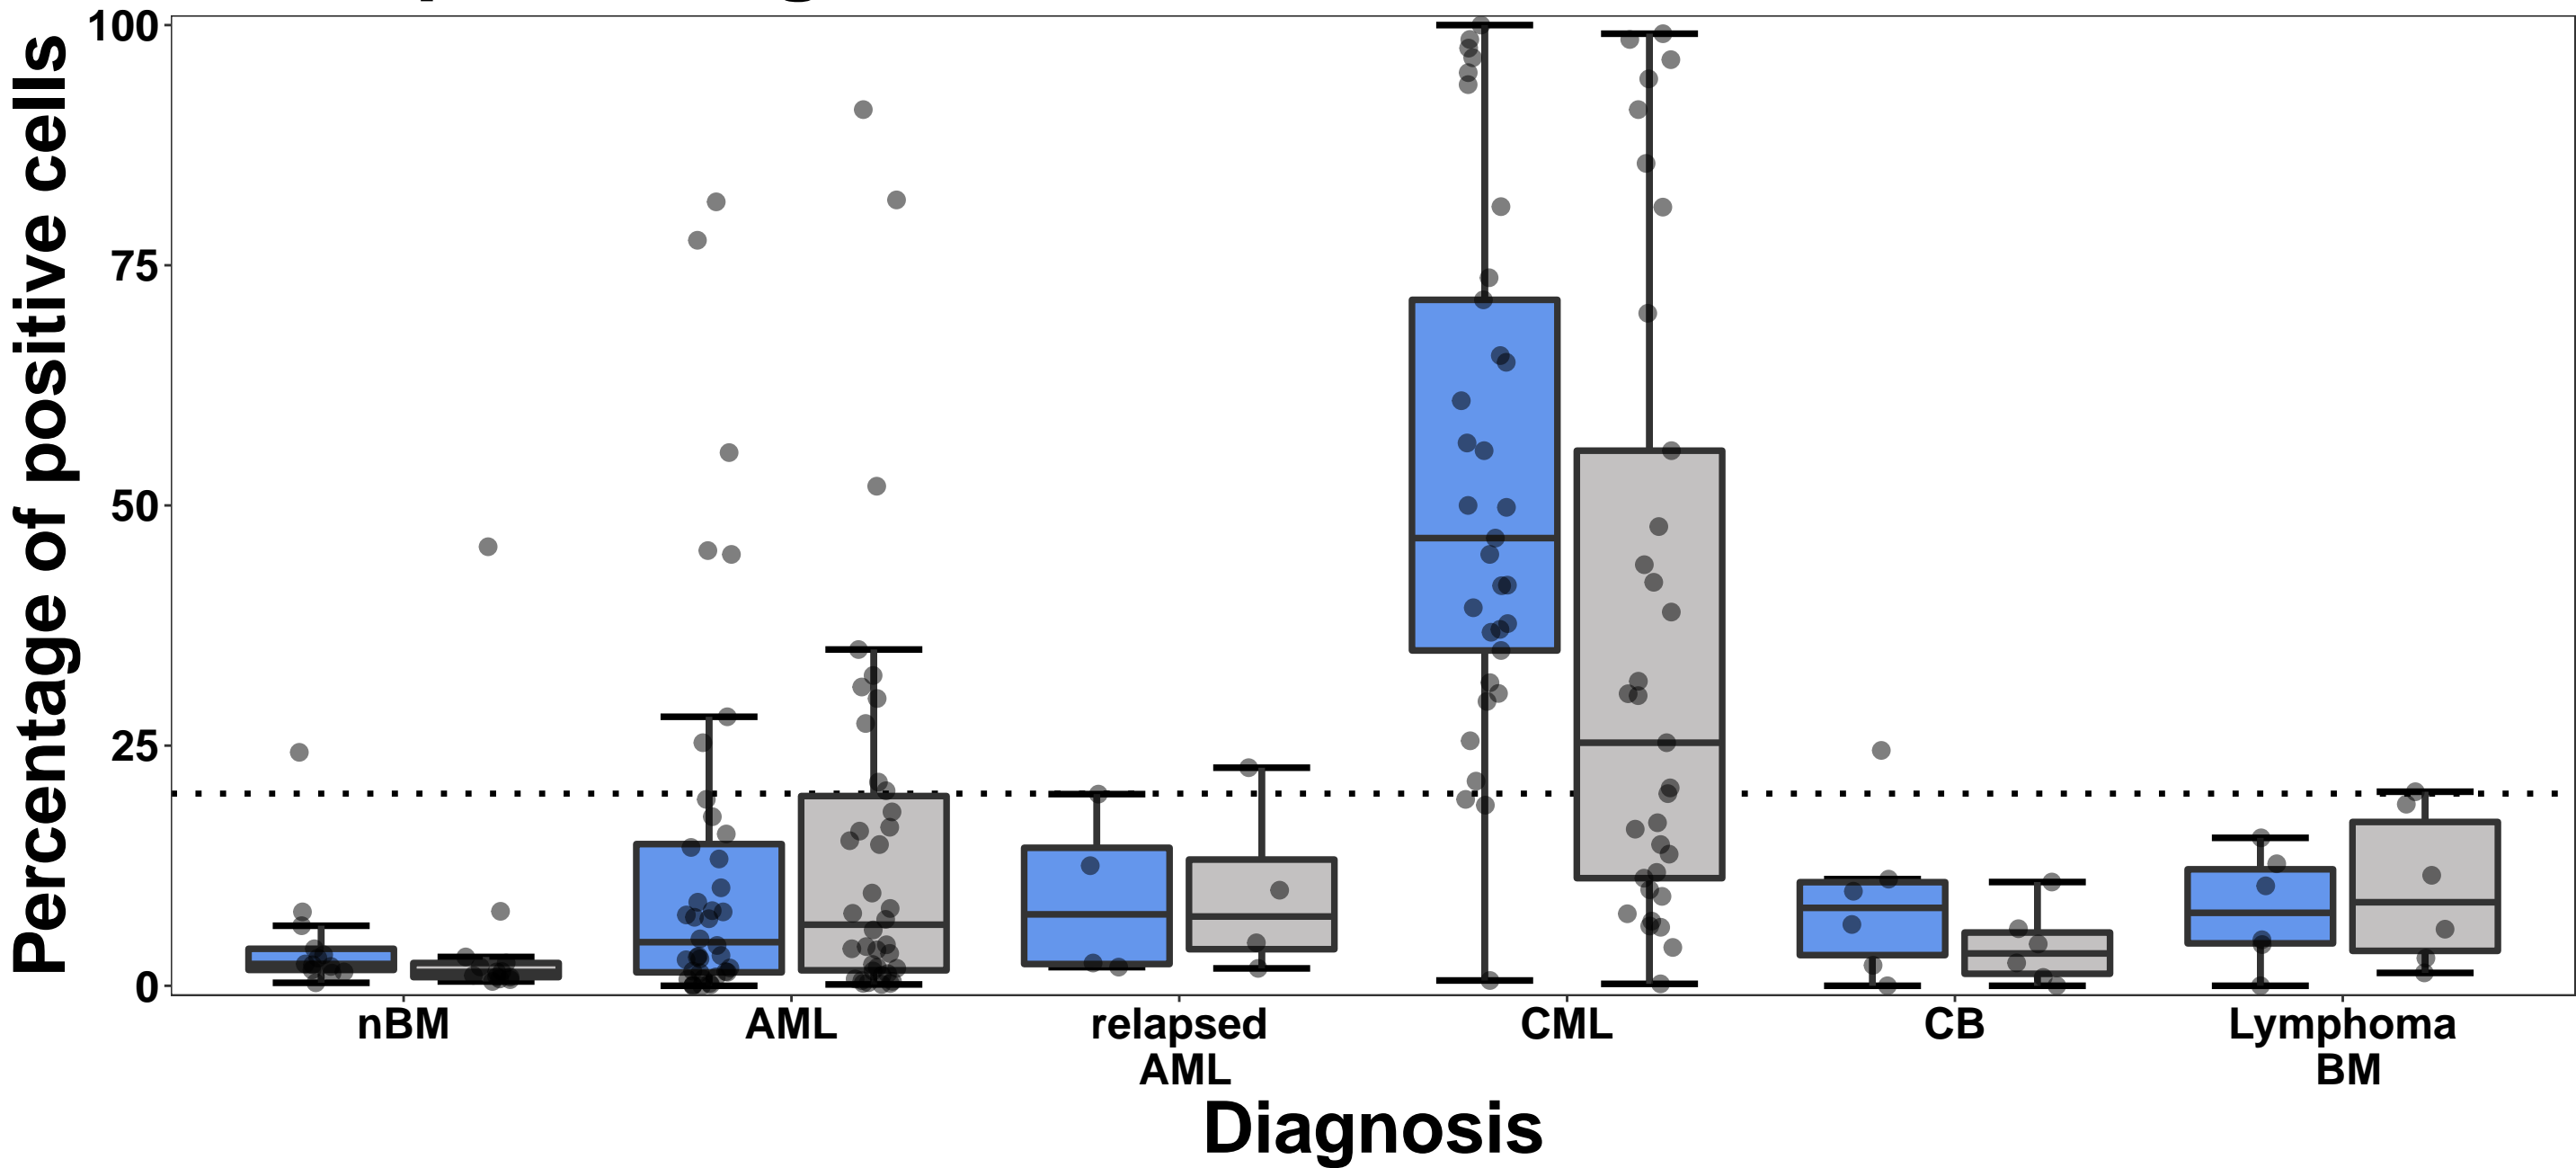

Cell fraction  CD34+/CD38-  CD34+/CD38+

# CD61 staining index

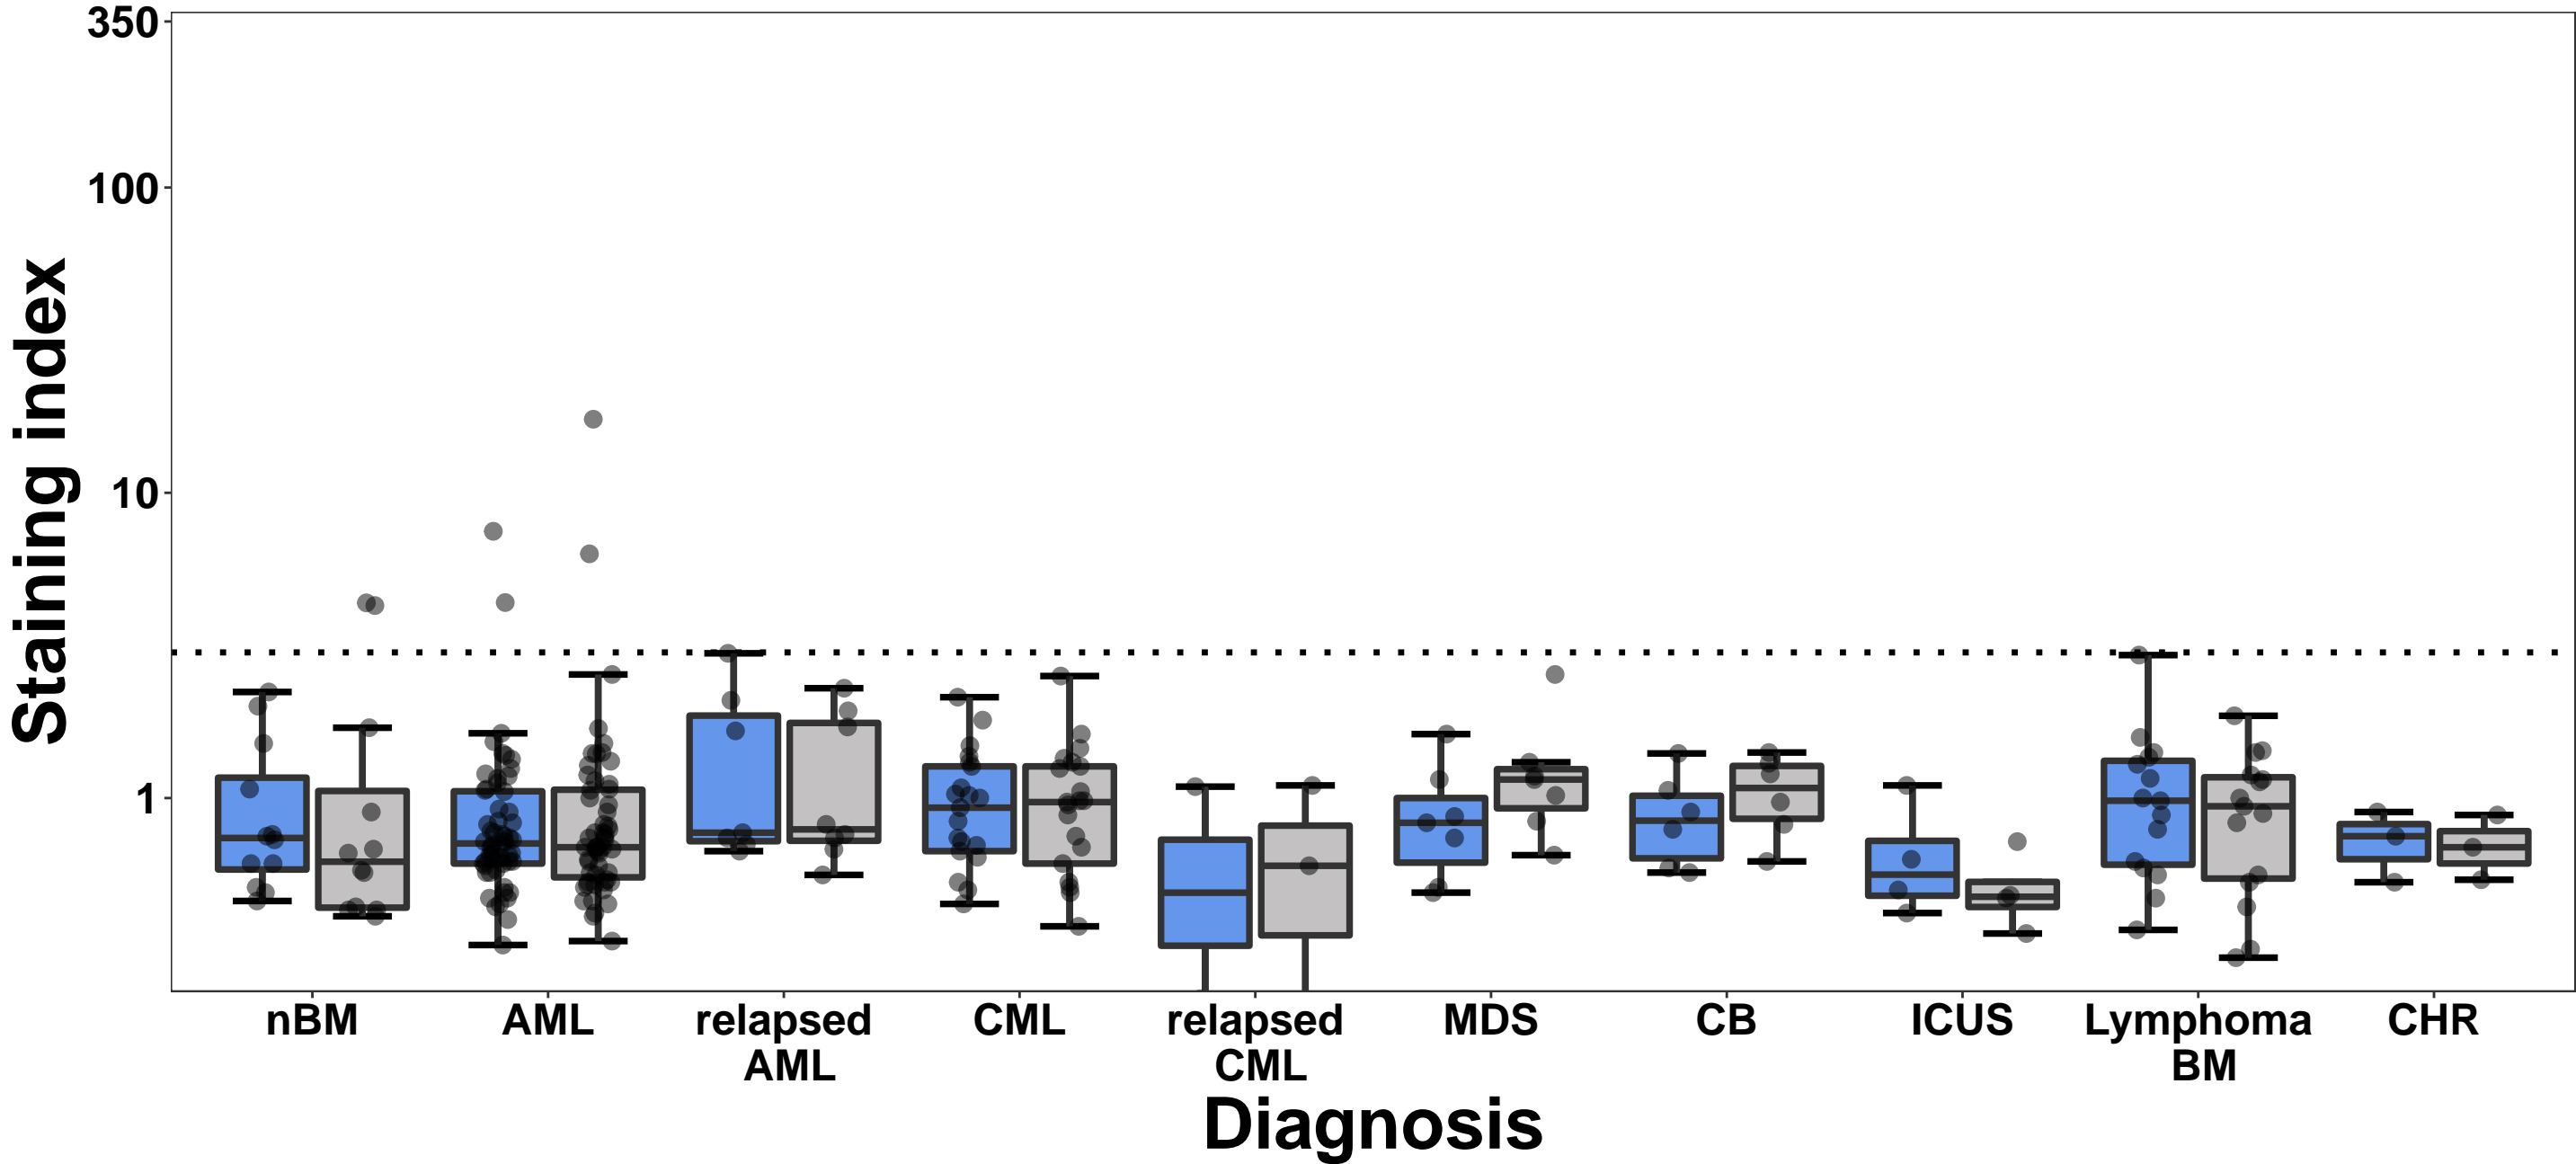



Cell fraction  CD34+/CD38-  CD34+/CD38+

# CD61 percentage

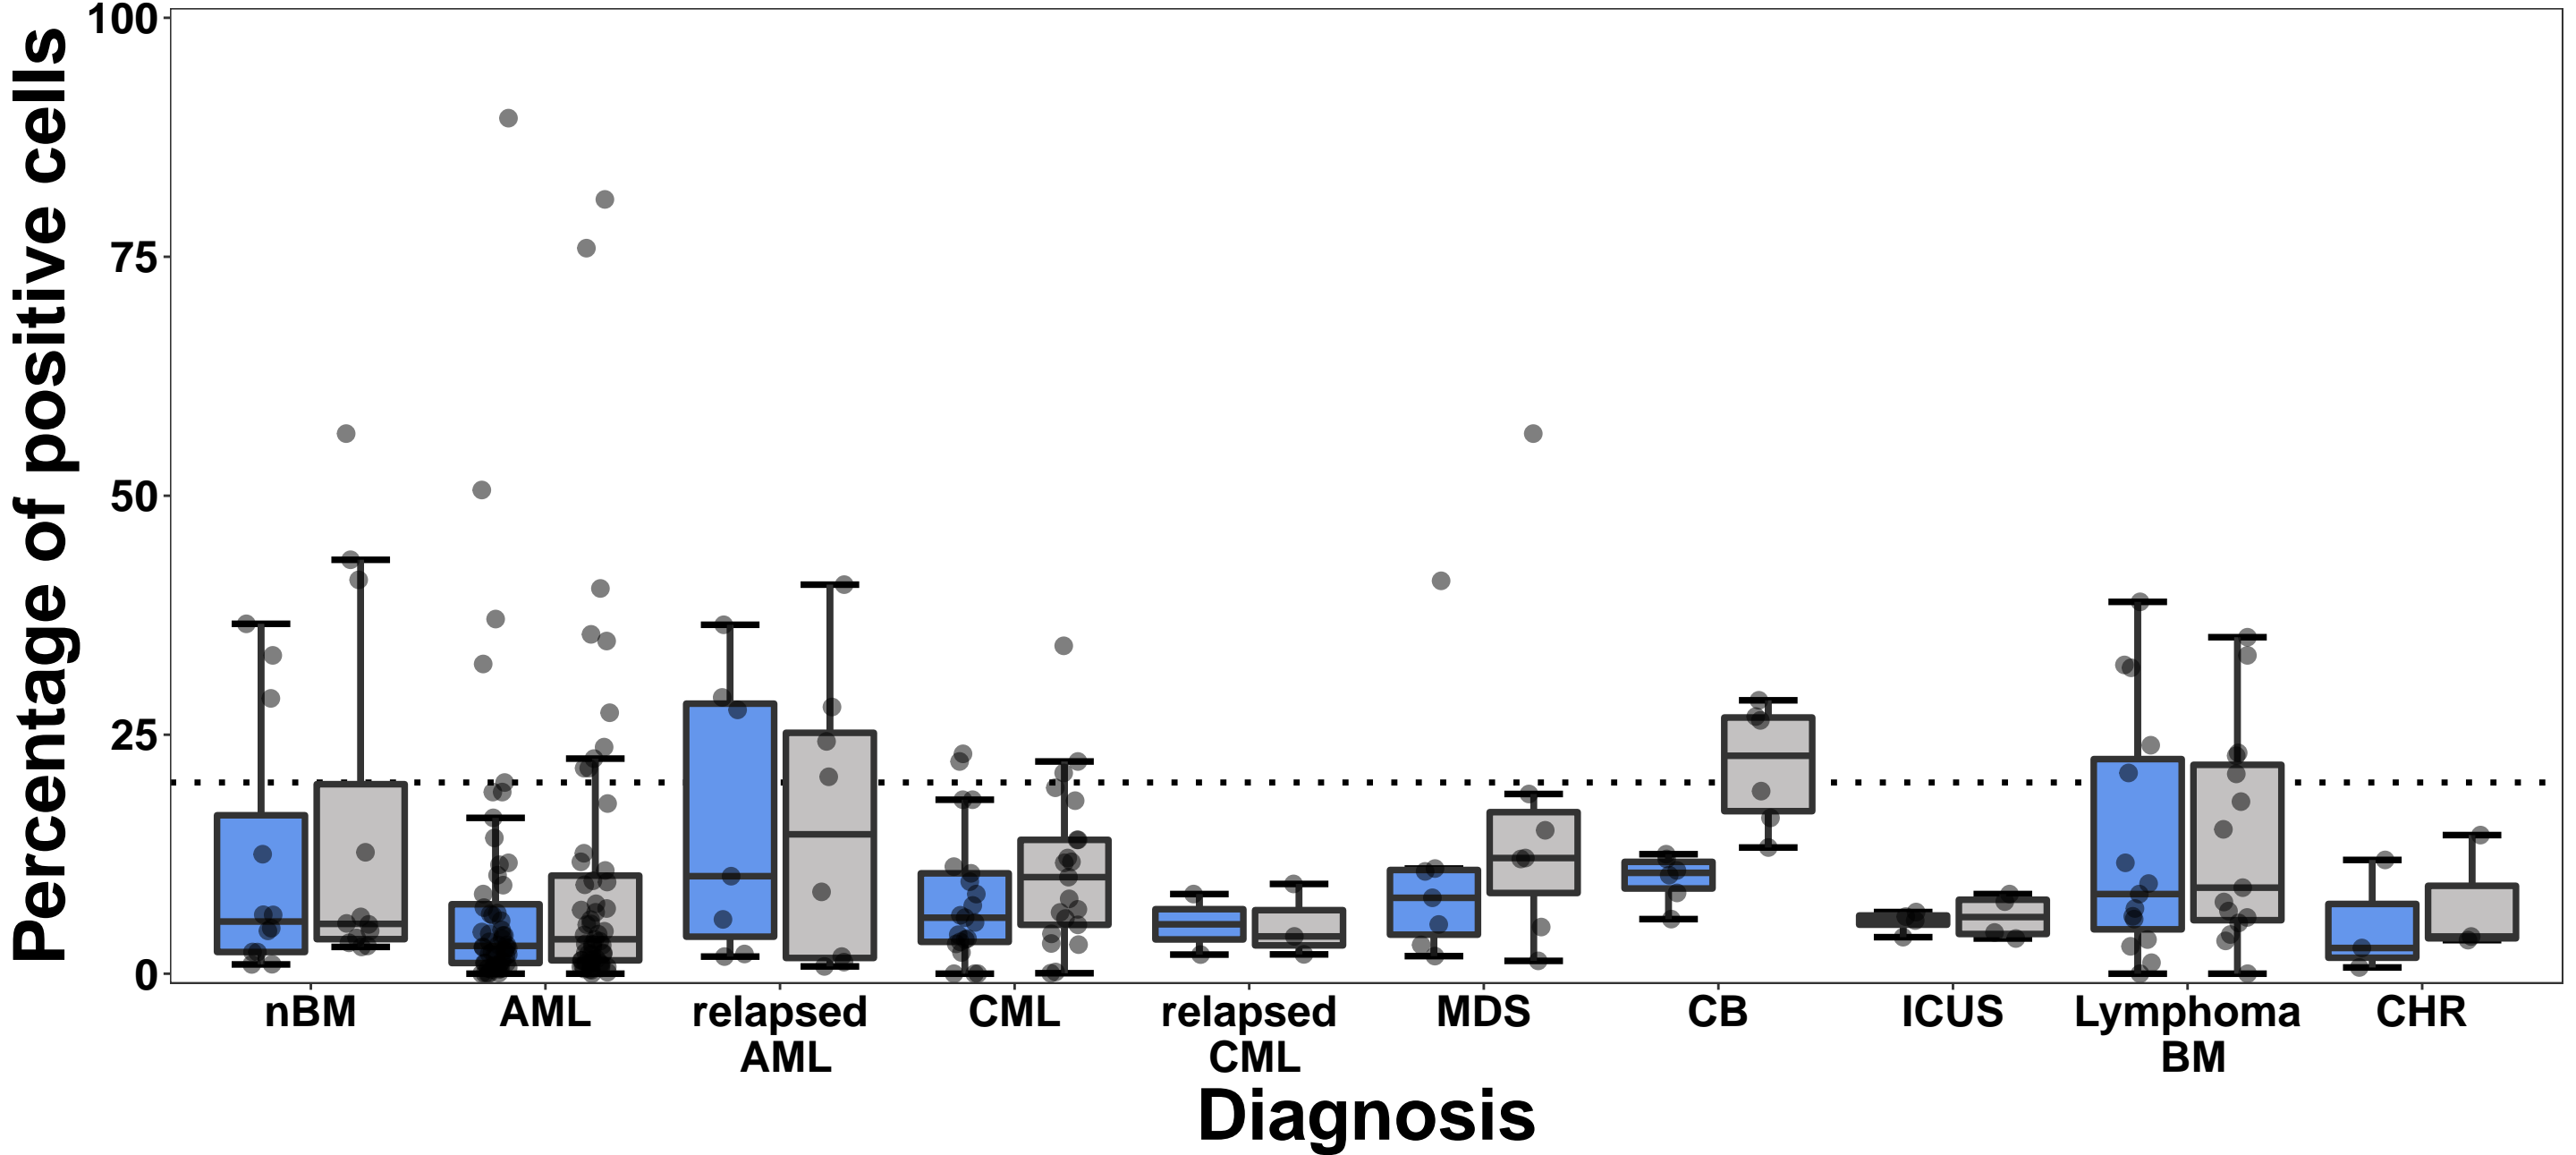

Cell fraction  CD34+/CD38-  CD34+/CD38+

# CD62P staining index

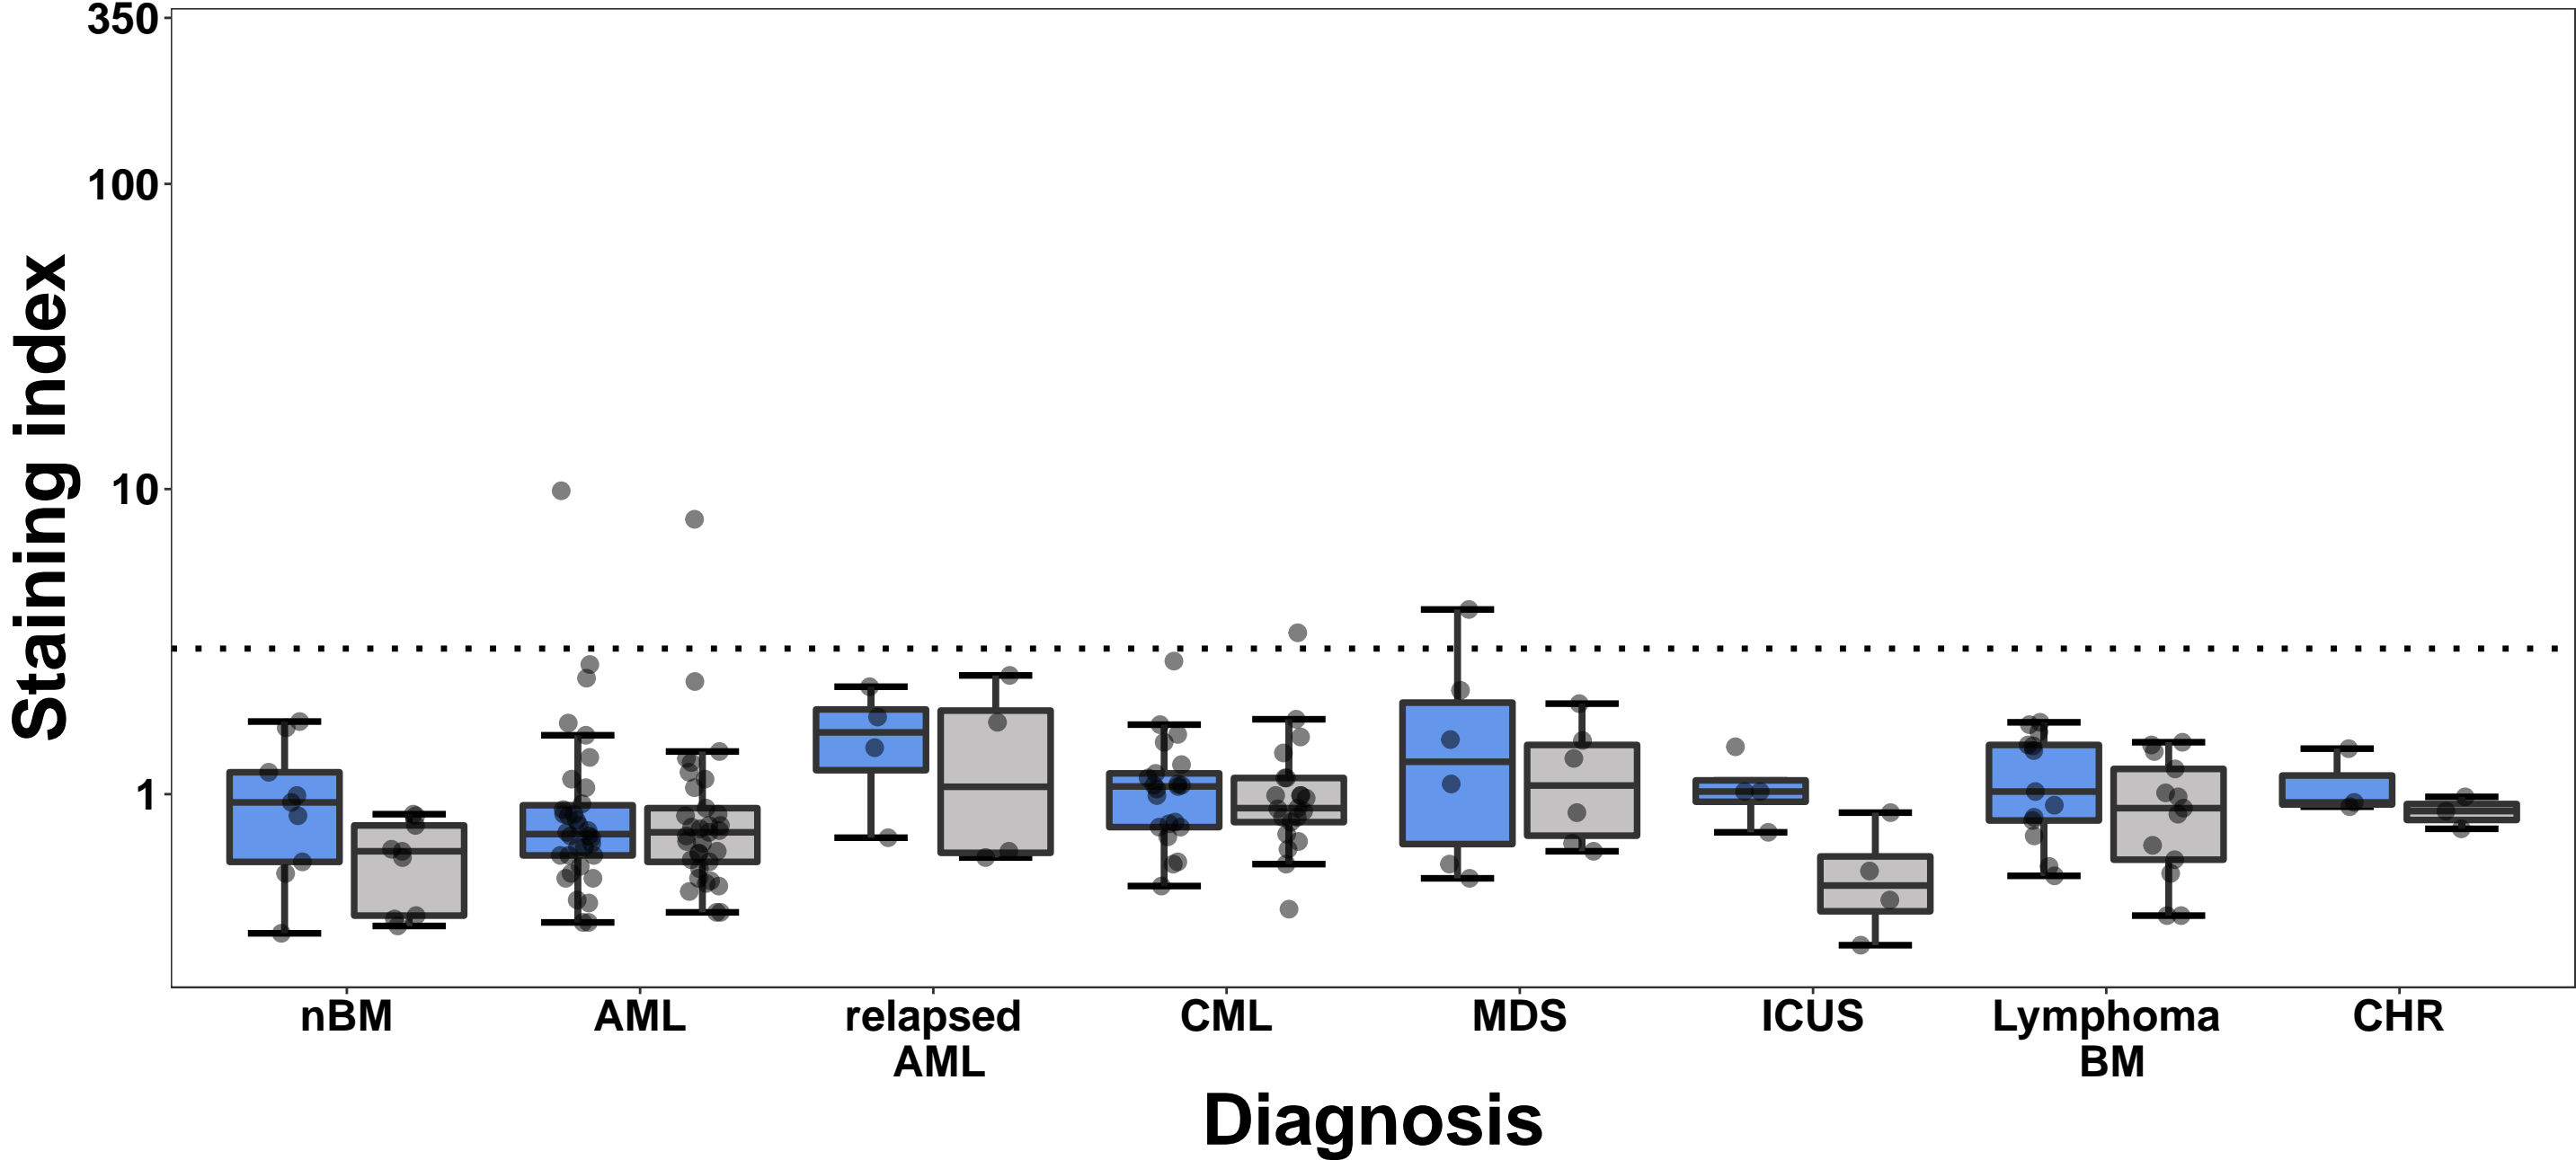

Cell fraction  CD34+/CD38-  CD34+/CD38+

# CD62P percentage

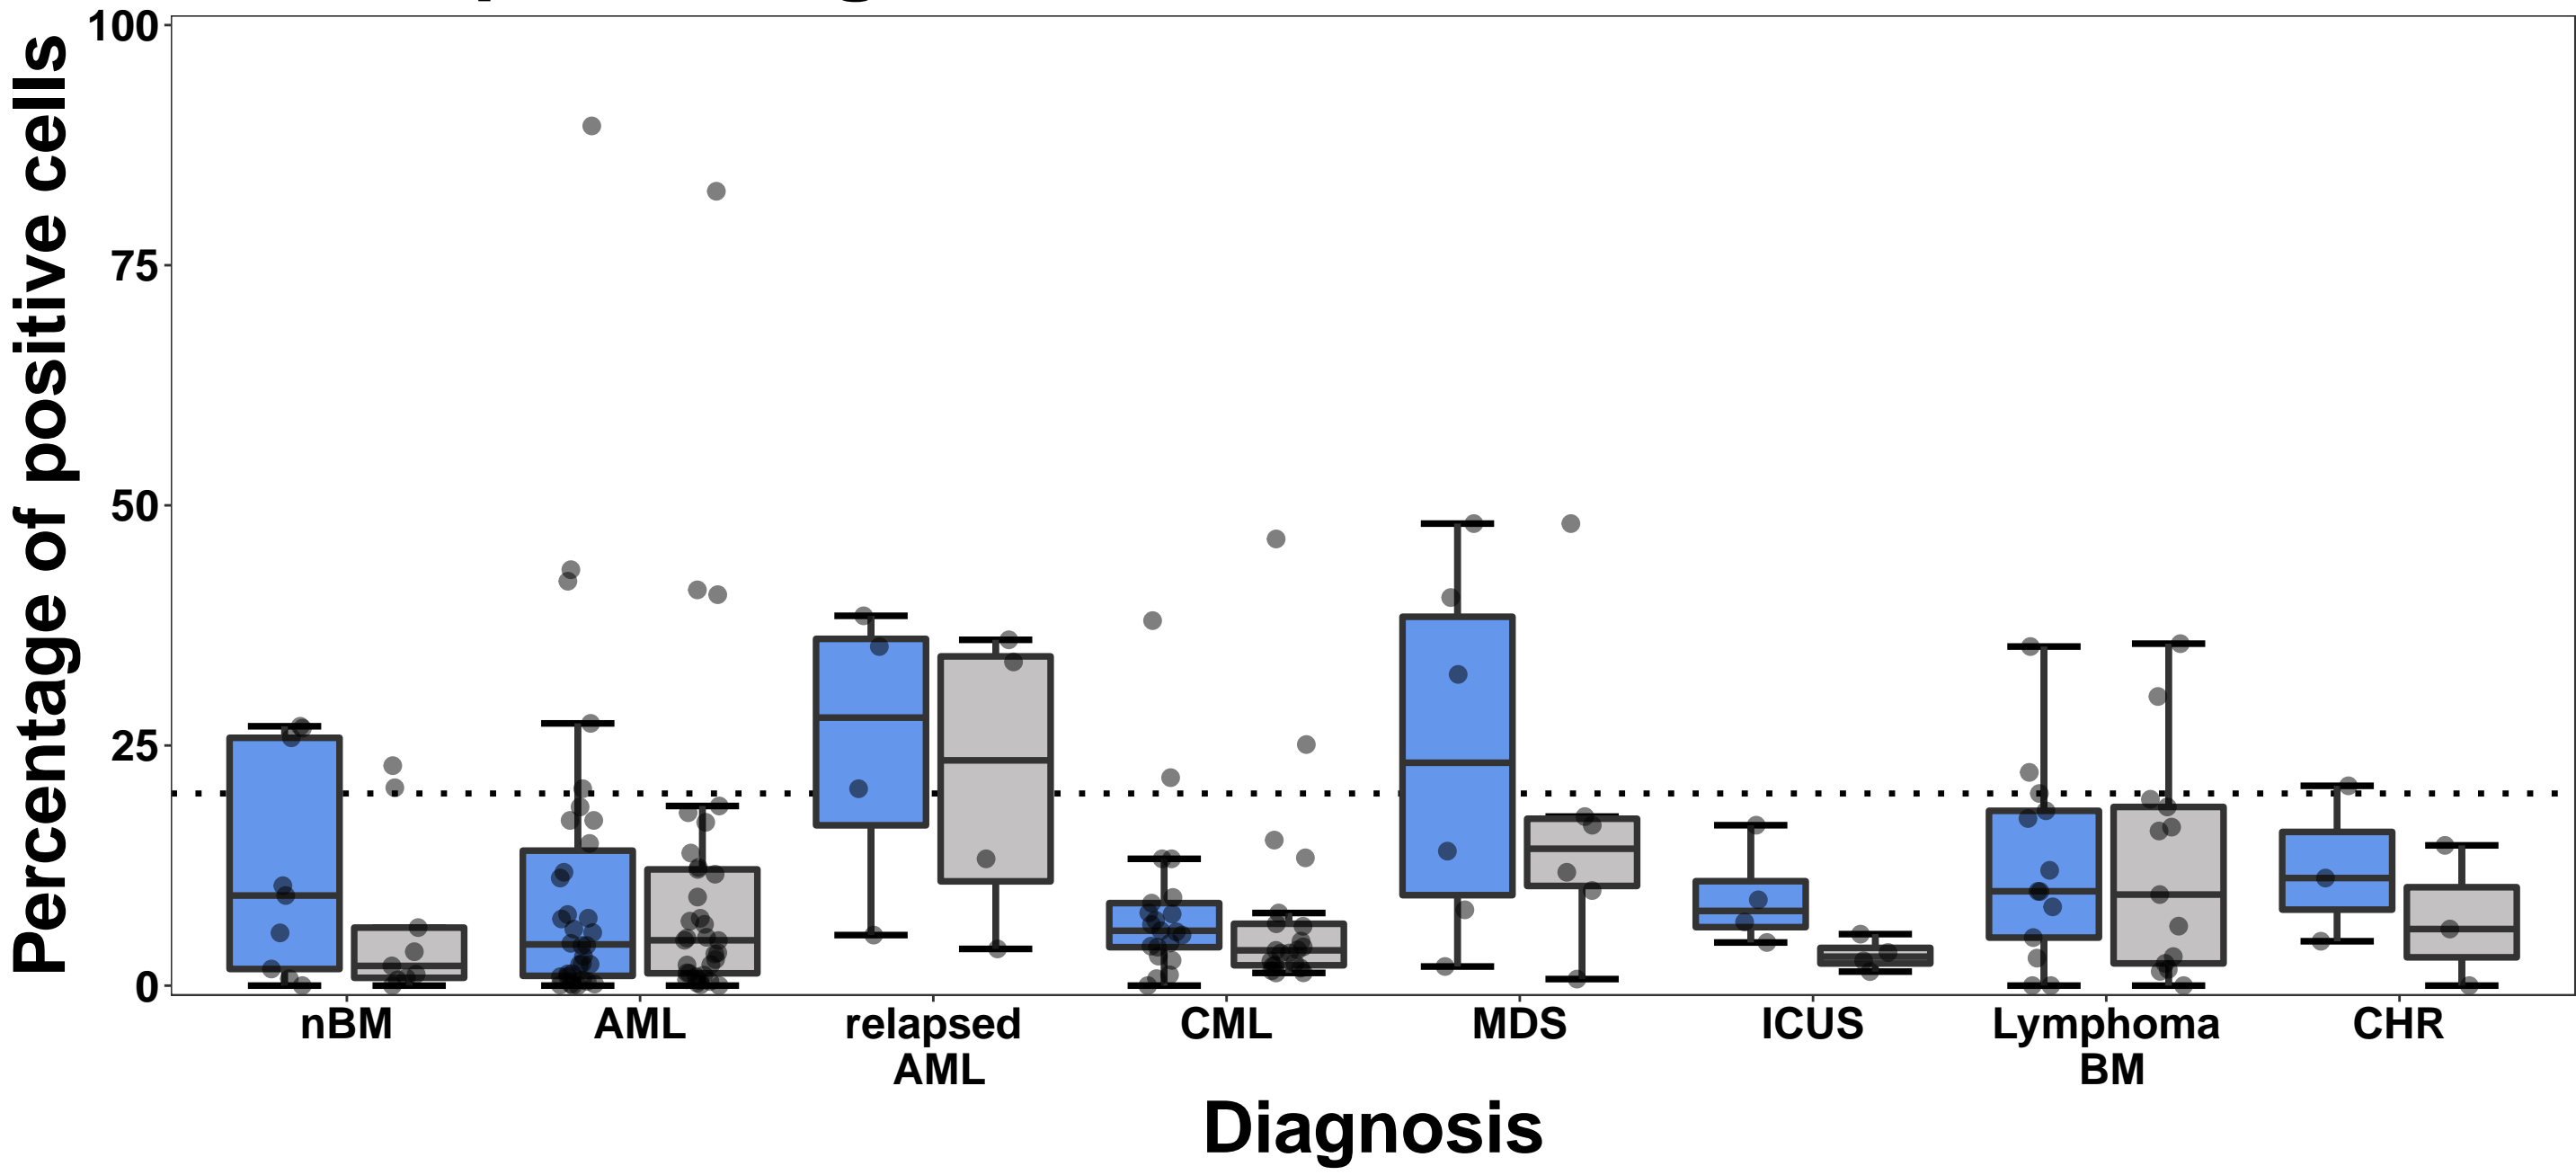

# CD69 staining index

Cell fraction  CD34+/CD38-  CD34+/CD38+

Staining index

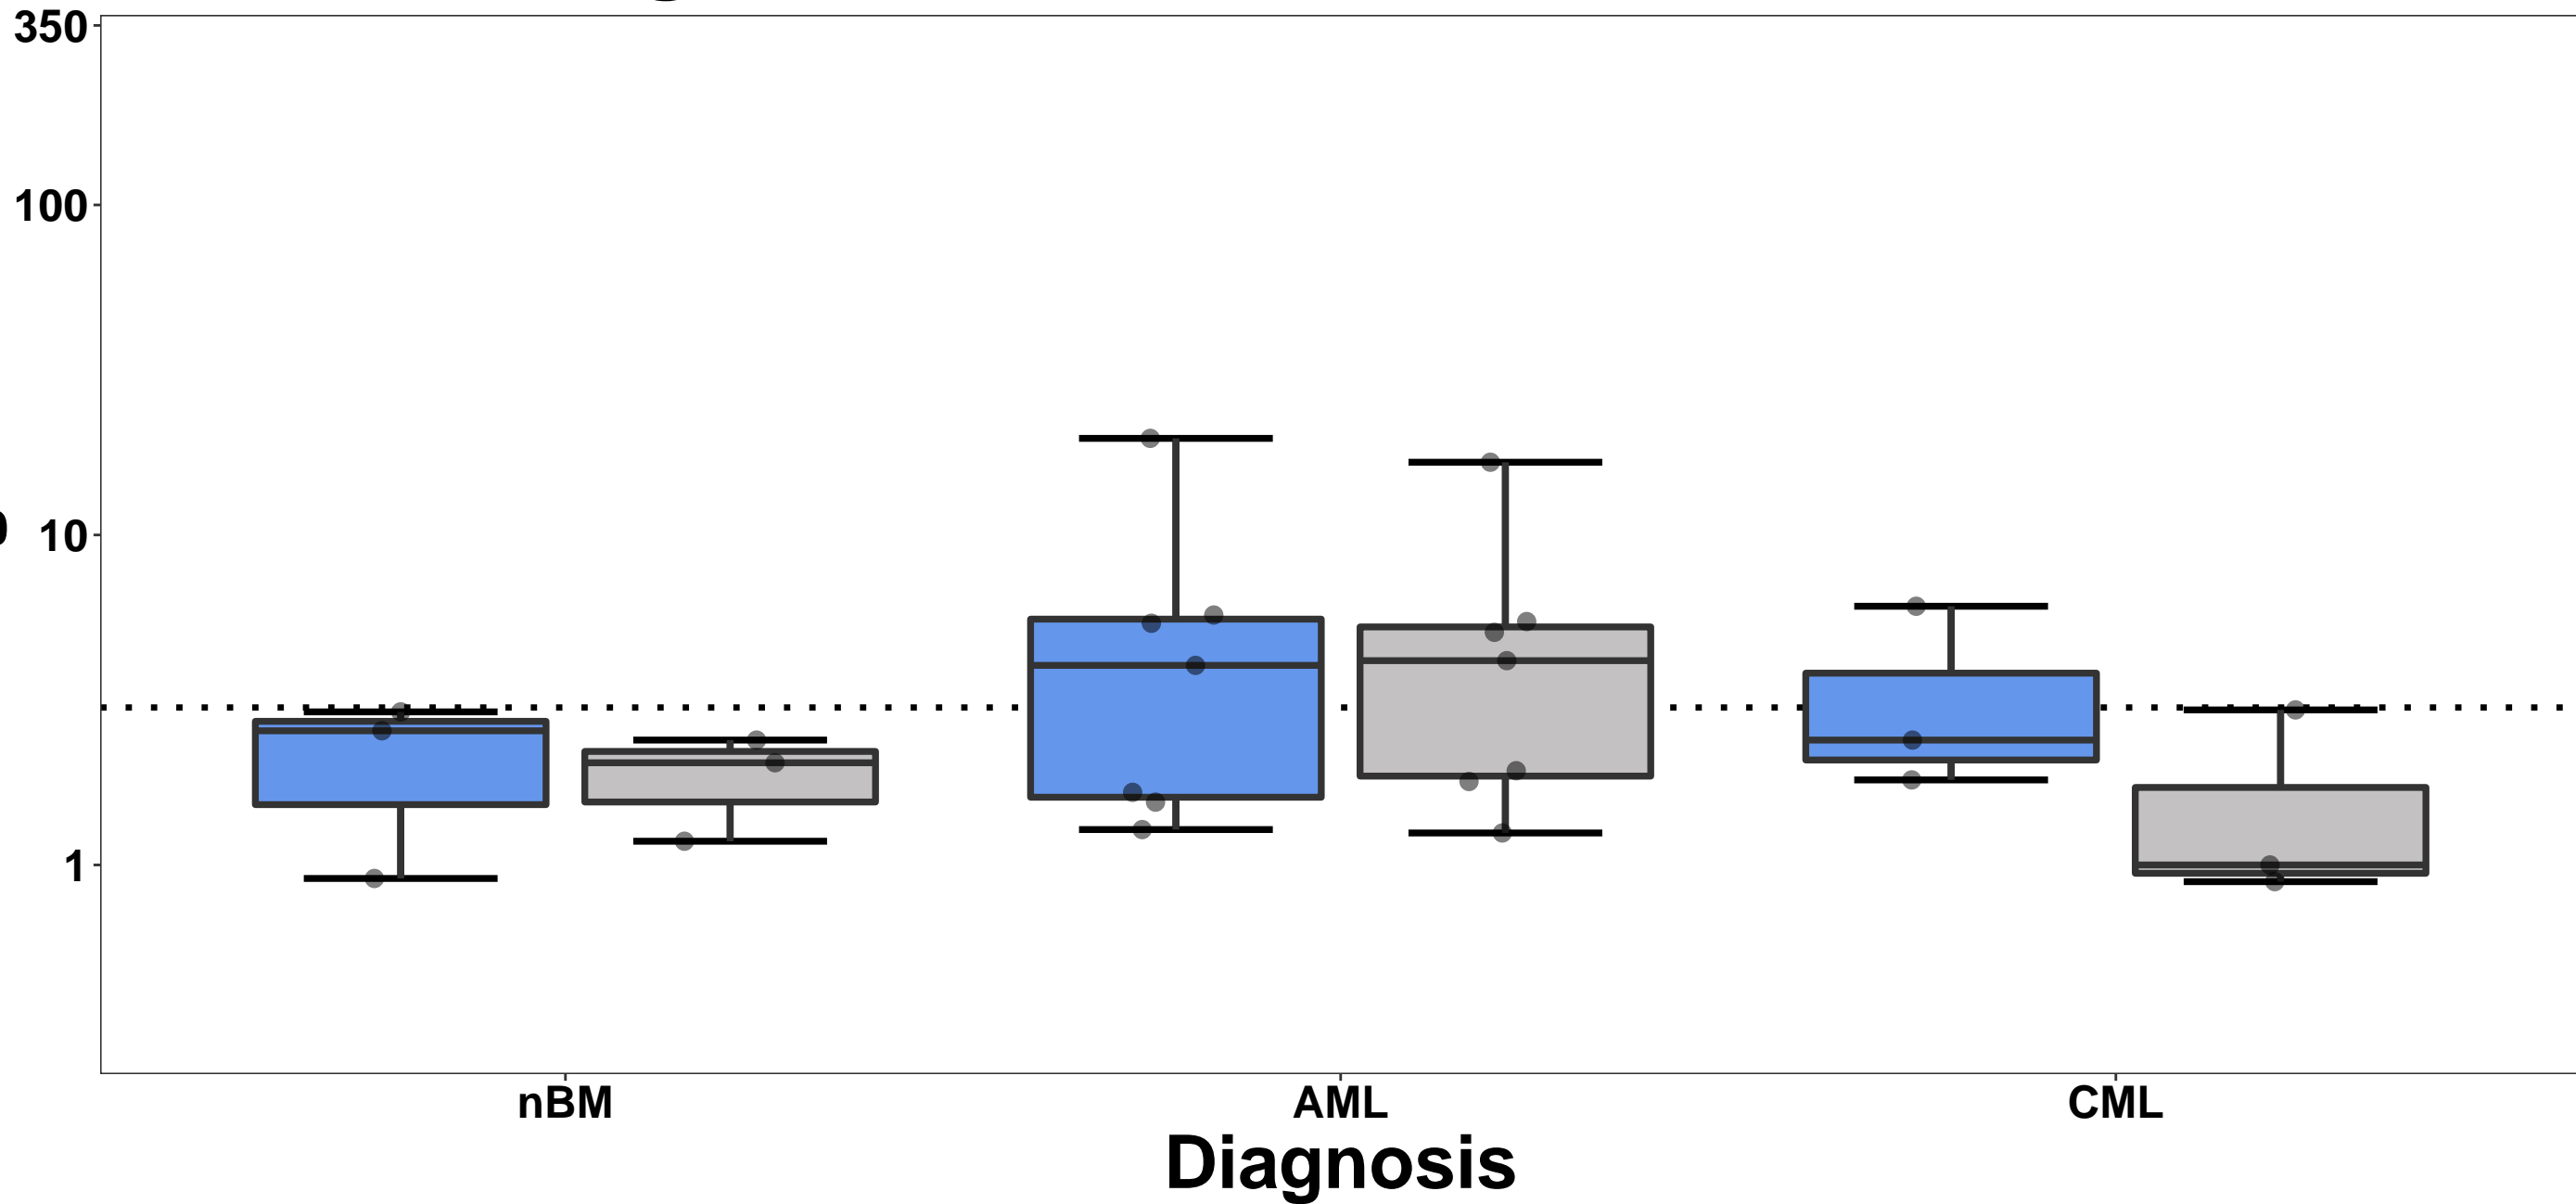

Cell fraction  CD34+/CD38-  CD34+/CD38+

# CD69 percentage

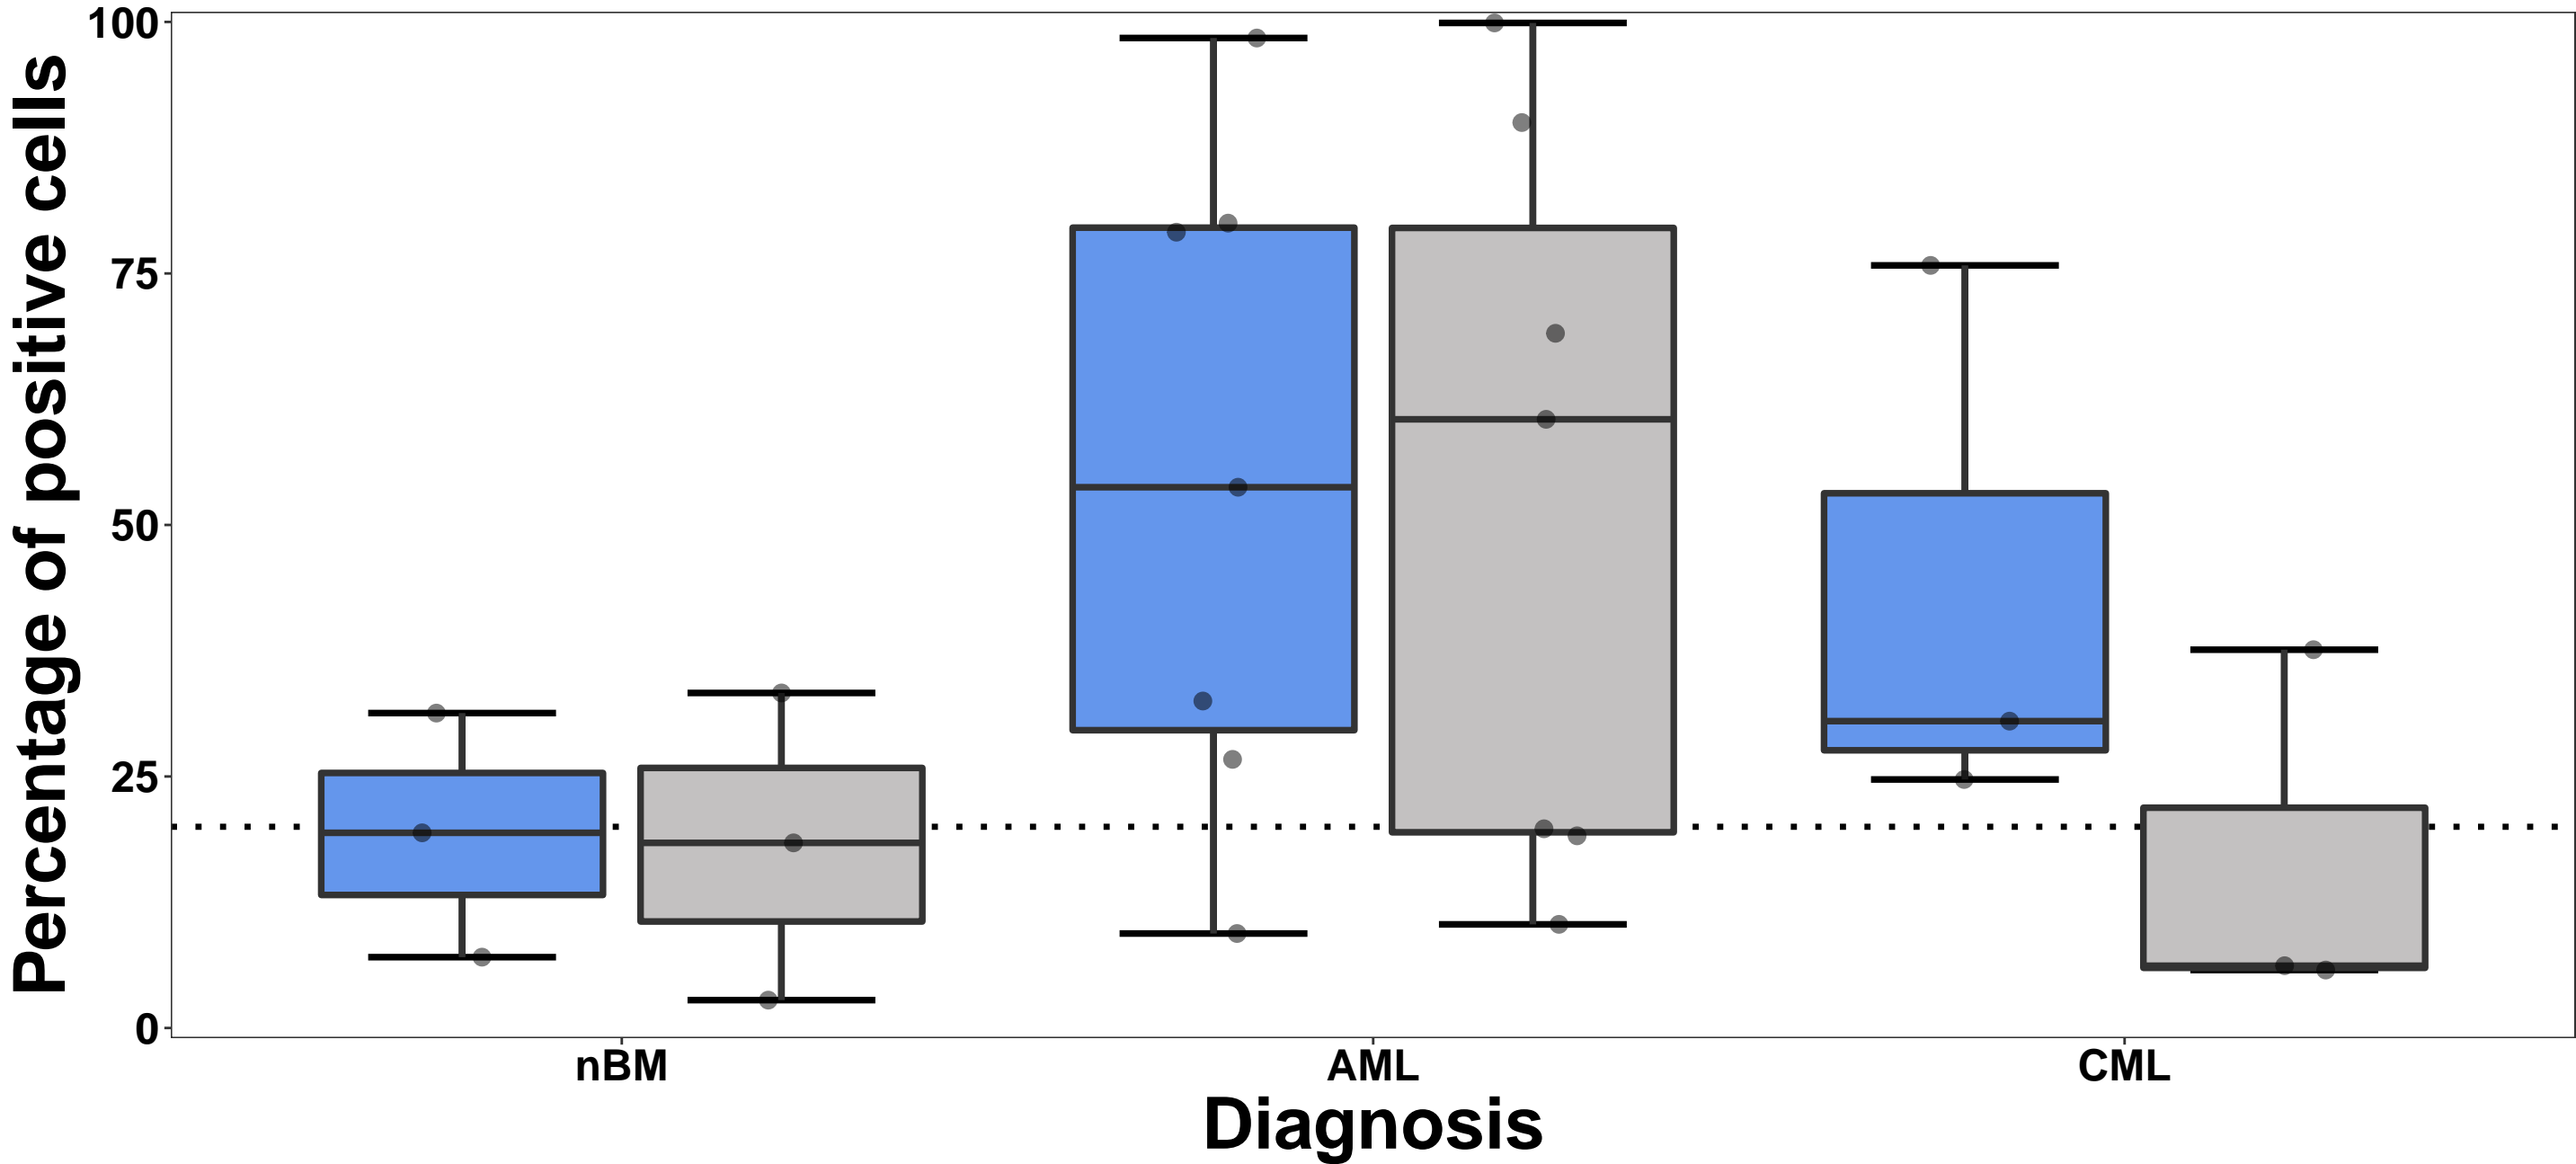

Cell fraction  CD34+/CD38-  CD34+/CD38+

# CD90 staining index

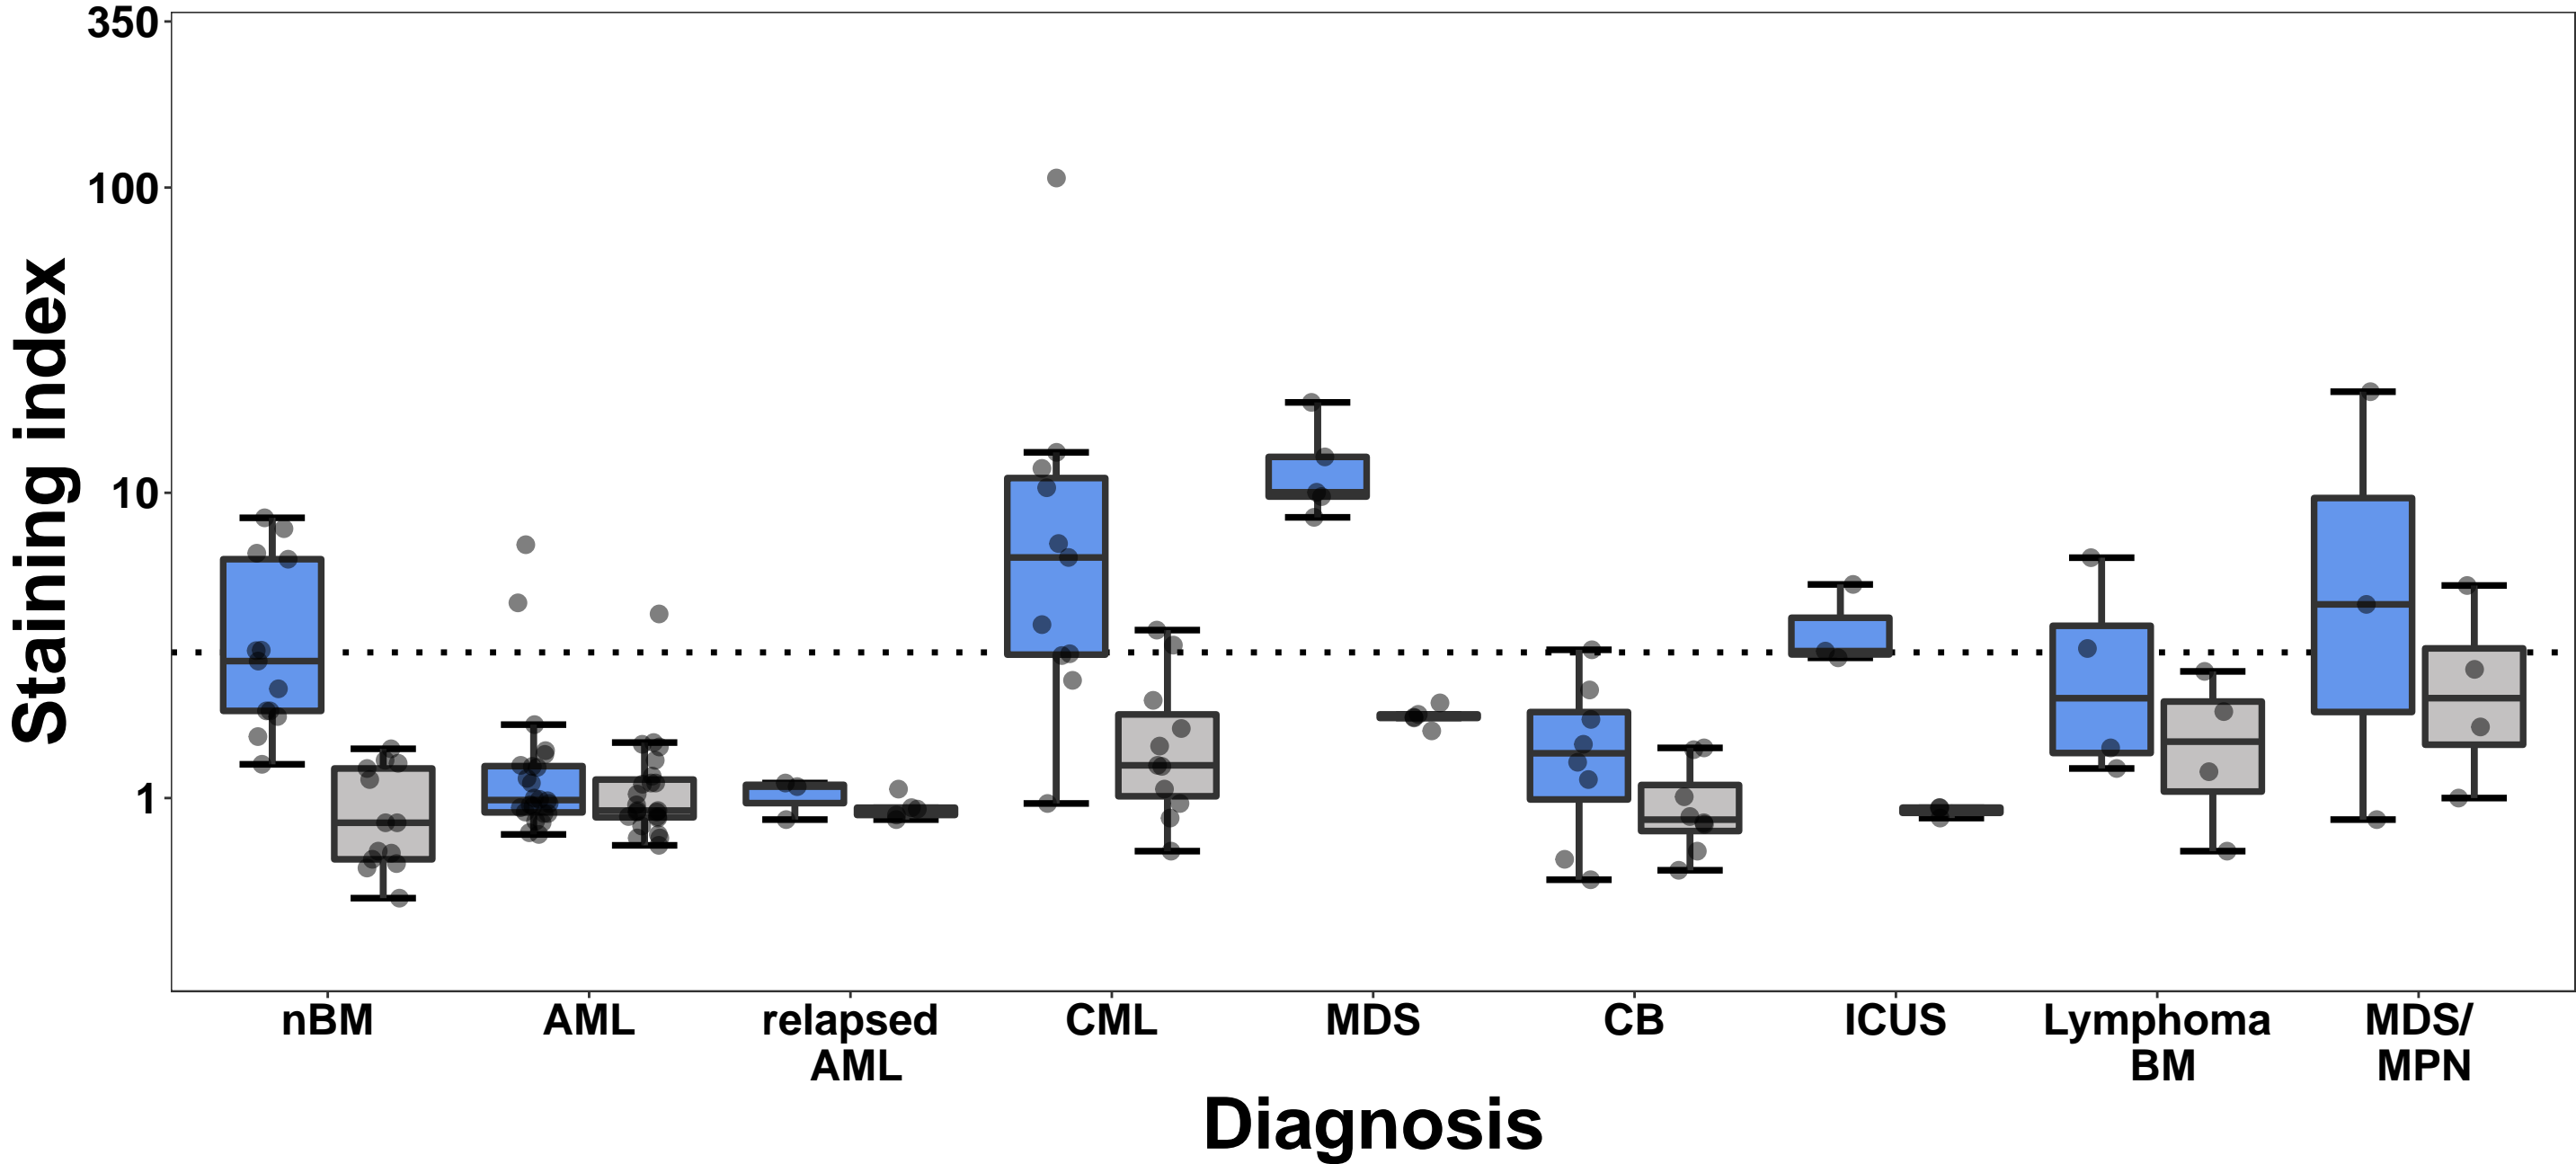

Cell fraction  CD34+/CD38-  CD34+/CD38+

# CD90 percentage

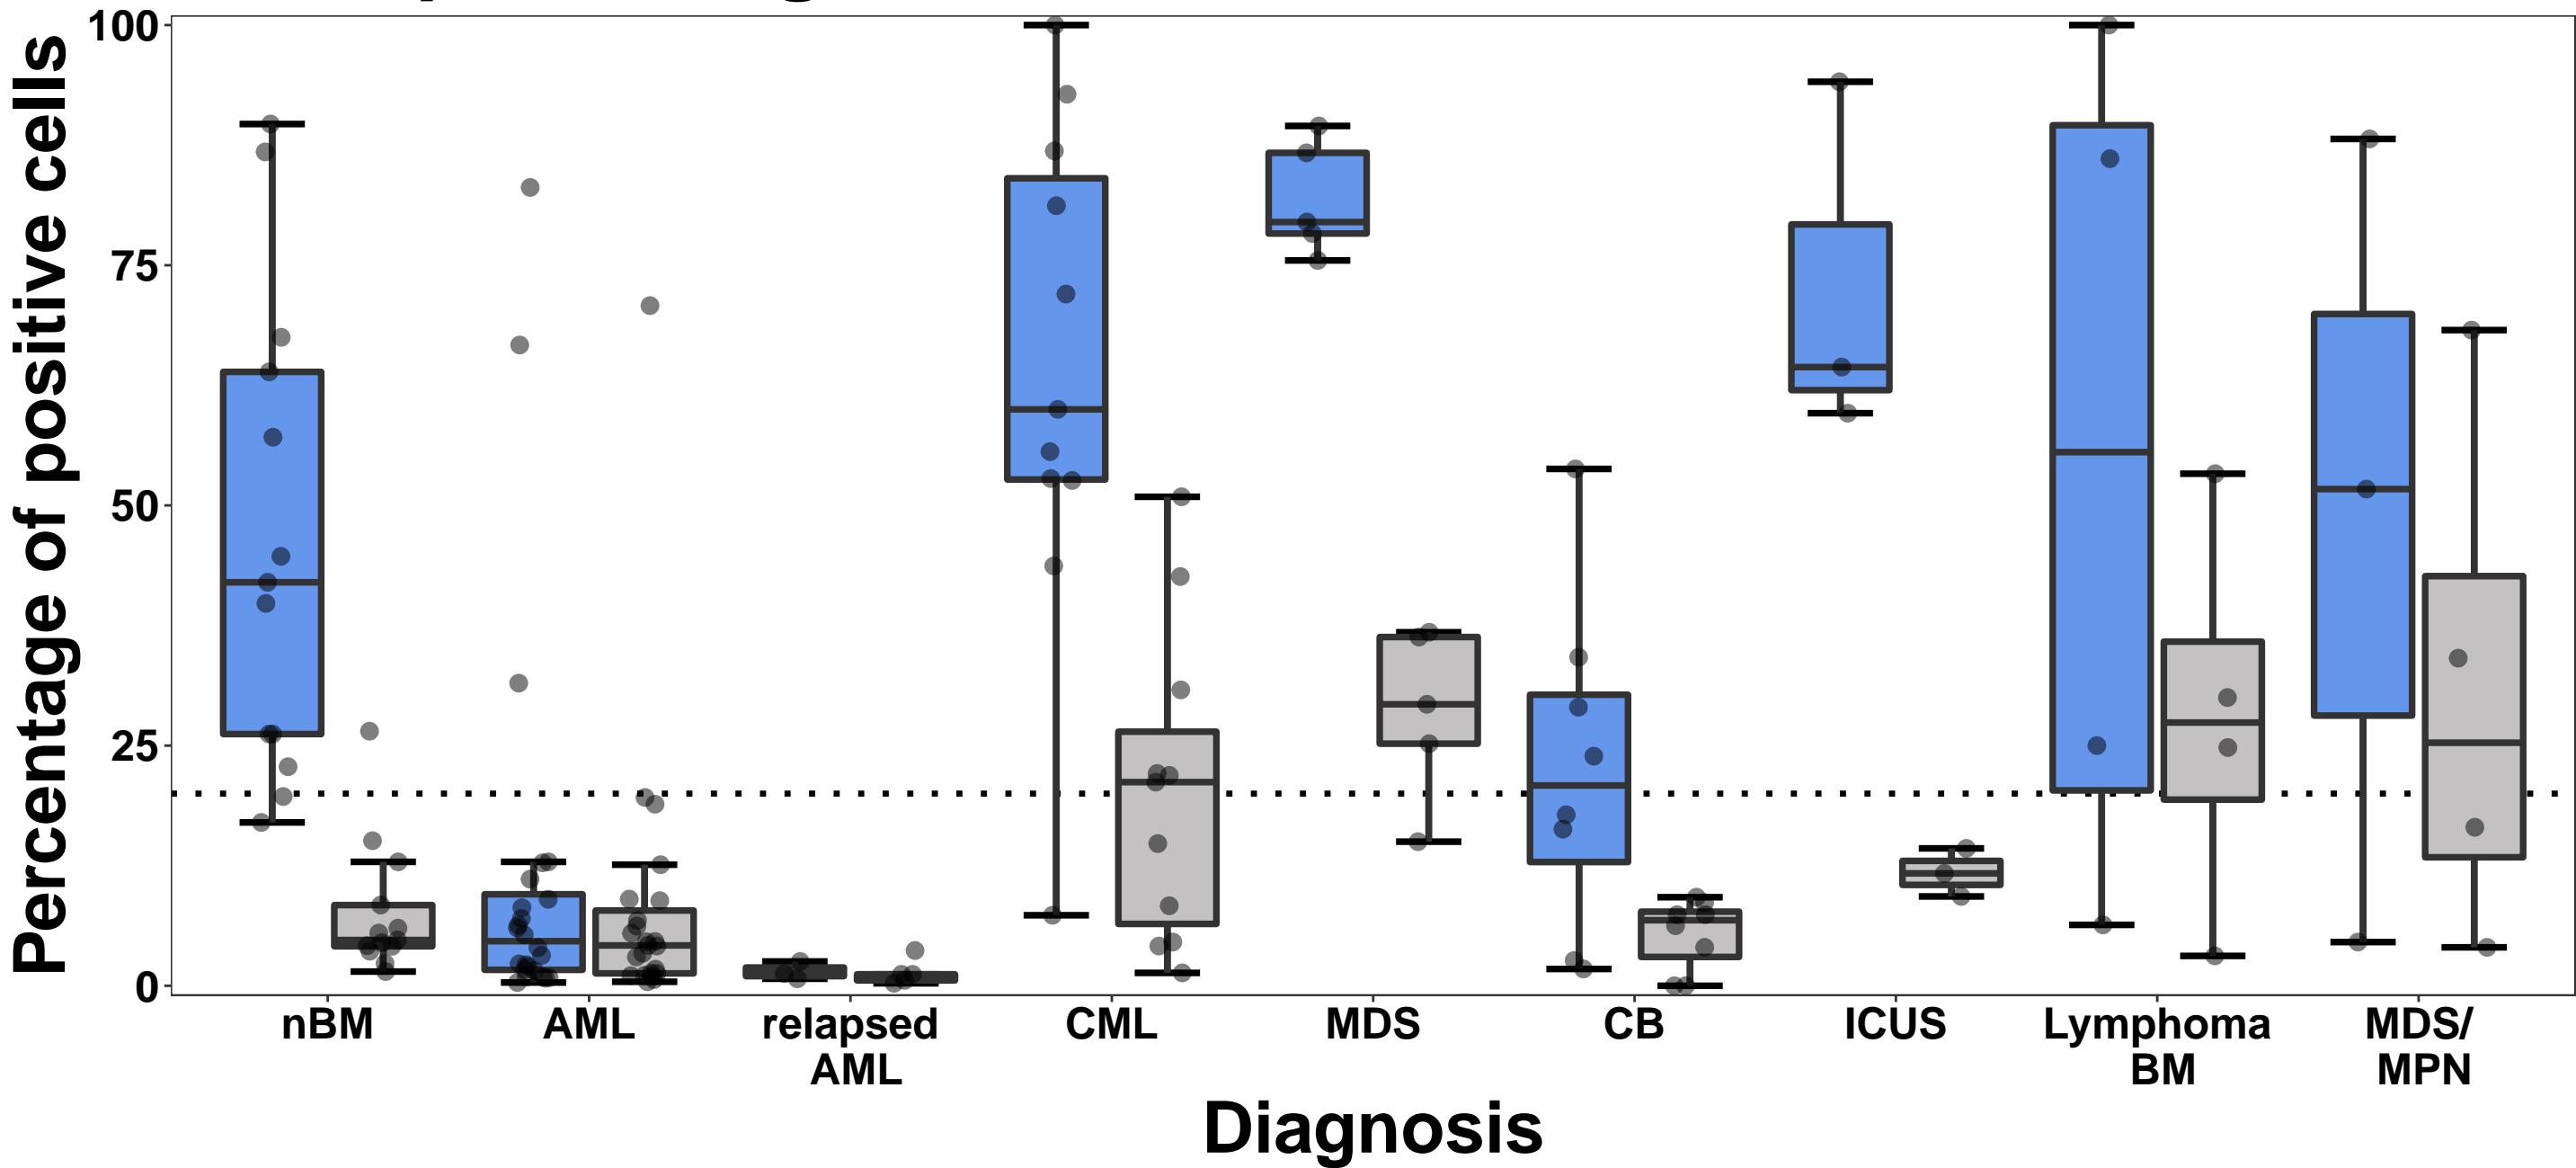

Cell fraction  CD34+/CD38-  CD34+/CD38+

# CD93 staining index

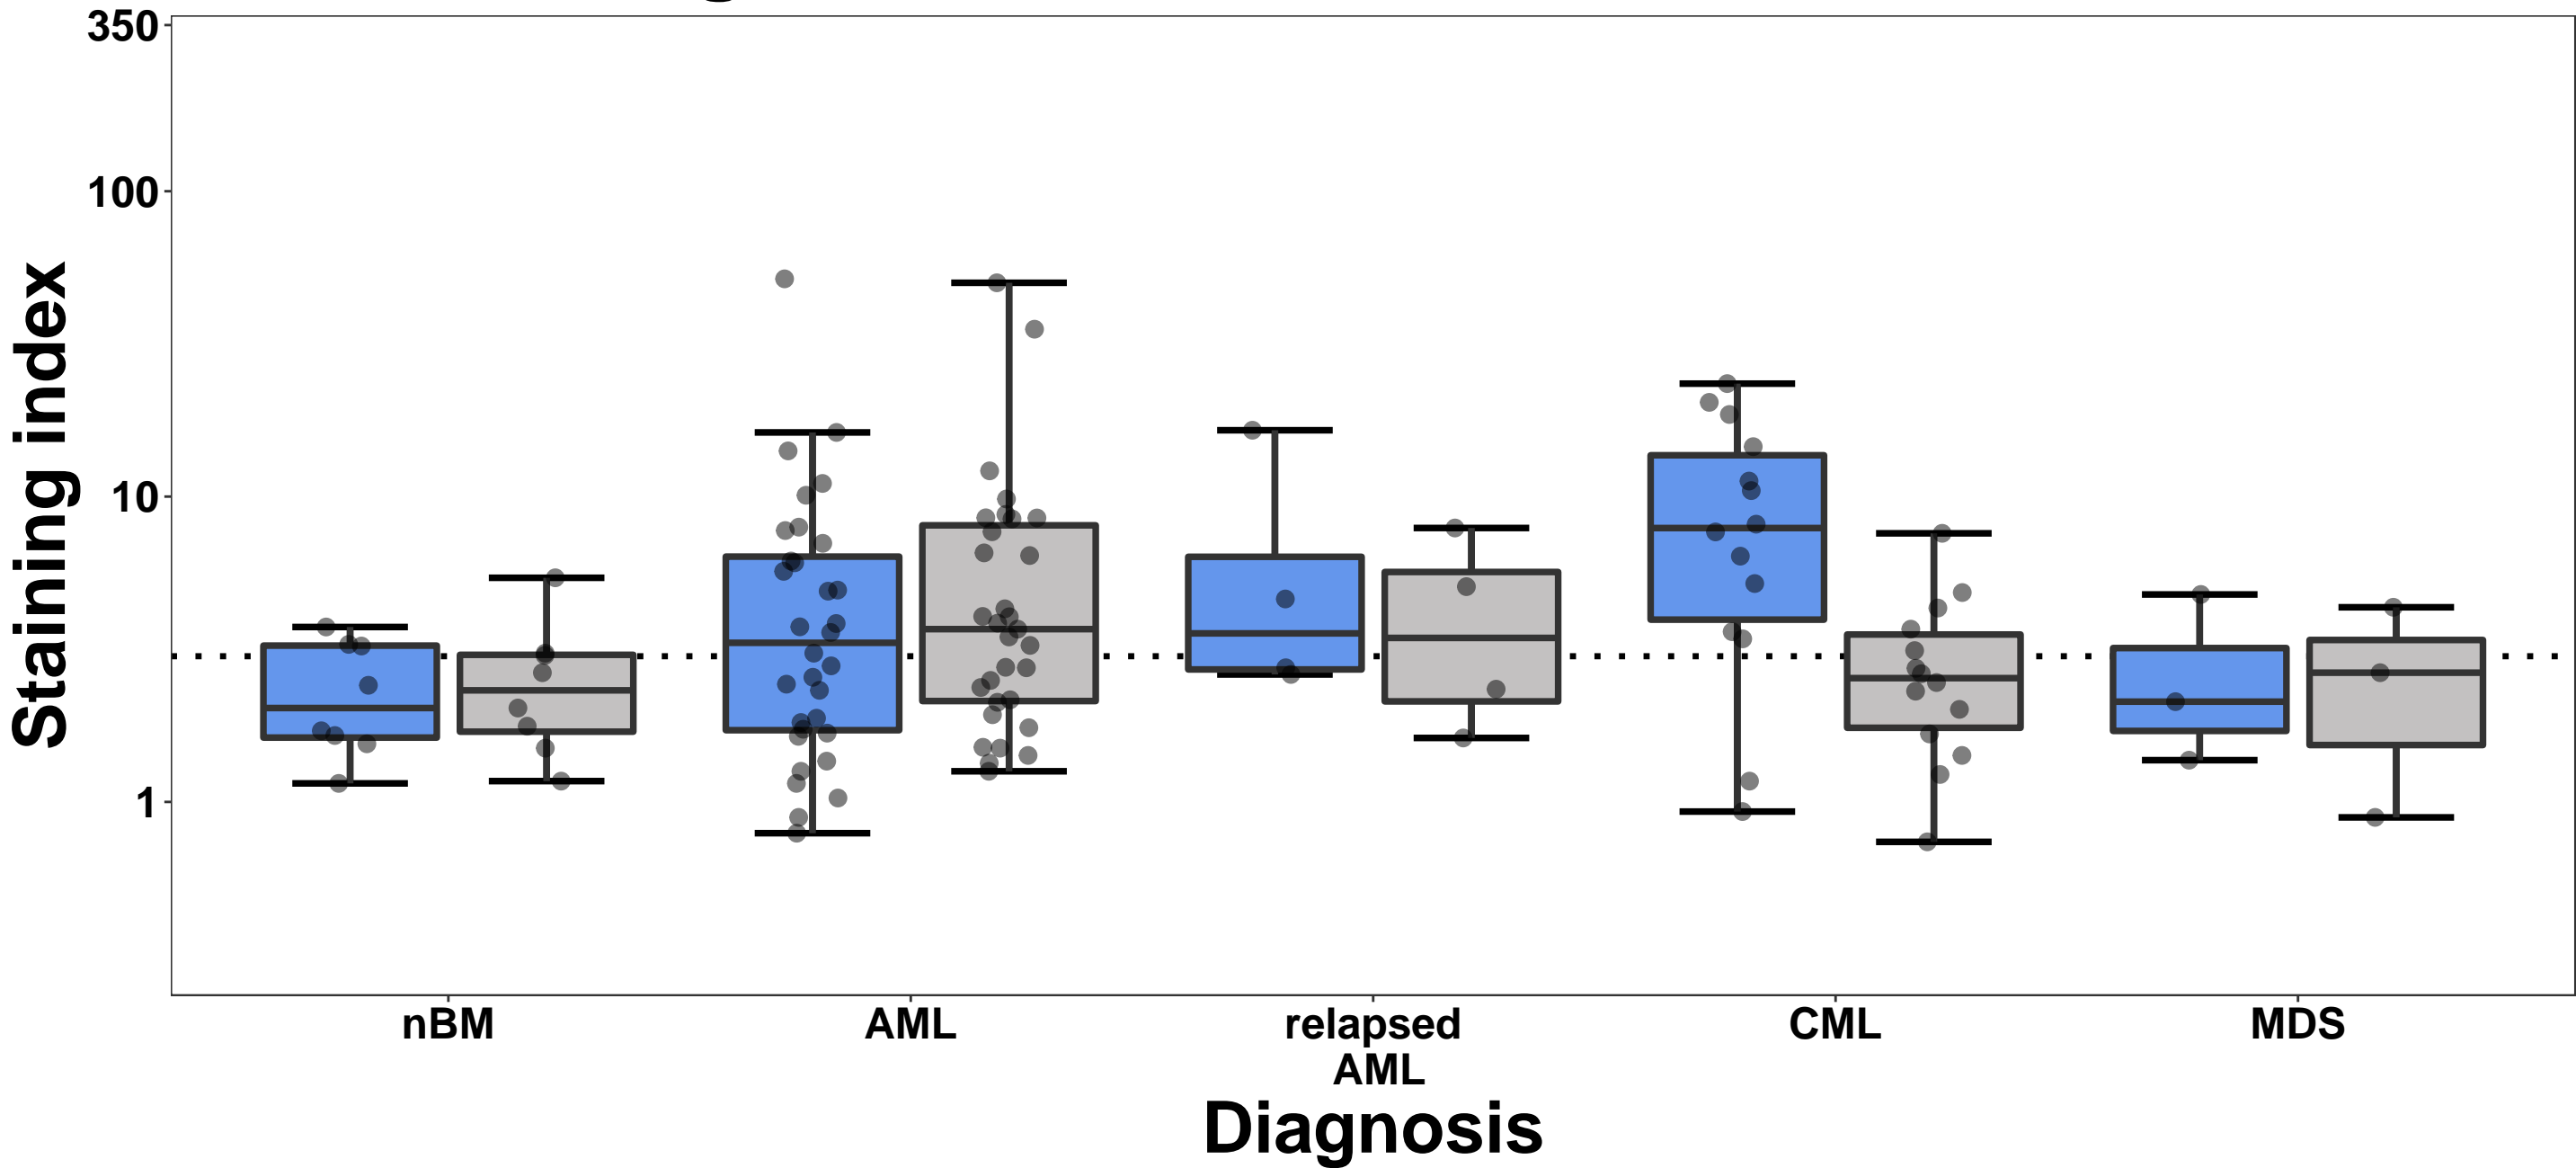



Cell fraction  CD34+/CD38-  CD34+/CD38+

# CD93 percentage

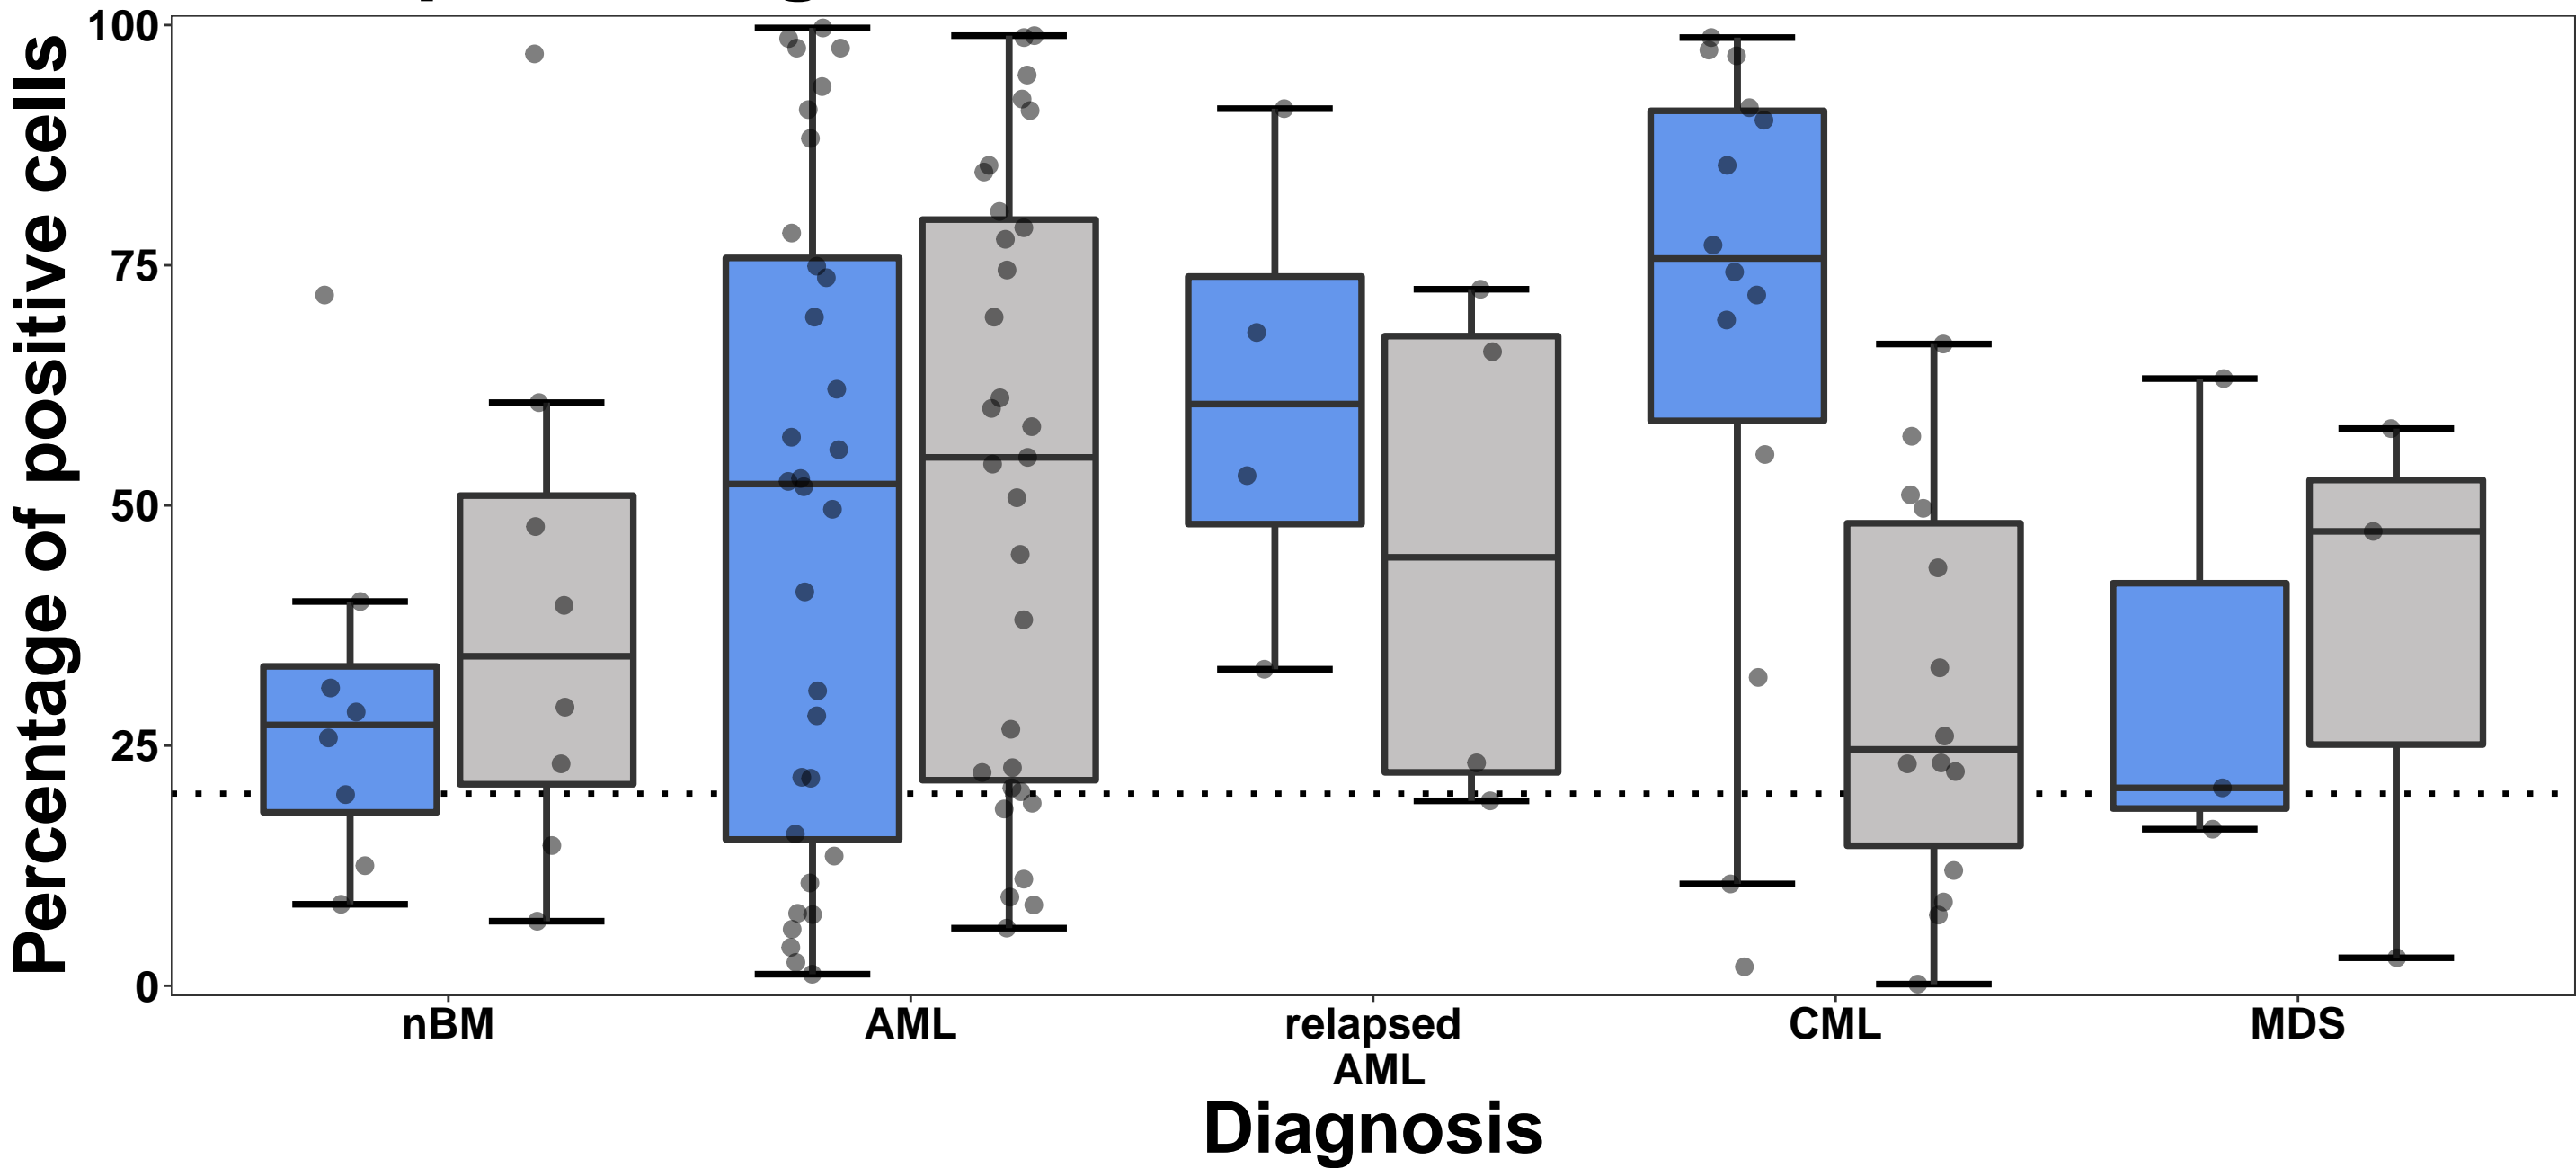

# CD95 staining index

Cell fraction  CD34+/CD38-  CD34+/CD38+

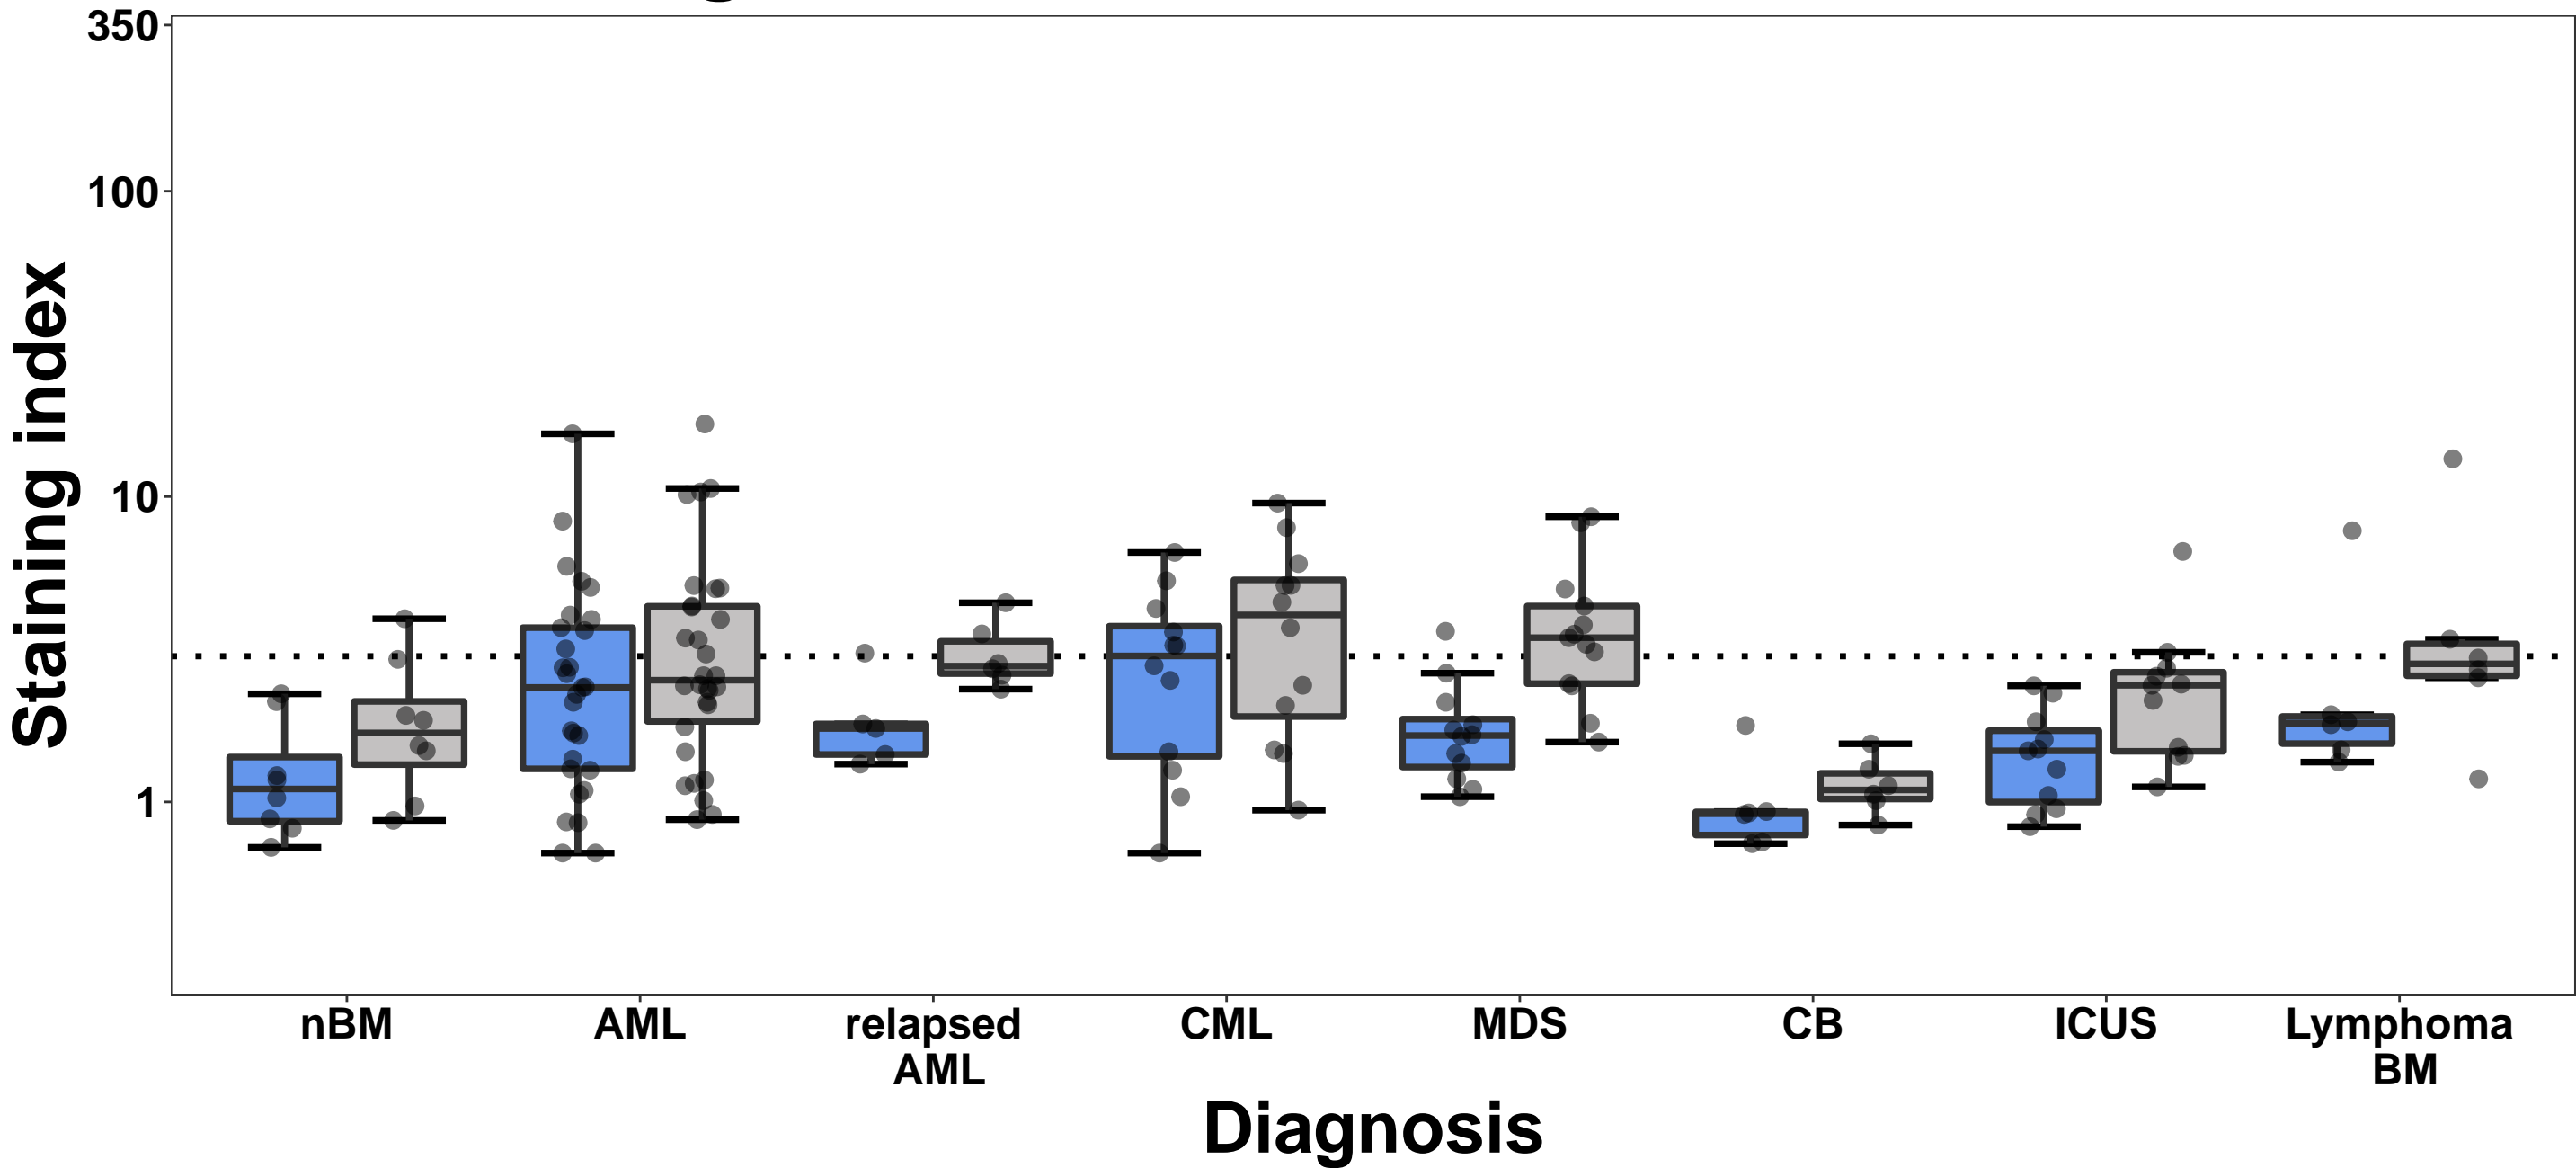

Cell fraction  CD34+/CD38-  CD34+/CD38+

# CD95 percentage

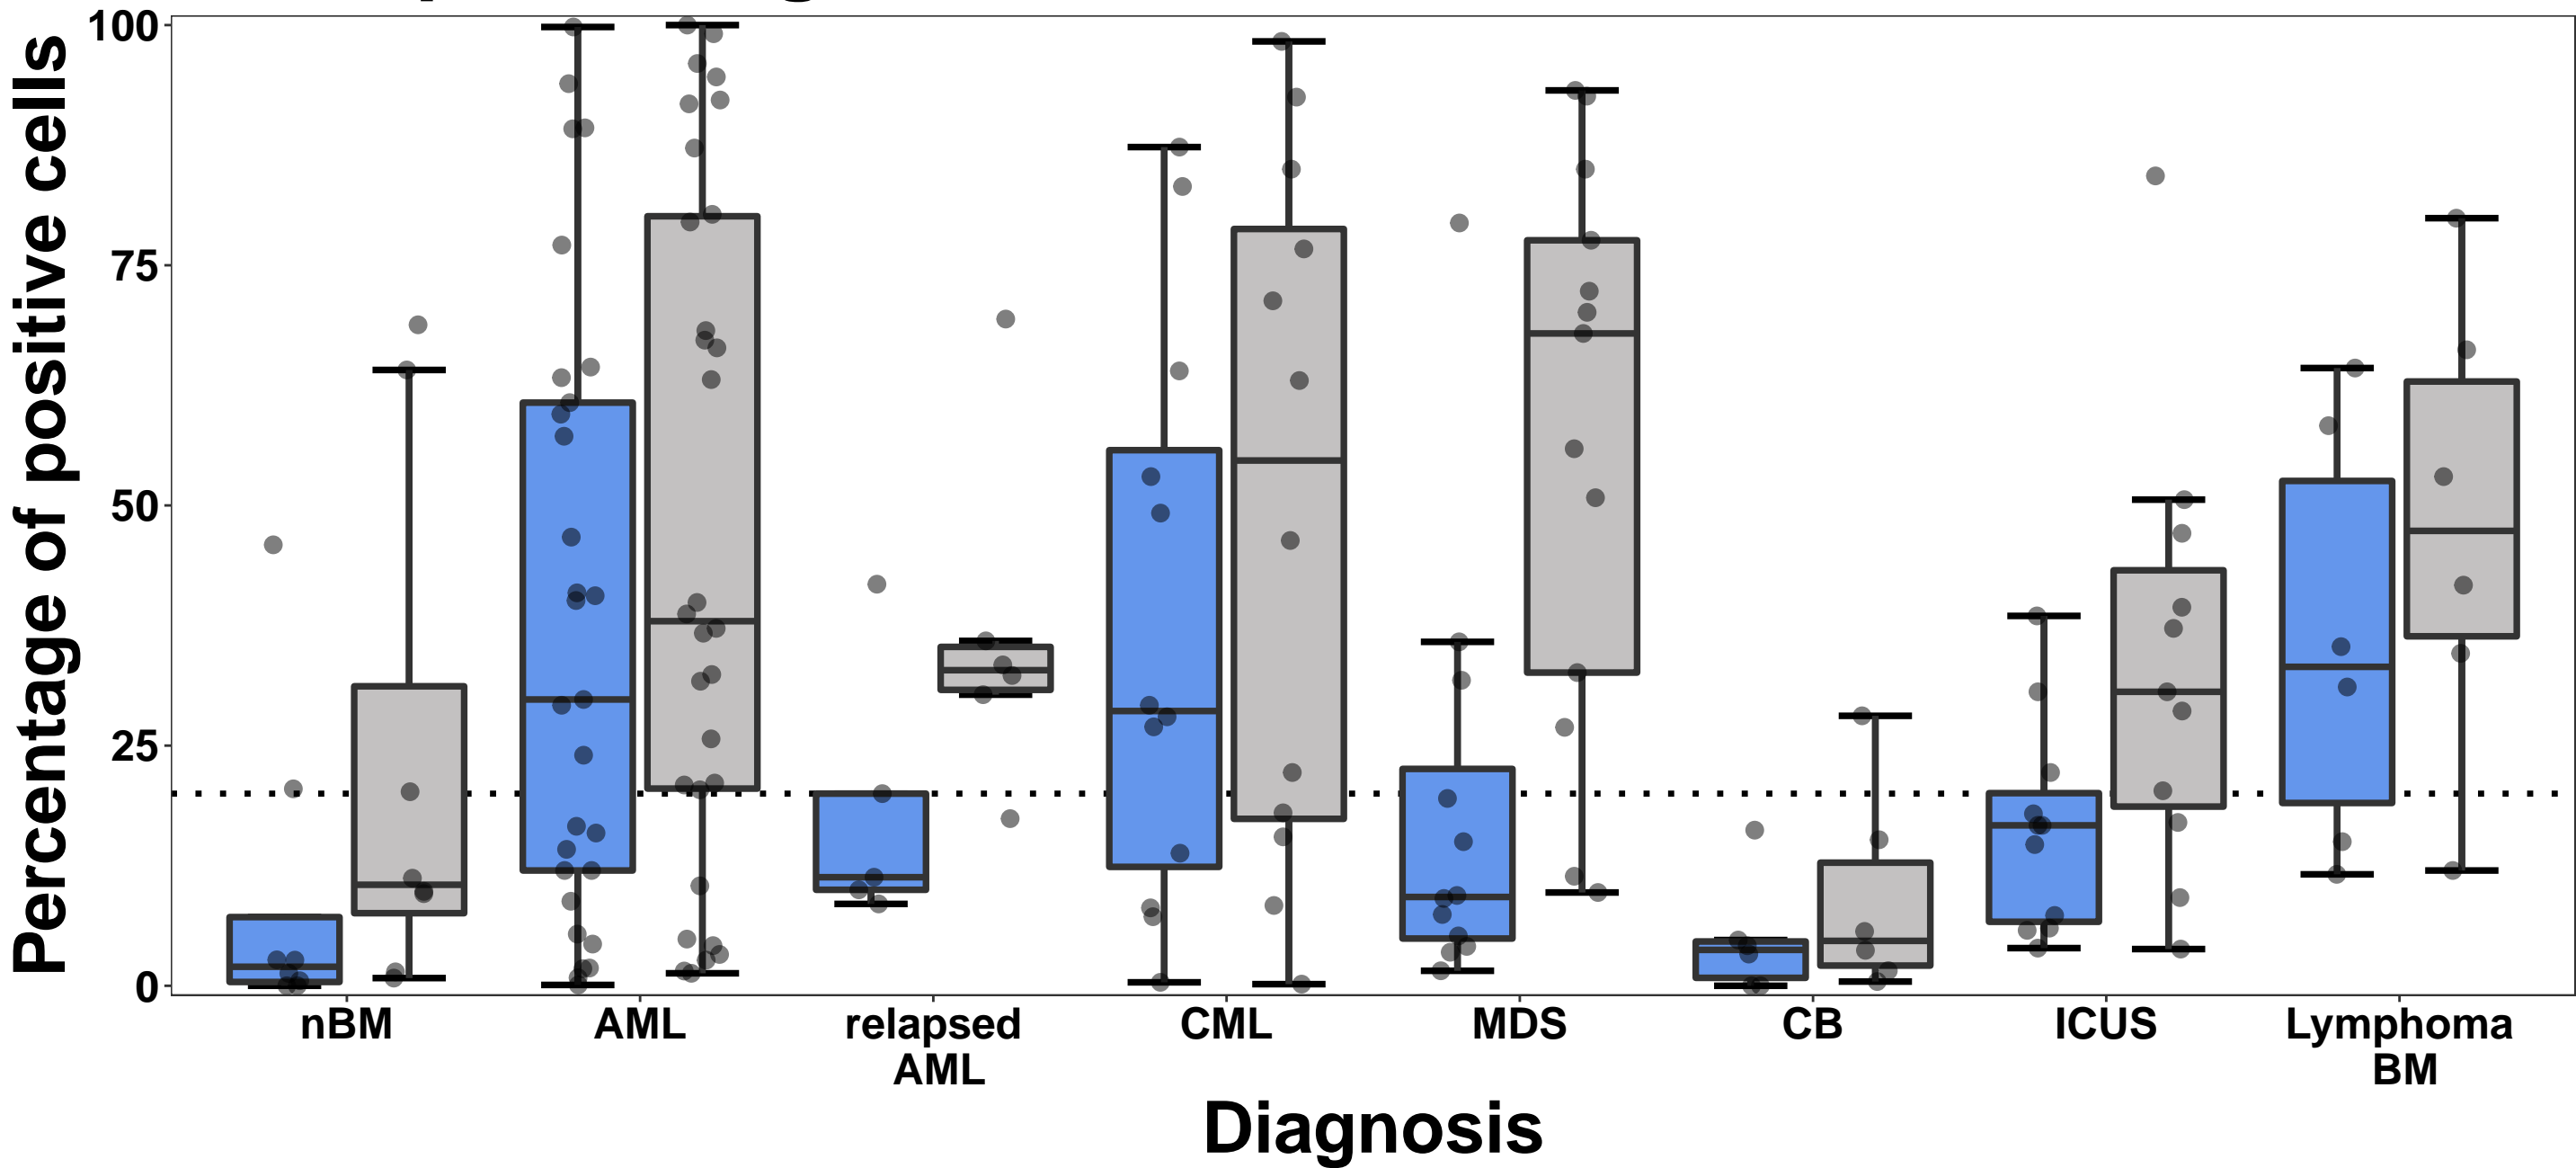

# CD96 staining index

Cell fraction  CD34+/CD38-  CD34+/CD38+

Staining index

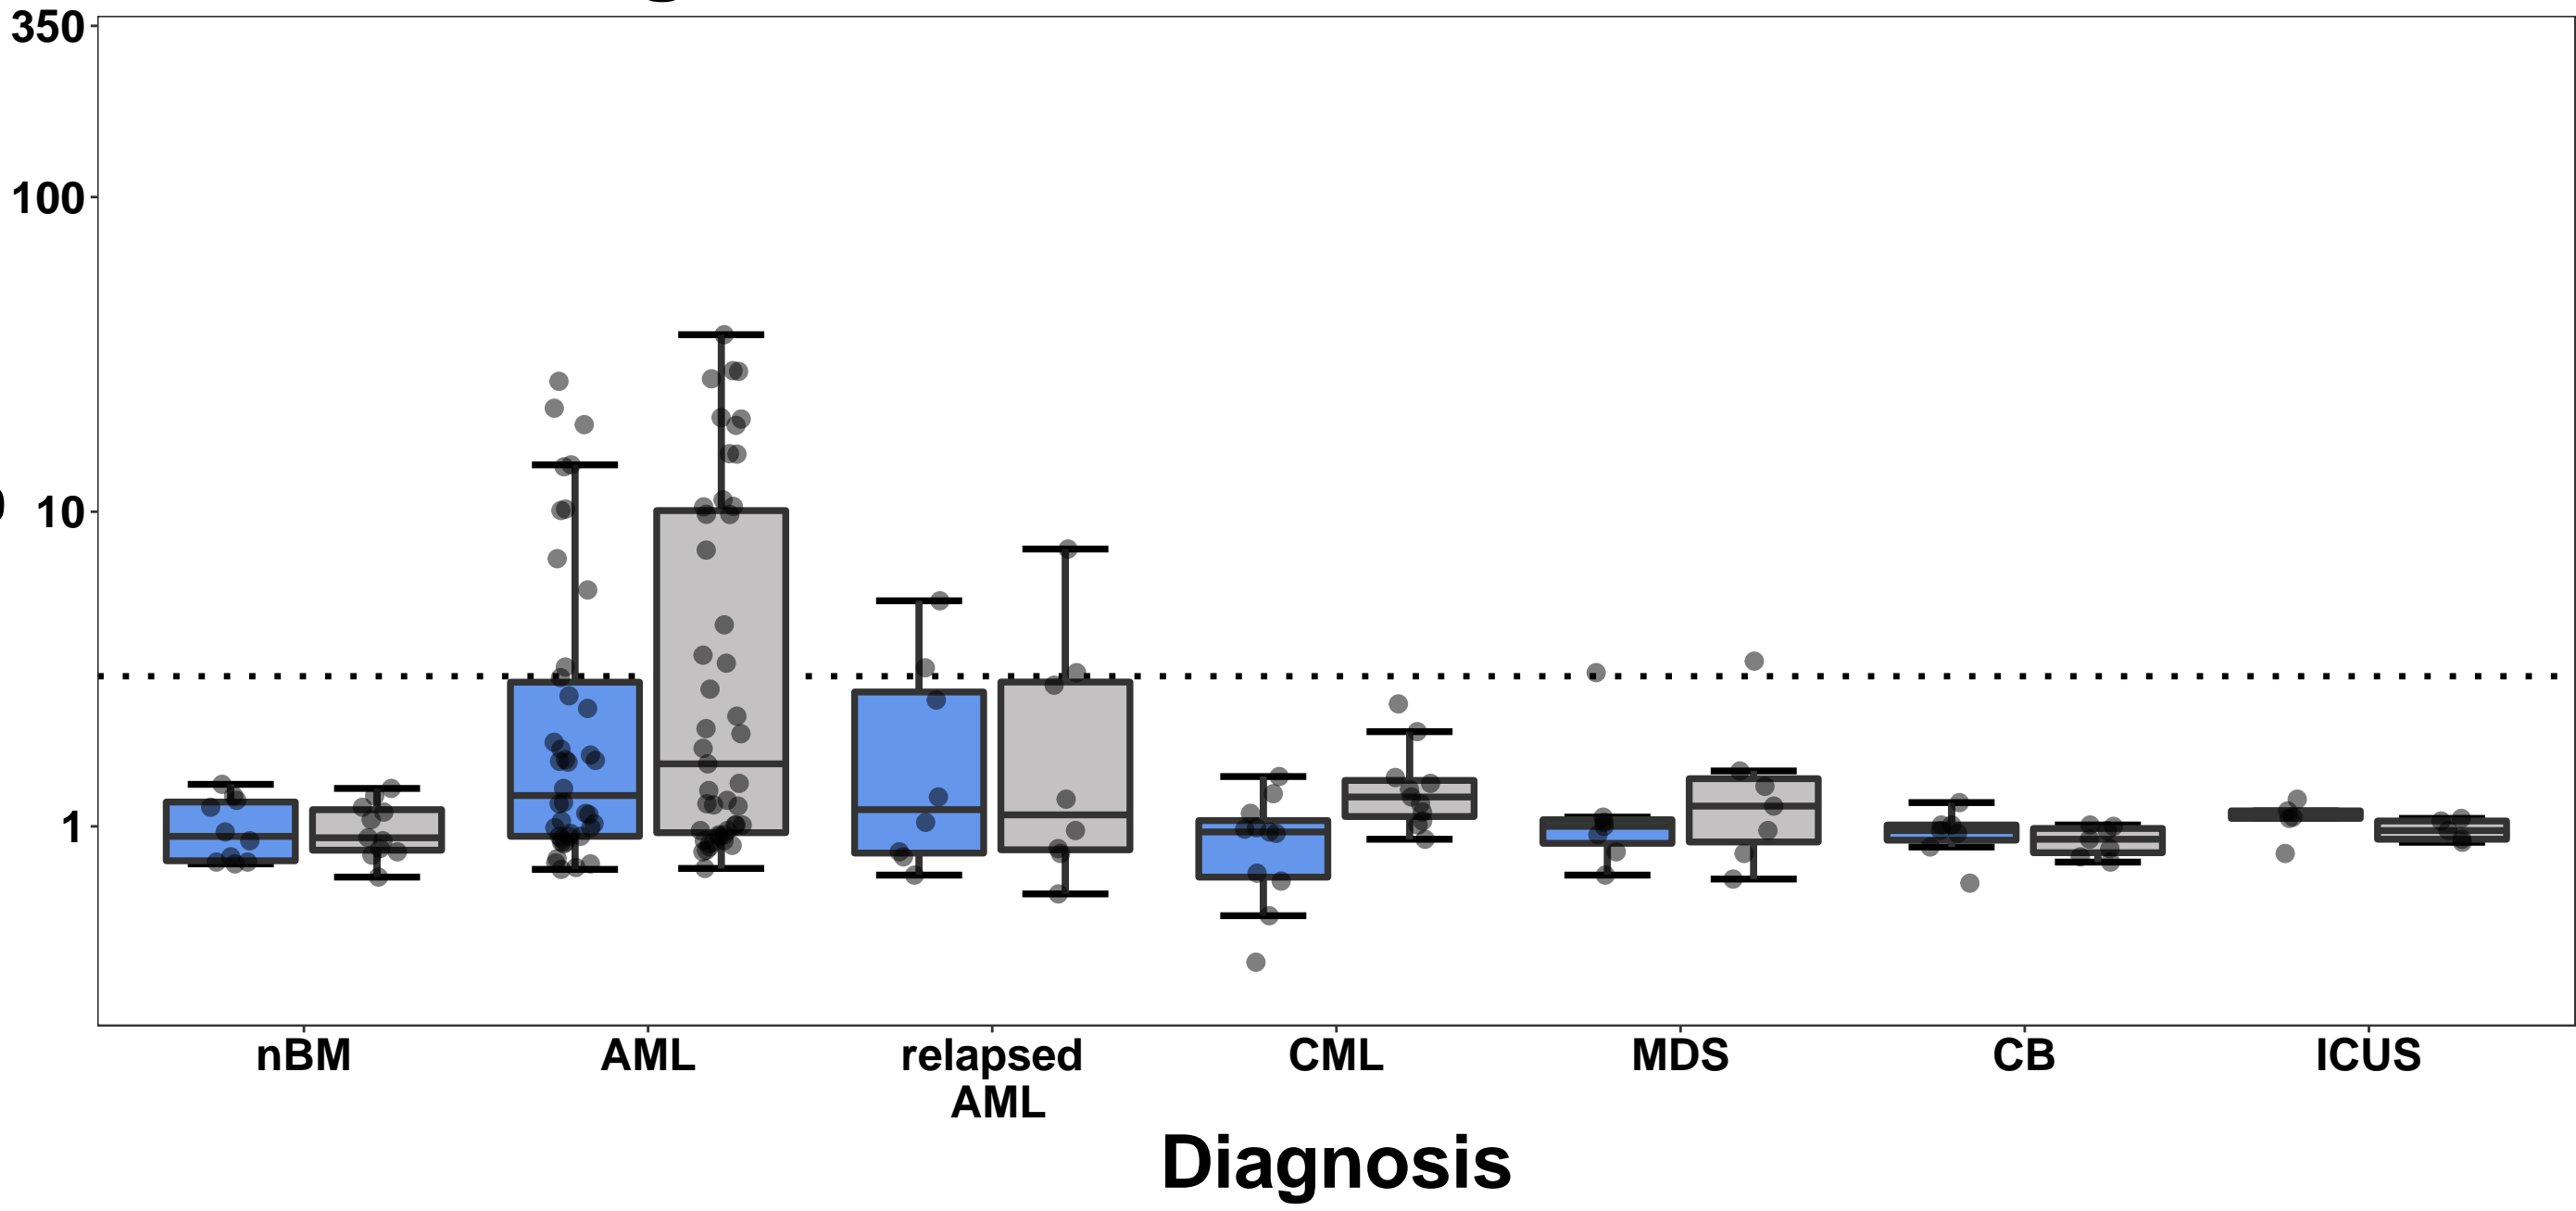

Cell fraction  CD34+/CD38-  CD34+/CD38+

# CD96 percentage

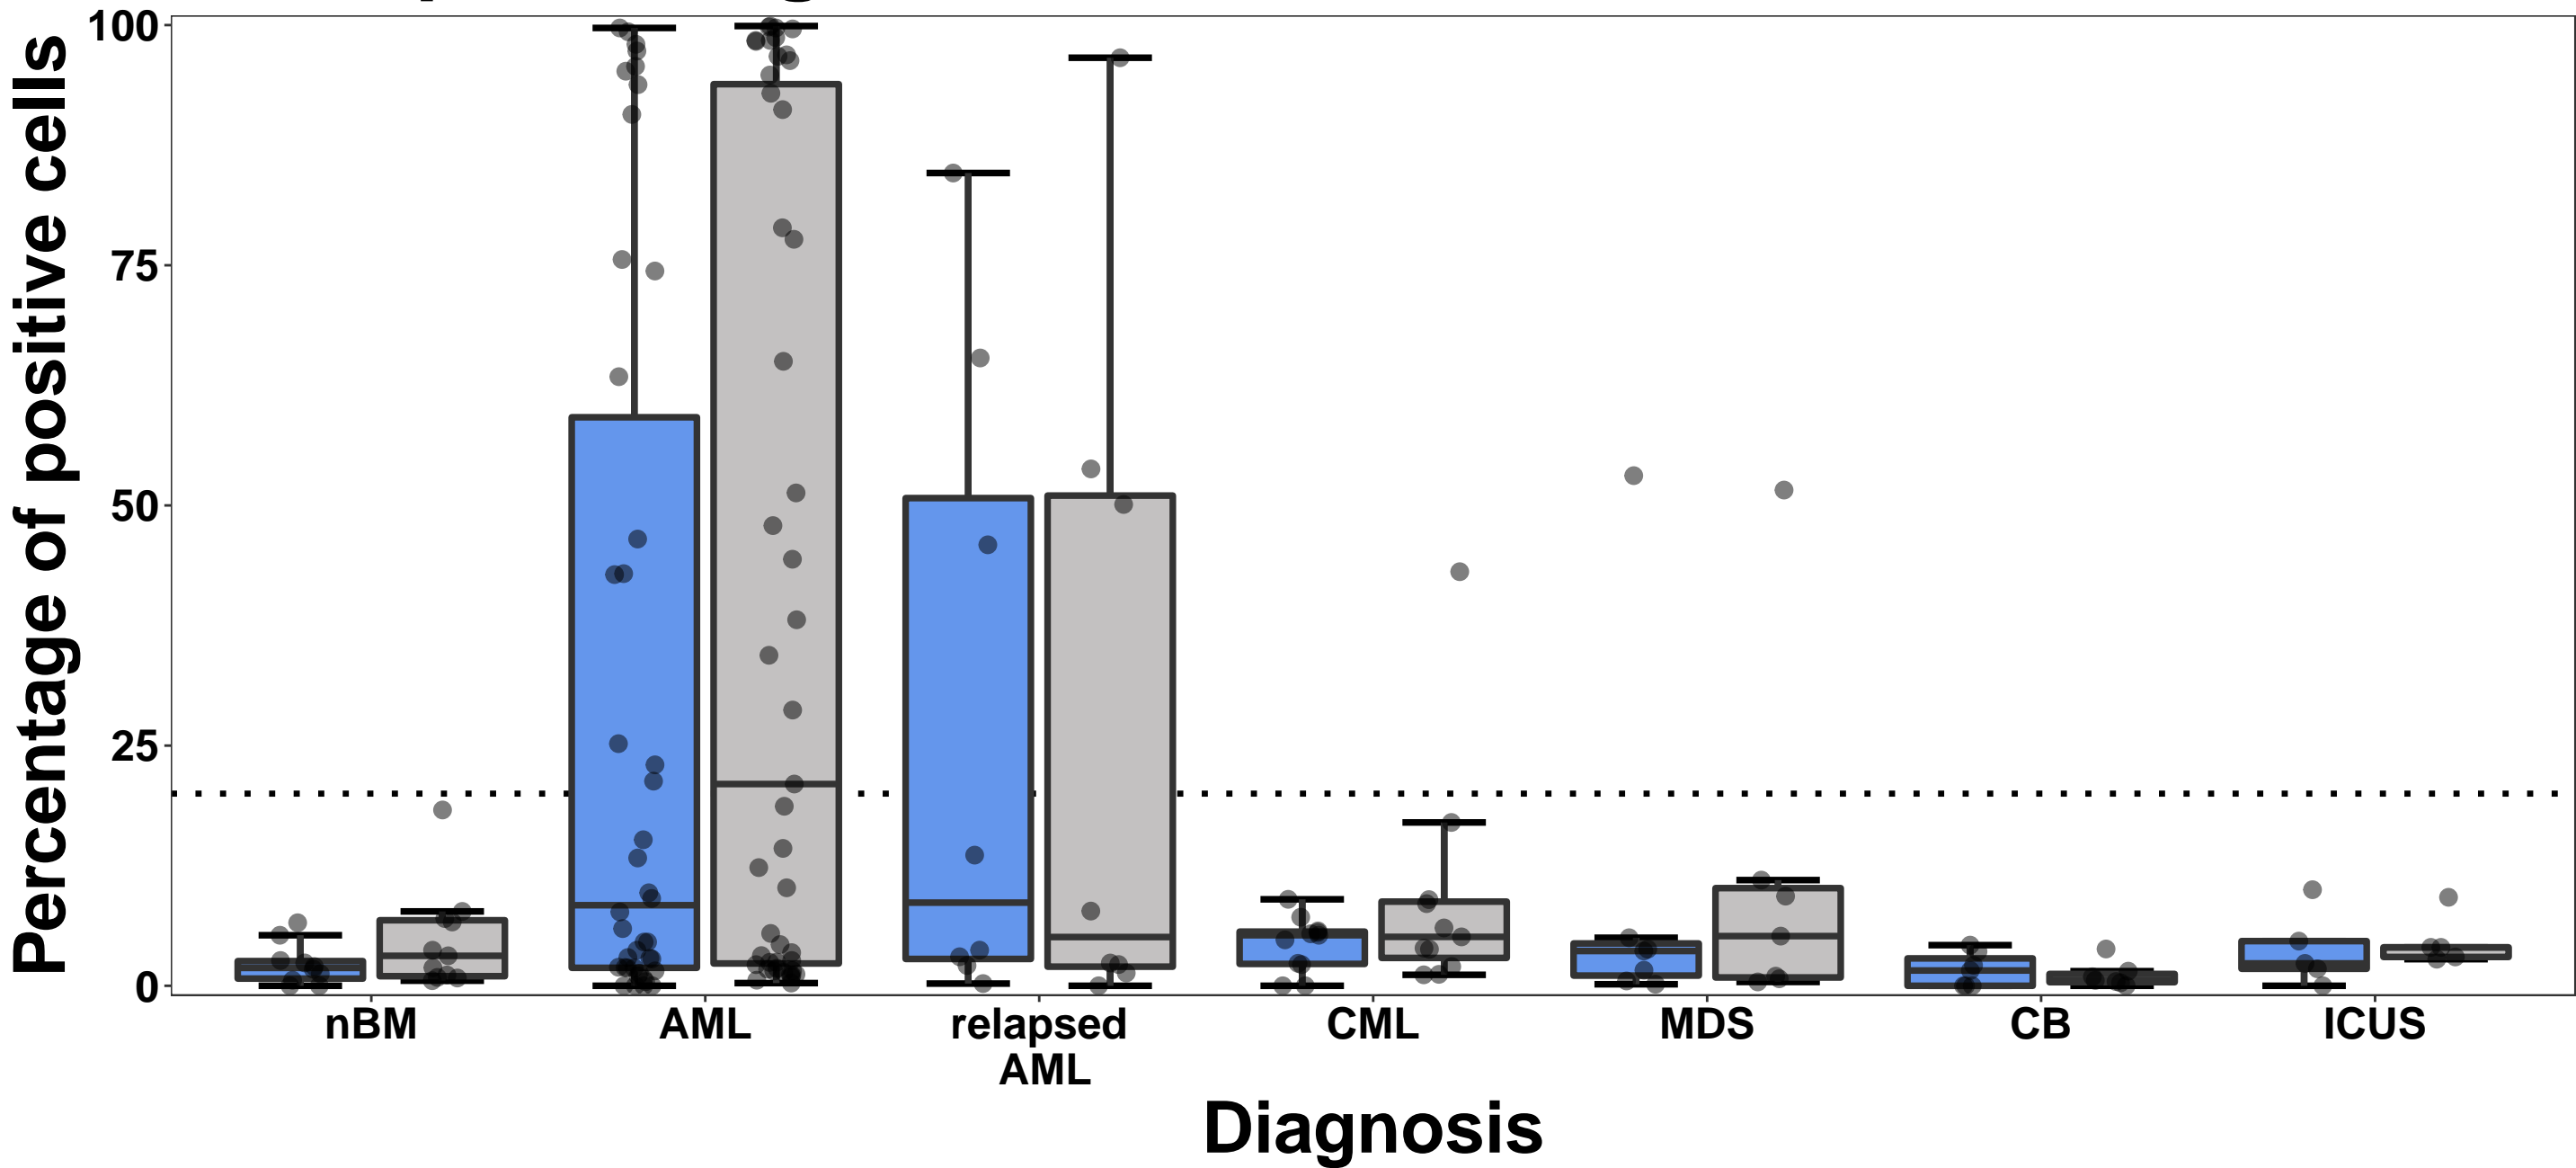

# CD97 staining index

Cell fraction  CD34+/CD38-  CD34+/CD38+

Staining index

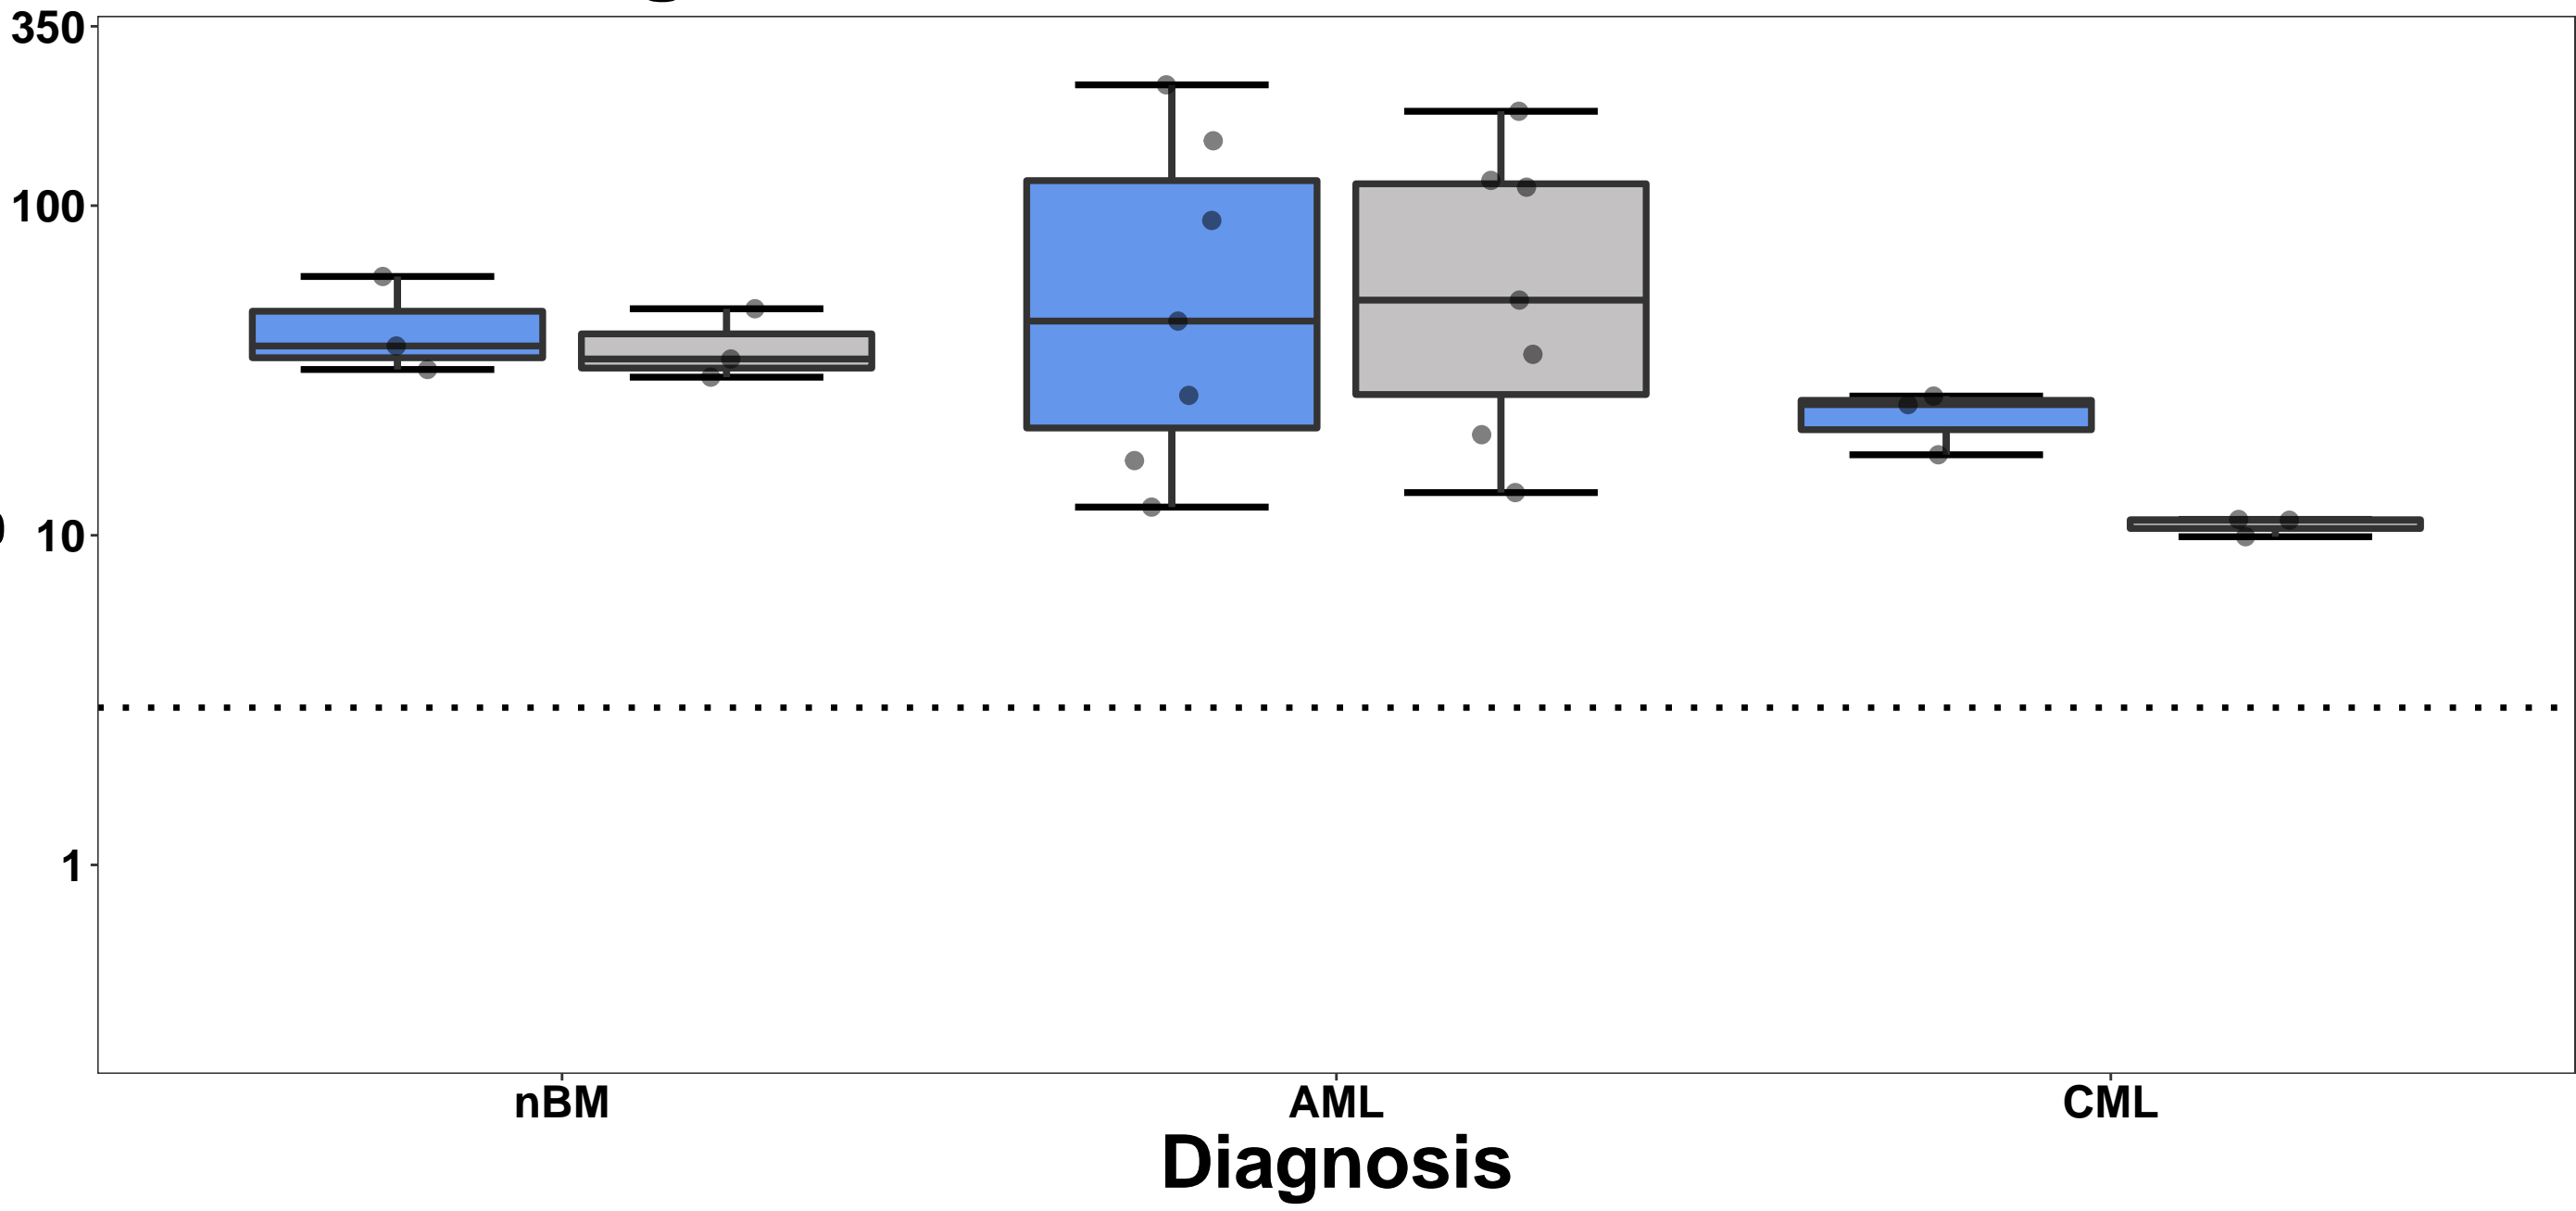

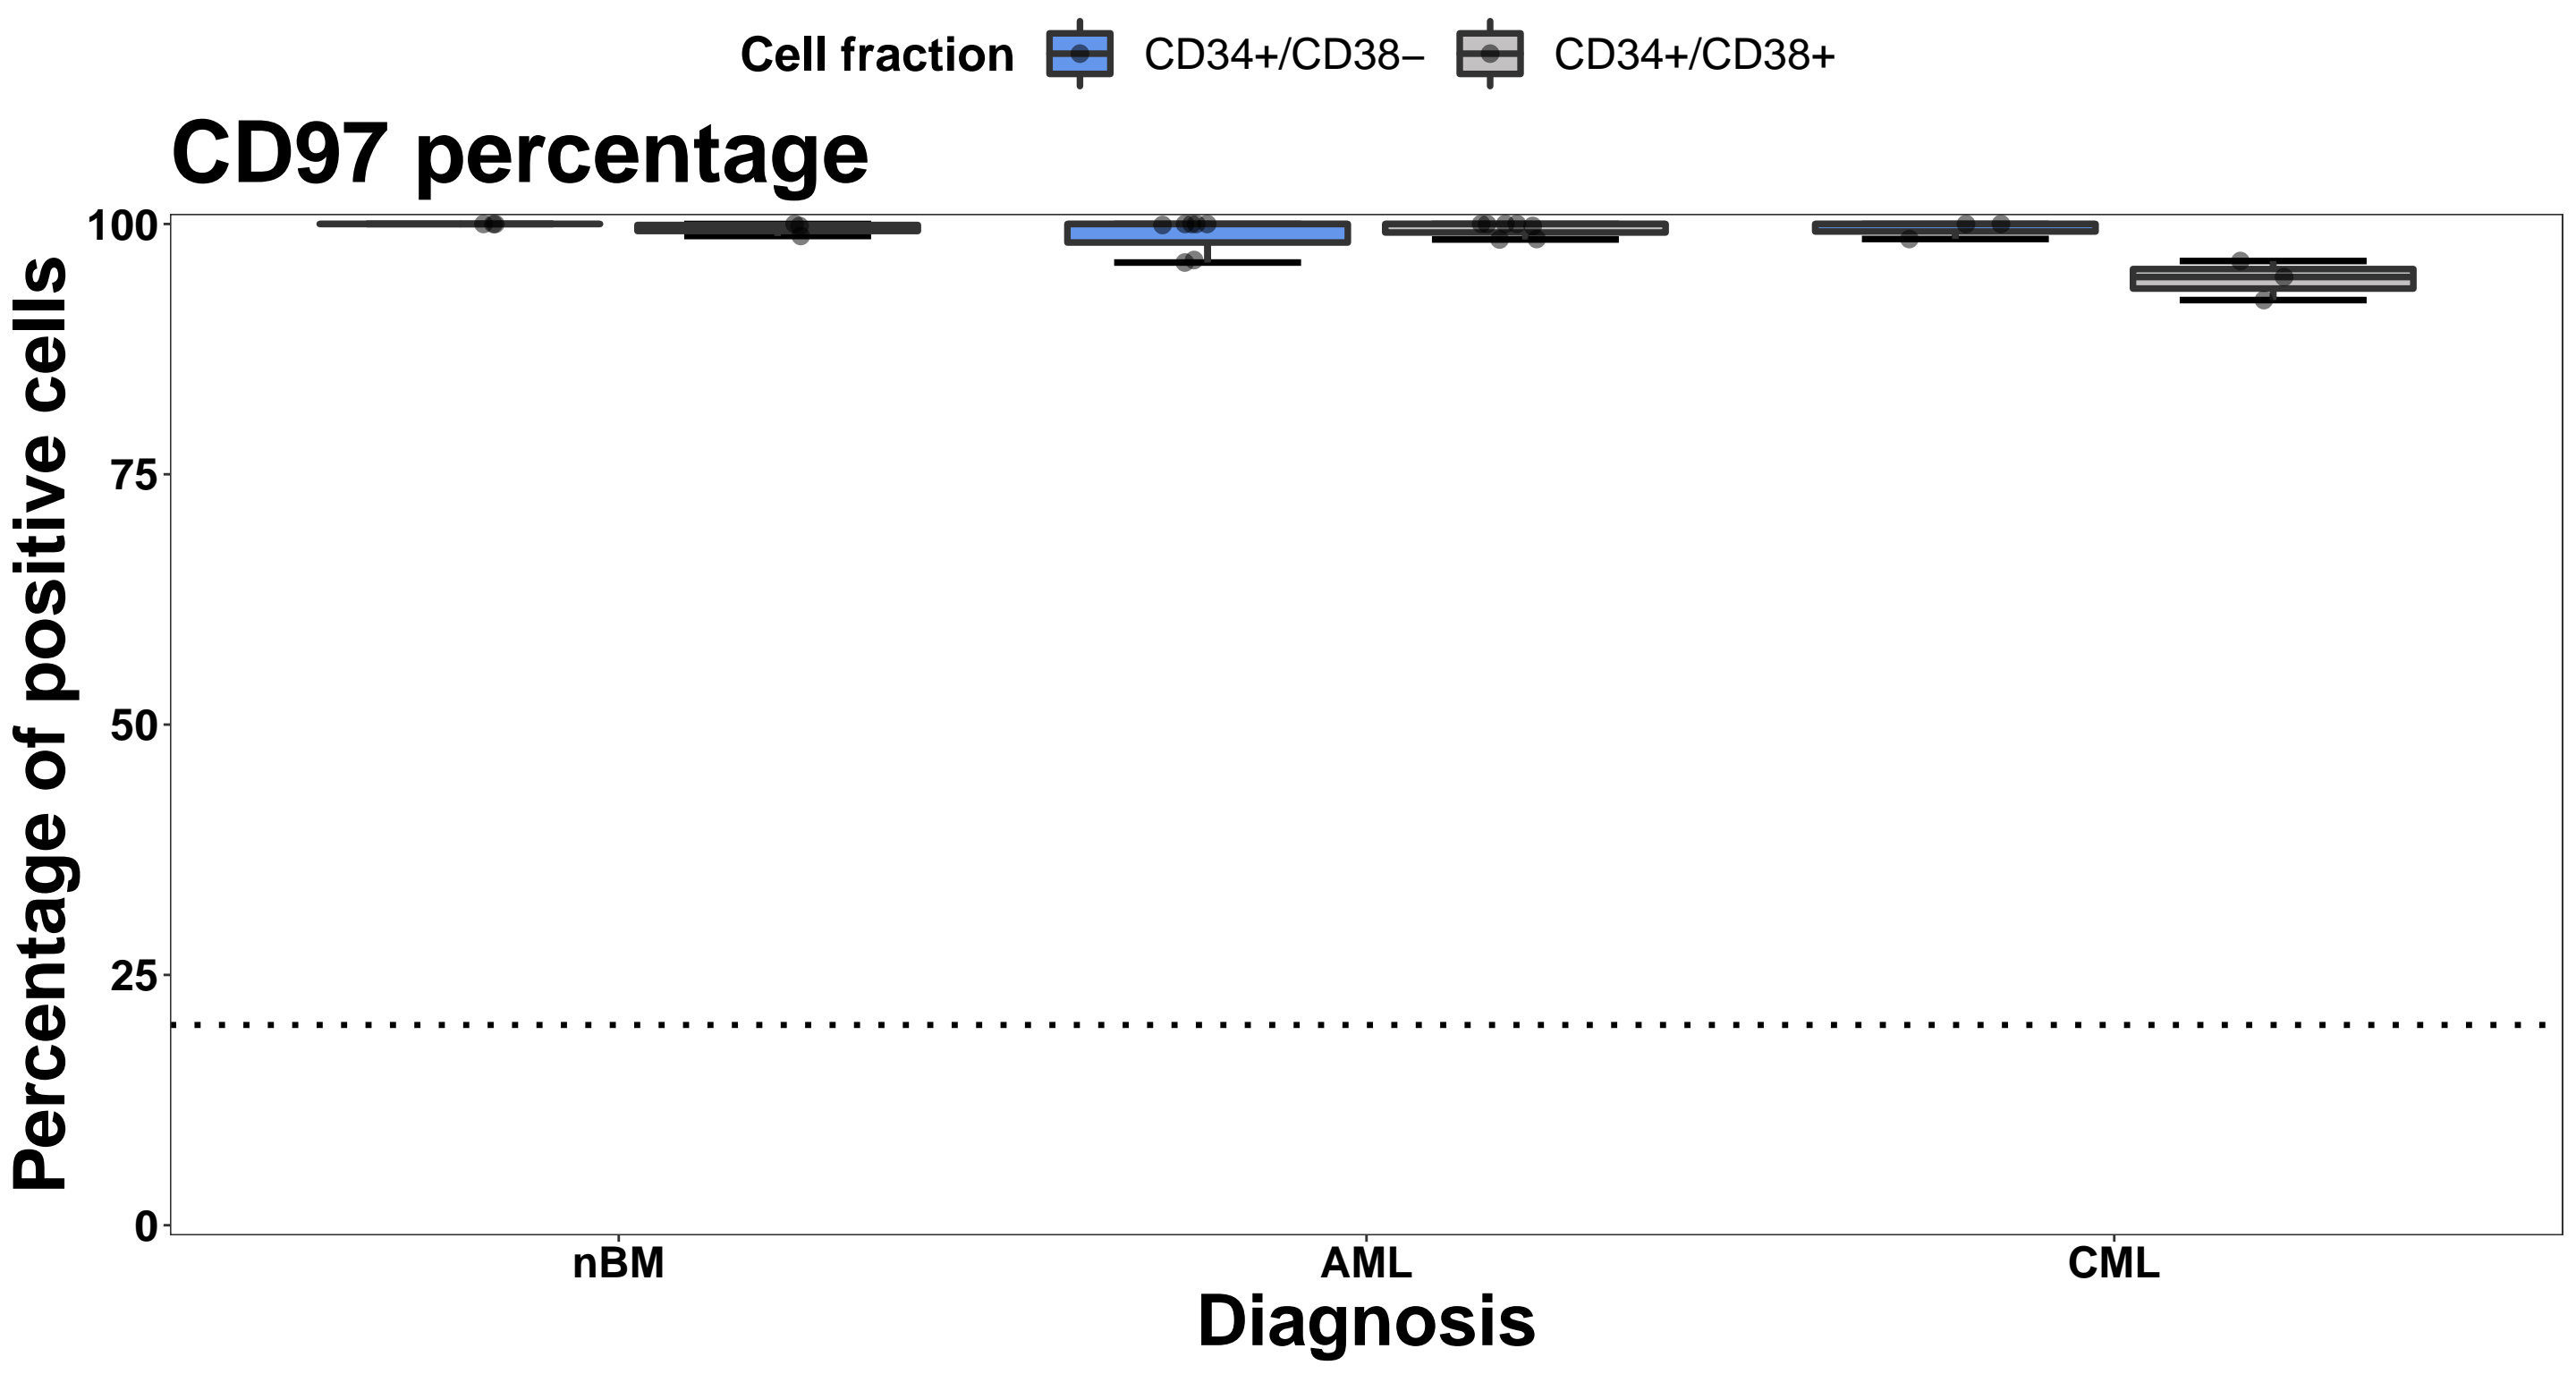

# CD99 staining index

Cell fraction  CD34+/CD38-  CD34+/CD38+

Staining index

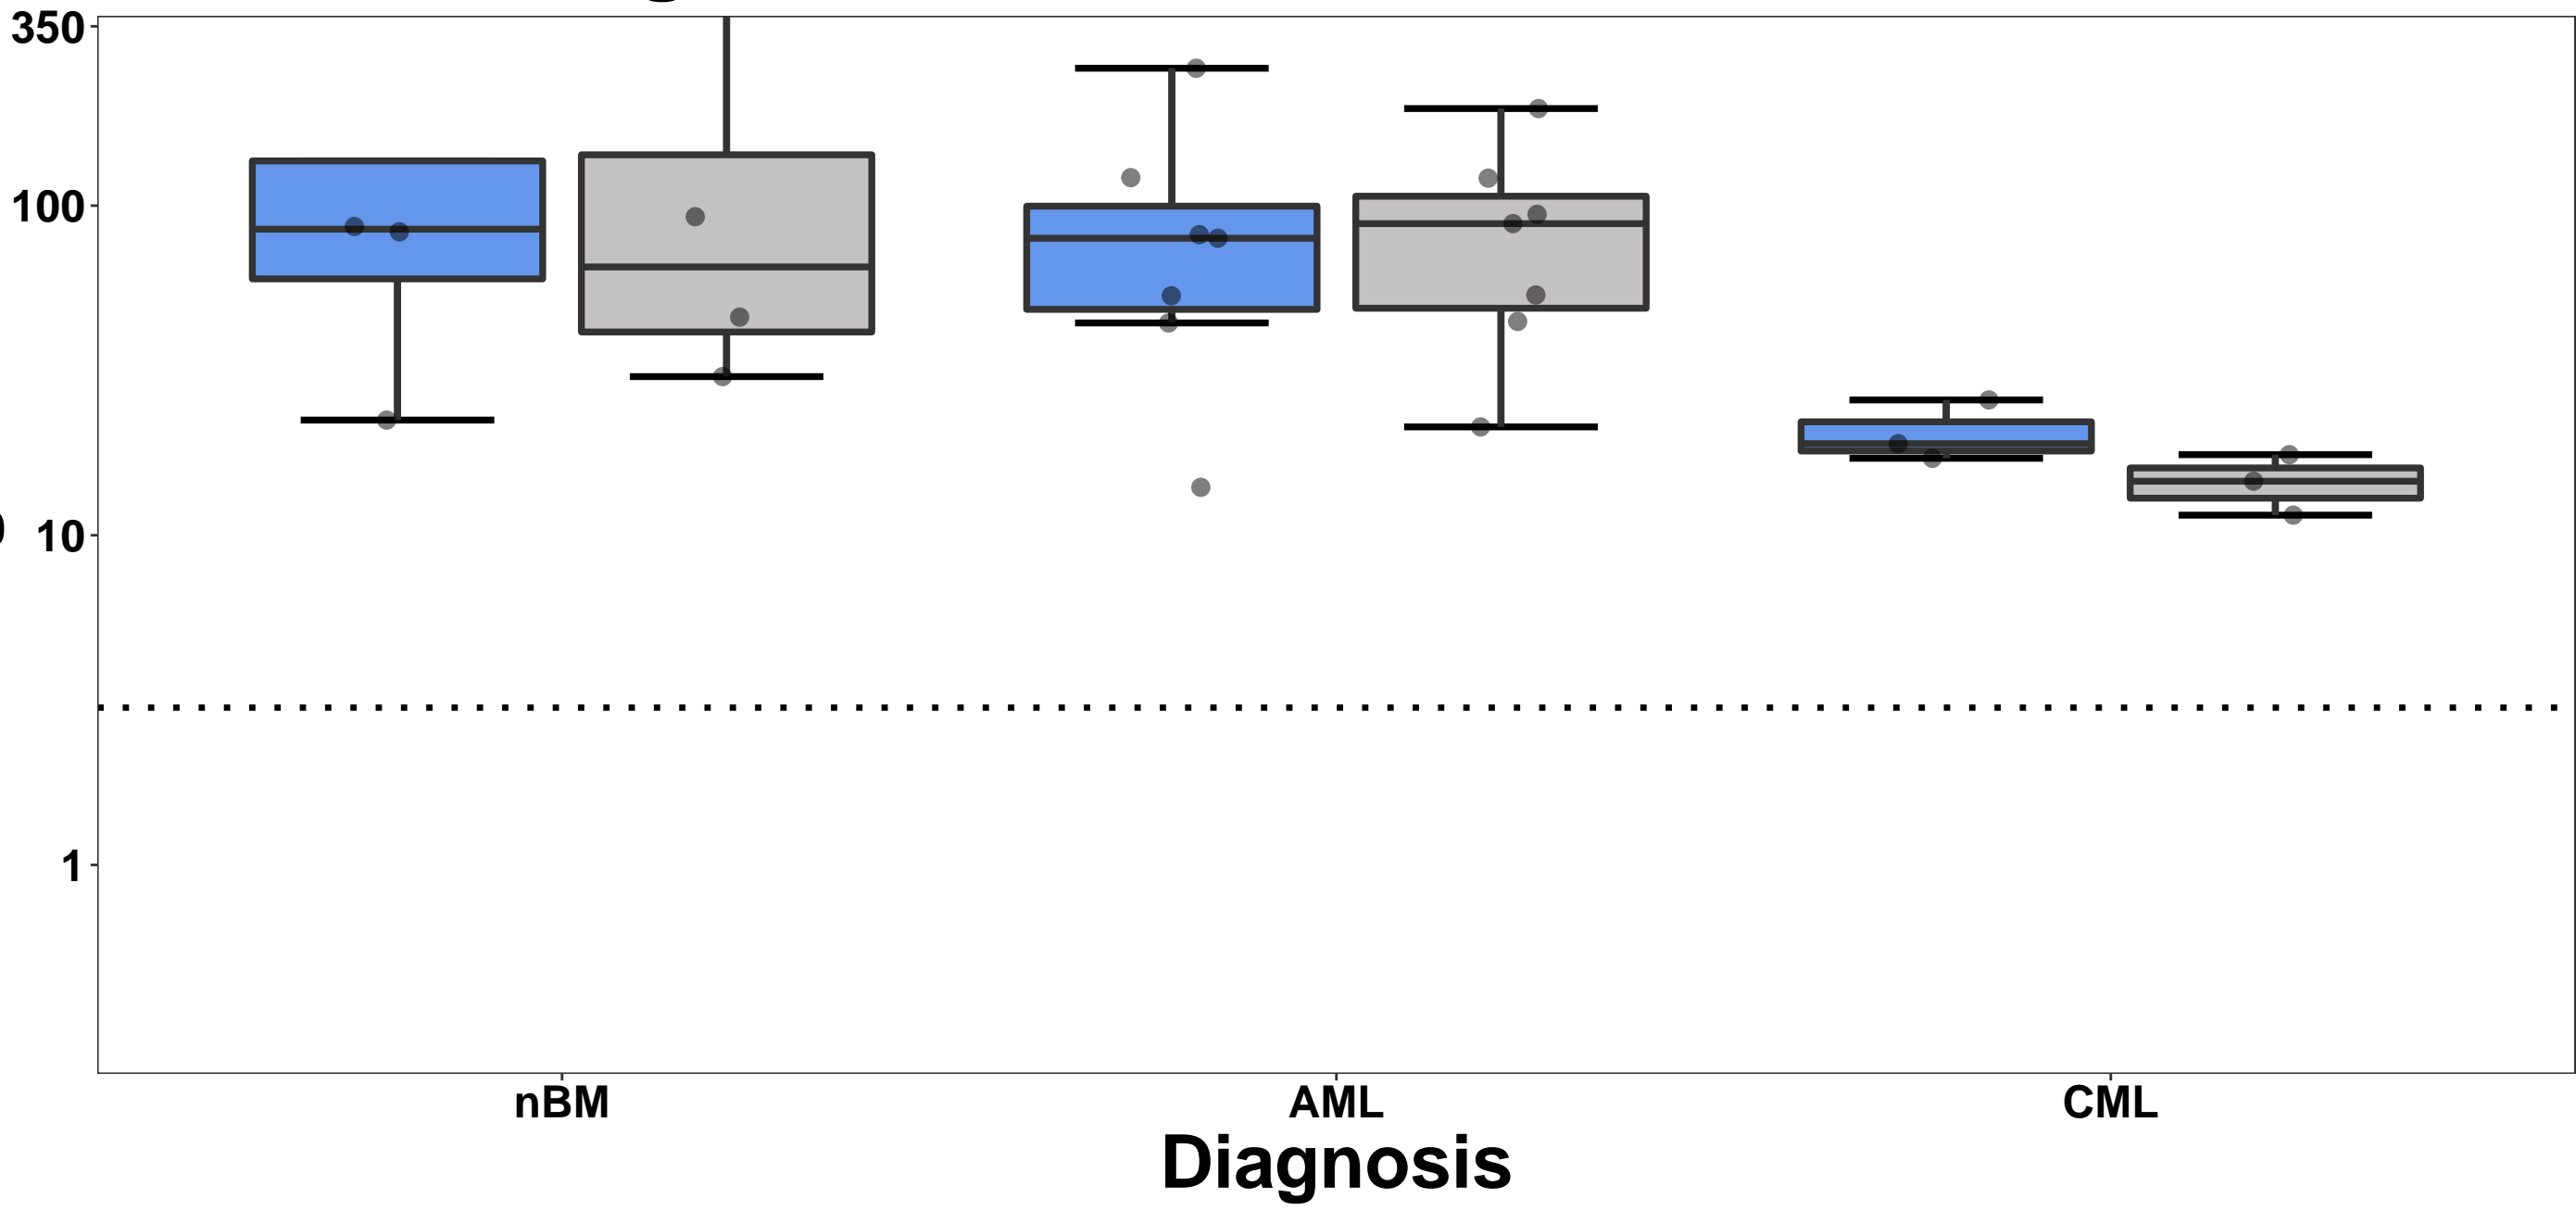



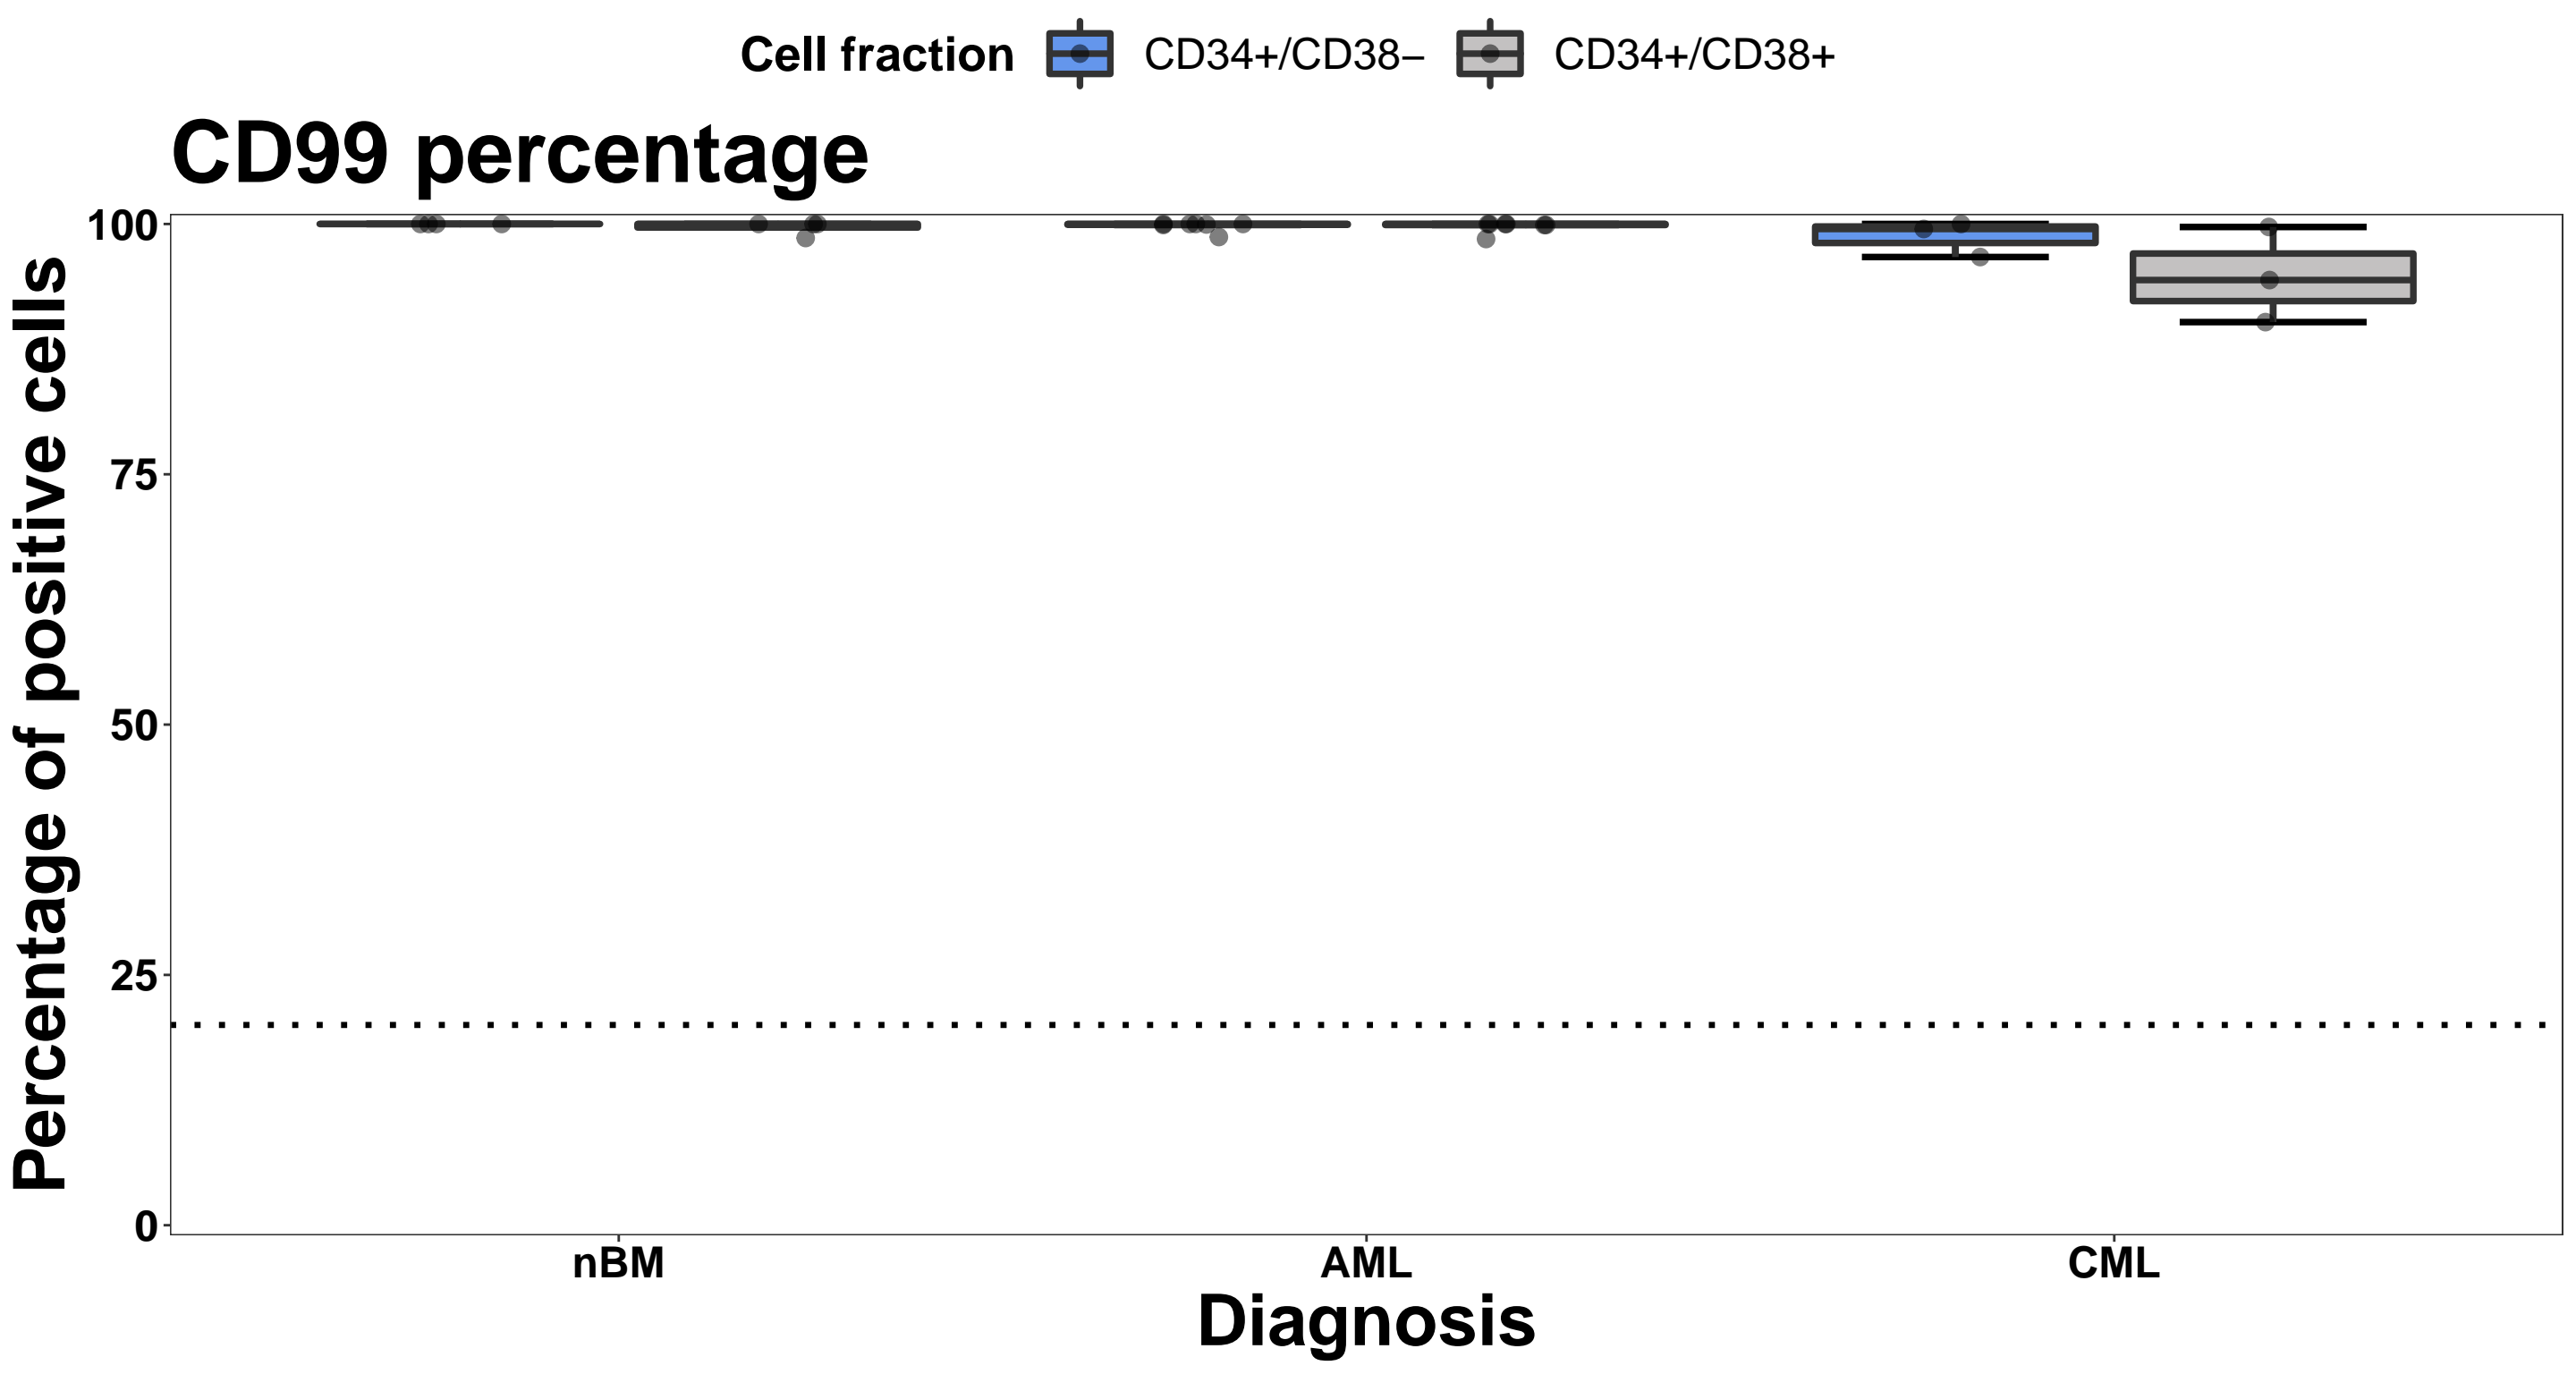

Cell fraction  CD34+/CD38-  CD34+/CD38+

# CD105 staining index

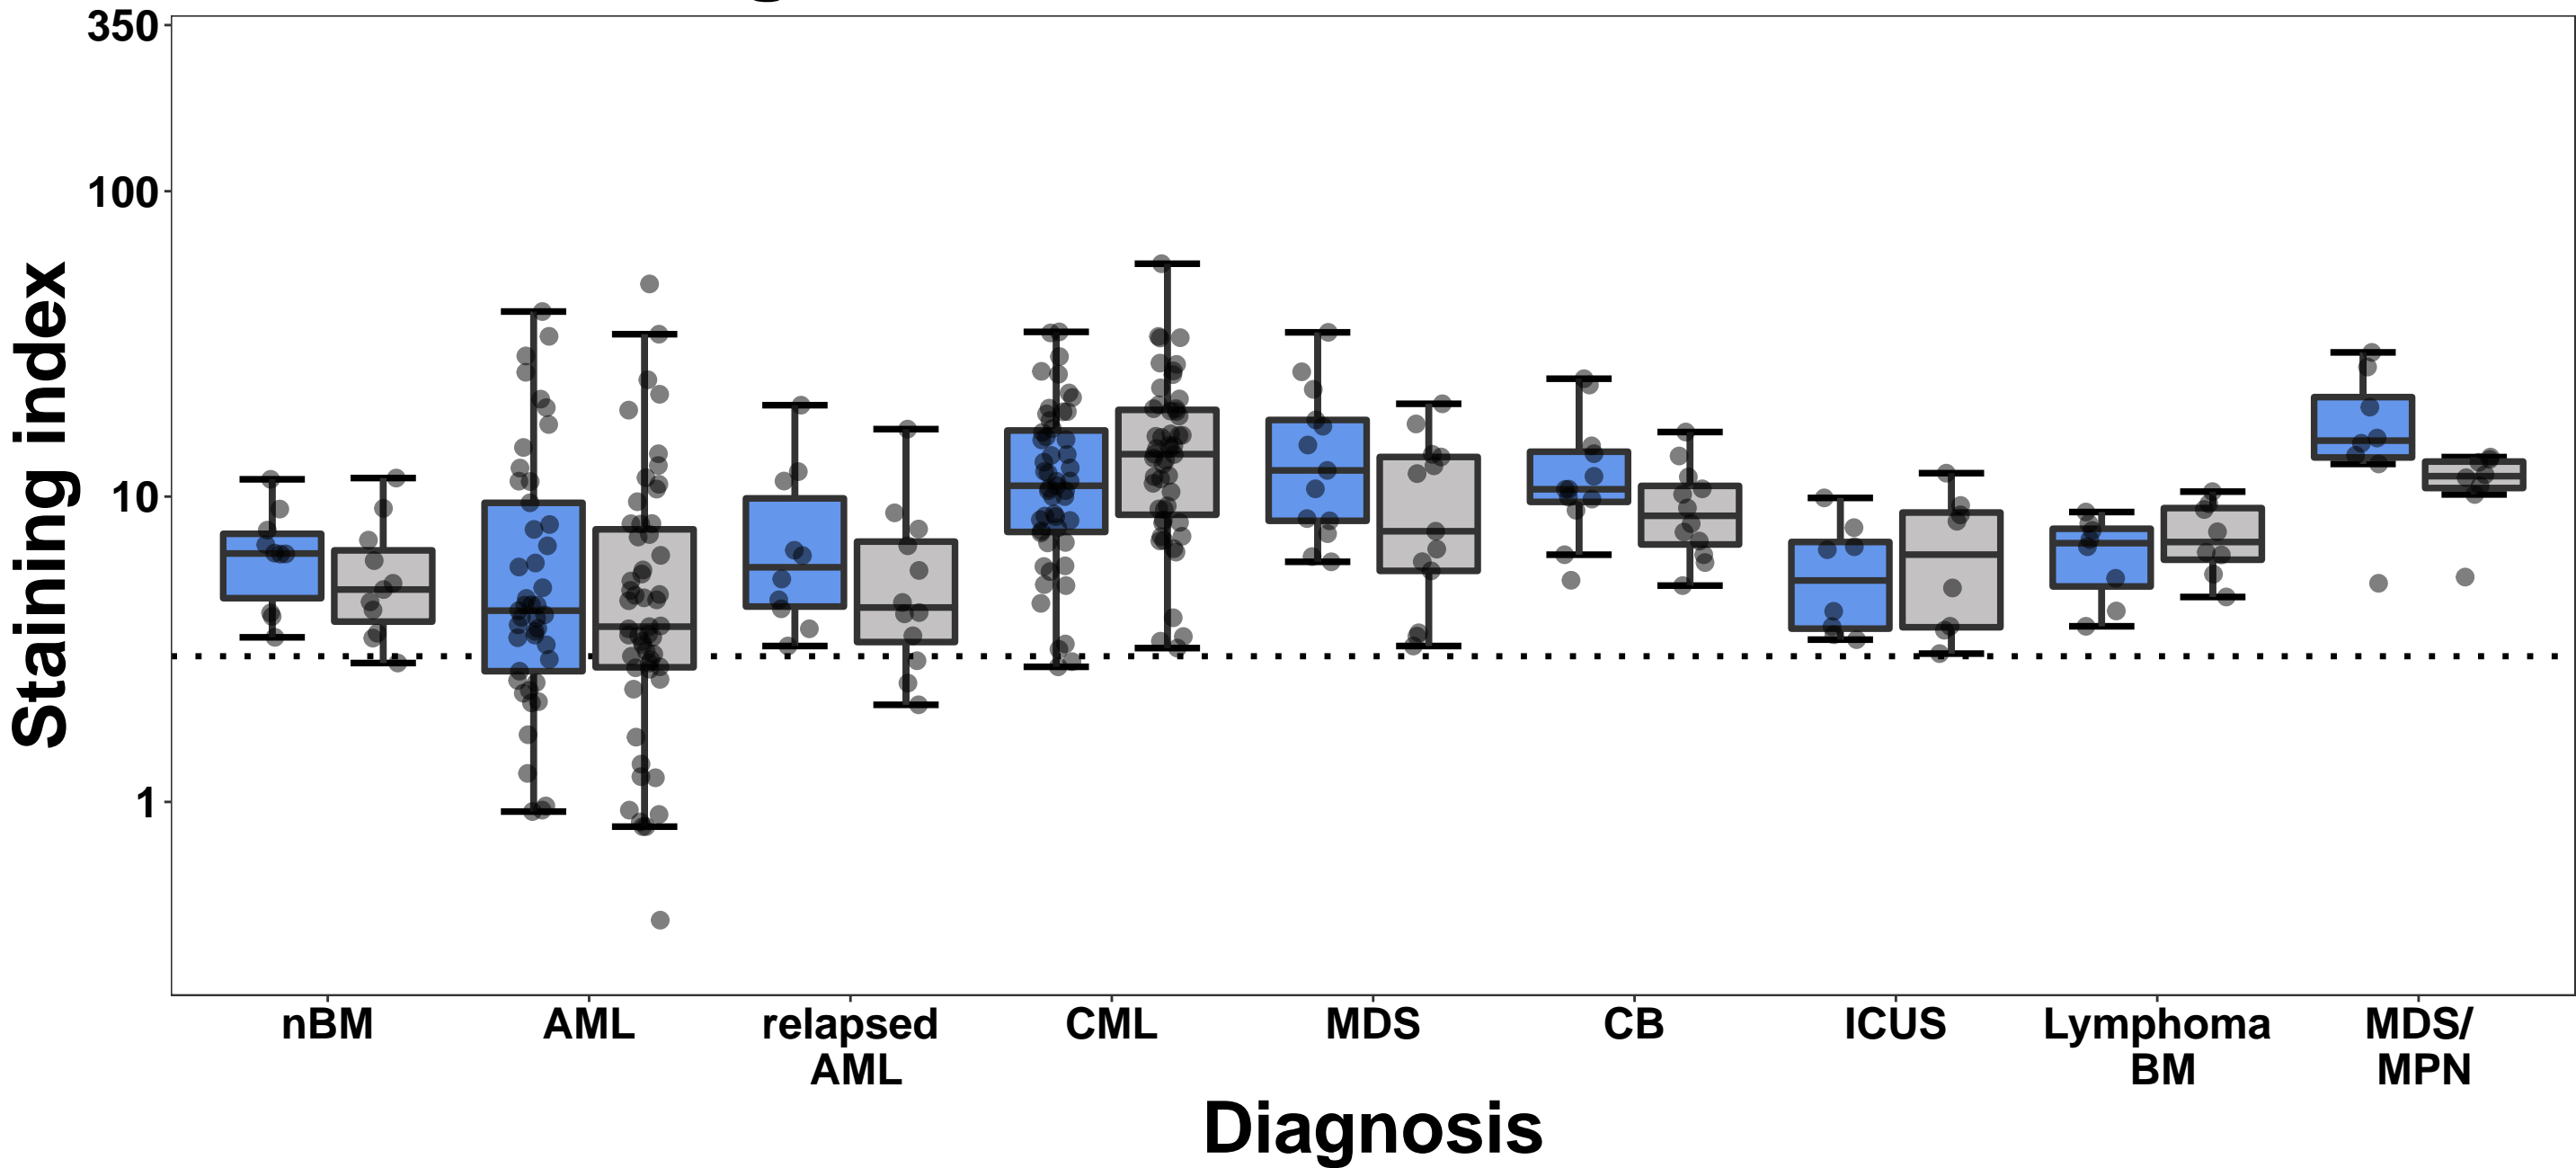

Cell fraction  CD34+/CD38-  CD34+/CD38+

# CD105 percentage

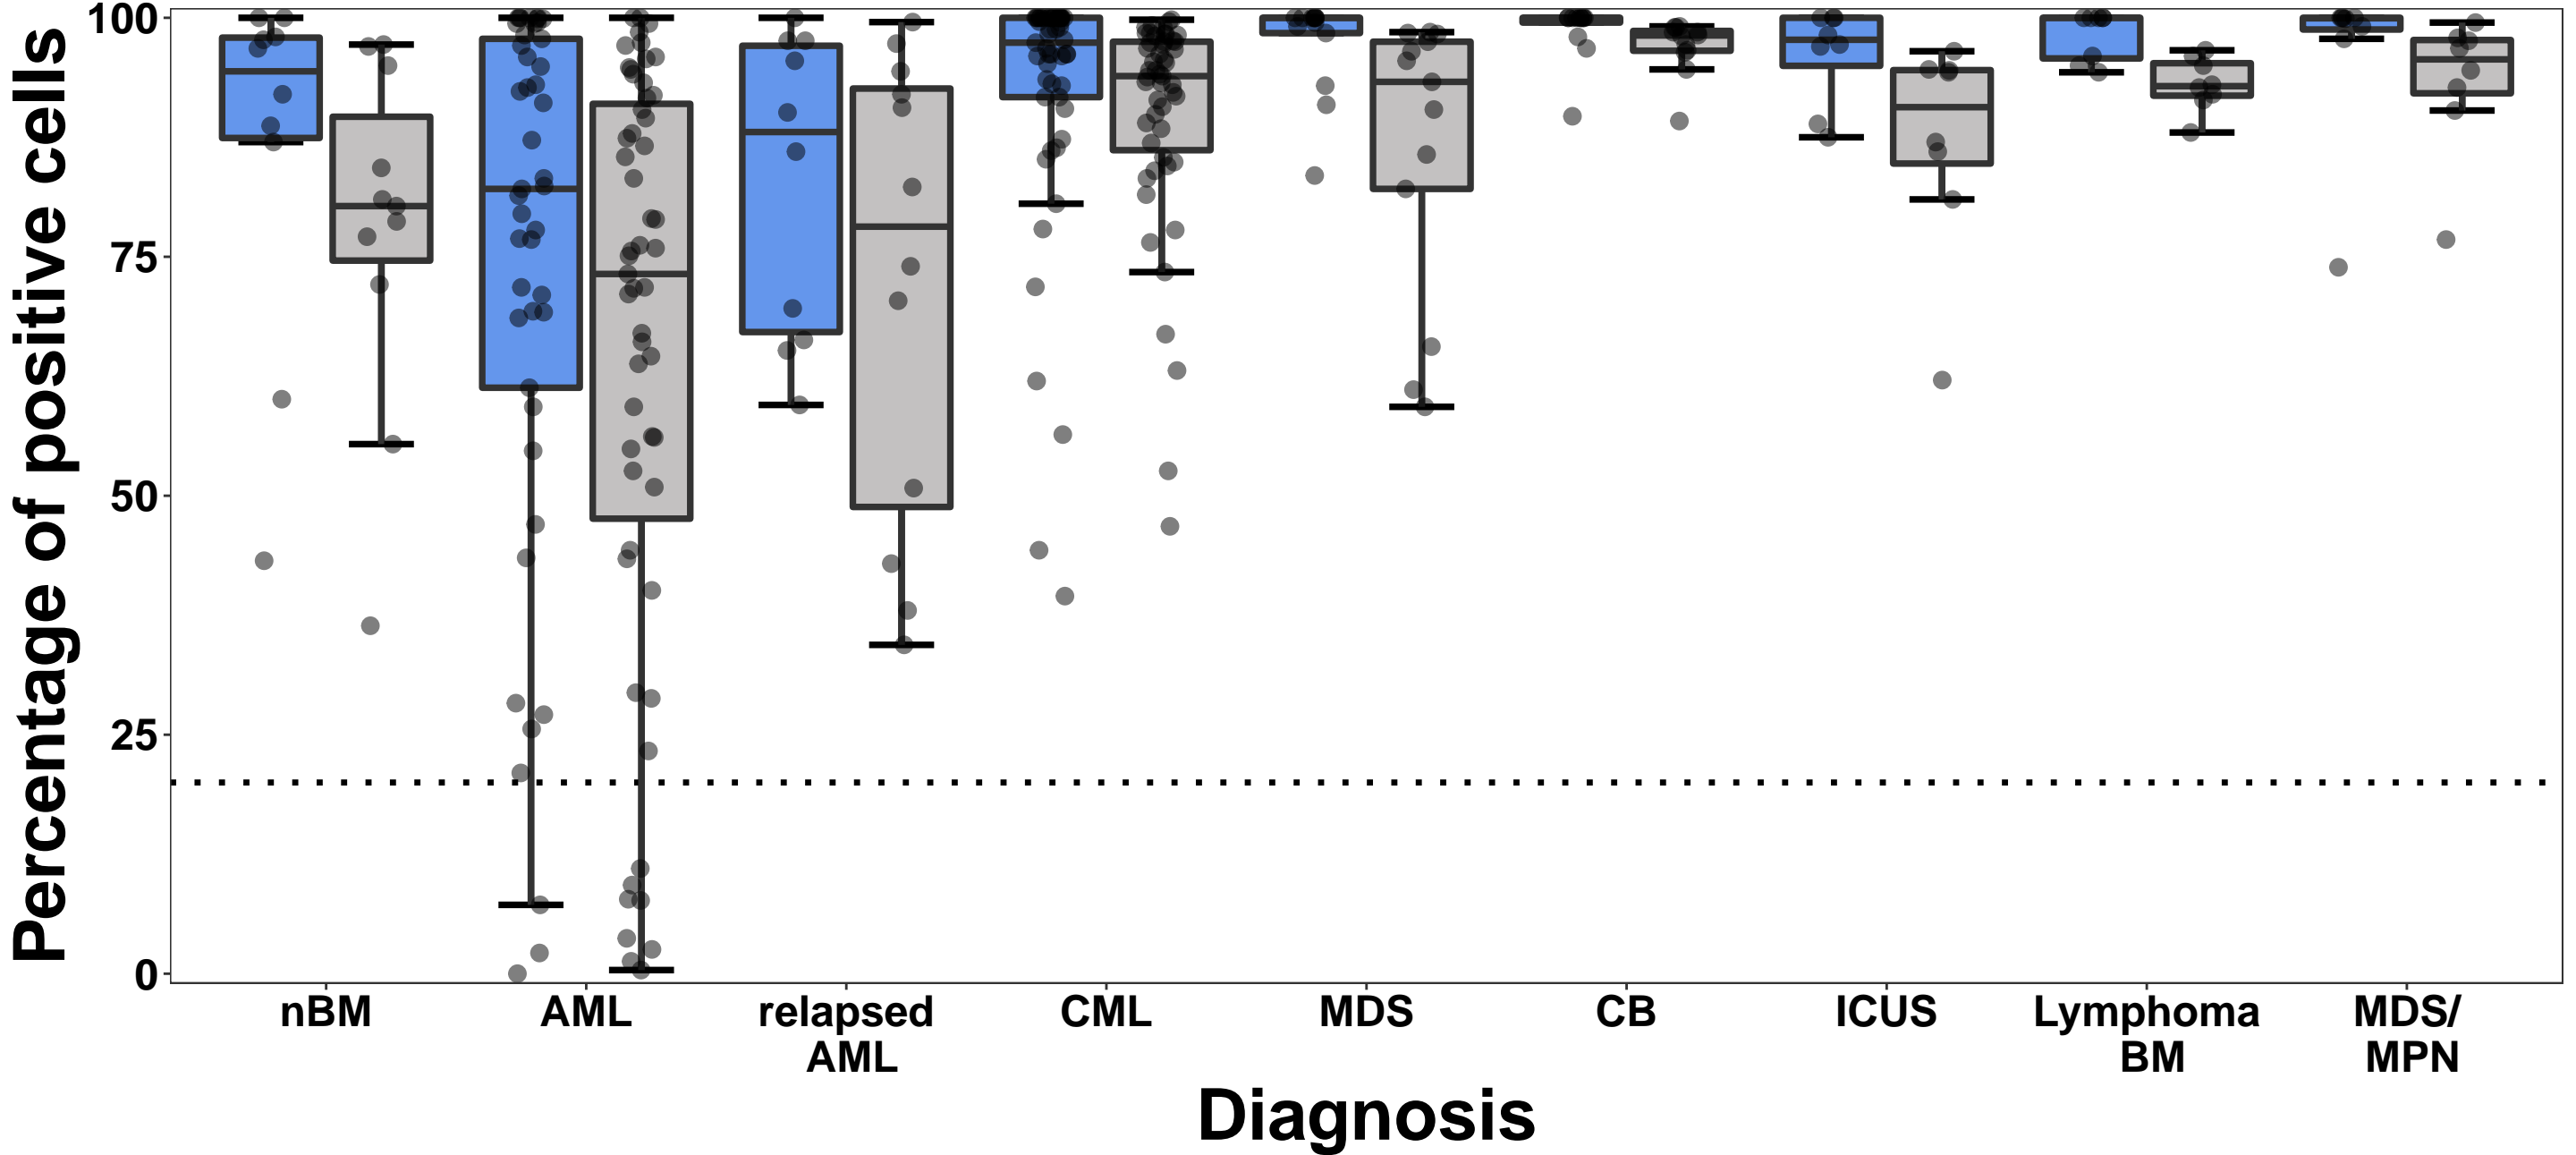

# CD110 staining index

Cell fraction  CD34+/CD38-  CD34+/CD38+

Staining index

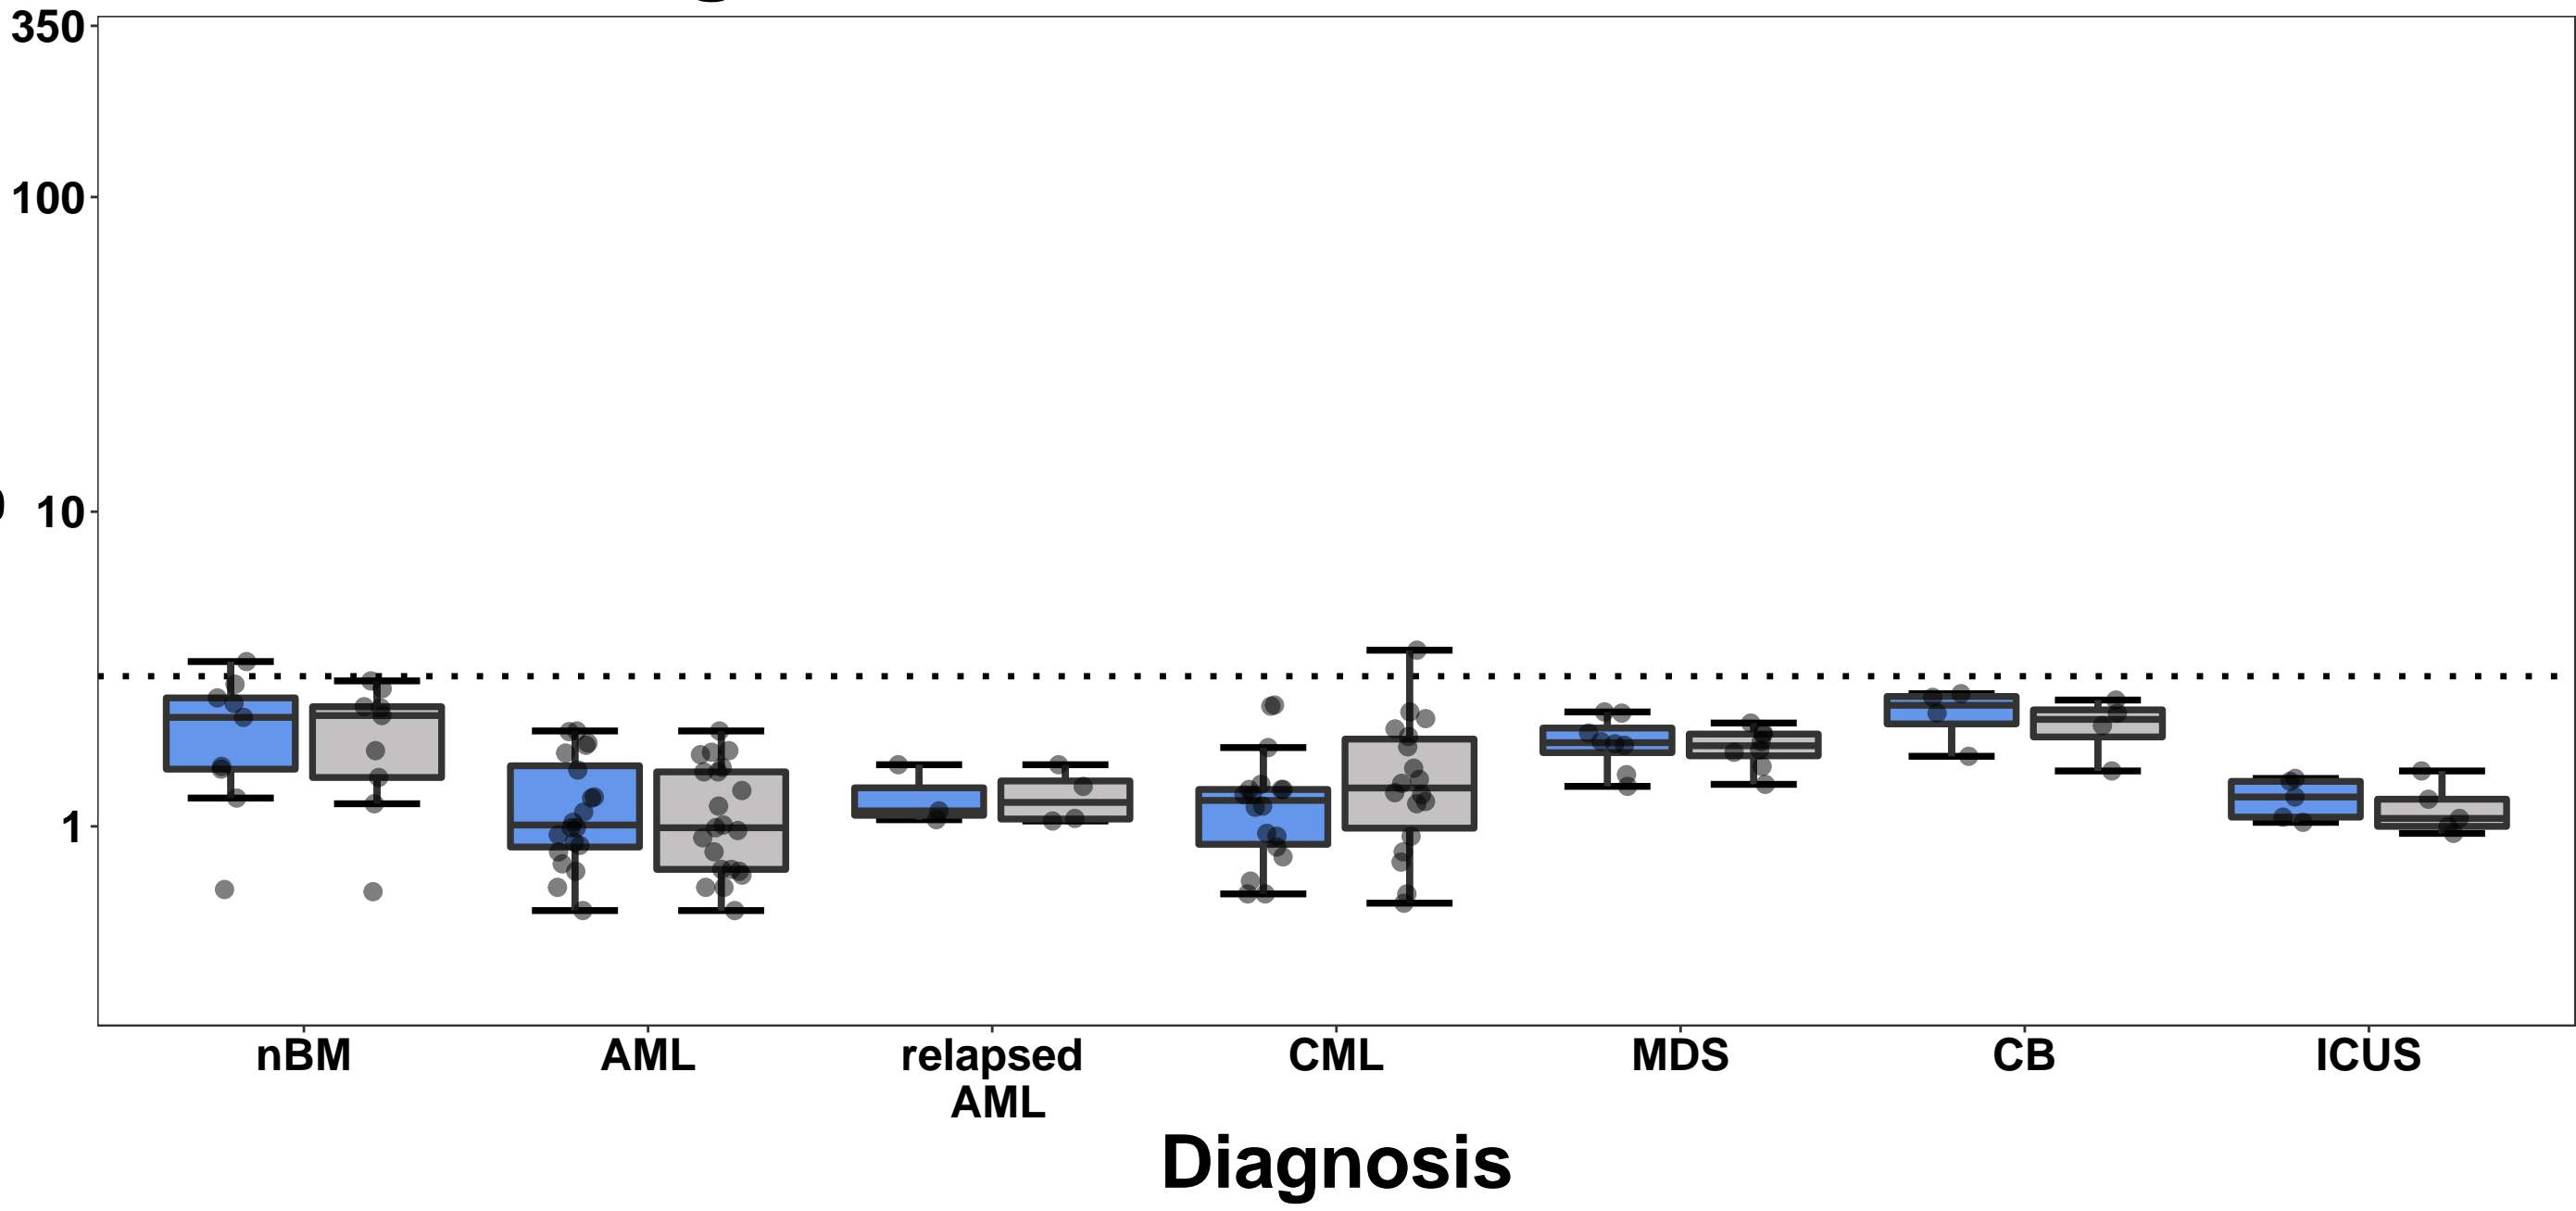

Cell fraction  CD34+/CD38-  CD34+/CD38+

# CD110 percentage

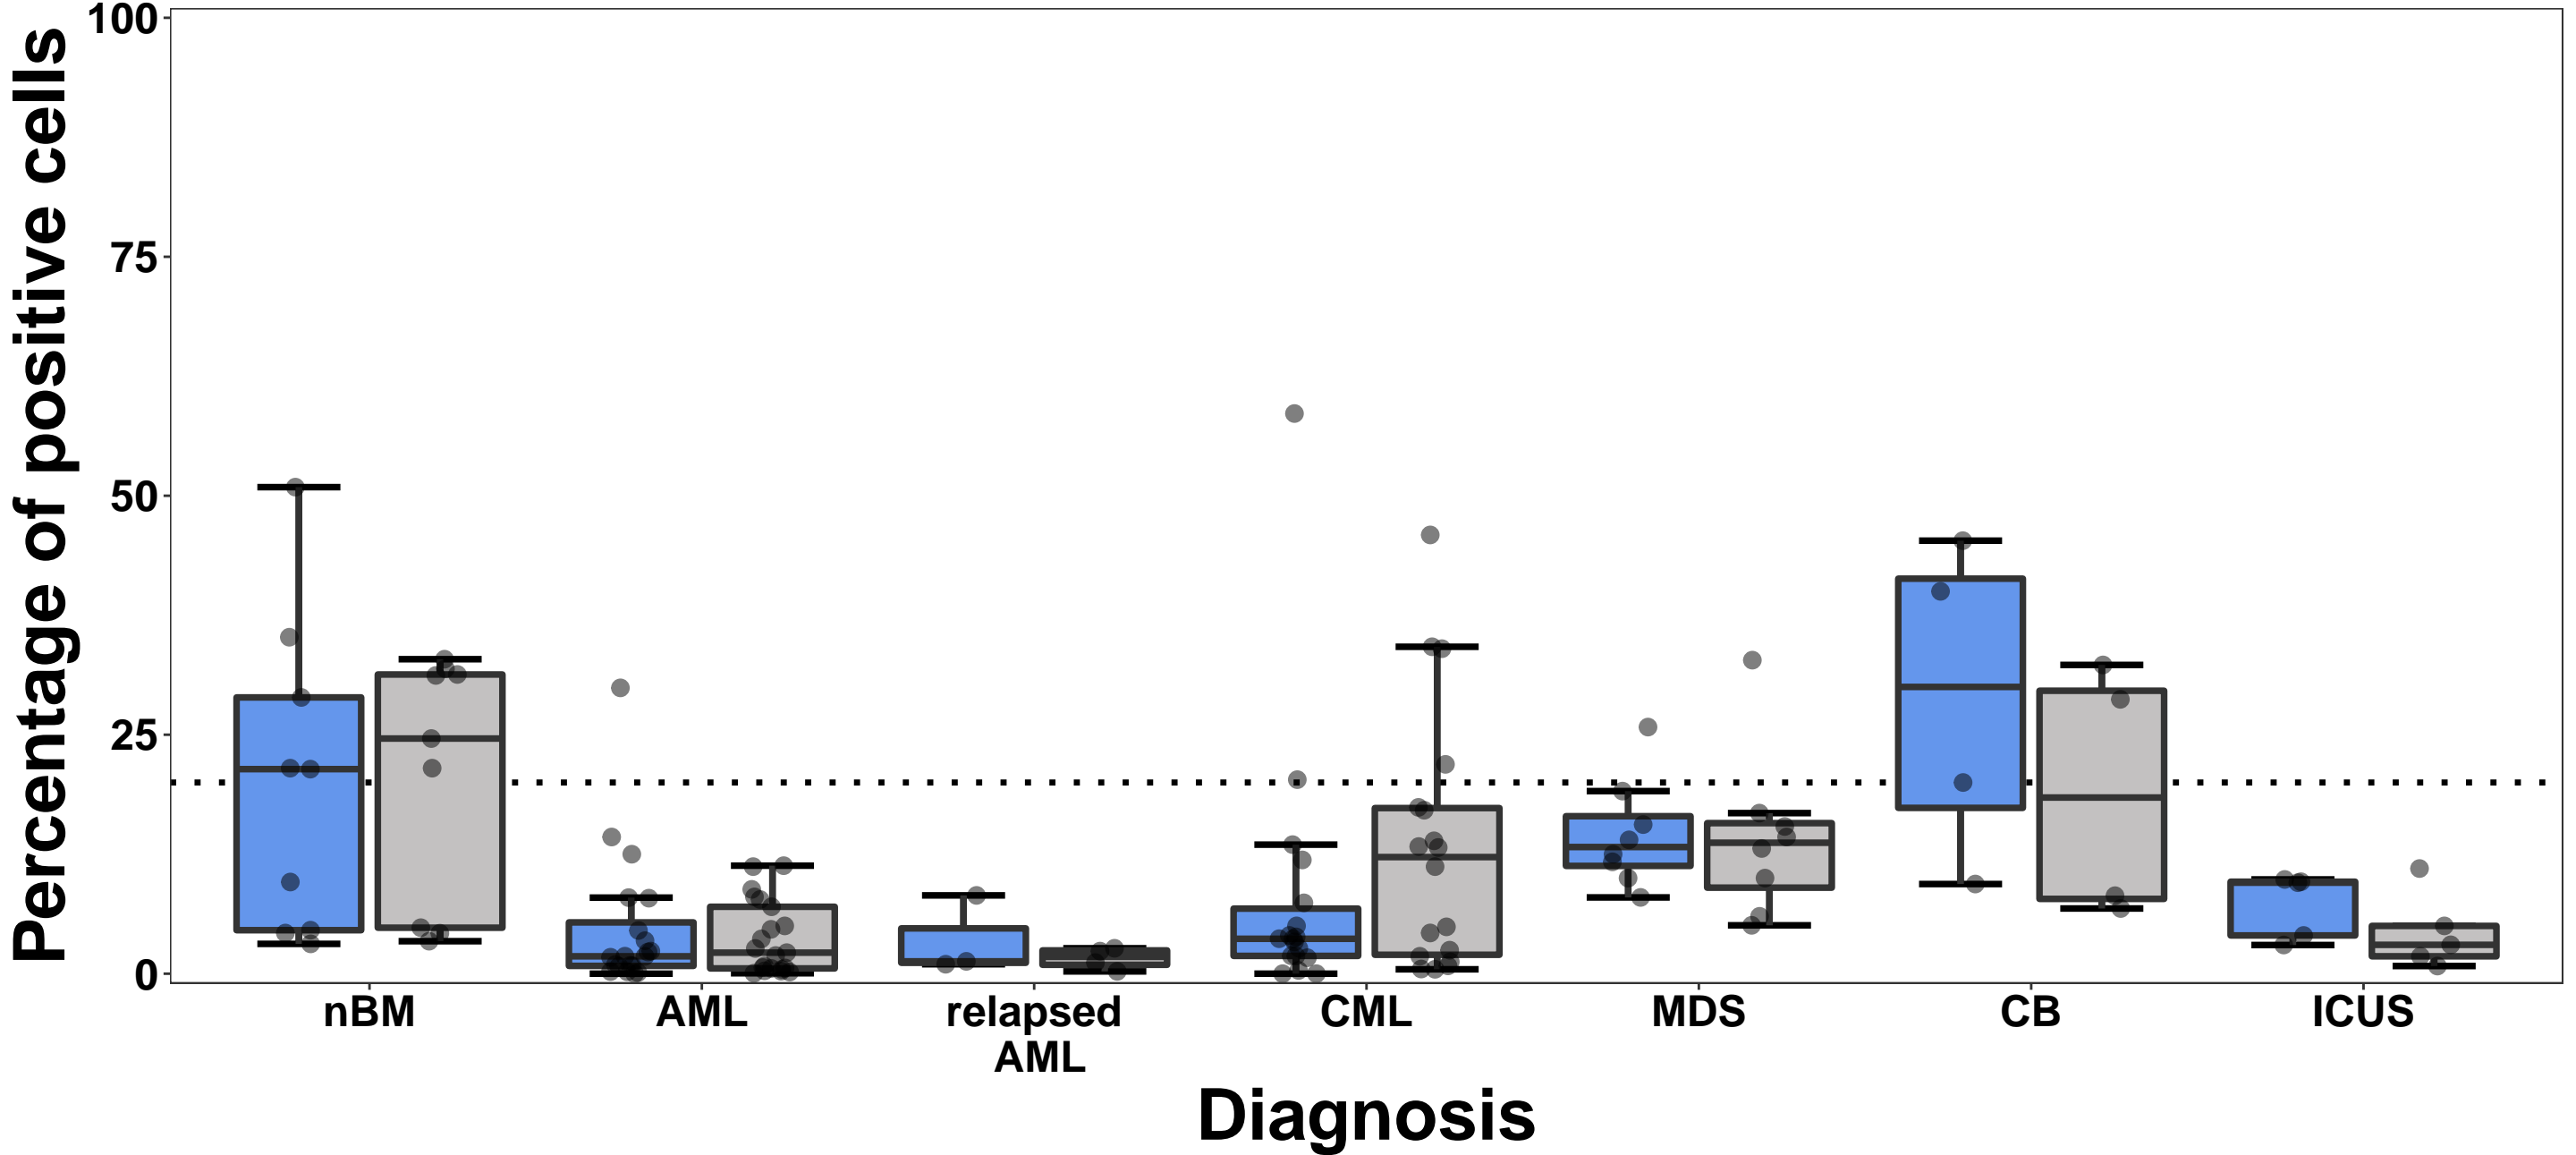

Cell fraction  CD34+/CD38-  CD34+/CD38+

# CD114 staining index

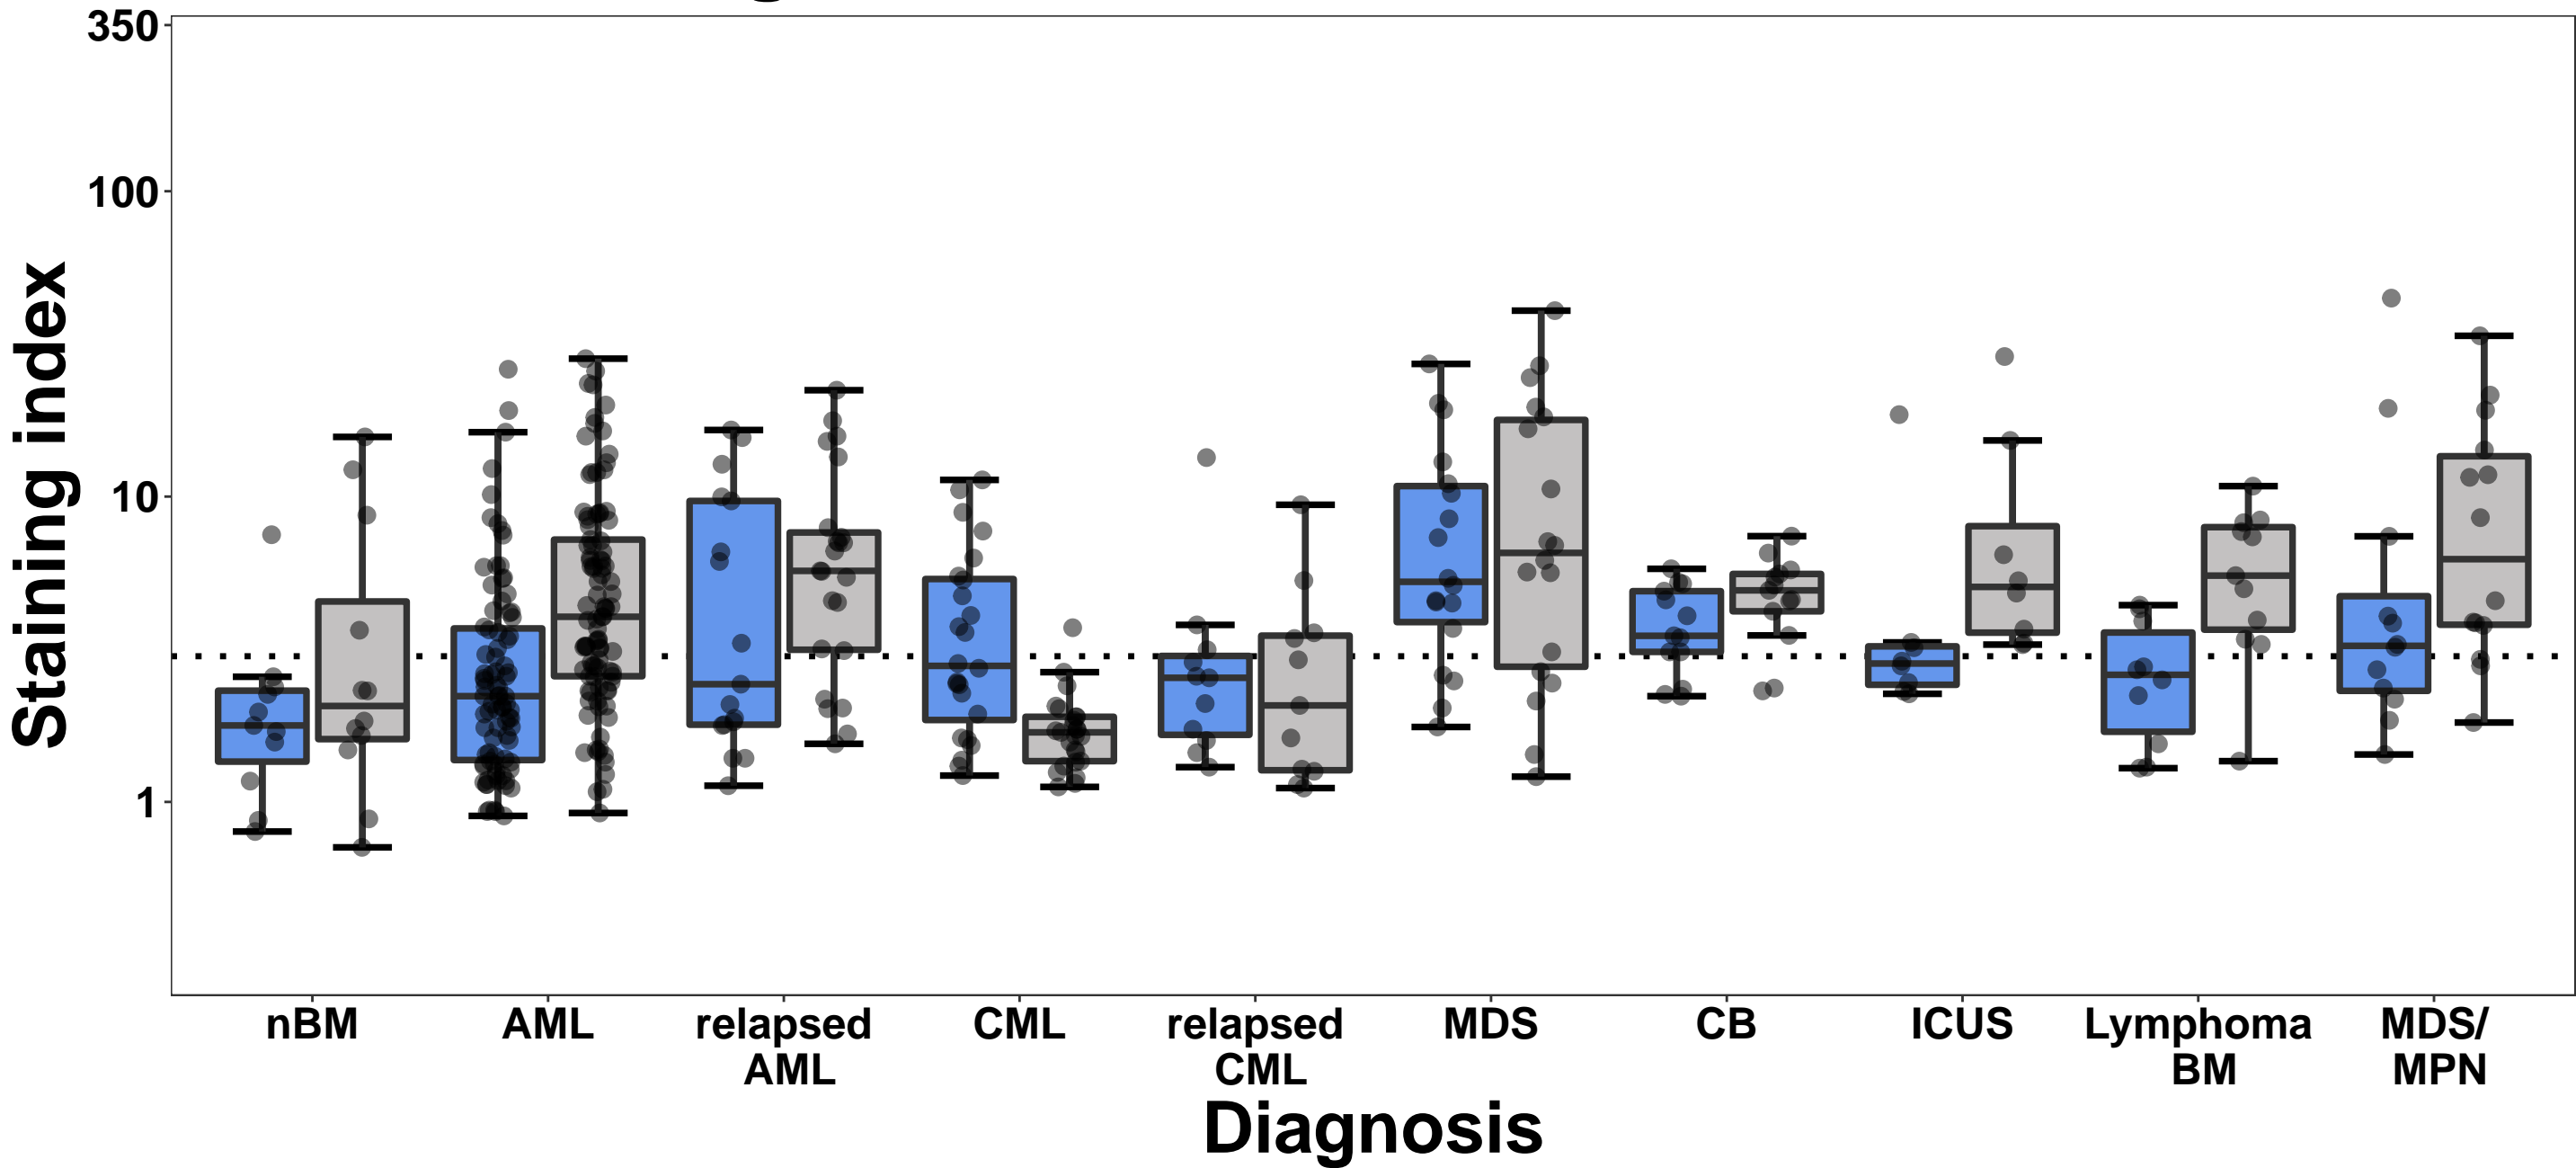

Cell fraction  CD34+/CD38-  CD34+/CD38+

# CD114 percentage

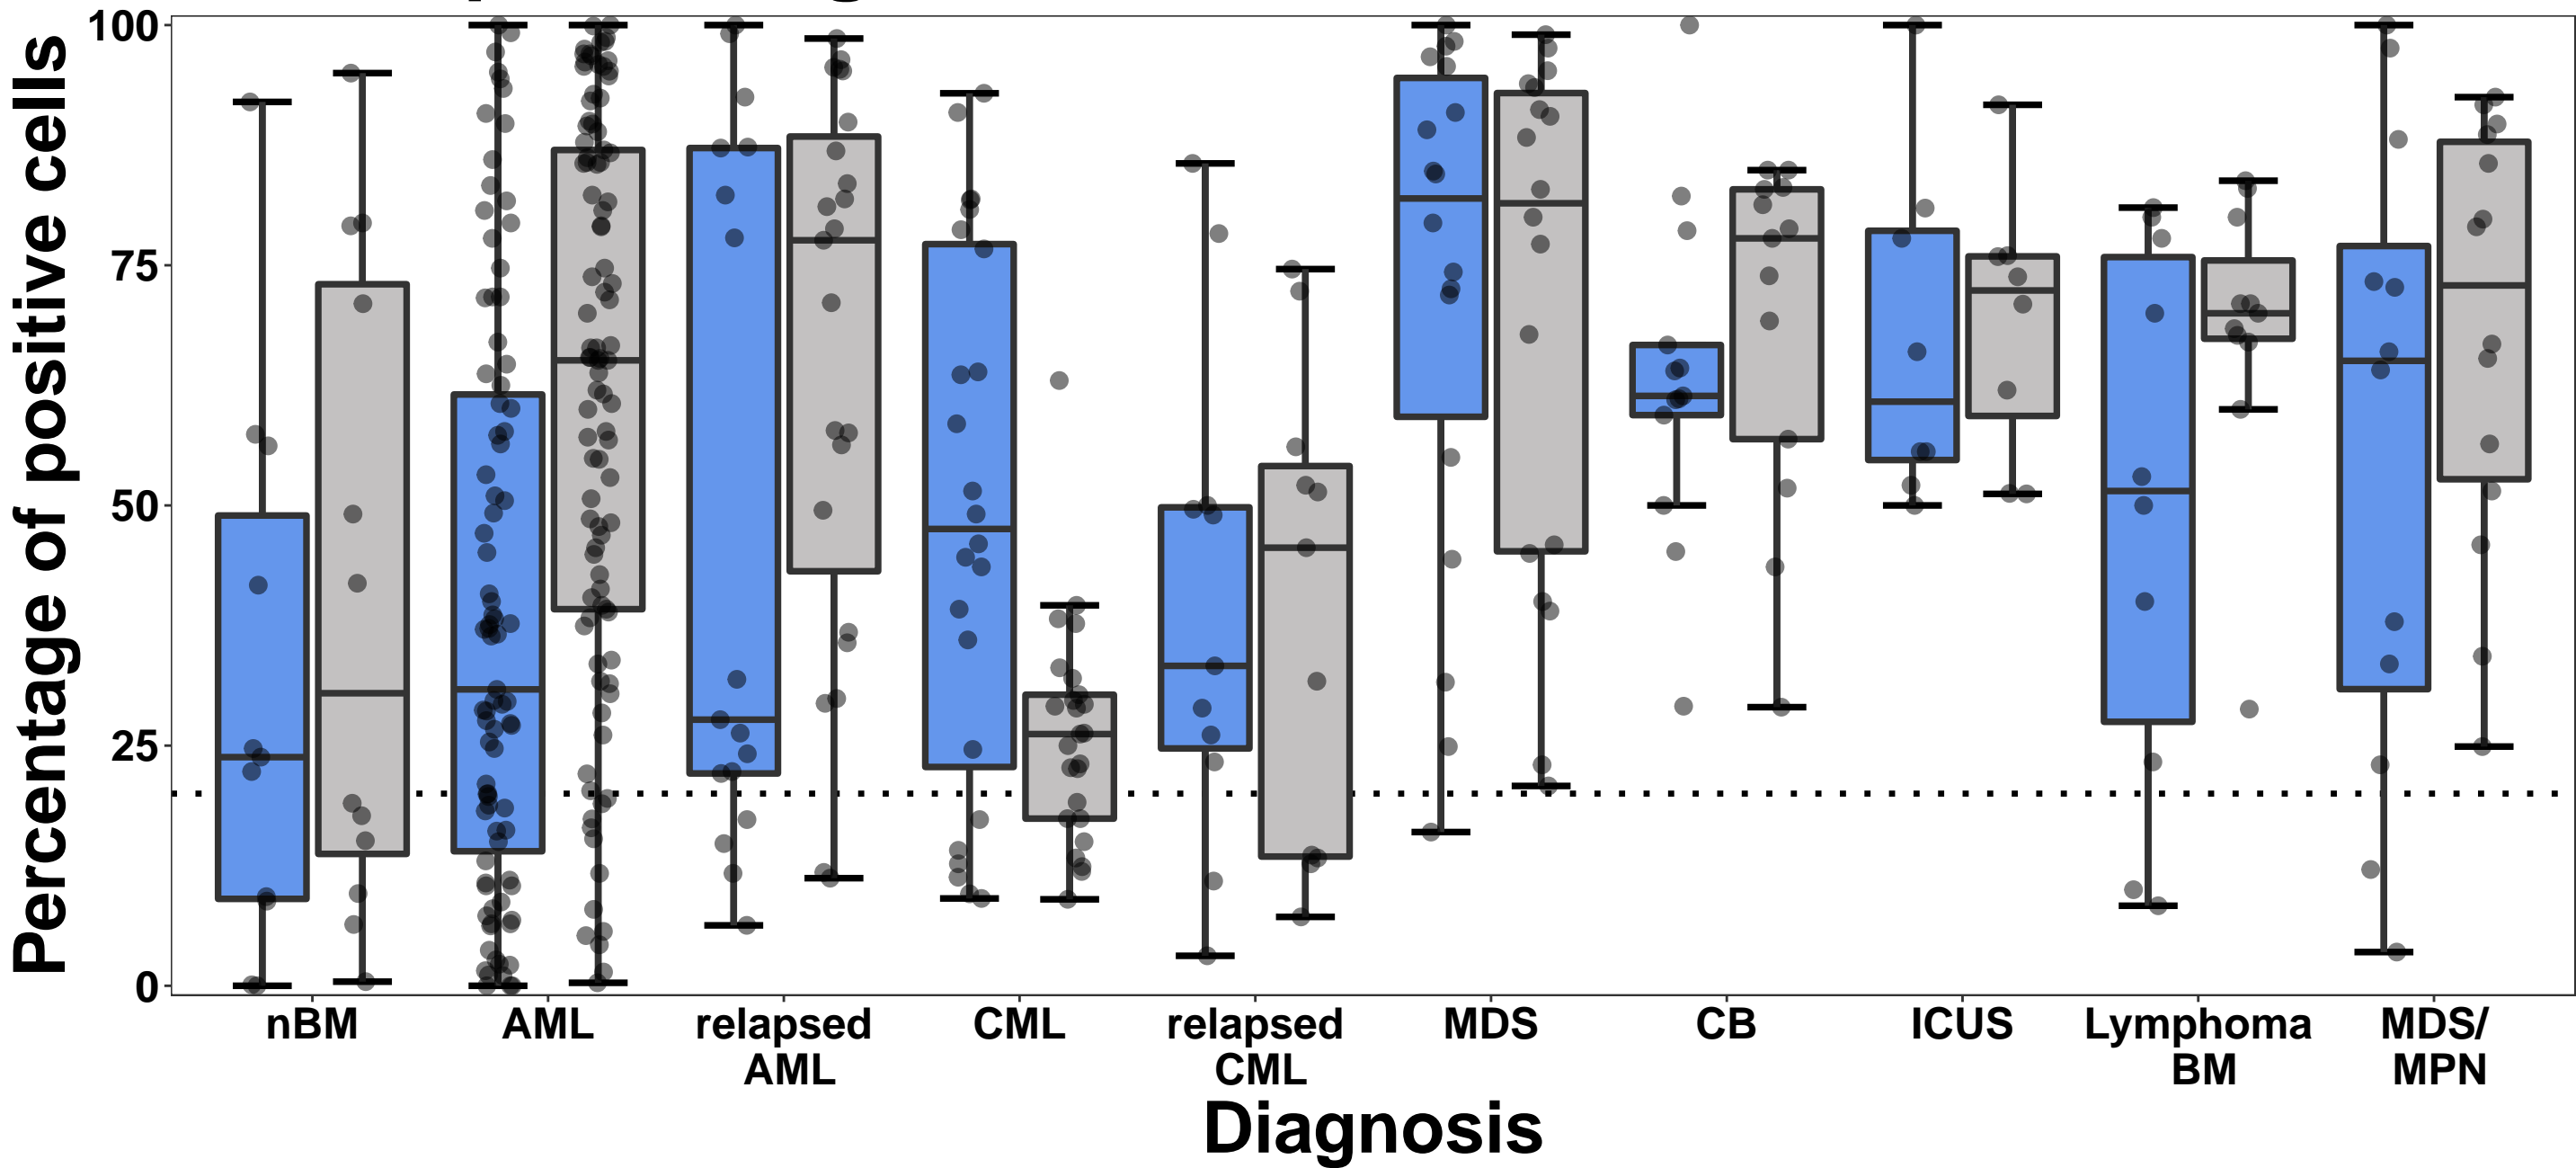

Cell fraction  CD34+/CD38-  CD34+/CD38+

# CD115 staining index

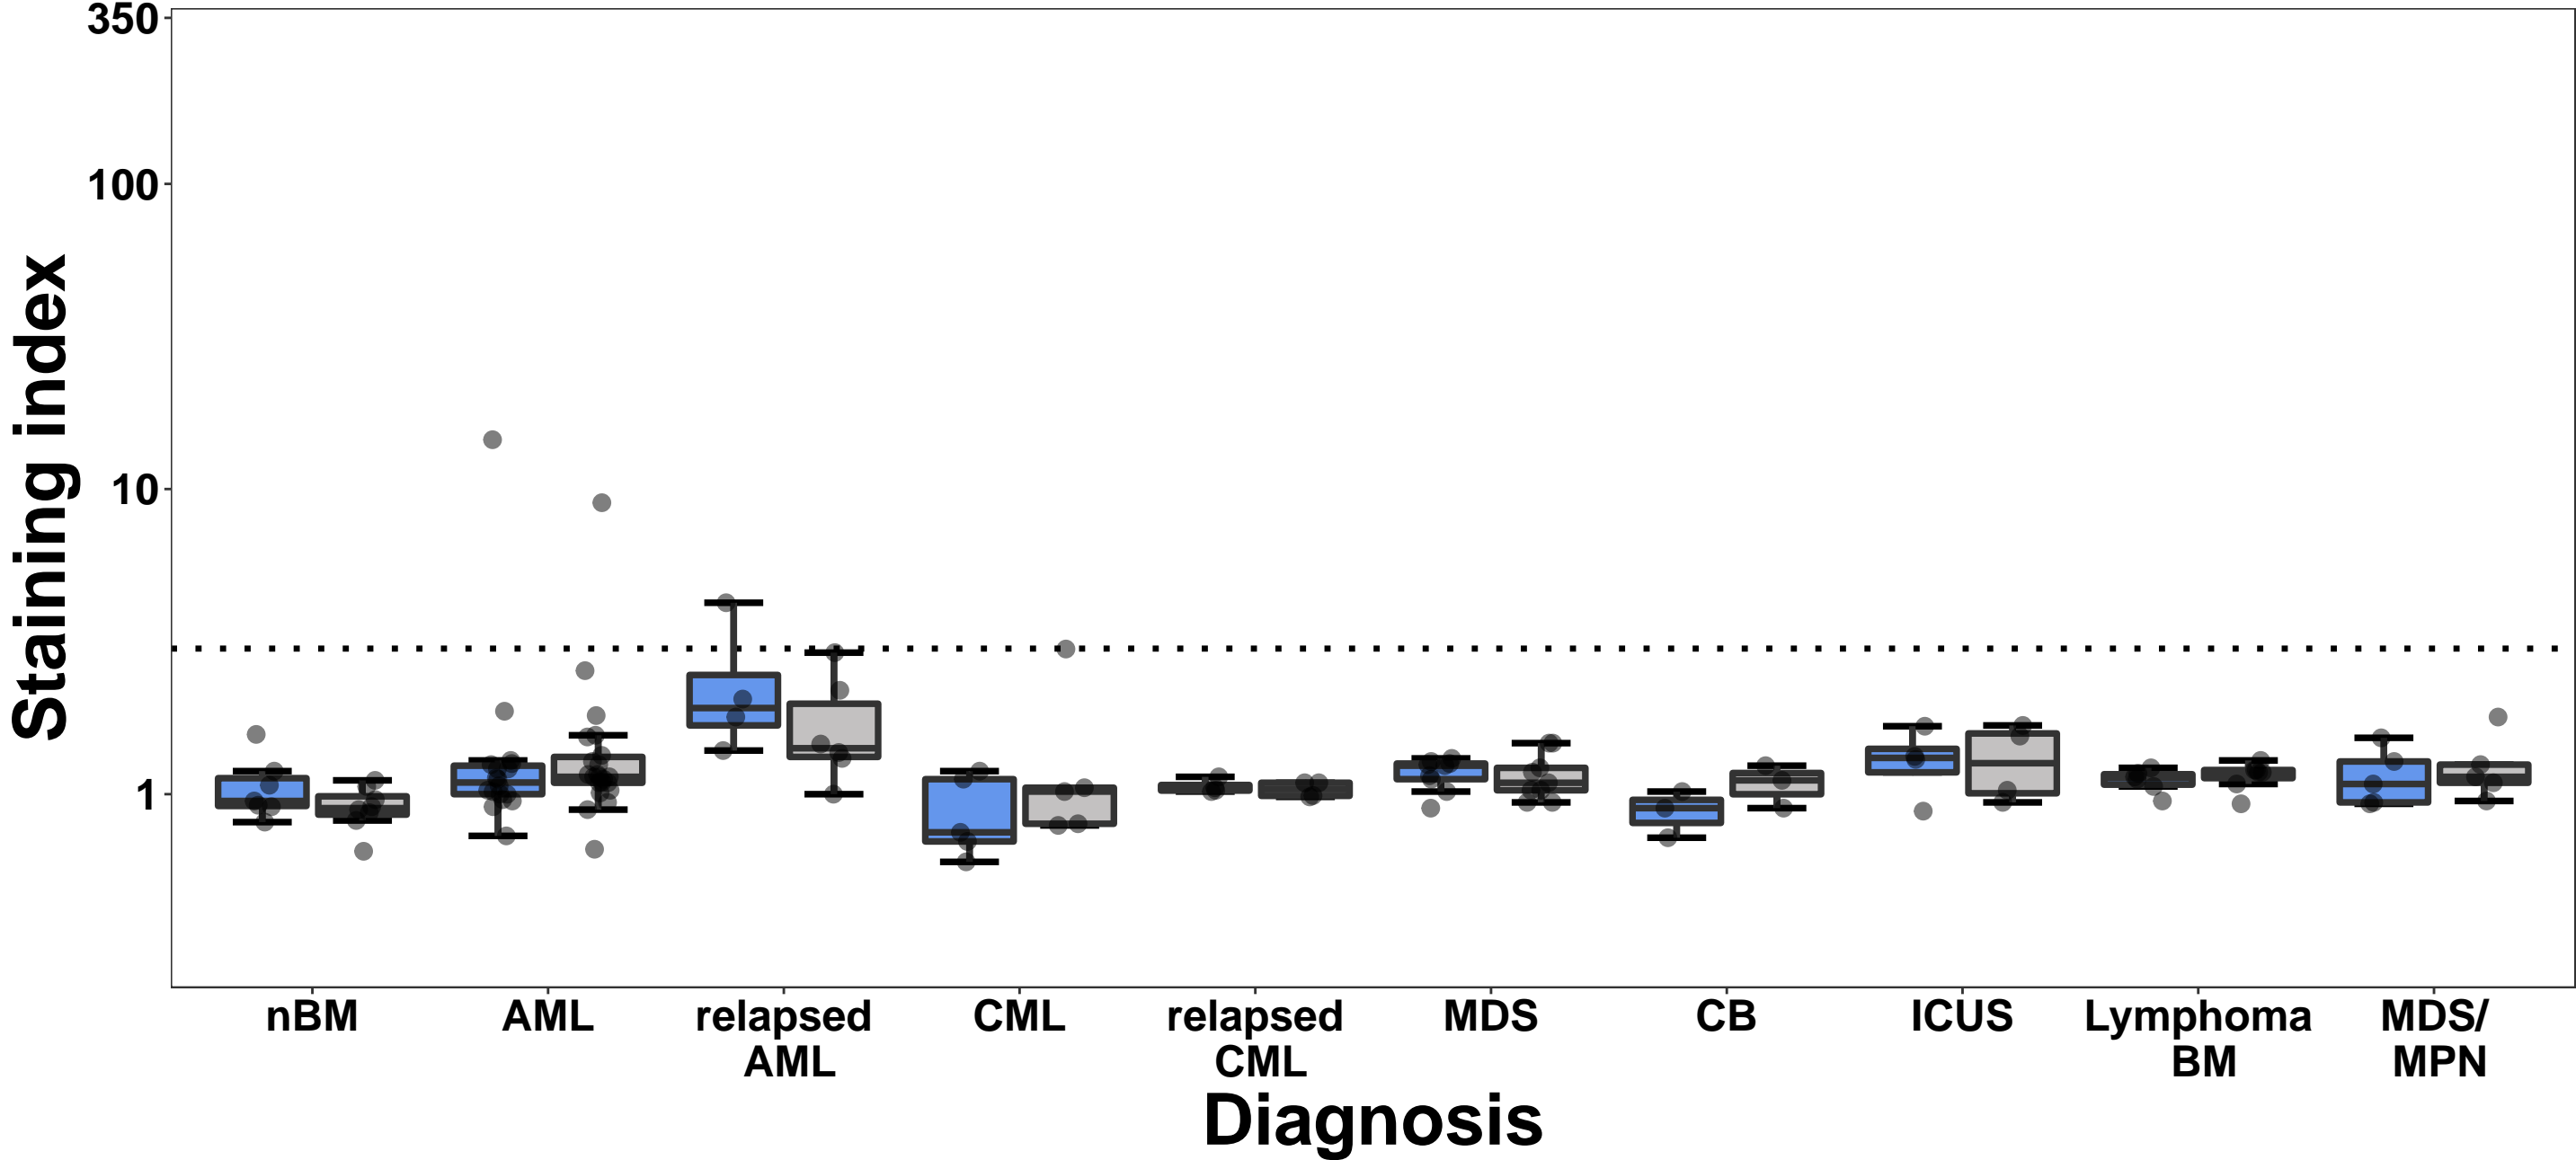



Cell fraction  CD34+/CD38-  CD34+/CD38+

# CD115 percentage

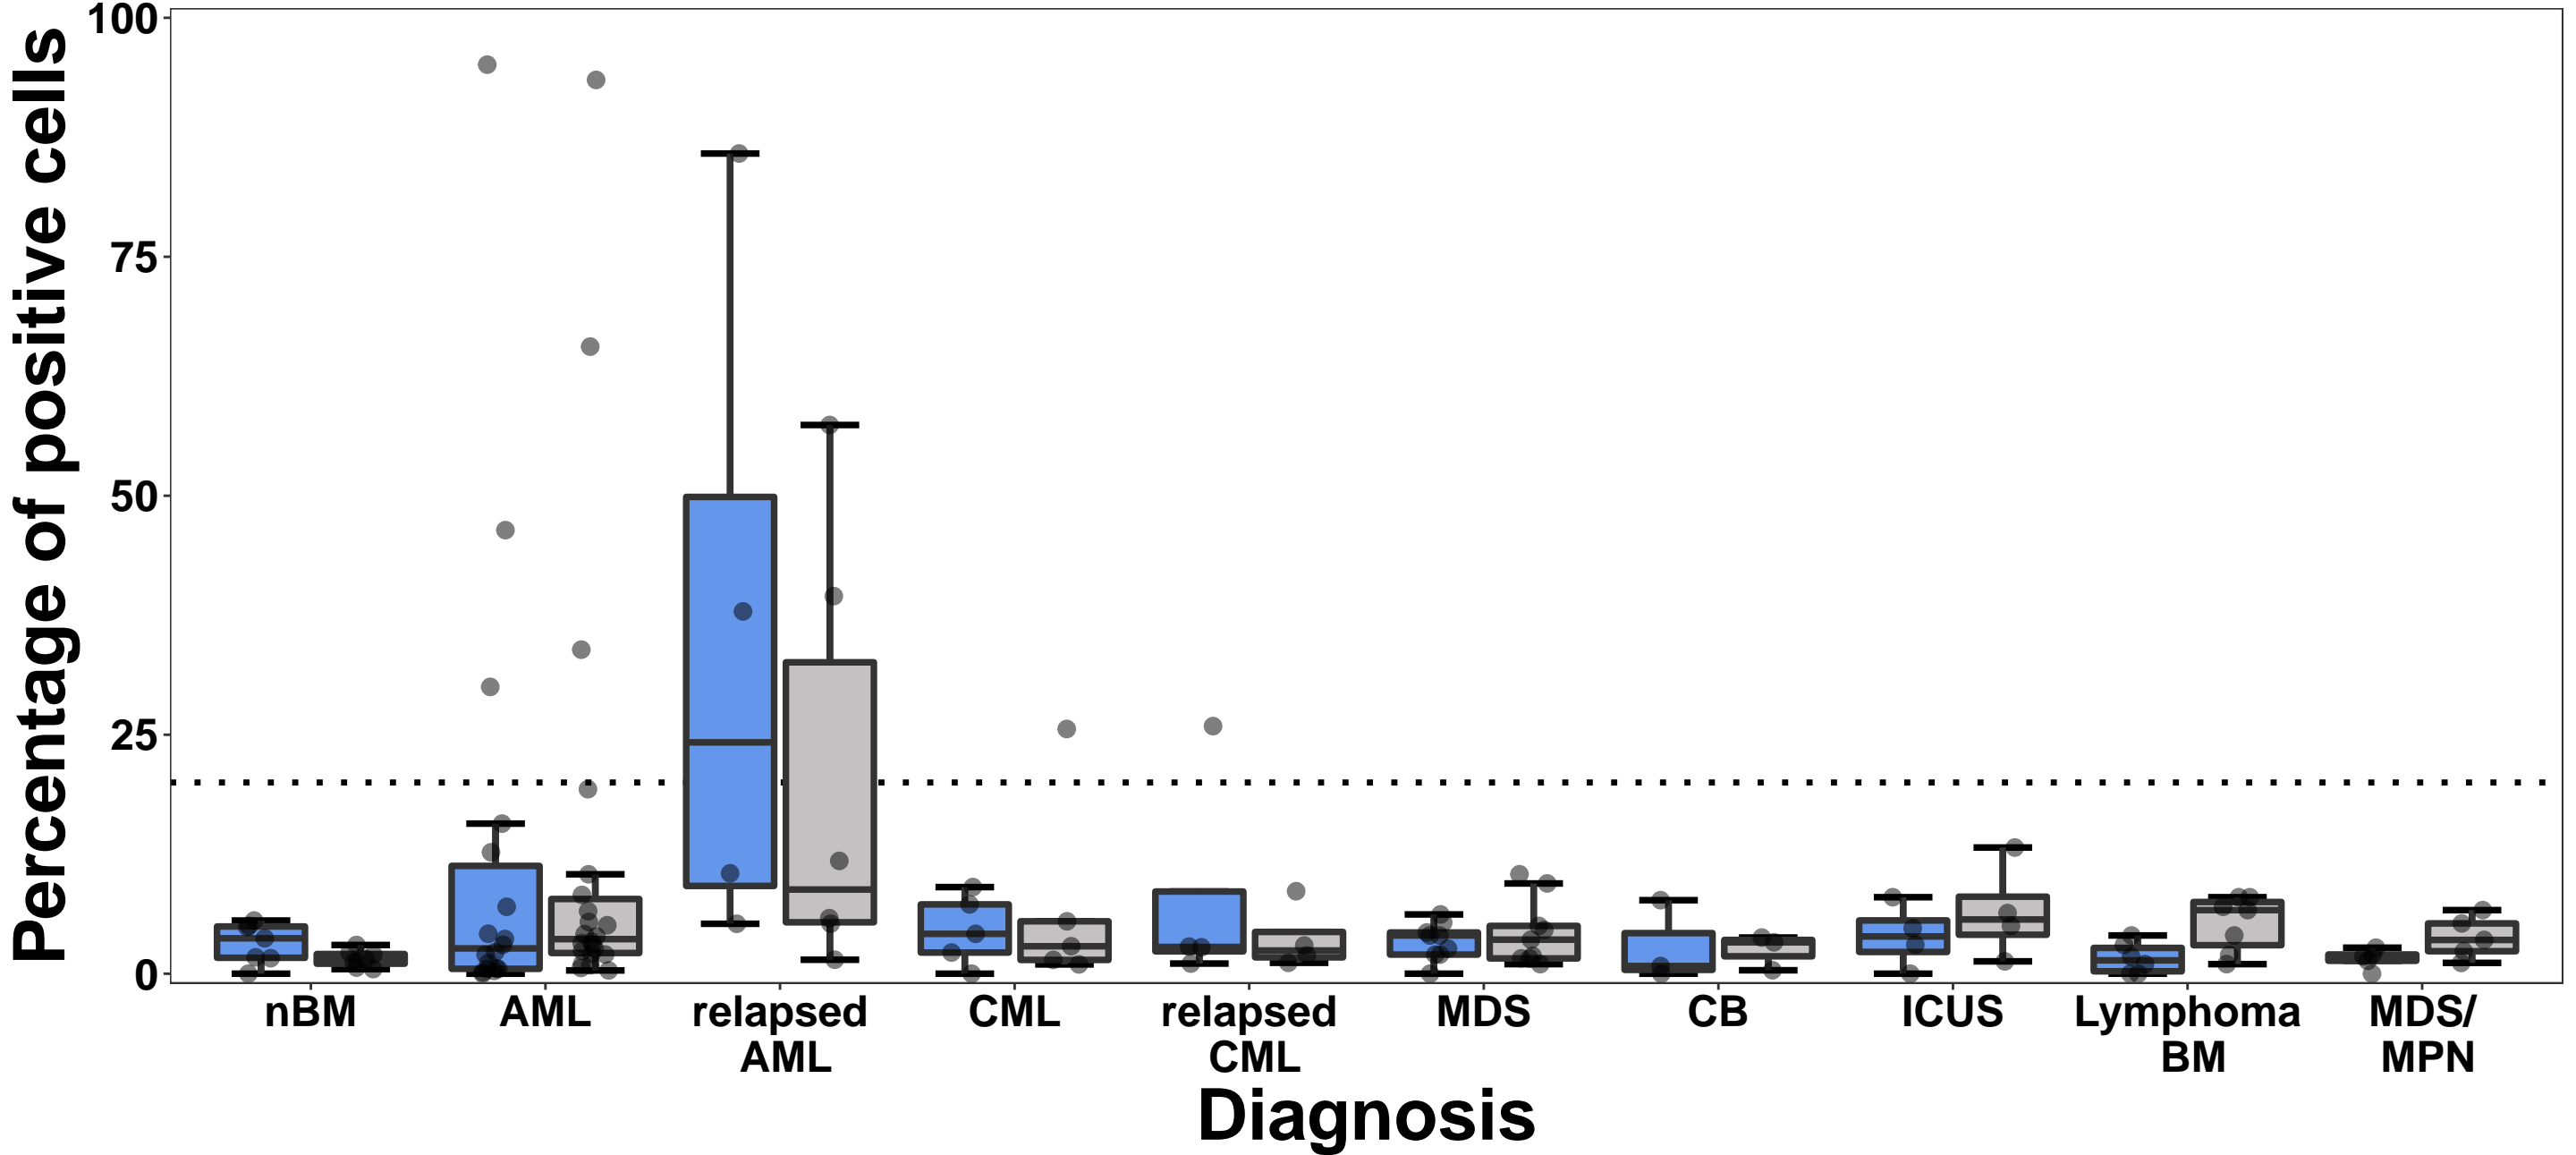

# CD116 staining index

Cell fraction  CD34+/CD38-  CD34+/CD38+

Staining index

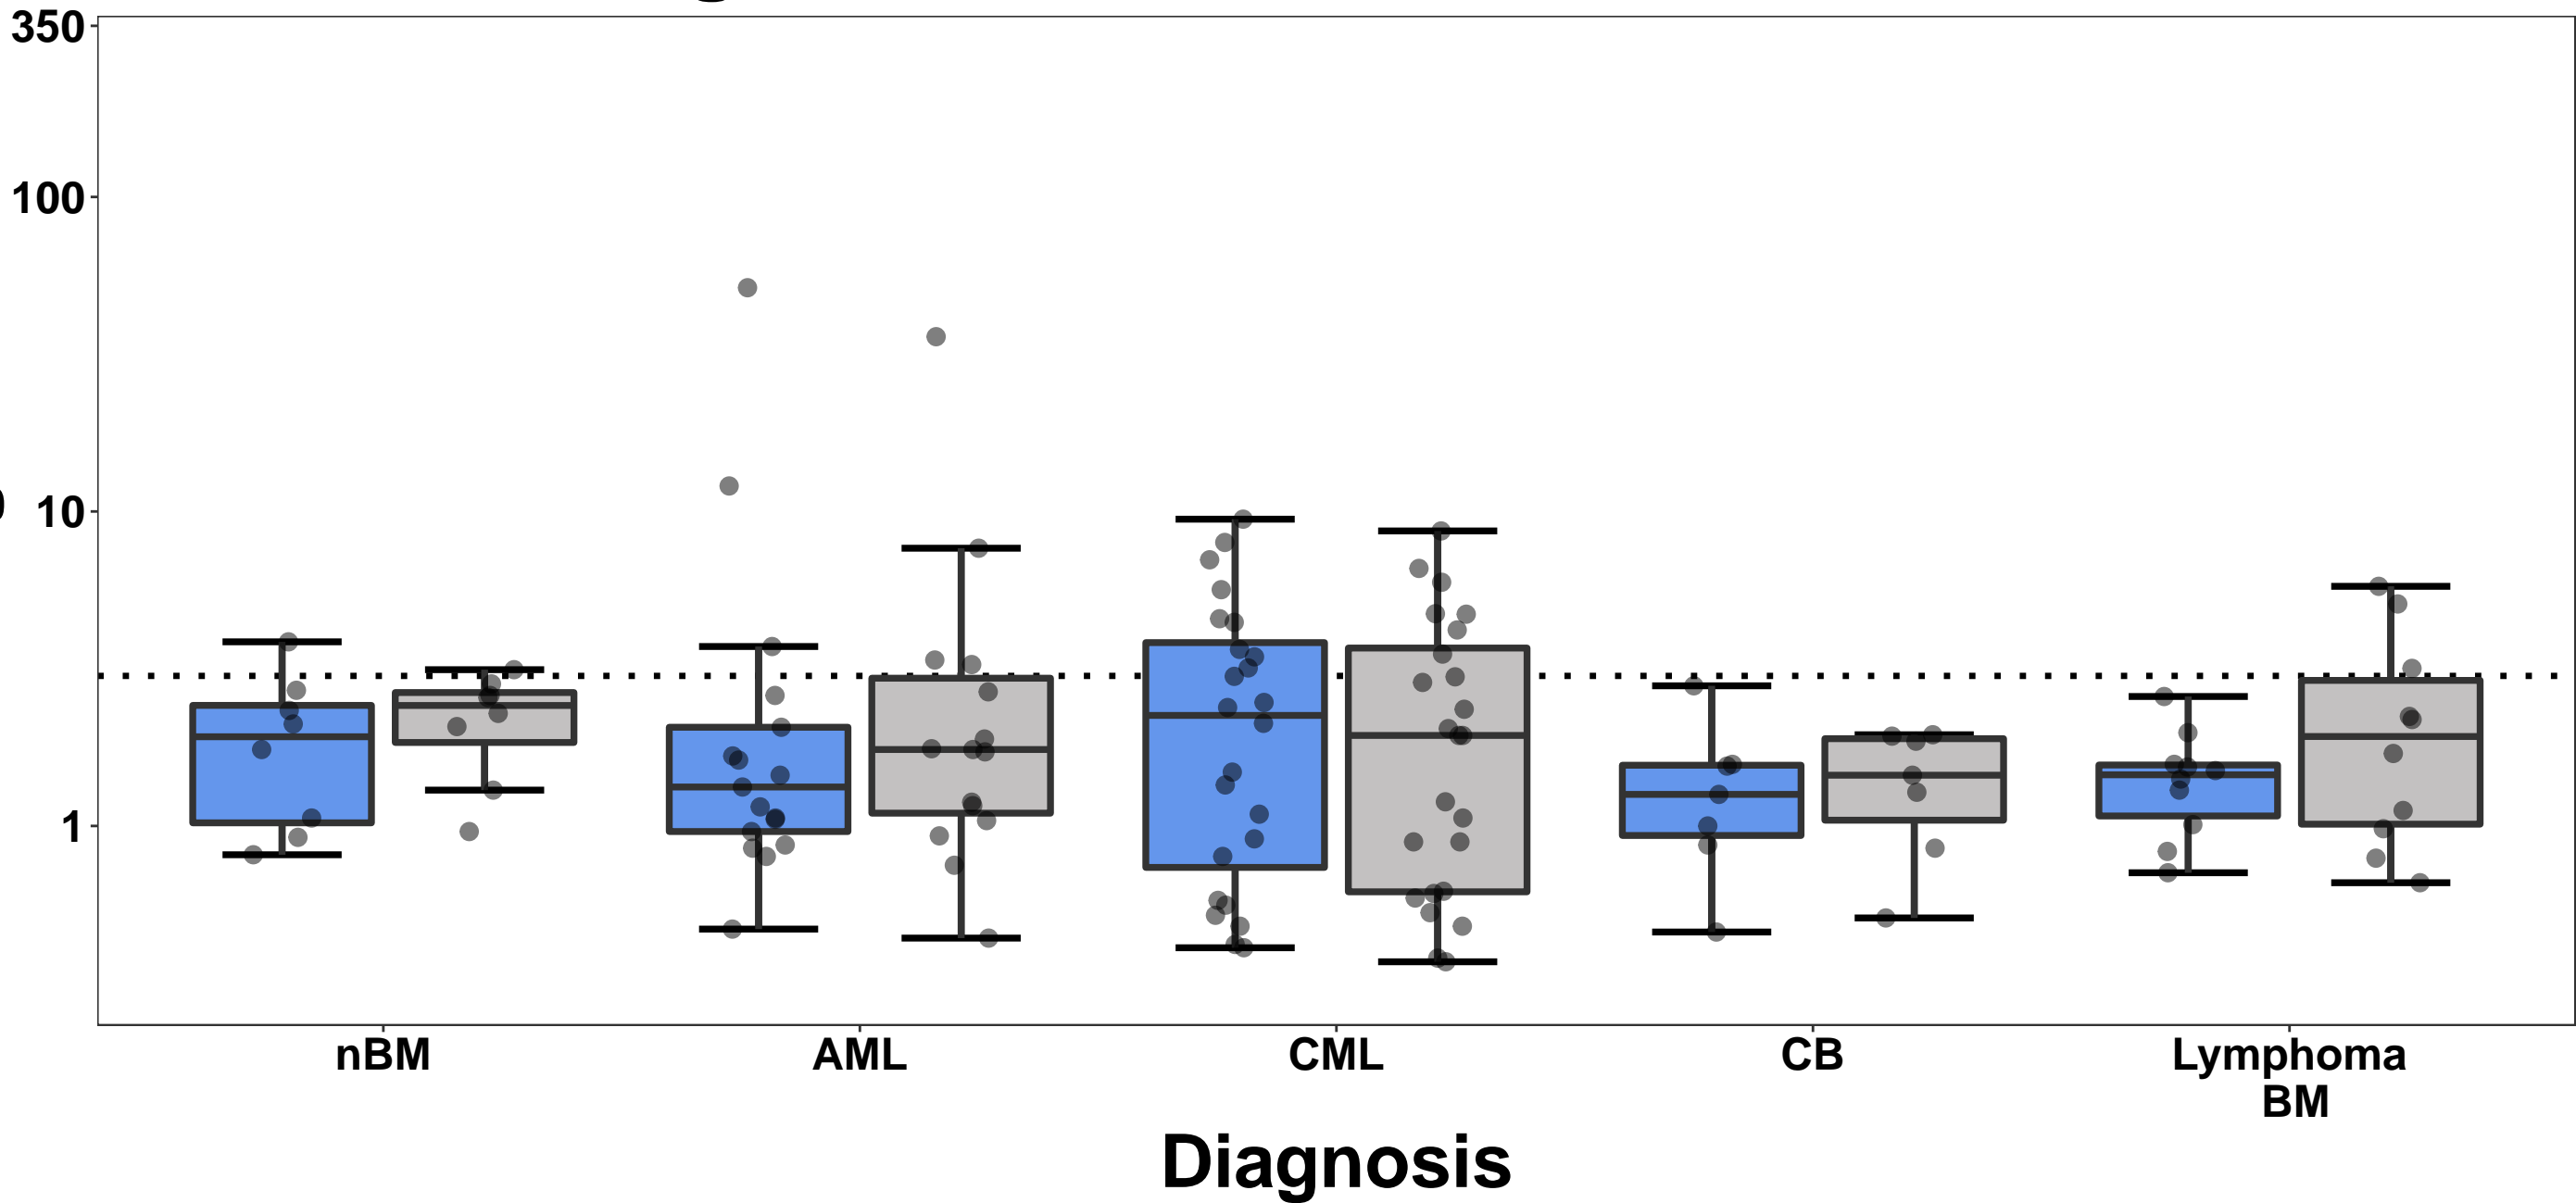

Cell fraction  CD34+/CD38-  CD34+/CD38+

# CD116 percentage

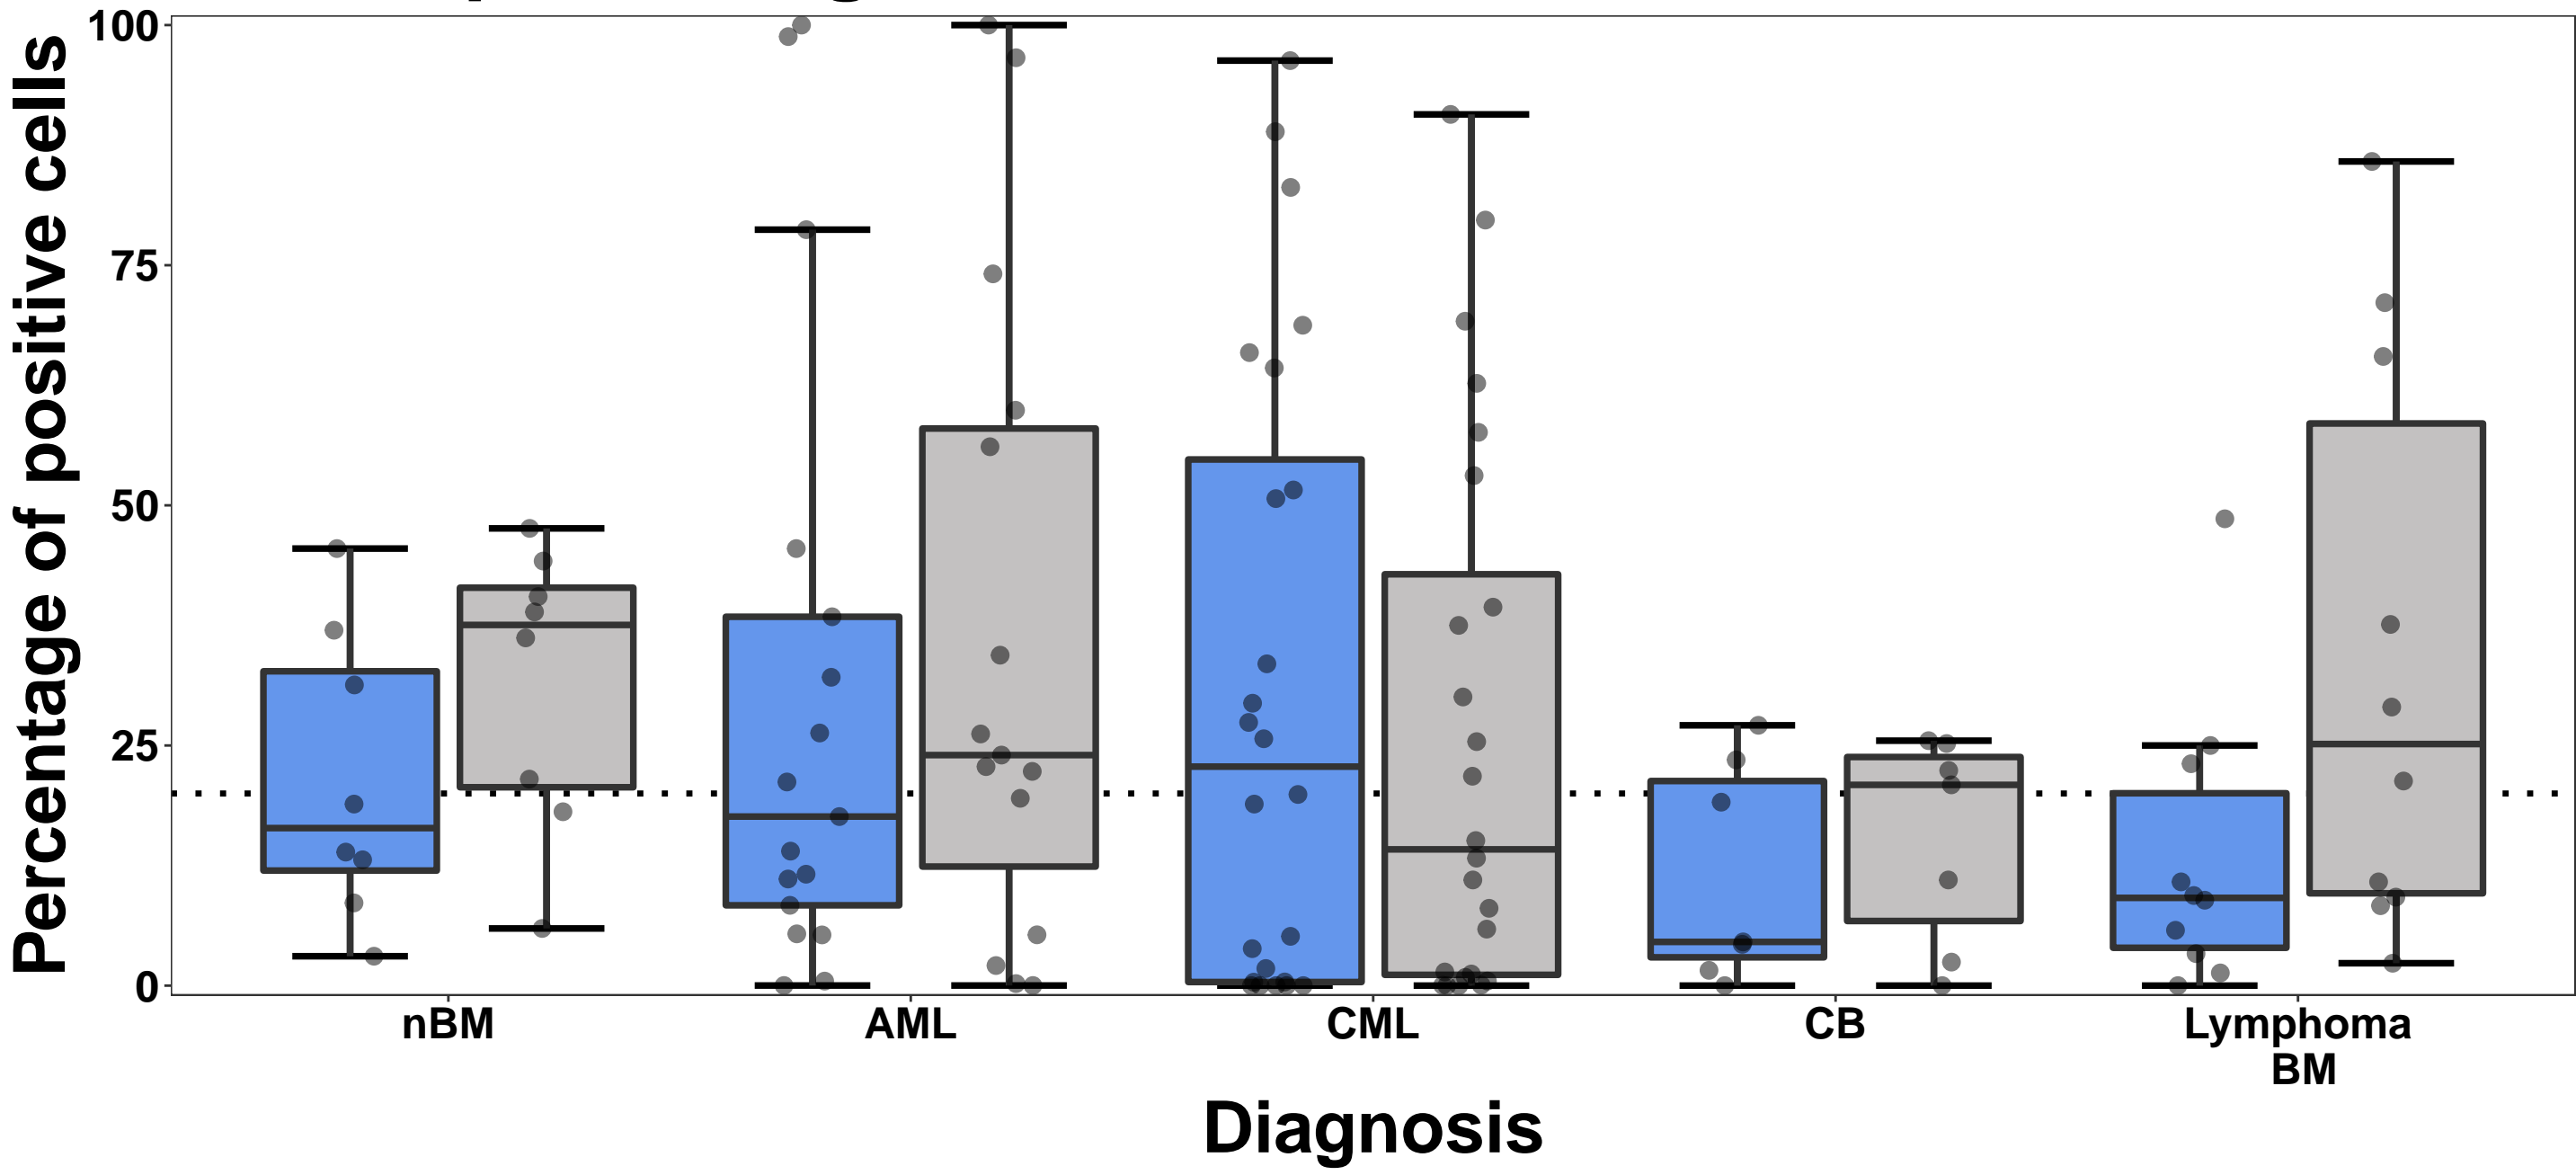

Cell fraction  CD34+/CD38-  CD34+/CD38+

# CD117 staining index

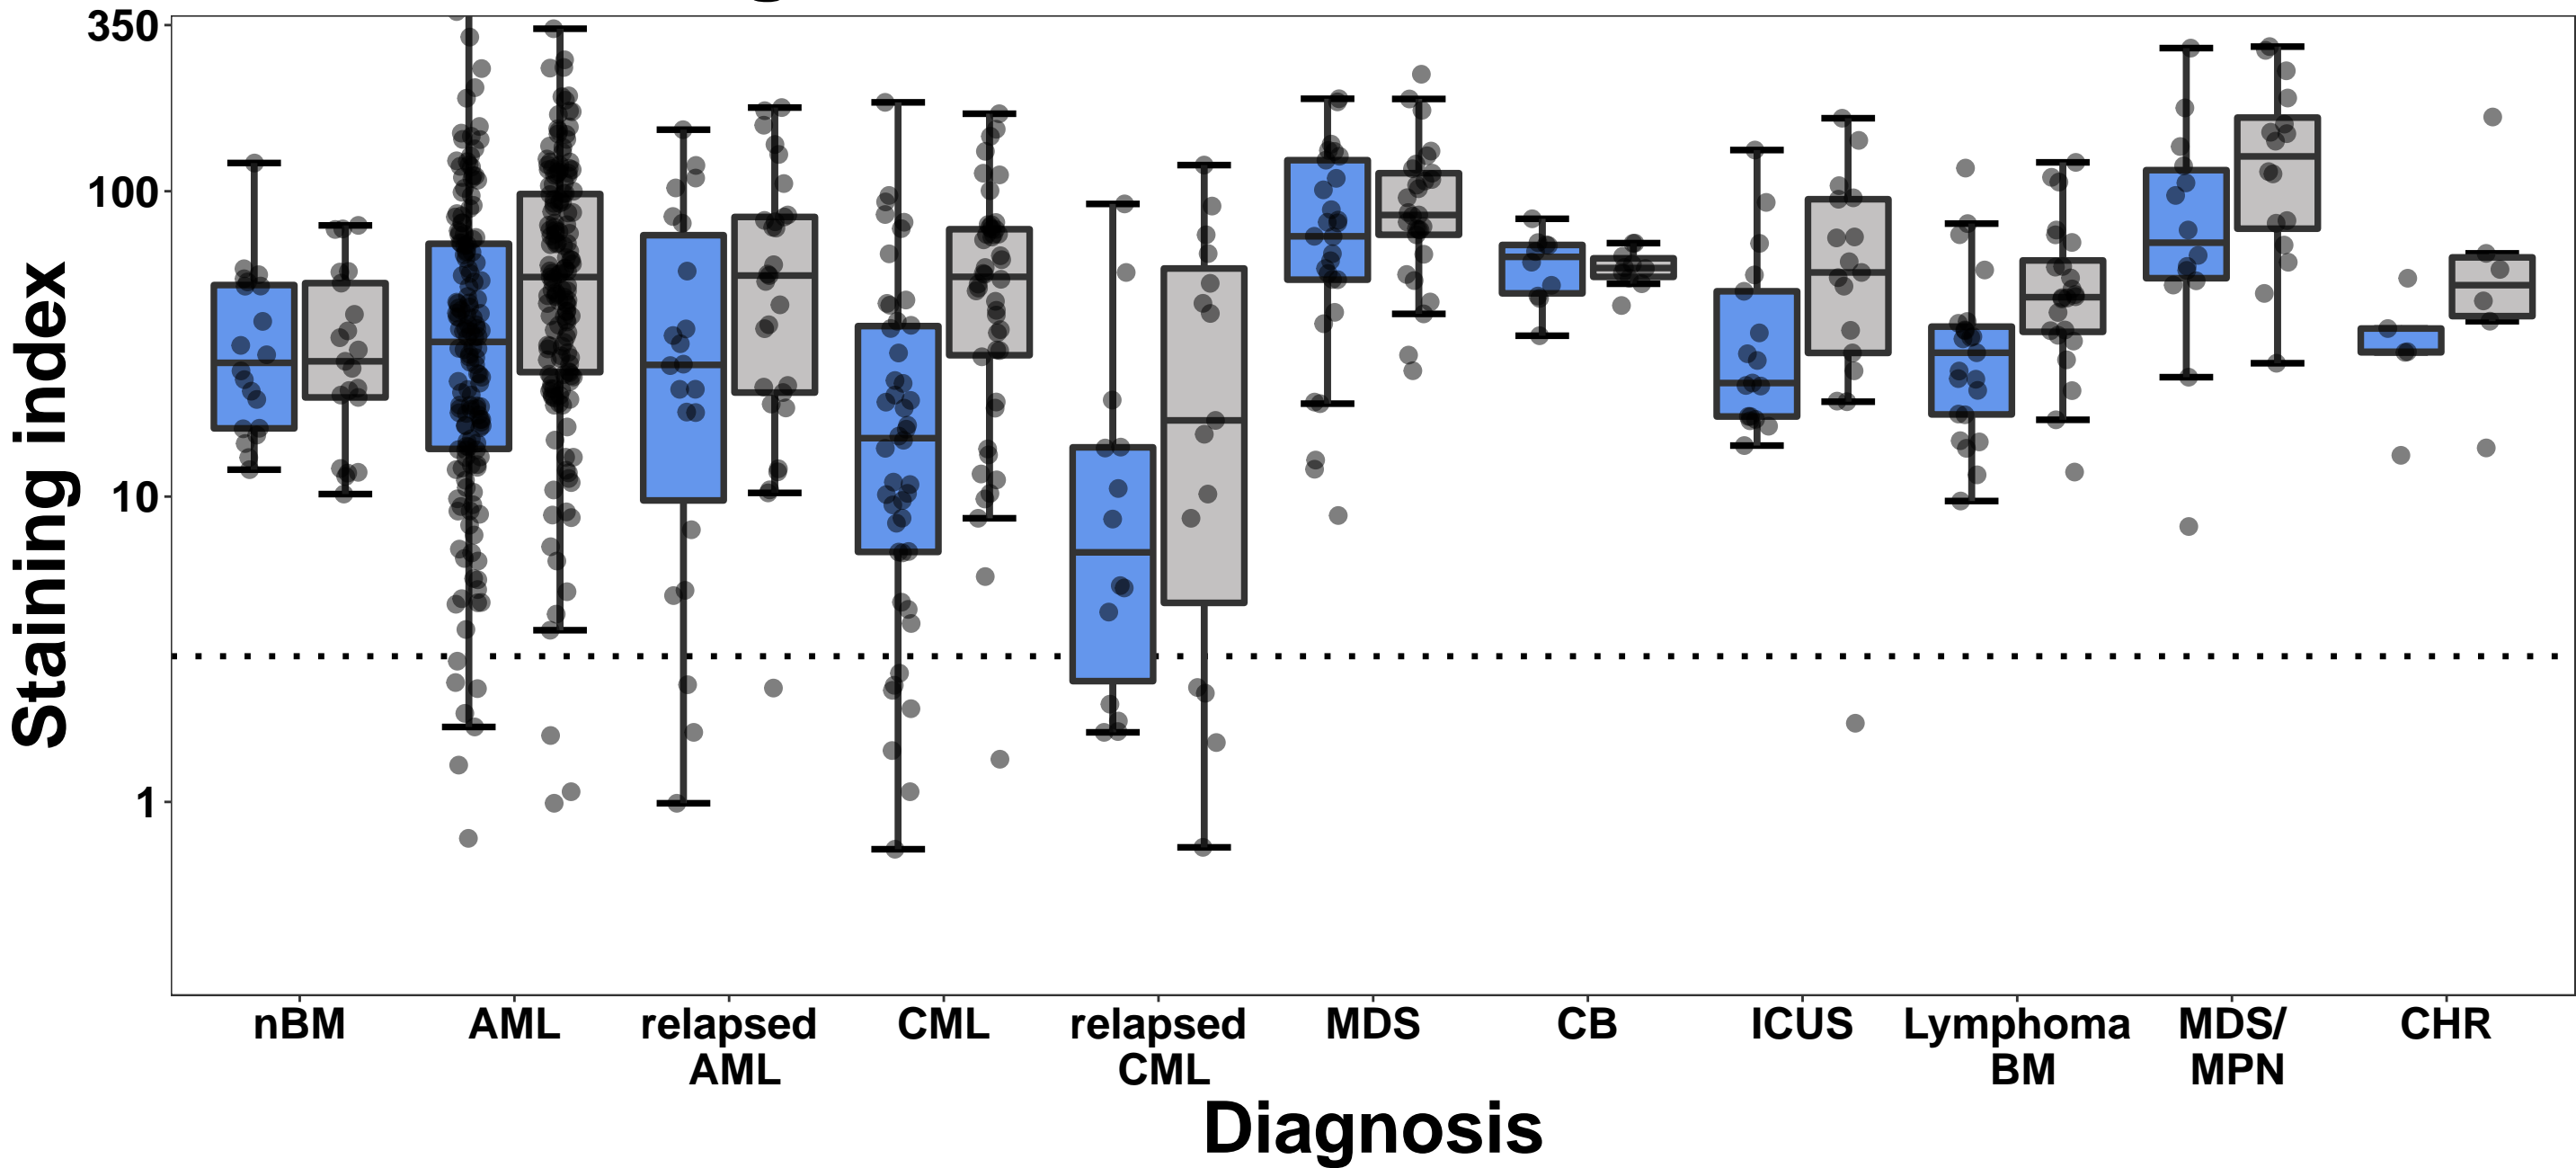

Cell fraction  CD34+/CD38-  CD34+/CD38+

# CD117 percentage

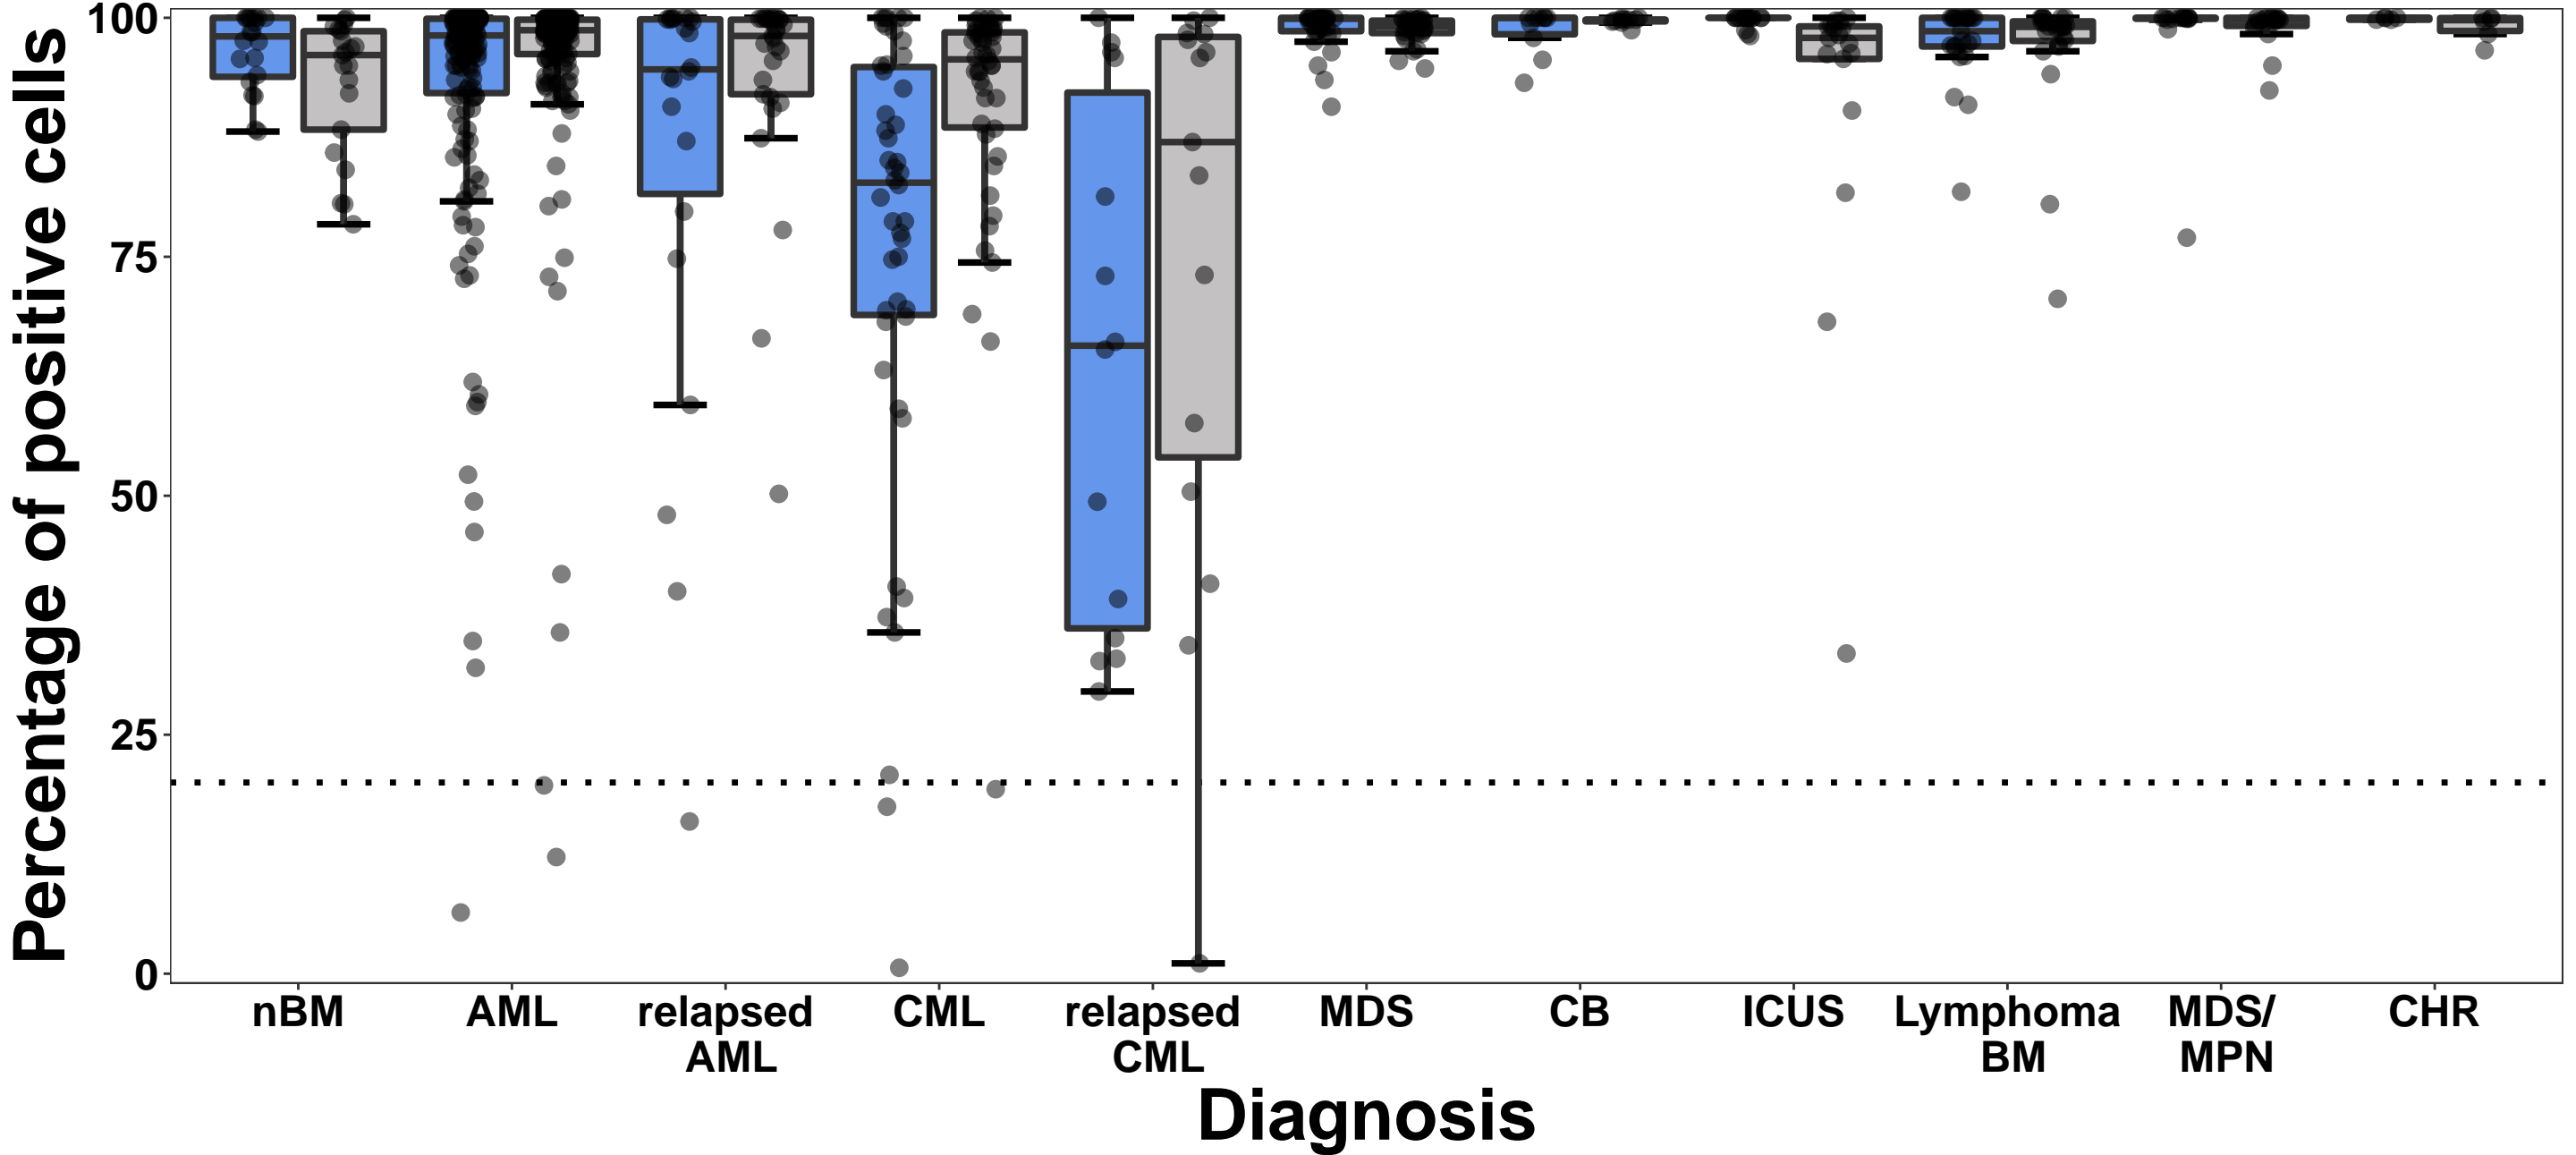

Cell fraction  CD34+/CD38-  CD34+/CD38+

# CD122 staining index

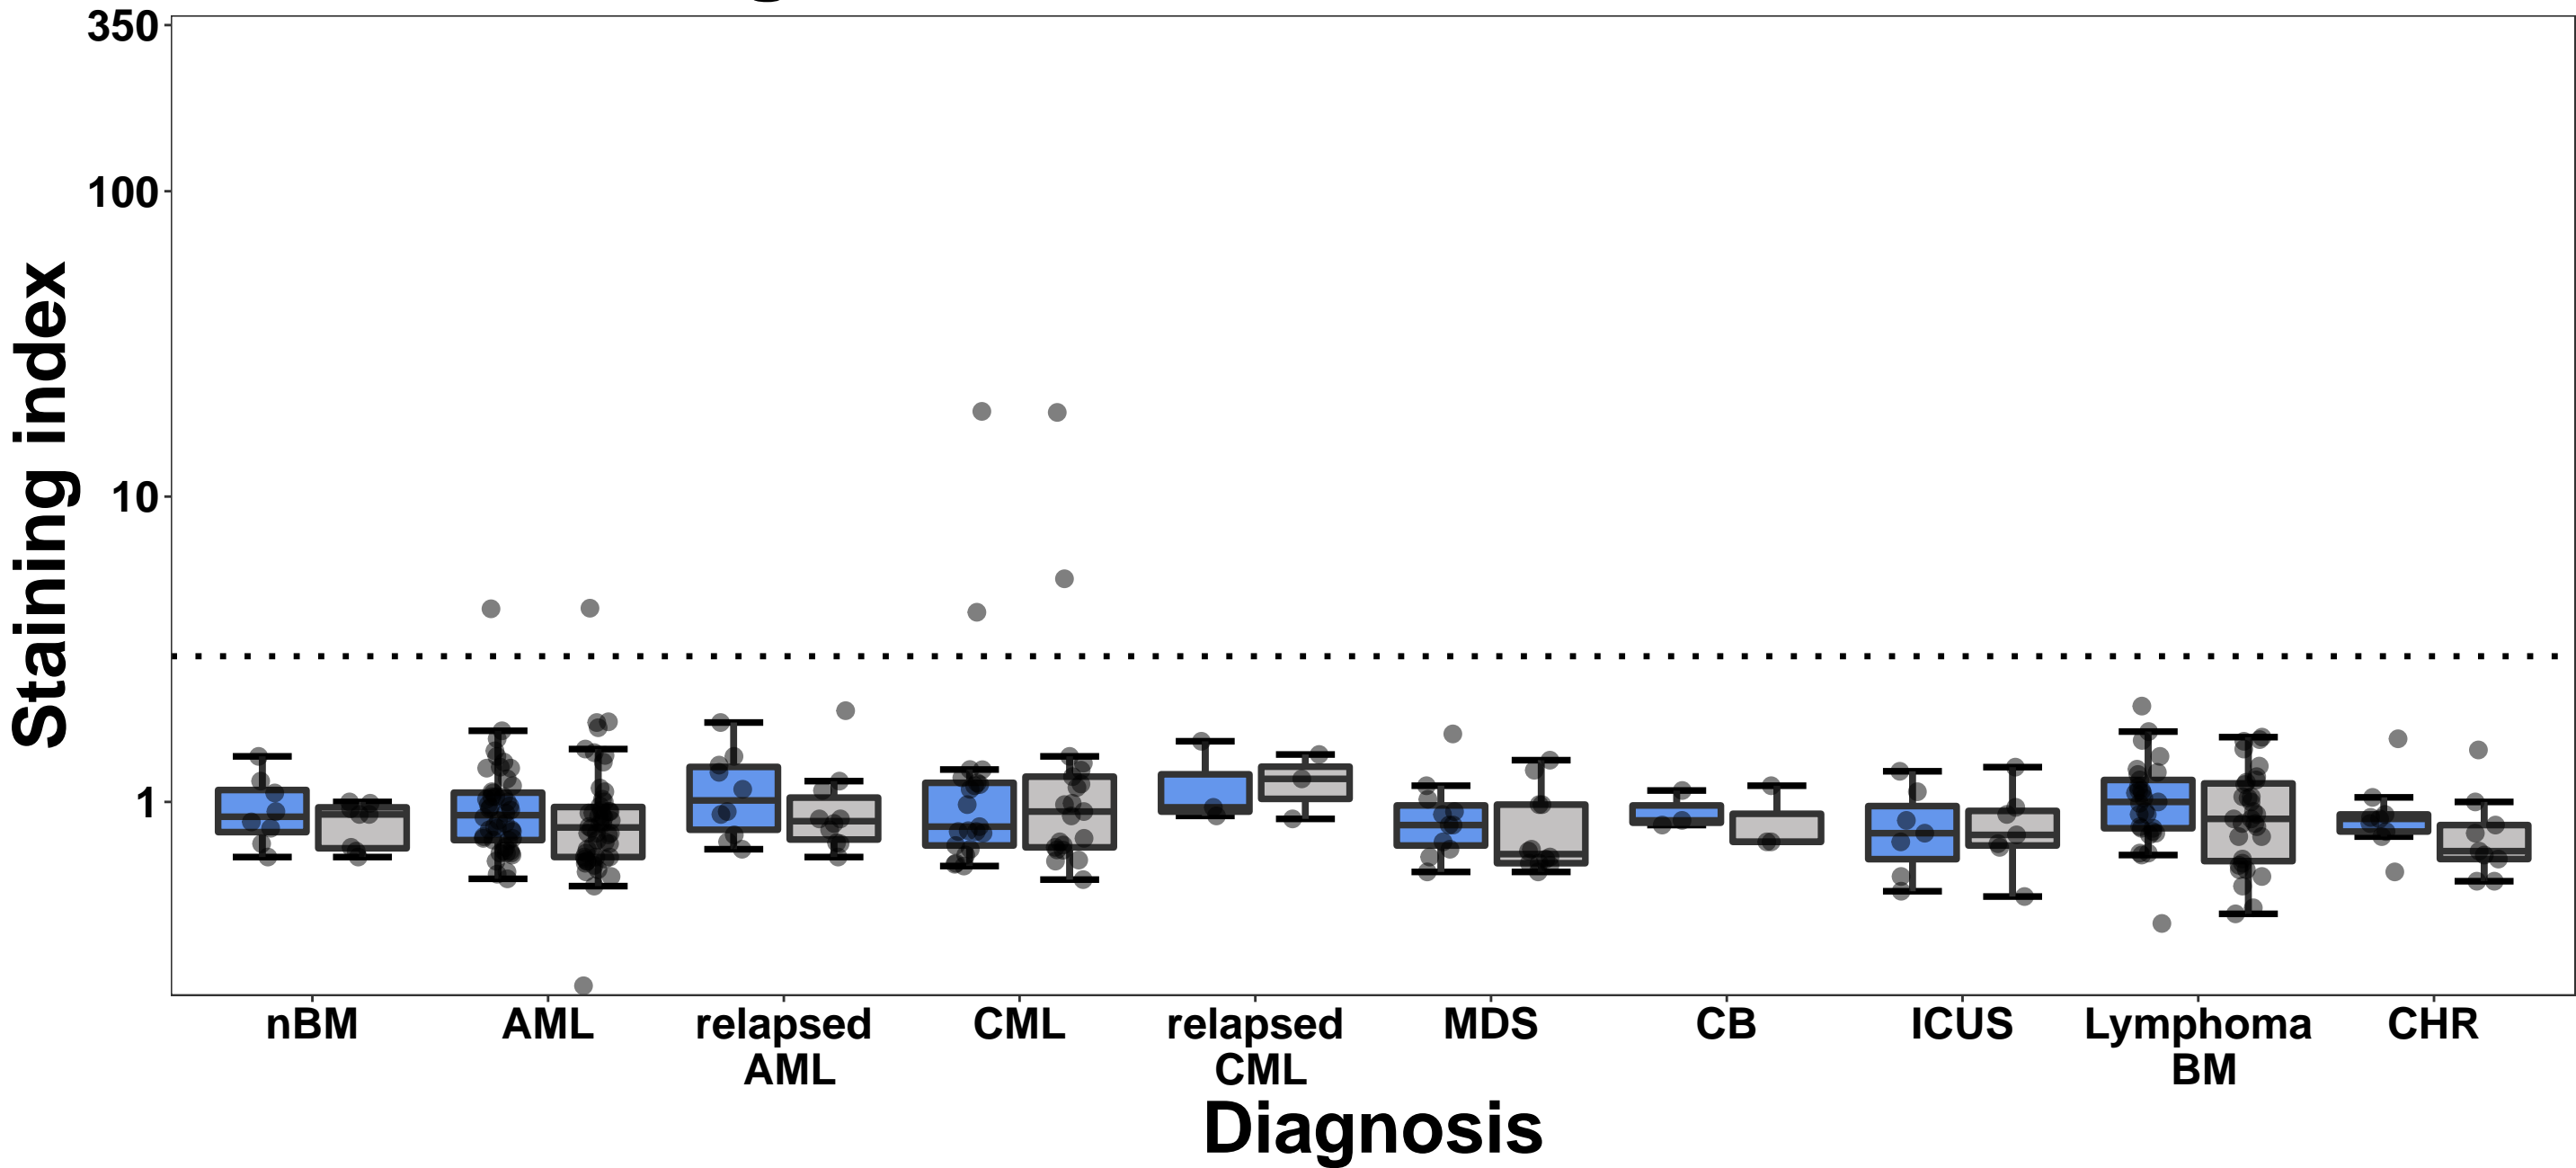

Cell fraction  CD34+/CD38-  CD34+/CD38+

# CD122 percentage

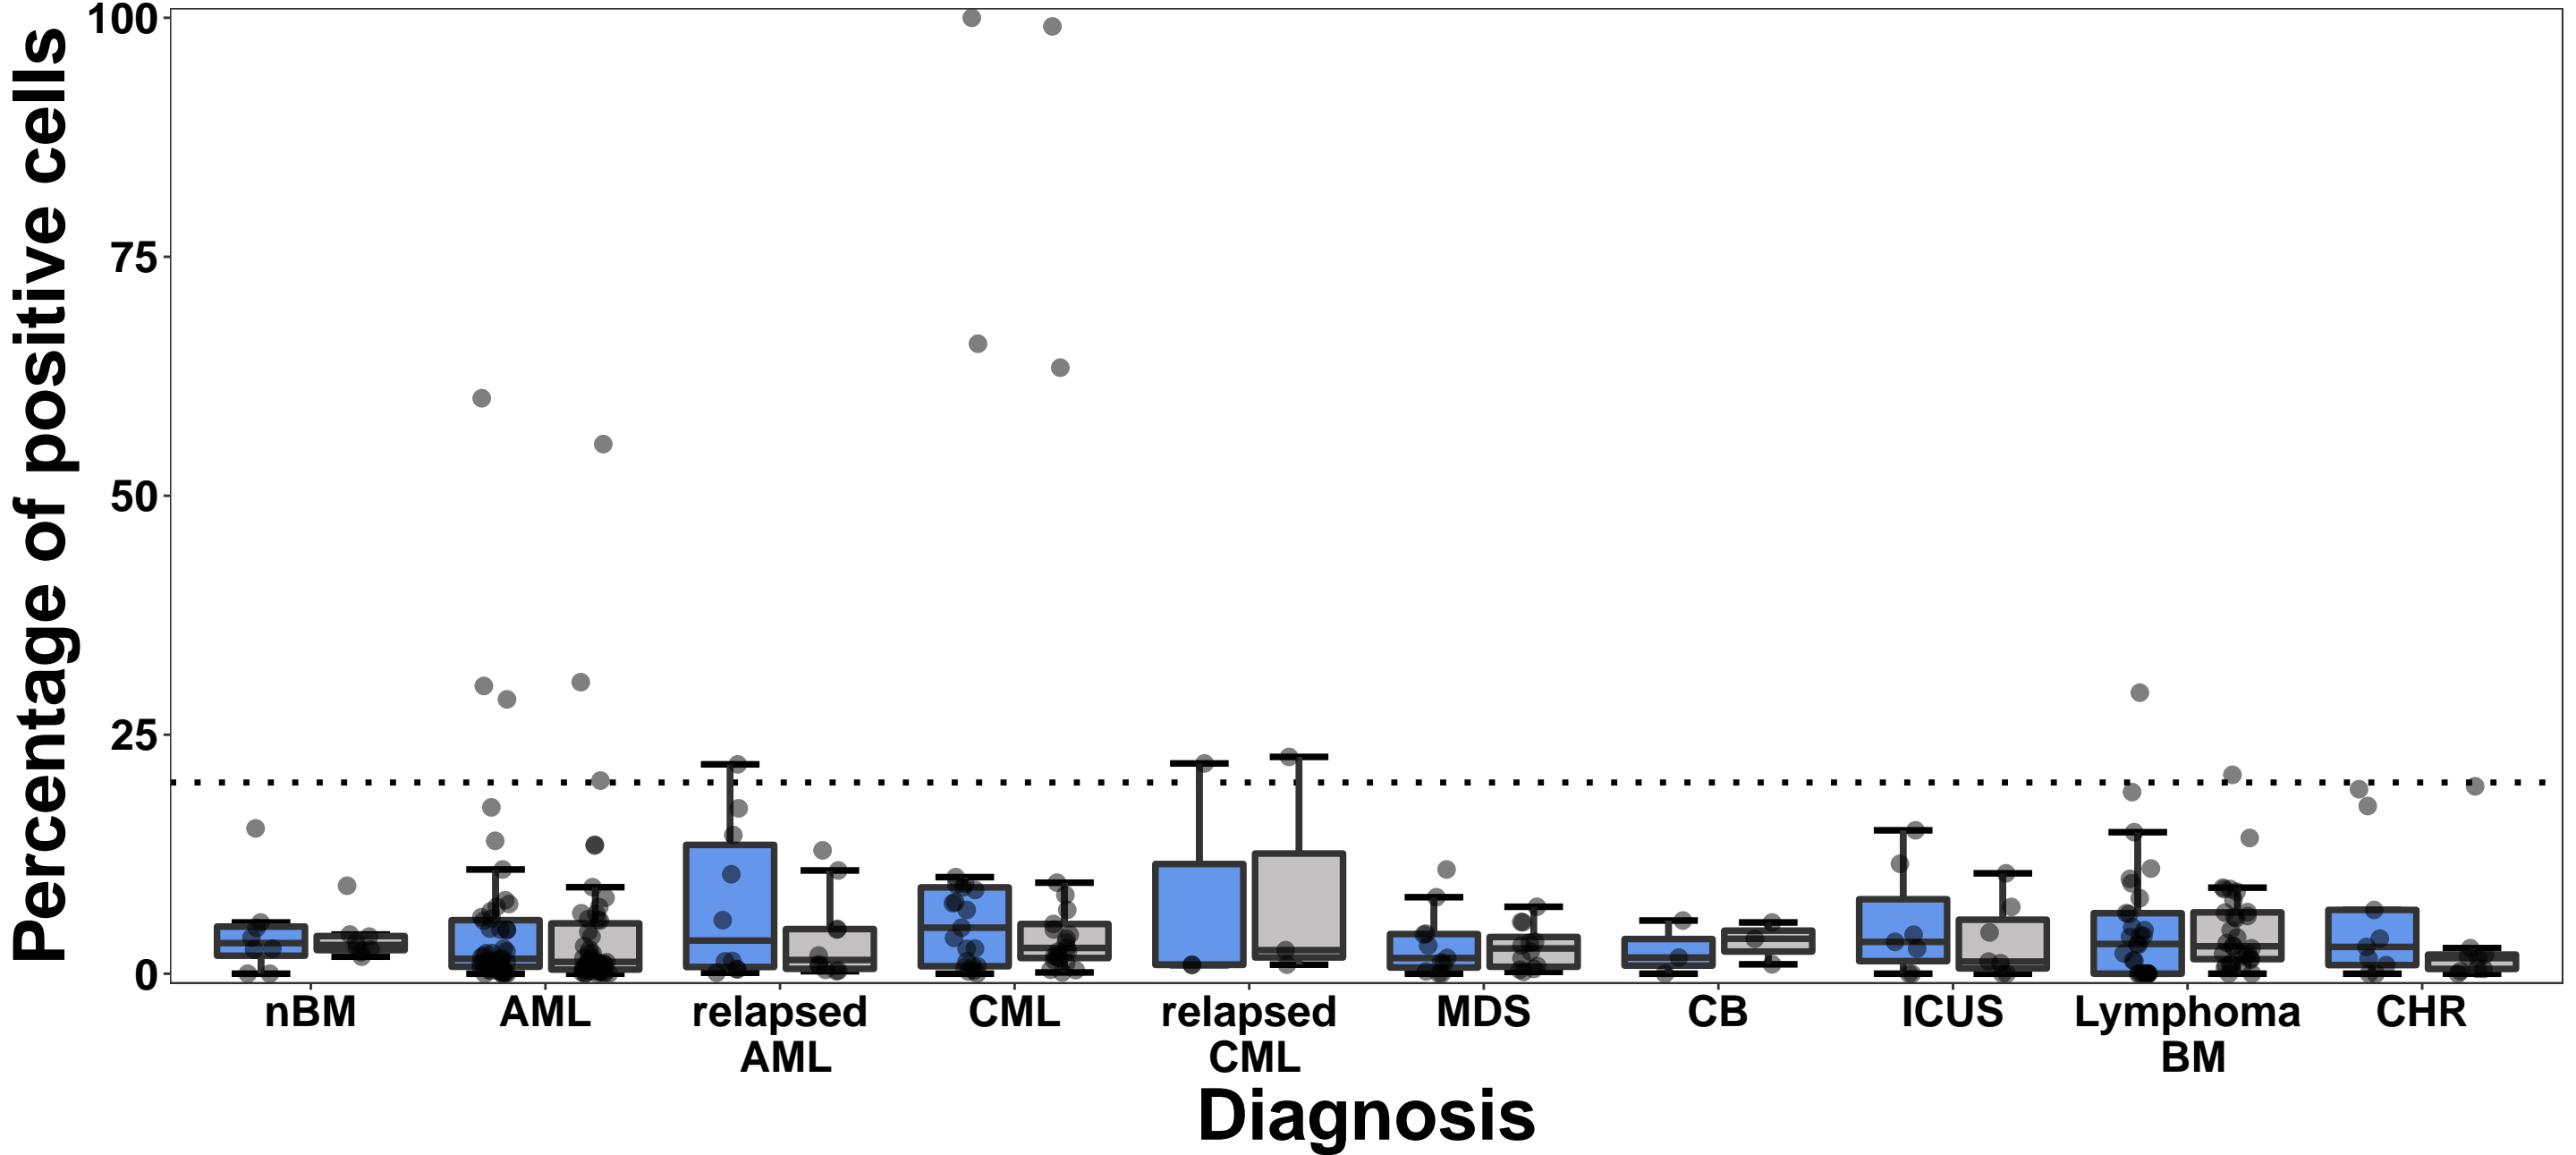

Cell fraction  CD34+/CD38-  CD34+/CD38+

# CD123 staining index

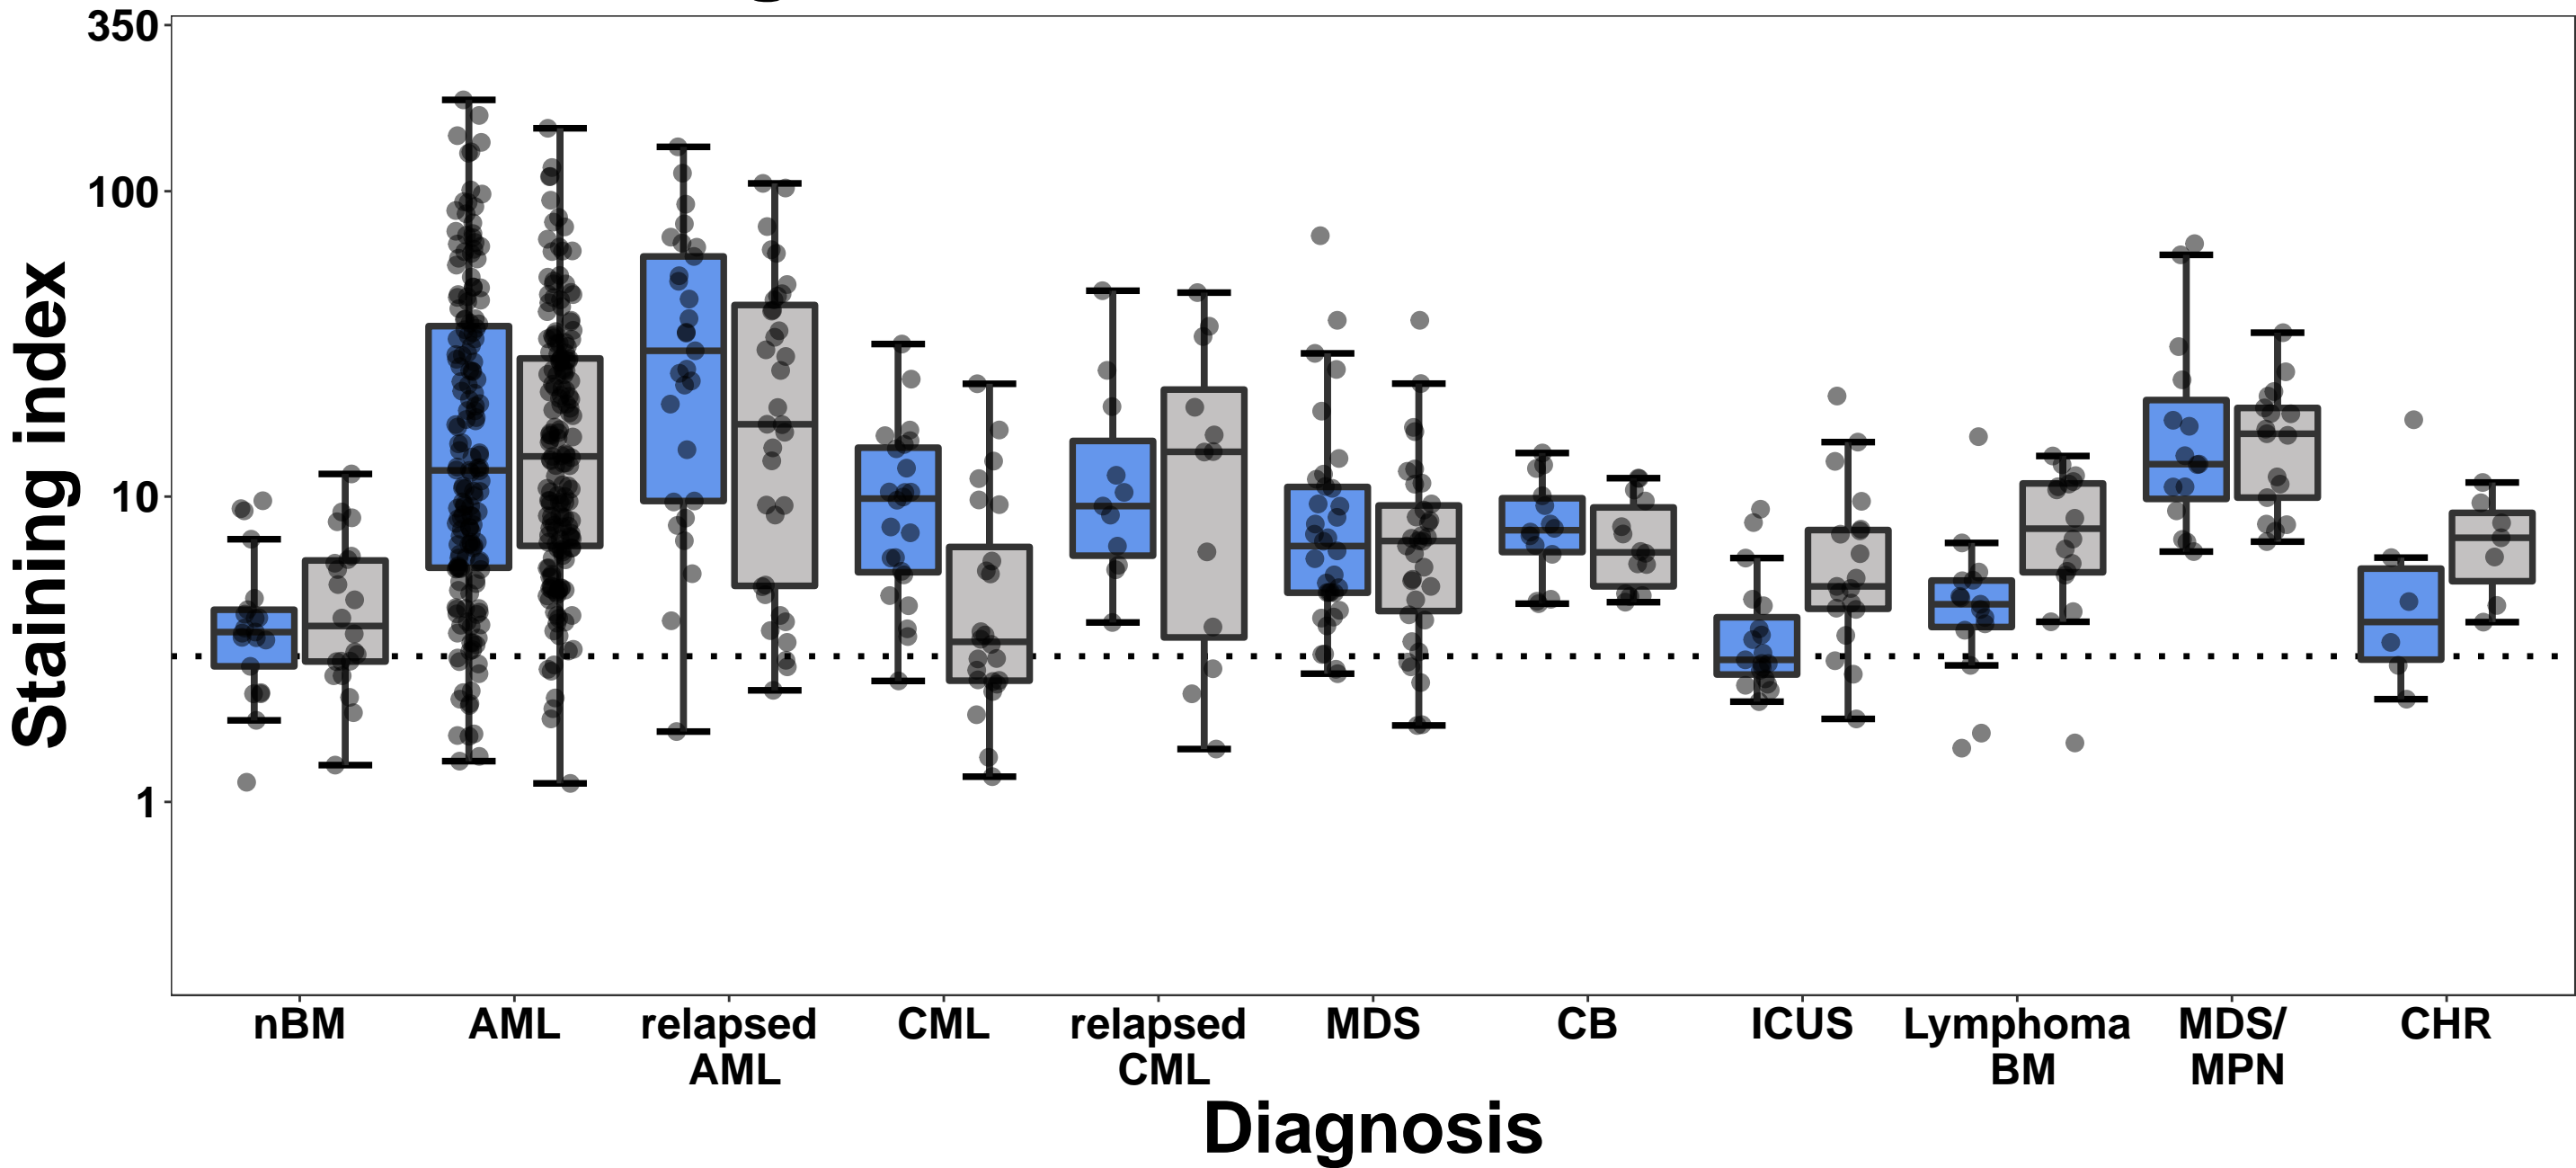



Cell fraction  CD34+/CD38-  CD34+/CD38+

# CD123 percentage

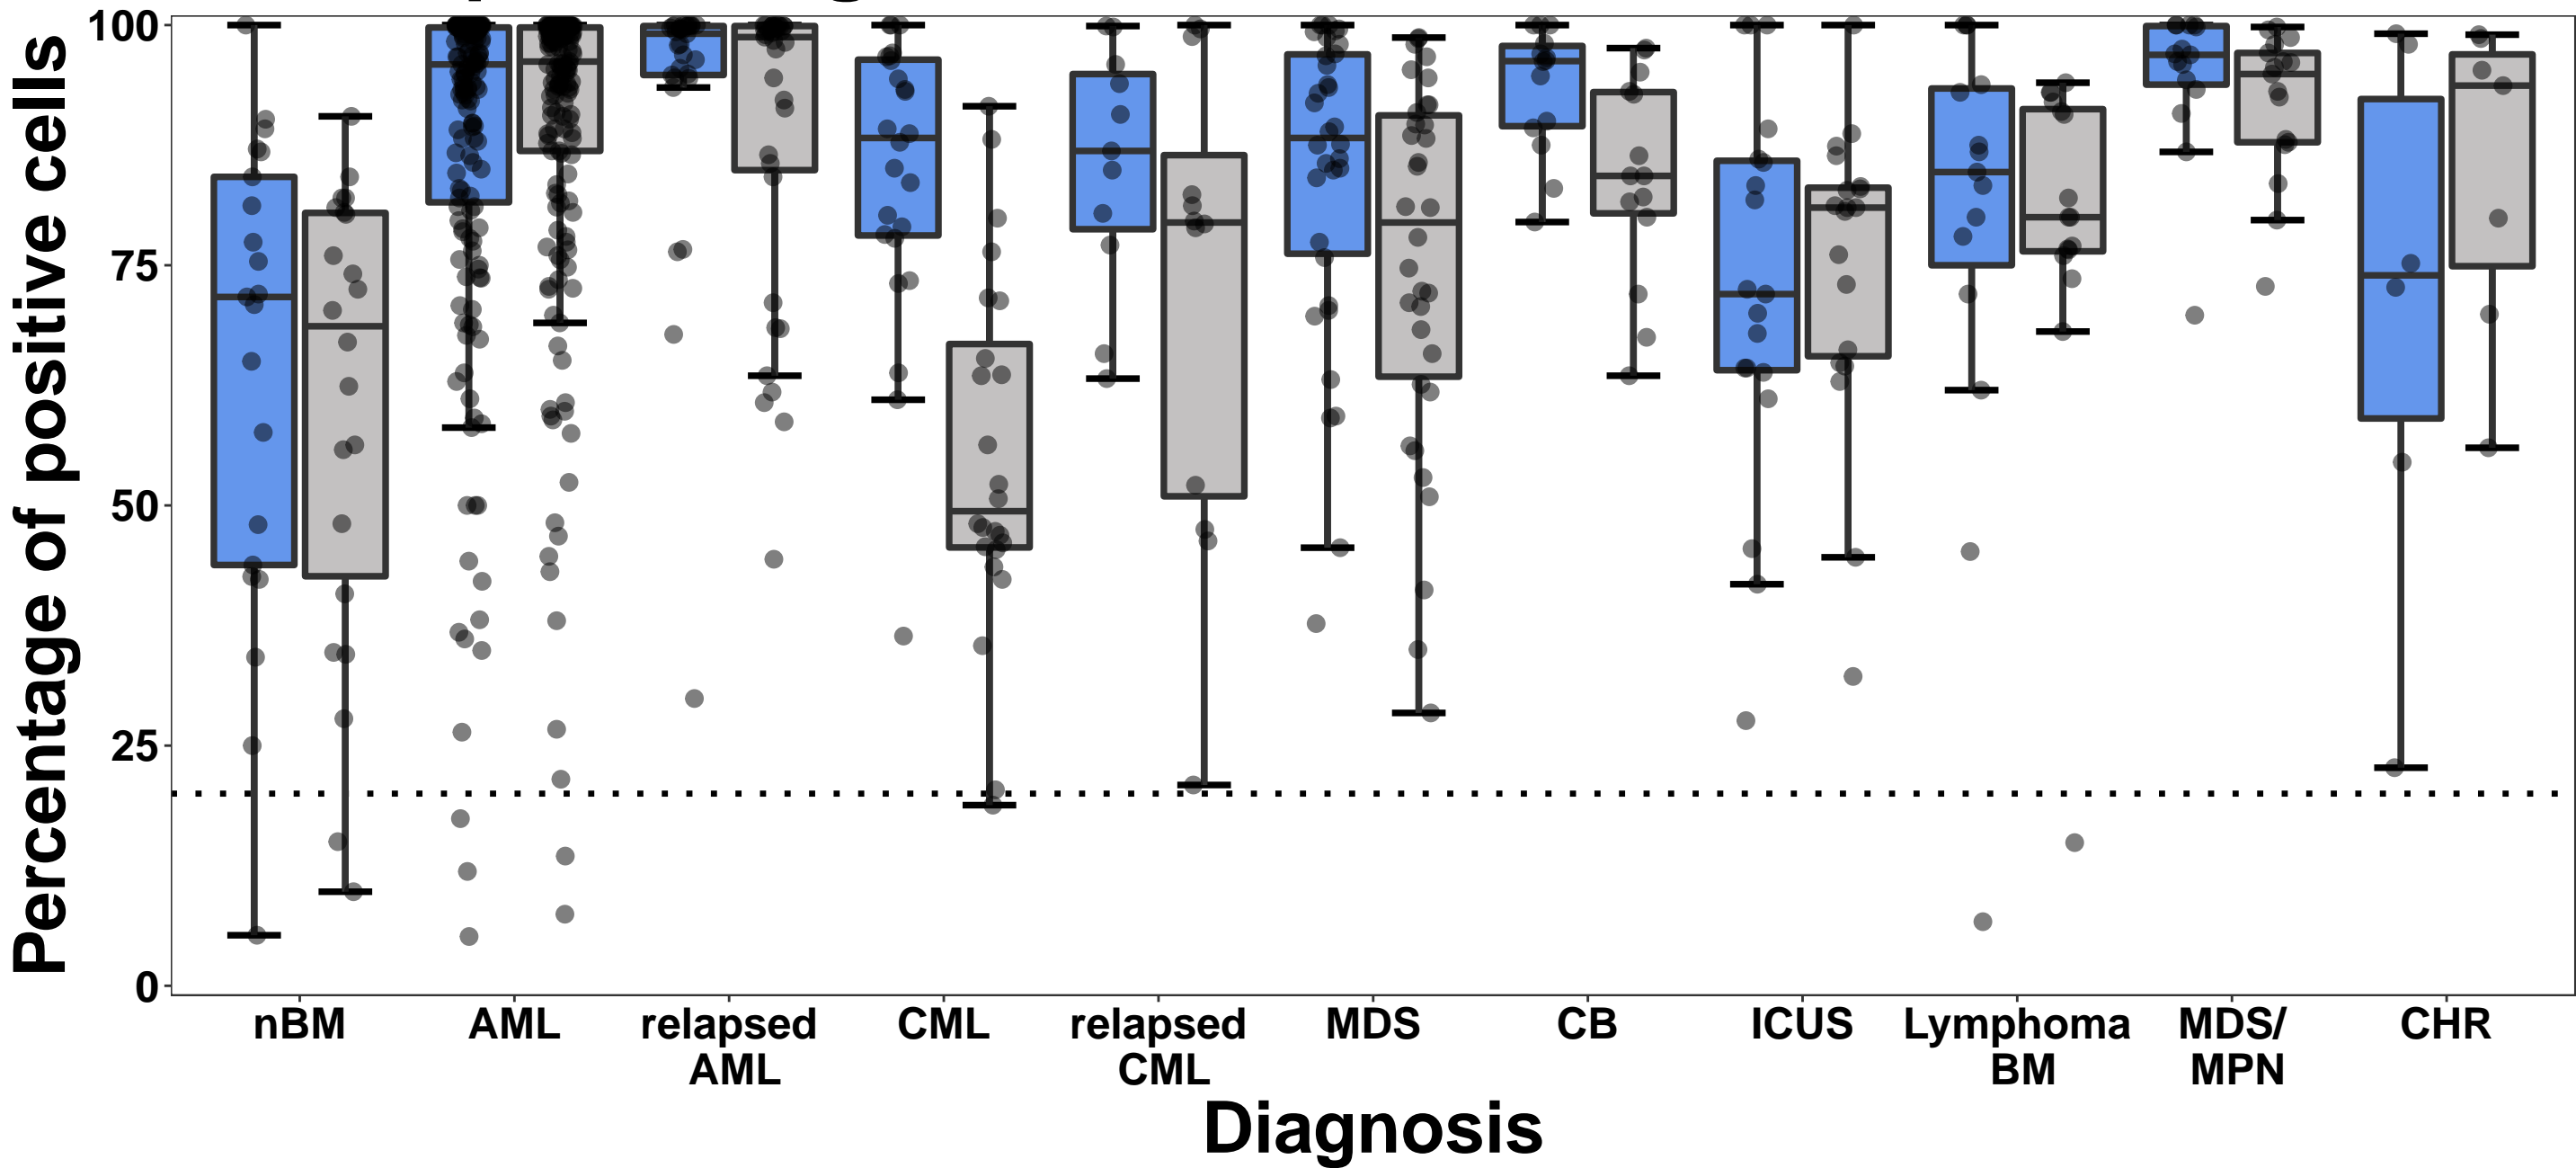

# CD129 staining index

Cell fraction  CD34+/CD38-  CD34+/CD38+

Staining index

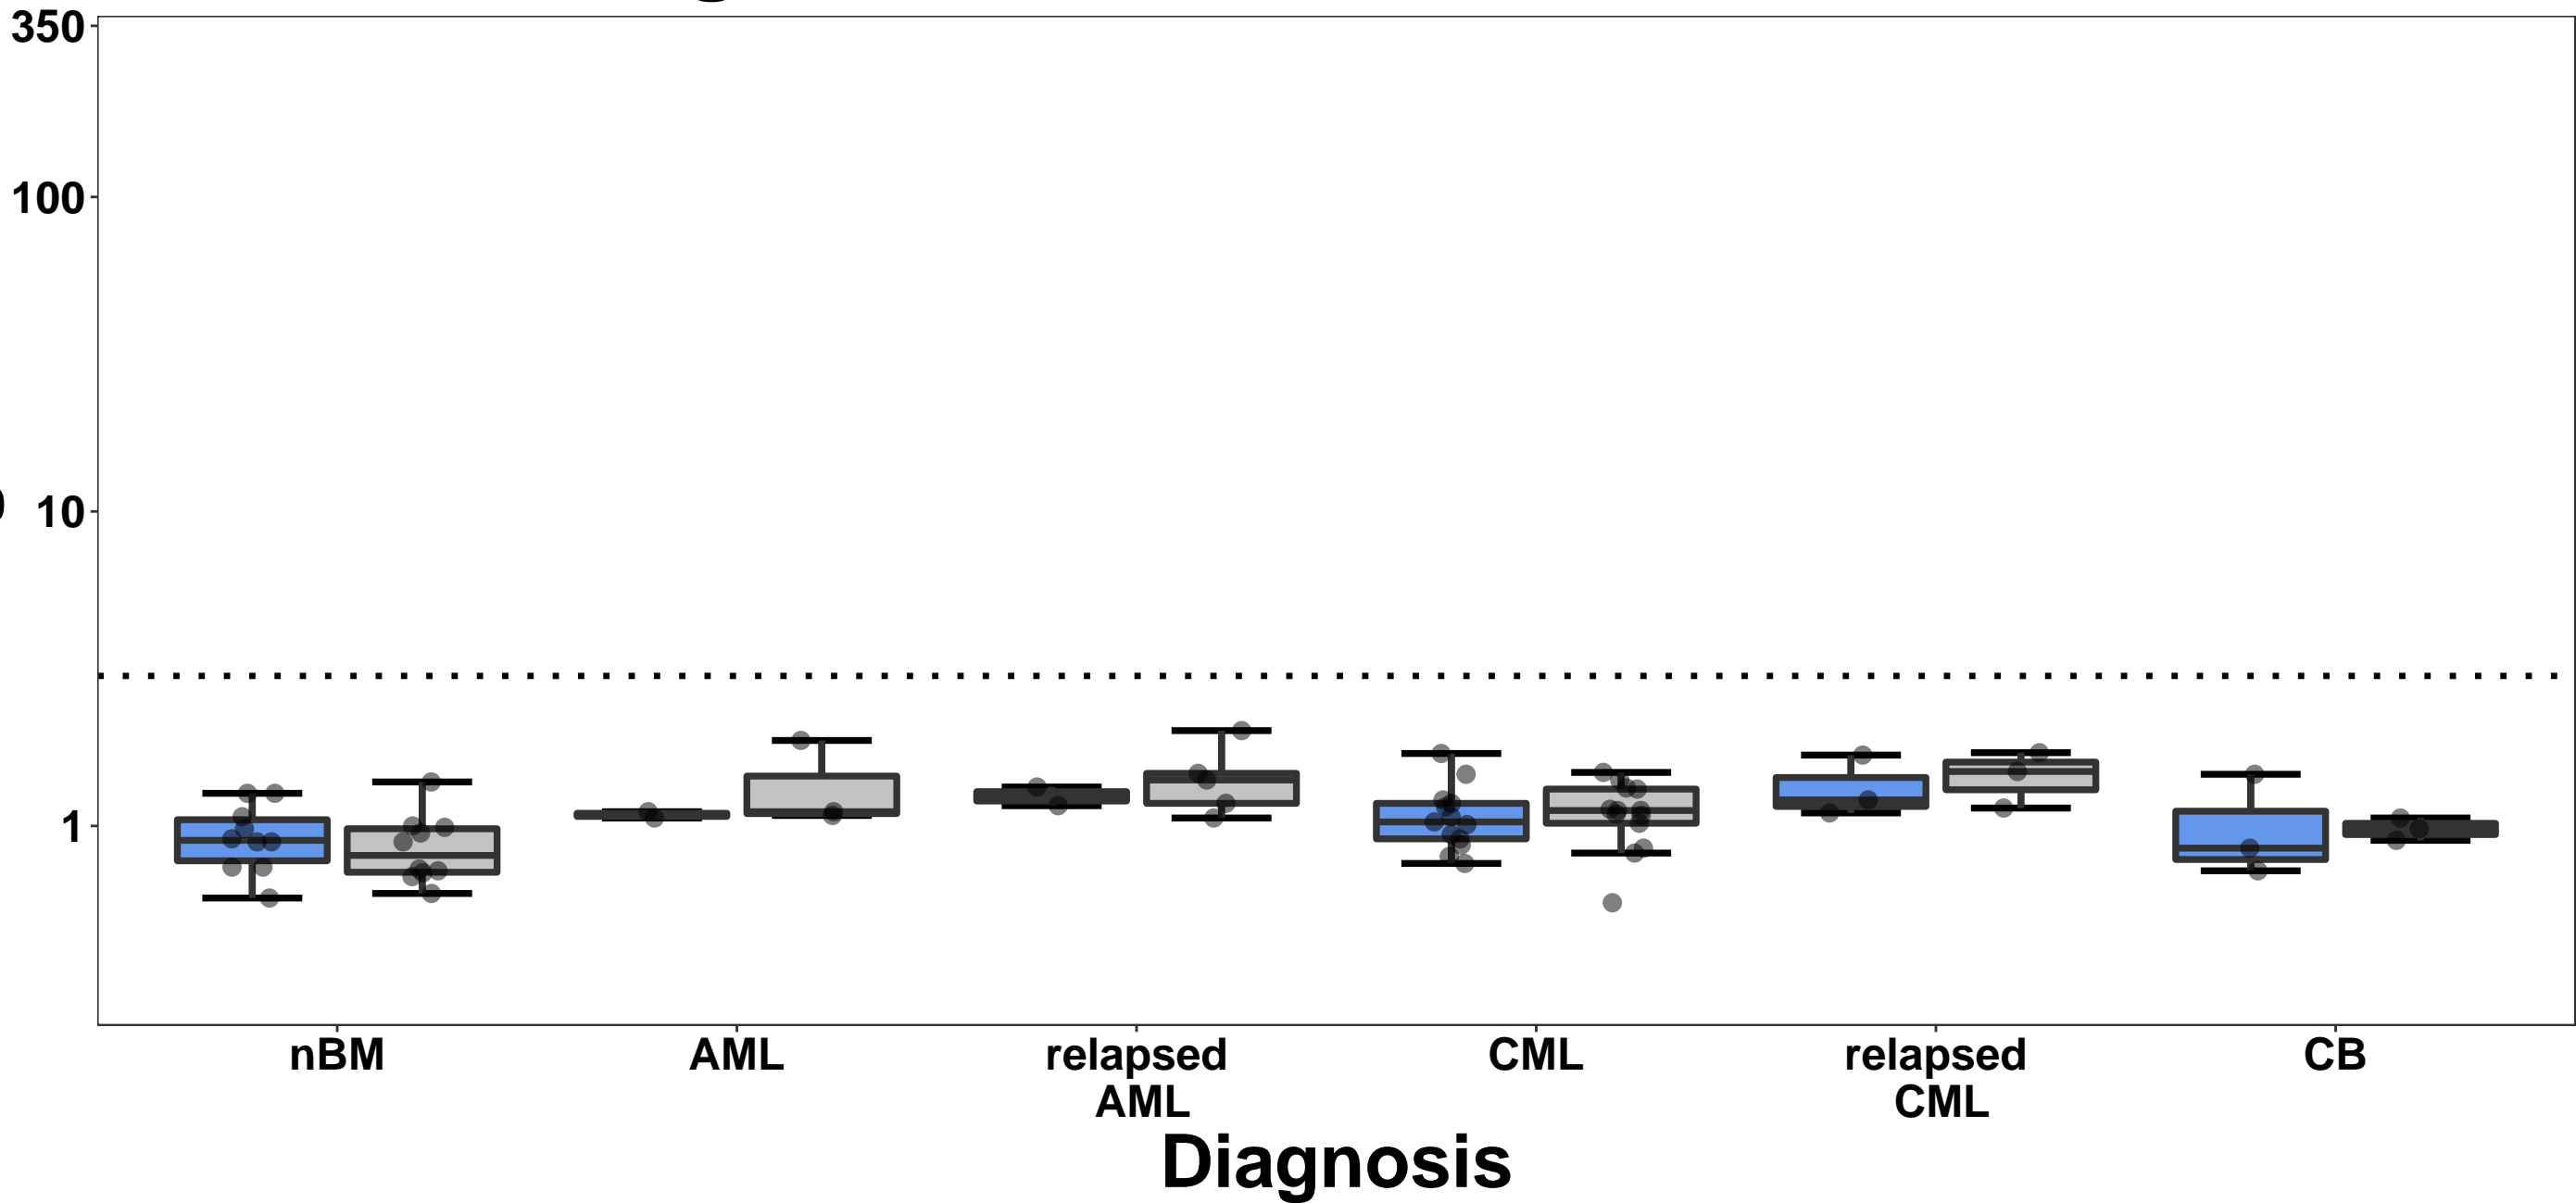

Cell fraction  CD34+/CD38-  CD34+/CD38+

# CD129 percentage

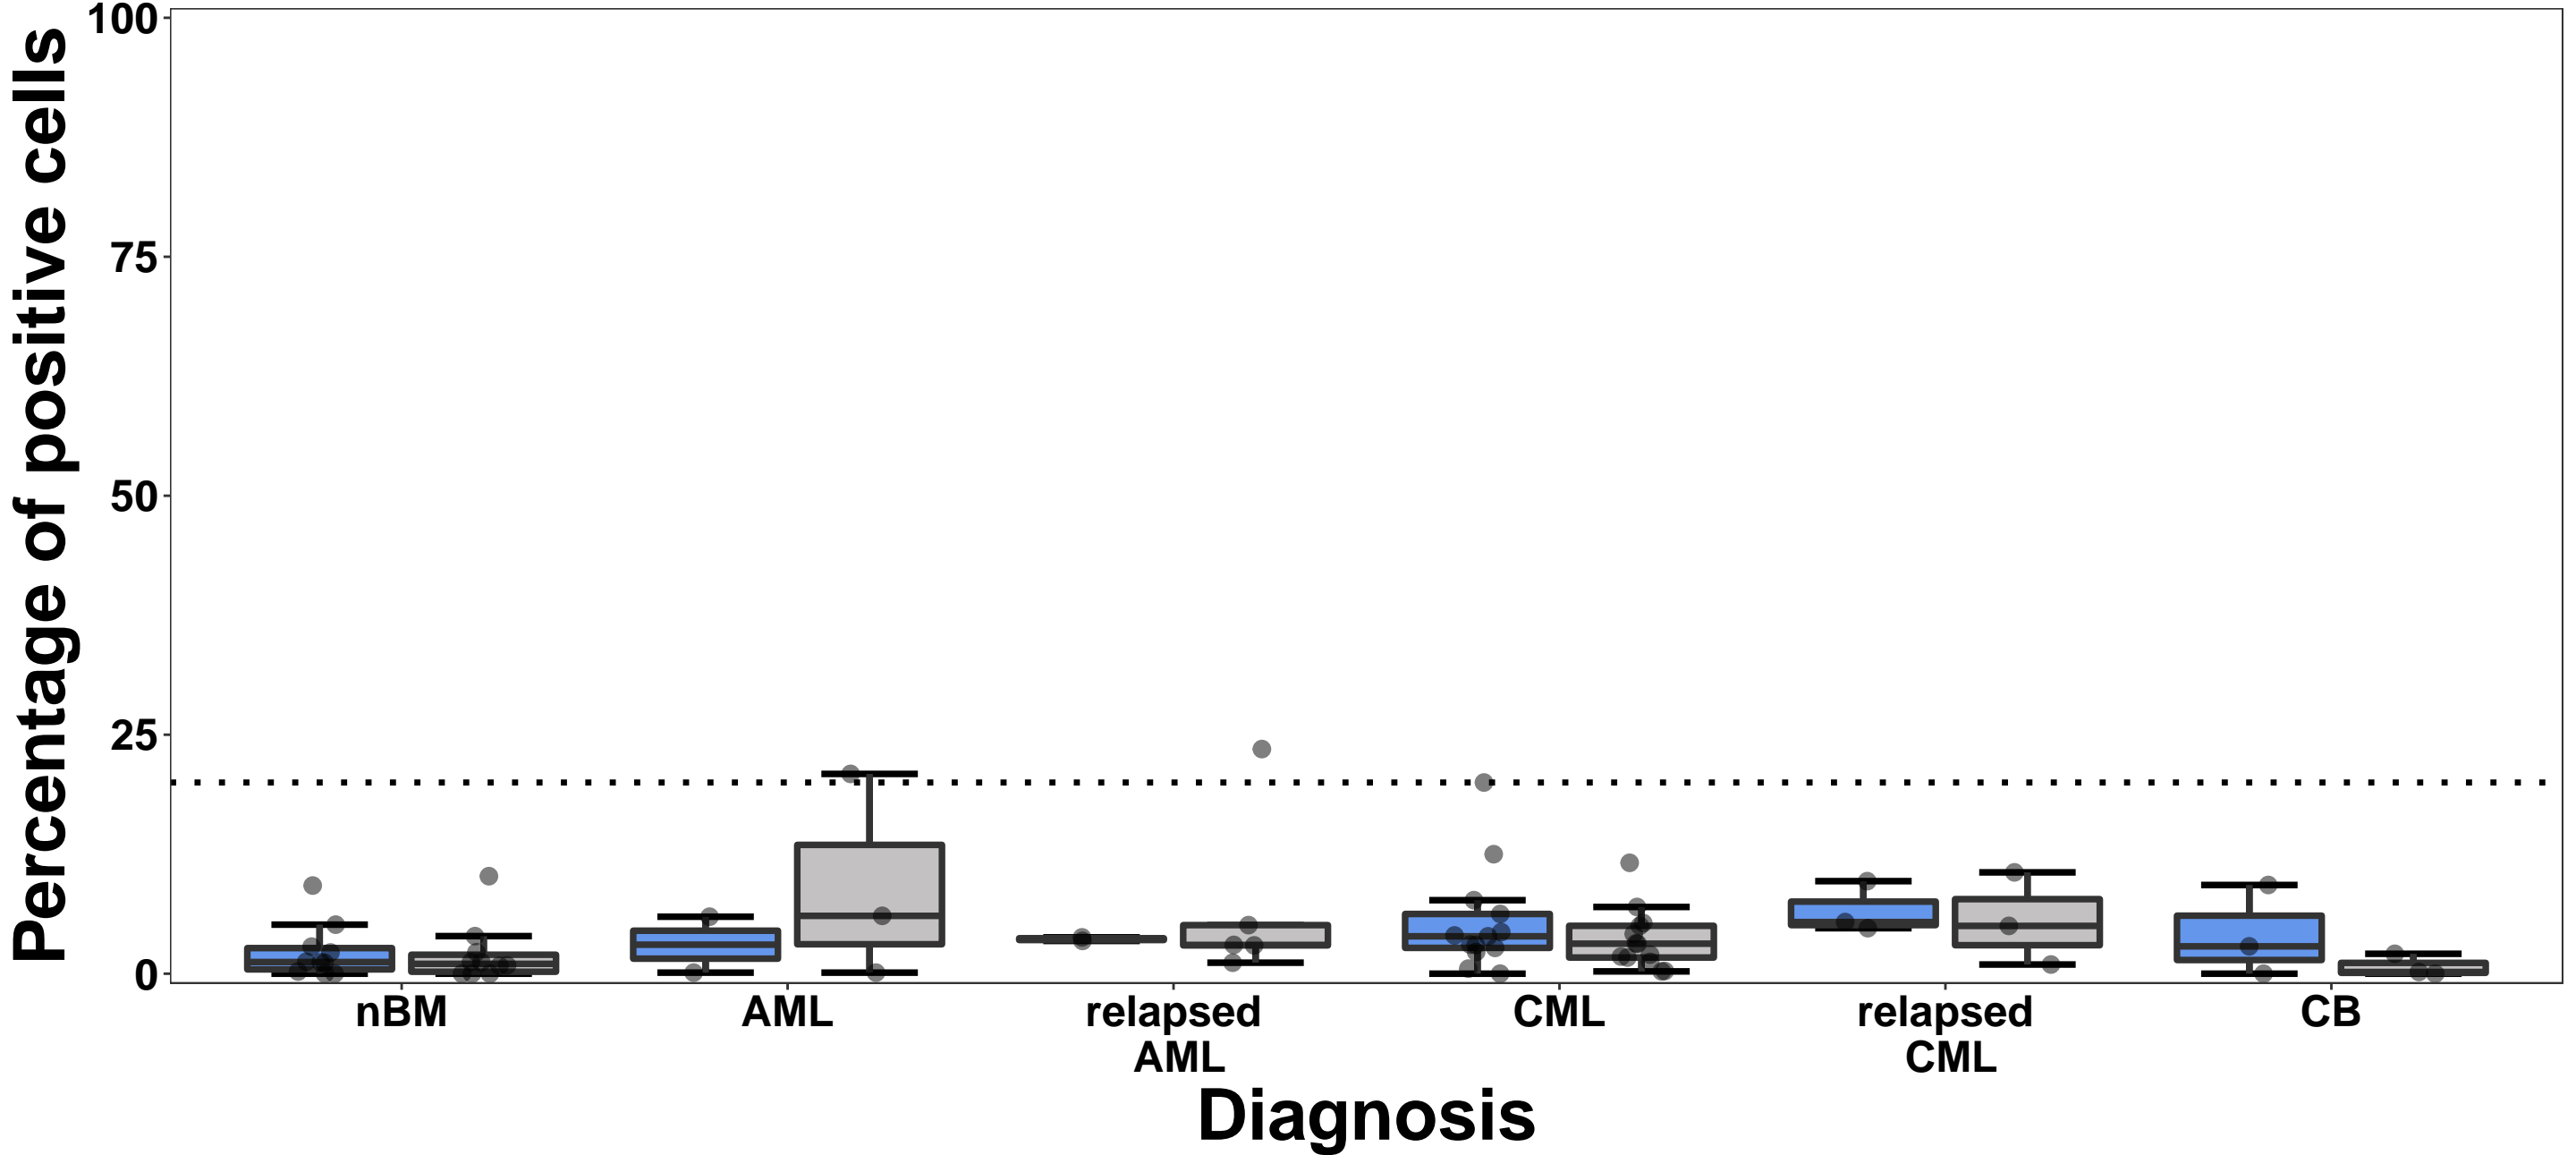

# CD131 staining index

Cell fraction  CD34+/CD38-  CD34+/CD38+

Staining index

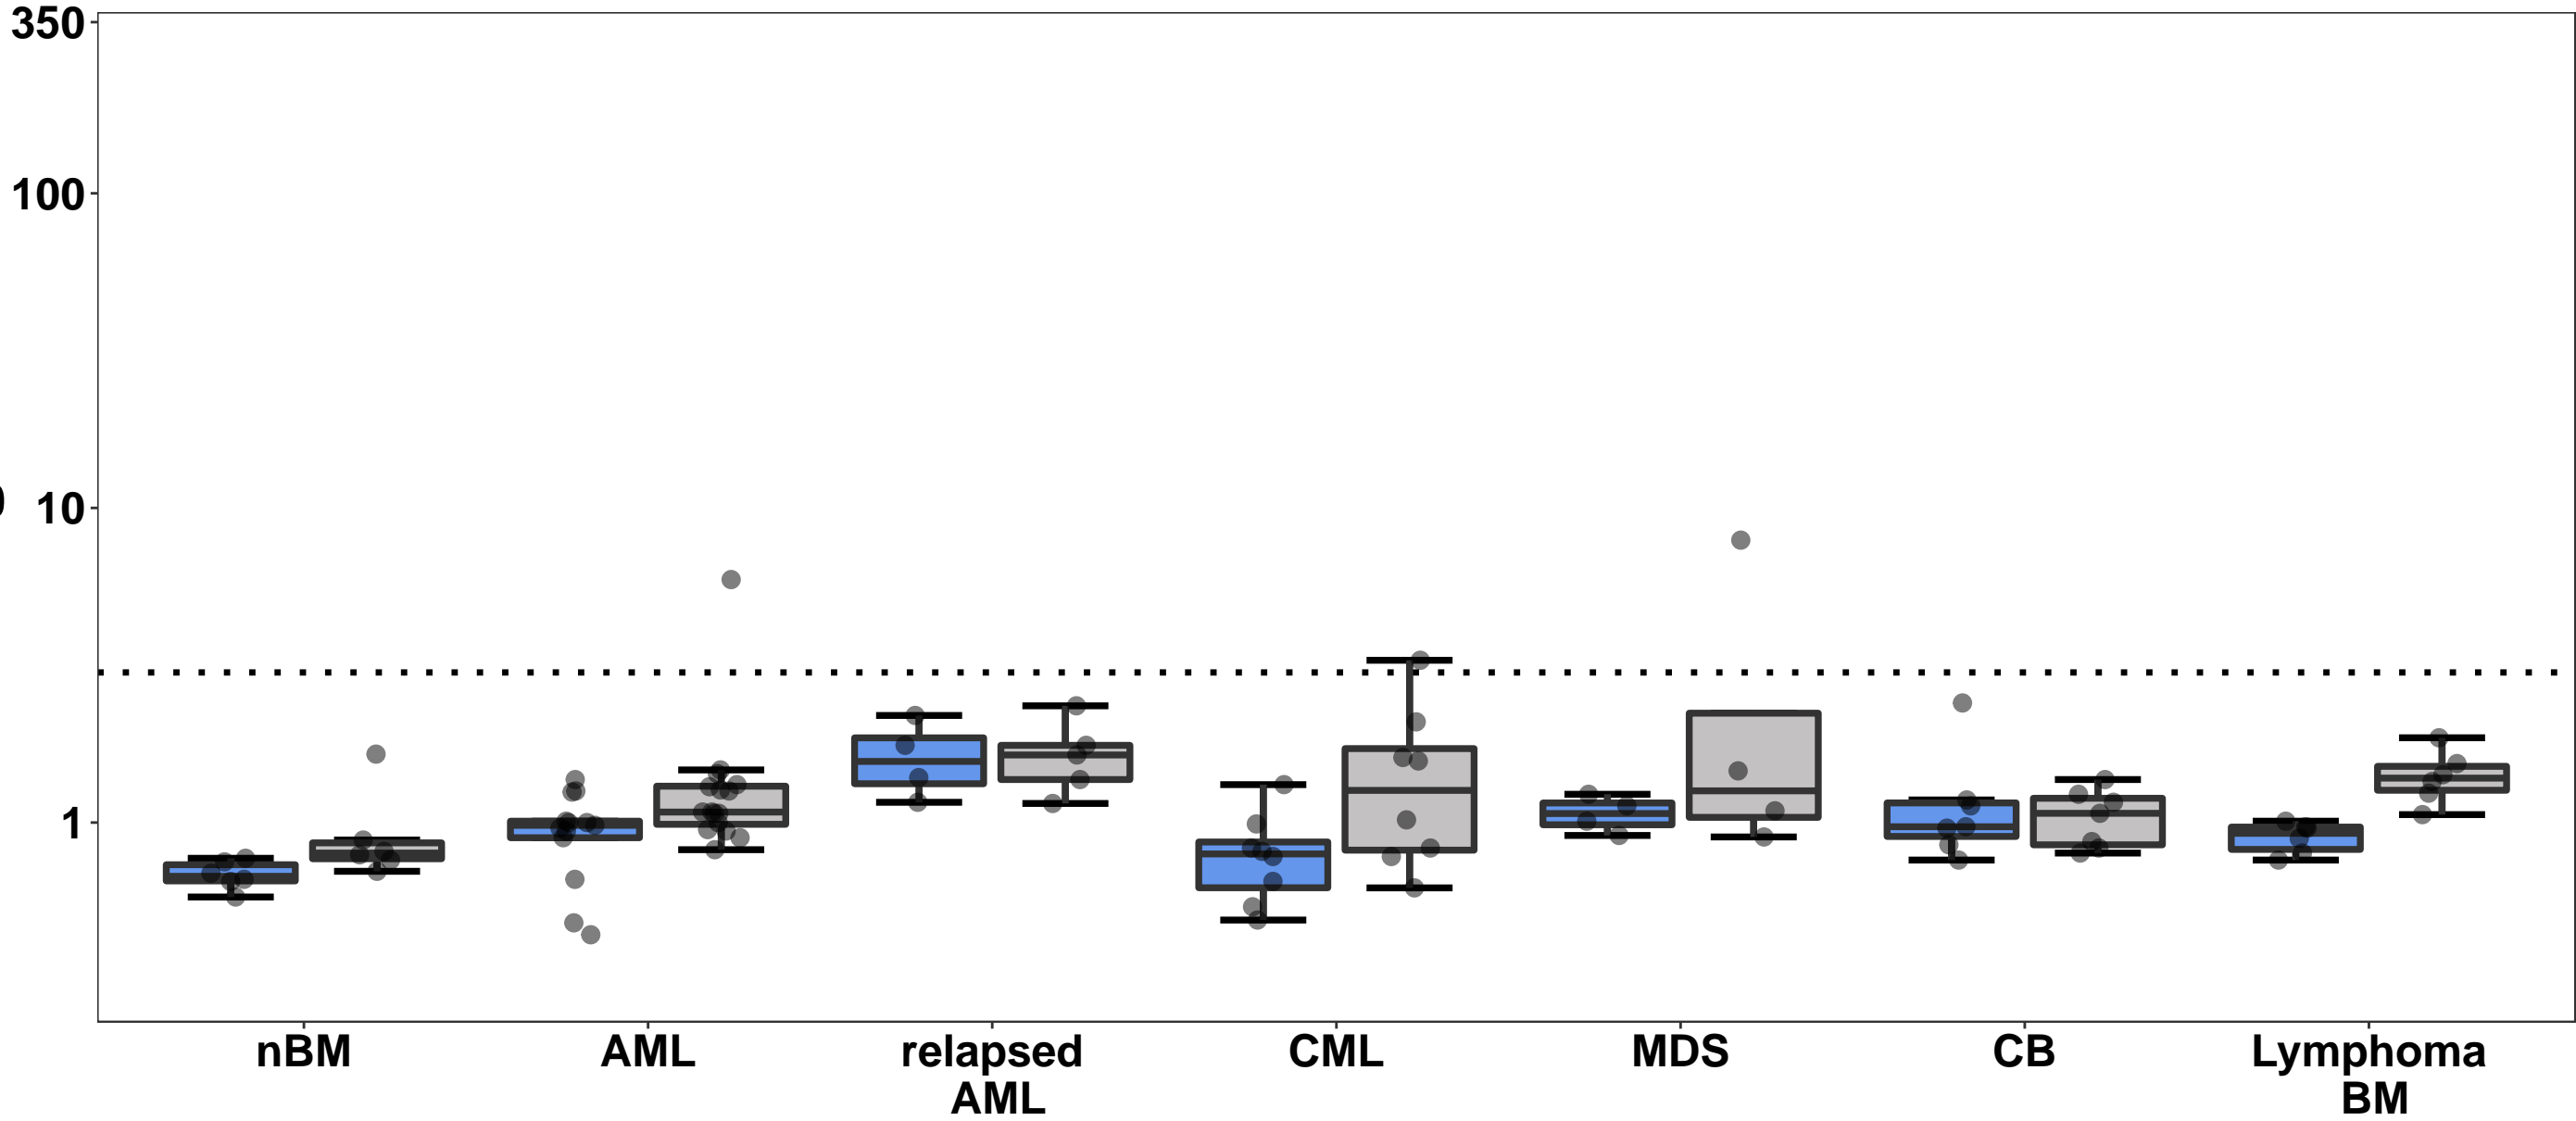

Cell fraction  CD34+/CD38-  CD34+/CD38+

# CD131 percentage

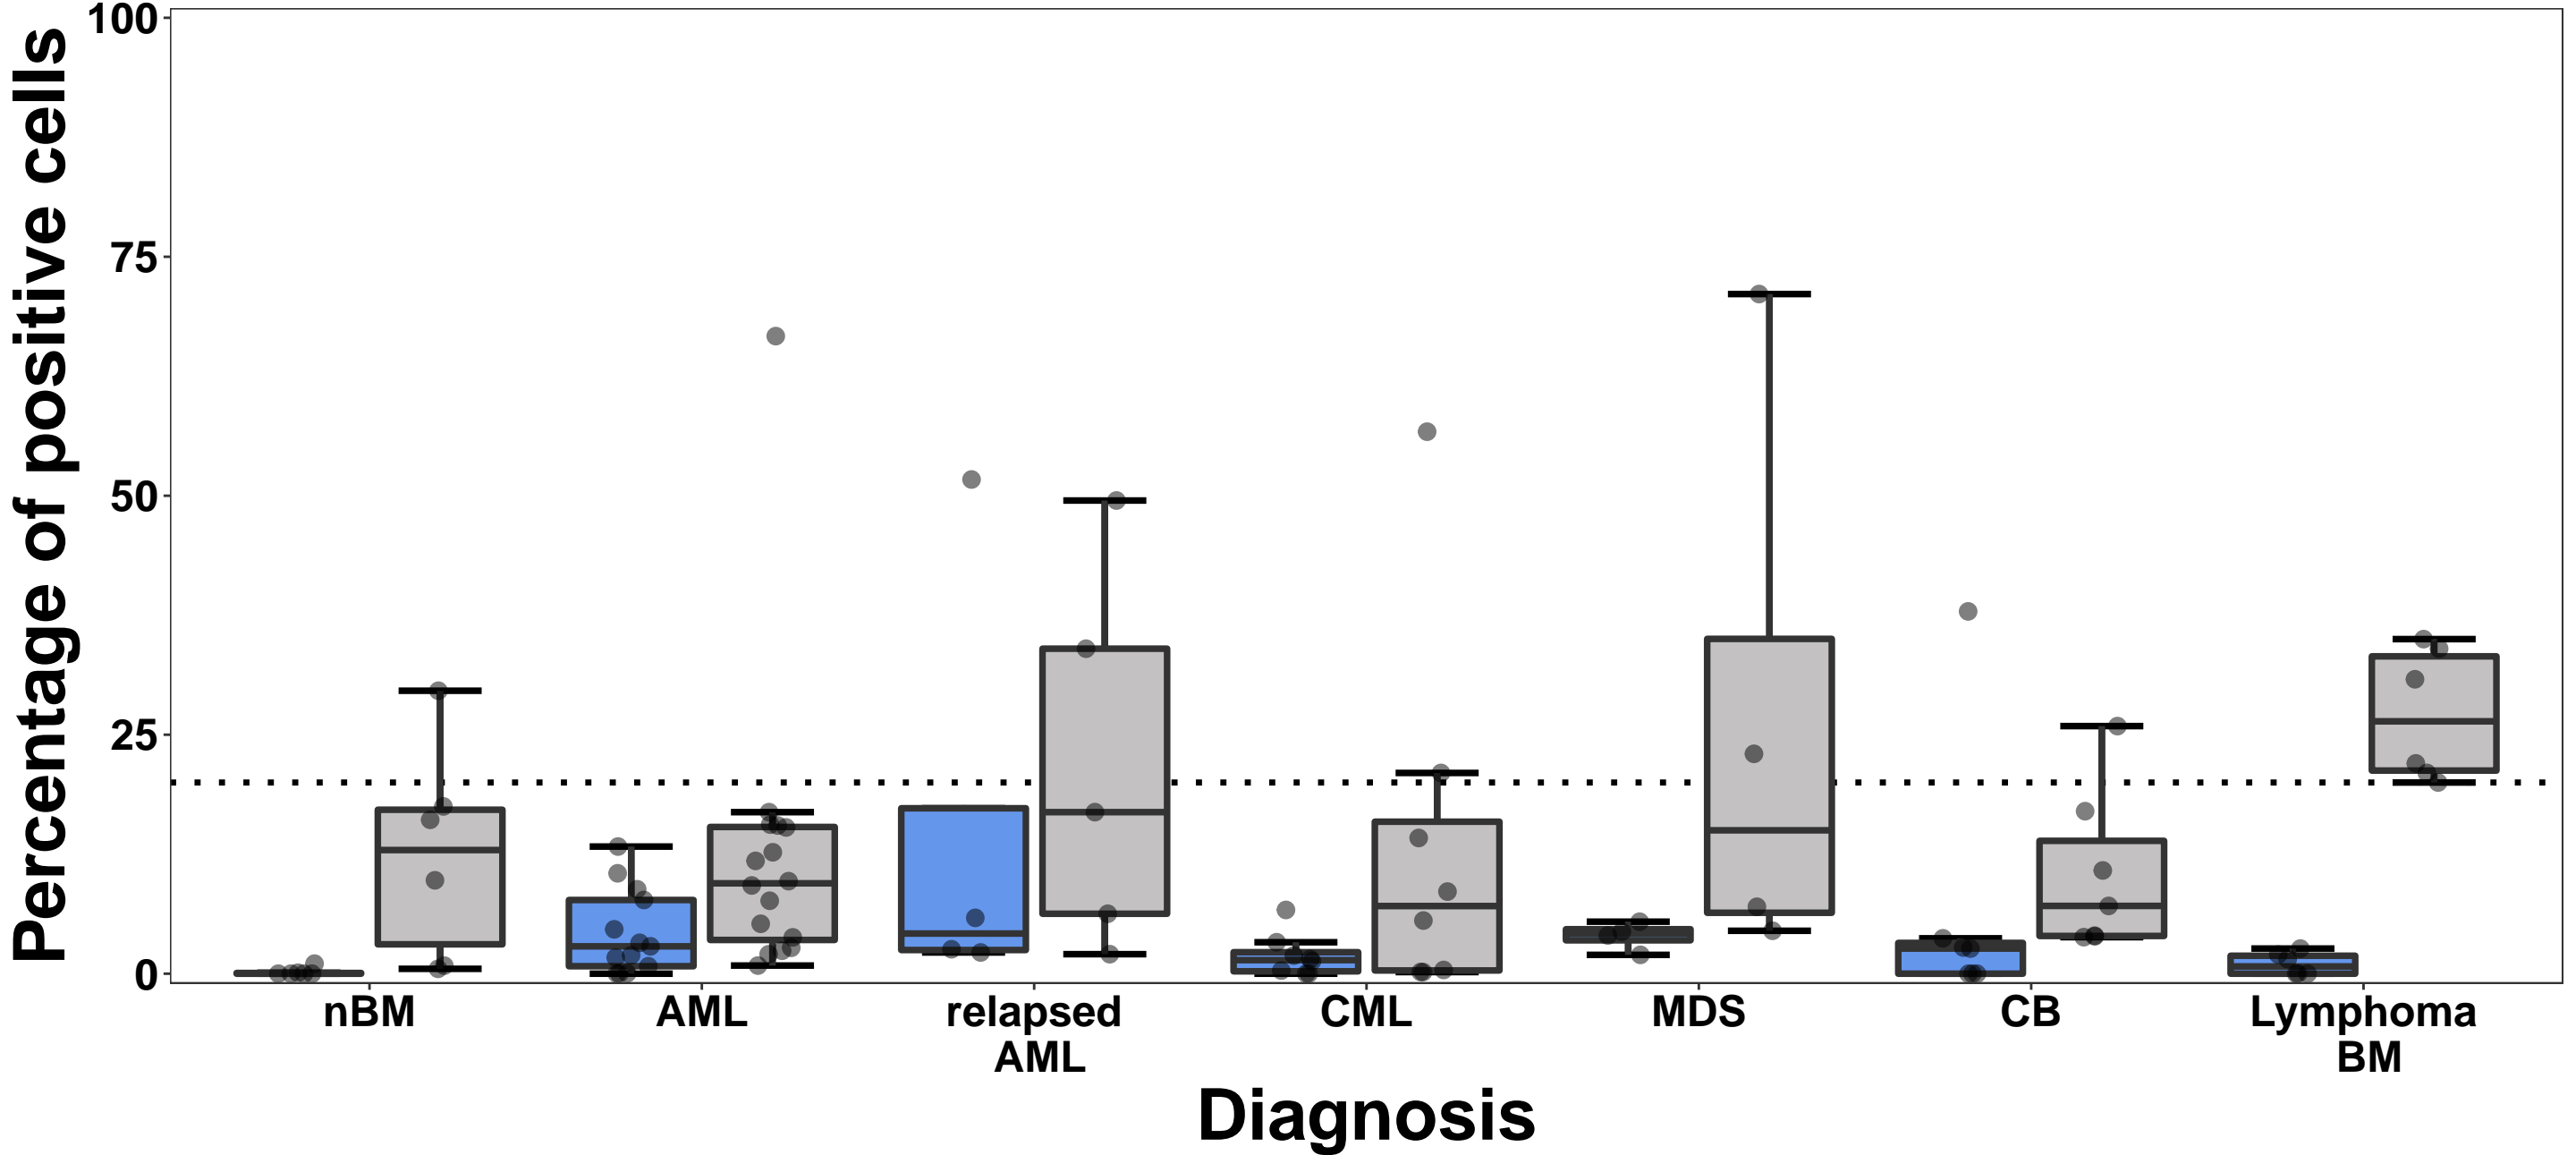

# CD132 staining index

Cell fraction  CD34+/CD38-  CD34+/CD38+

Staining index

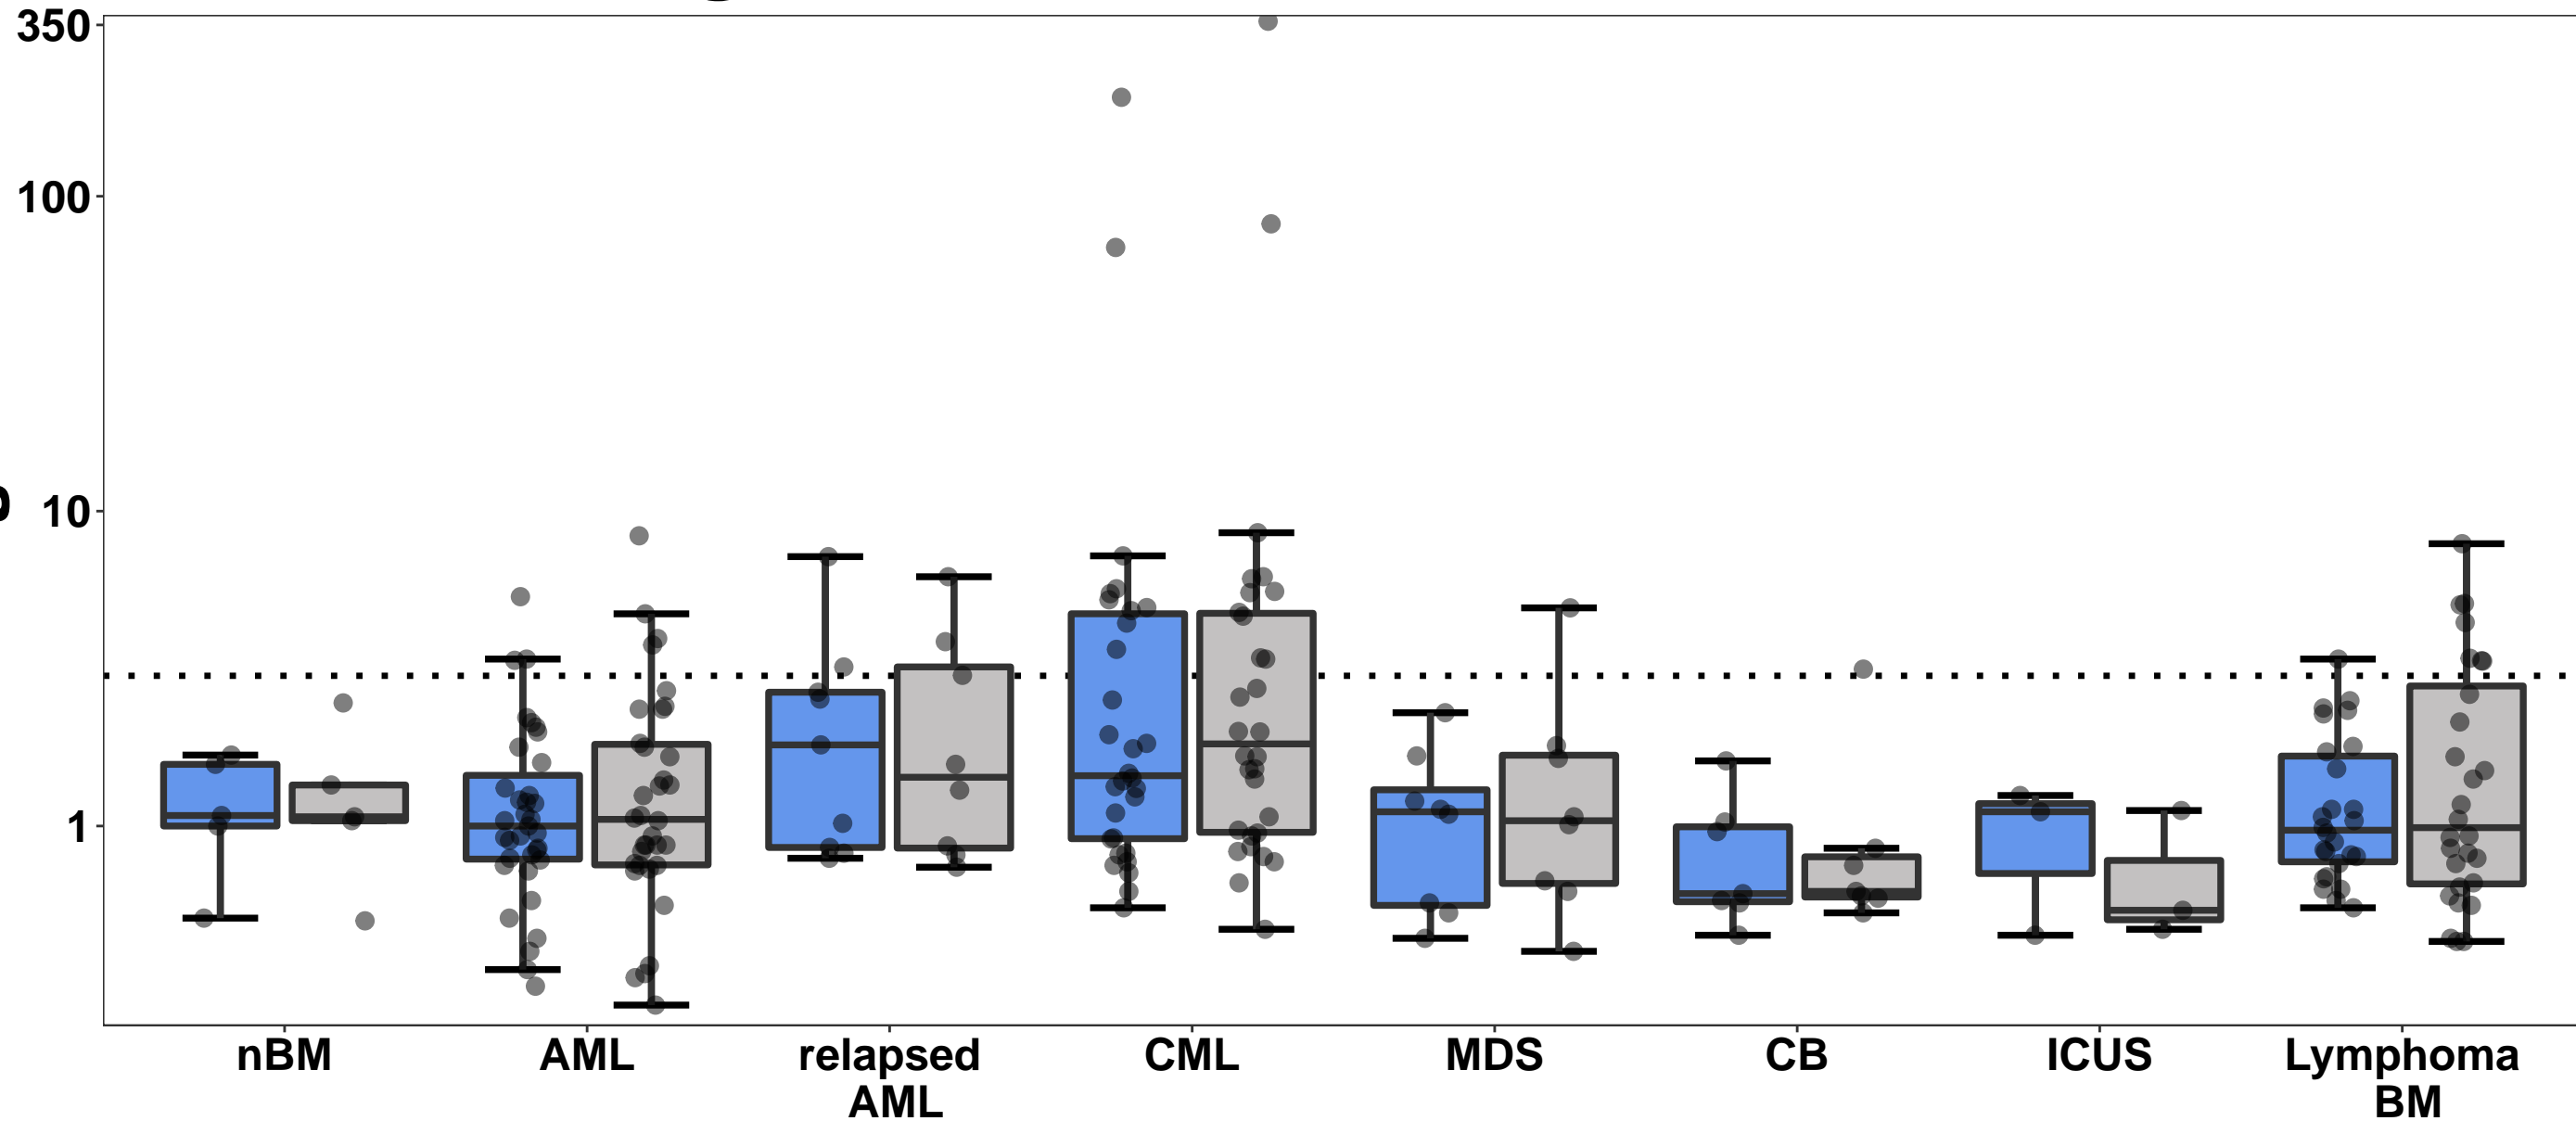

Diagnosis

Cell fraction  CD34+/CD38-  CD34+/CD38+

# CD132 percentage

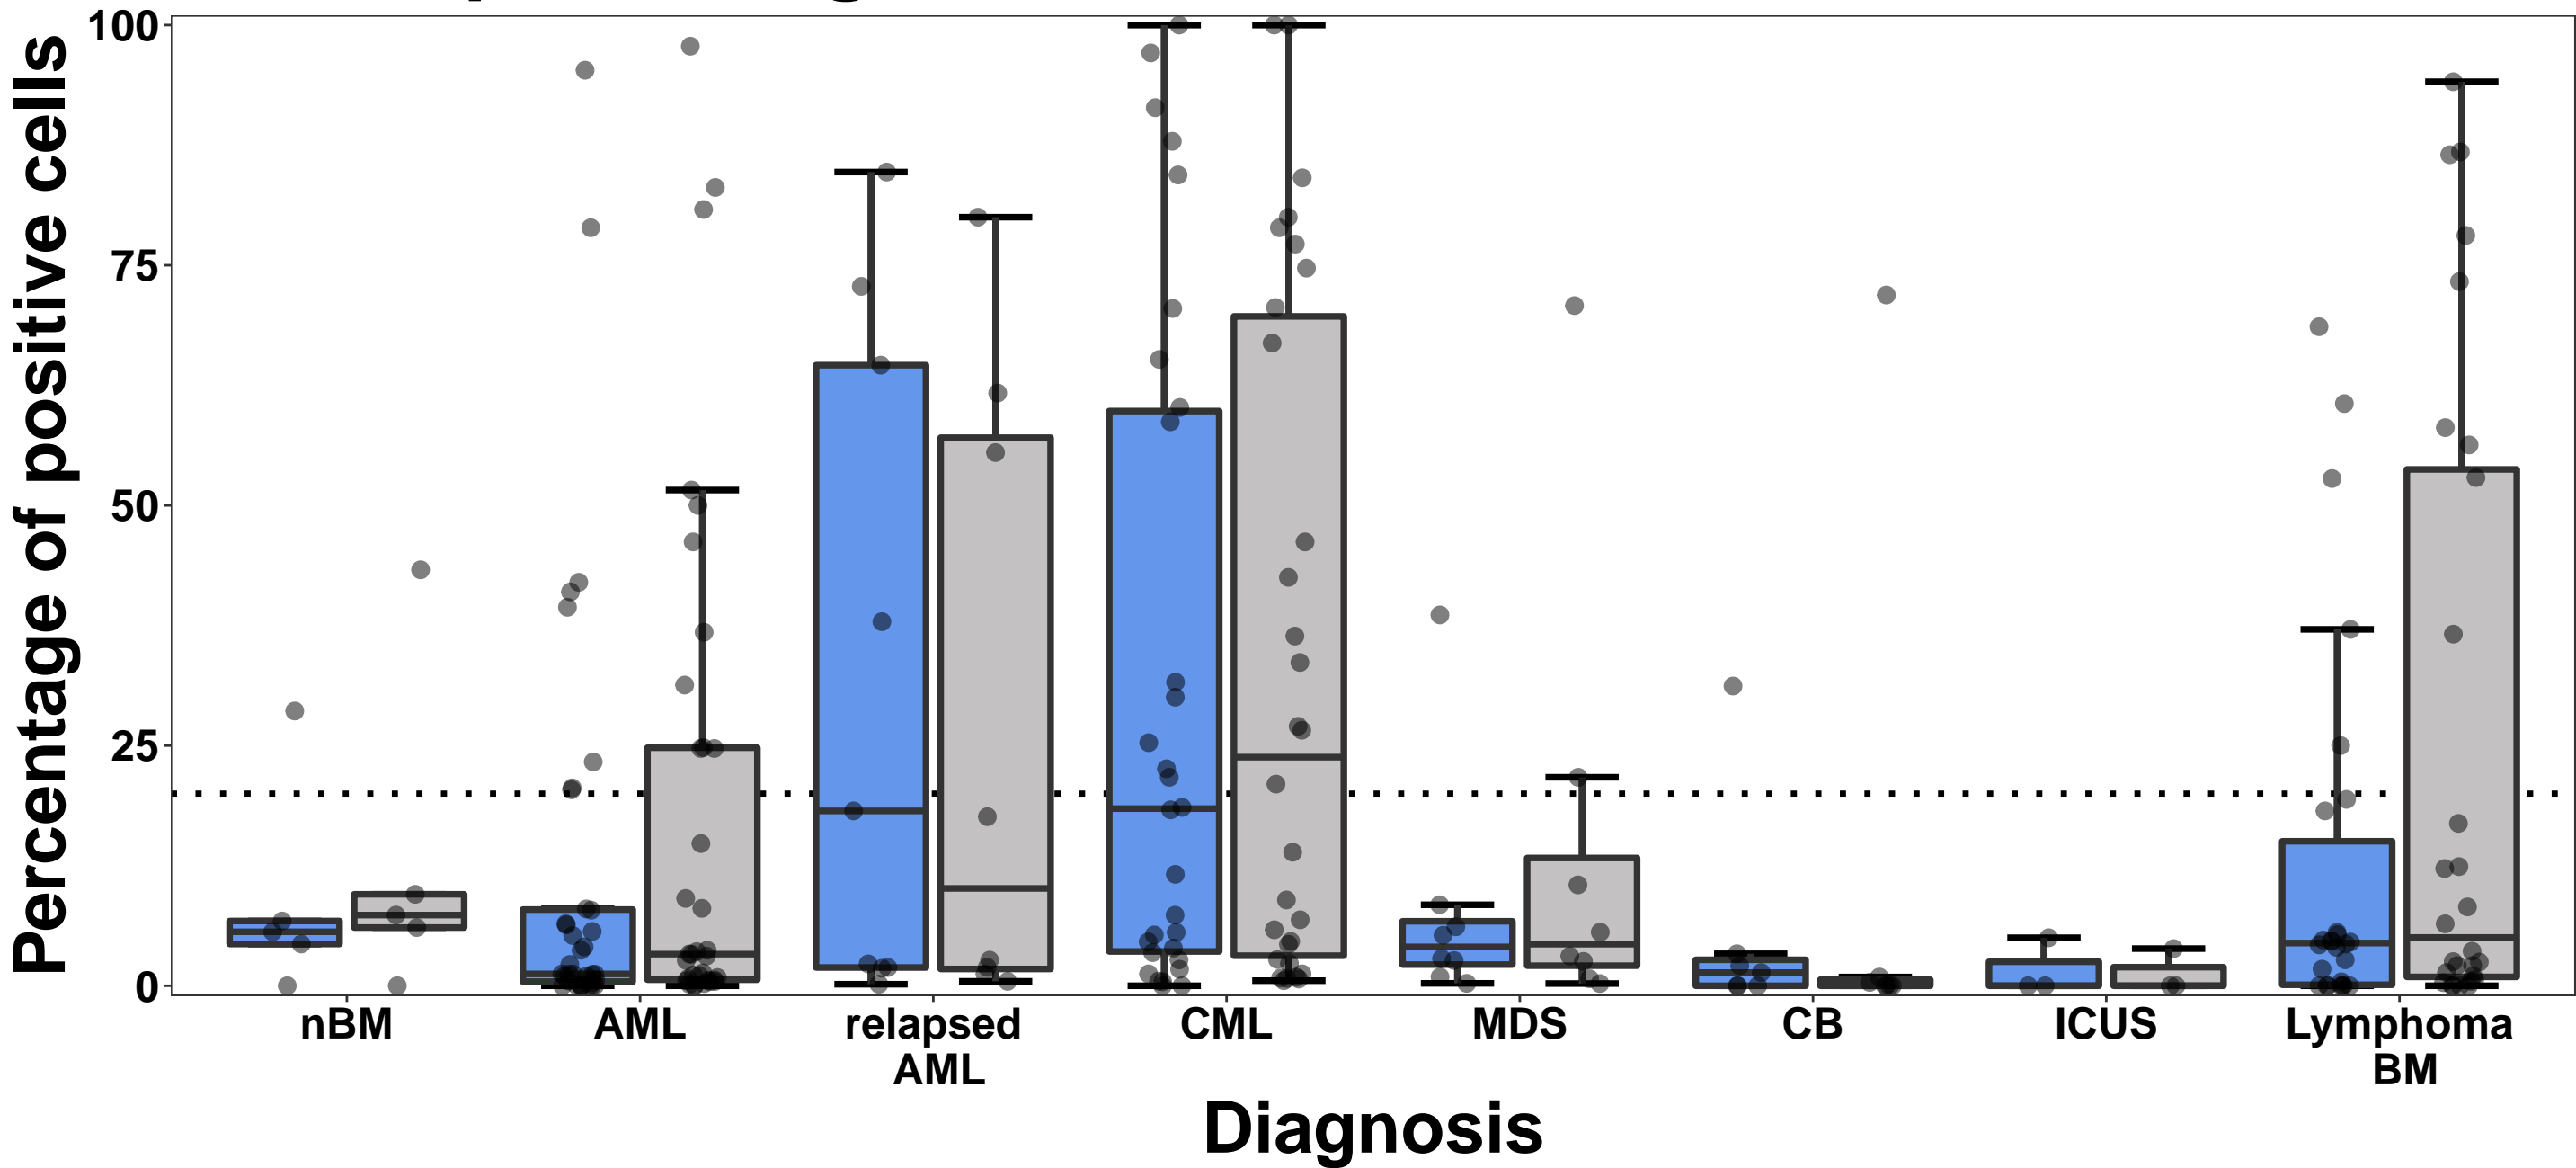

Cell fraction  CD34+/CD38-  CD34+/CD38+

# CD133 staining index

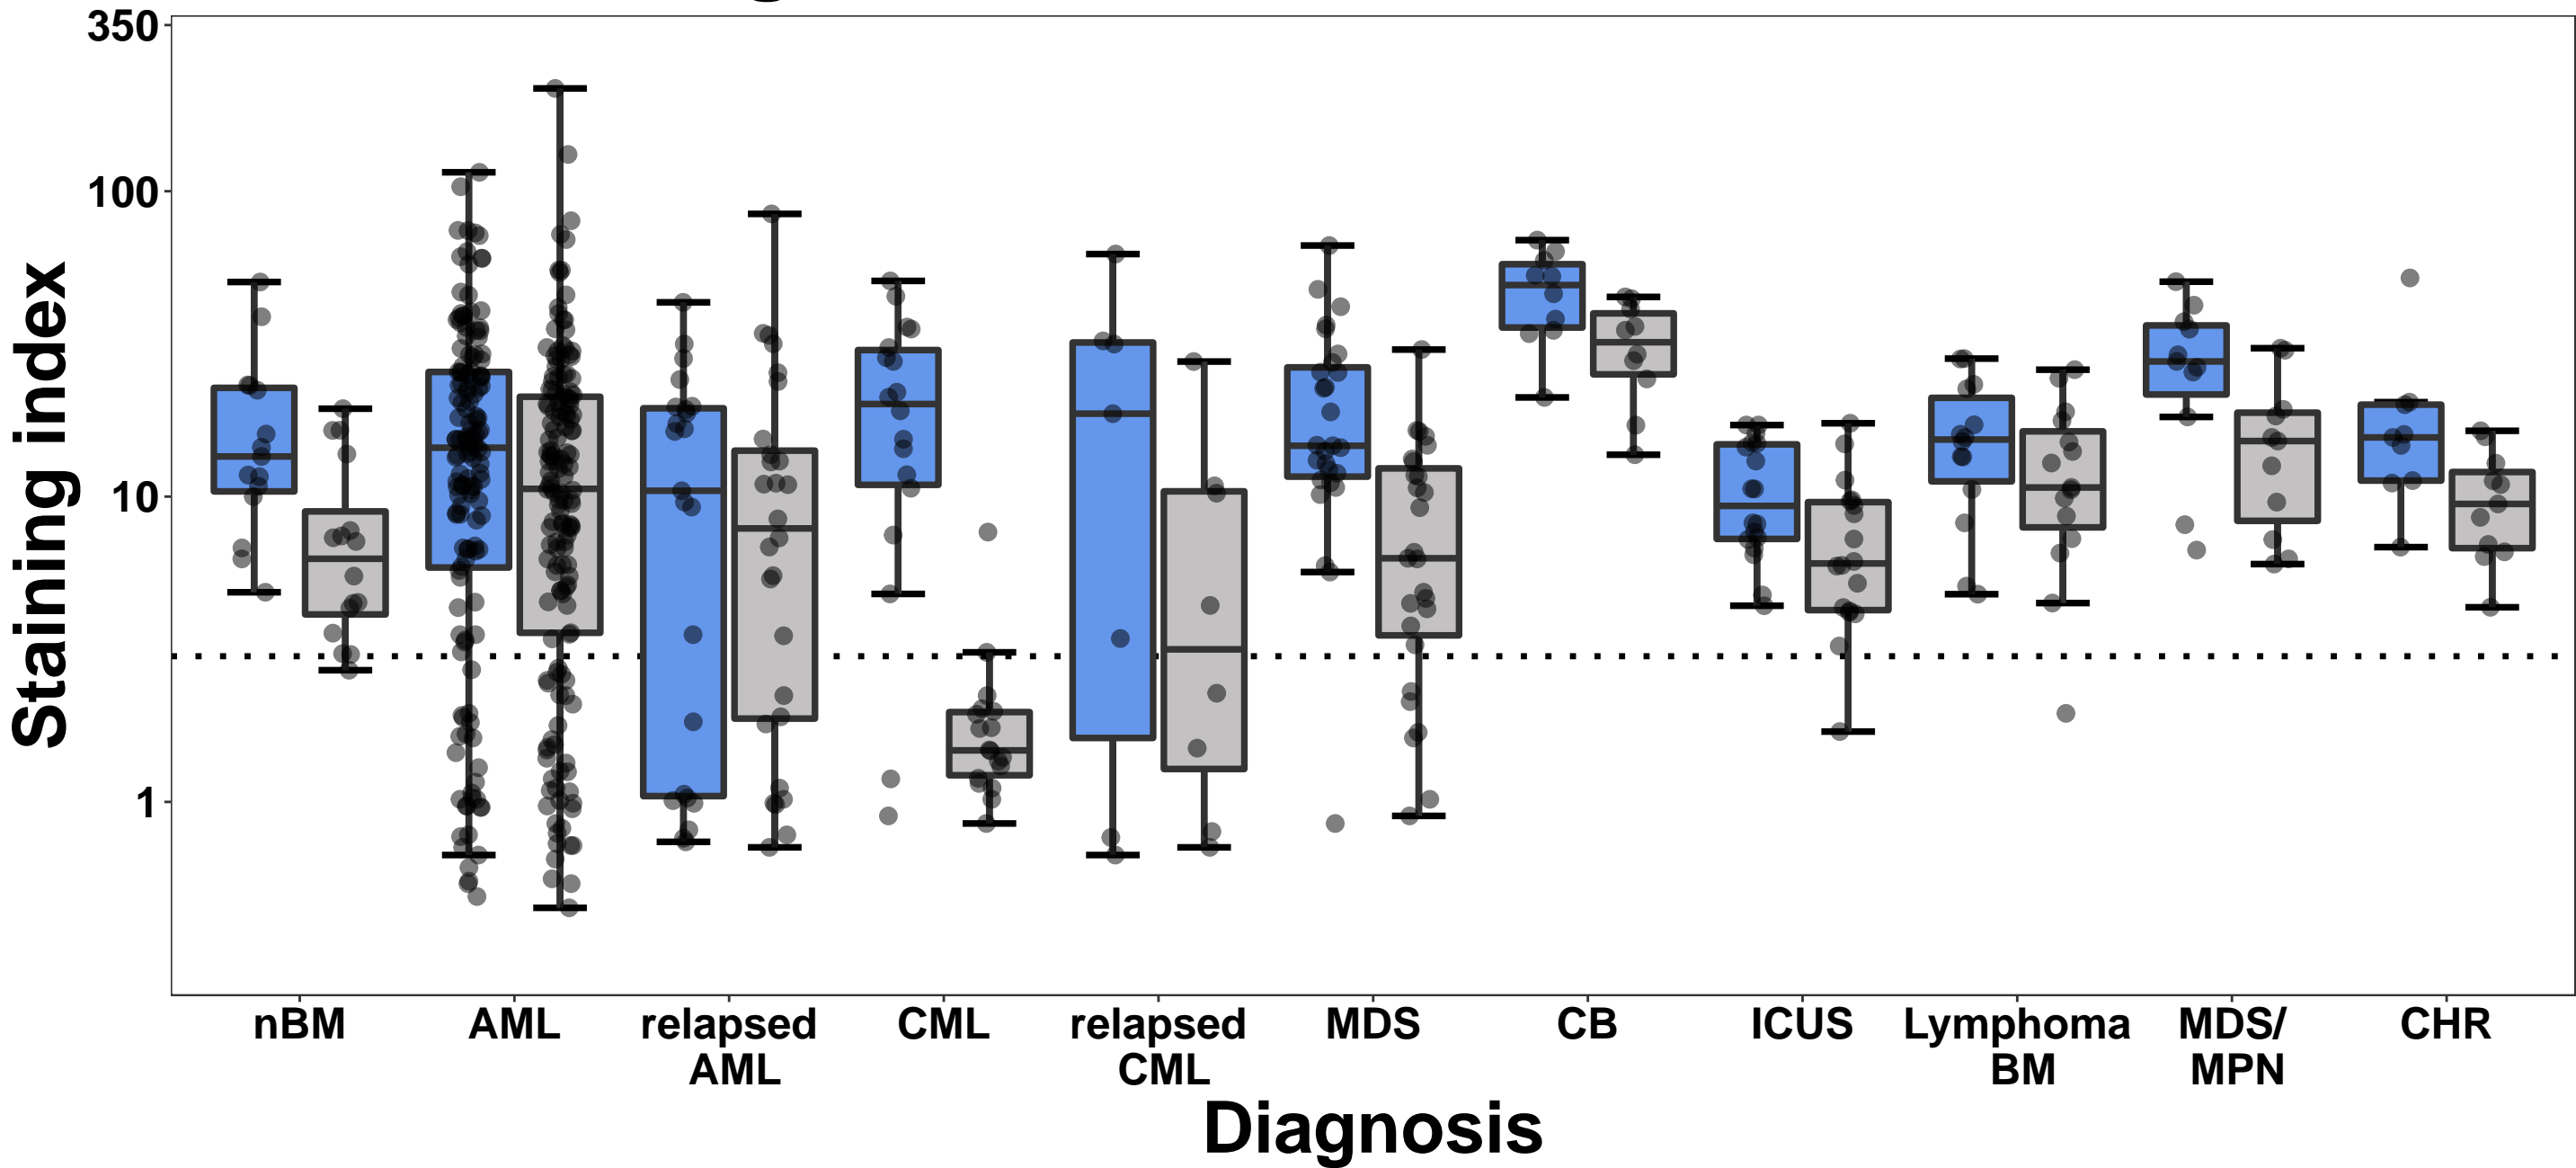



Cell fraction  CD34+/CD38-  CD34+/CD38+

# CD133 percentage

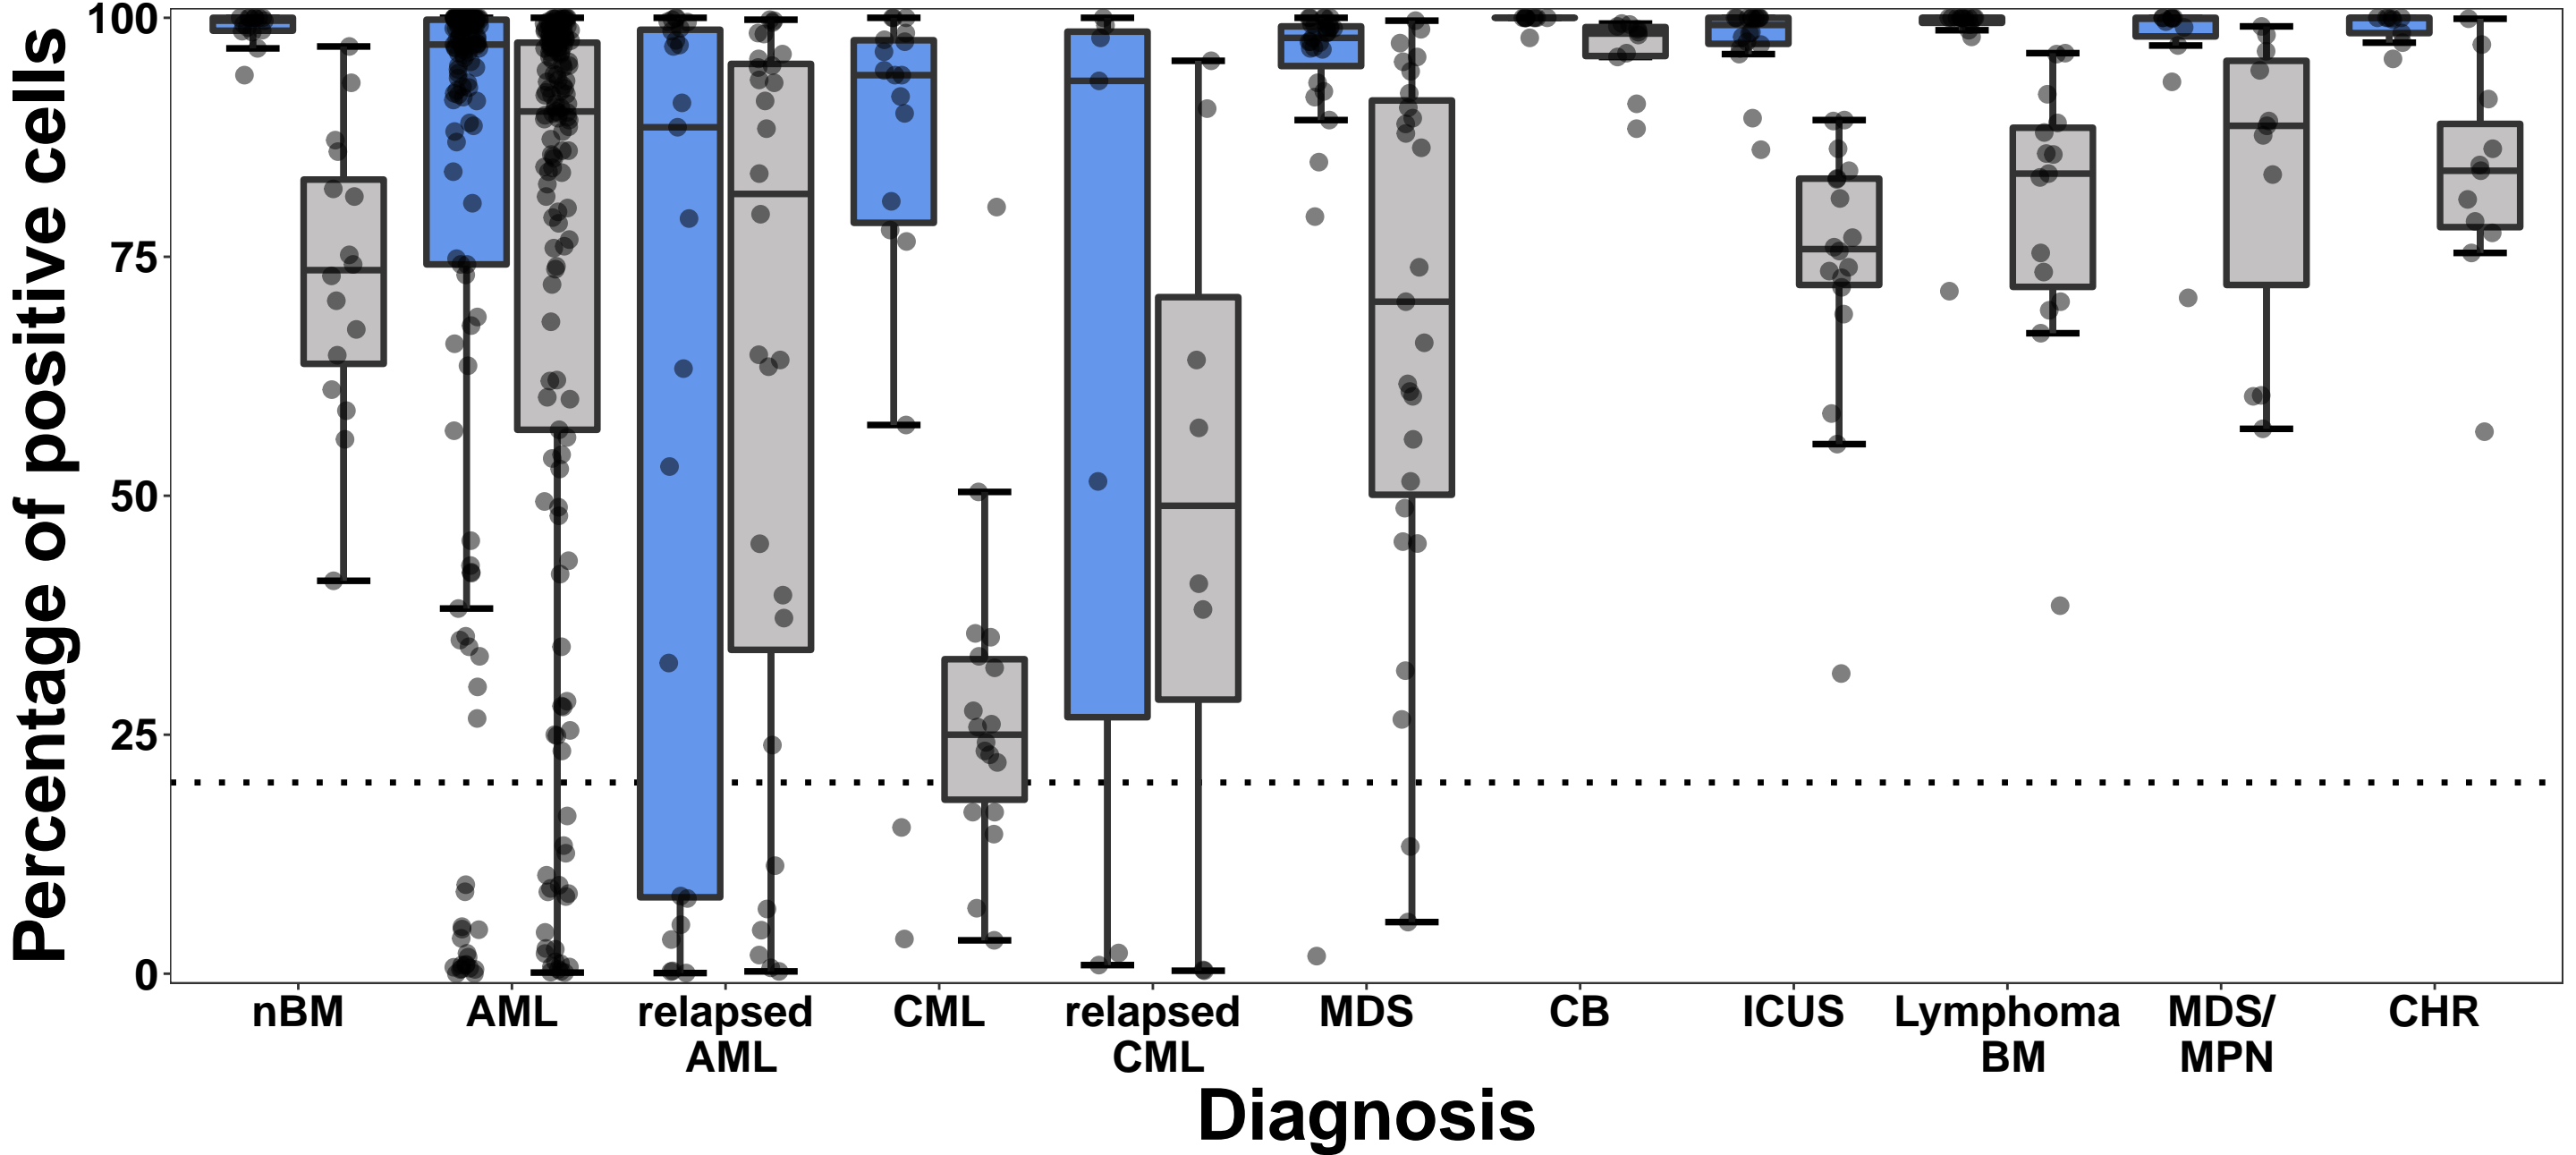

Cell fraction  CD34+/CD38-  CD34+/CD38+

# CD134 staining index

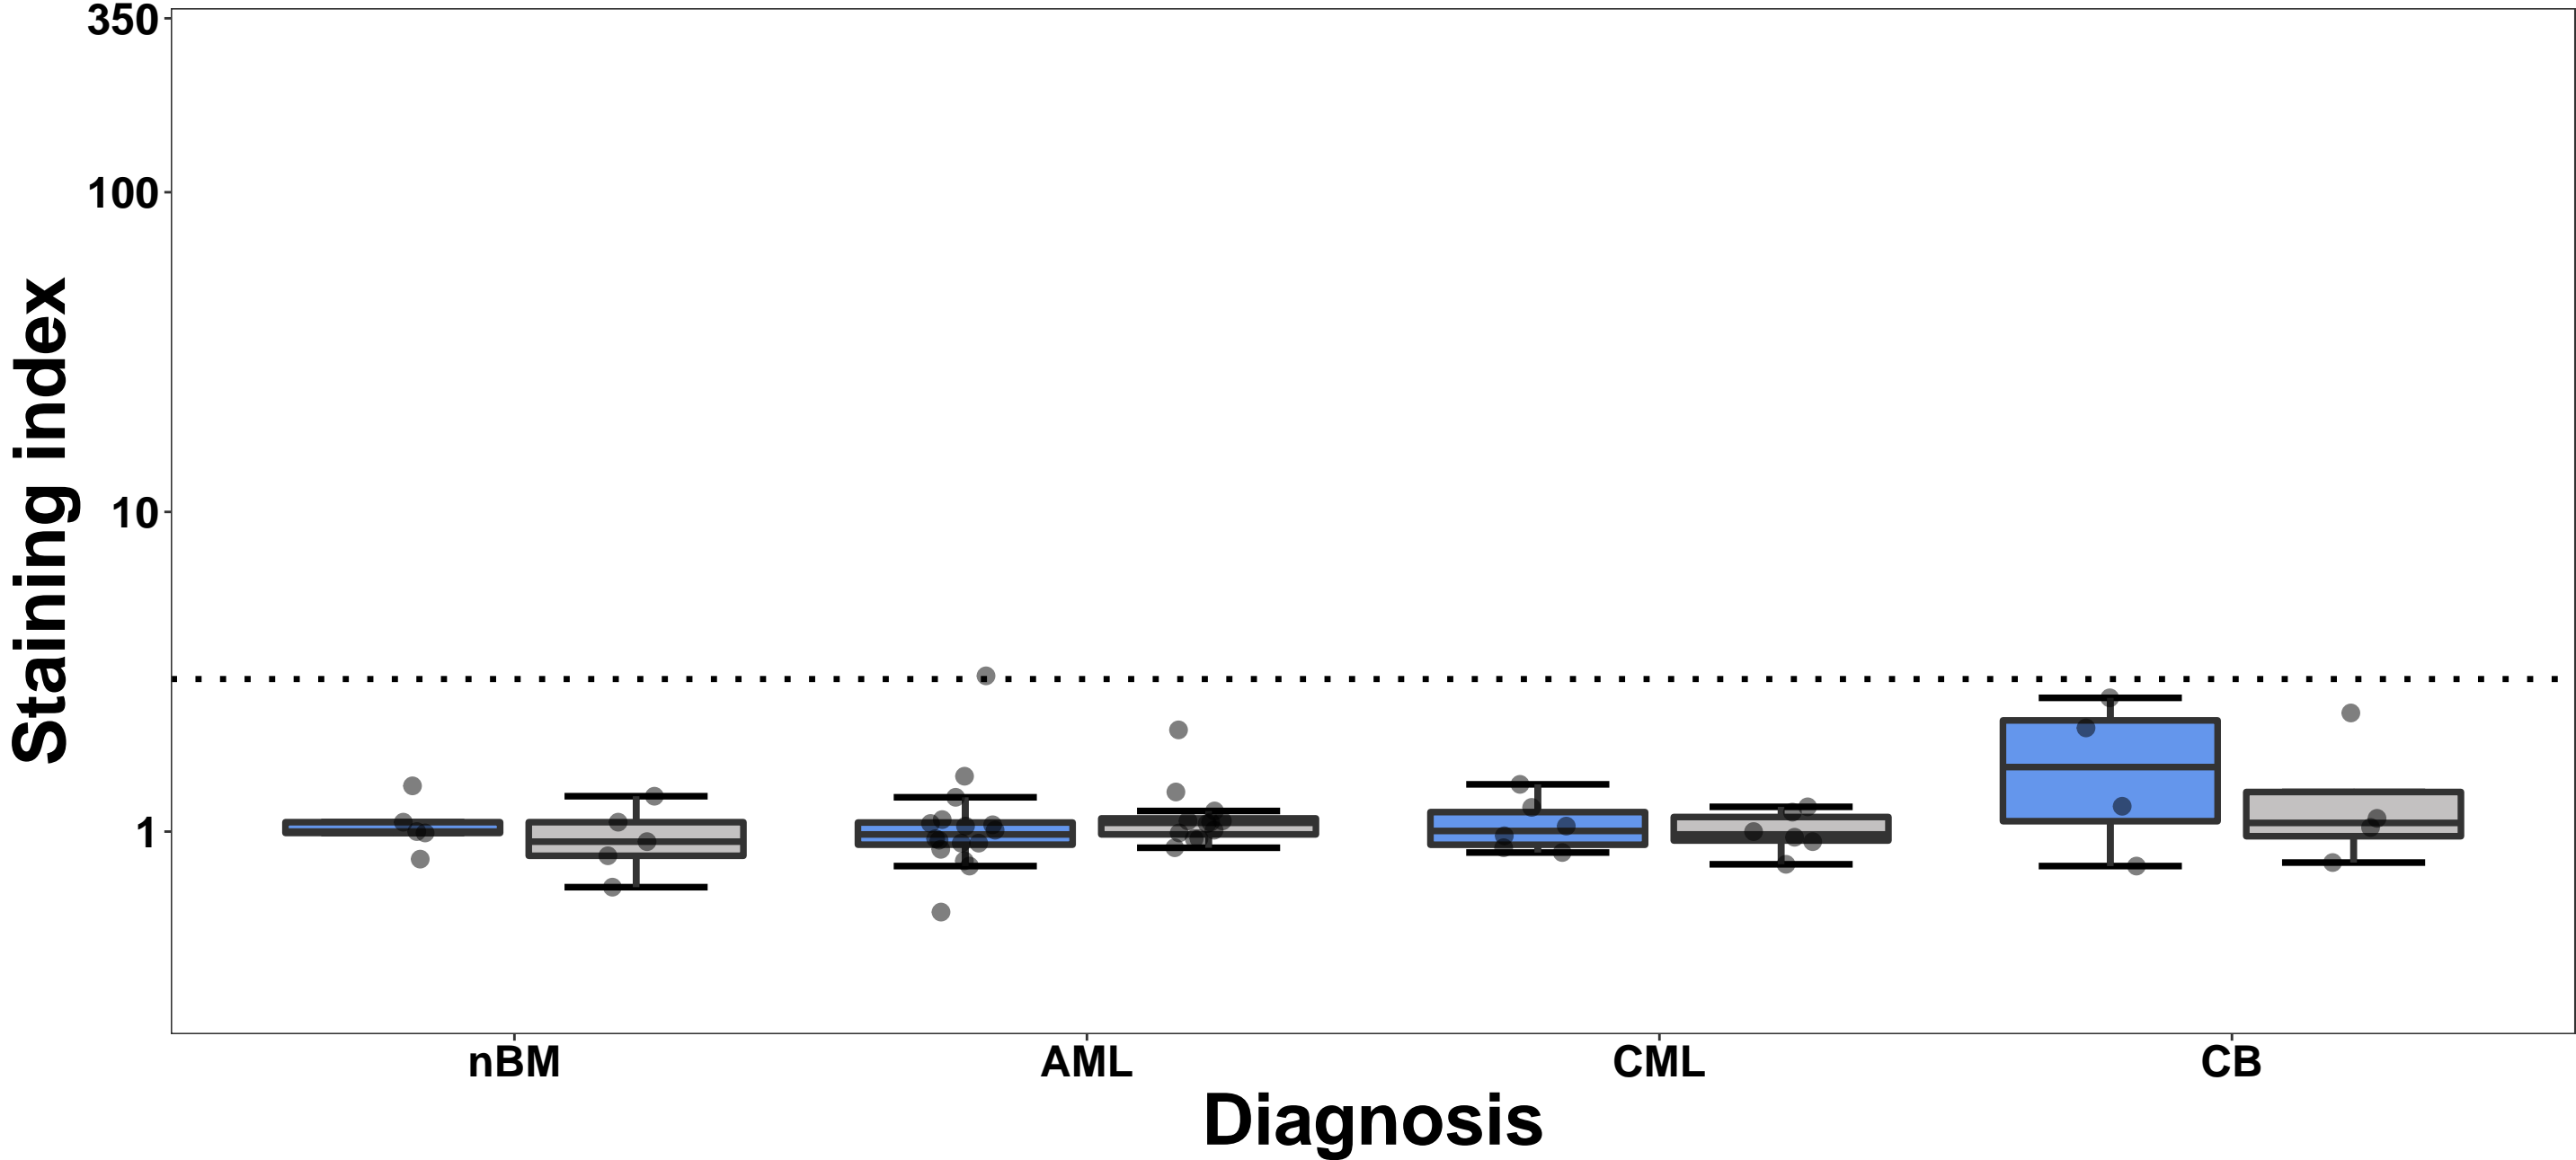

Cell fraction  CD34+/CD38-  CD34+/CD38+

# CD134 percentage

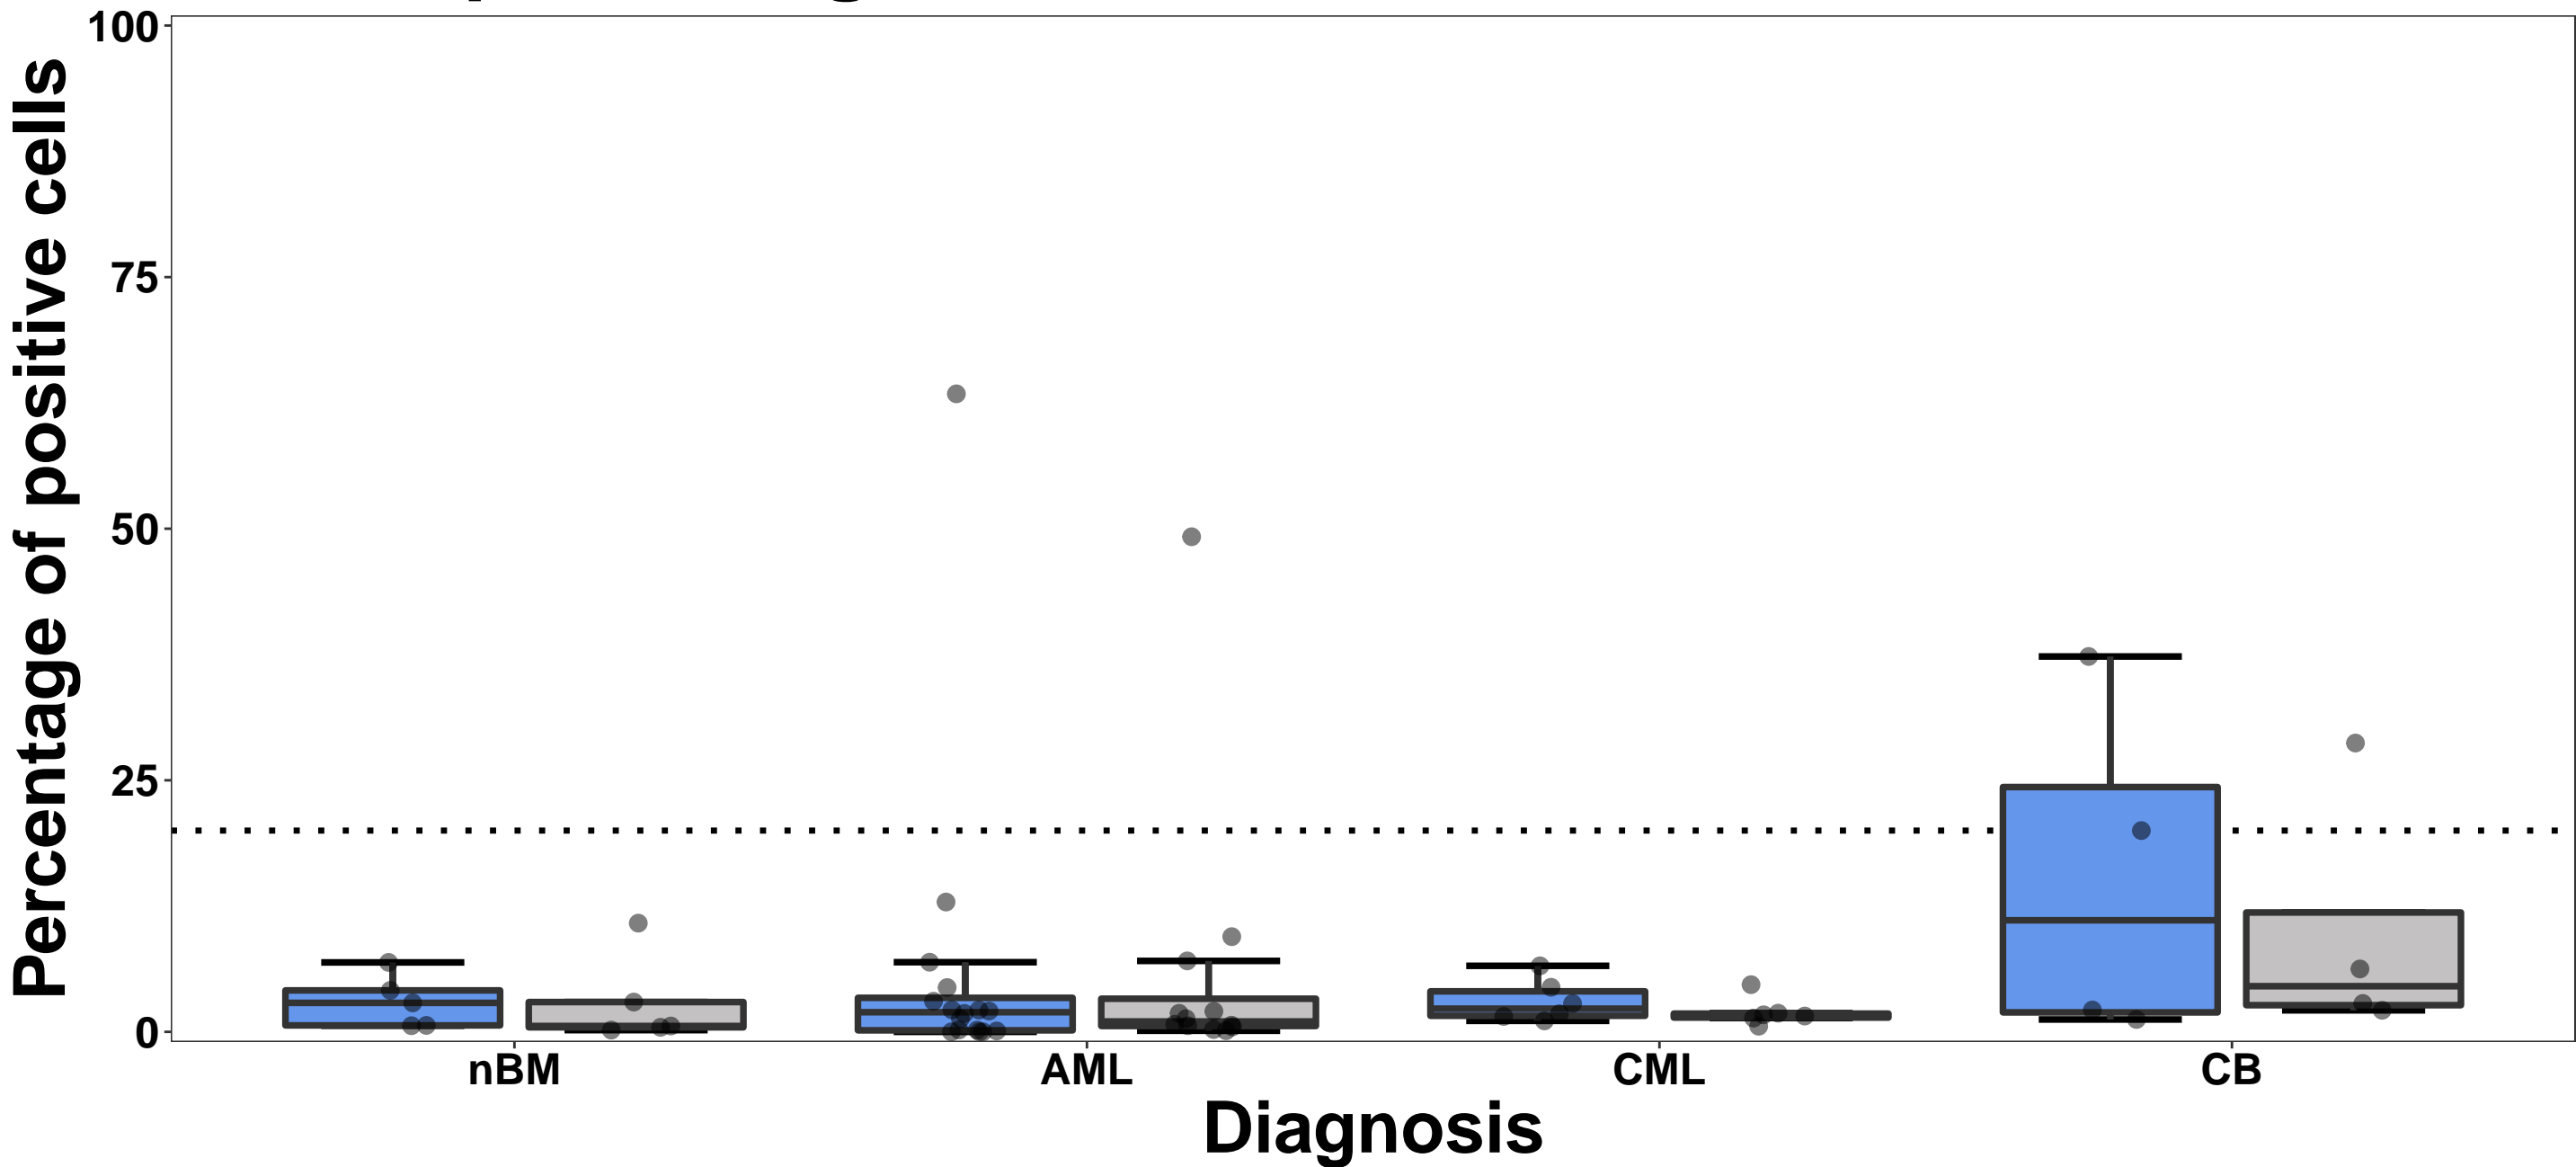

Cell fraction  CD34+/CD38-  CD34+/CD38+

# CD135 staining index

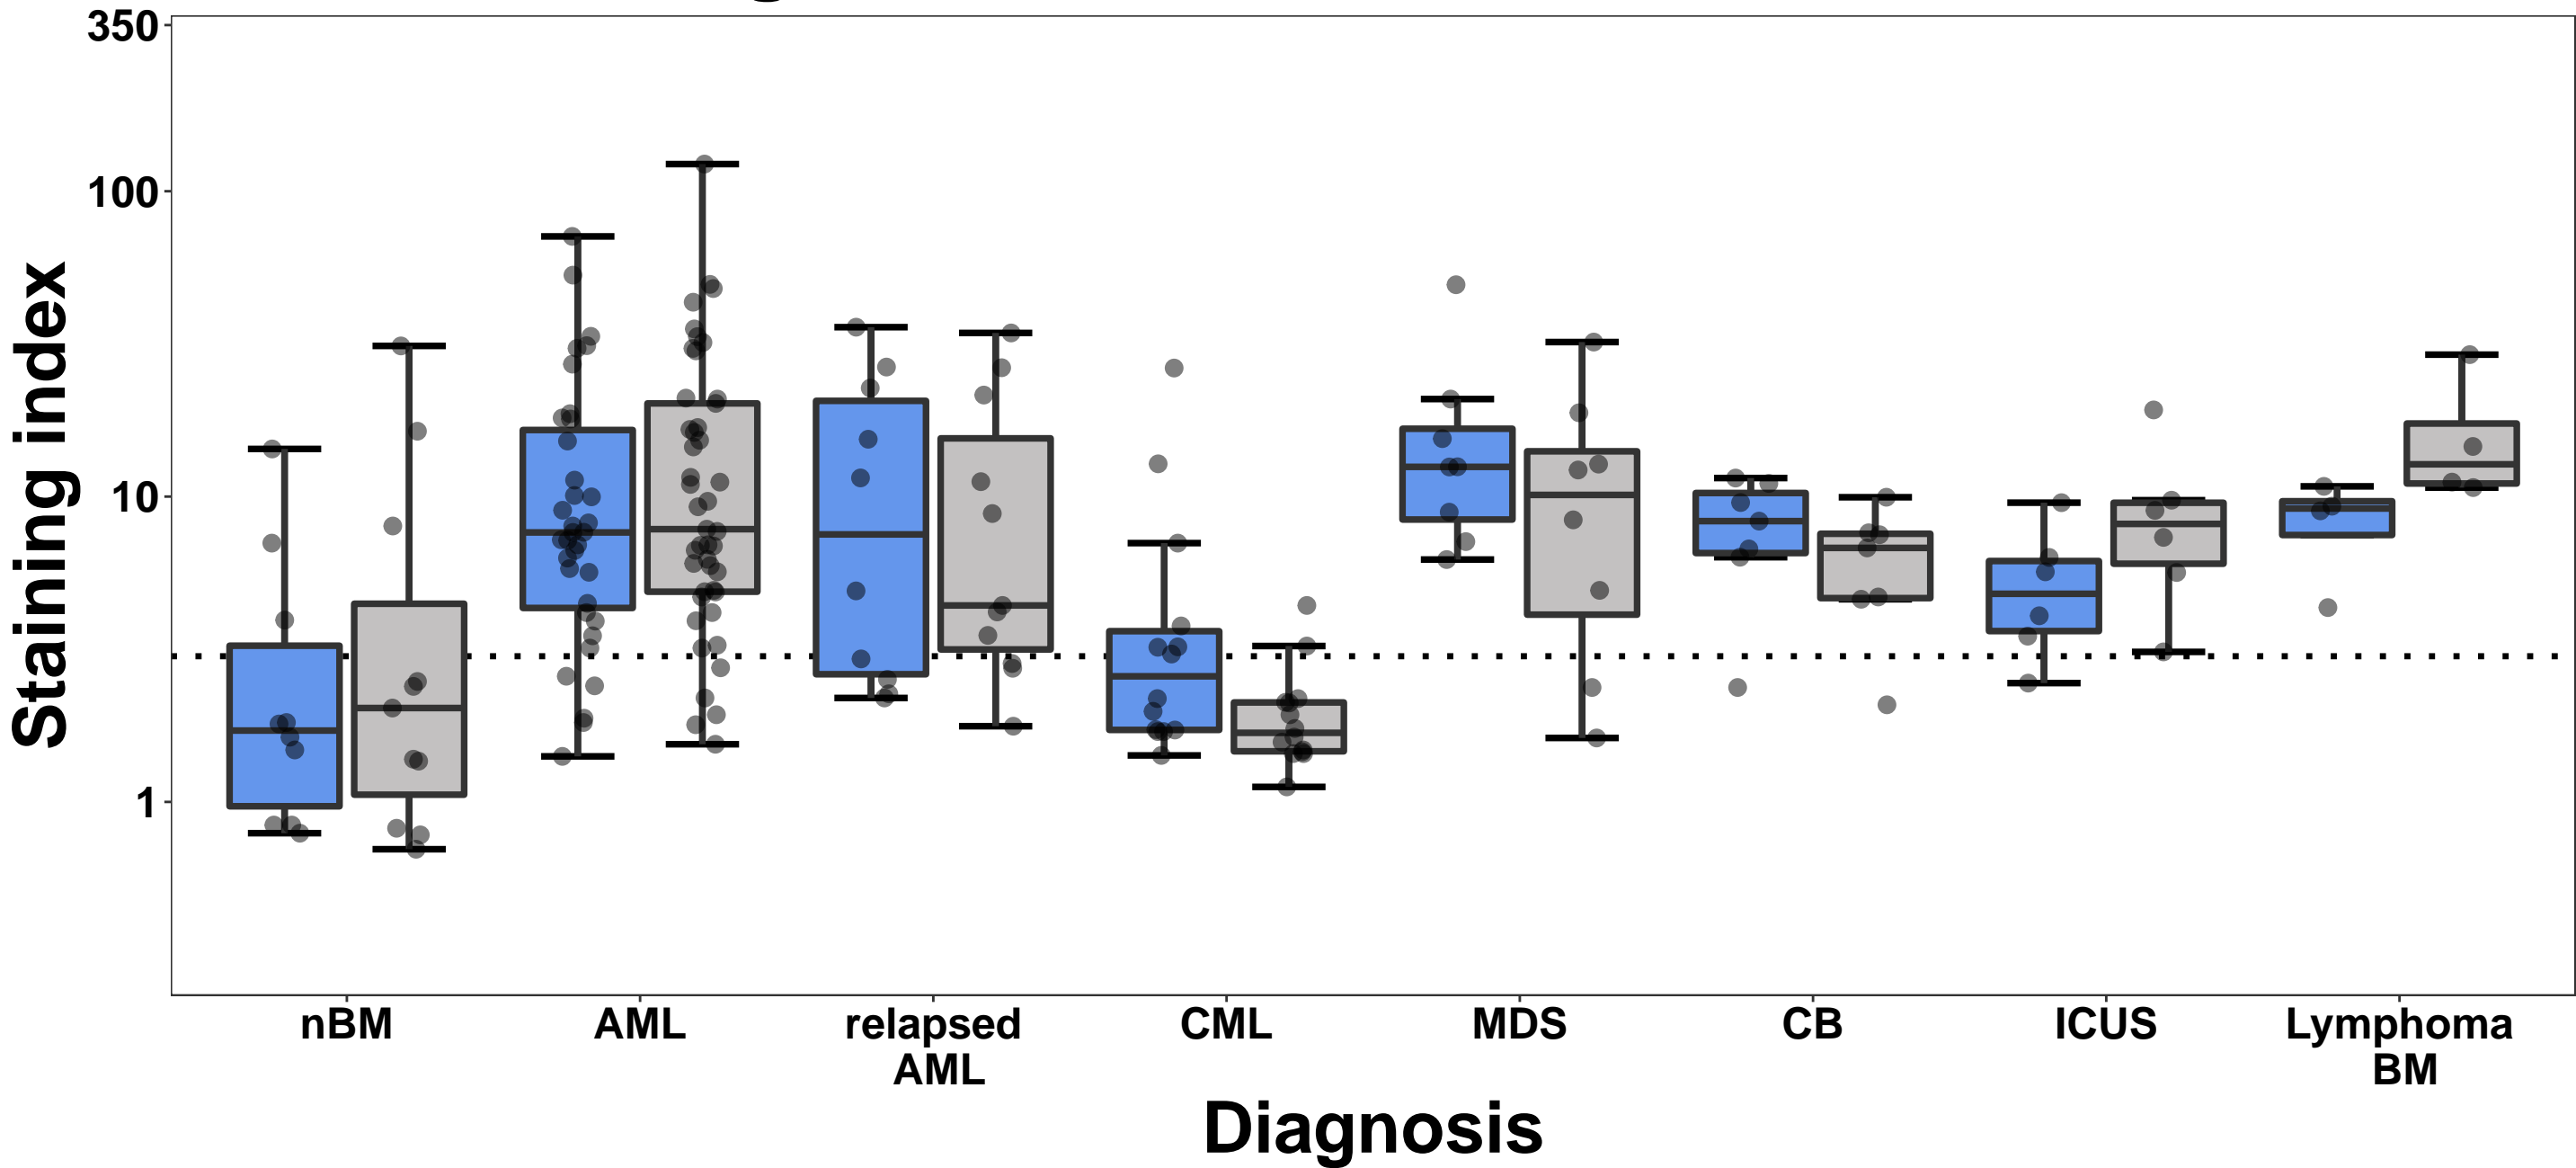

Cell fraction  CD34+/CD38-  CD34+/CD38+

# CD135 percentage

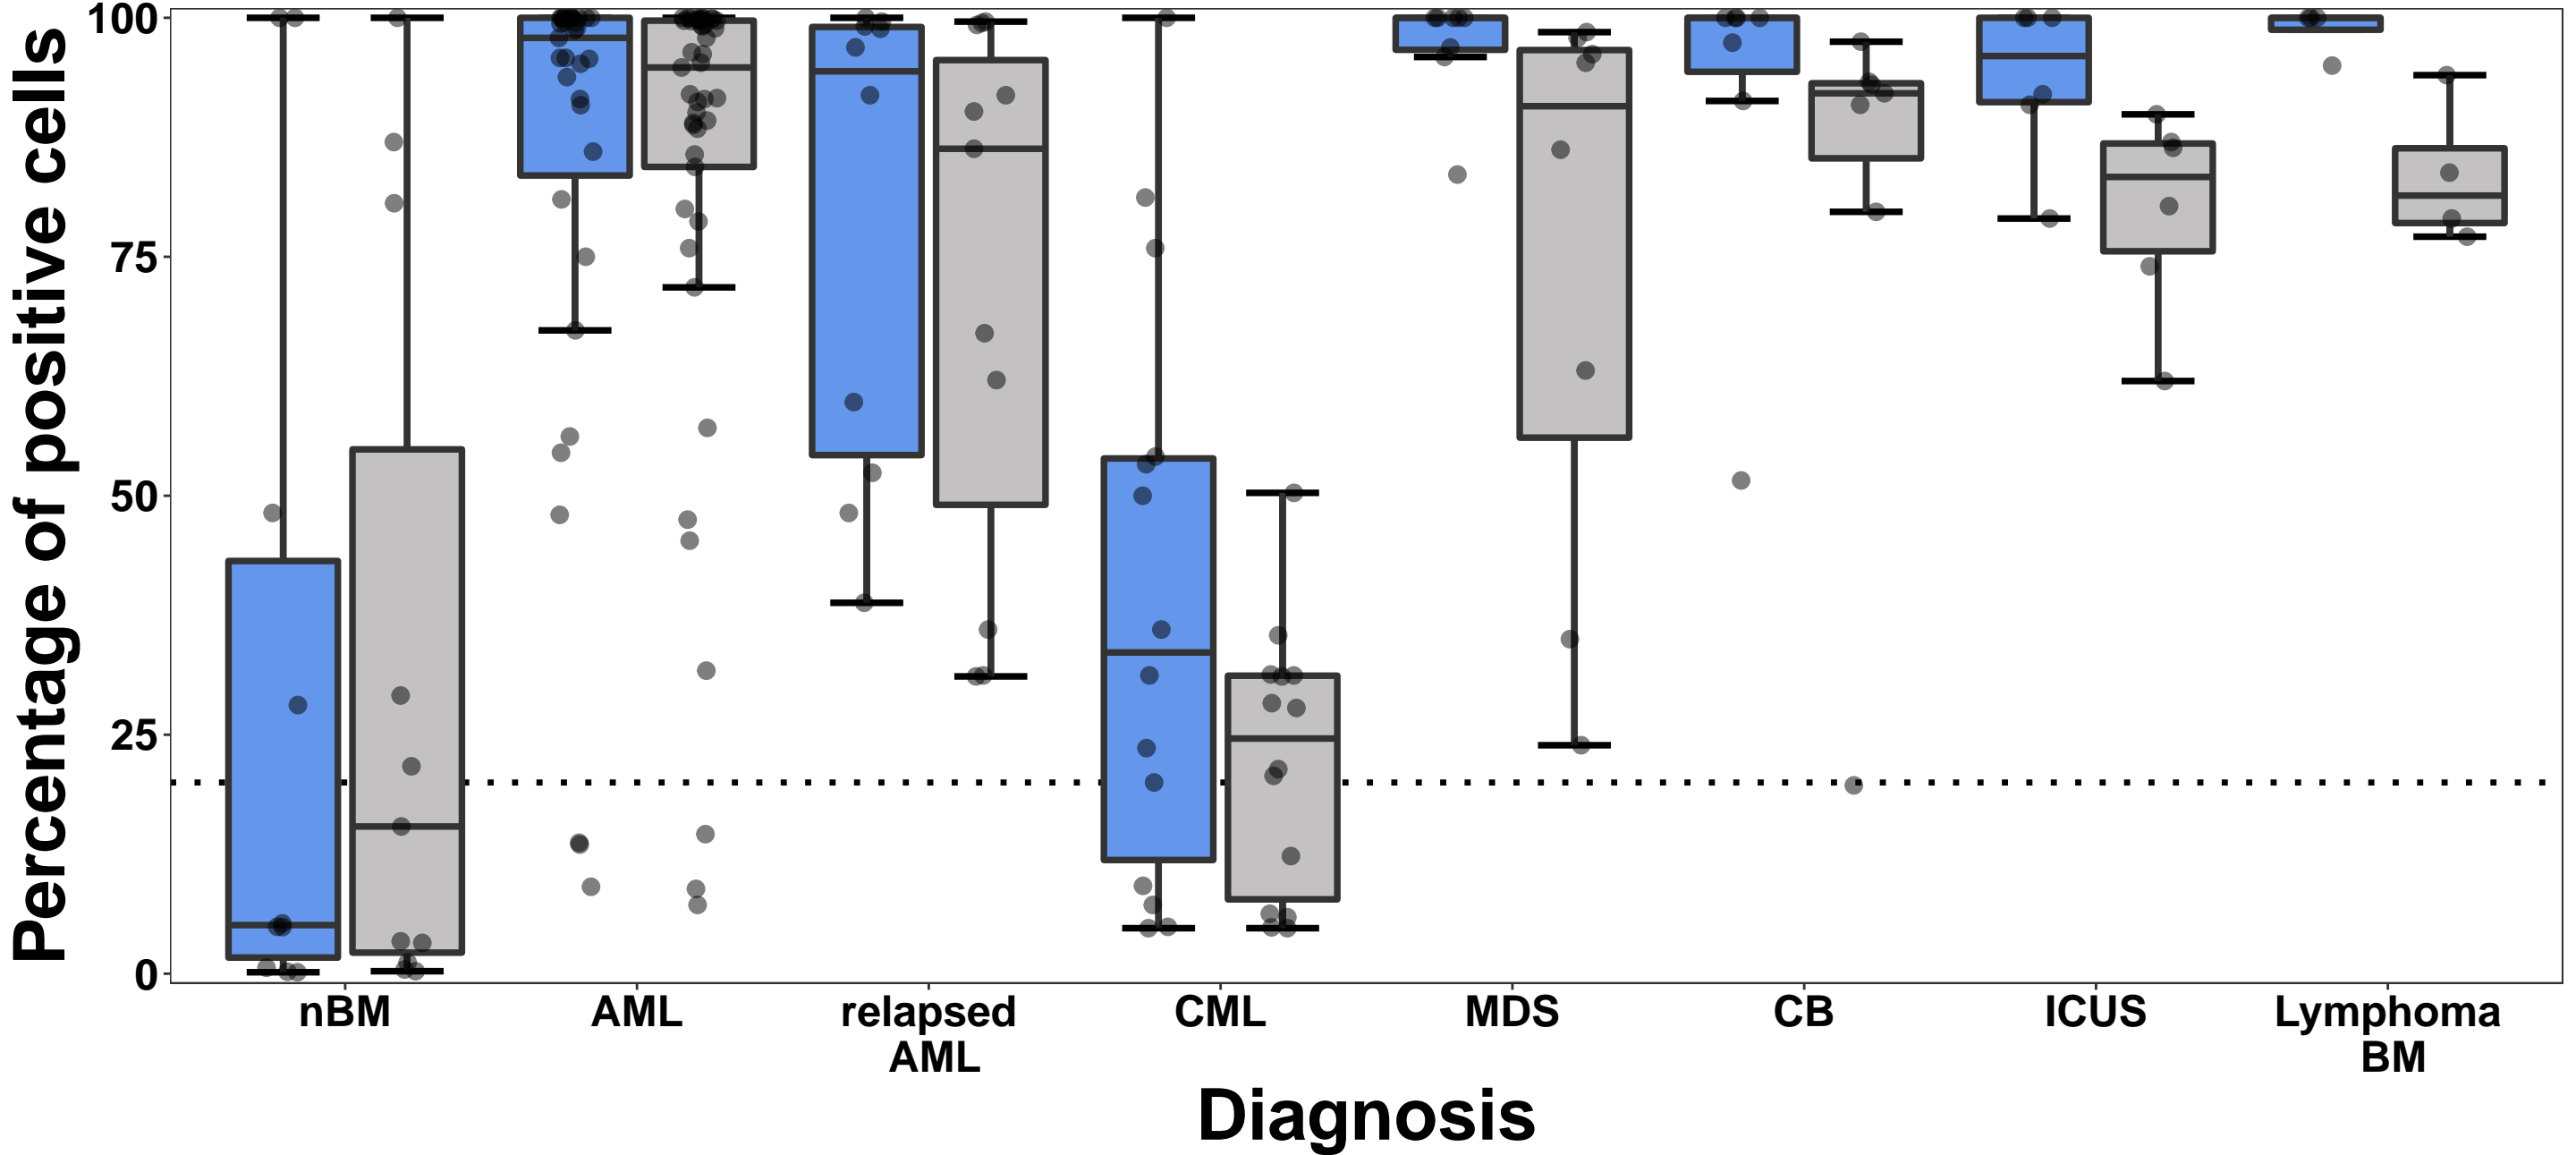

Cell fraction  CD34+/CD38-  CD34+/CD38+

# CD150 staining index

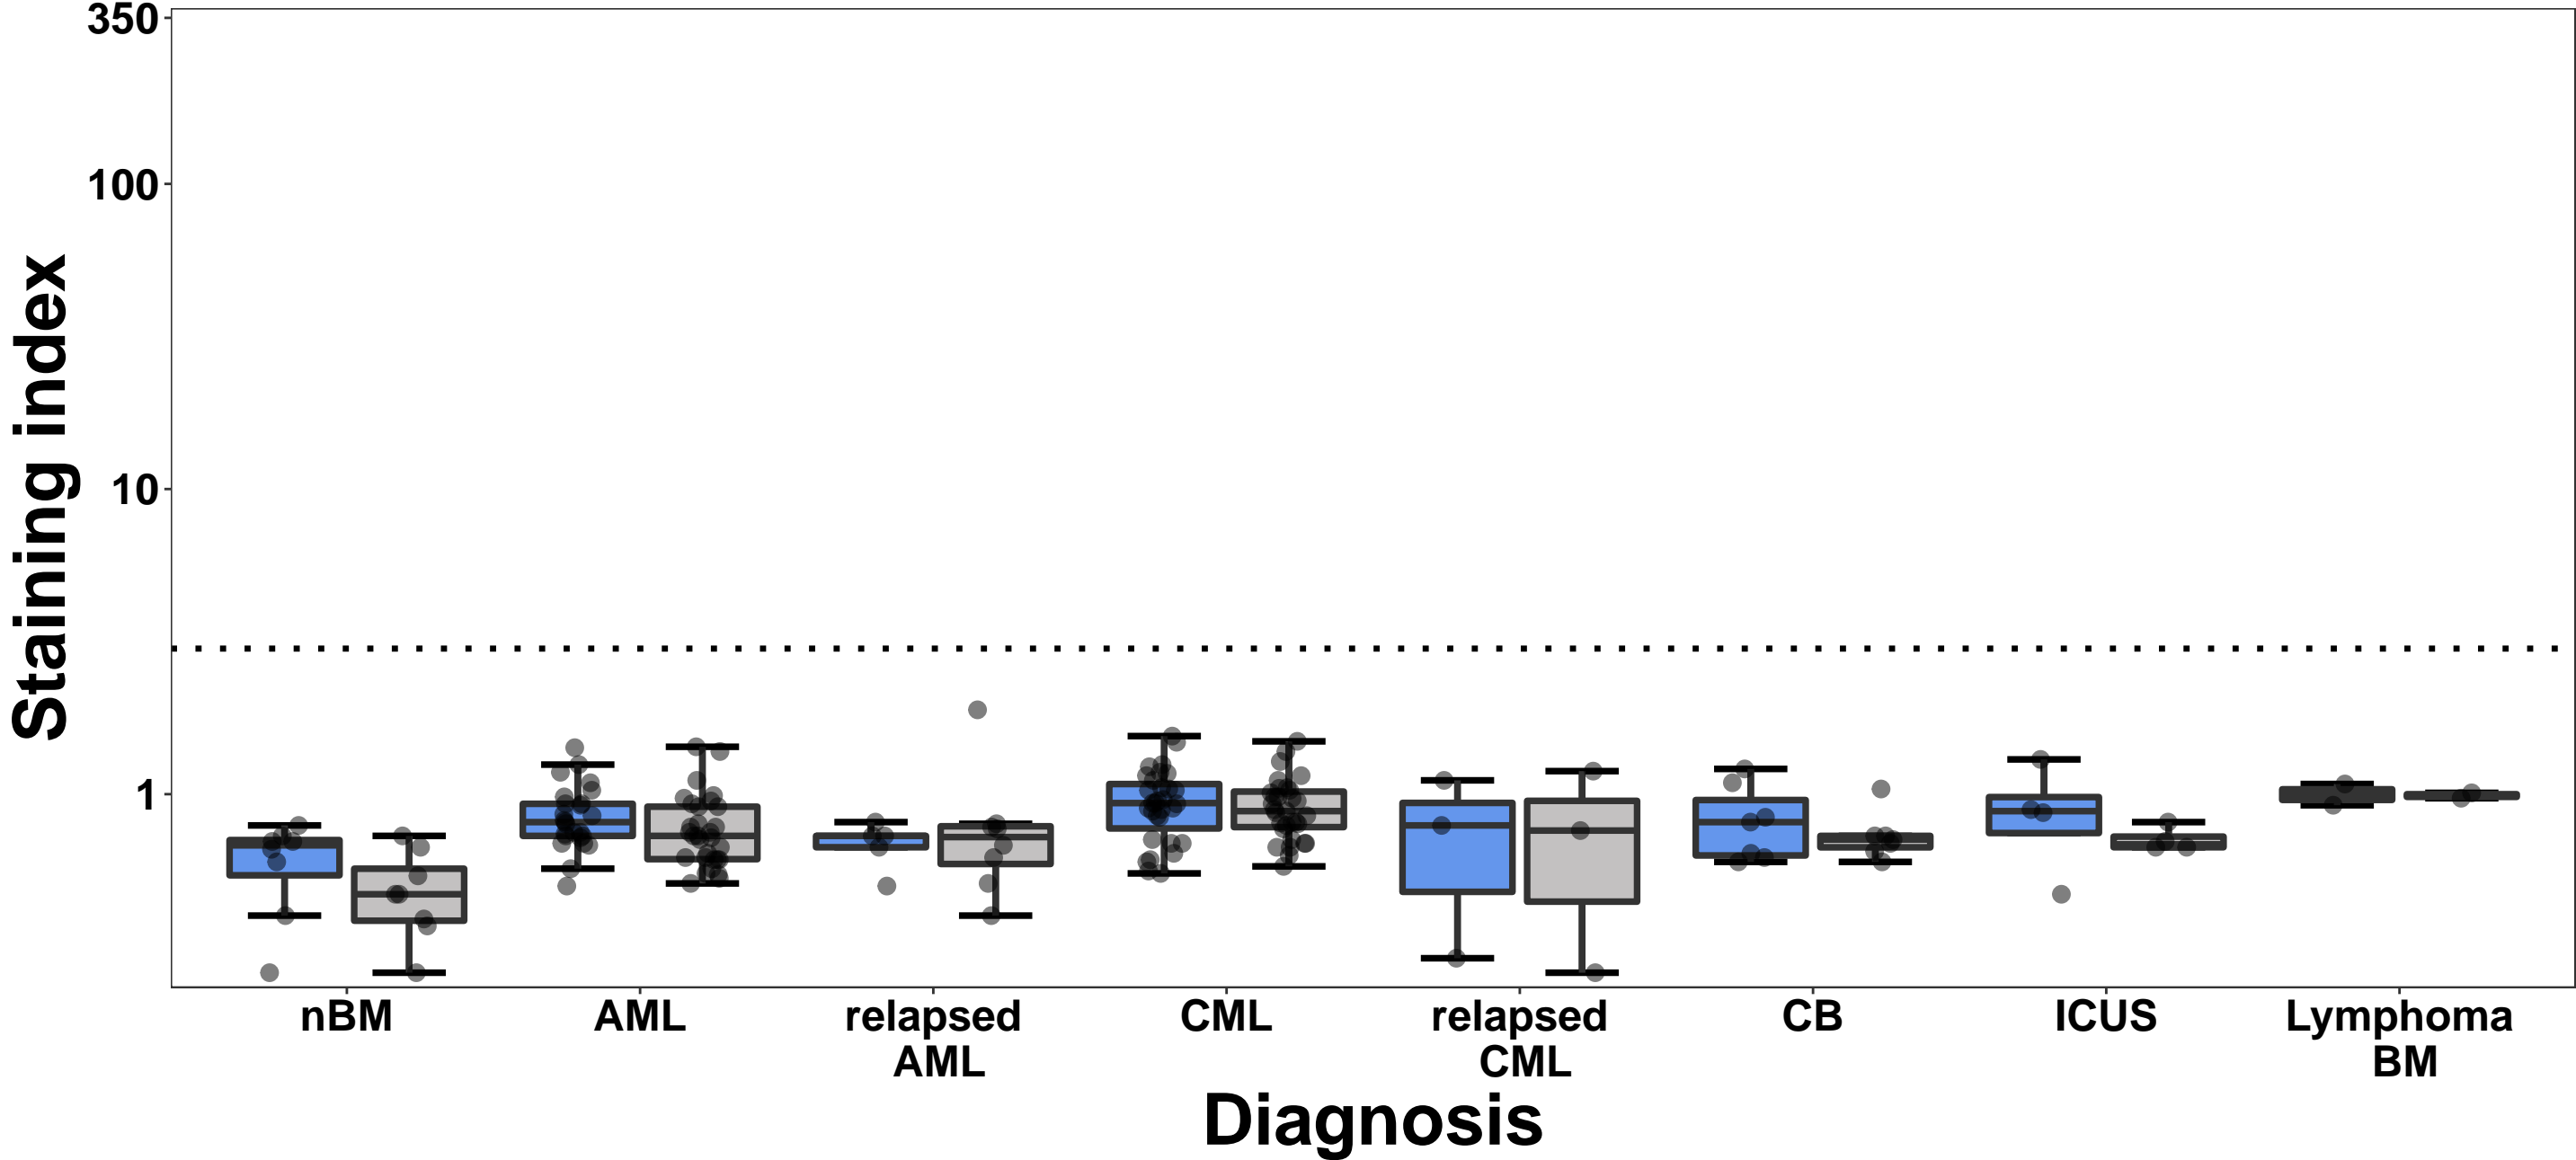

Cell fraction  CD34+/CD38-  CD34+/CD38+

# CD150 percentage

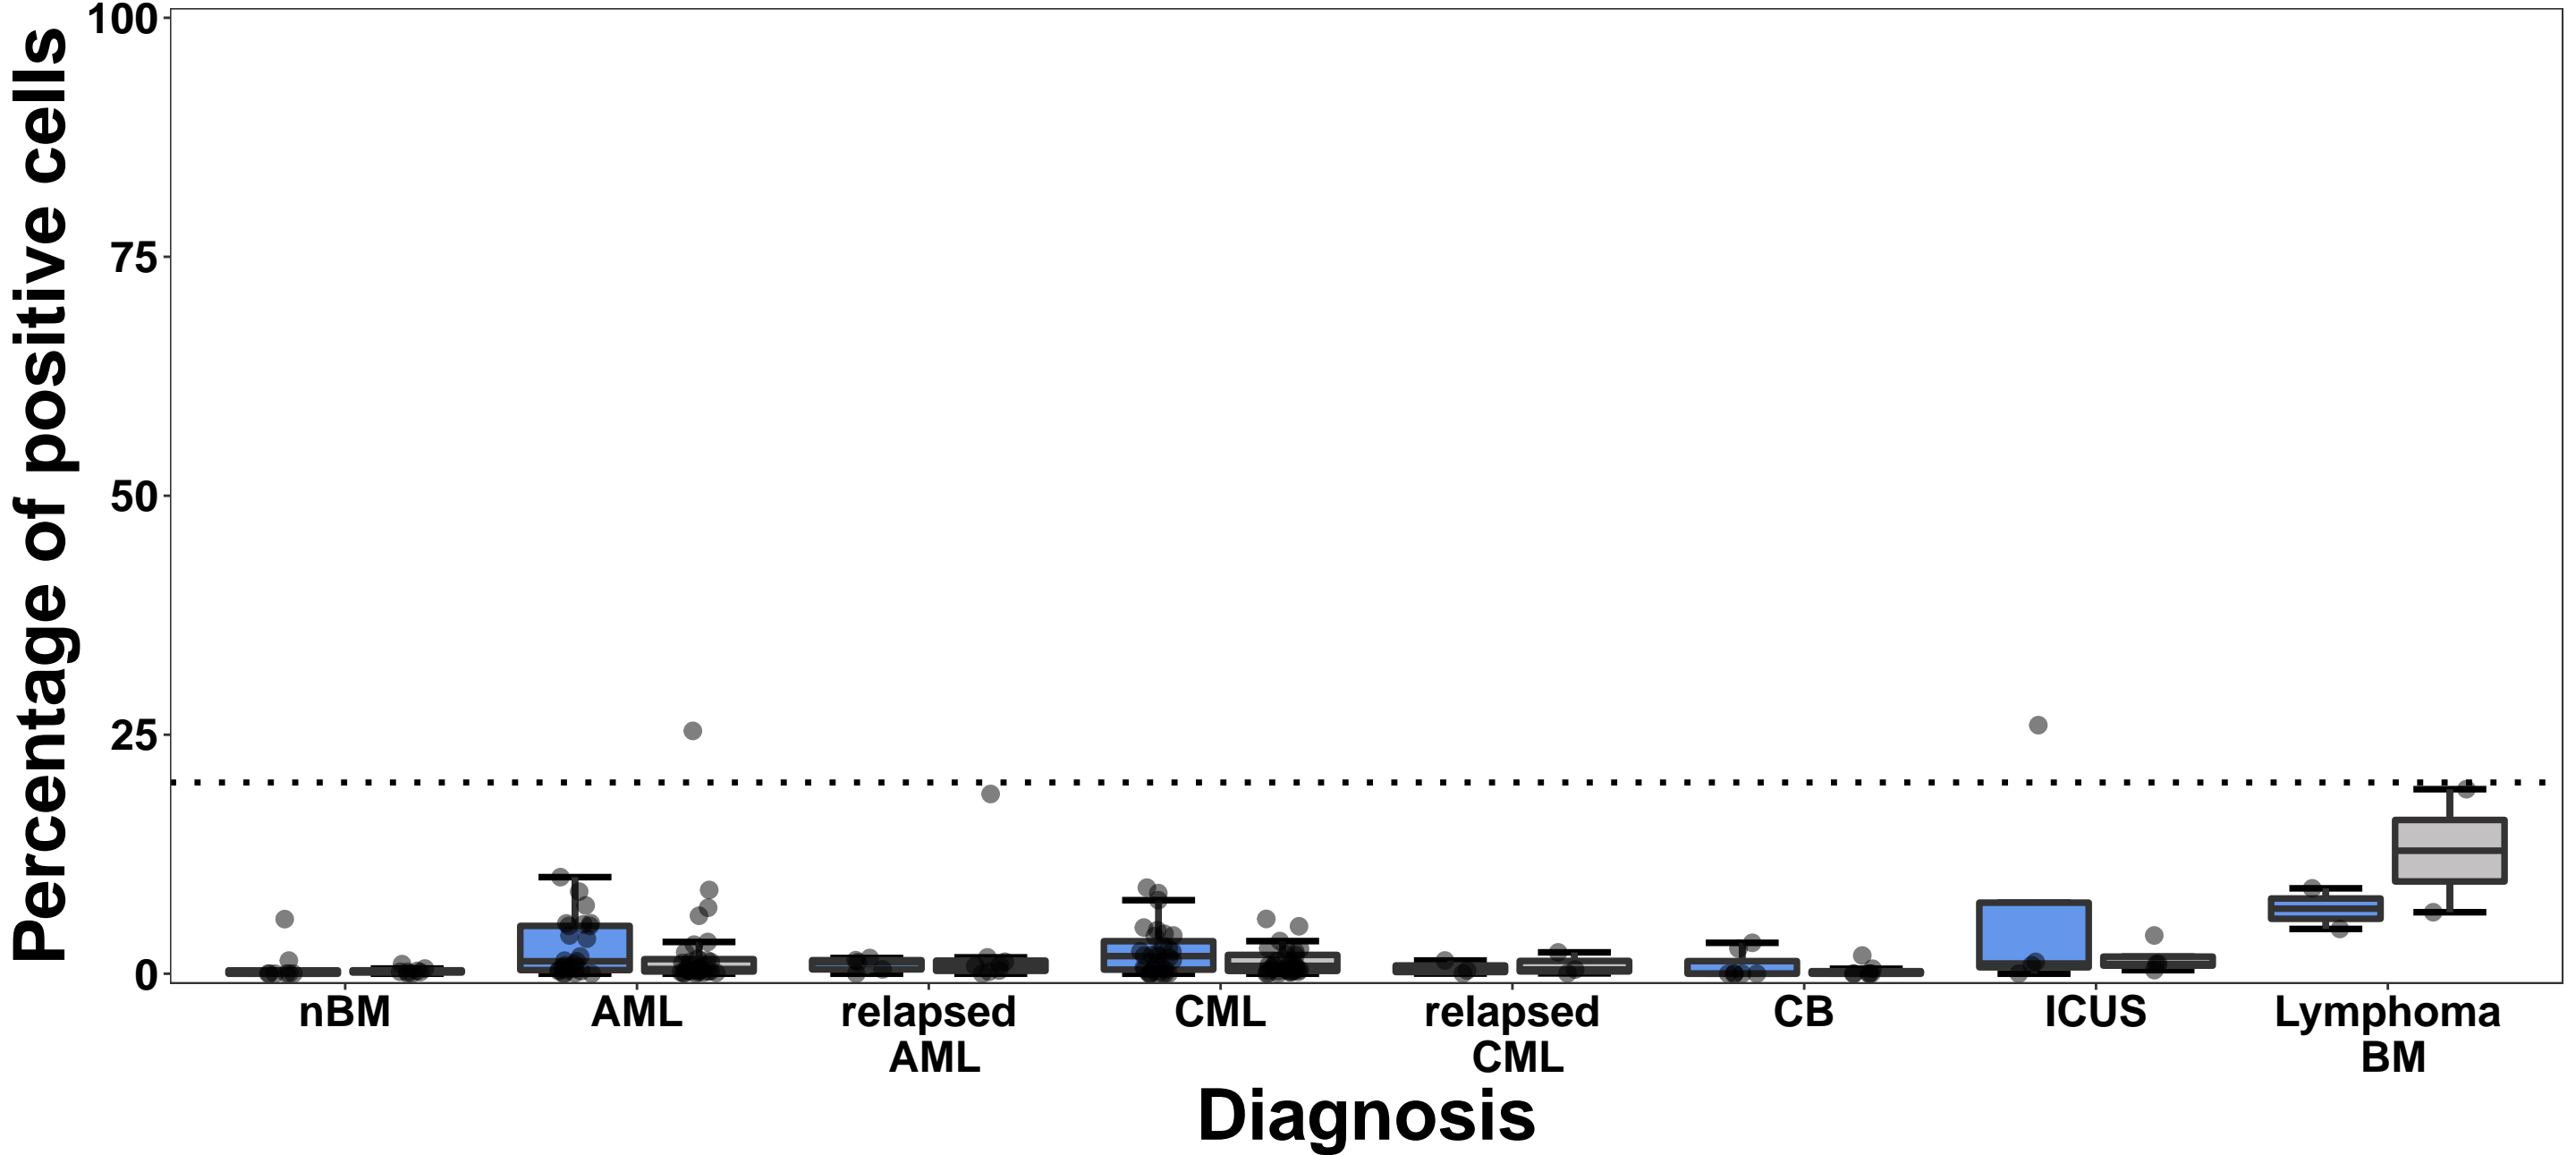

# CD151 staining index

Cell fraction  CD34+/CD38-  CD34+/CD38+

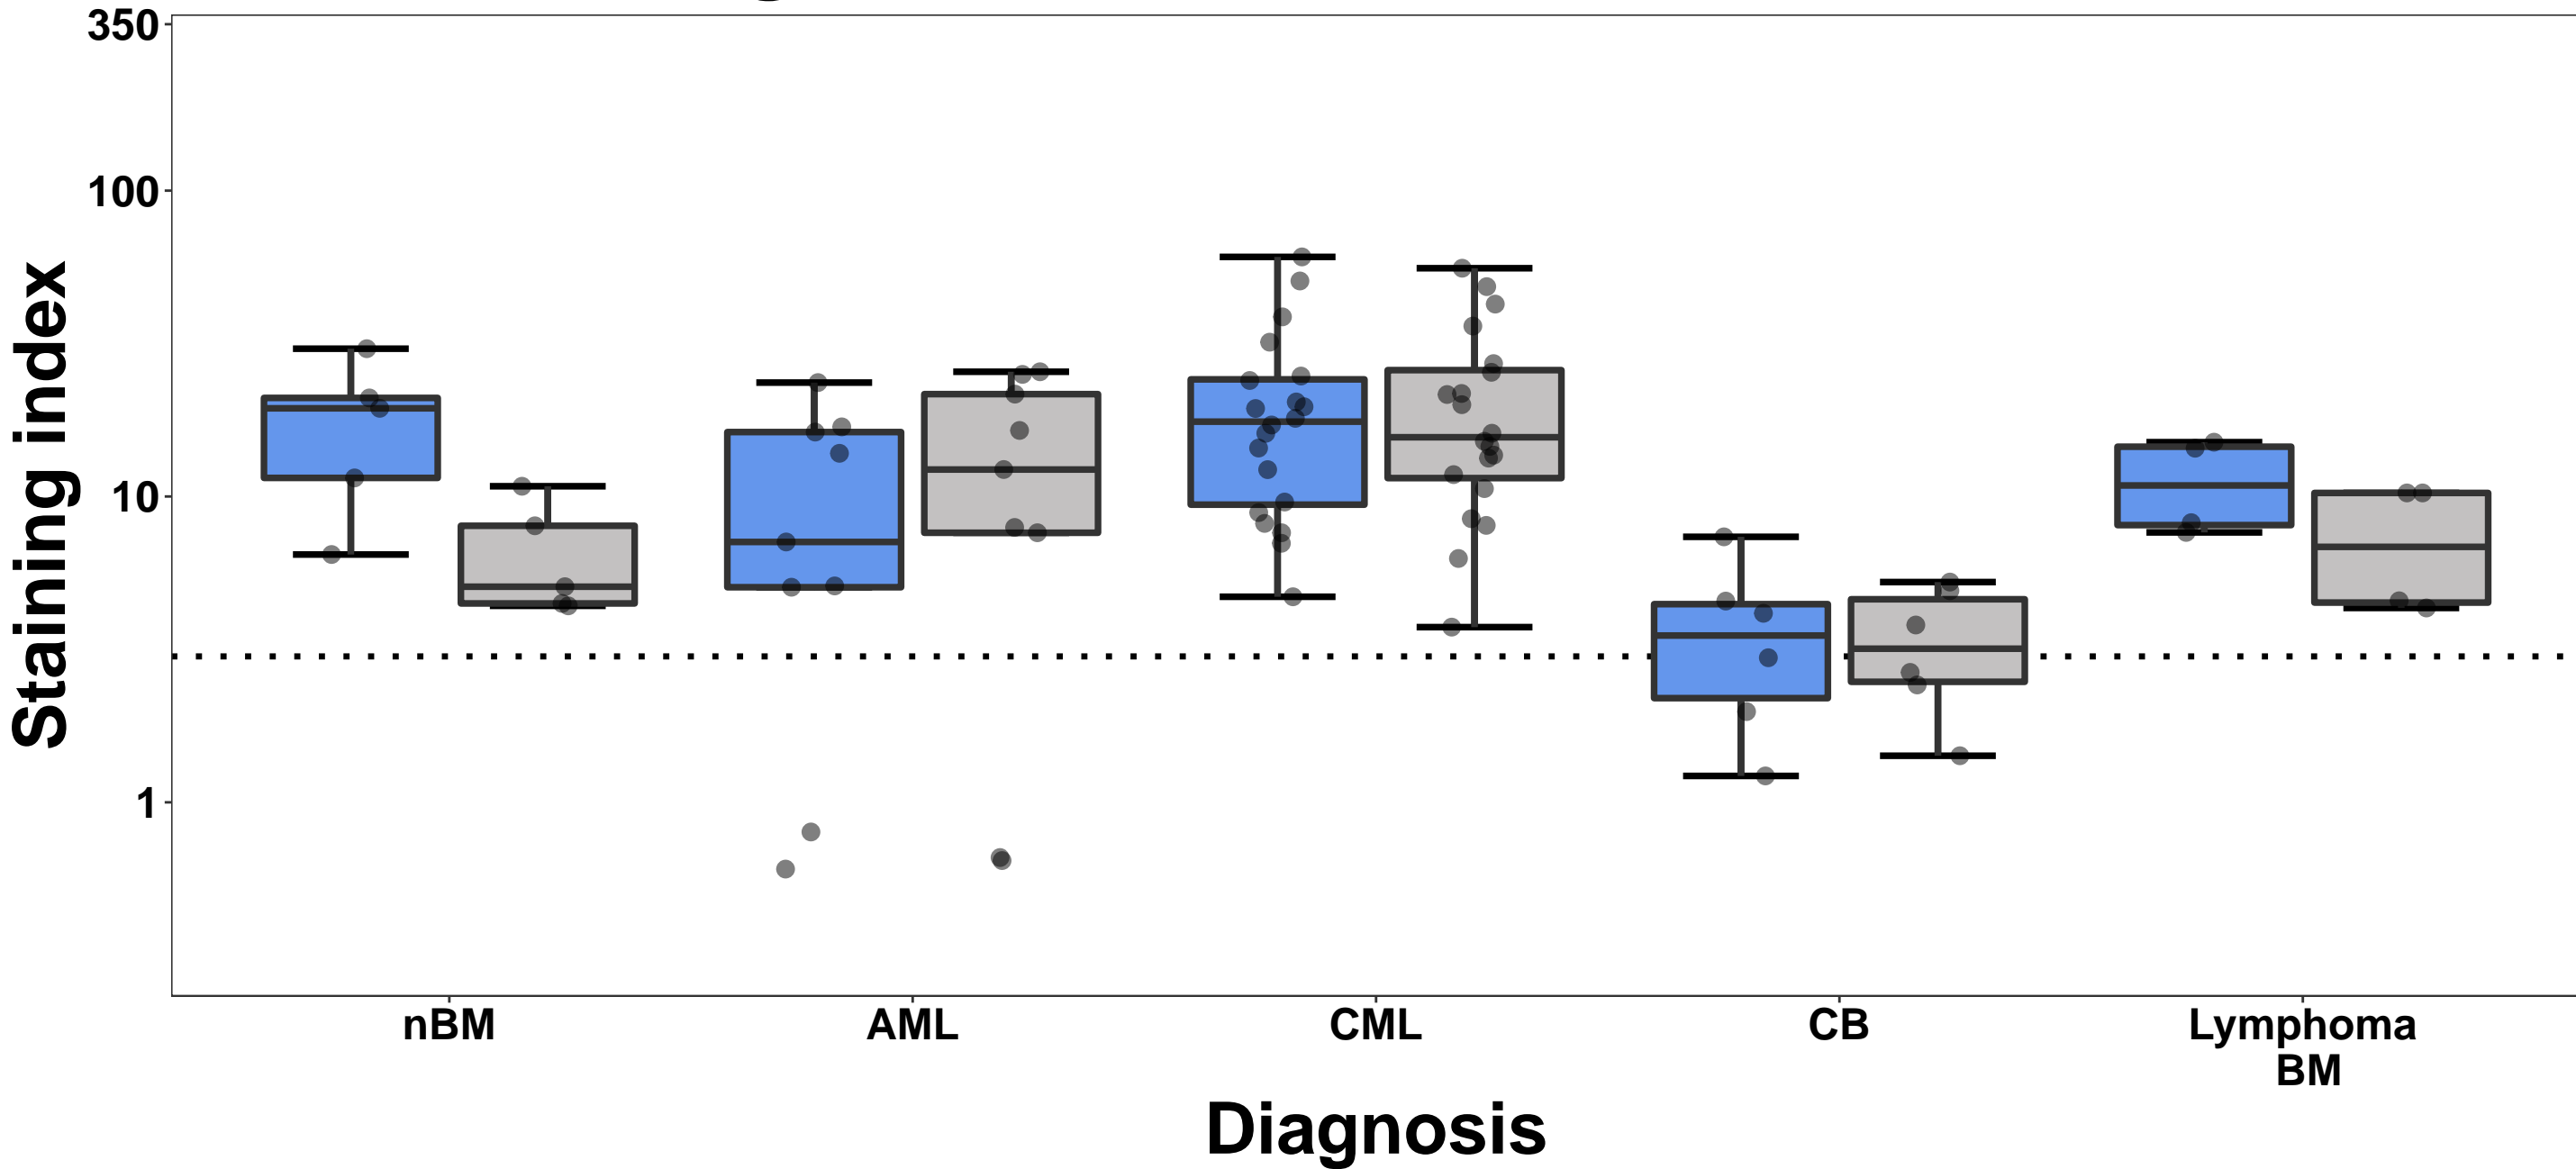



Cell fraction  CD34+/CD38-  CD34+/CD38+

# CD151 percentage

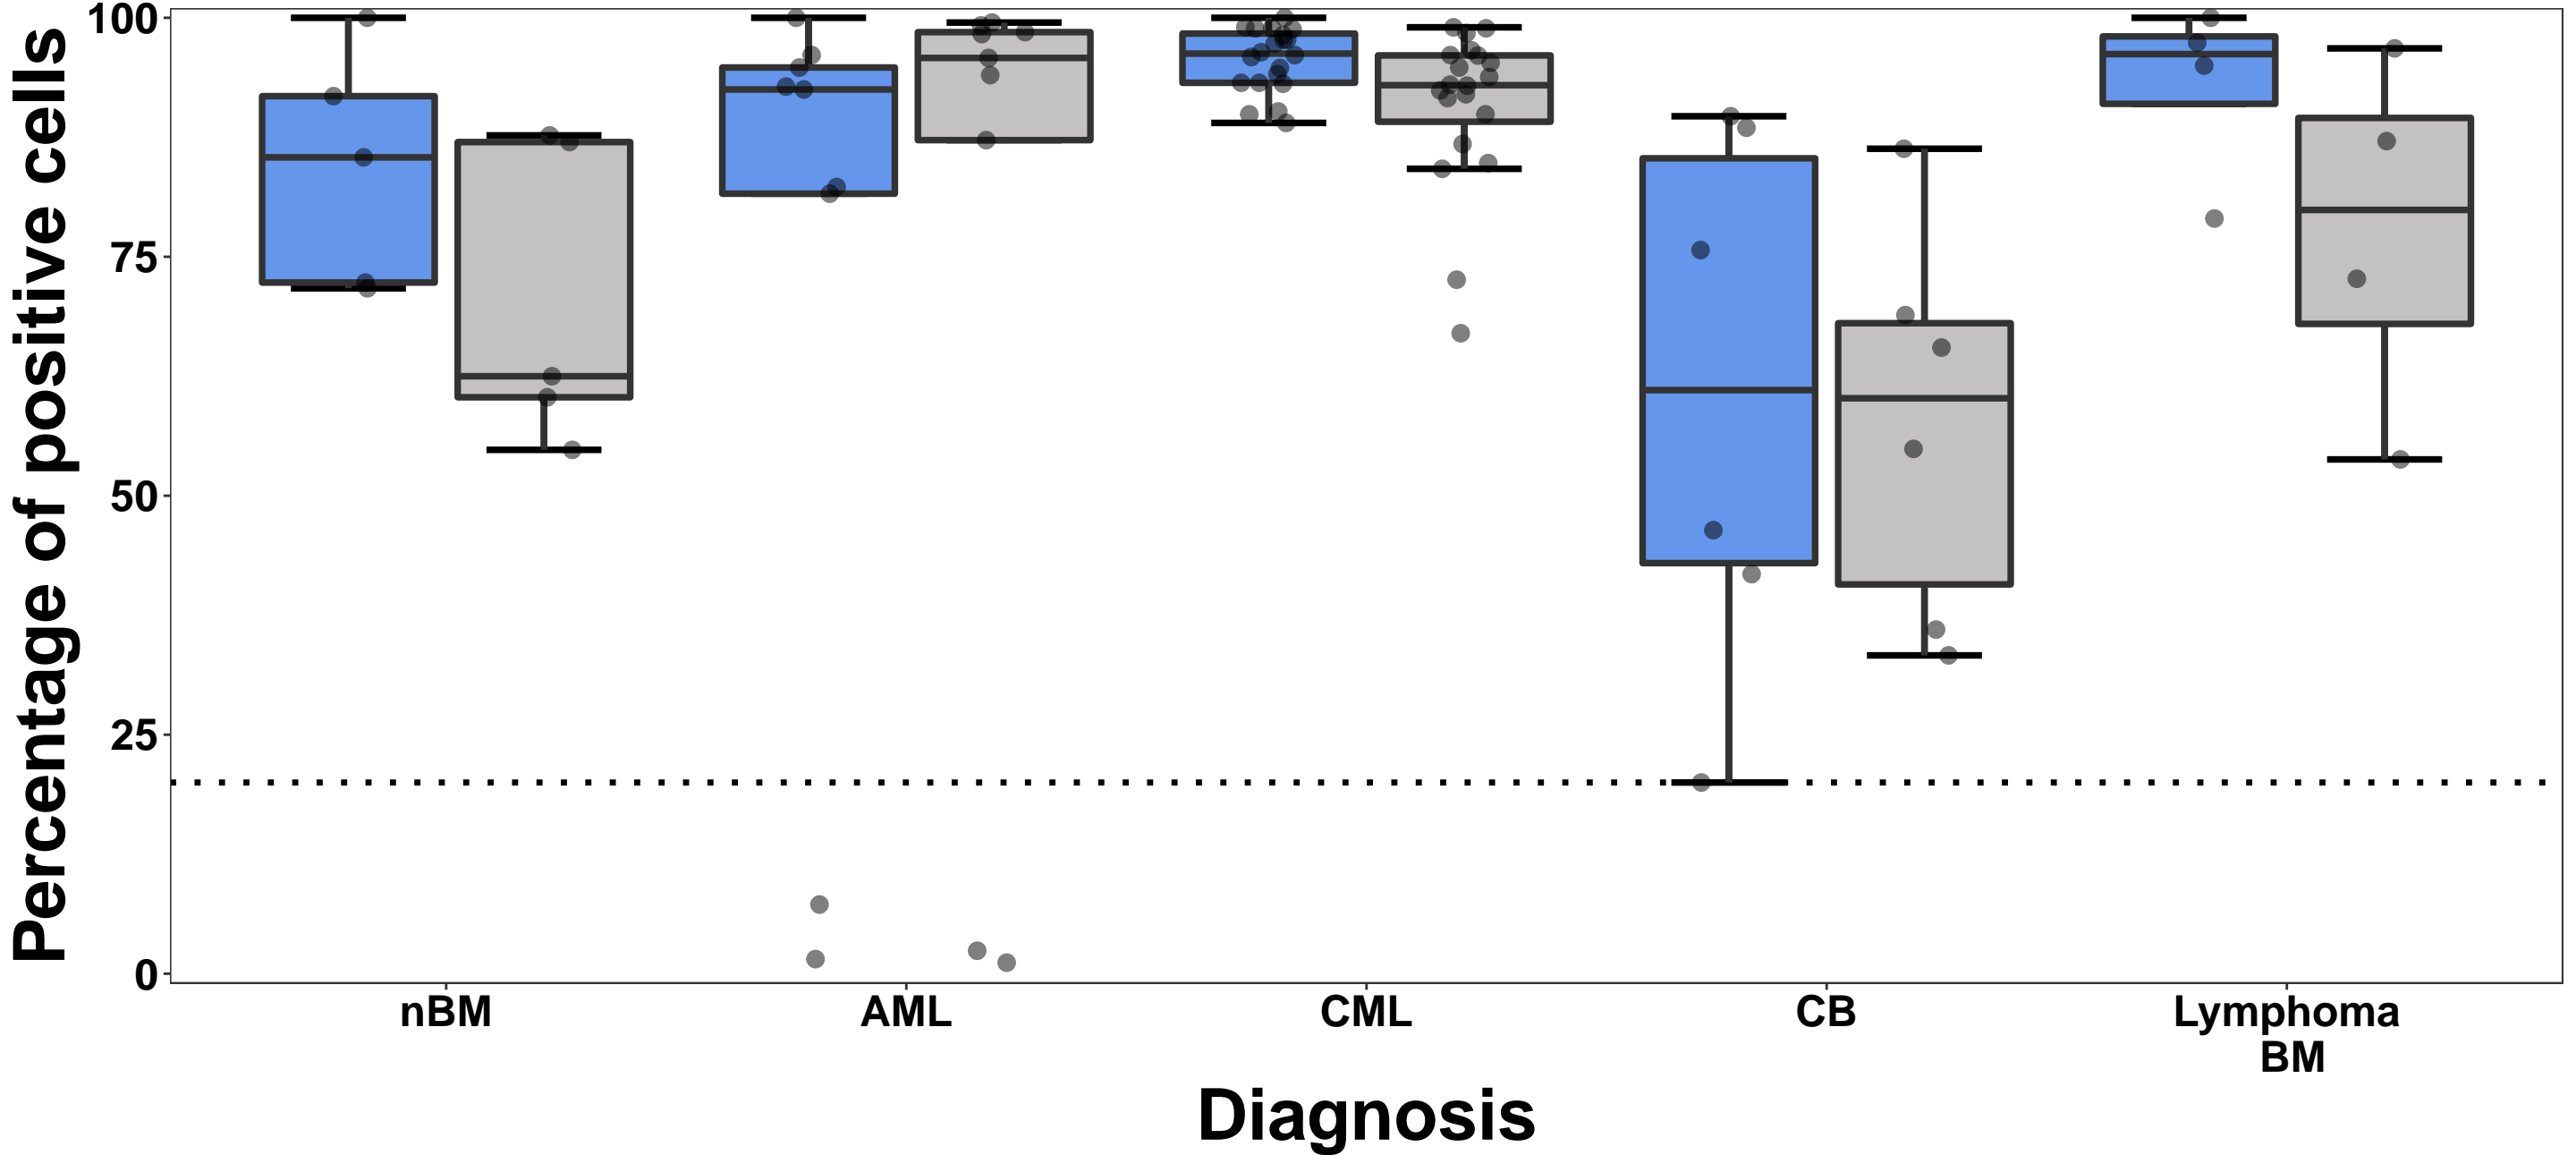

Cell fraction  CD34+/CD38-  CD34+/CD38+

# CD157 staining index

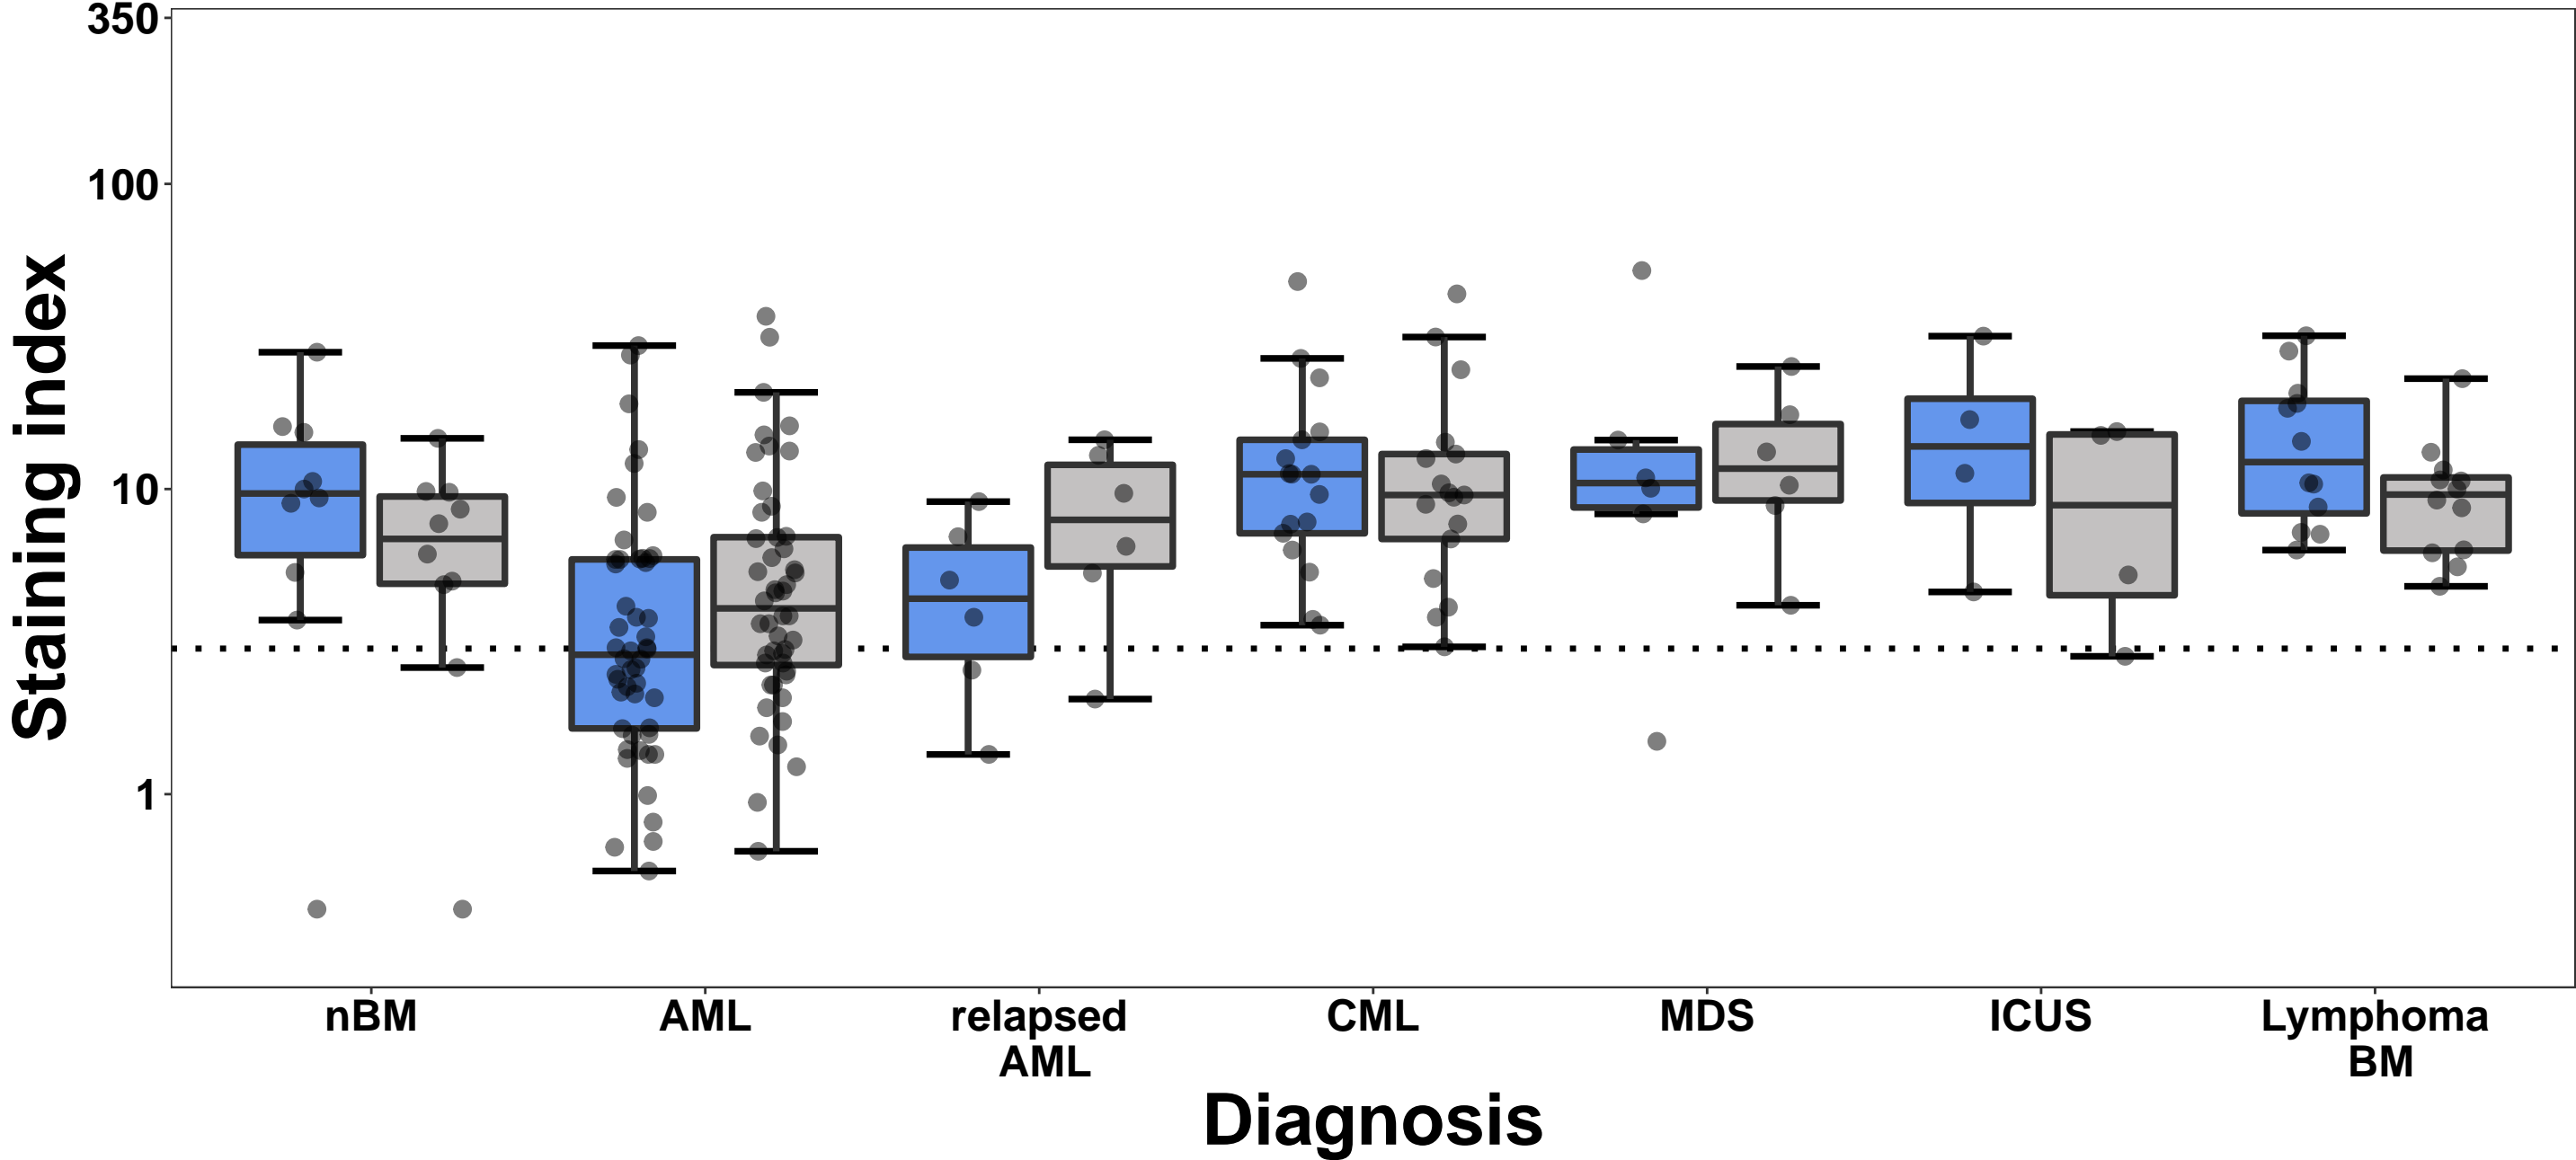

Cell fraction  CD34+/CD38-  CD34+/CD38+

# CD157 percentage

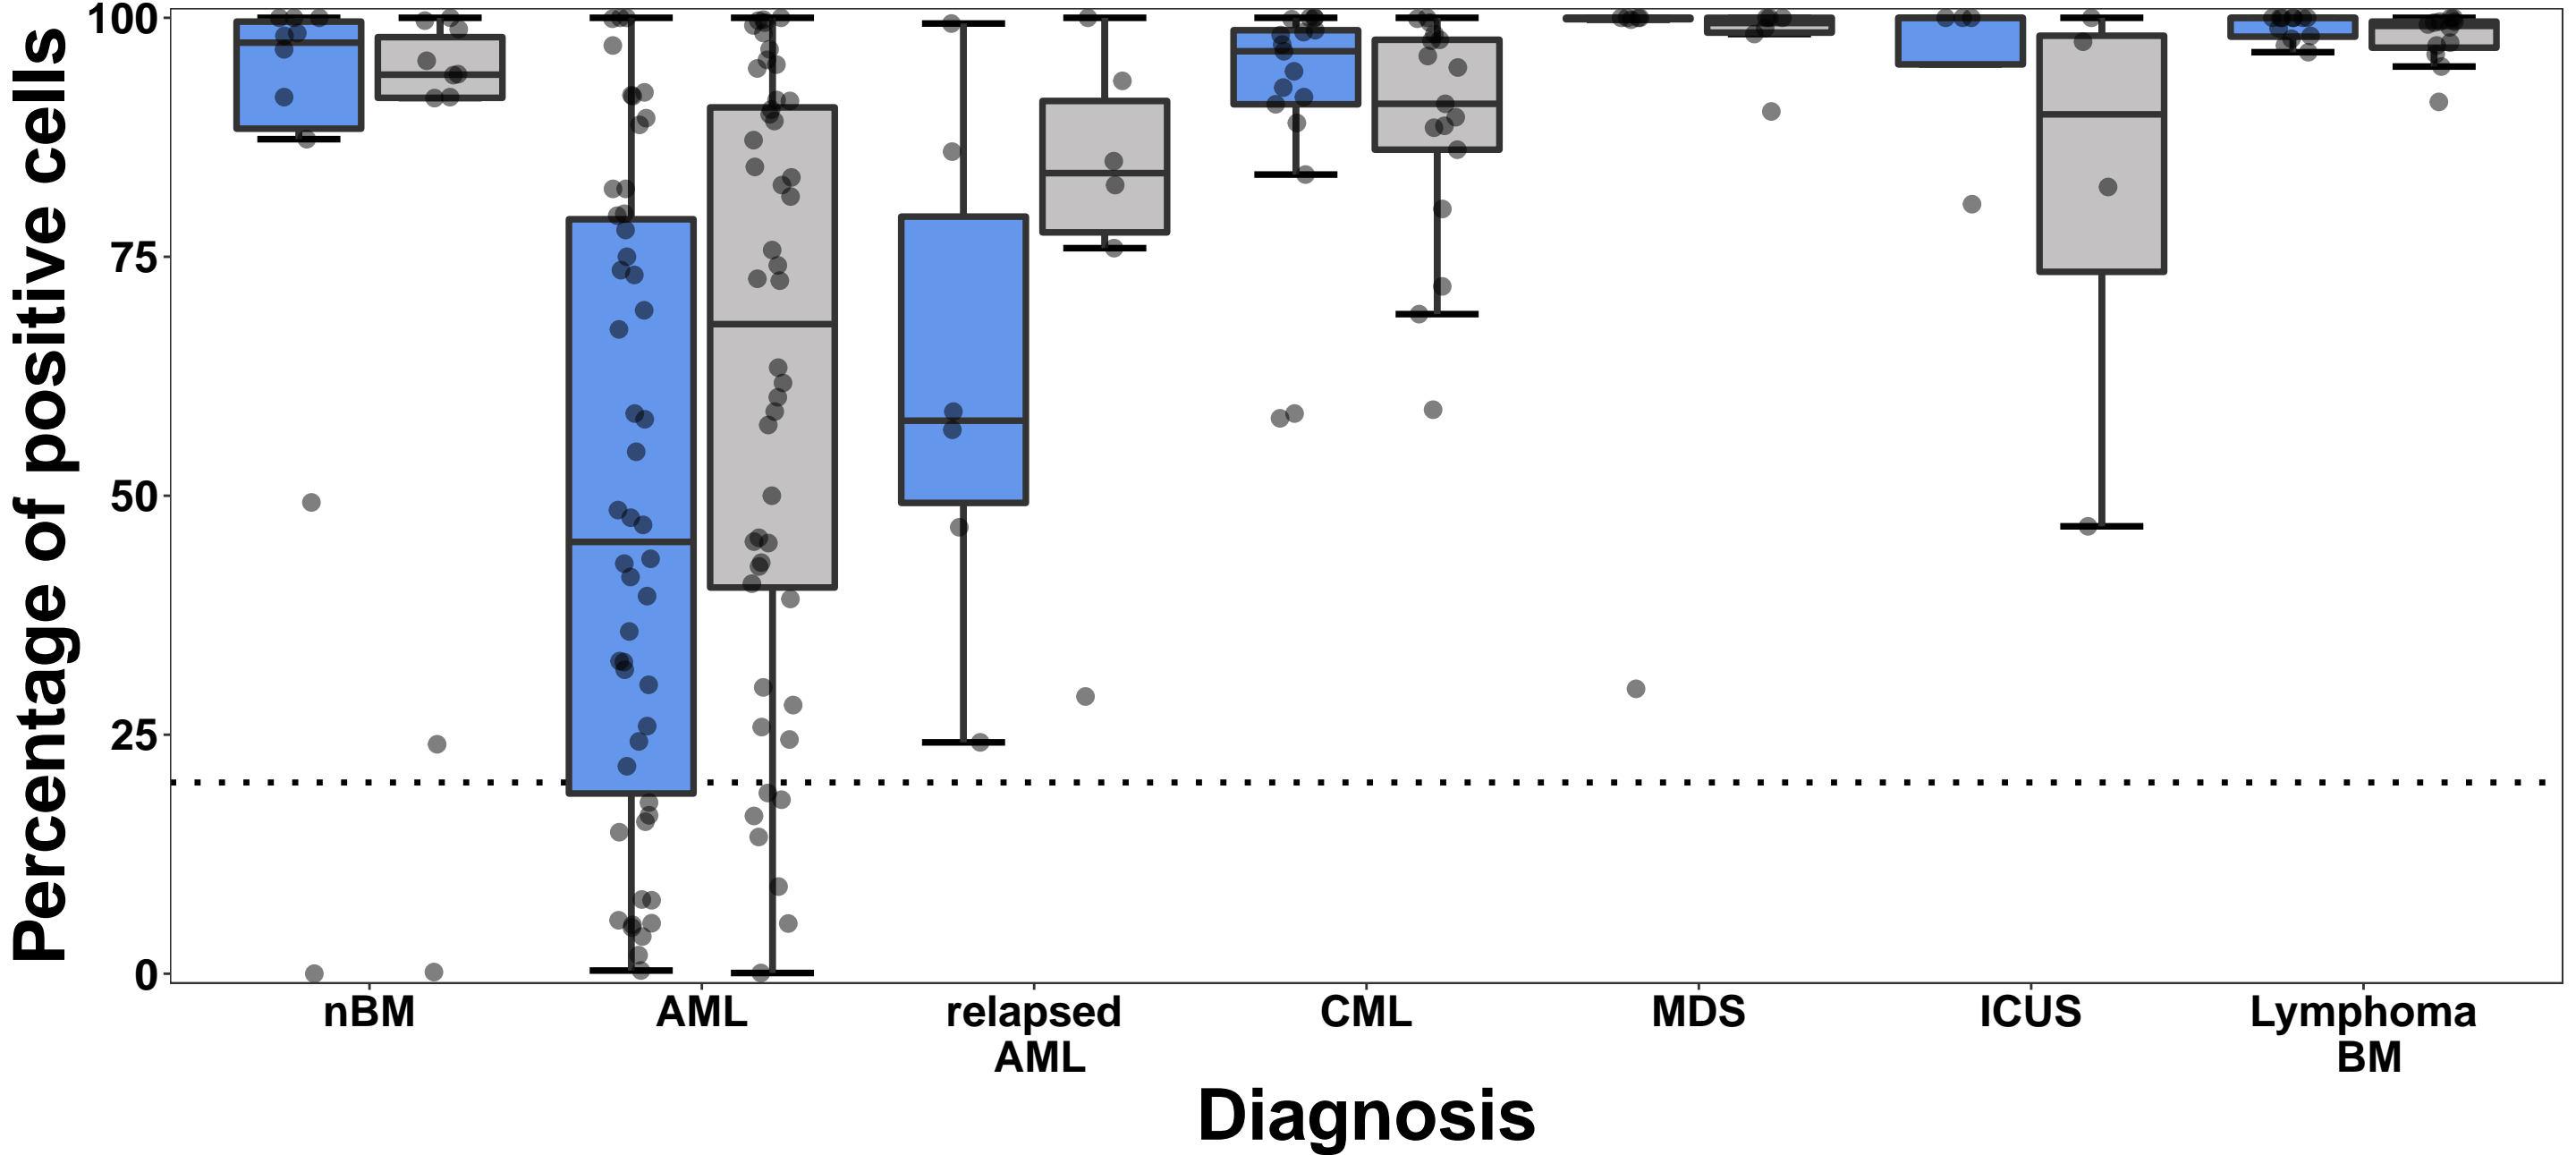

Cell fraction  CD34+/CD38-  CD34+/CD38+

# CD162 staining index

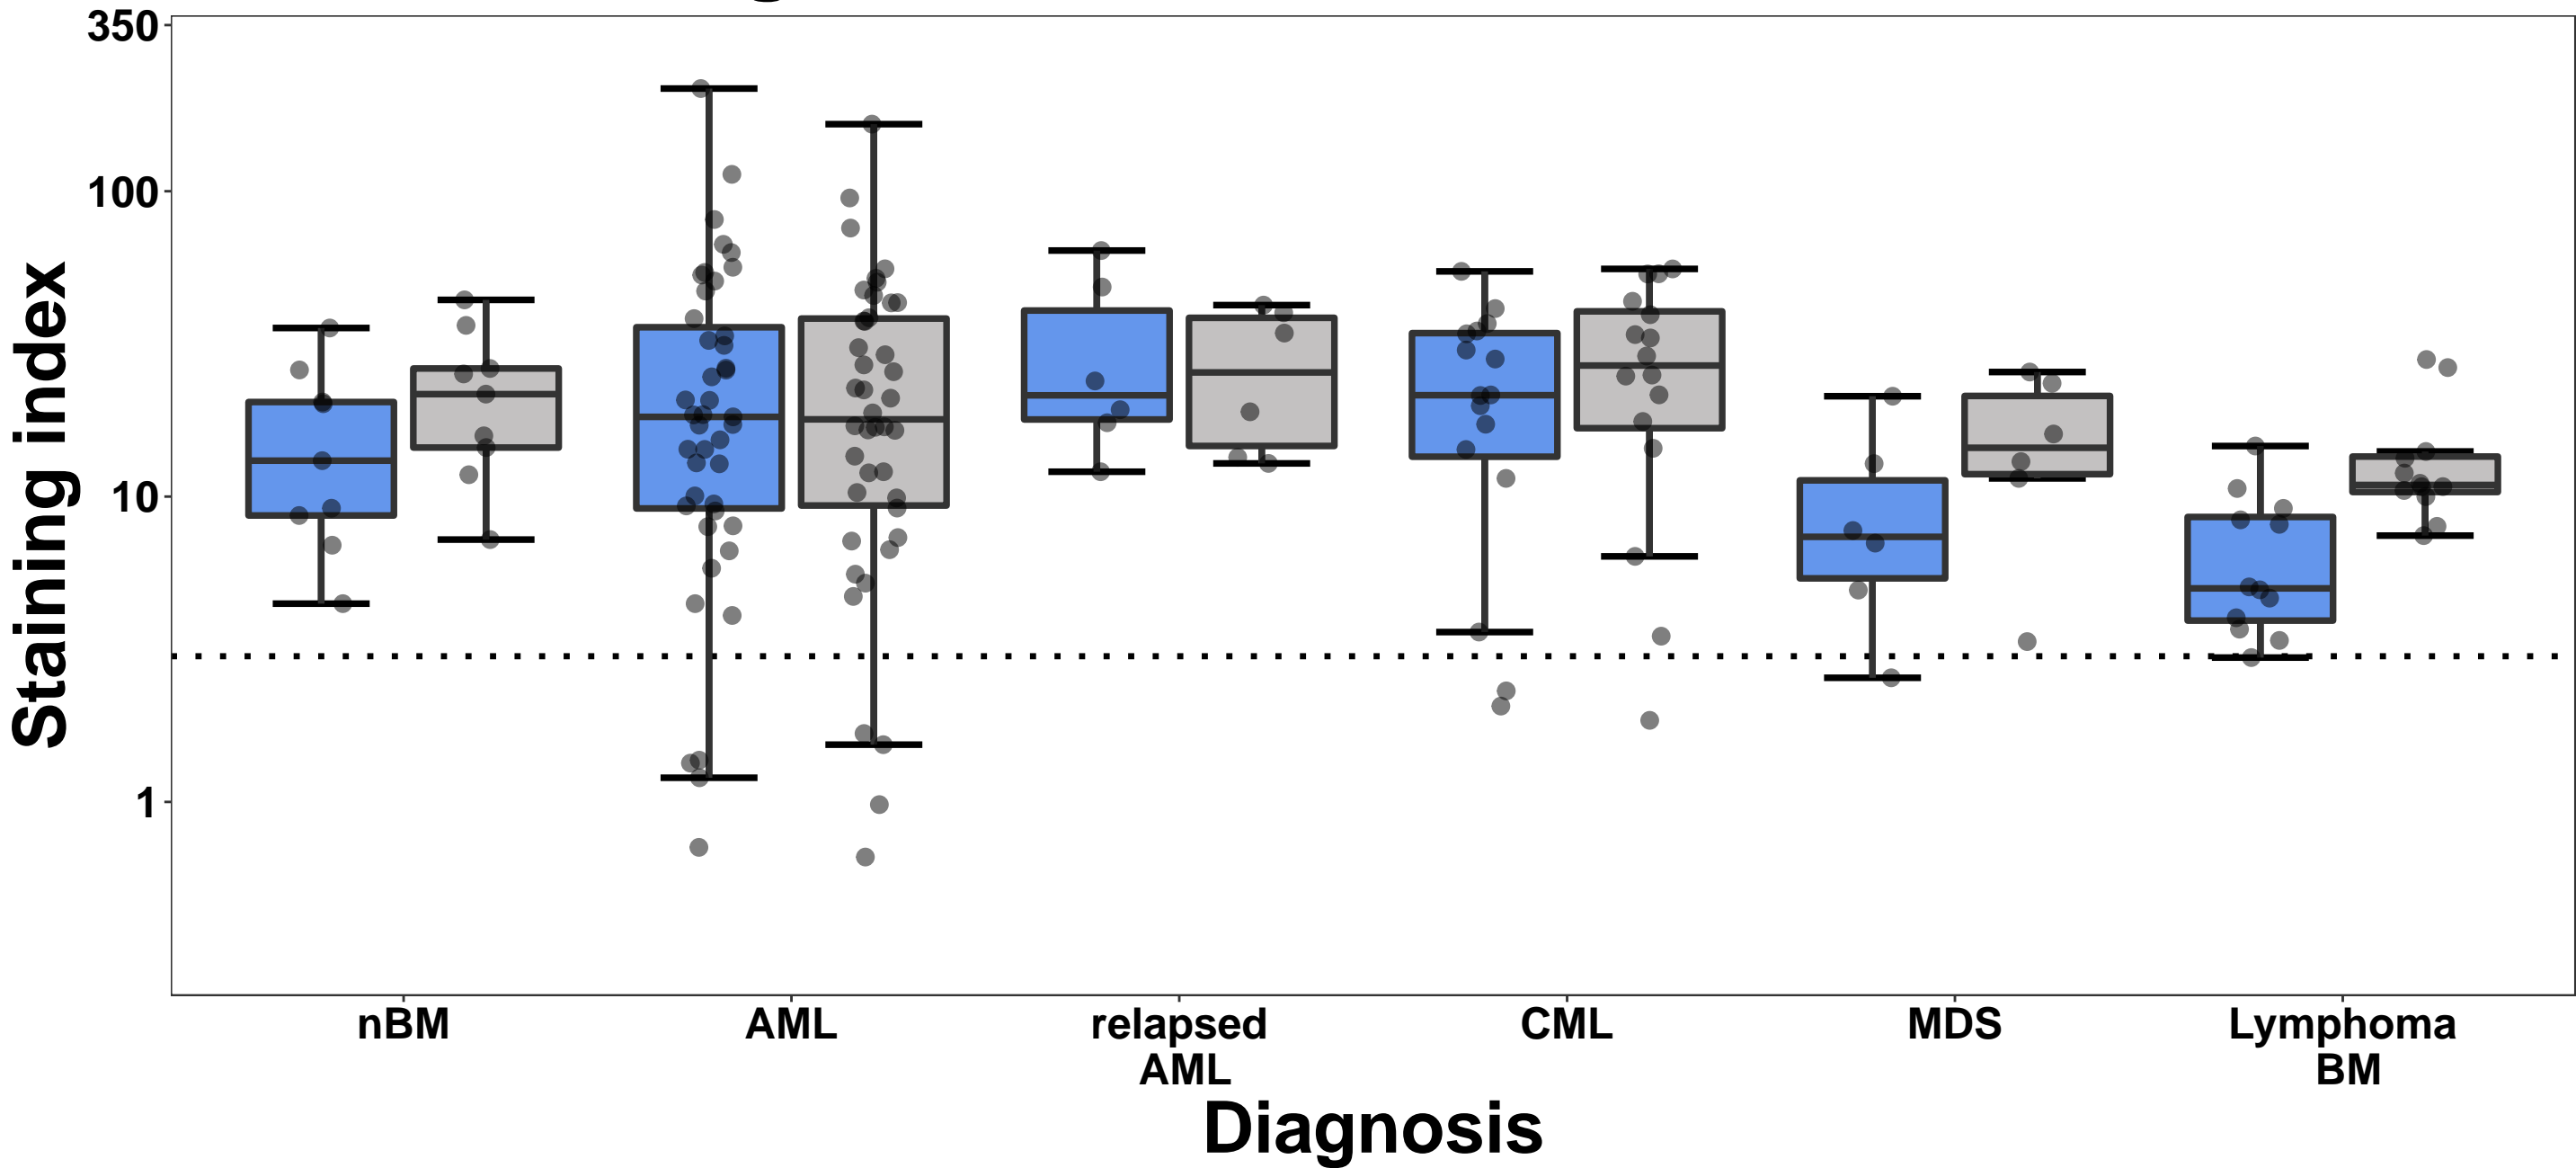

Cell fraction  CD34+/CD38-  CD34+/CD38+

# CD162 percentage

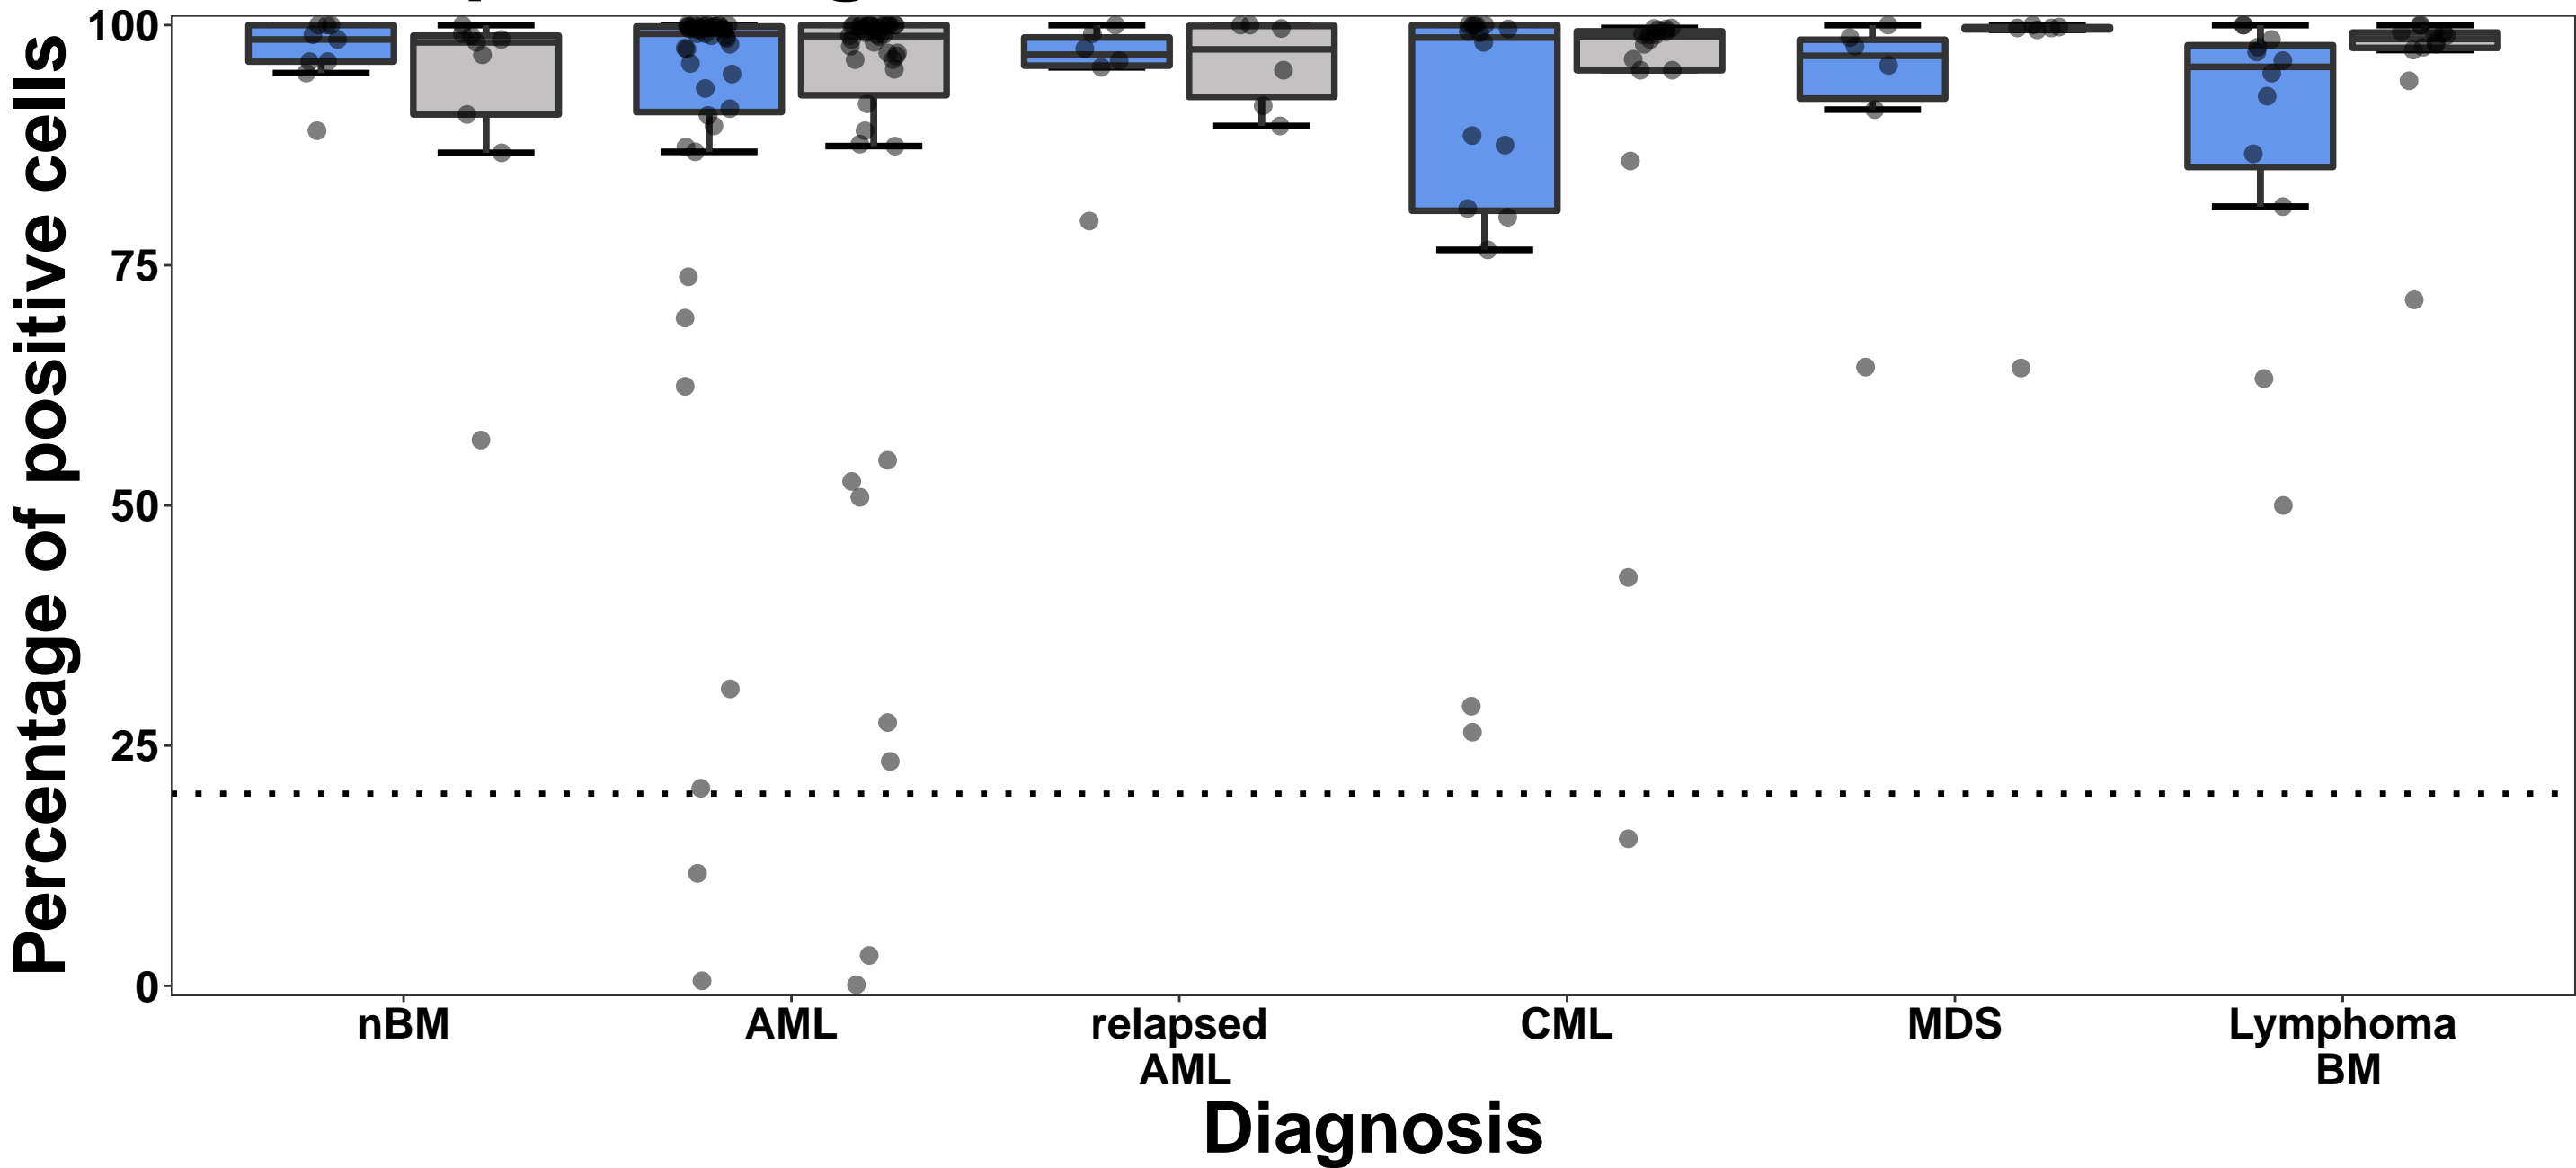

# CD164 staining index

Cell fraction  CD34+/CD38-  CD34+/CD38+

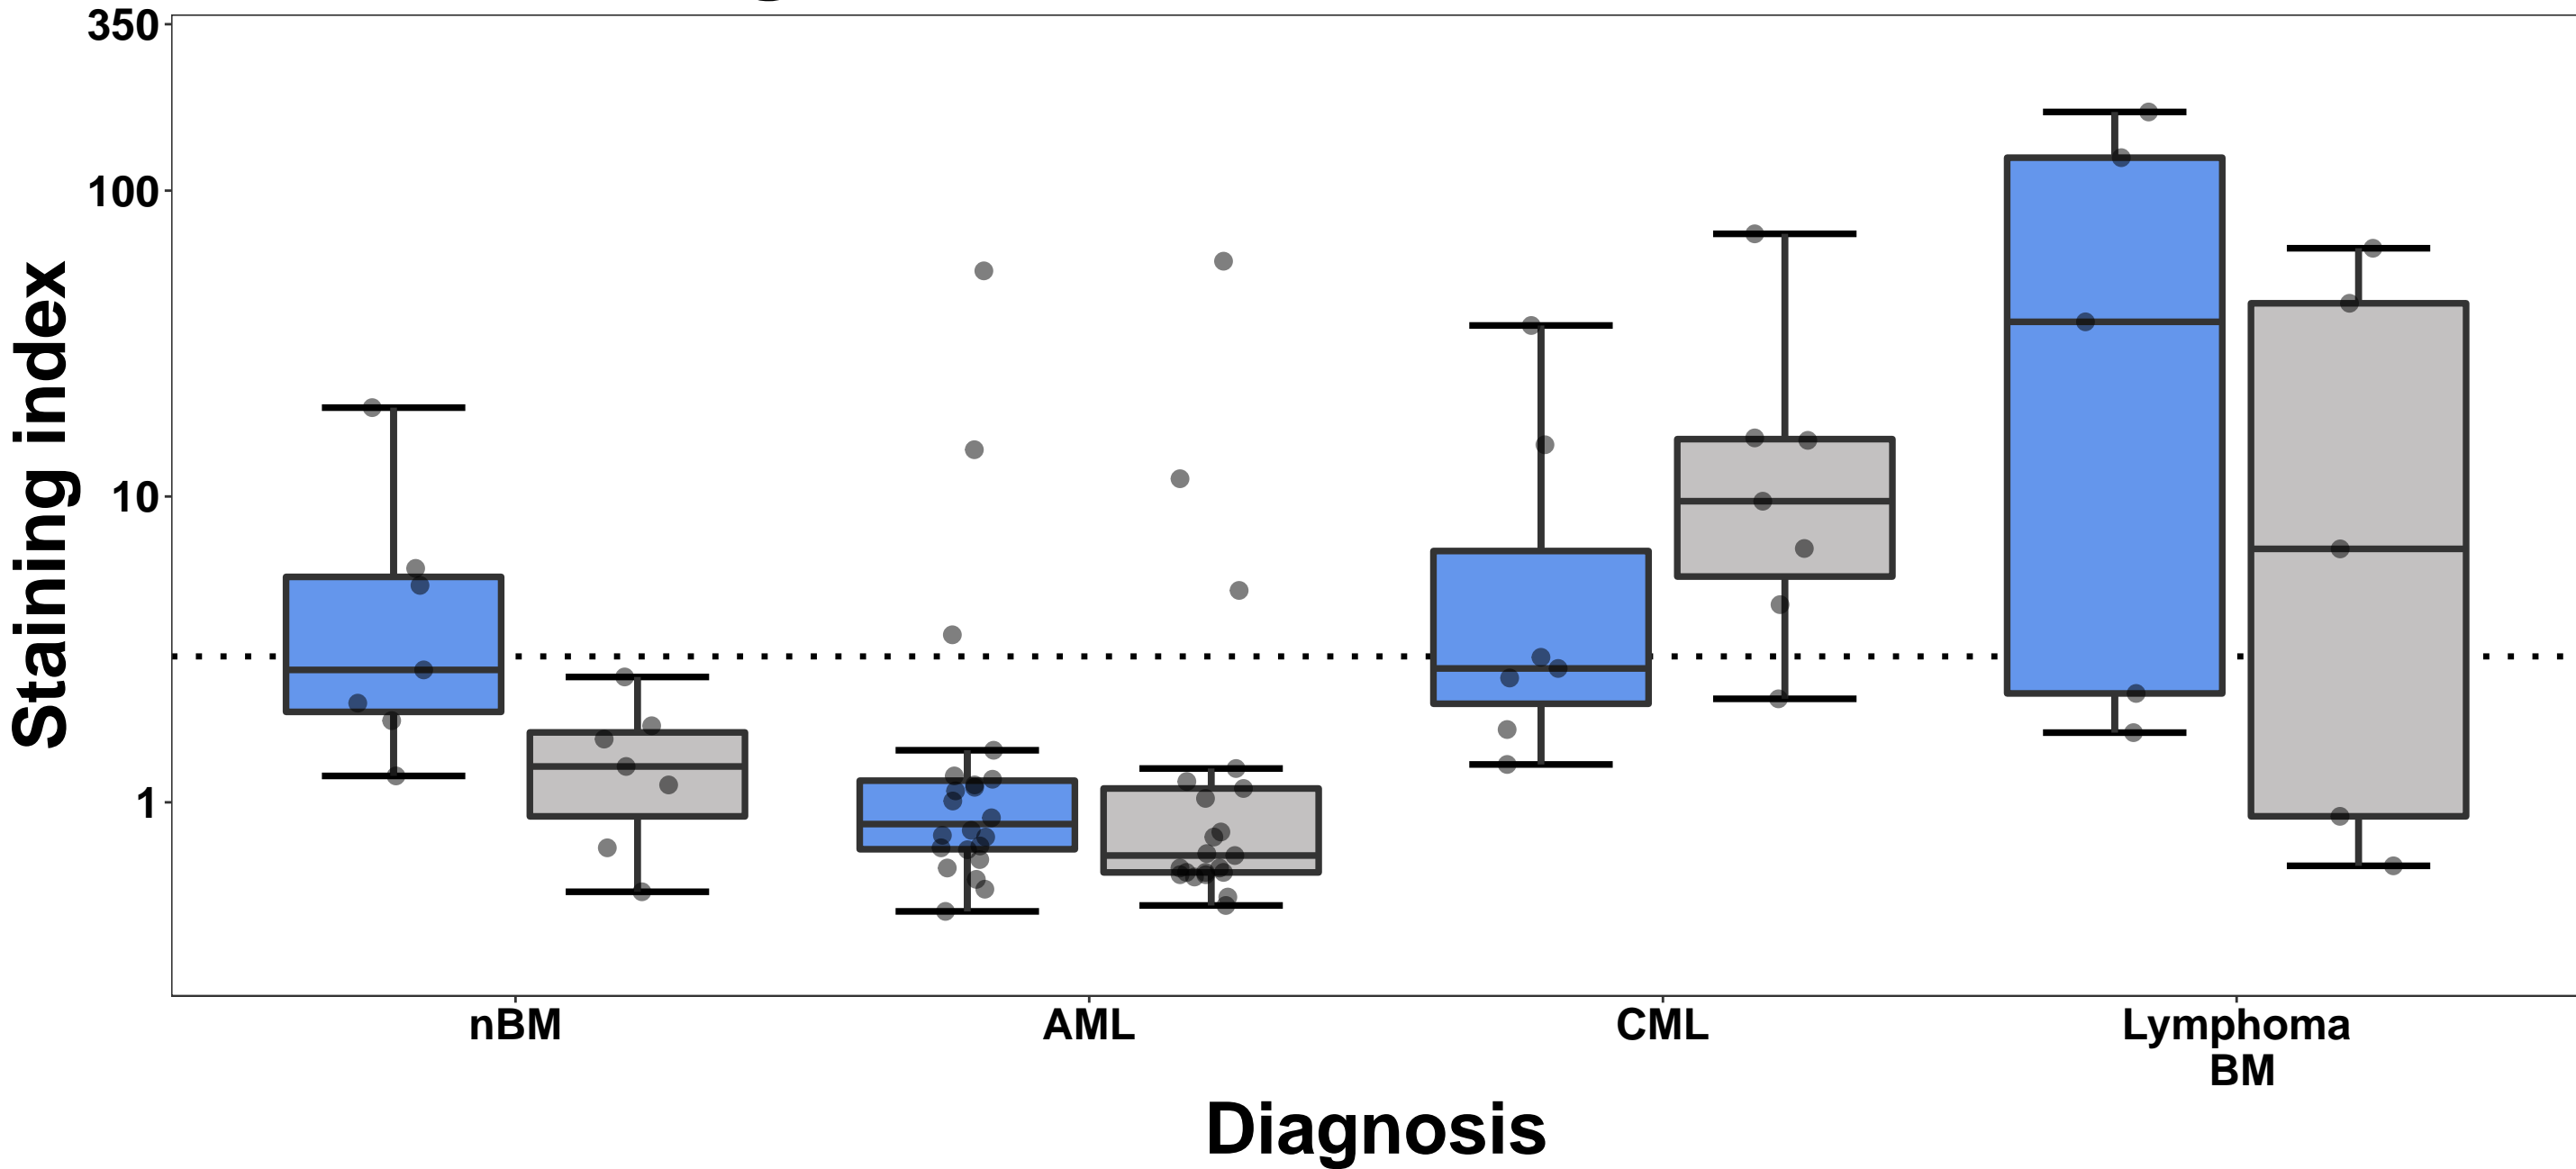

Cell fraction  CD34+/CD38-  CD34+/CD38+

# CD164 percentage

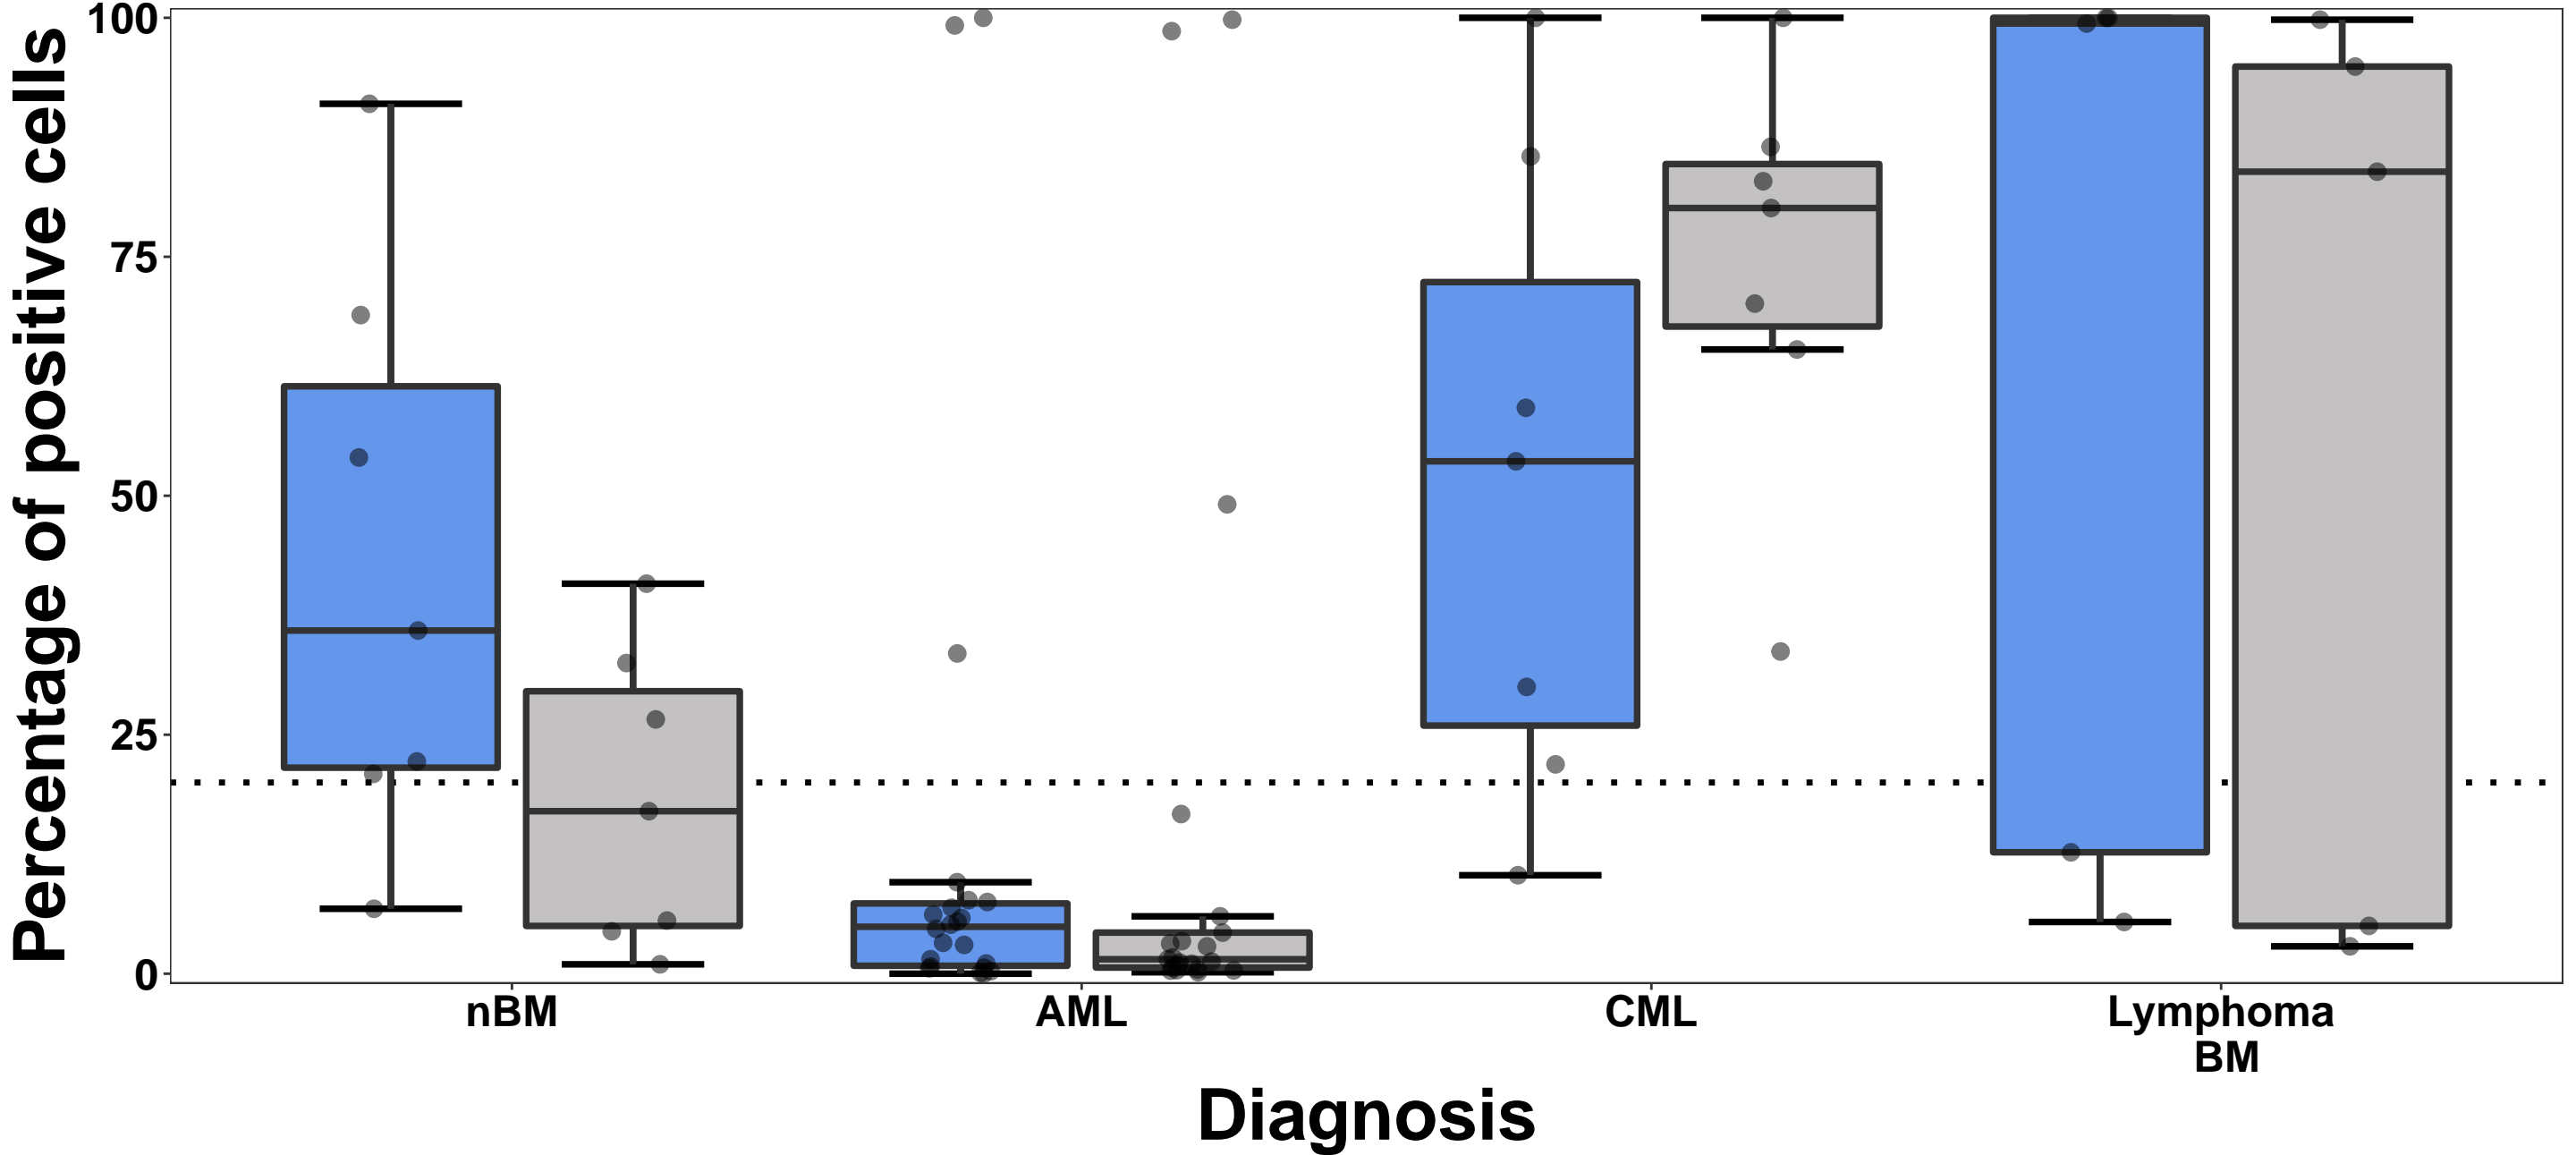

# CD167a staining index

Cell fraction  CD34+/CD38-  CD34+/CD38+

Staining index

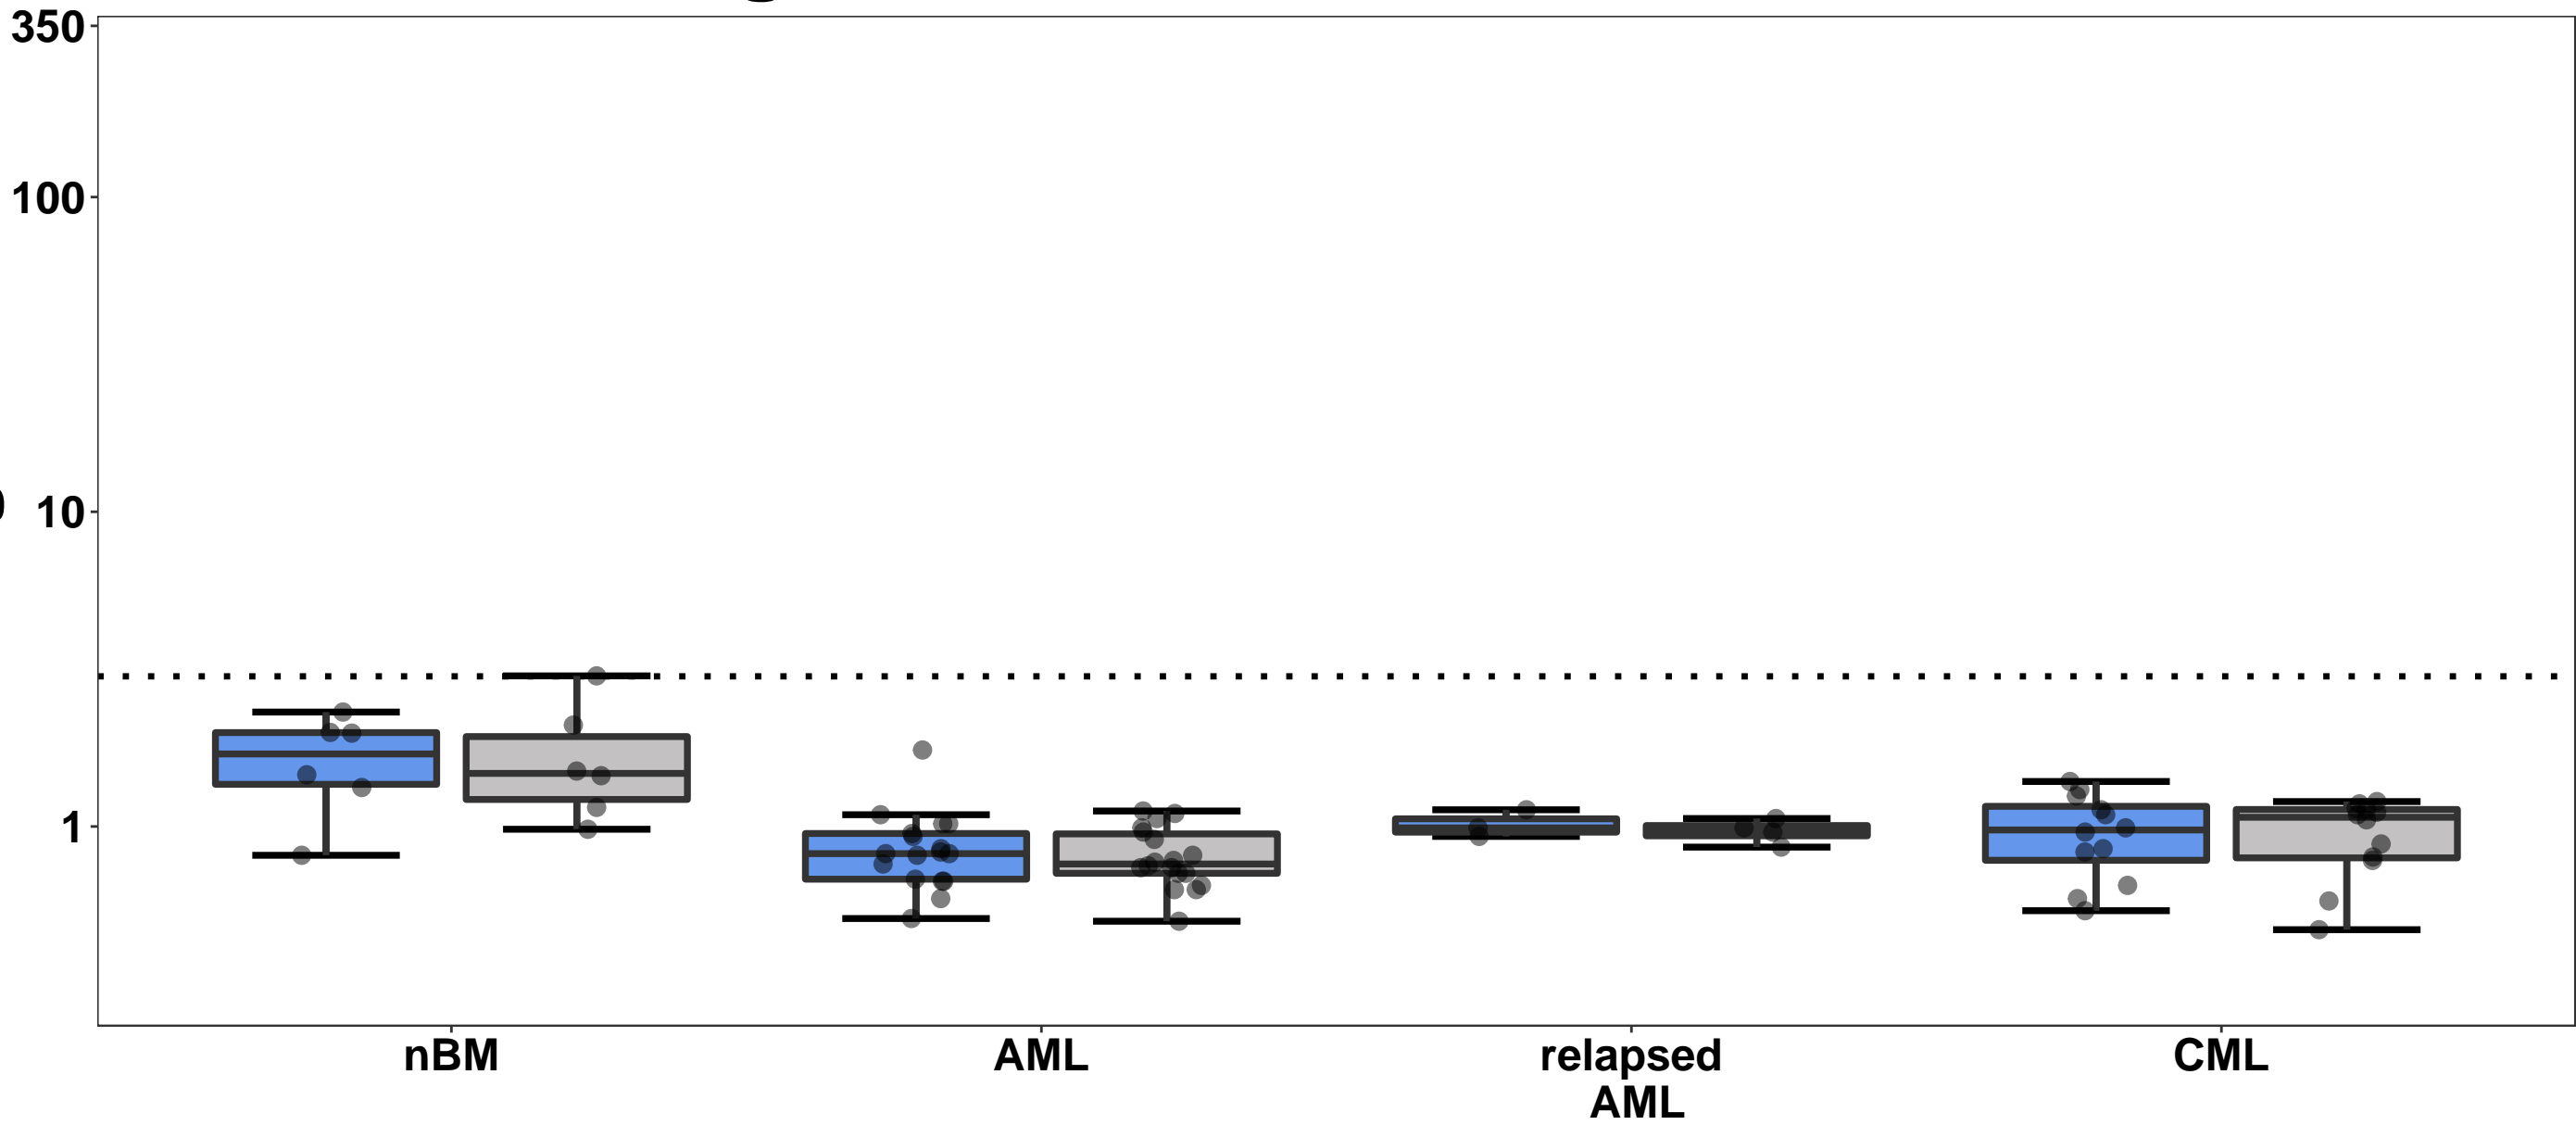

Diagnosis



Cell fraction CD34+/CD38- CD34+/CD38+

# CD167a percentage

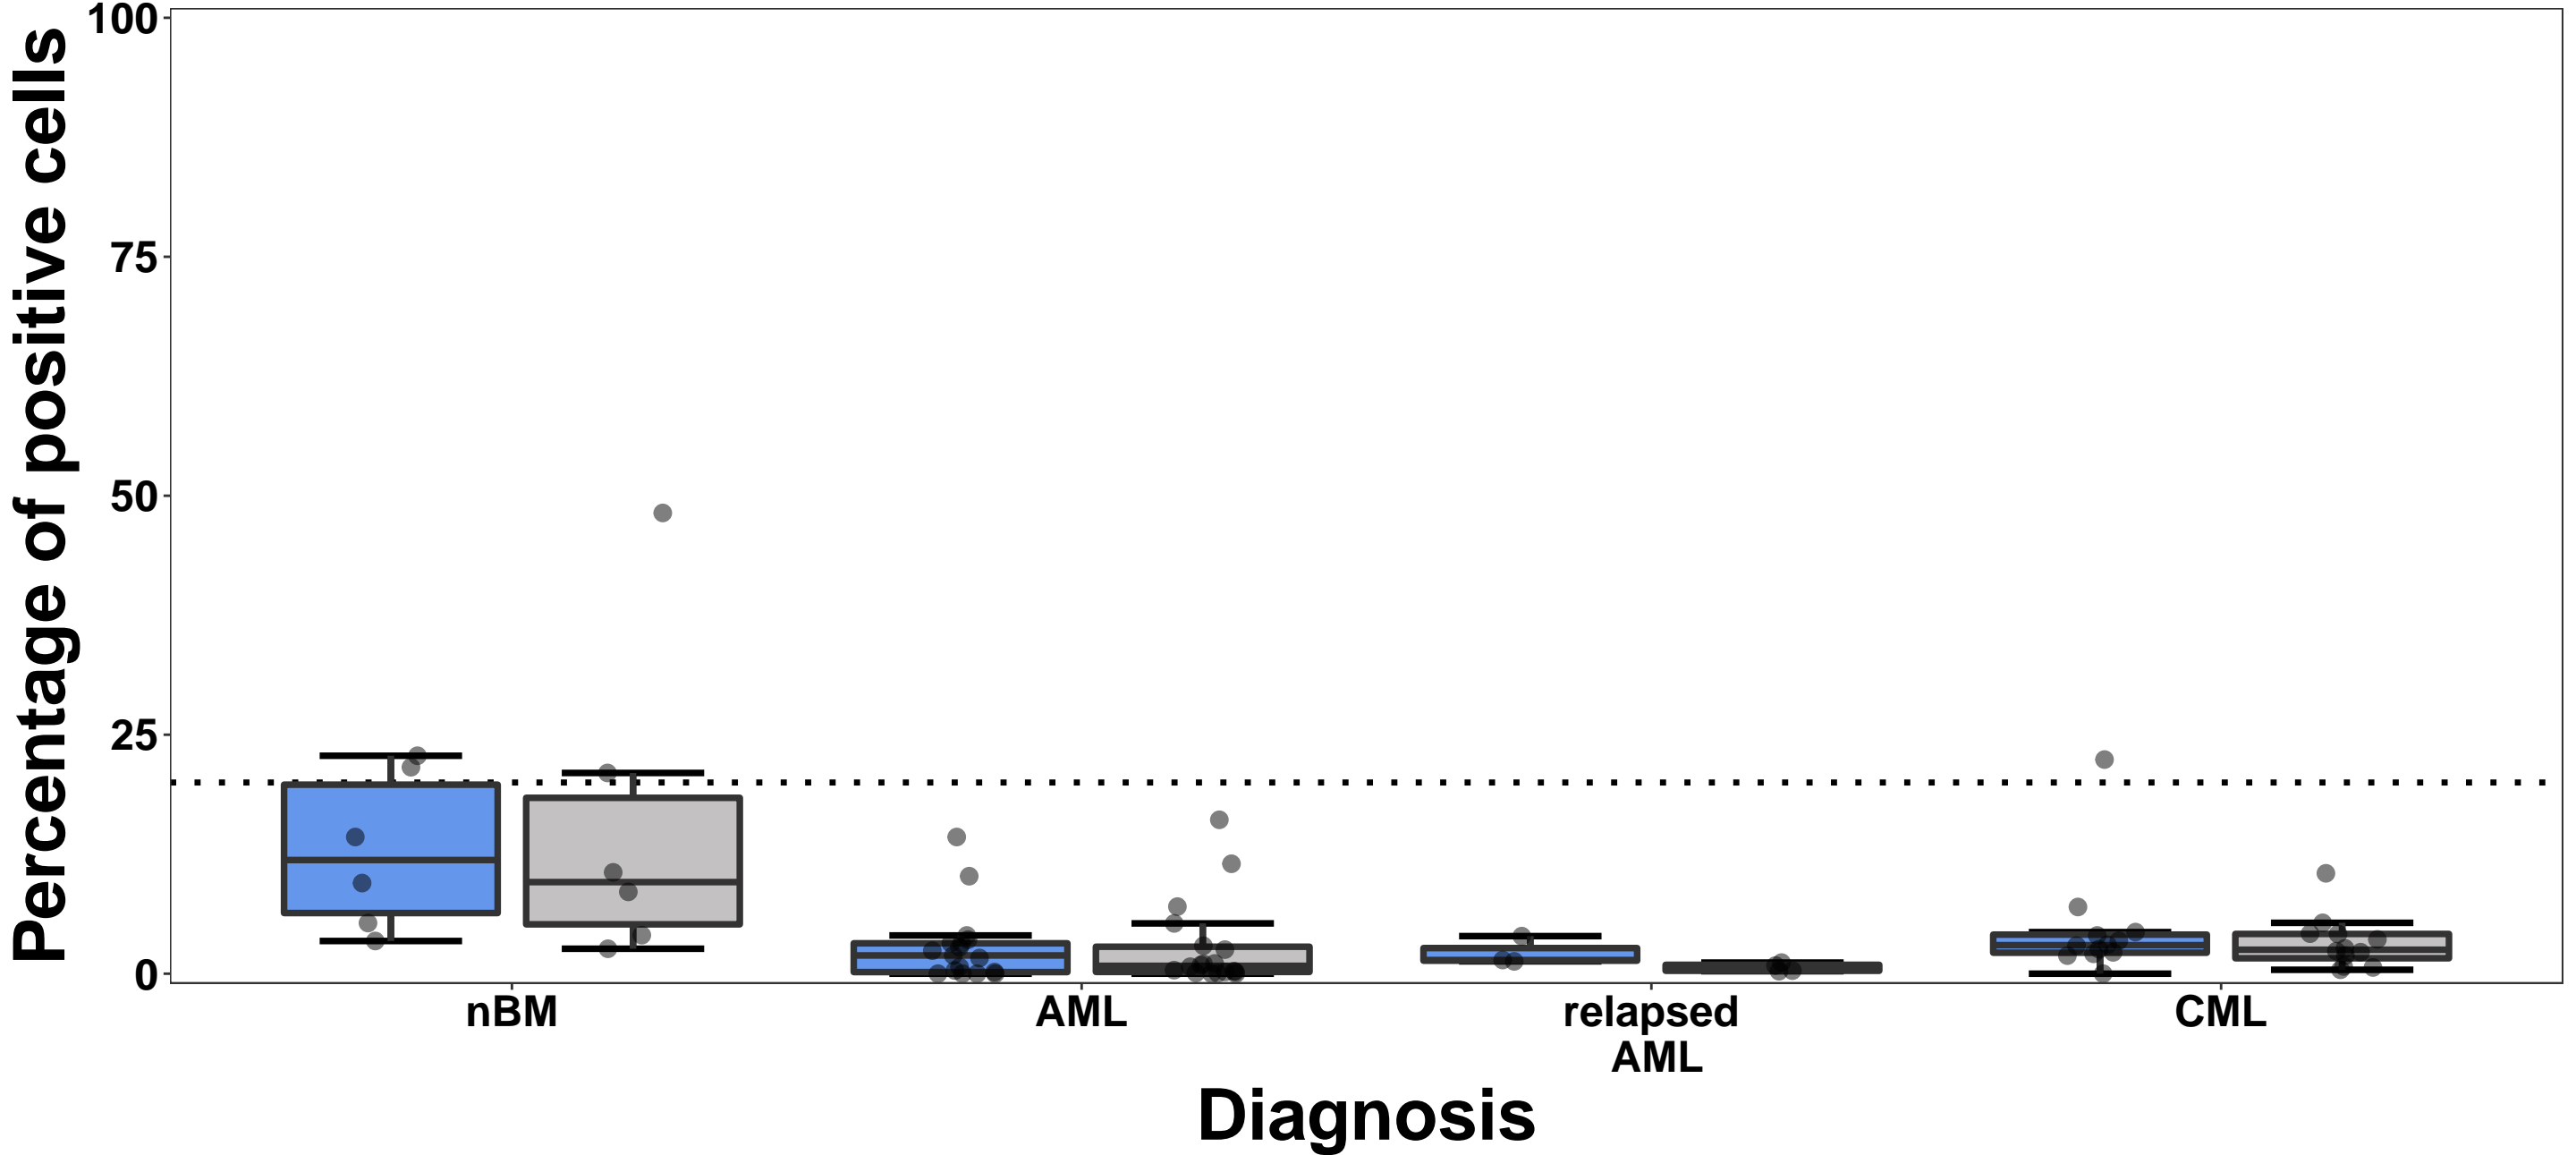

Cell fraction  CD34+/CD38-  CD34+/CD38+

# CD184 staining index

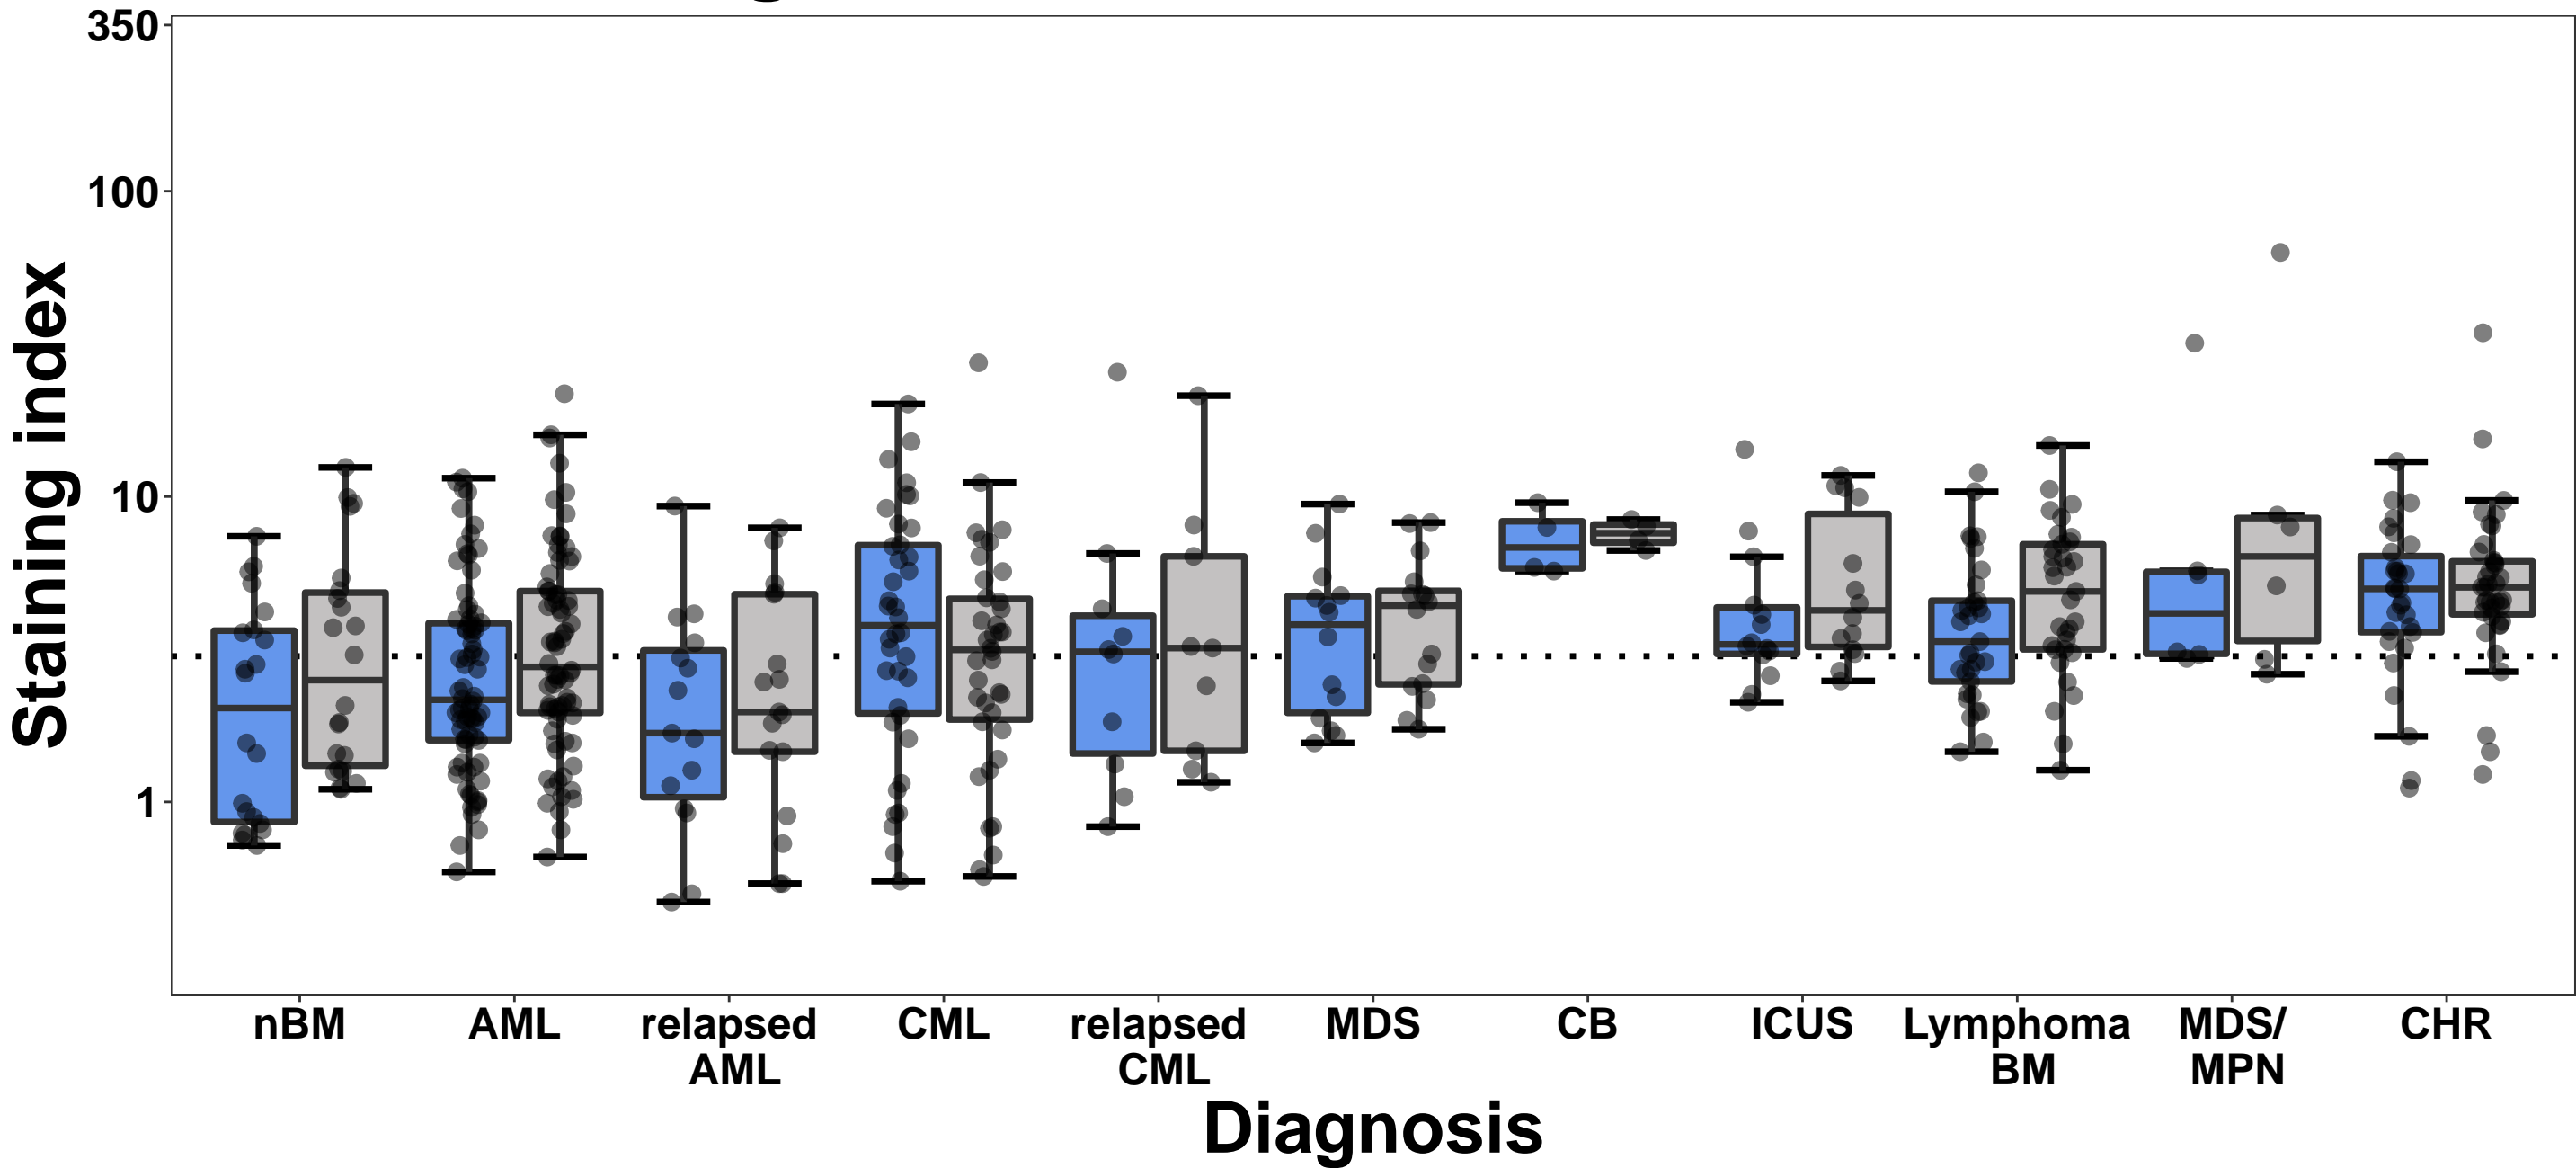

Cell fraction  CD34+/CD38-  CD34+/CD38+

# CD184 percentage

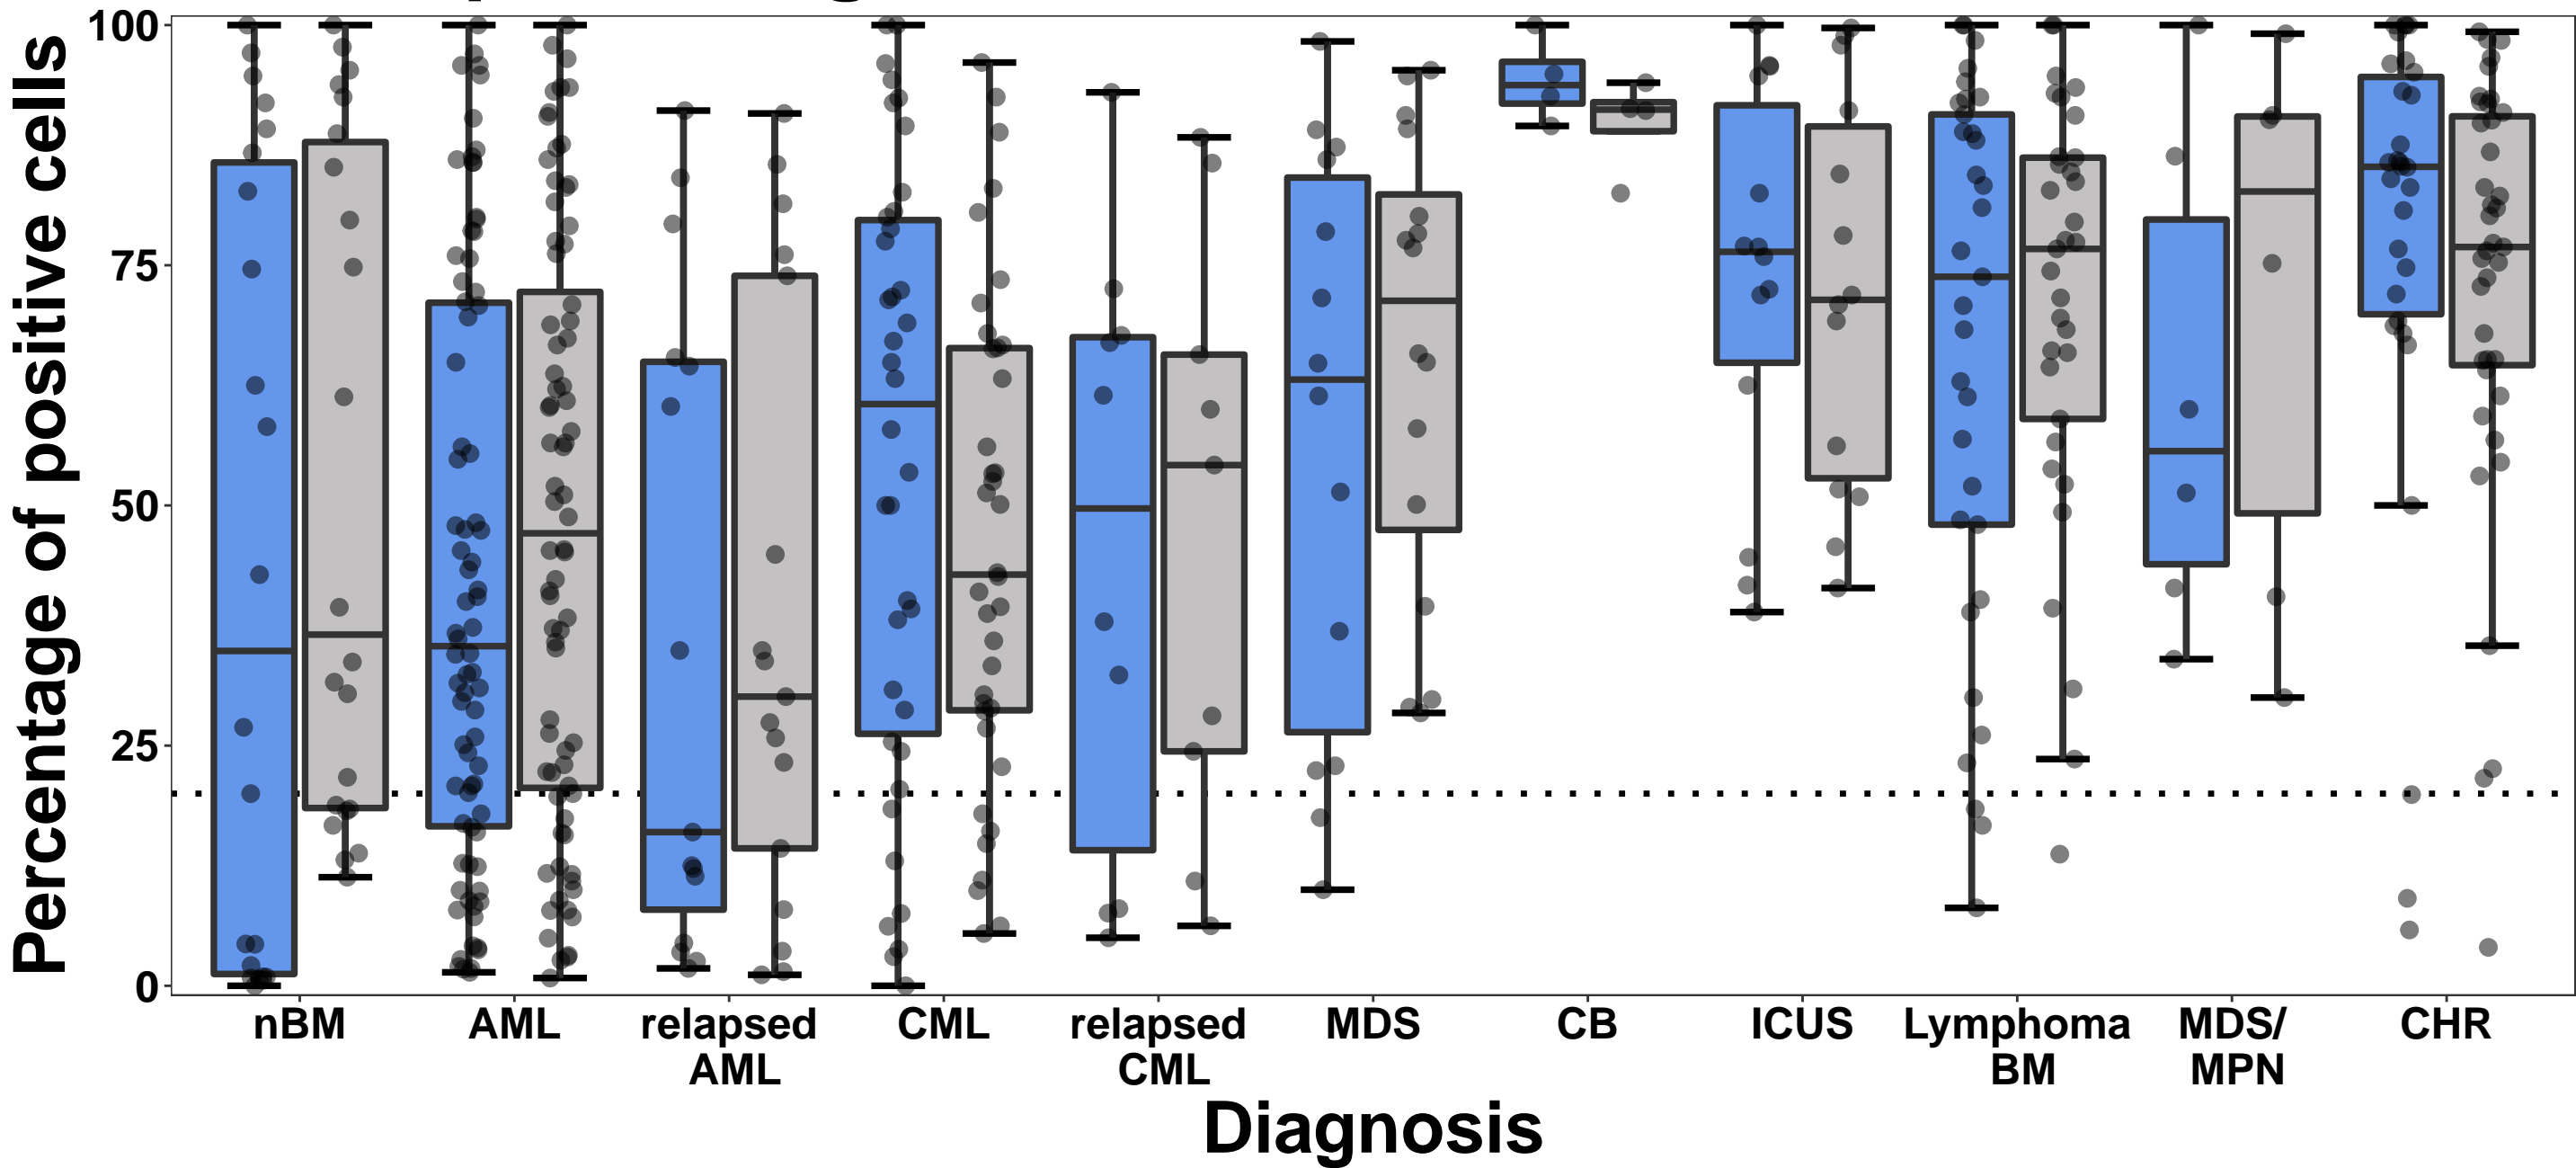

# CD203c staining index

Cell fraction  CD34+/CD38-  CD34+/CD38+

Staining index

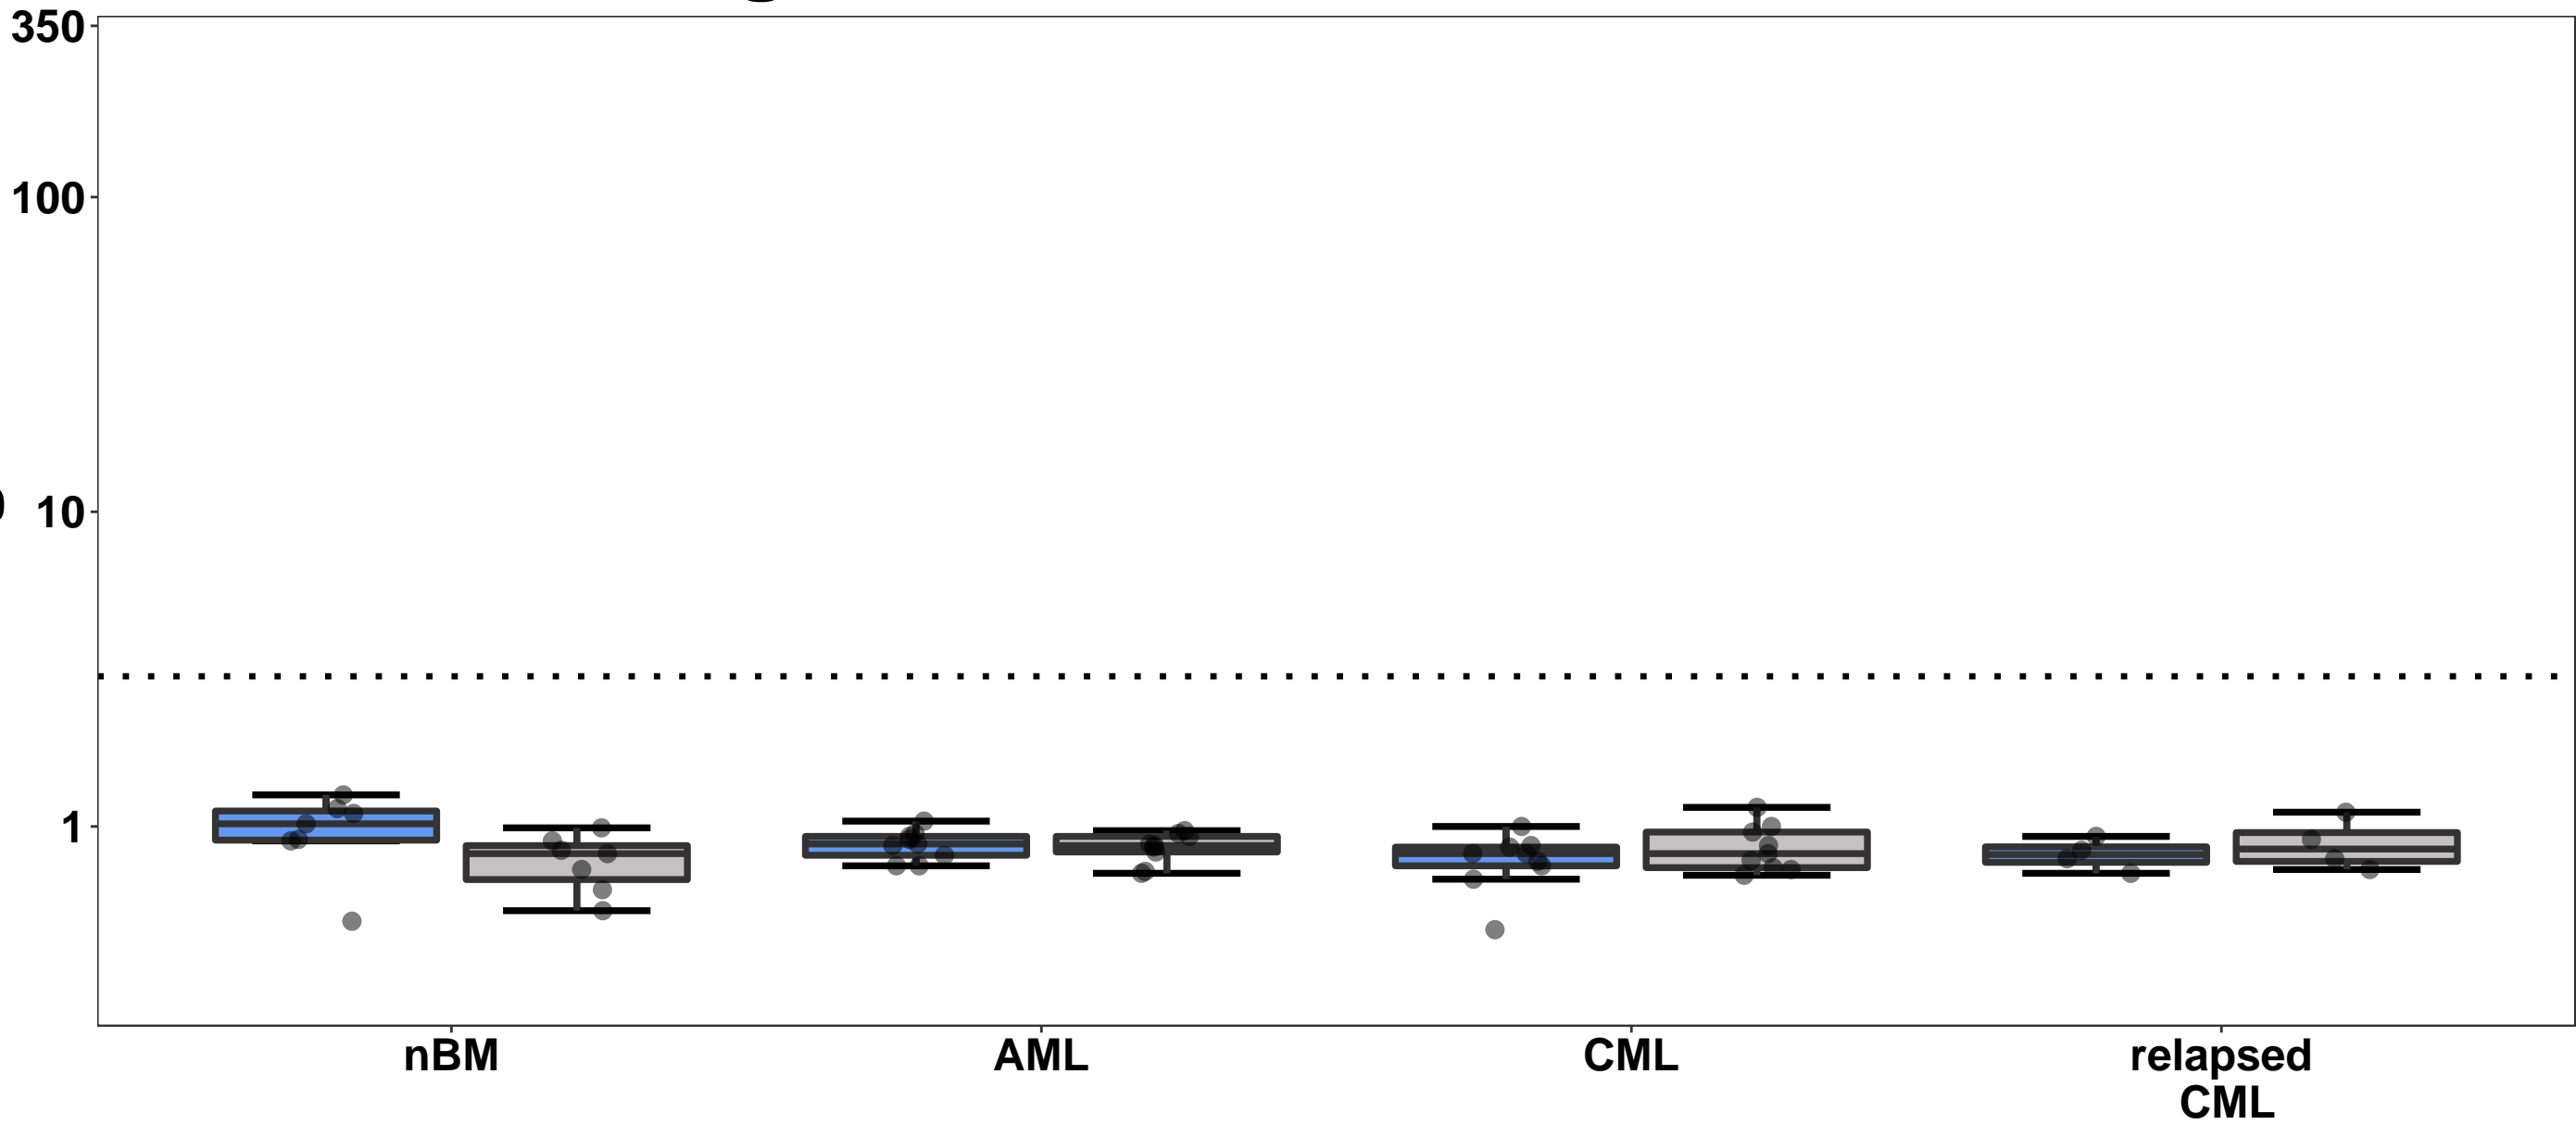

Cell fraction CD34+/CD38- CD34+/CD38+

# CD203c percentage

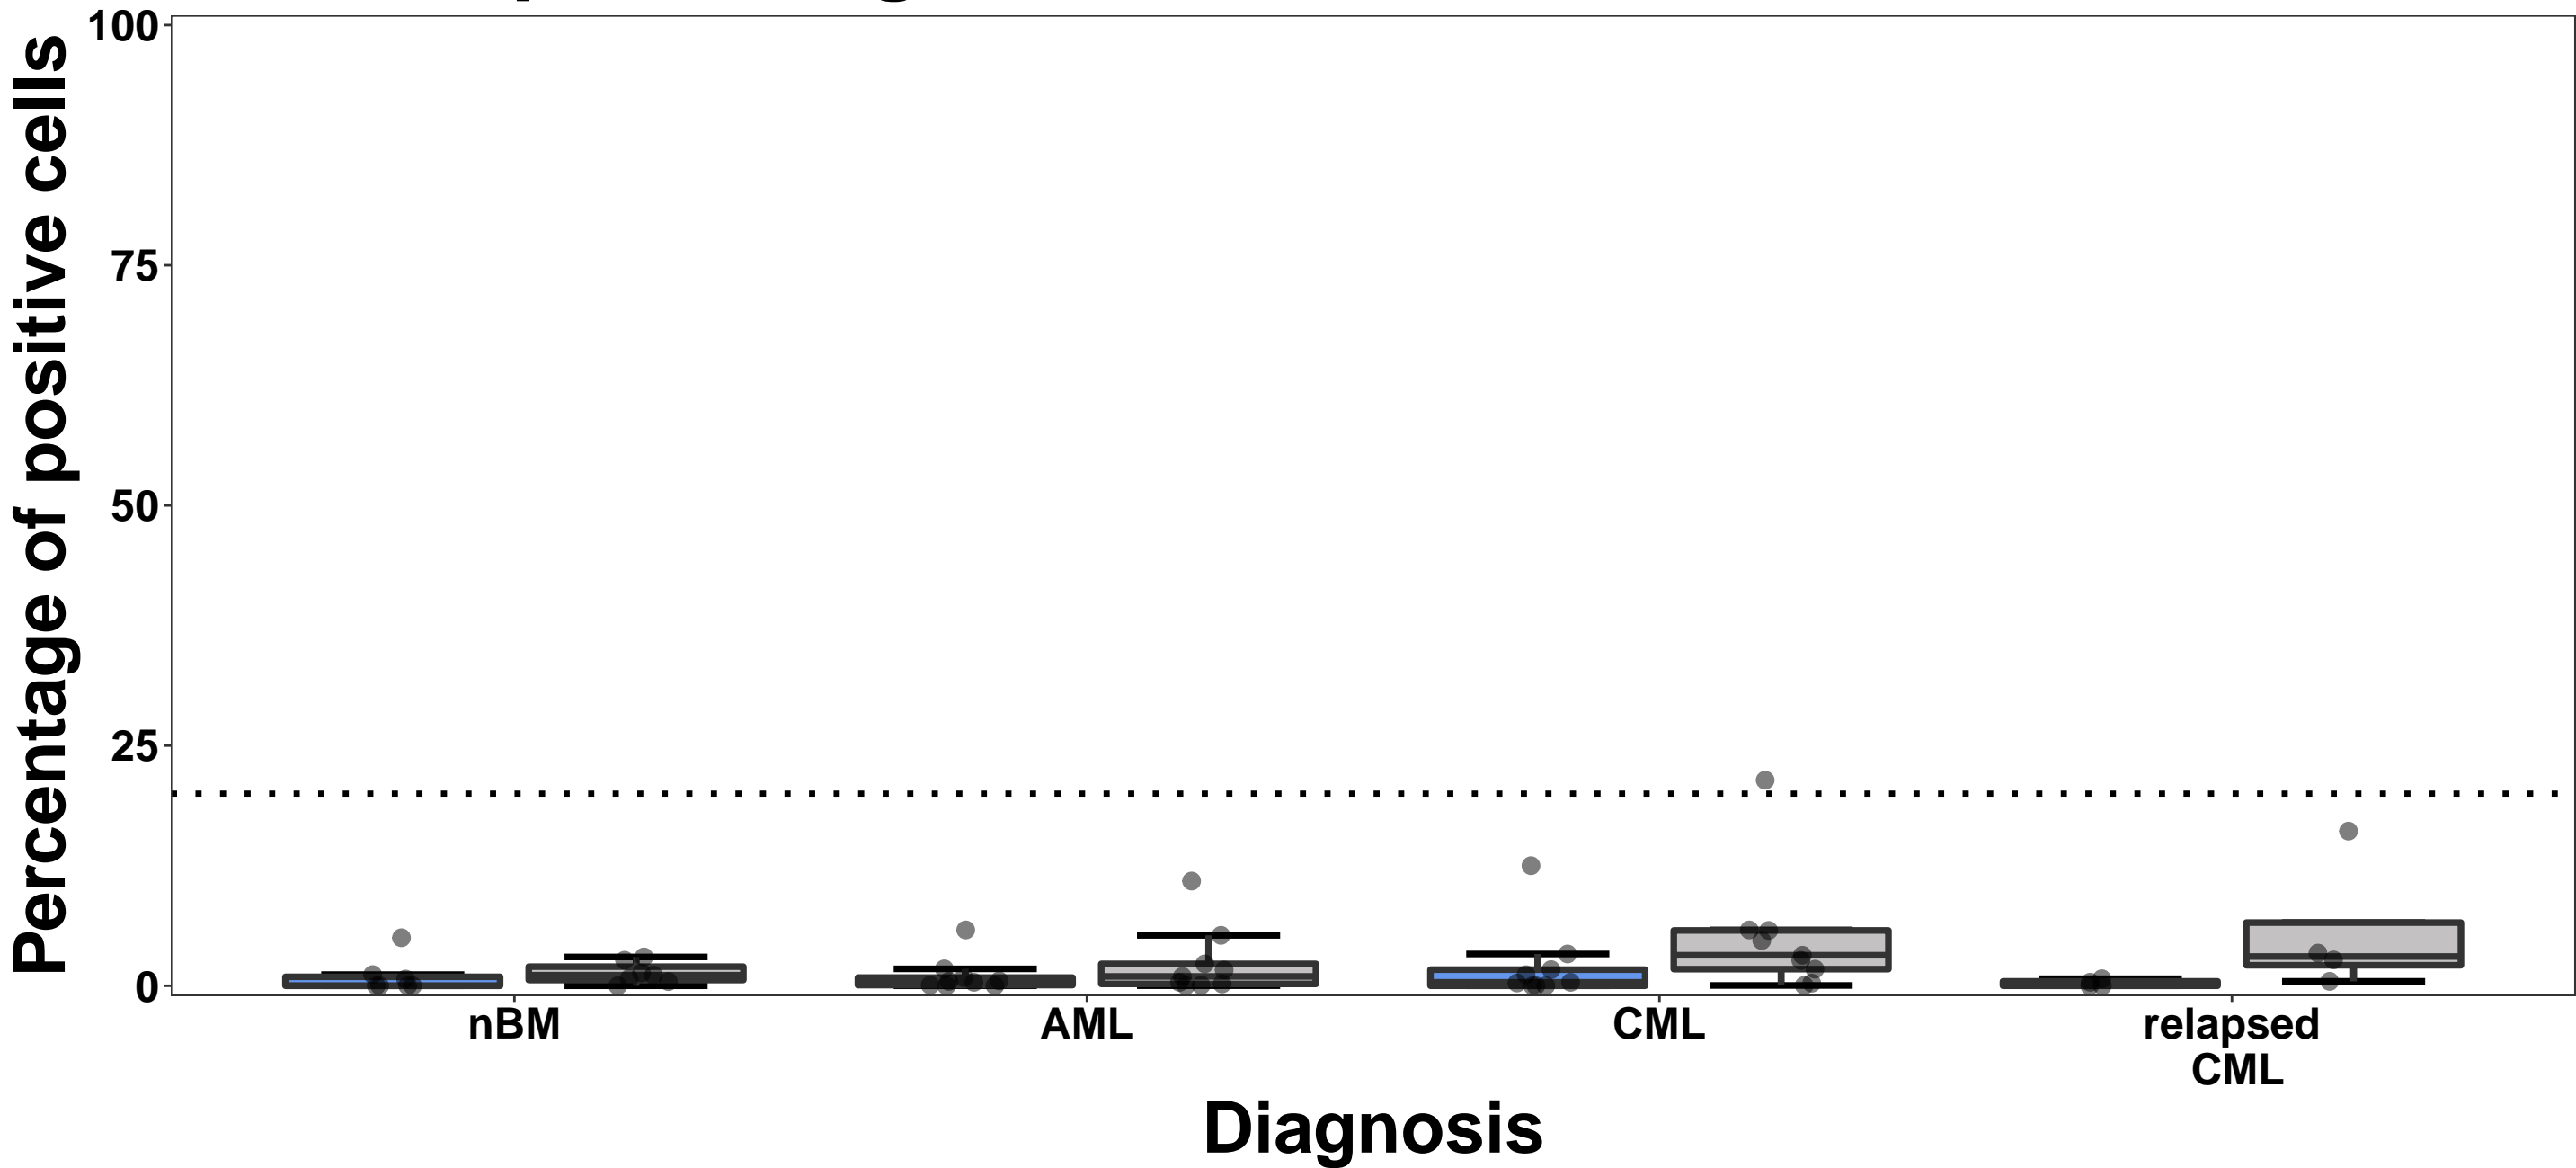

# CD206 staining index

Cell fraction  CD34+/CD38-  CD34+/CD38+

Staining index

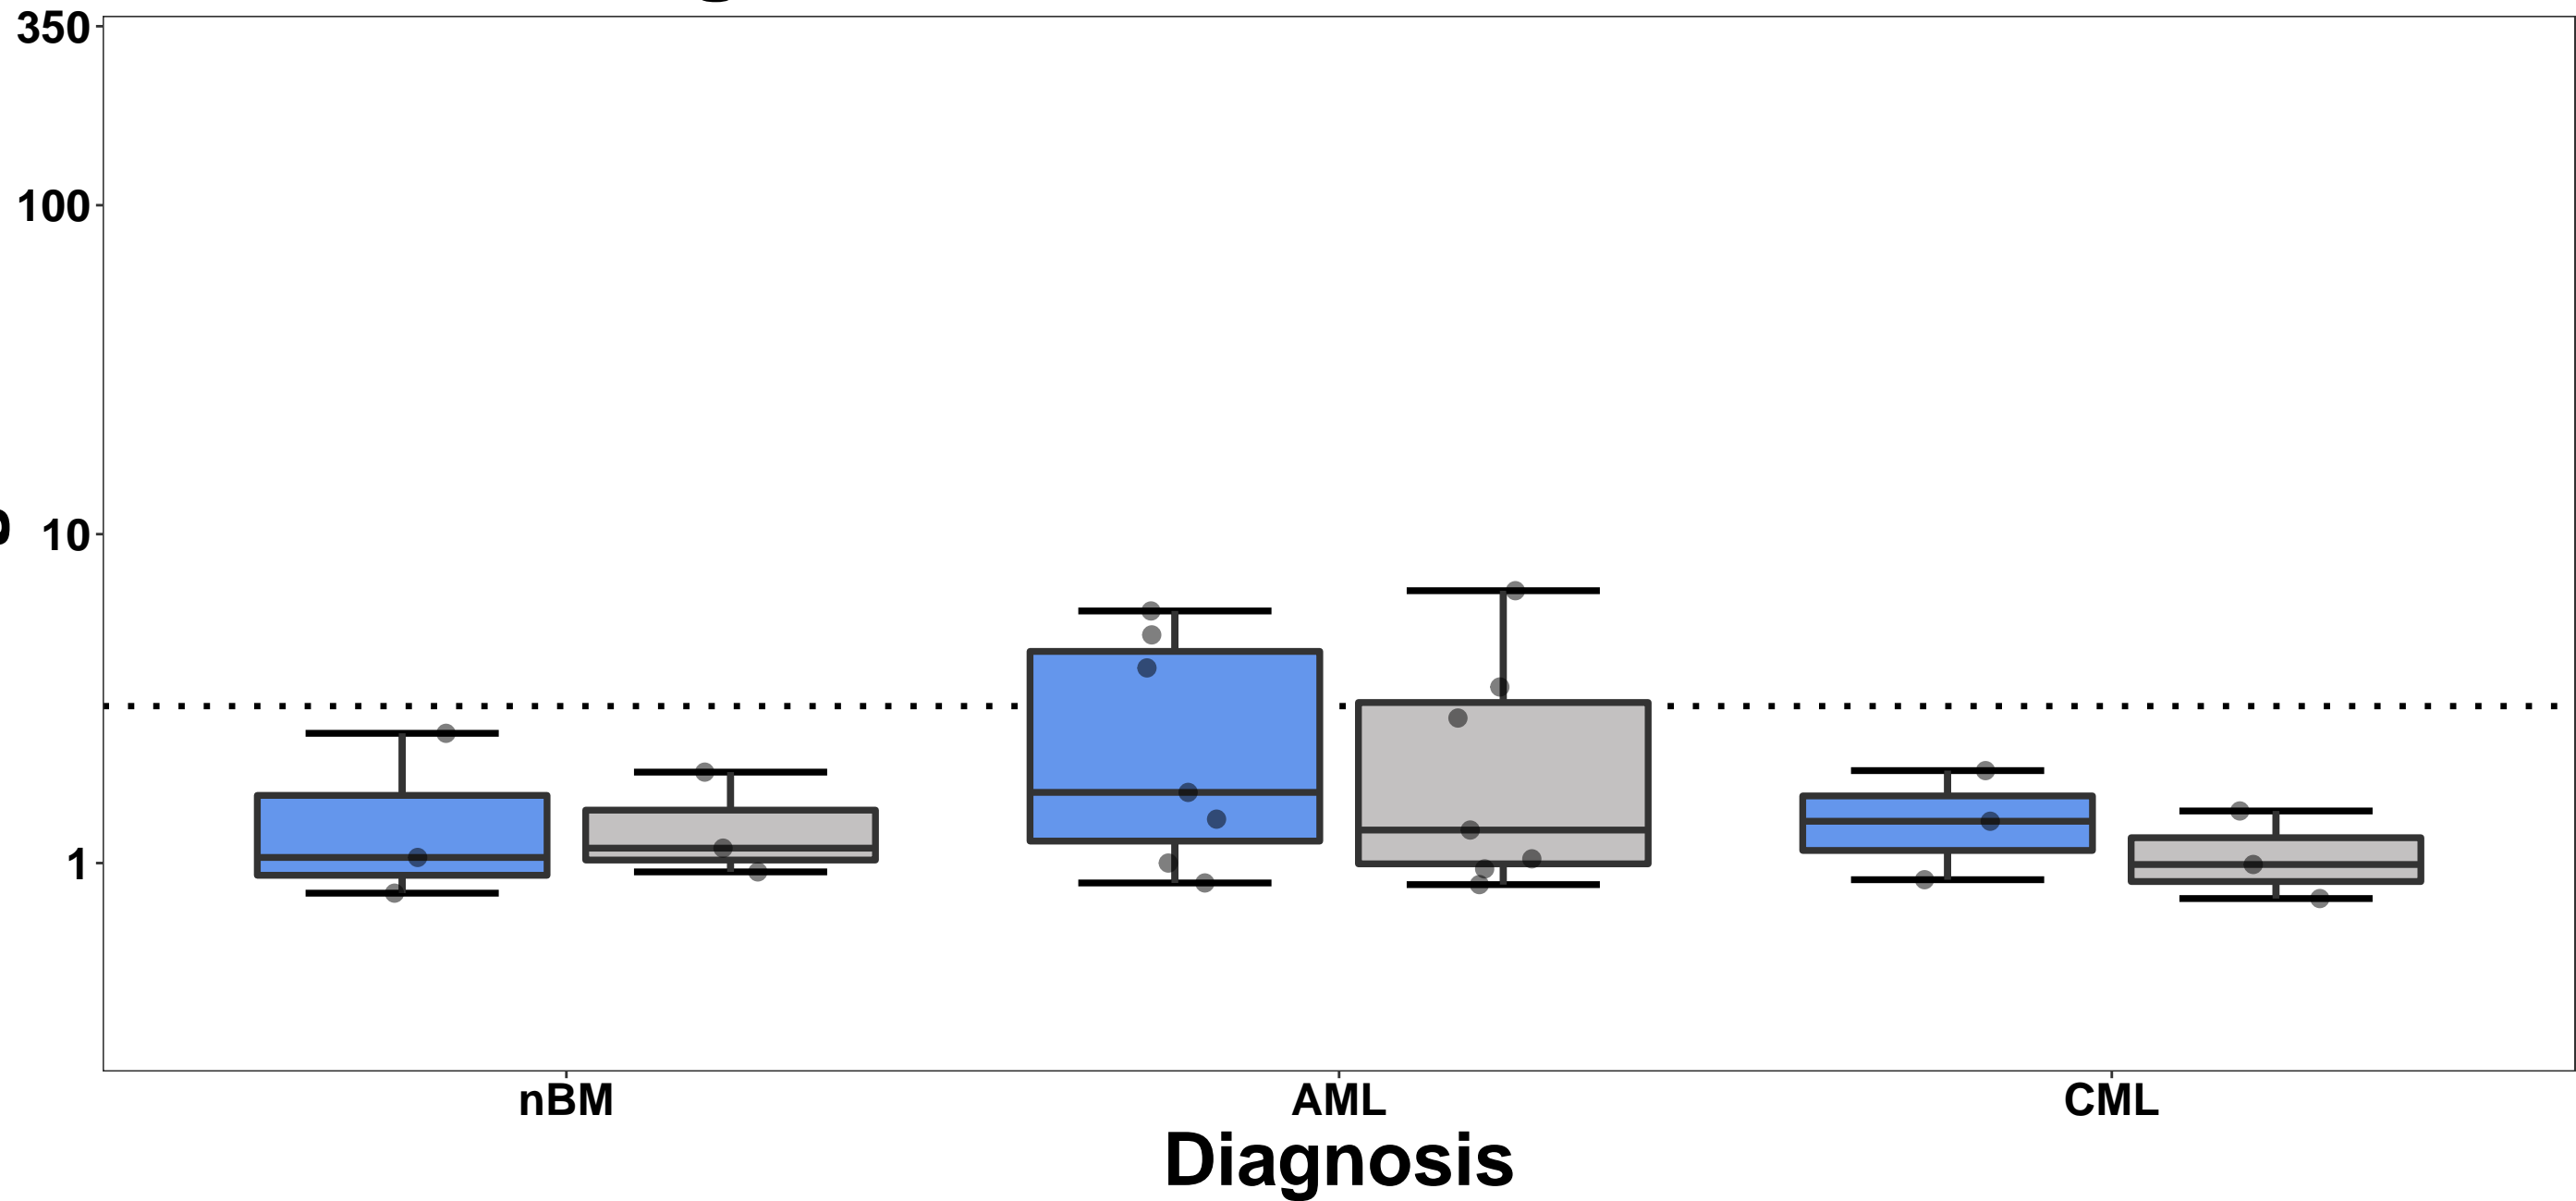

Cell fraction  CD34+/CD38-  CD34+/CD38+

# CD206 percentage

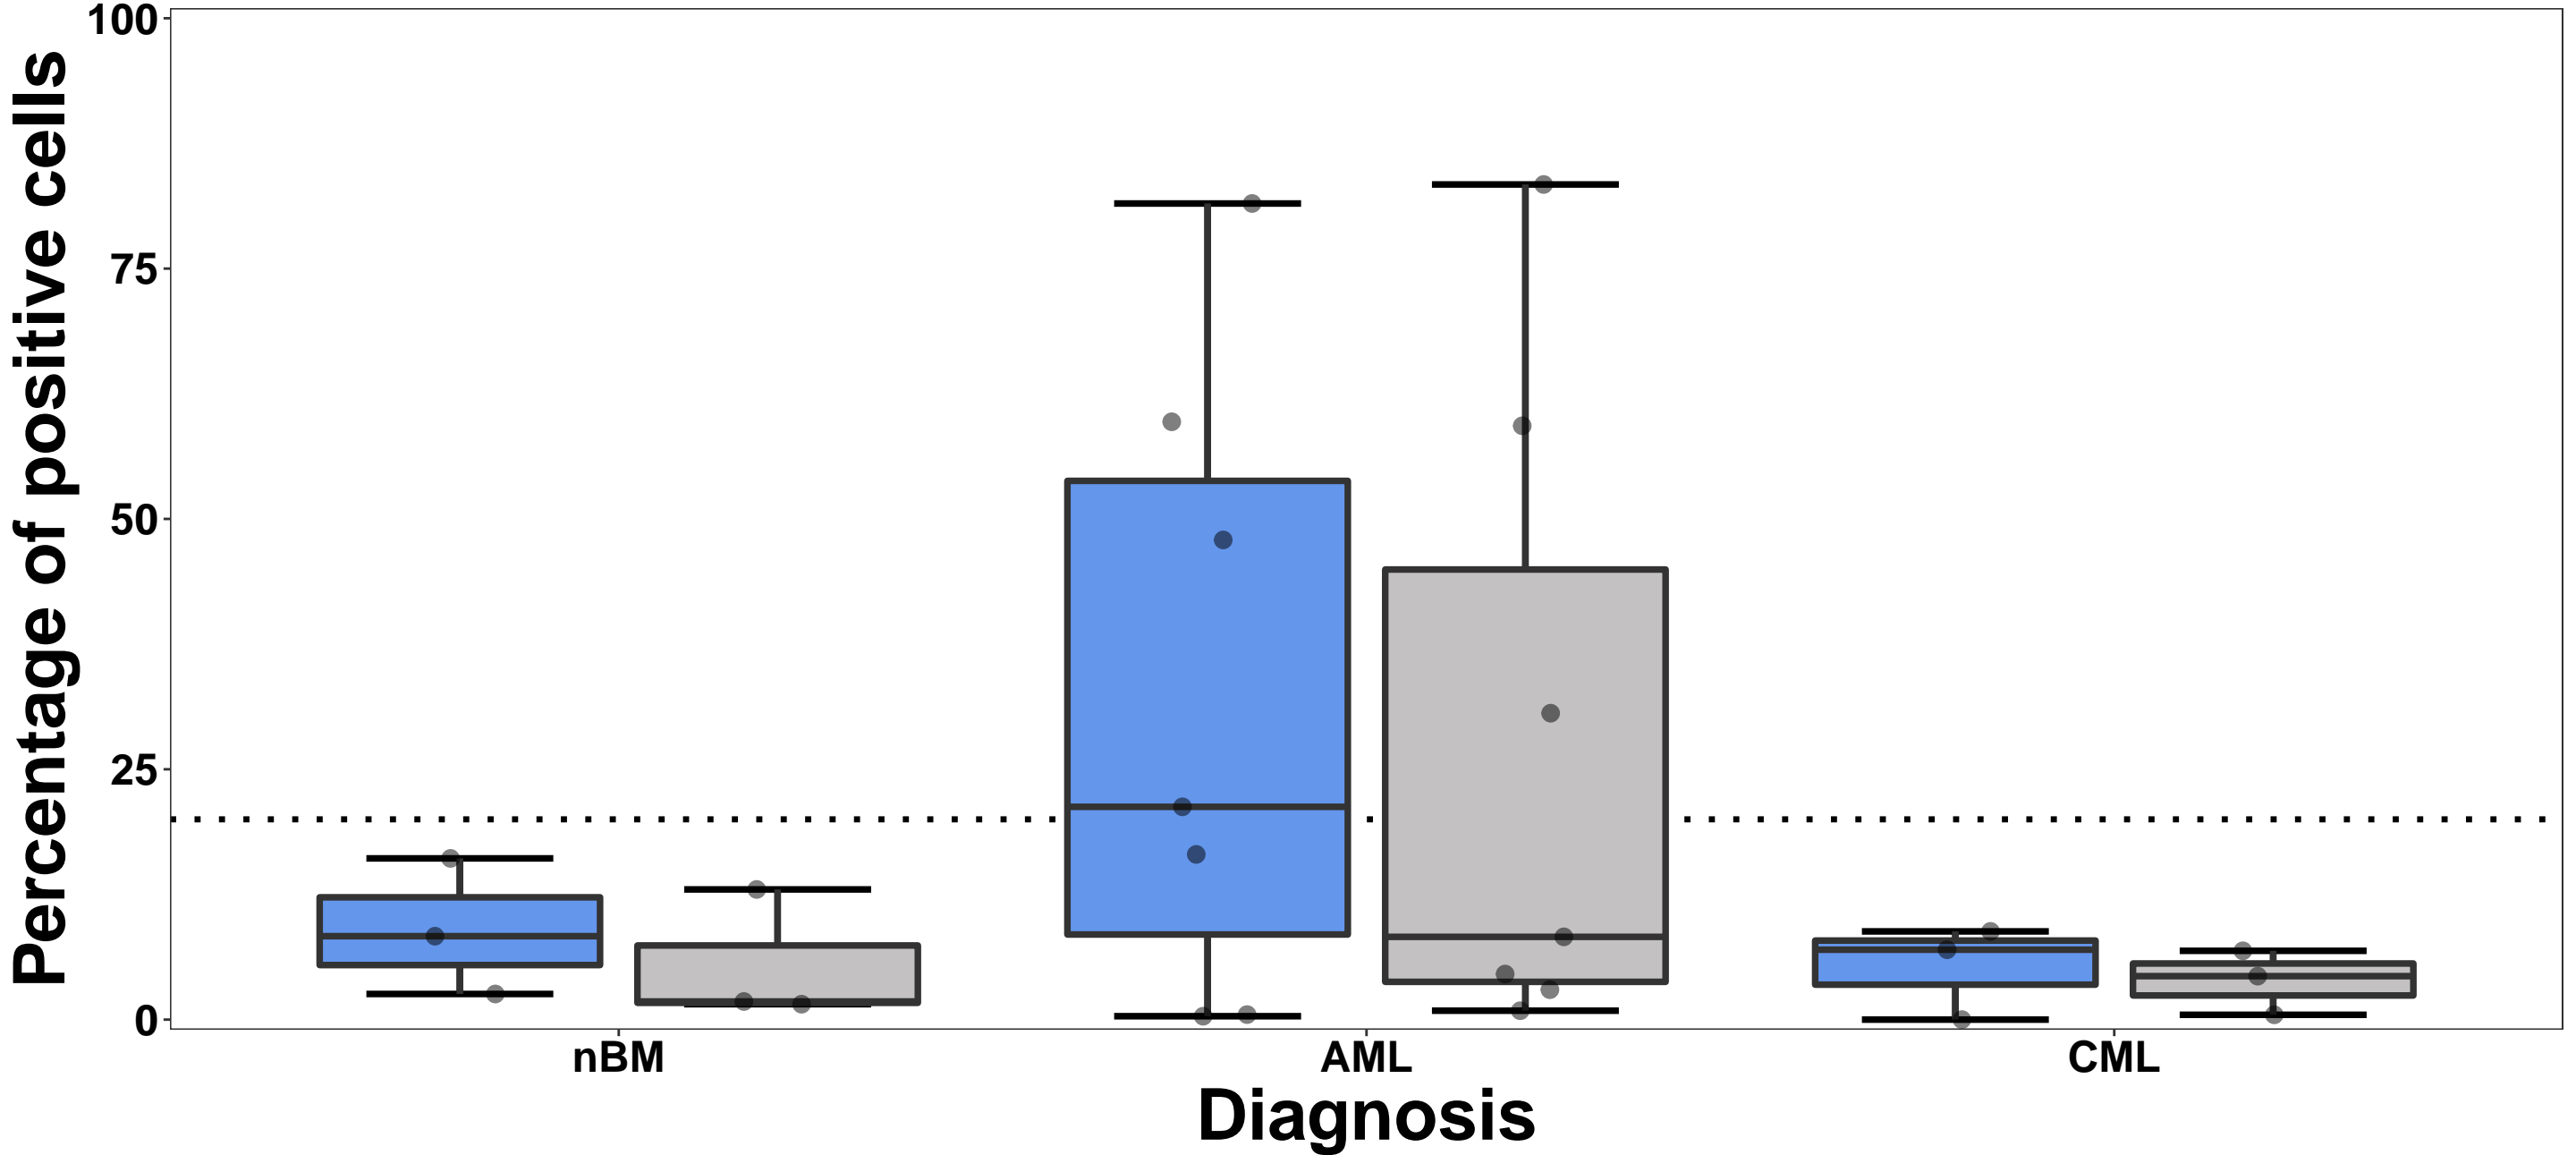

Cell fraction  CD34+/CD38-  CD34+/CD38+

# CD221 staining index

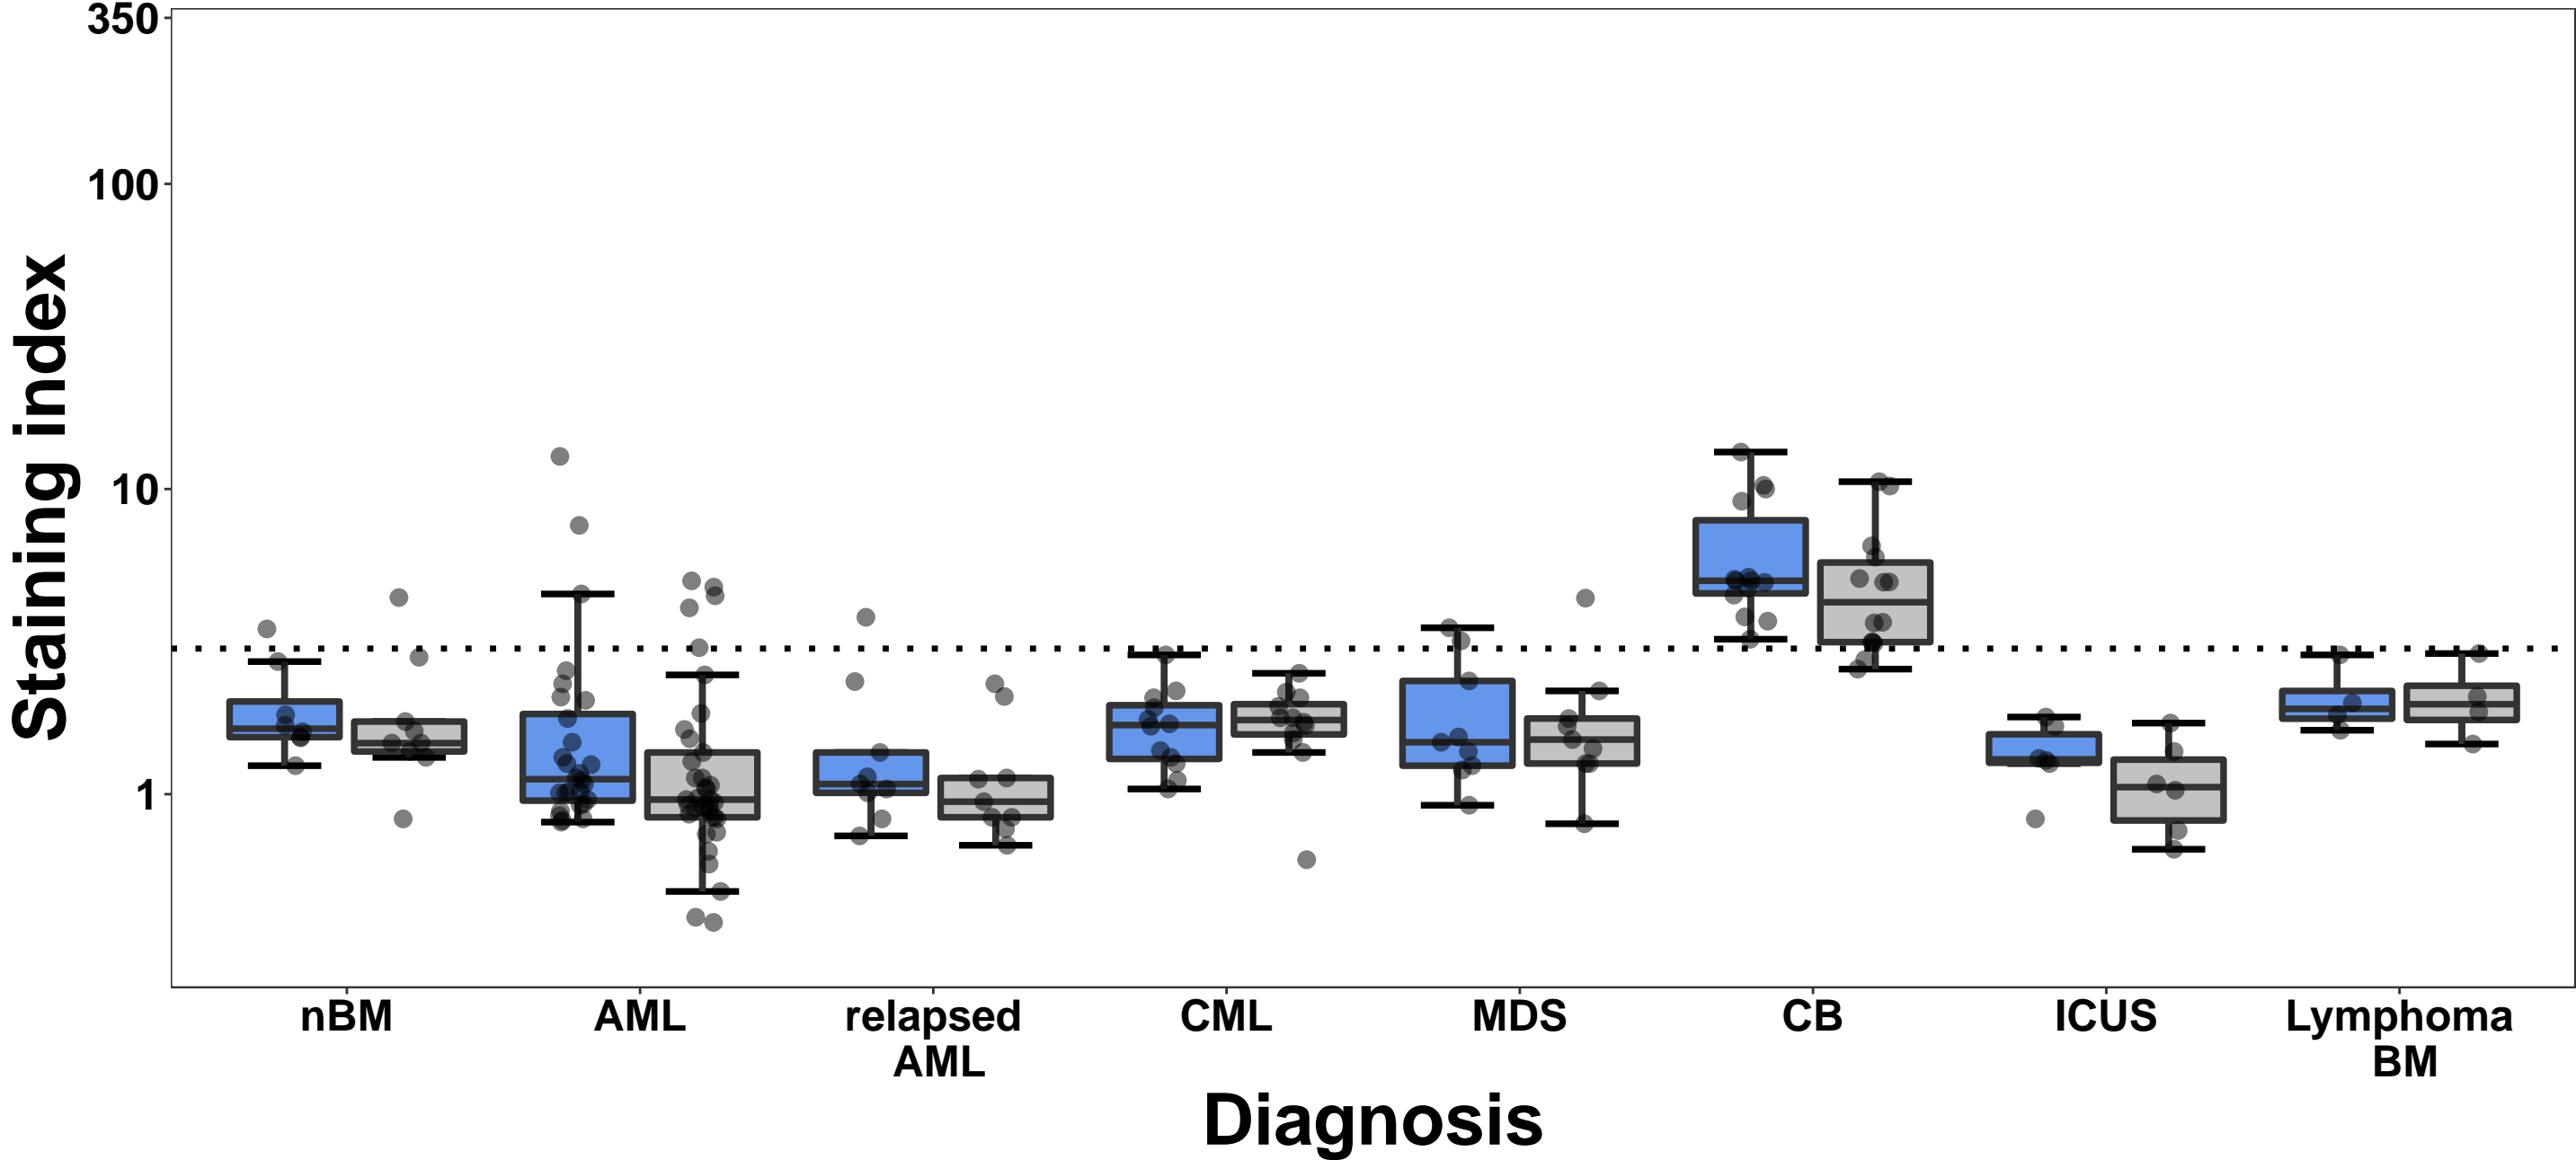



Cell fraction  CD34+/CD38-  CD34+/CD38+

# CD221 percentage

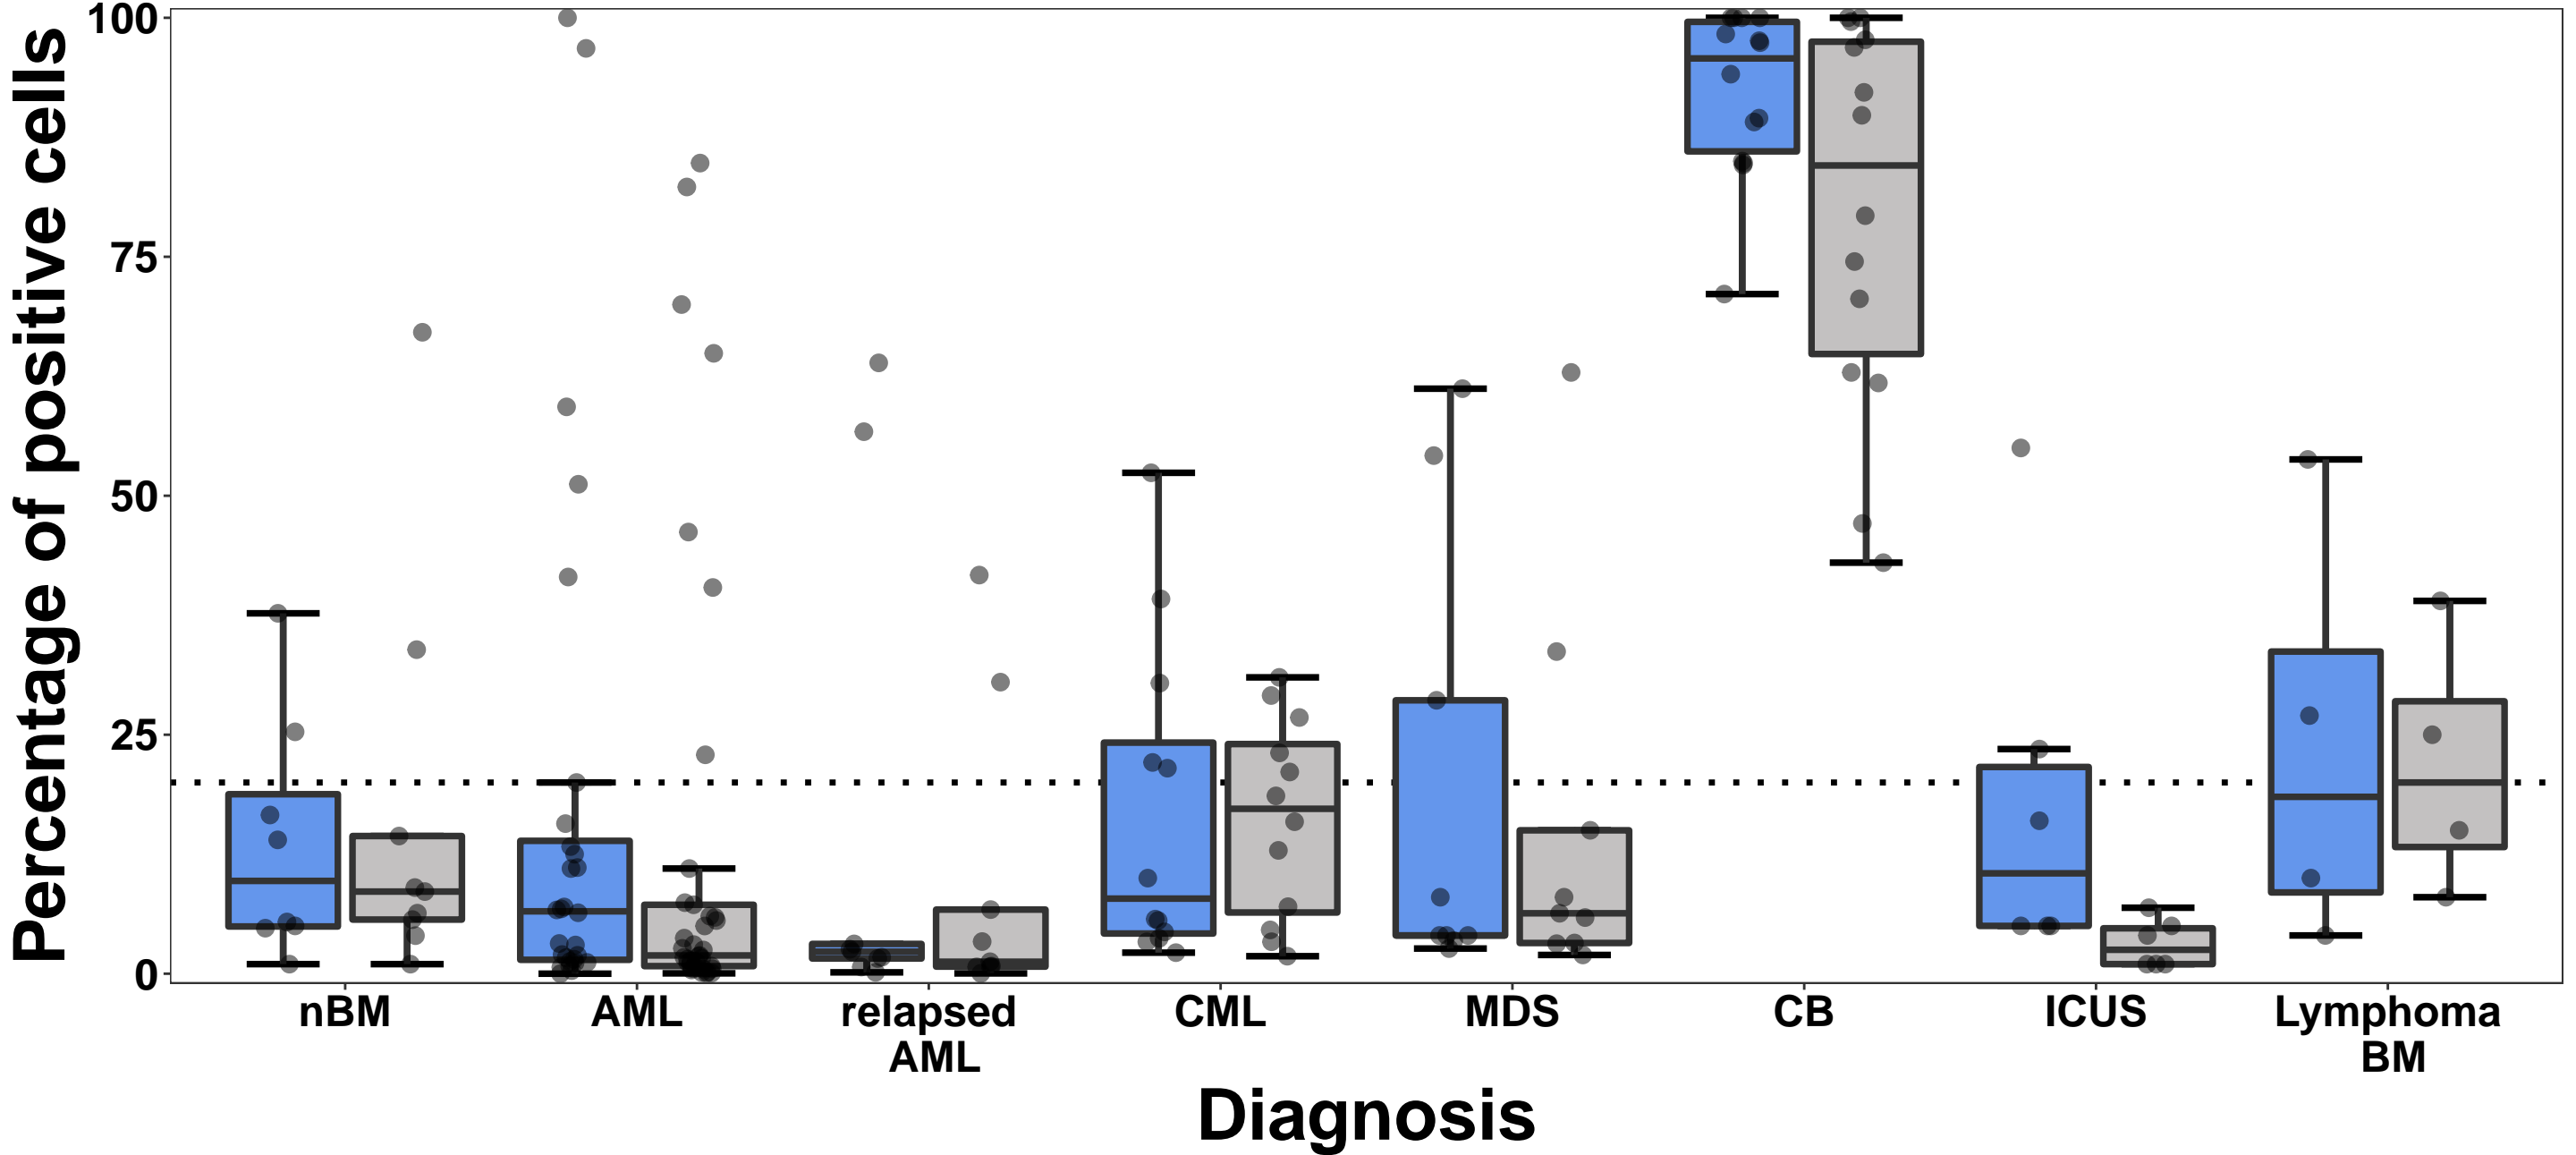

Cell fraction  CD34+/CD38-  CD34+/CD38+

# CD243 staining index

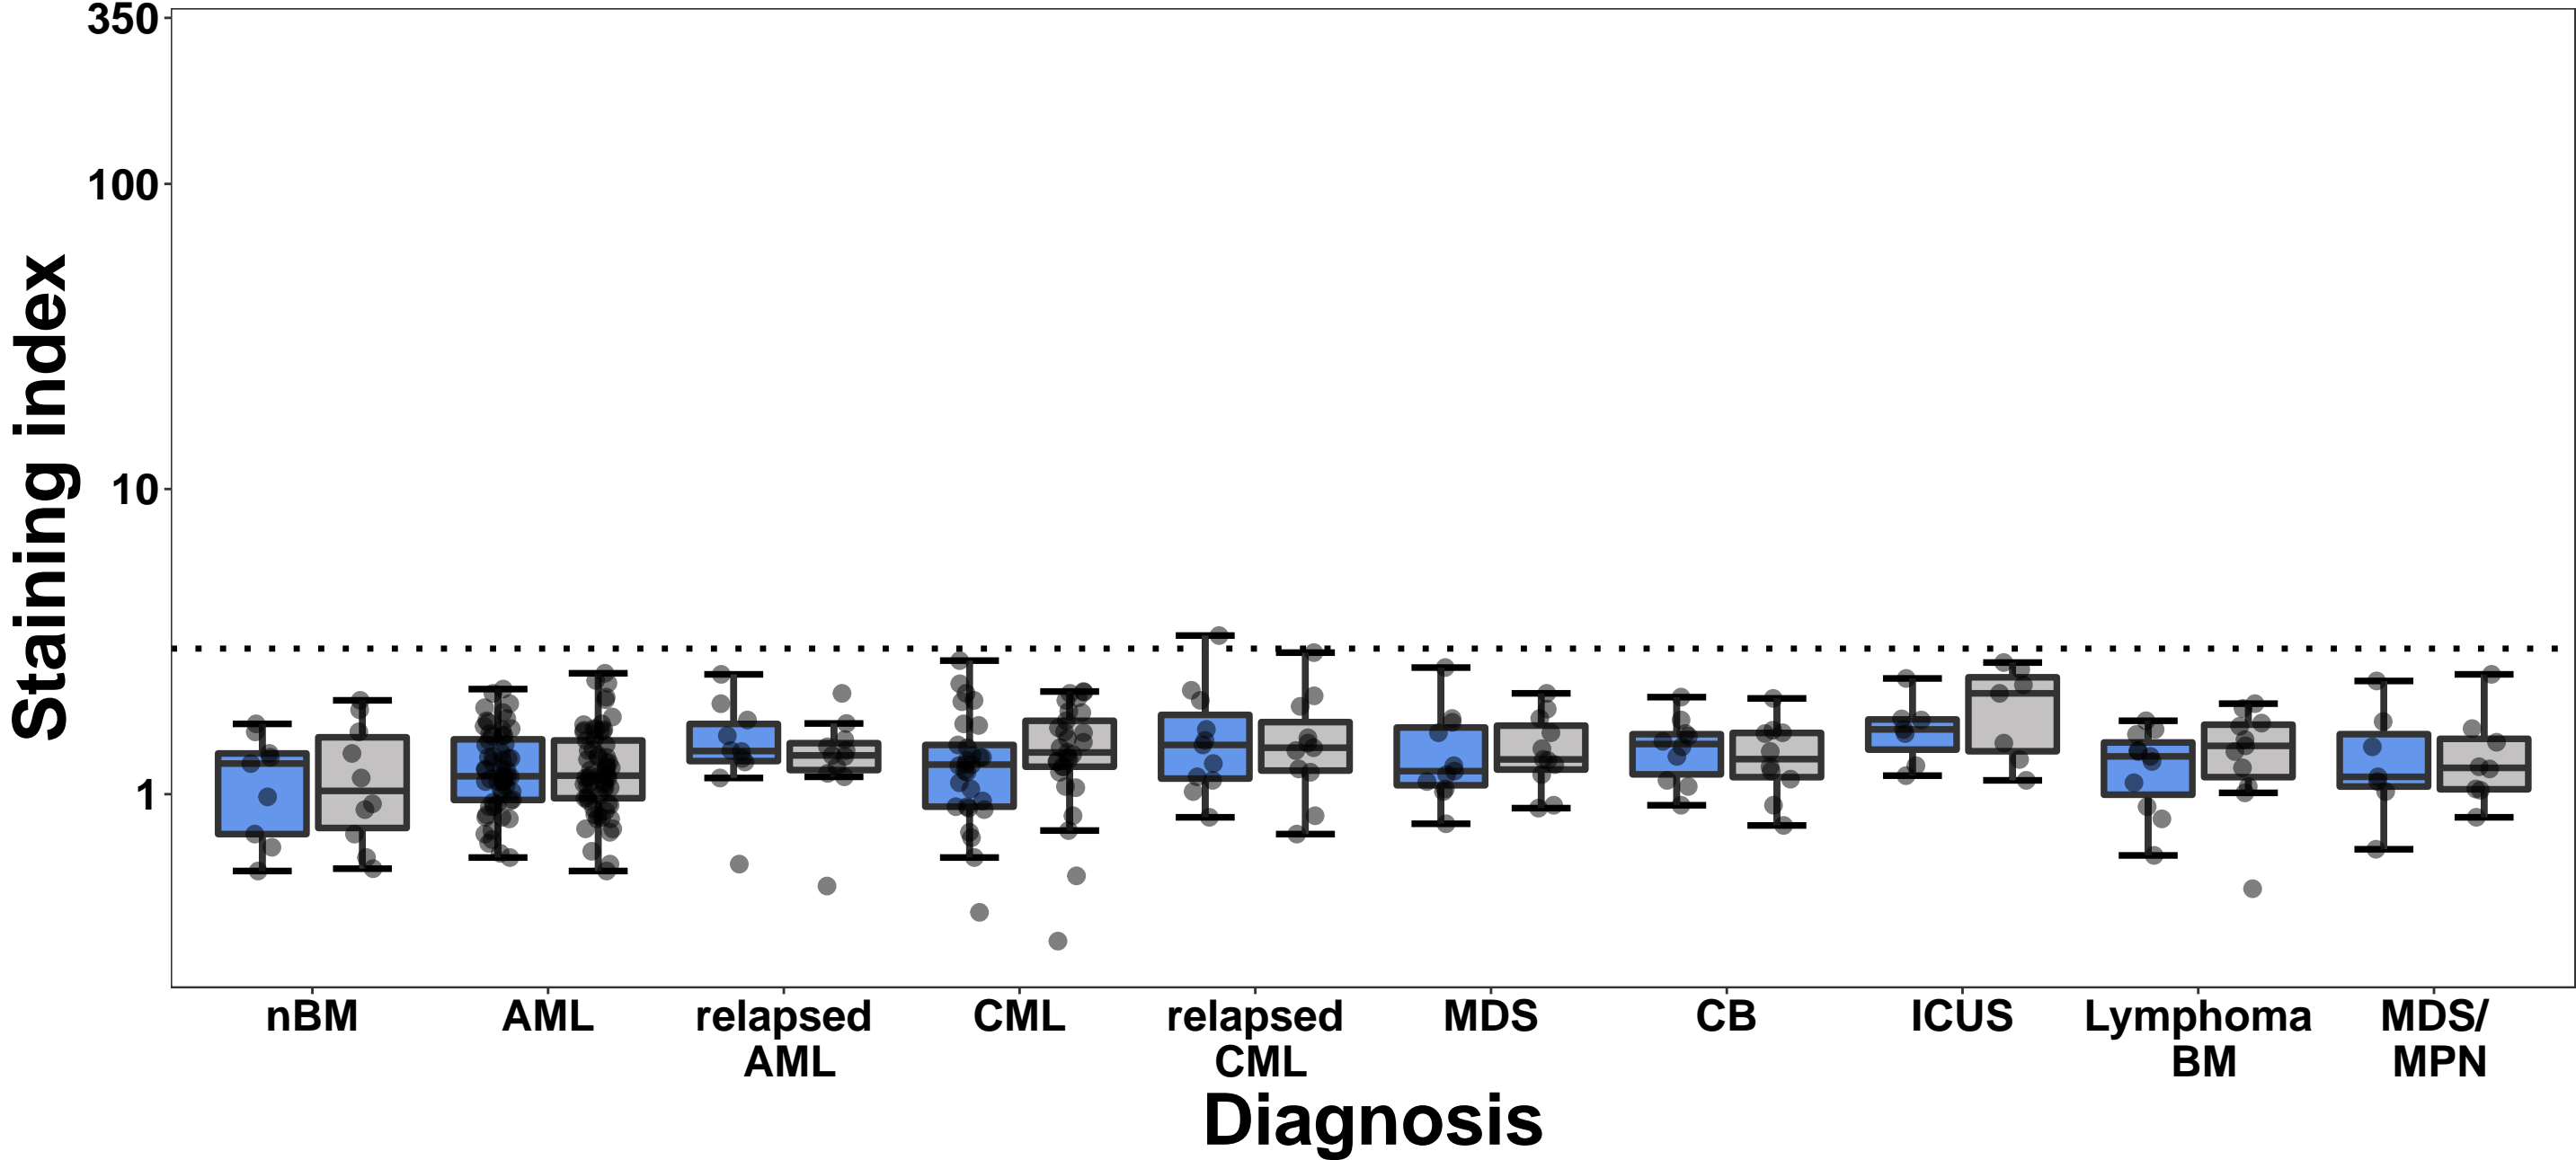

Cell fraction  CD34+/CD38-  CD34+/CD38+

# CD243 percentage

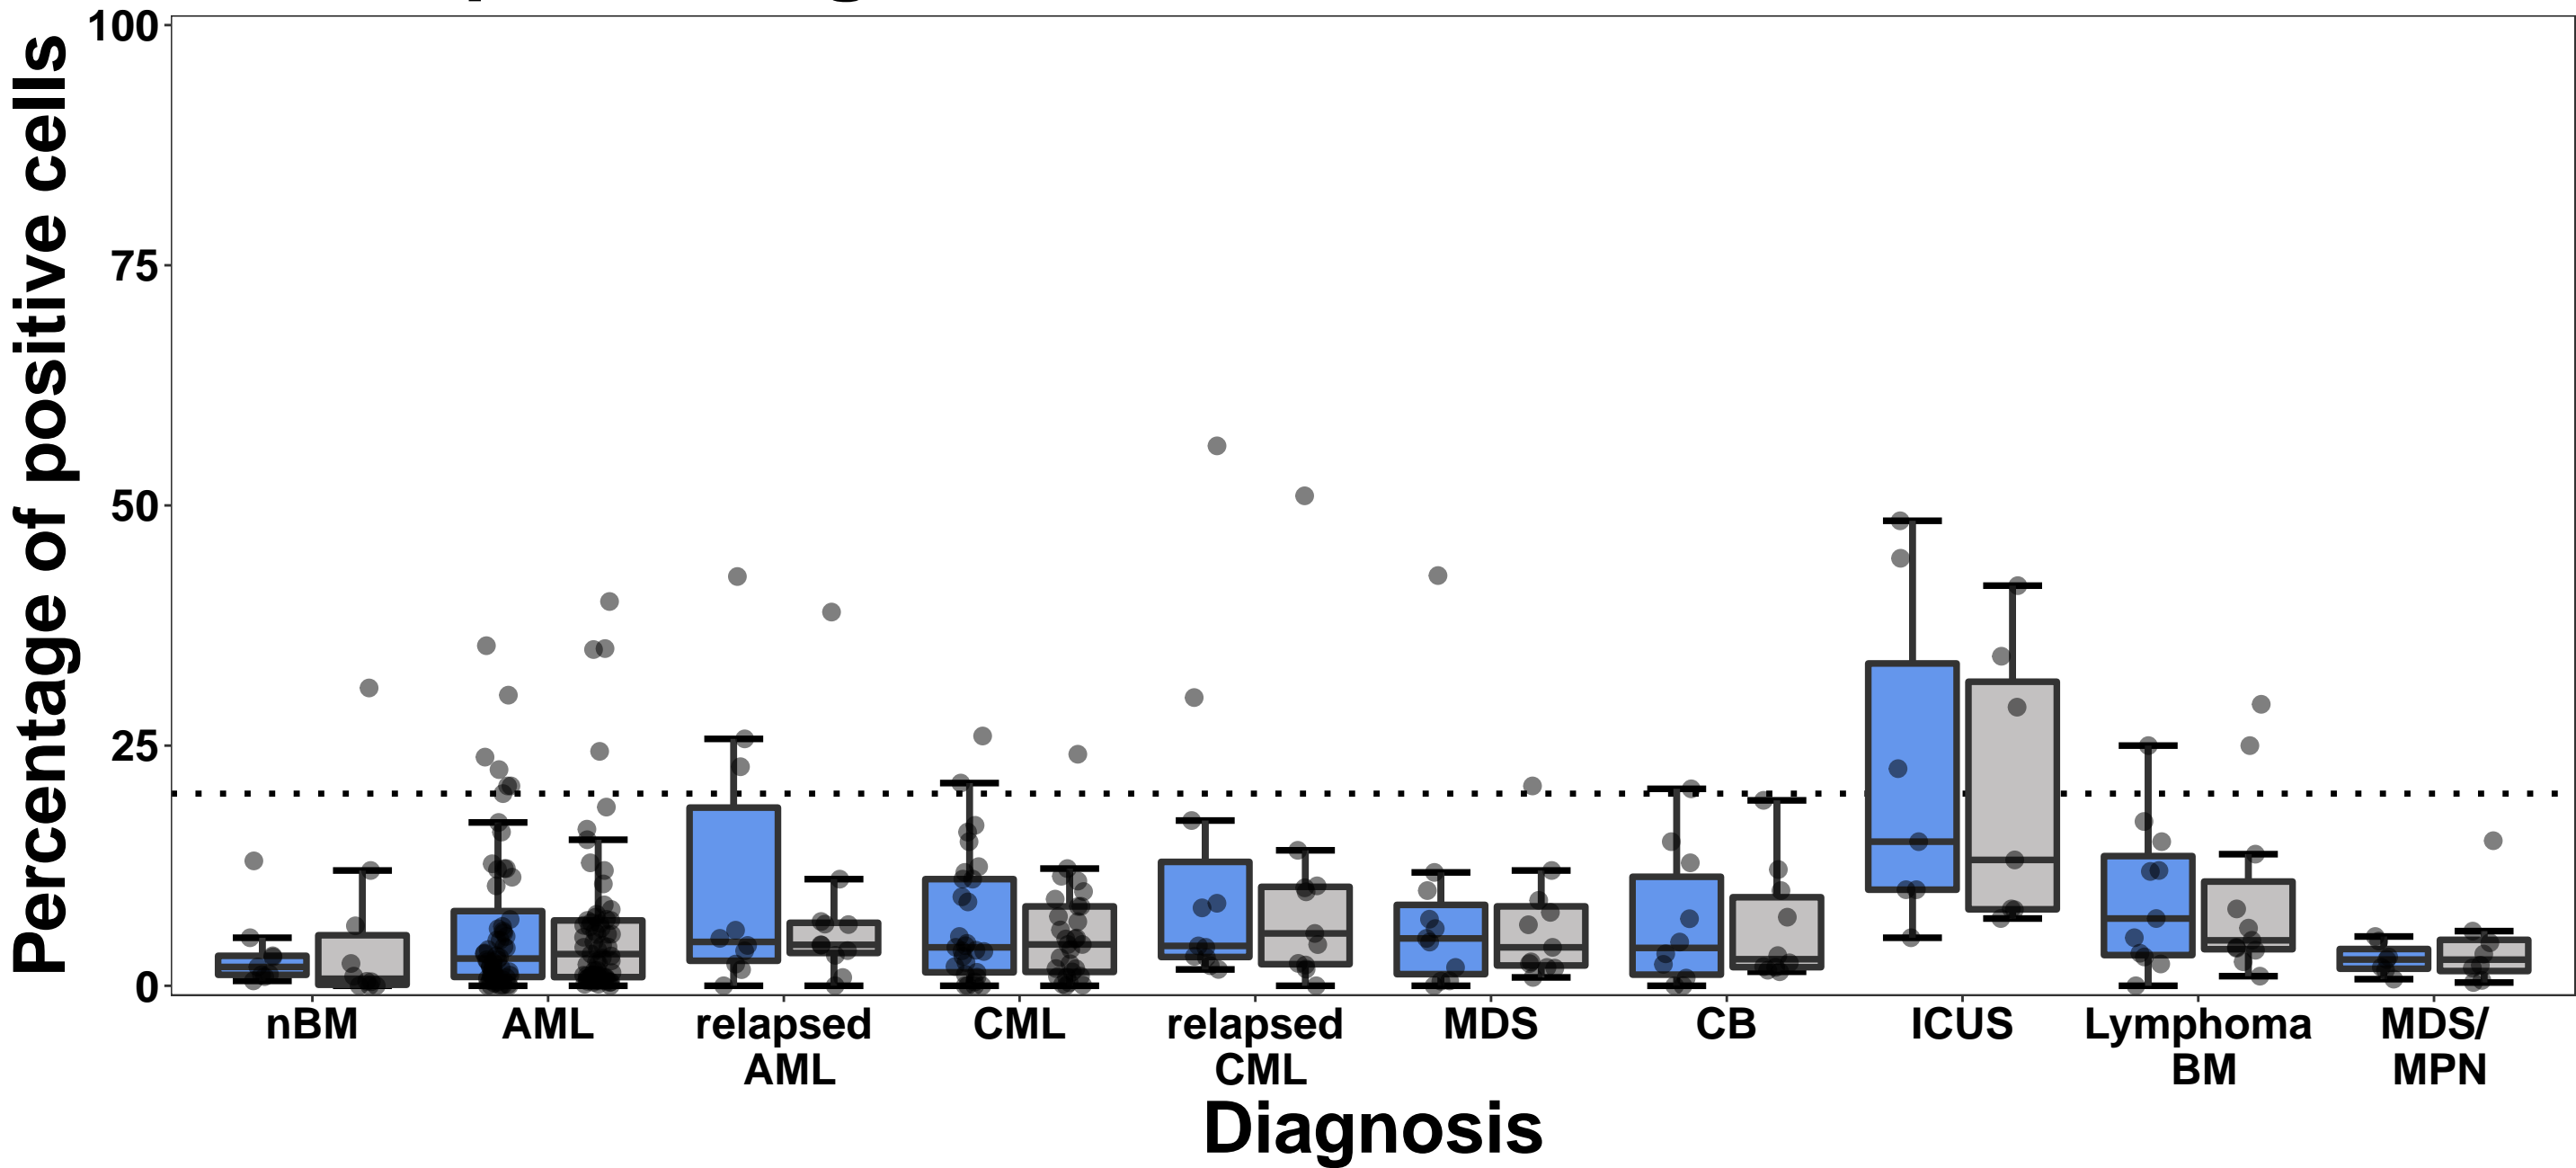

# CD252 staining index

Cell fraction  CD34+/CD38-  CD34+/CD38+

Staining index

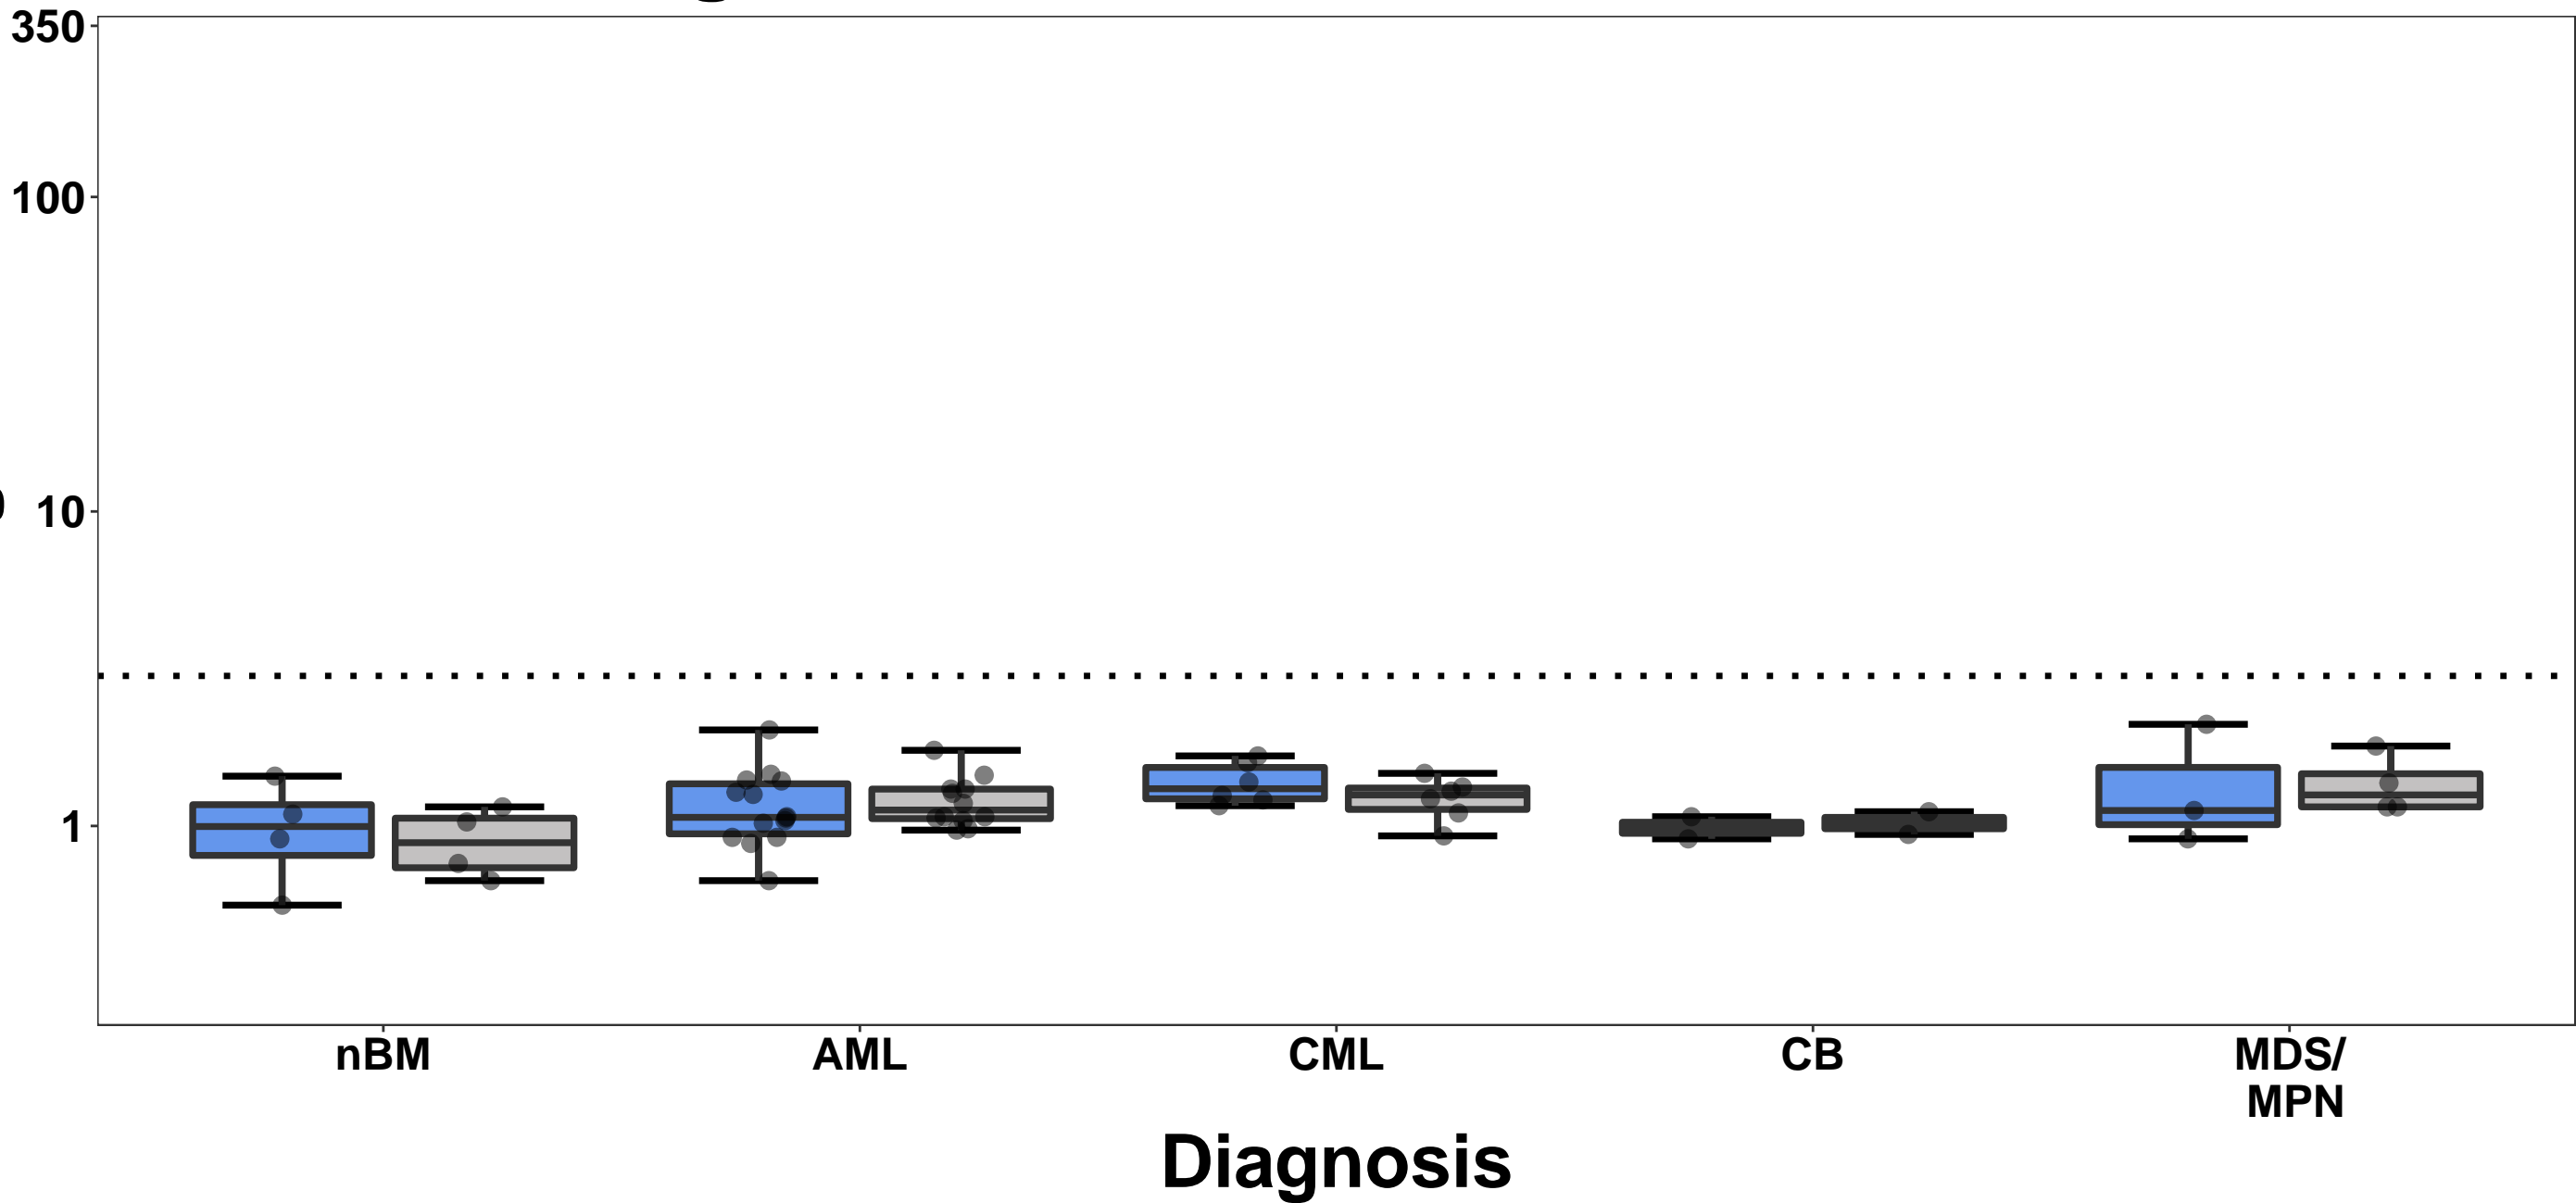

Cell fraction  CD34+/CD38-  CD34+/CD38+

# CD252 percentage

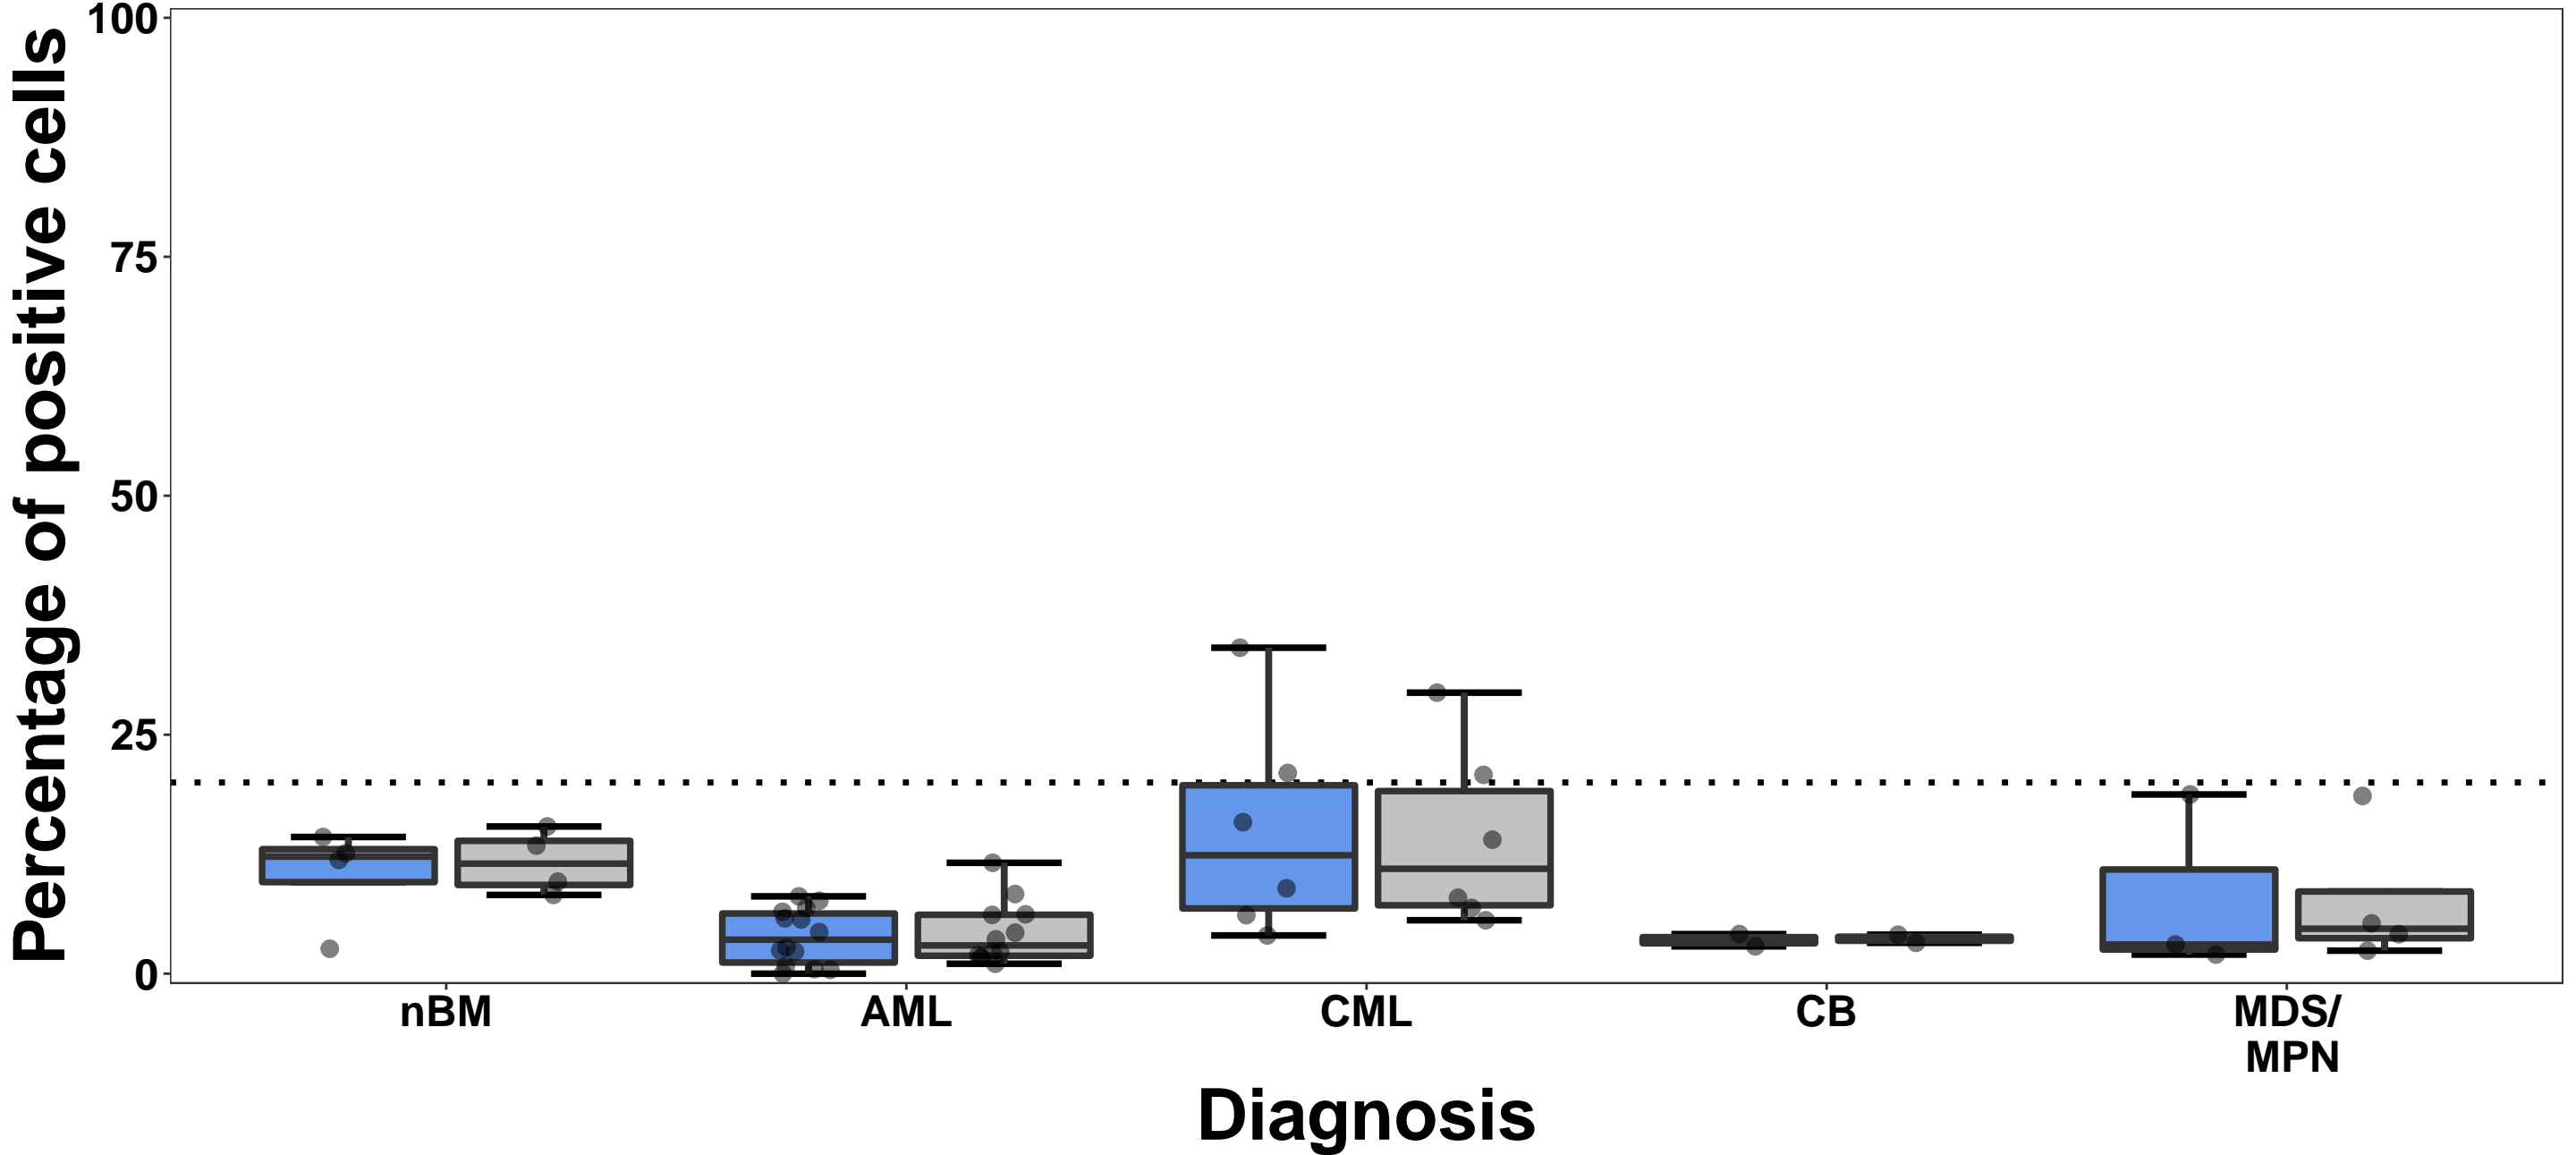

Cell fraction  CD34+/CD38-  CD34+/CD38+

# CD271 staining index

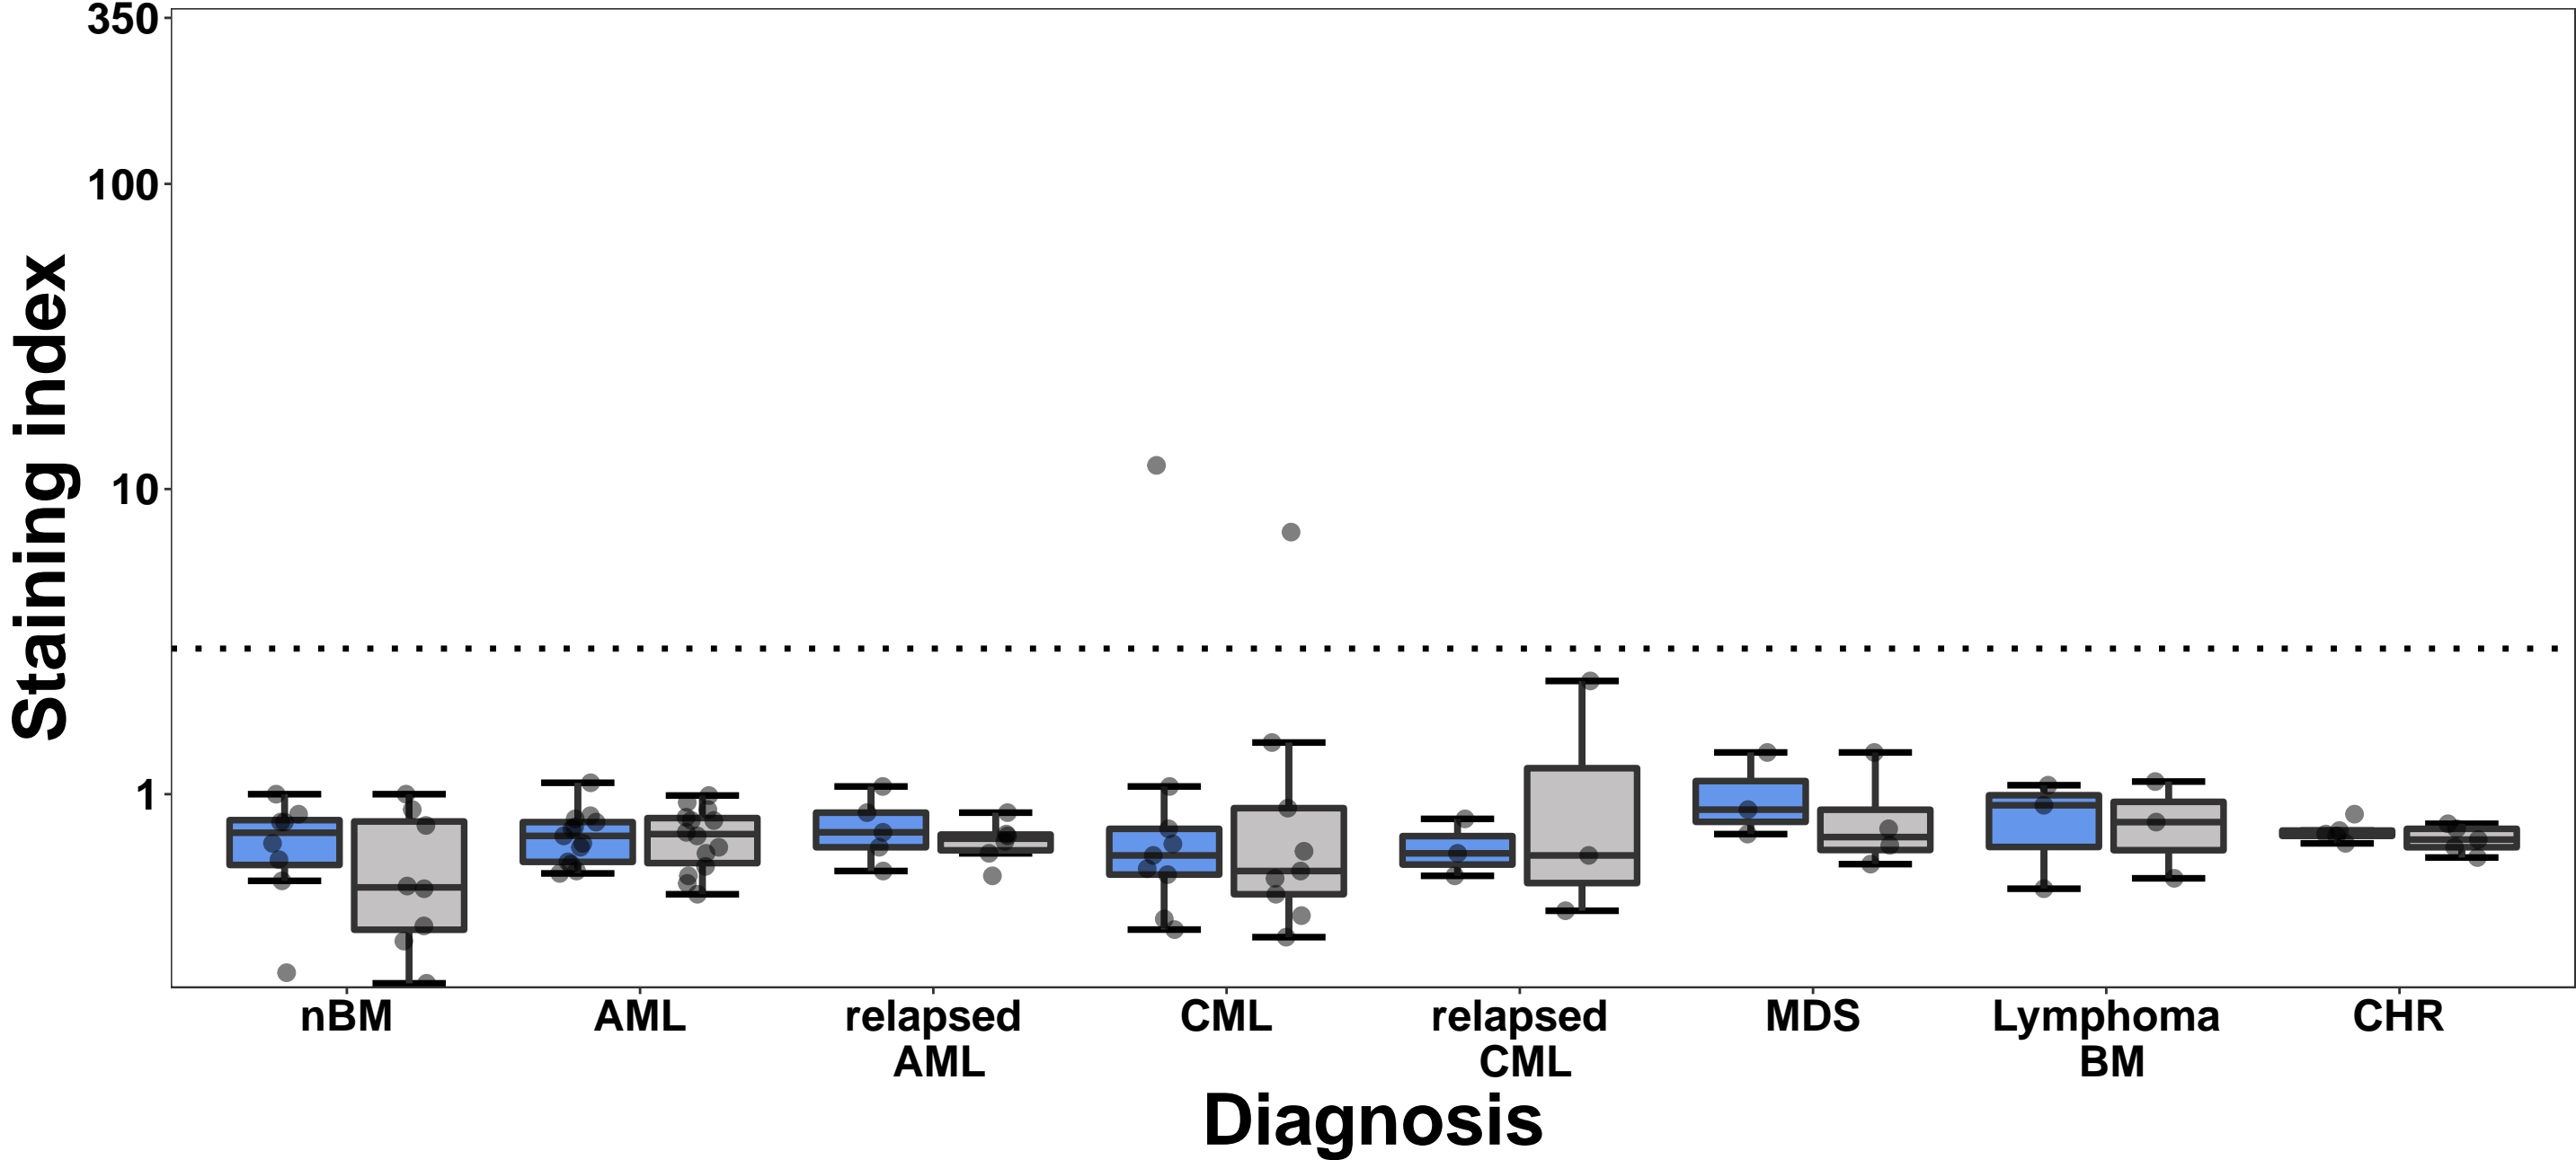

Cell fraction  CD34+/CD38-  CD34+/CD38+

# CD271 percentage

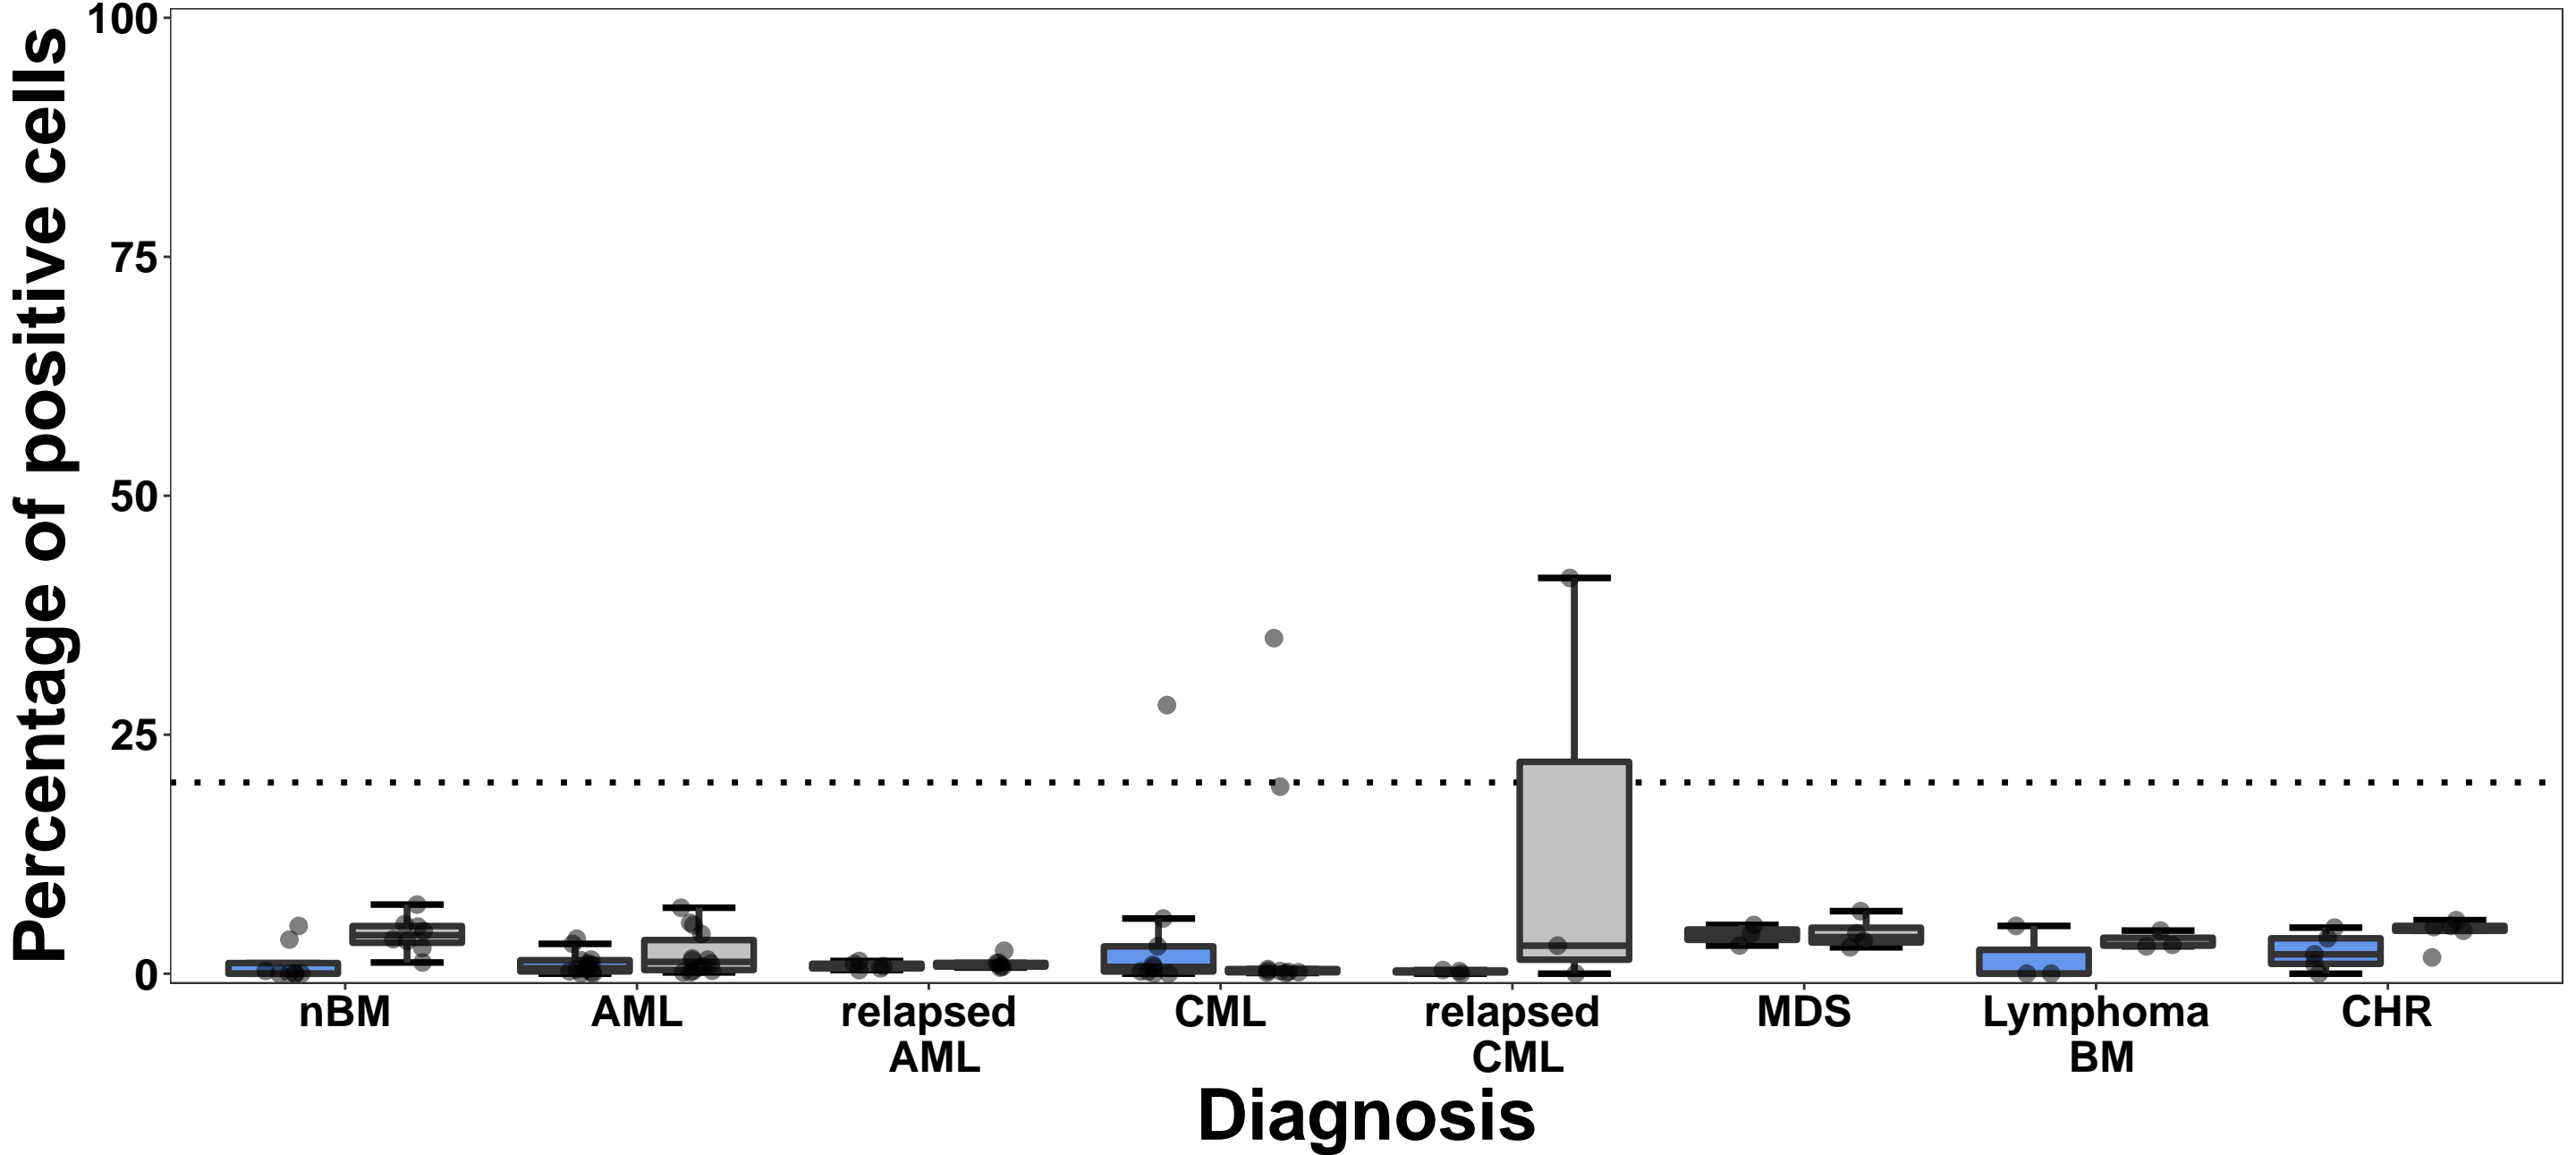

# CD273 staining index

Cell fraction  CD34+/CD38-  CD34+/CD38+

Staining index

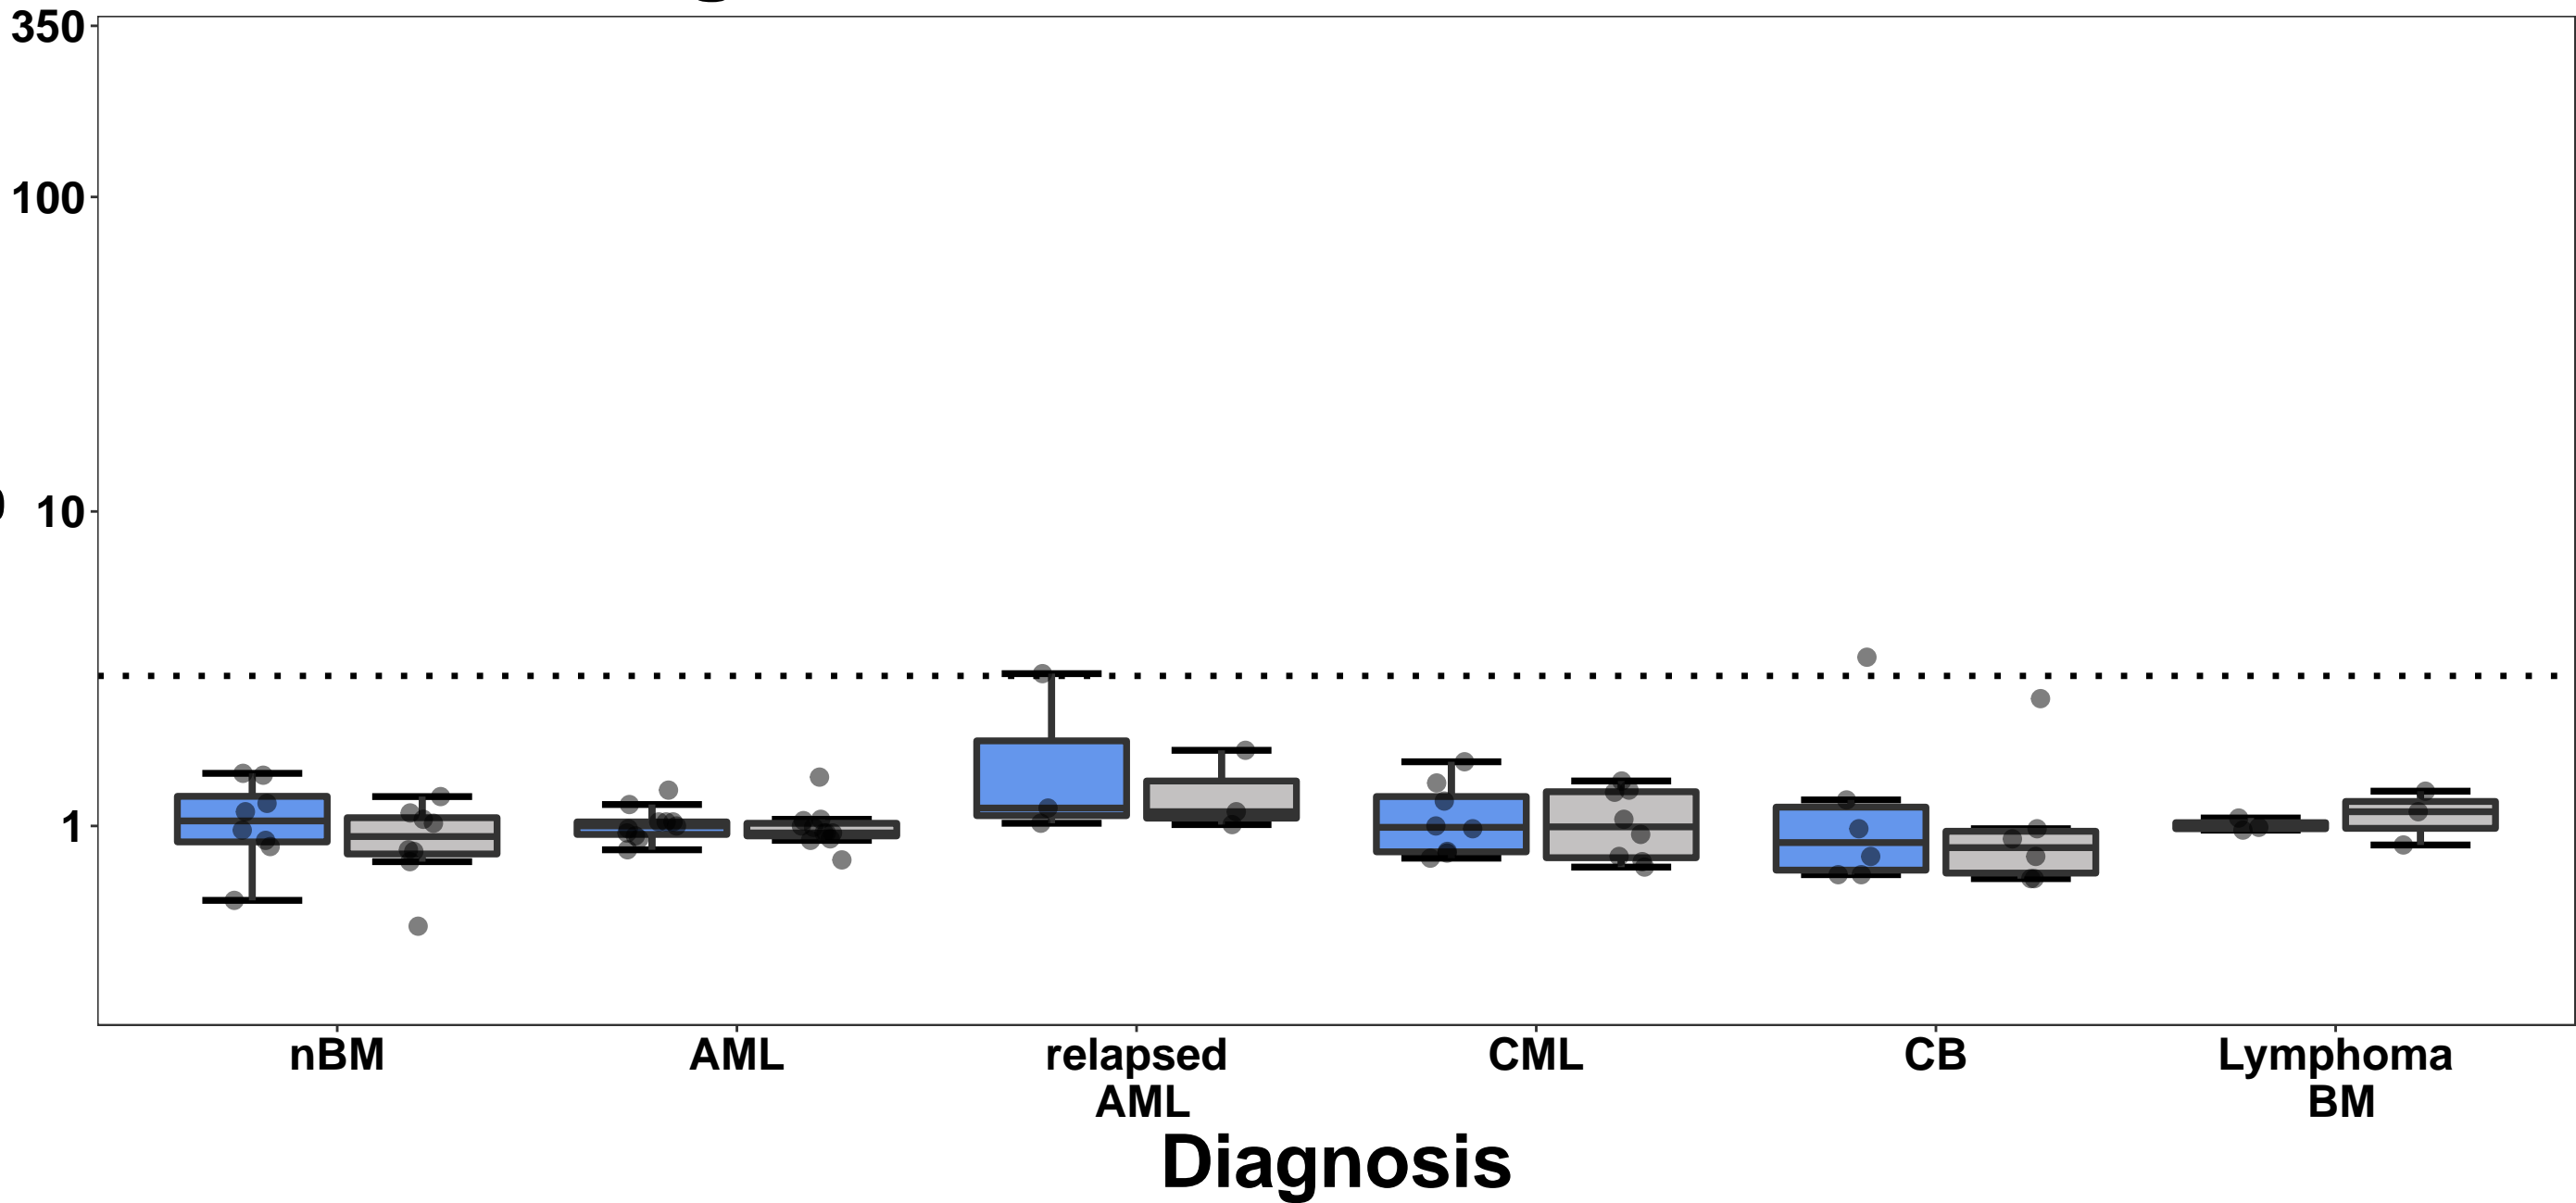



Cell fraction  CD34+/CD38-  CD34+/CD38+

# CD273 percentage

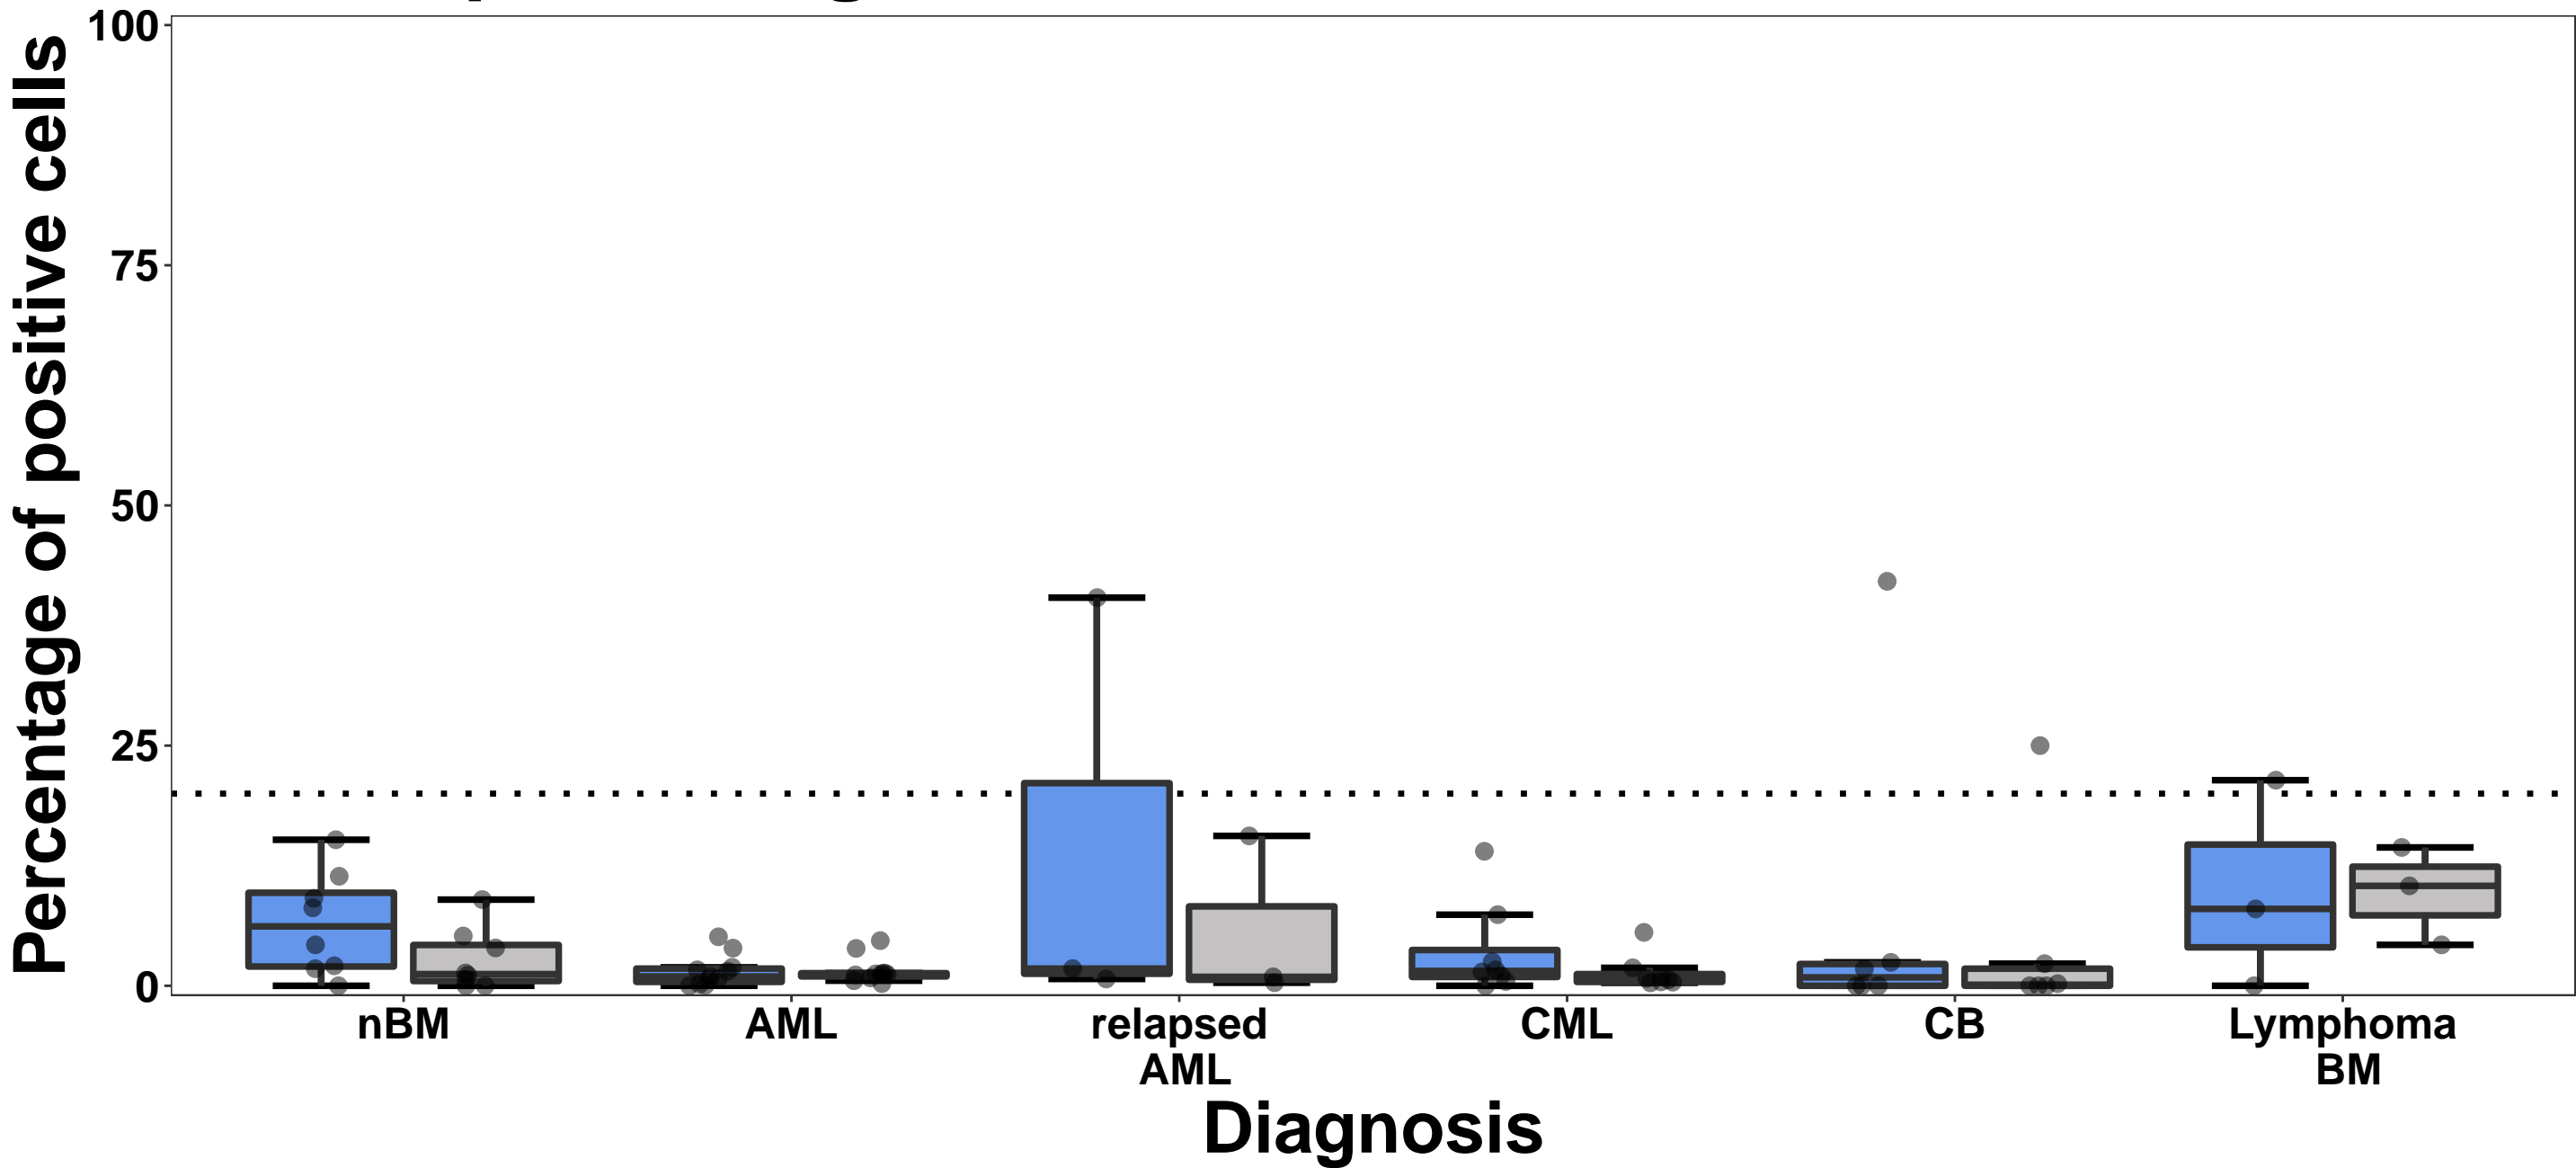

Cell fraction  CD34+/CD38-  CD34+/CD38+

# CD274 staining index

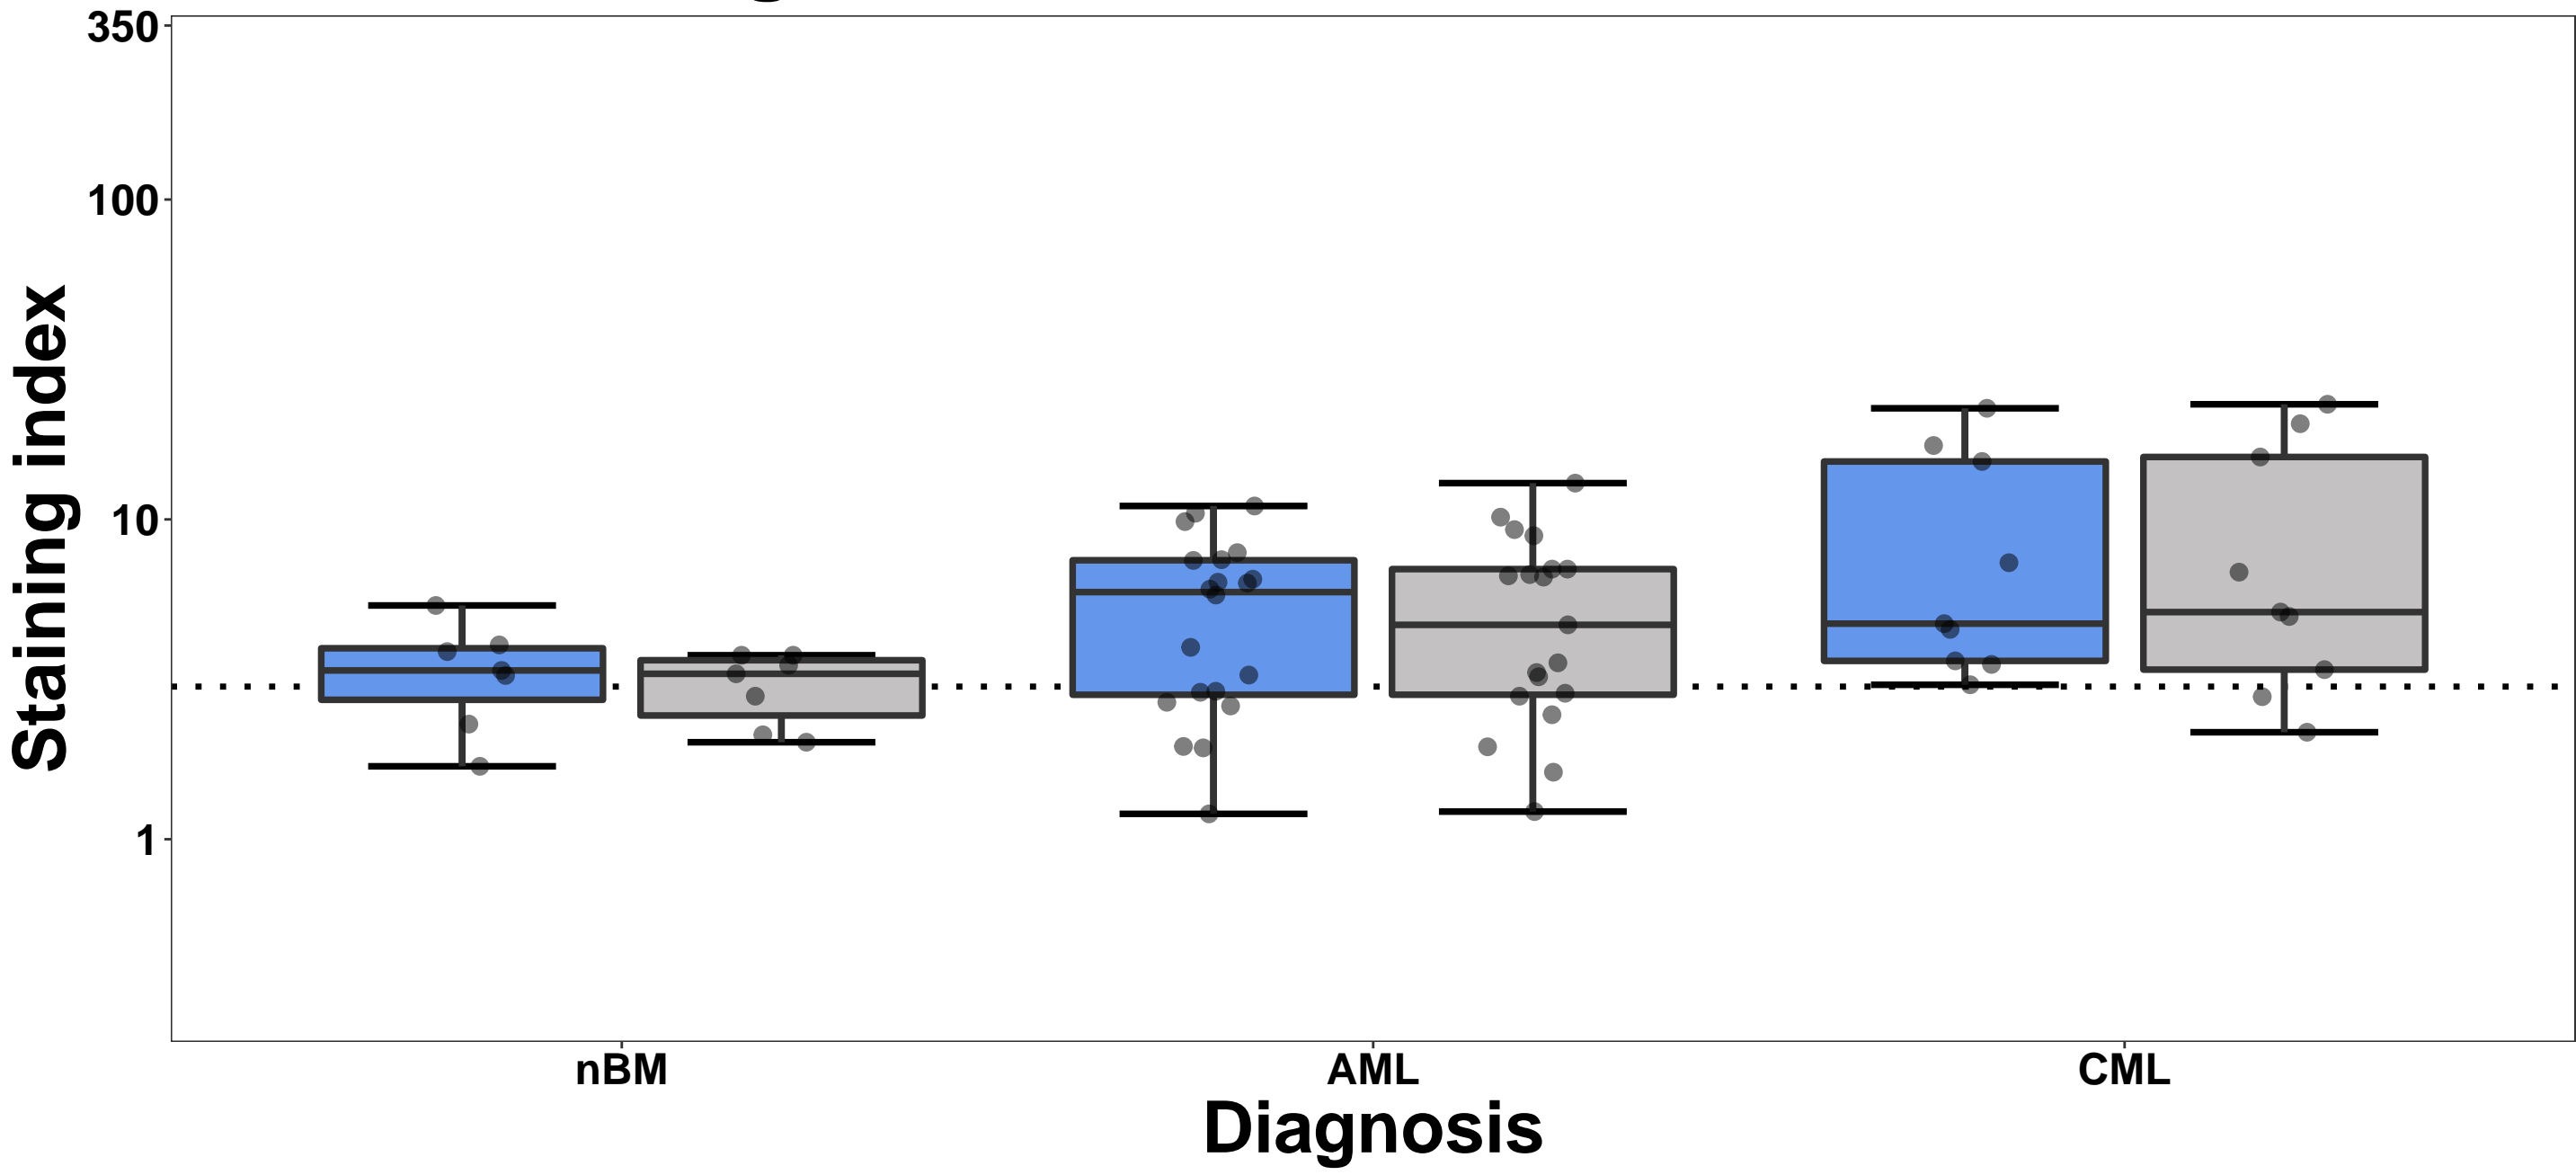

Cell fraction  CD34+/CD38-  CD34+/CD38+

# CD274 percentage

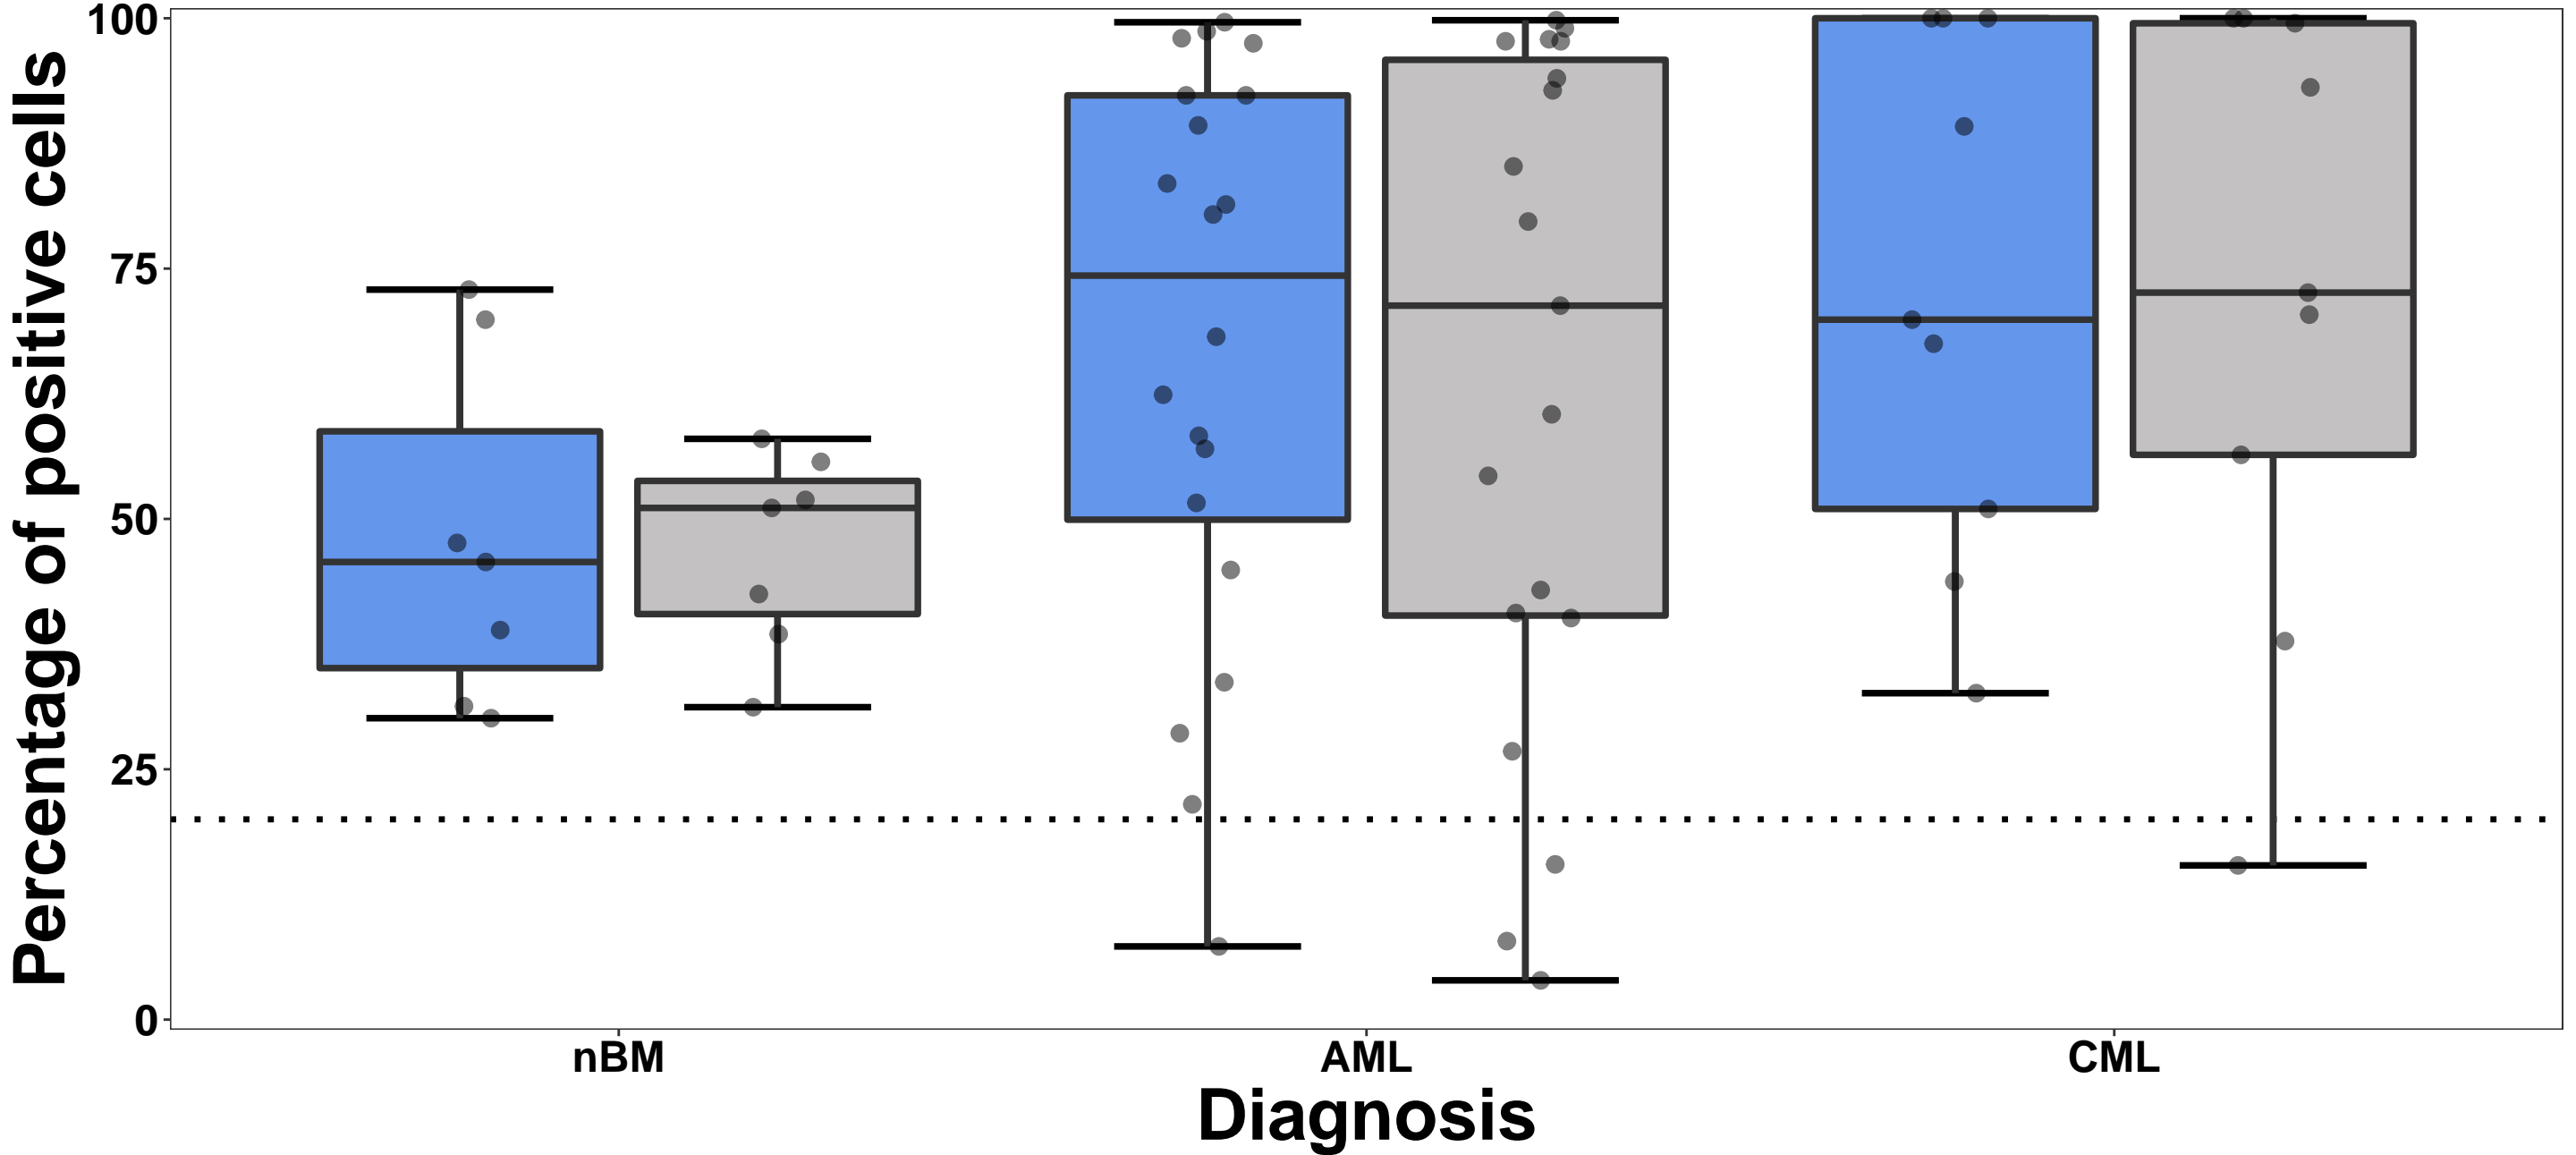

Cell fraction  CD34+/CD38-  CD34+/CD38+

# CD279 staining index

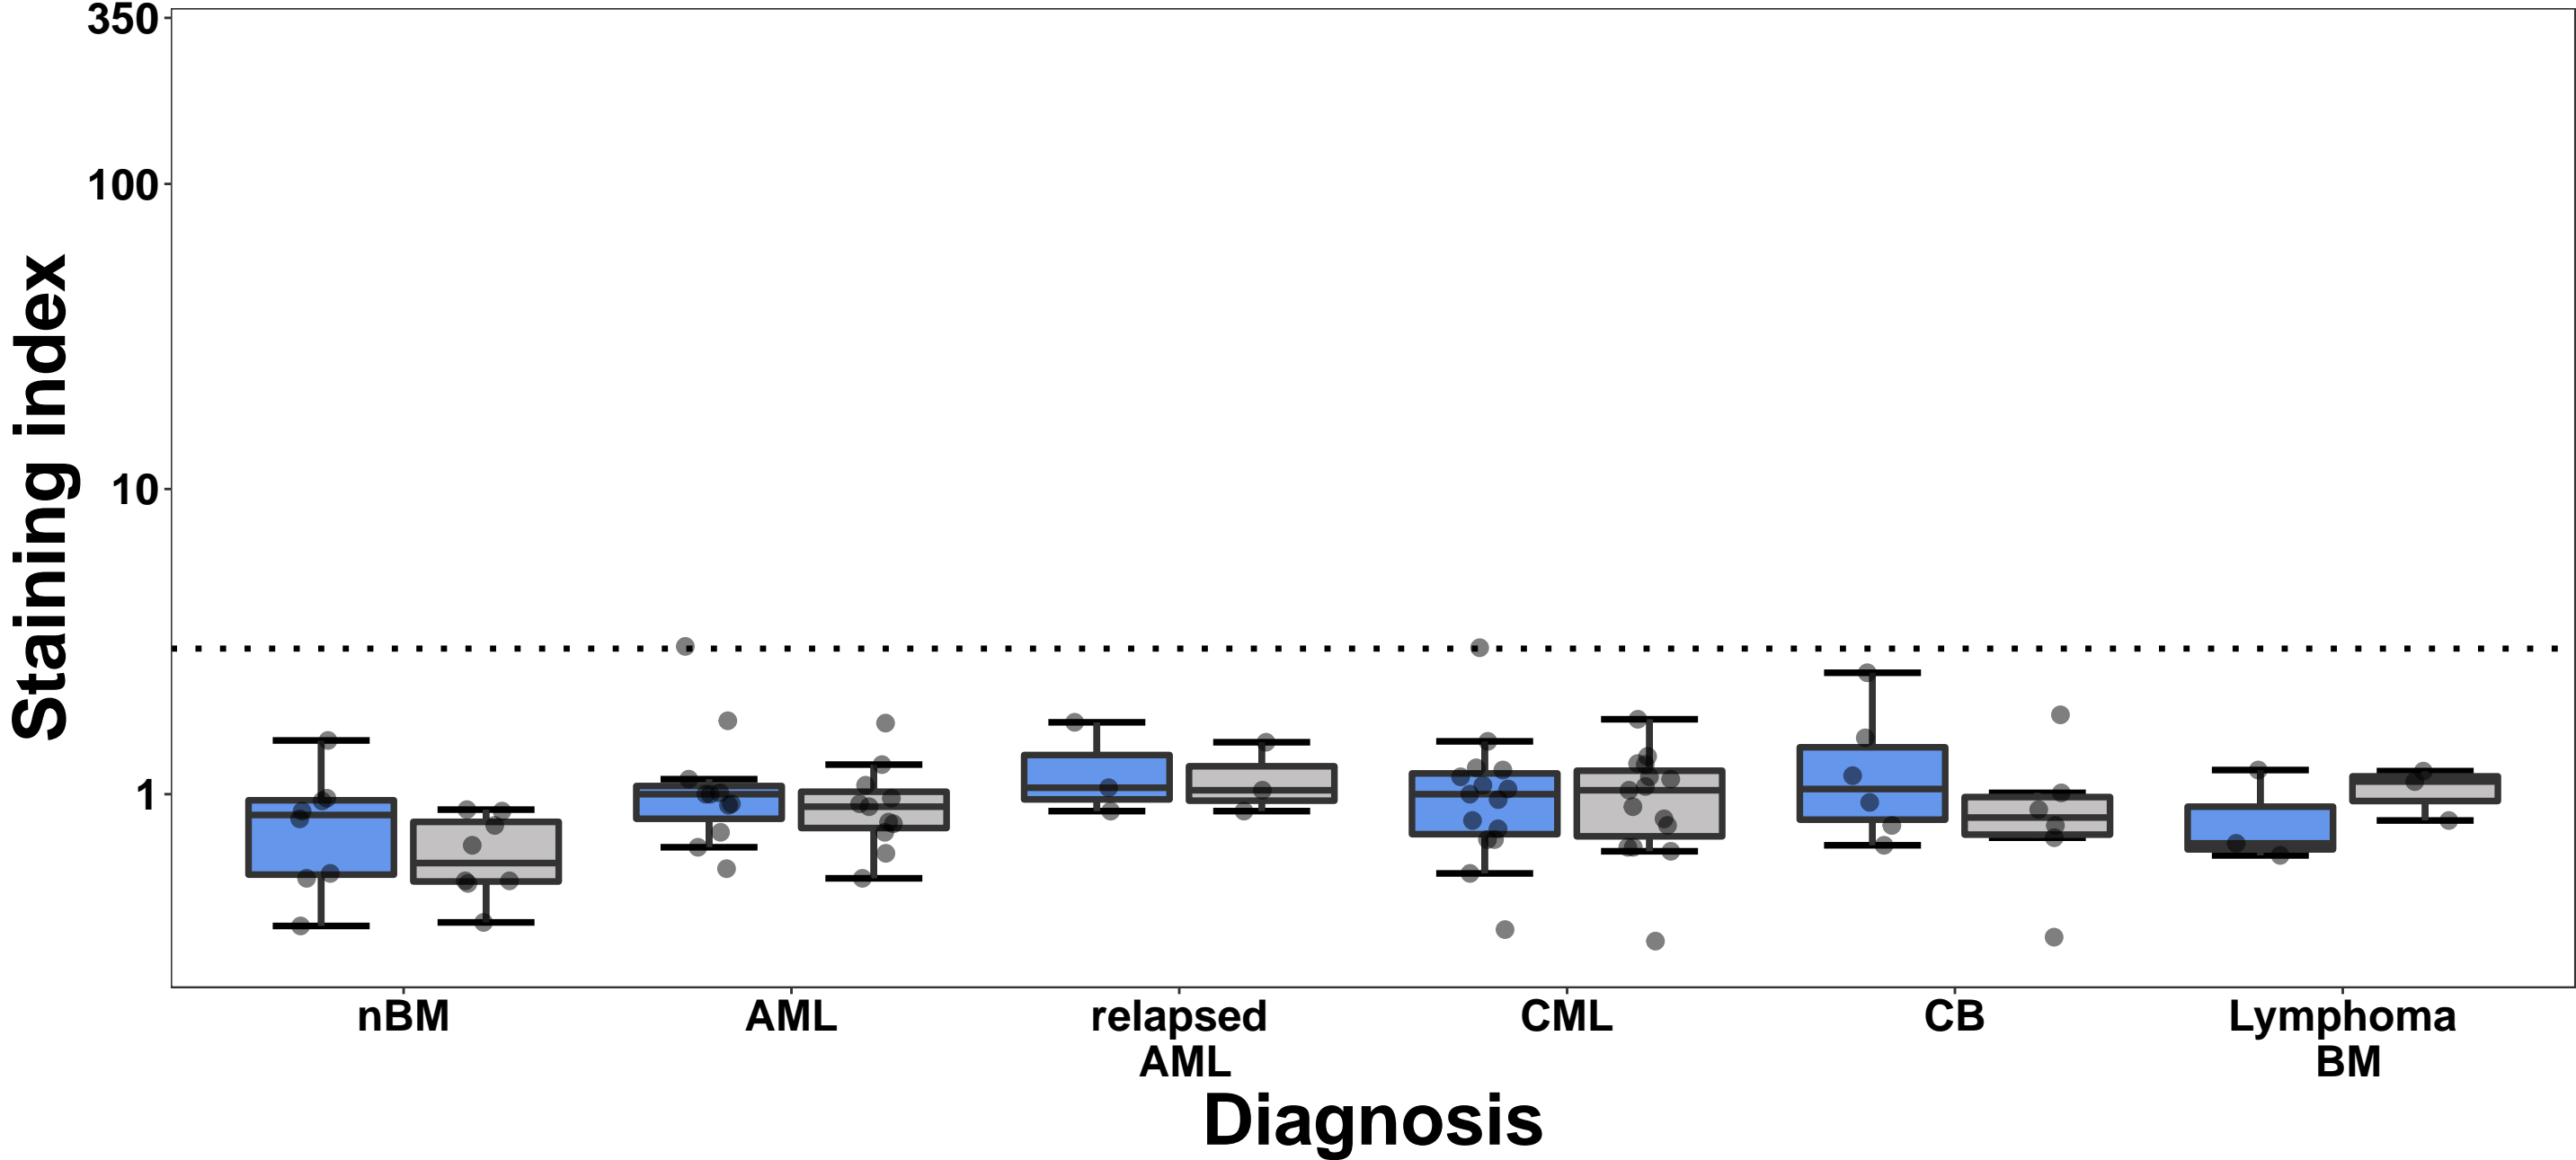

Cell fraction  CD34+/CD38-  CD34+/CD38+

# CD279 percentage

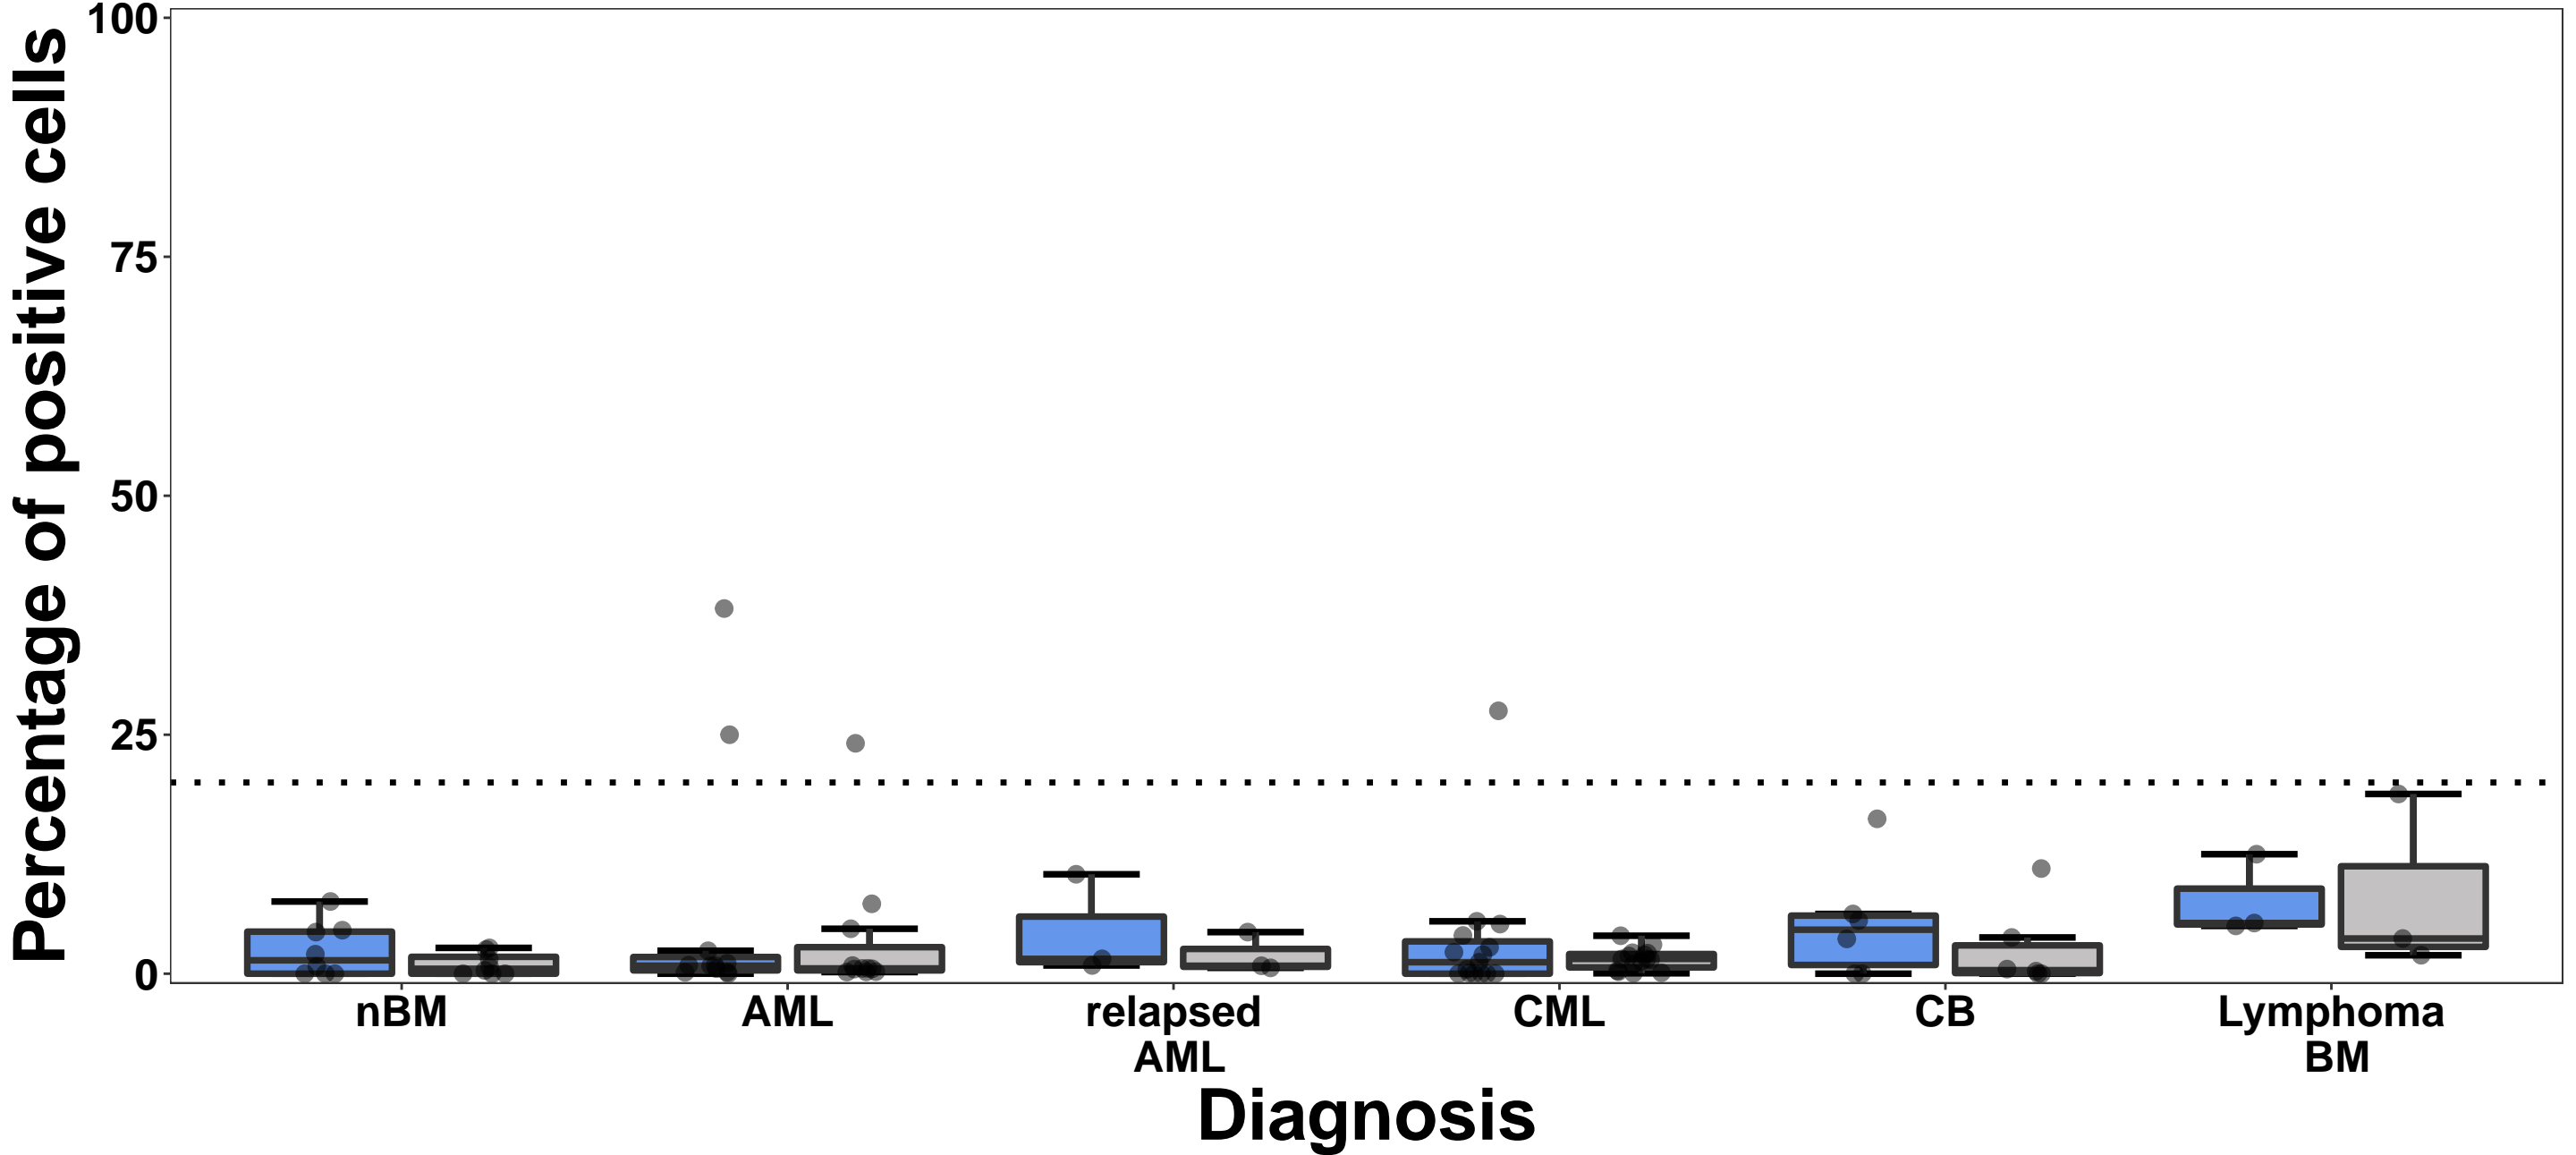

Cell fraction  CD34+/CD38-  CD34+/CD38+

# CD300a staining index

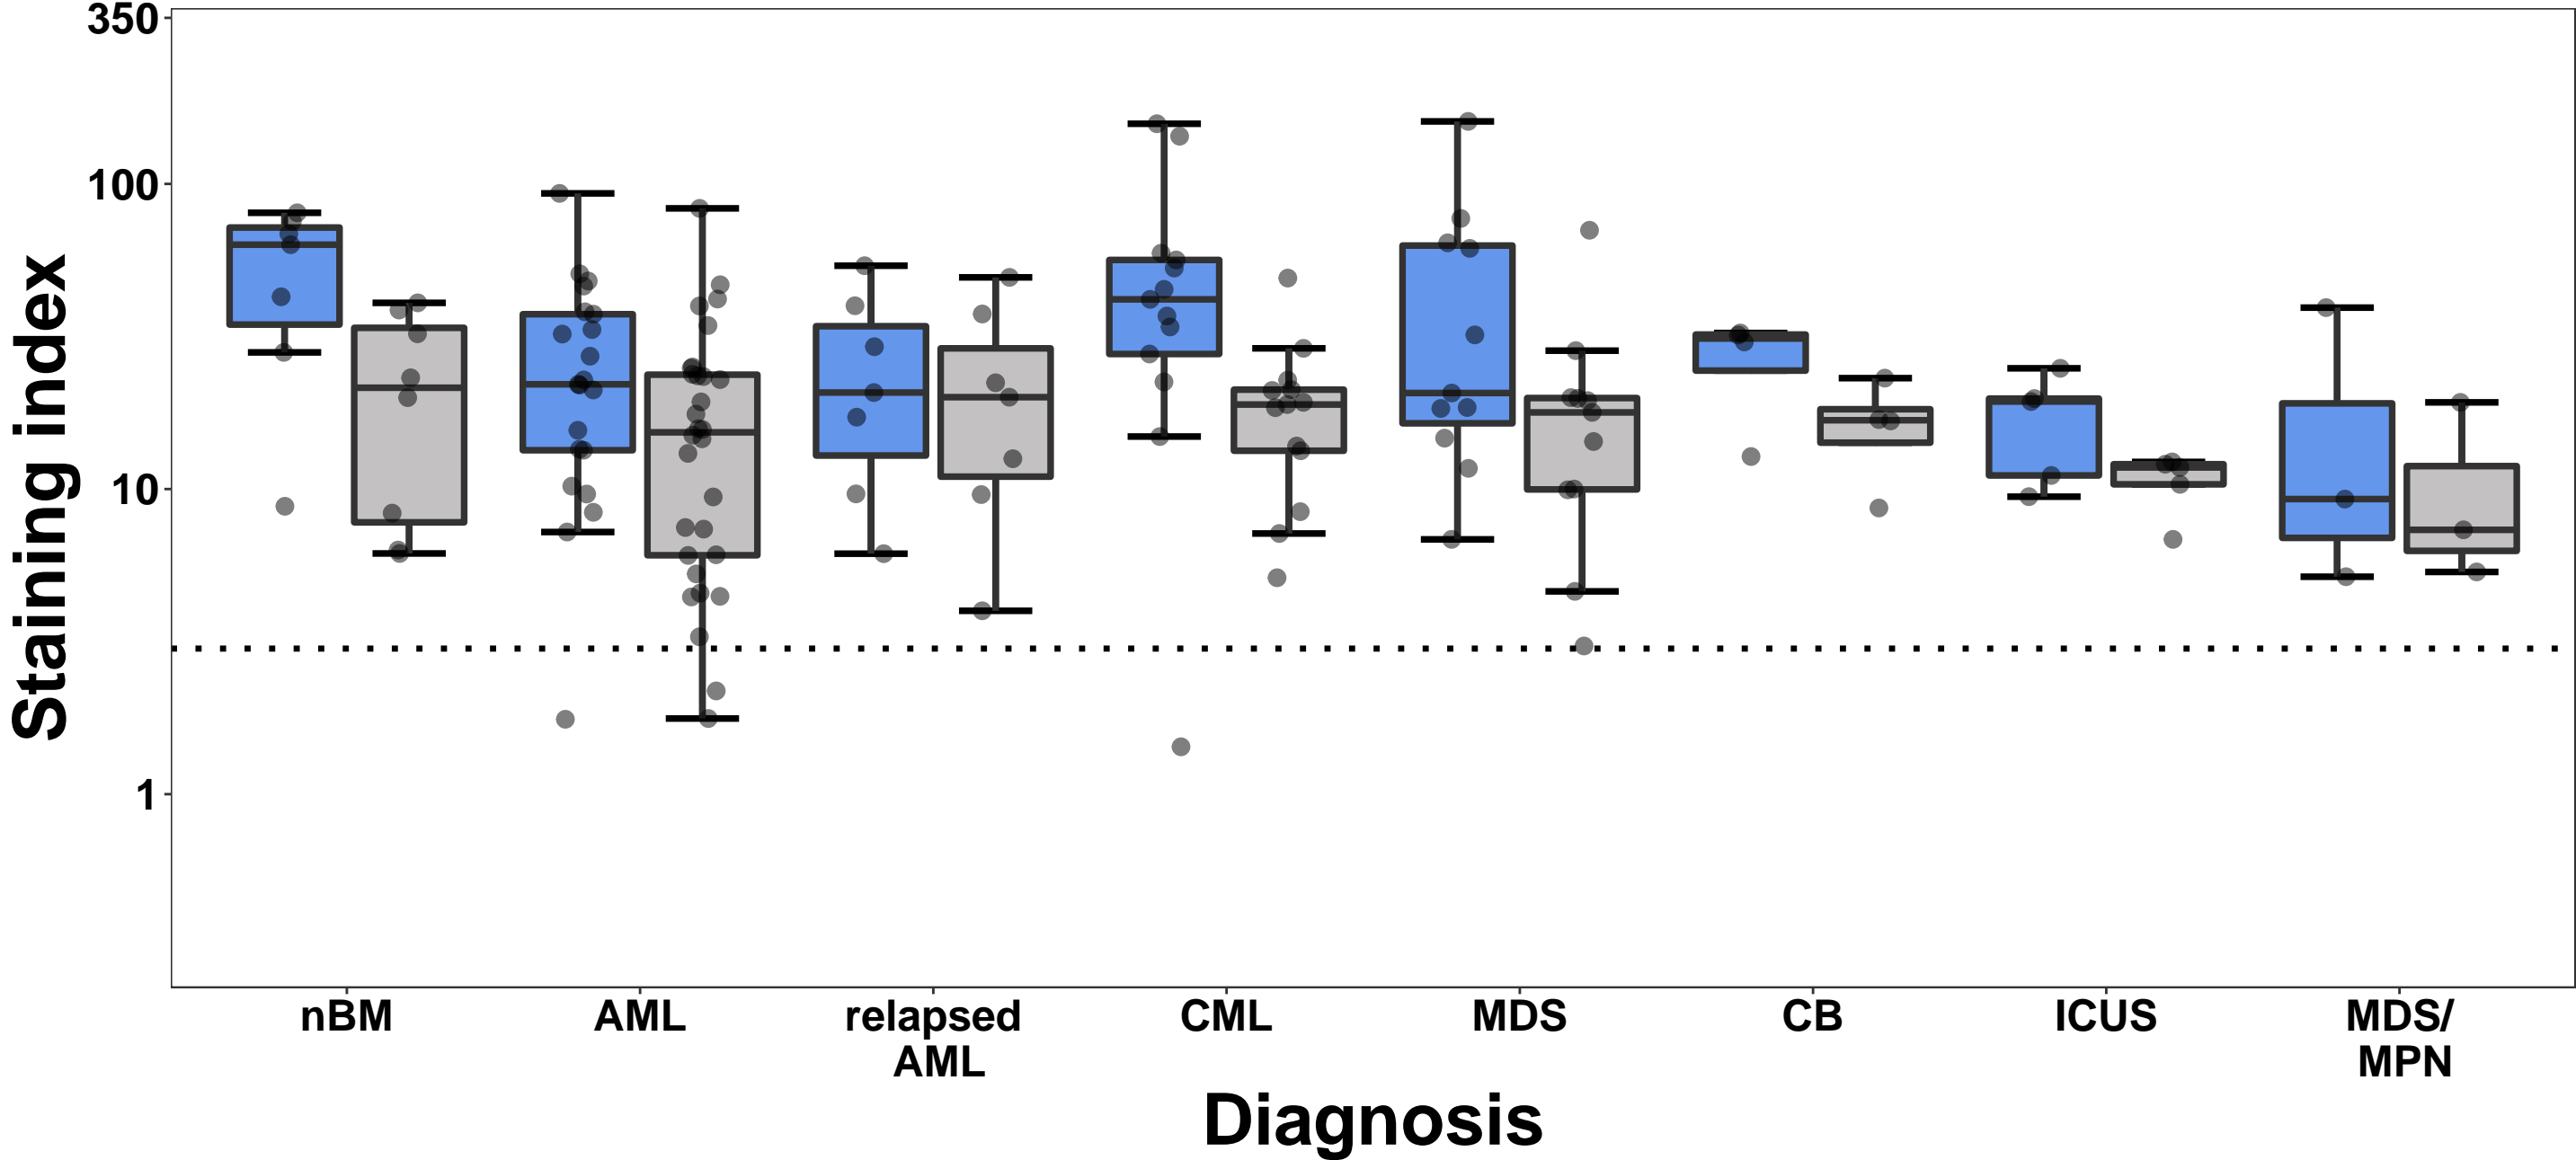

Cell fraction  CD34+/CD38-  CD34+/CD38+

# CD300a percentage

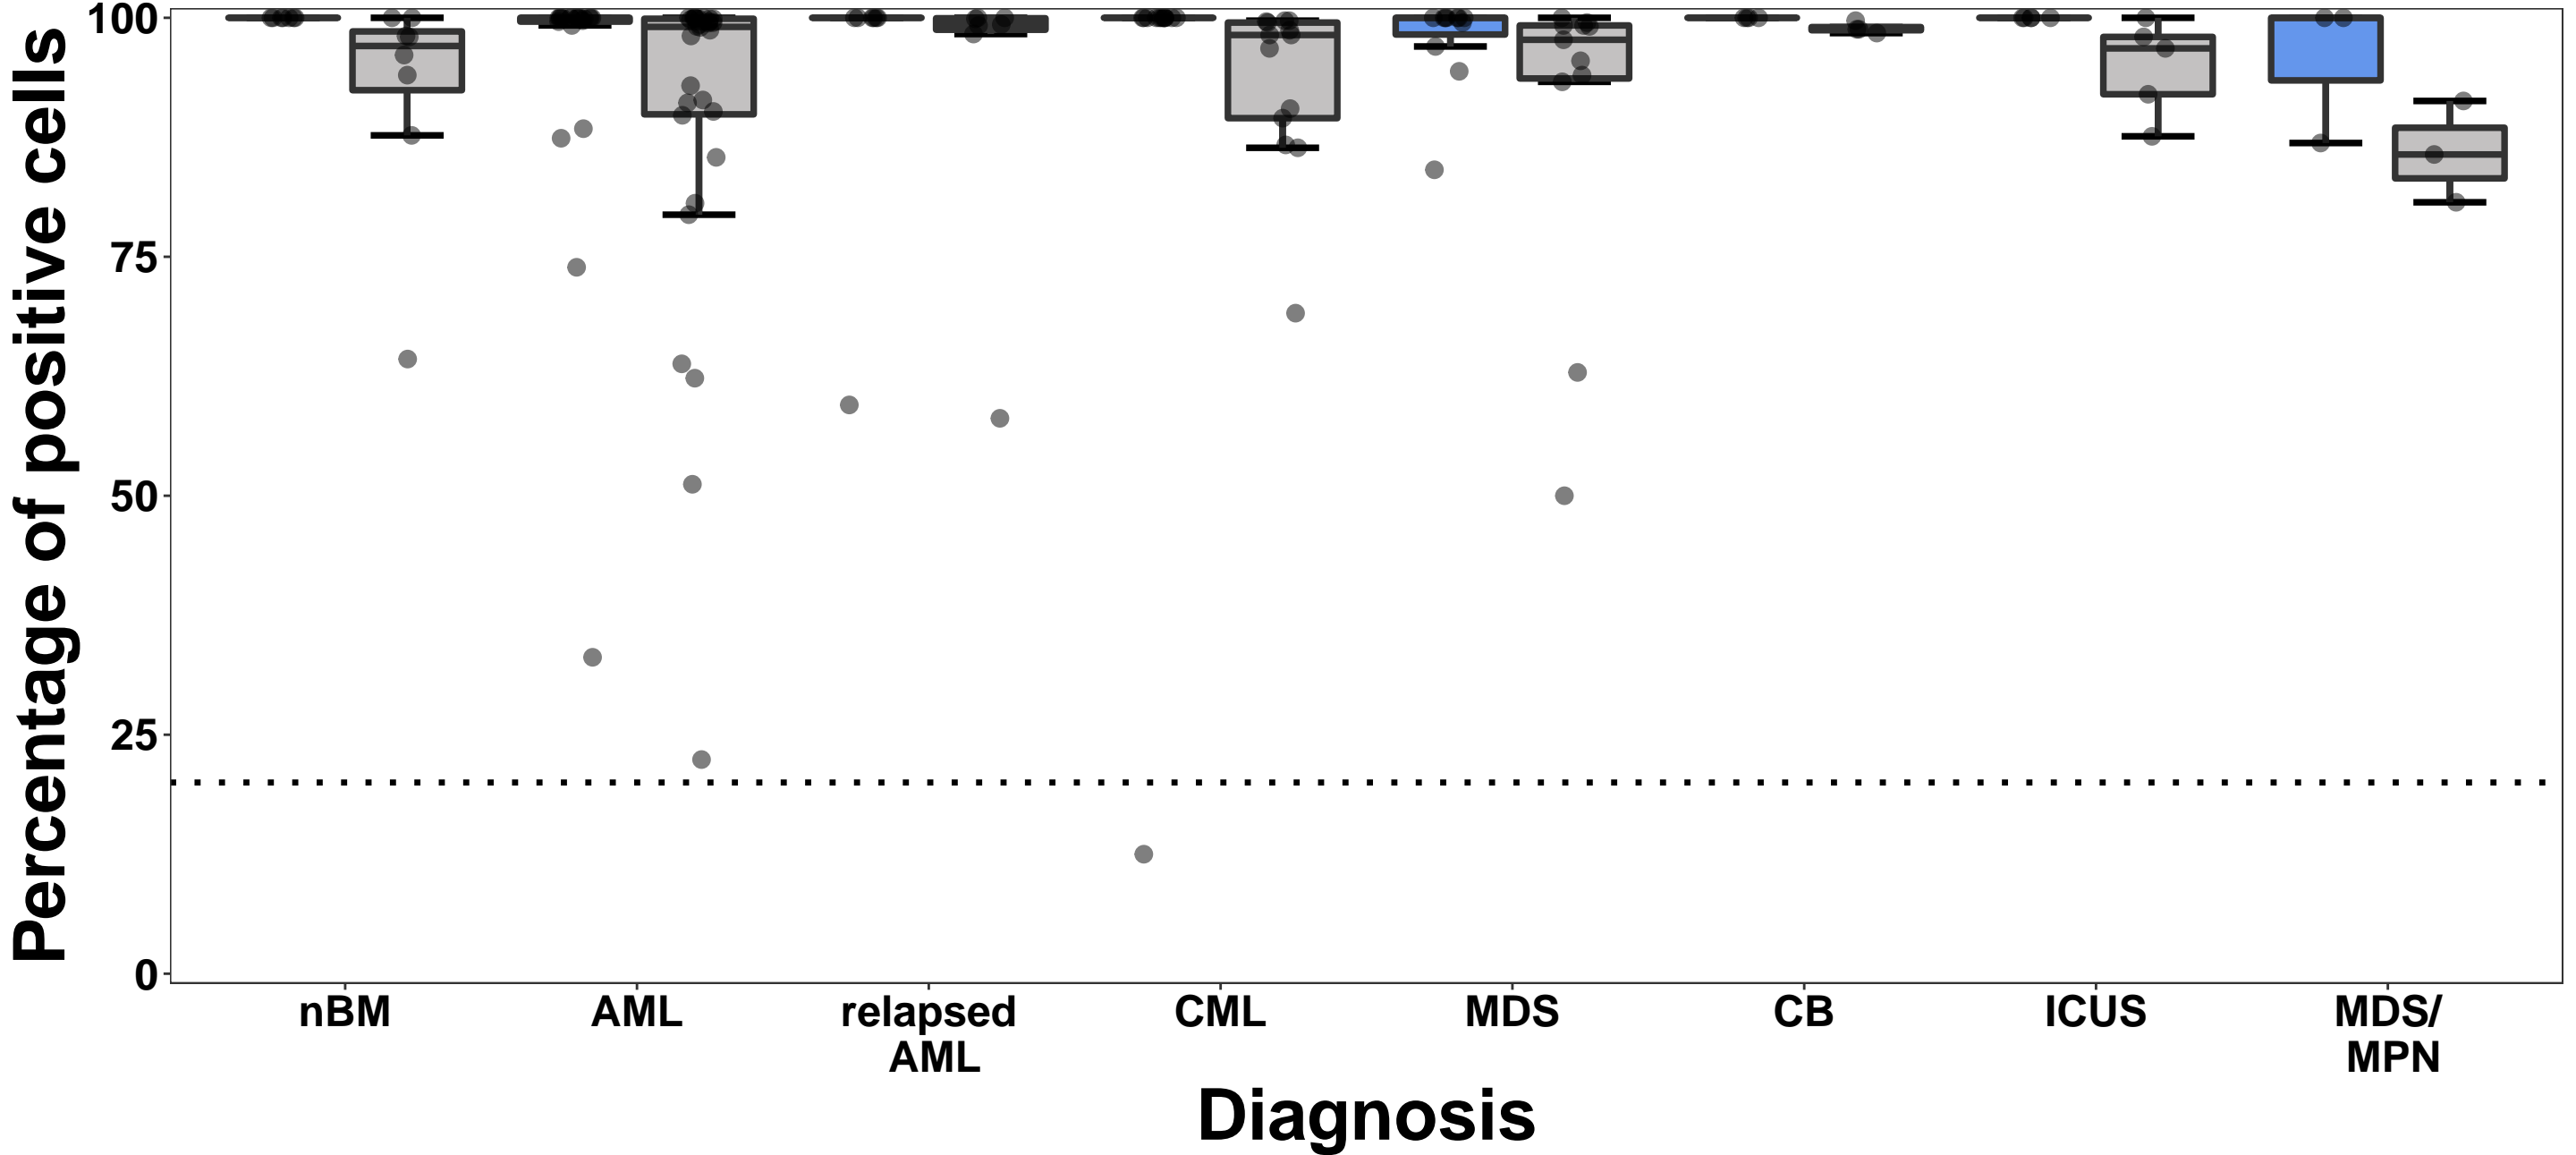

# CD309 staining index

Cell fraction  CD34+/CD38-  CD34+/CD38+

Staining index

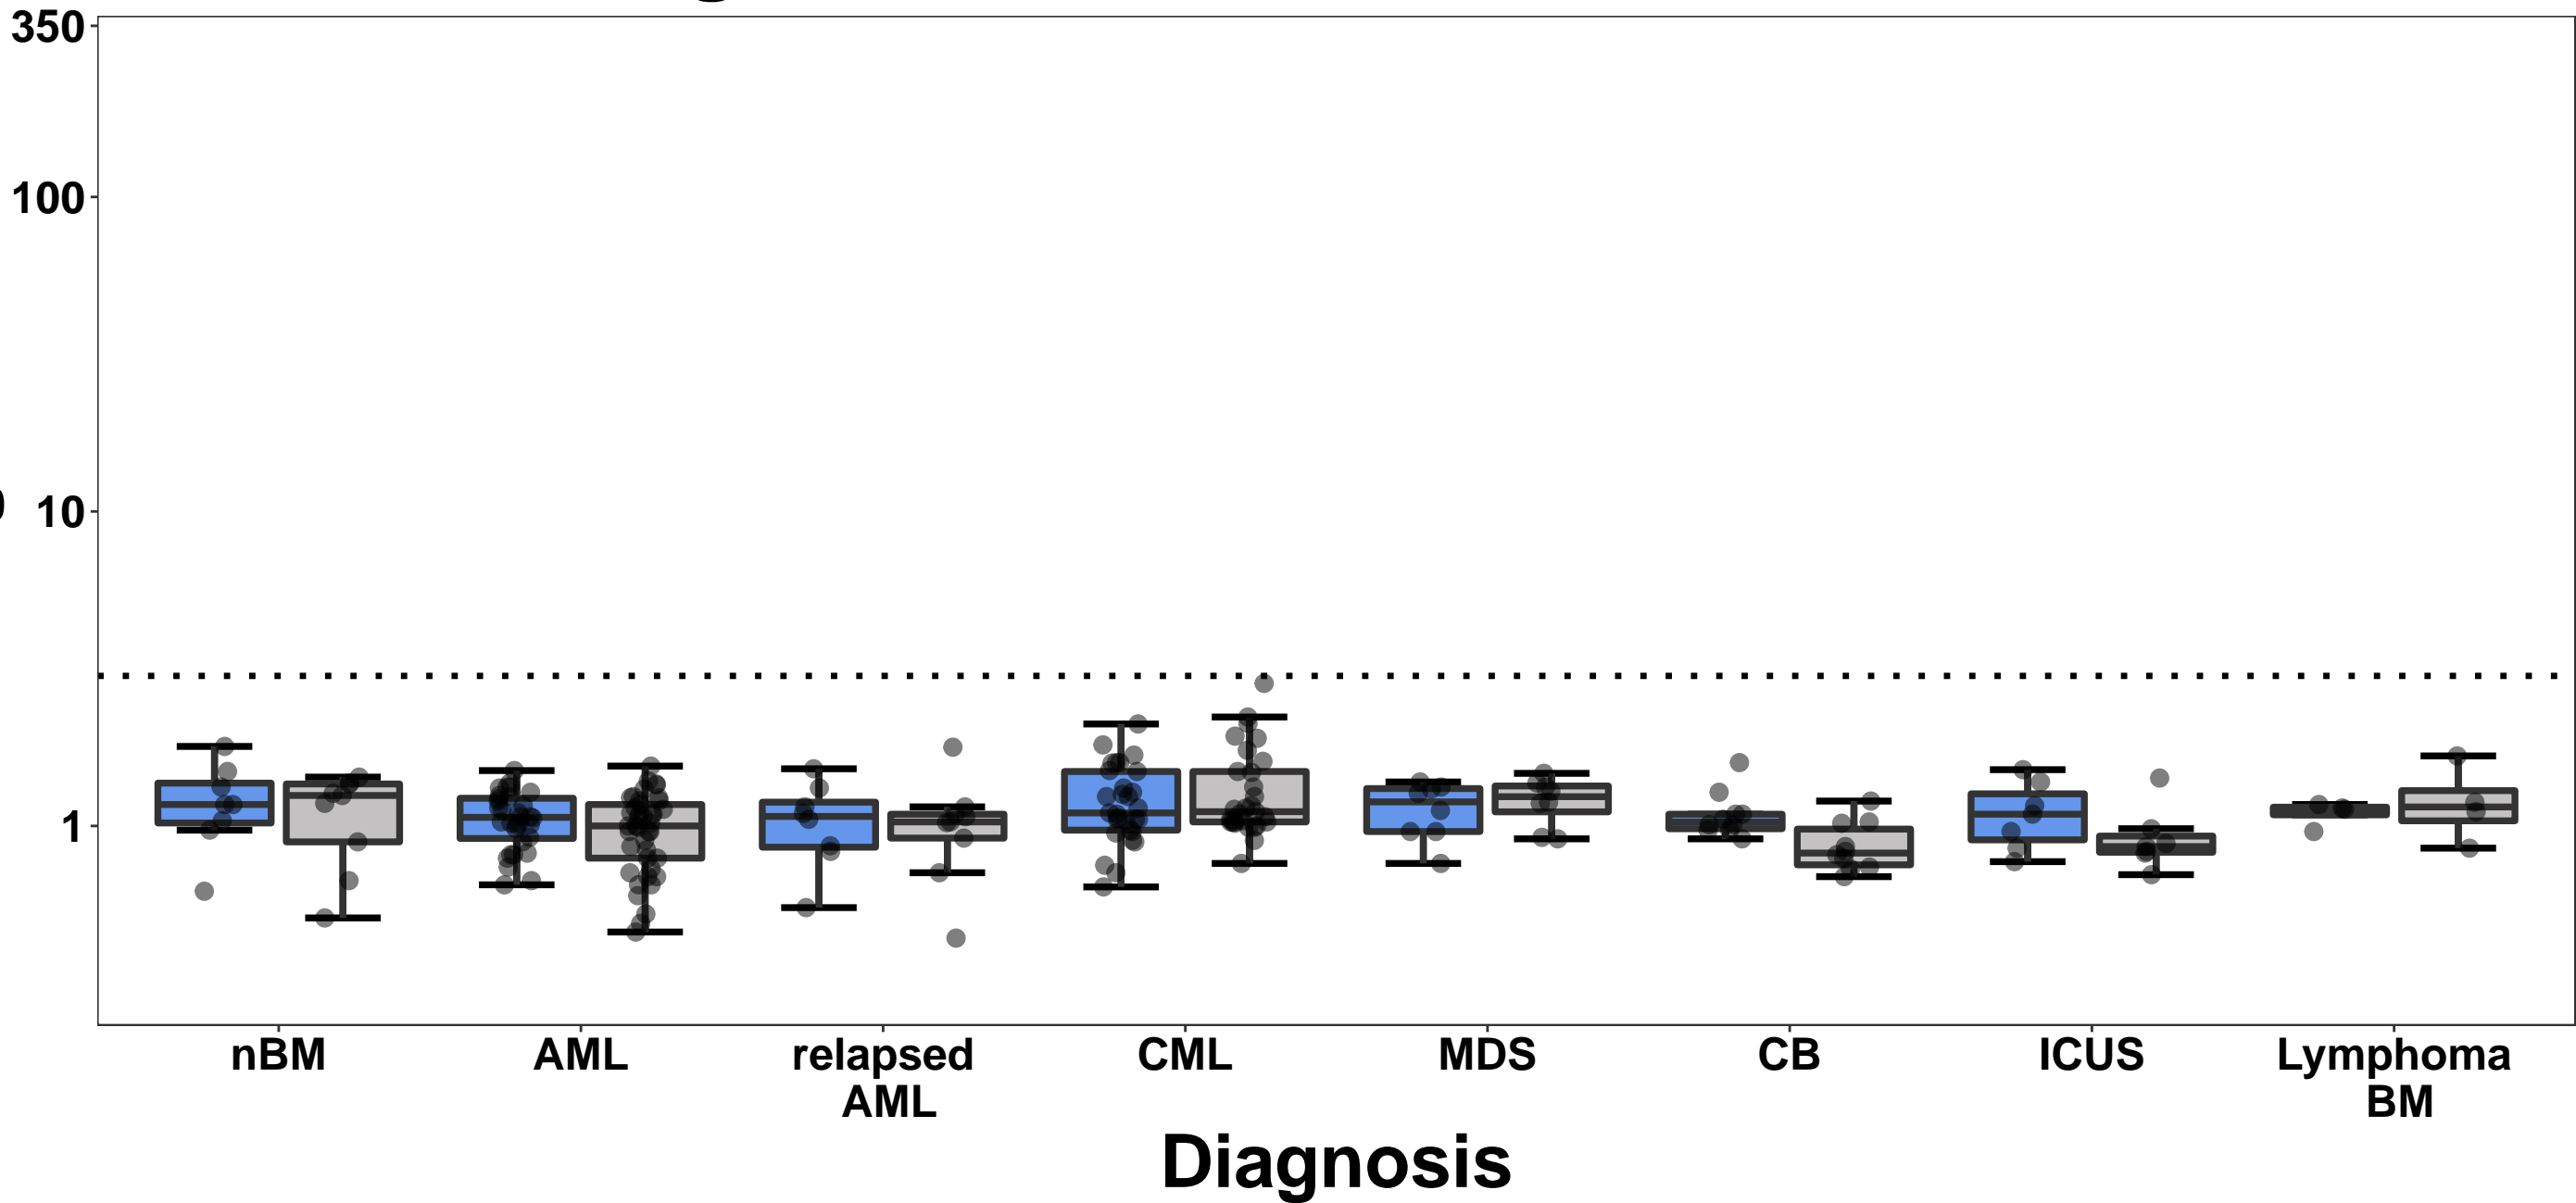



Cell fraction  CD34+/CD38-  CD34+/CD38+

# CD309 percentage

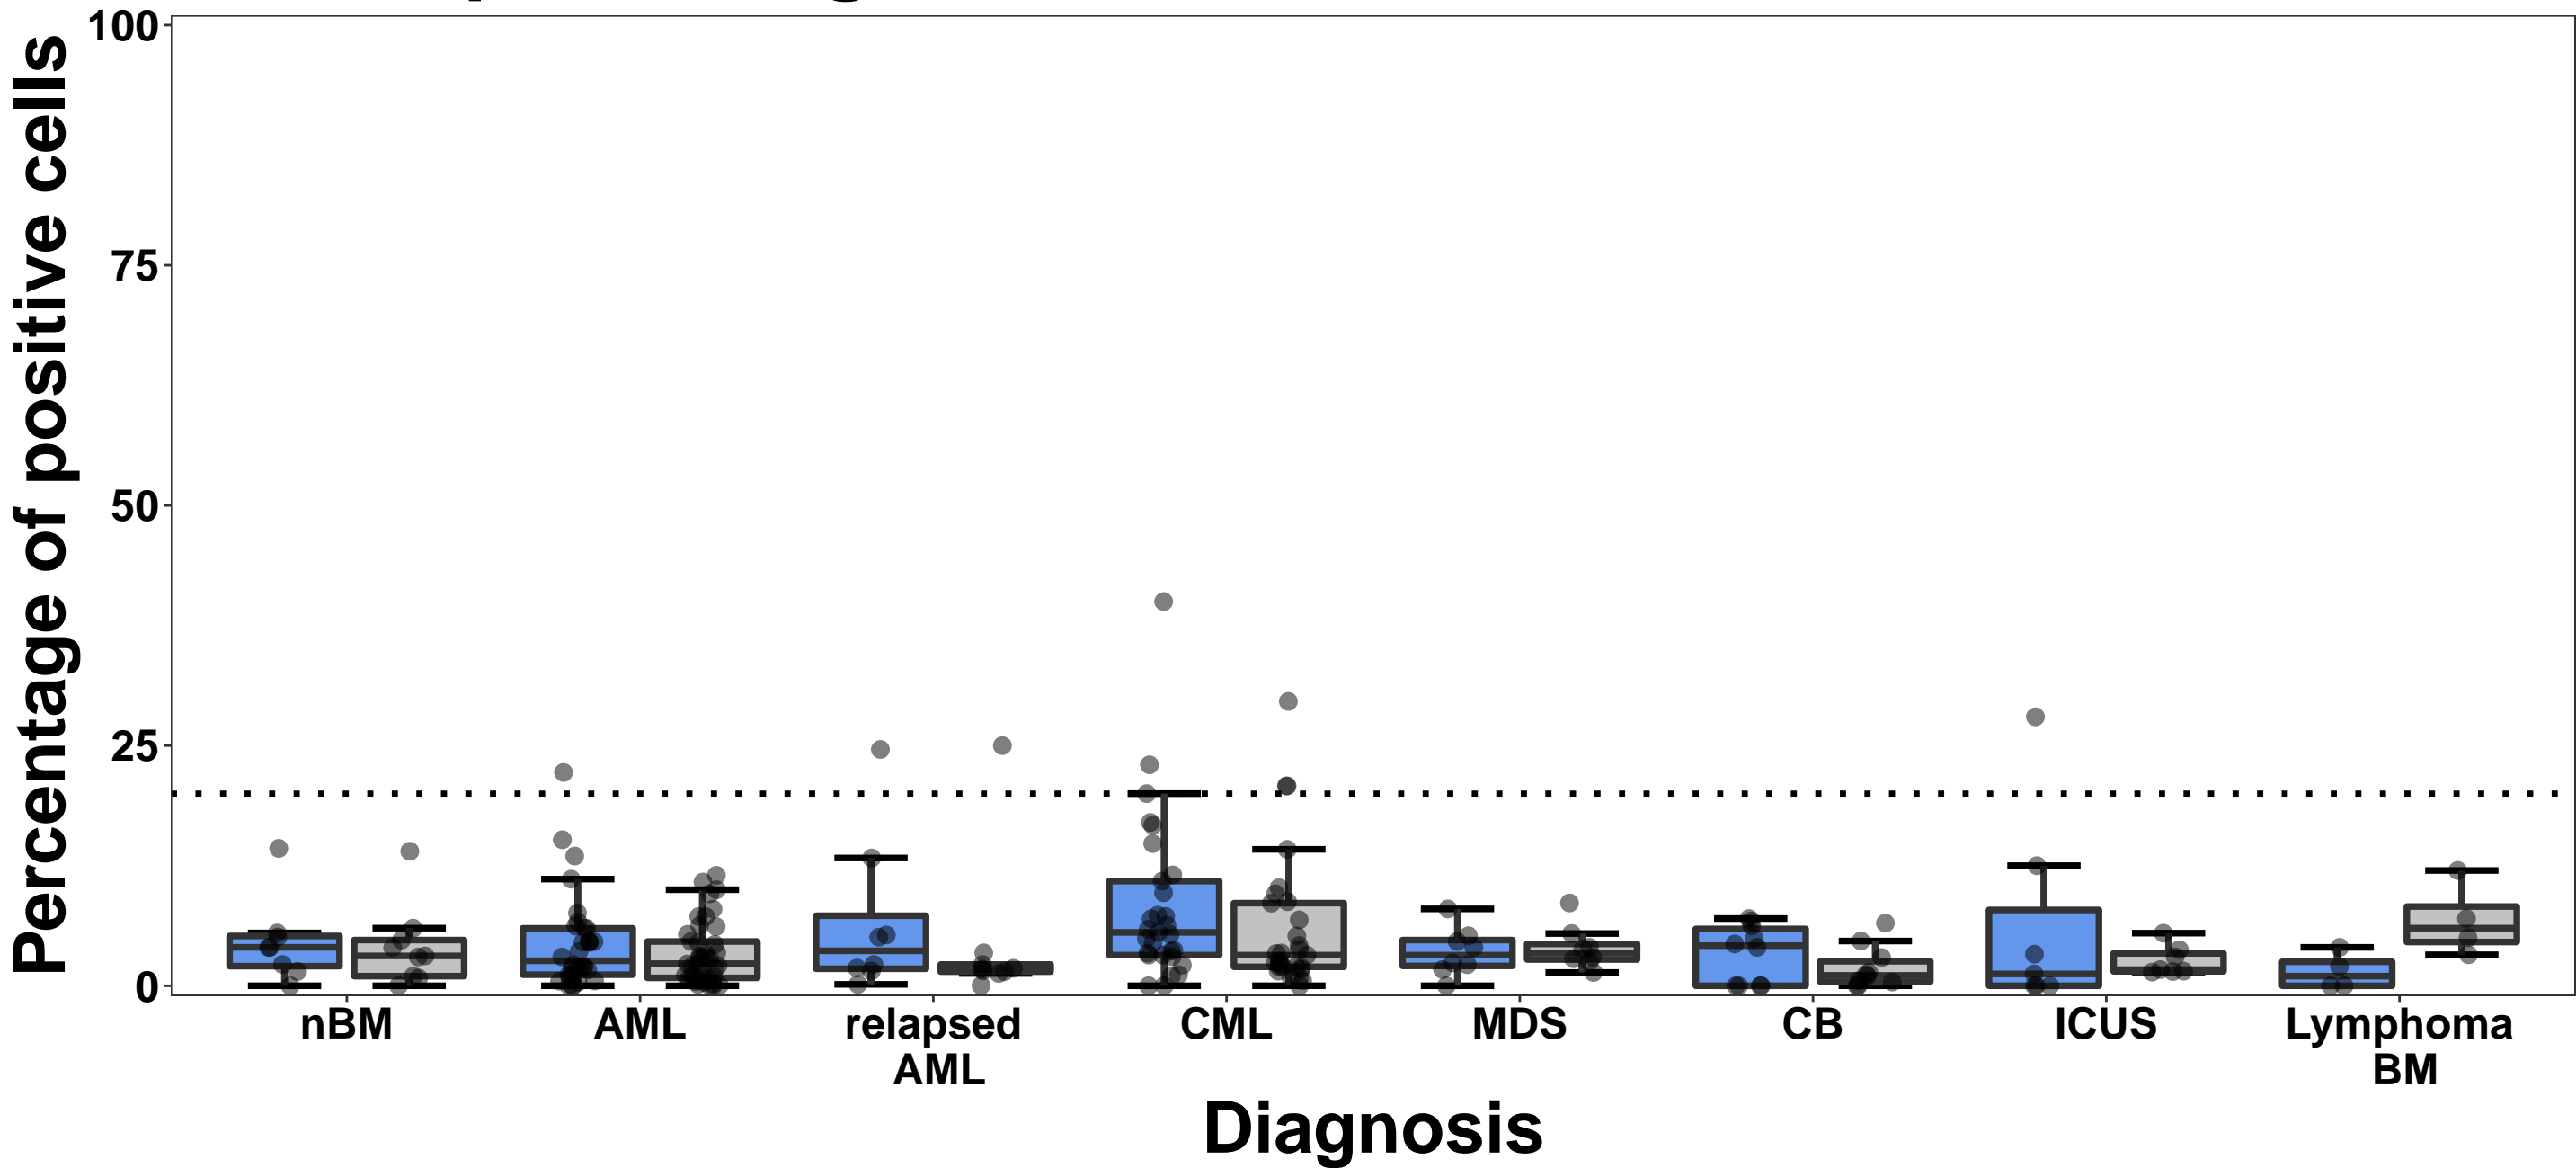

# CD321 staining index

Cell fraction  CD34+/CD38-  CD34+/CD38+

Staining index

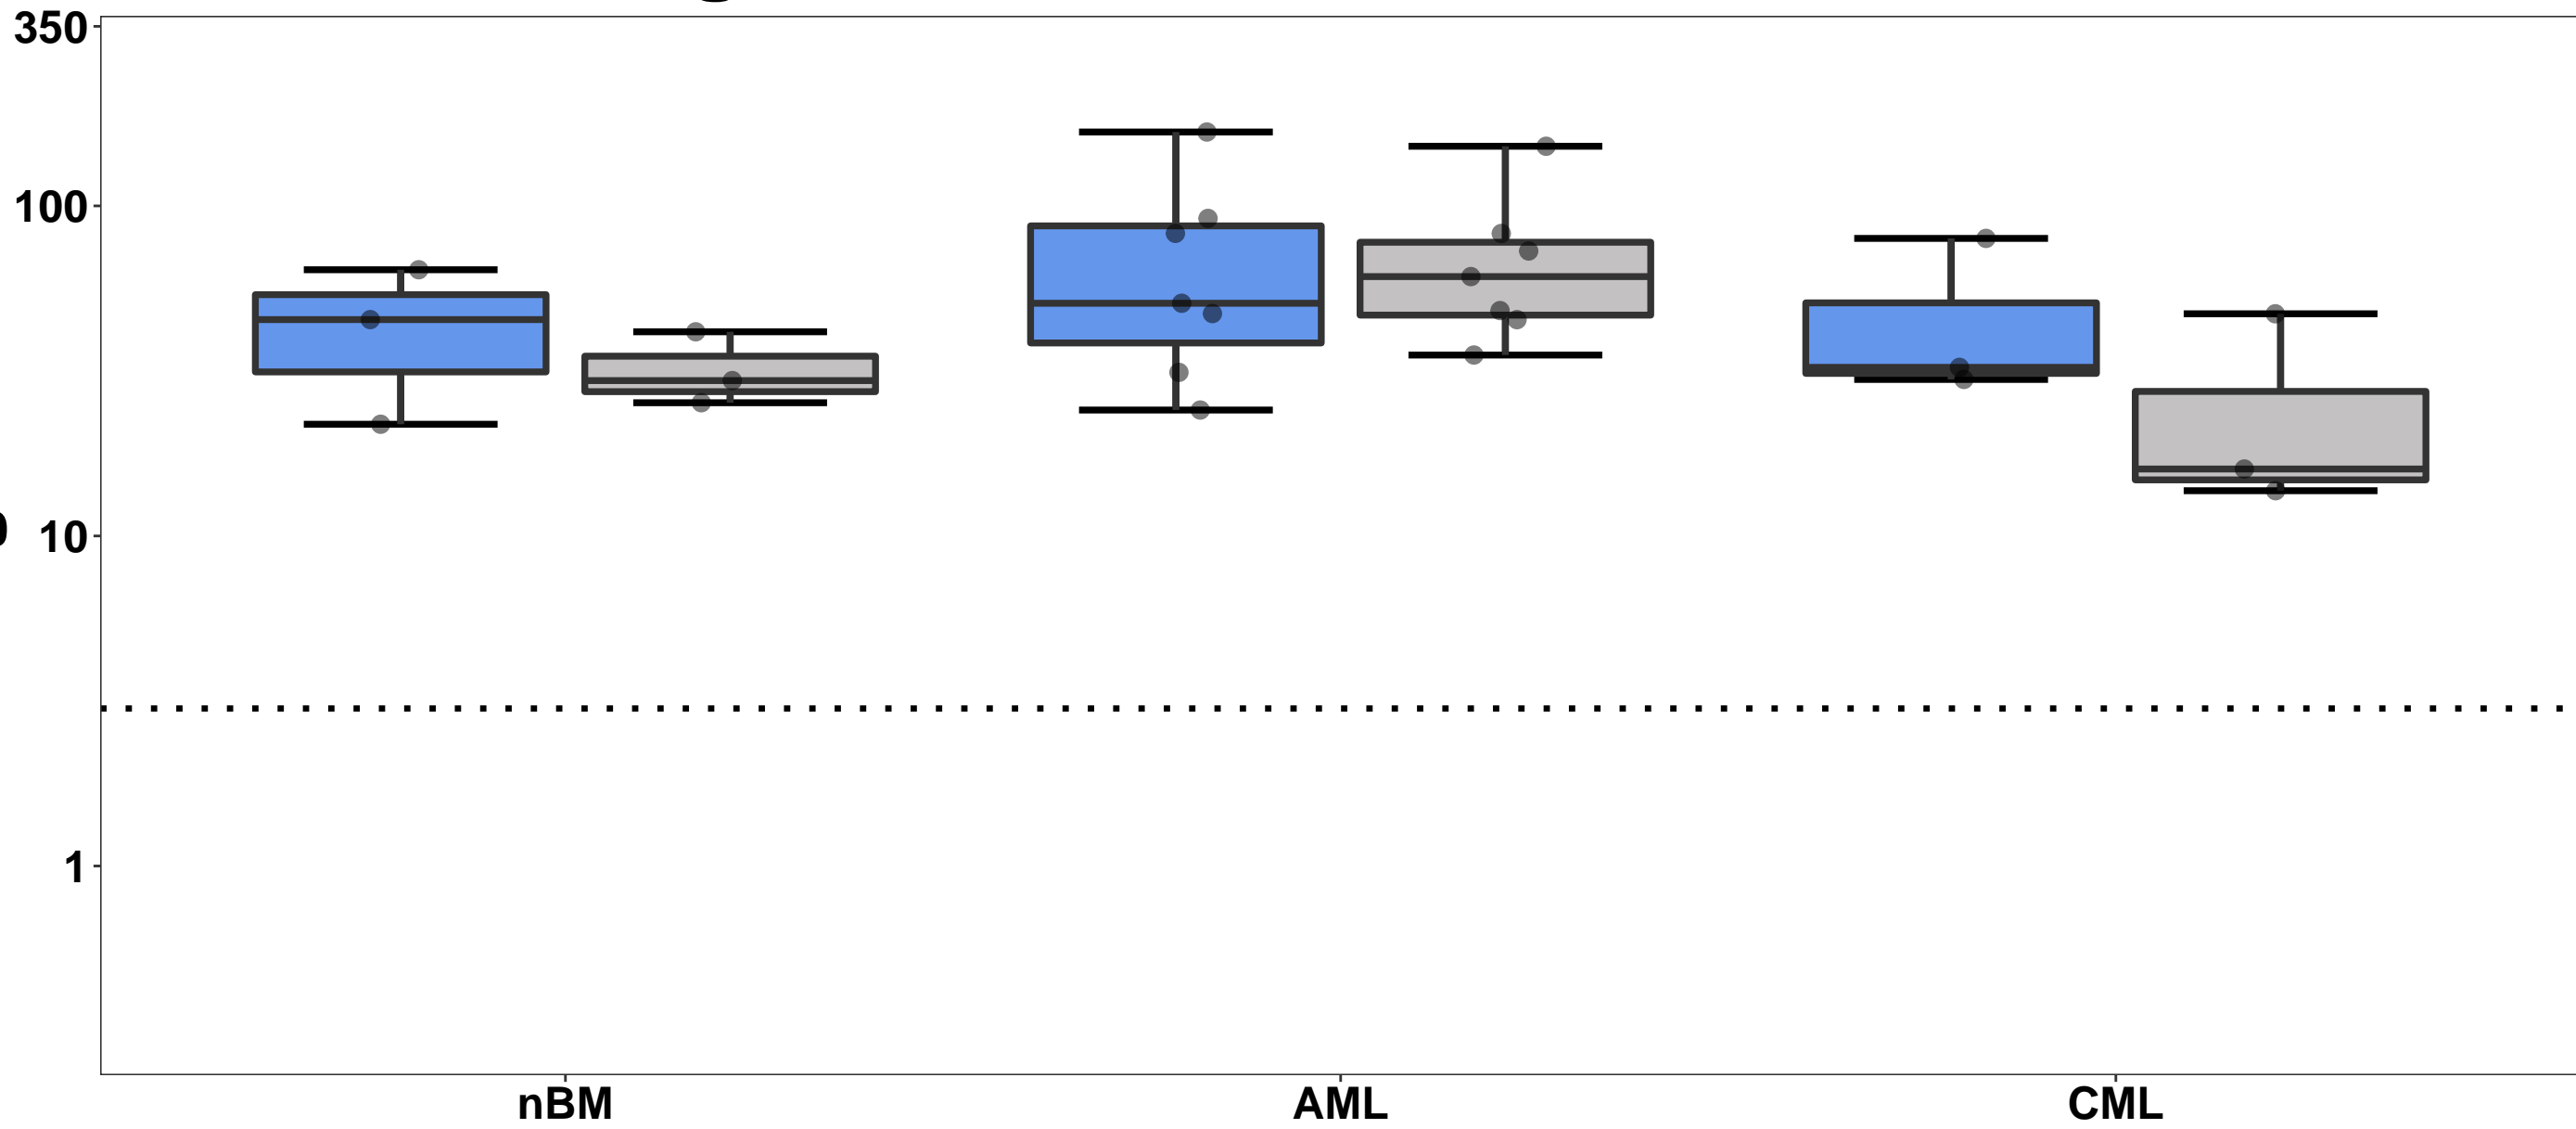

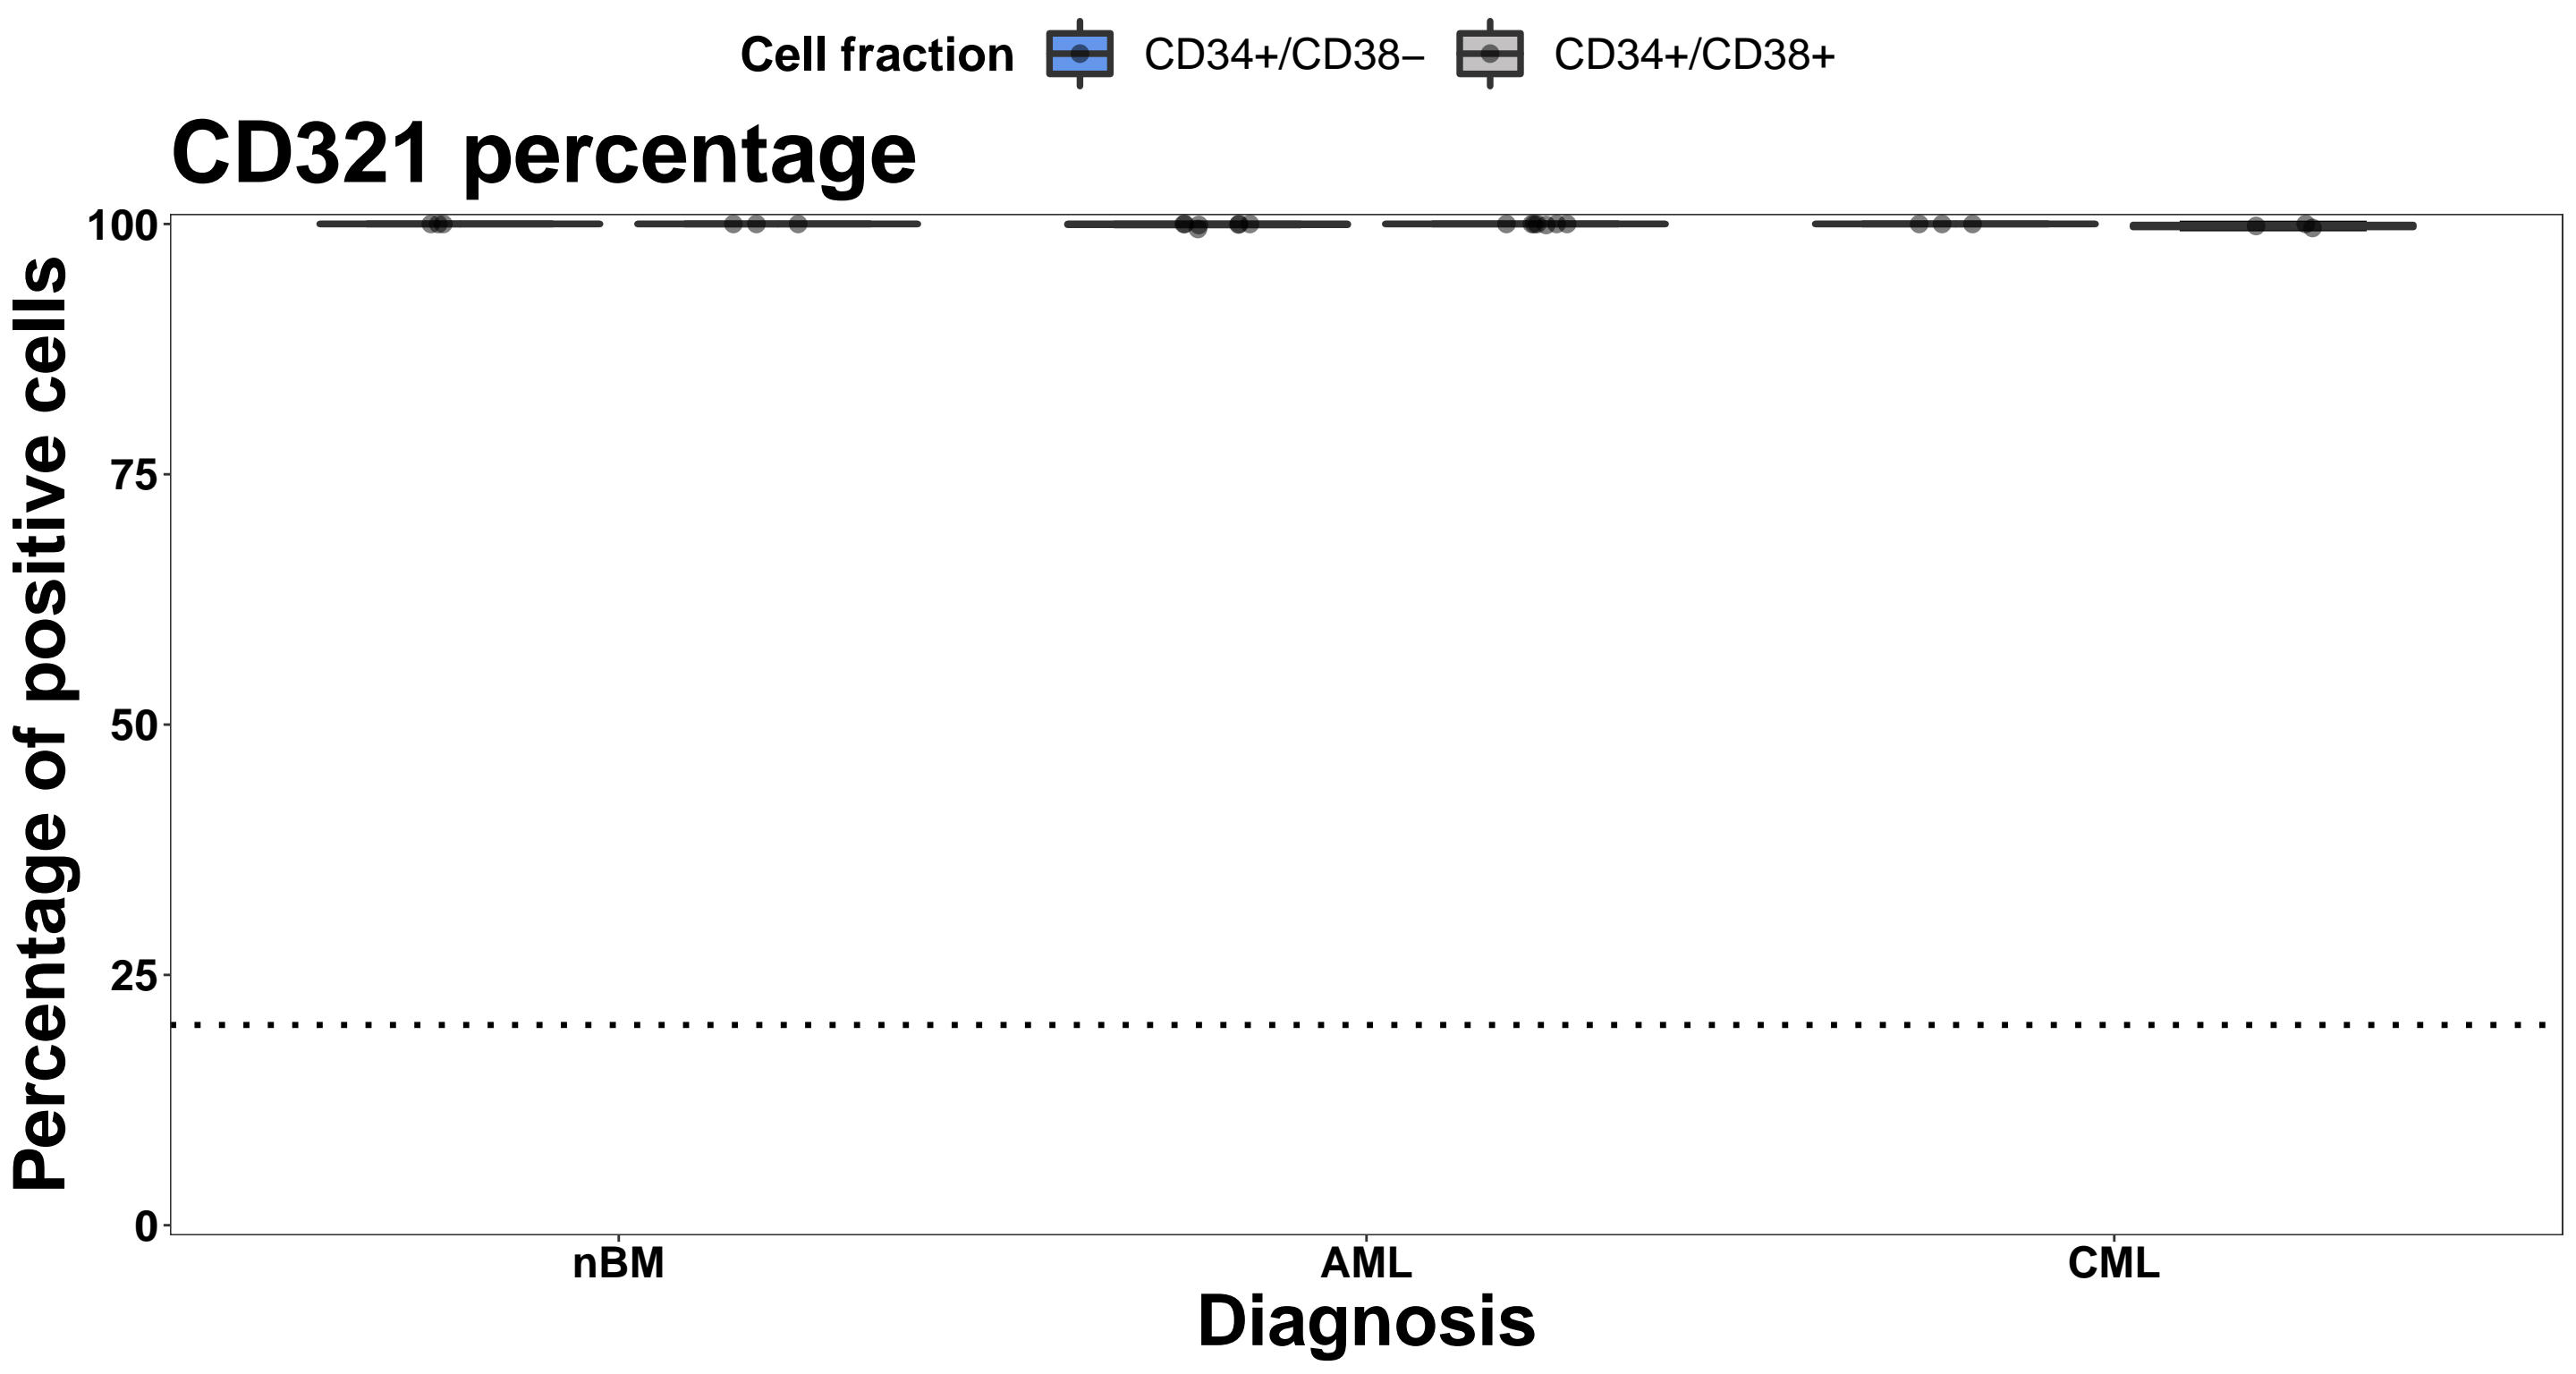

Cell fraction  CD34+/CD38-  CD34+/CD38+

# CD325 staining index

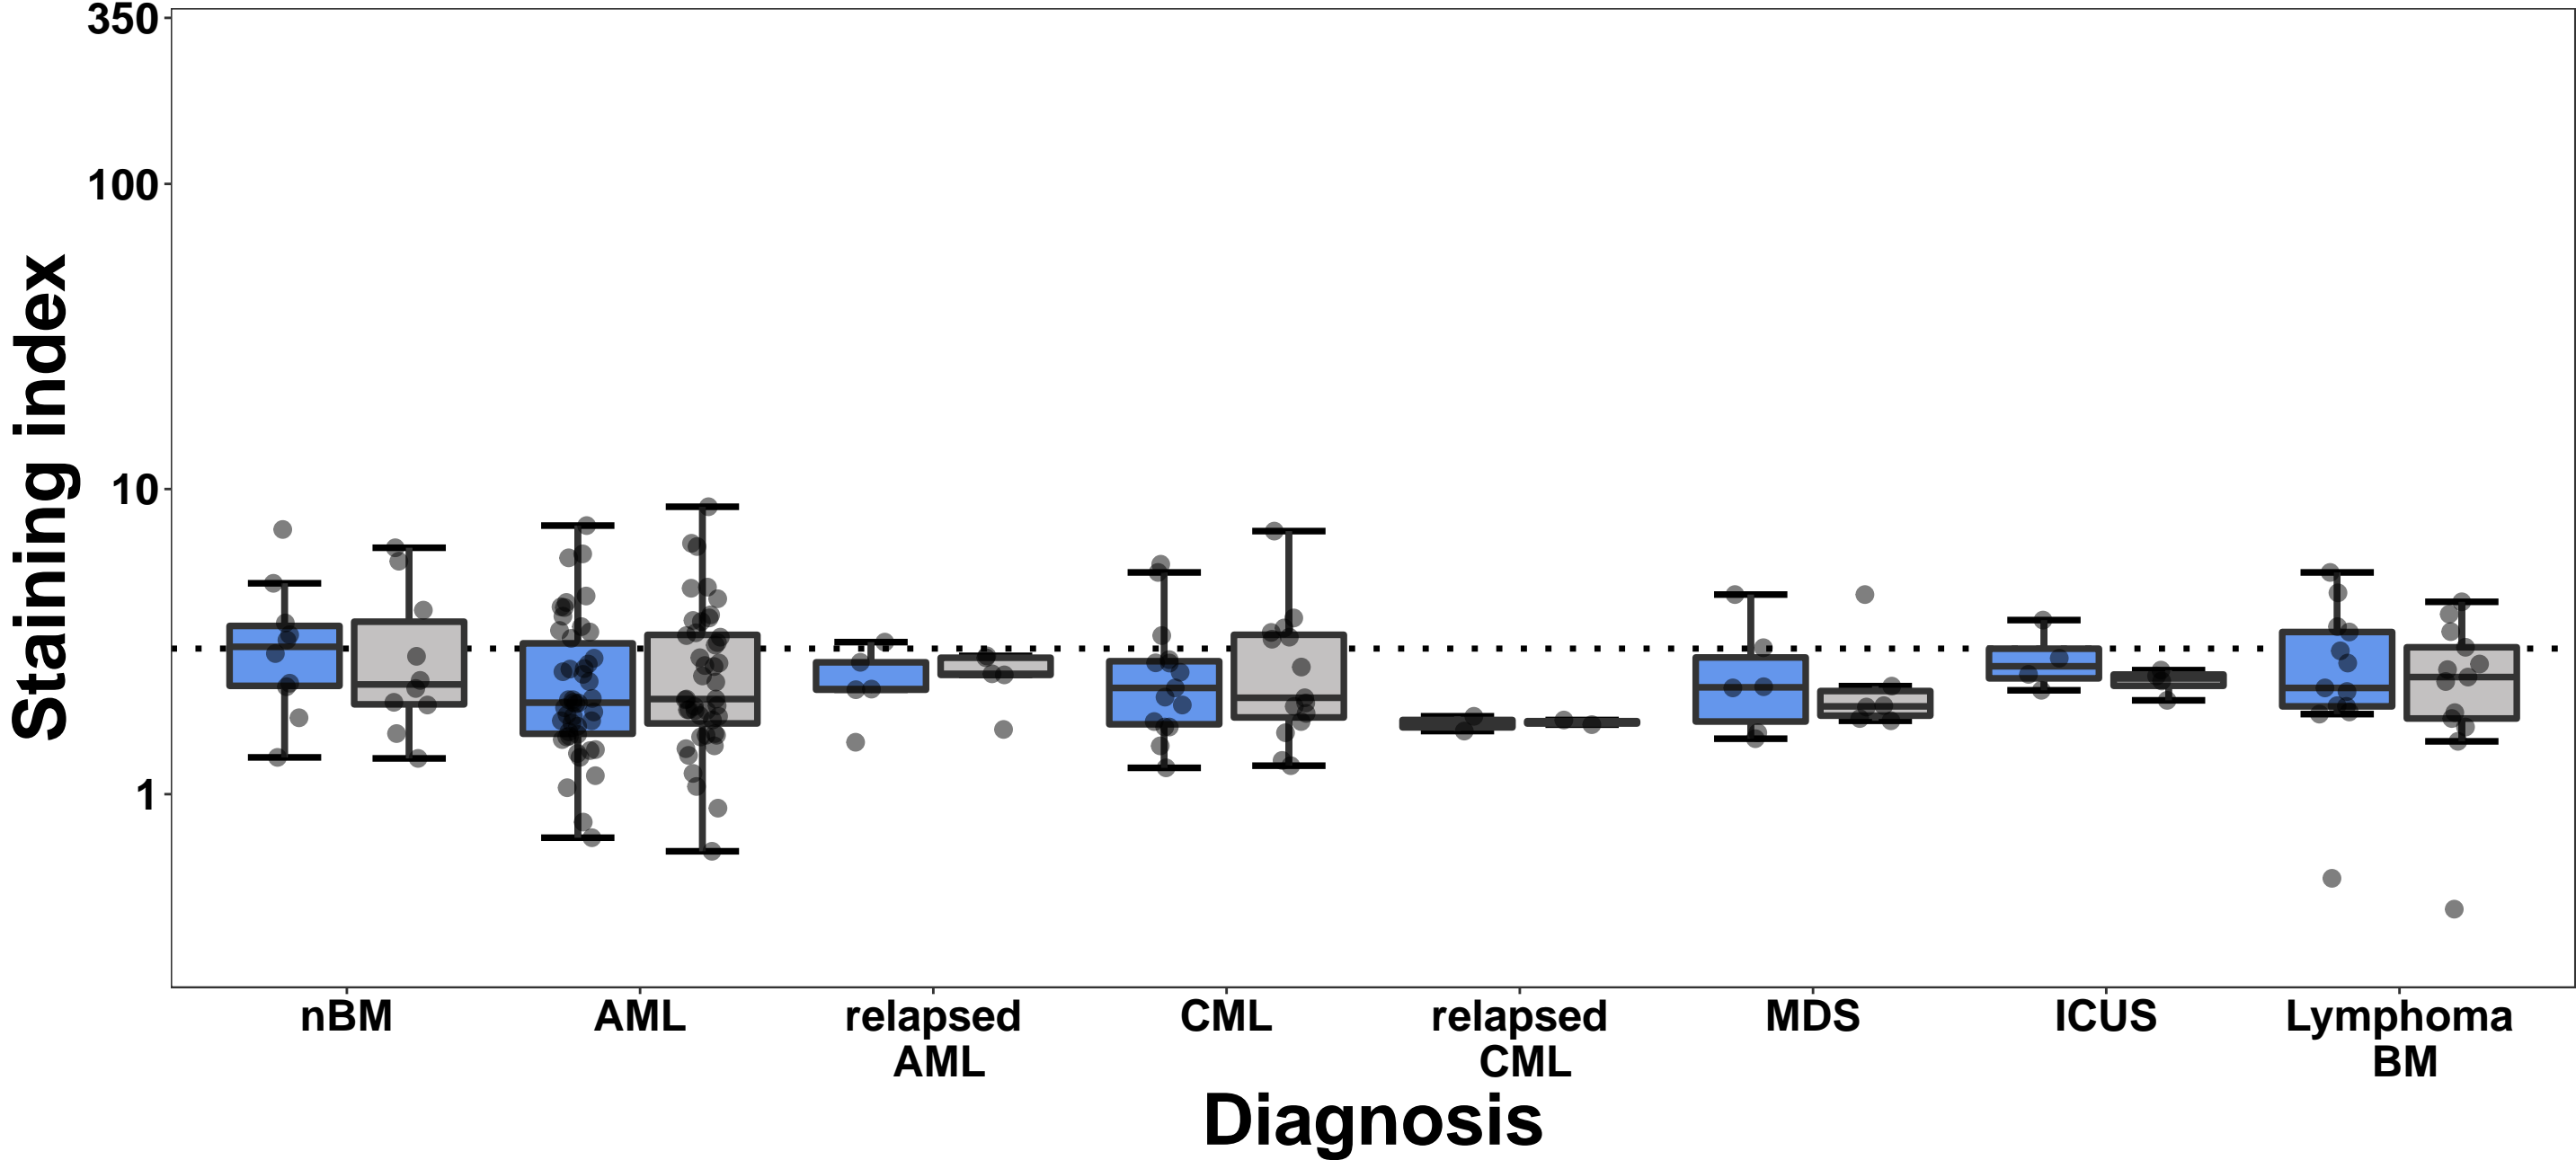

Cell fraction  CD34+/CD38-  CD34+/CD38+

# CD325 percentage

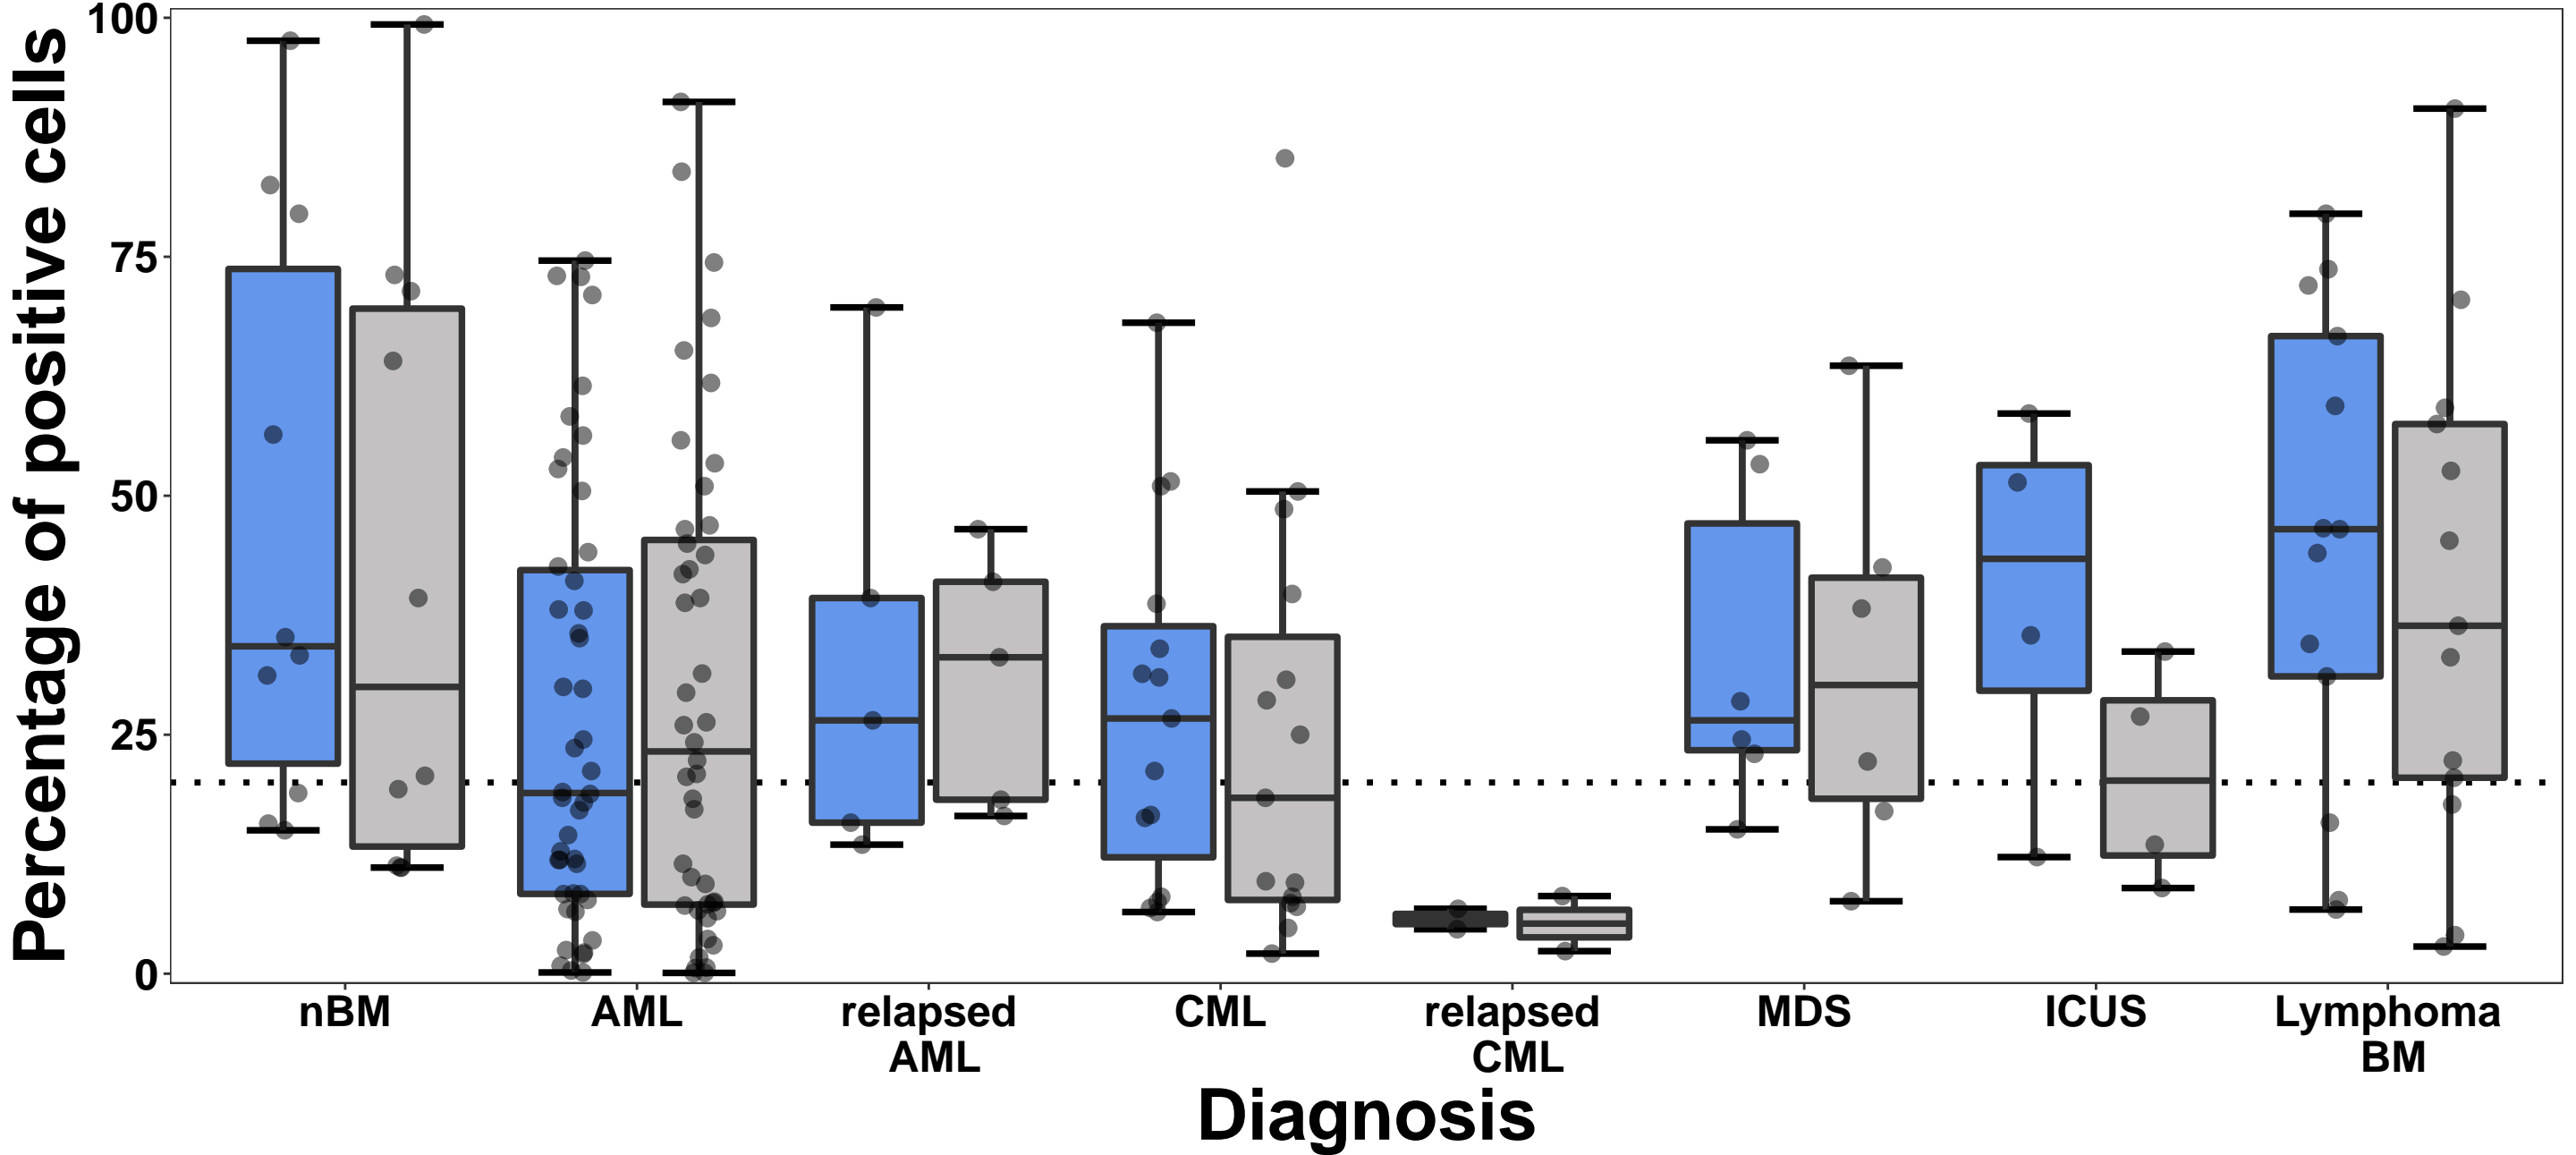

Cell fraction  CD34+/CD38-  CD34+/CD38+

# CD332 staining index

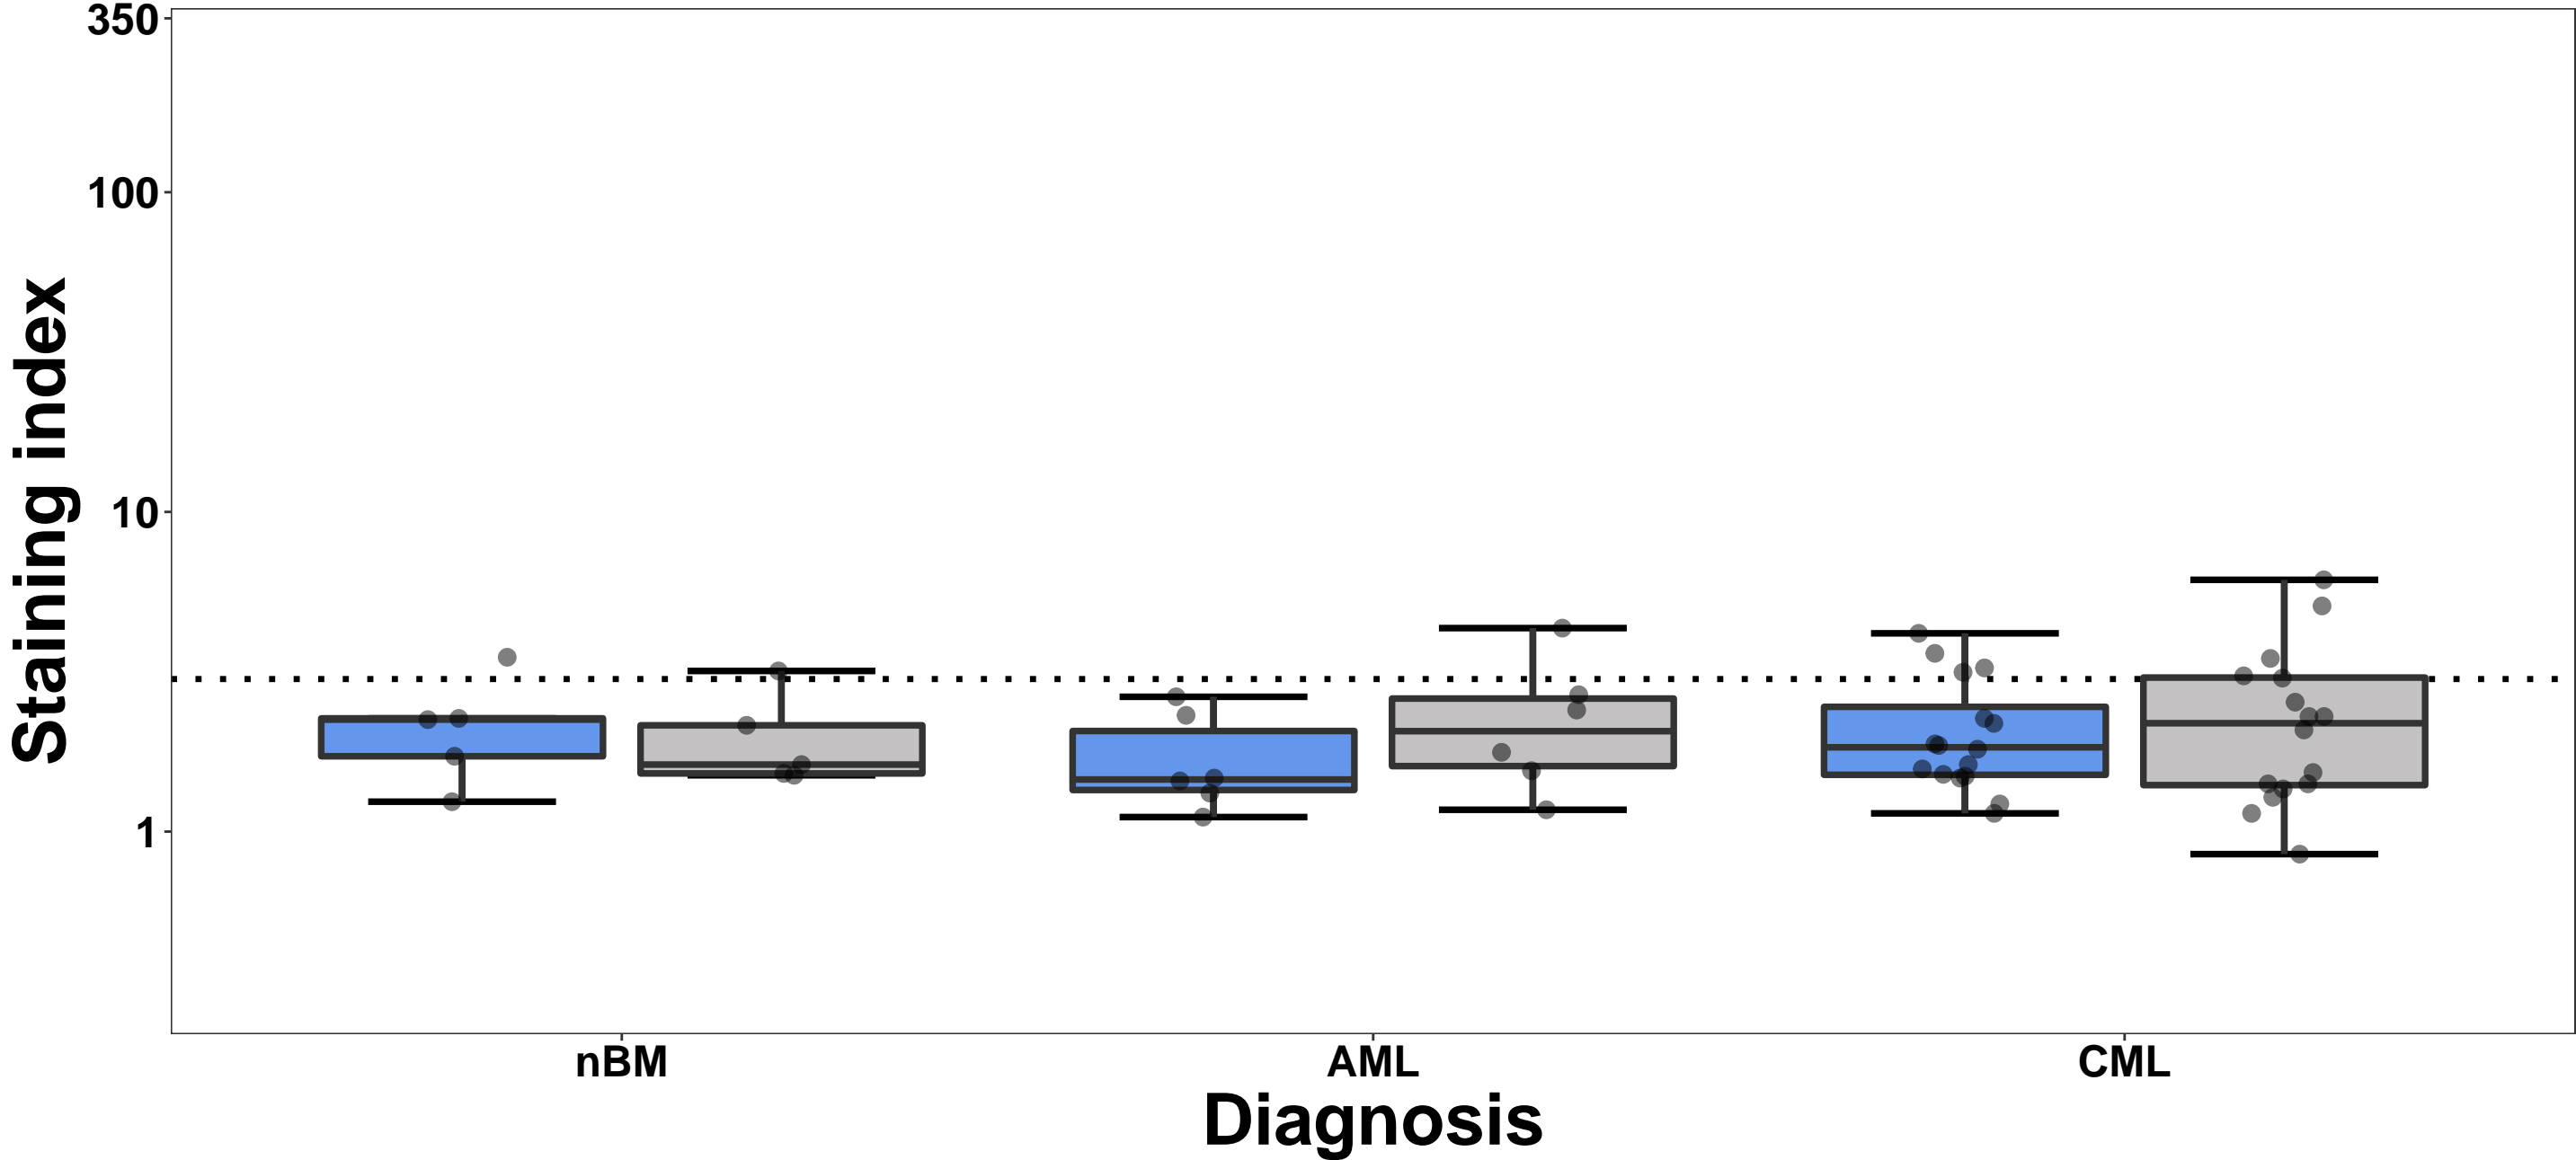

Cell fraction  CD34+/CD38-  CD34+/CD38+

# CD332 percentage

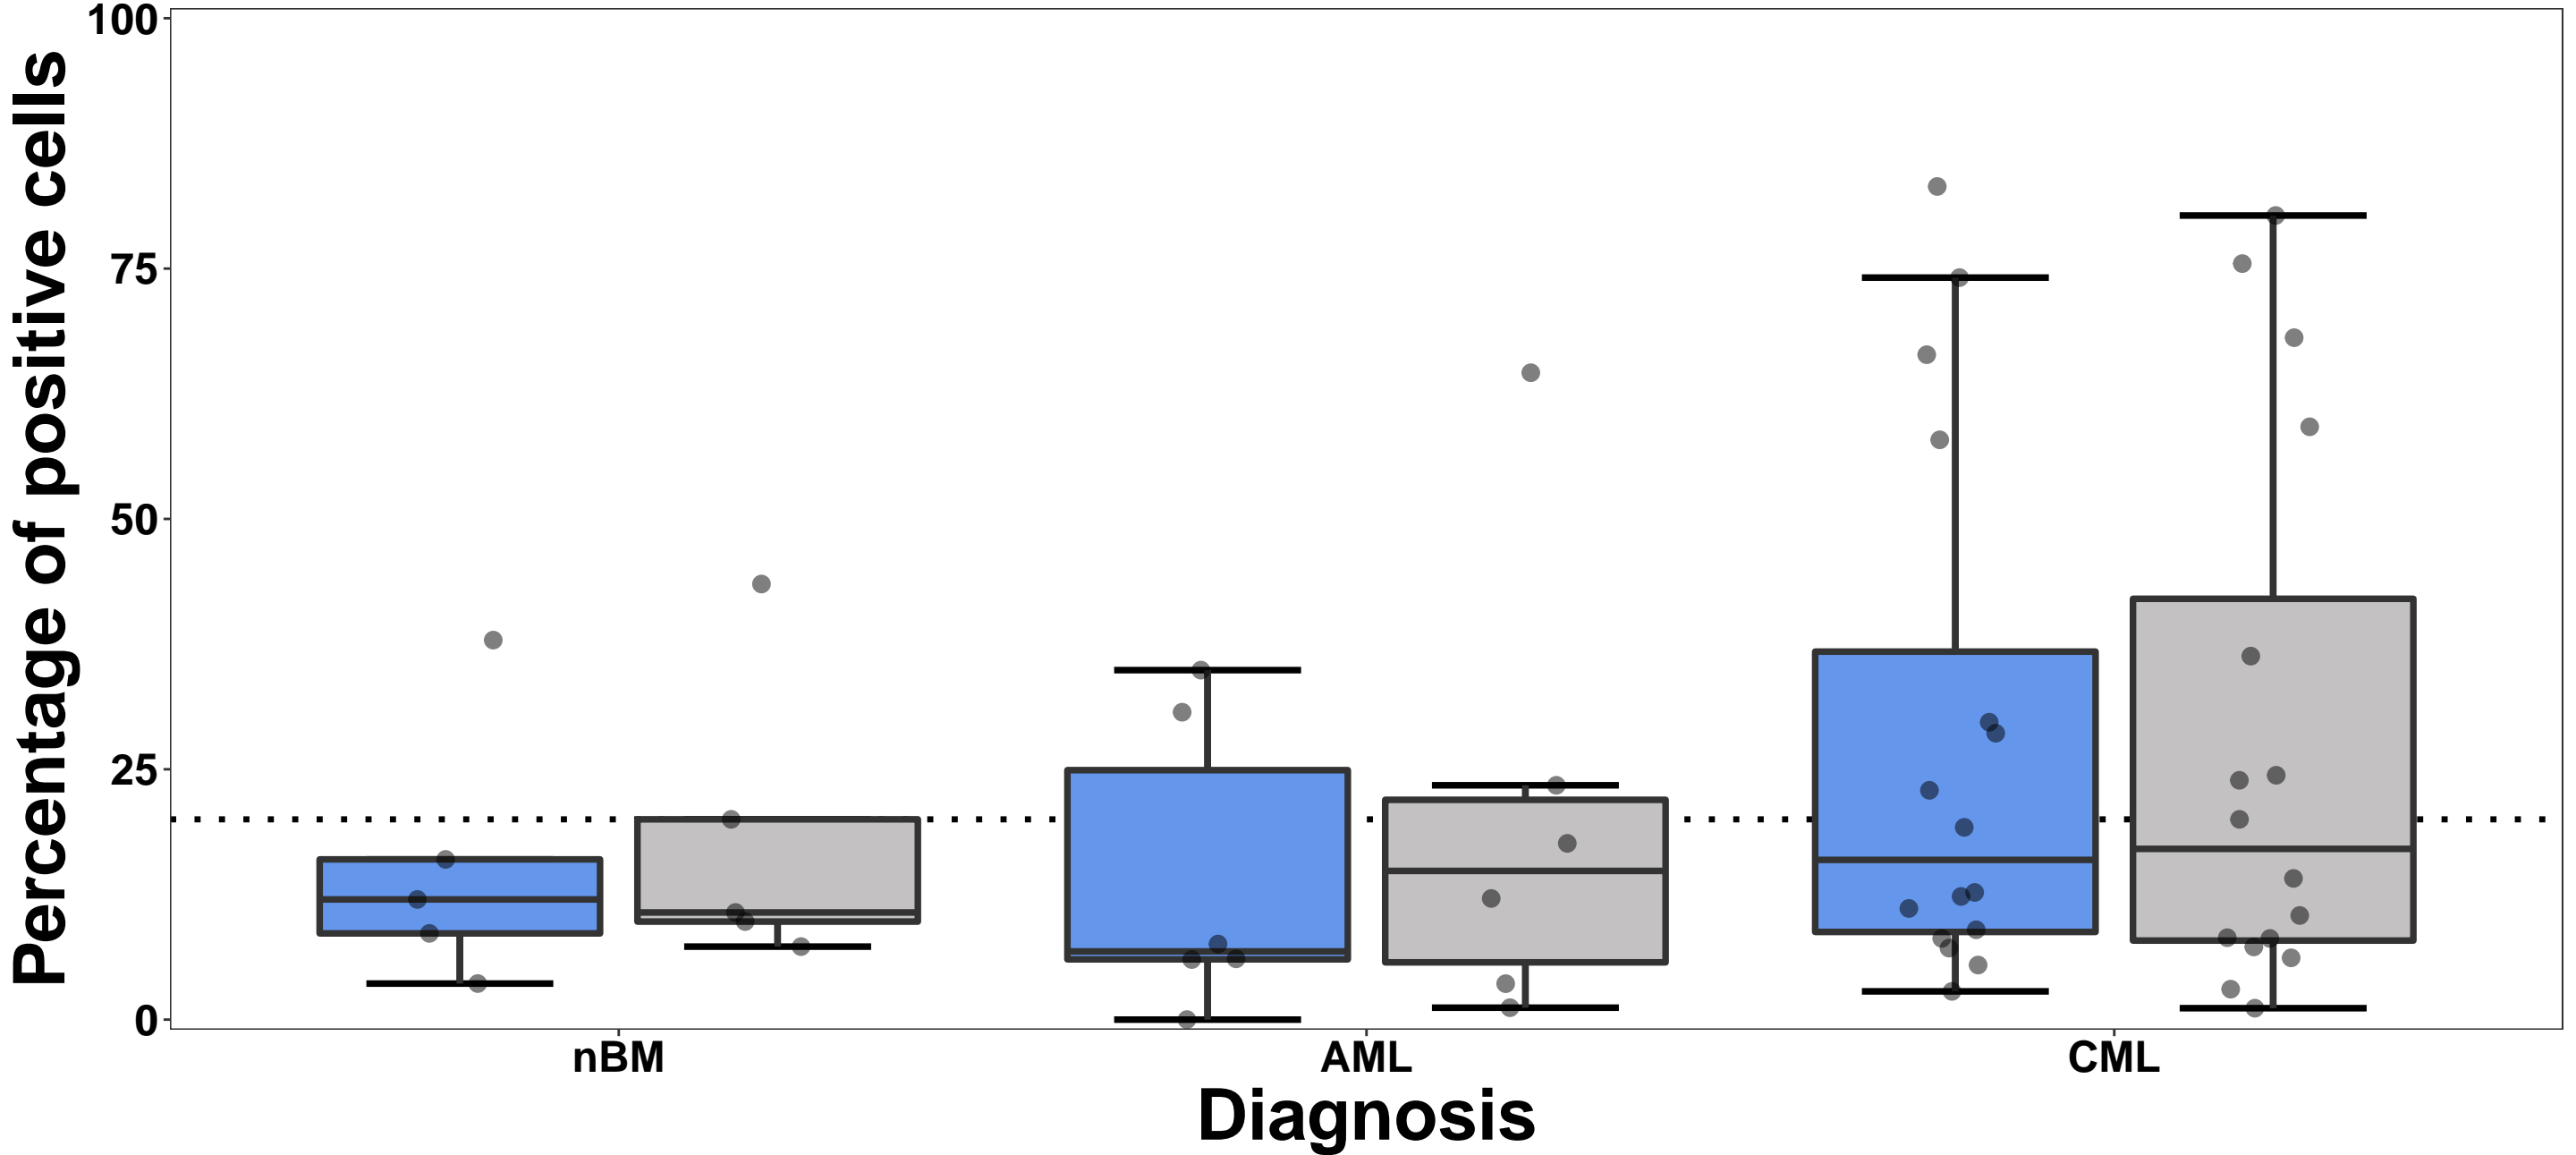

Cell fraction  CD34+/CD38-  CD34+/CD38+

# CD371 staining index

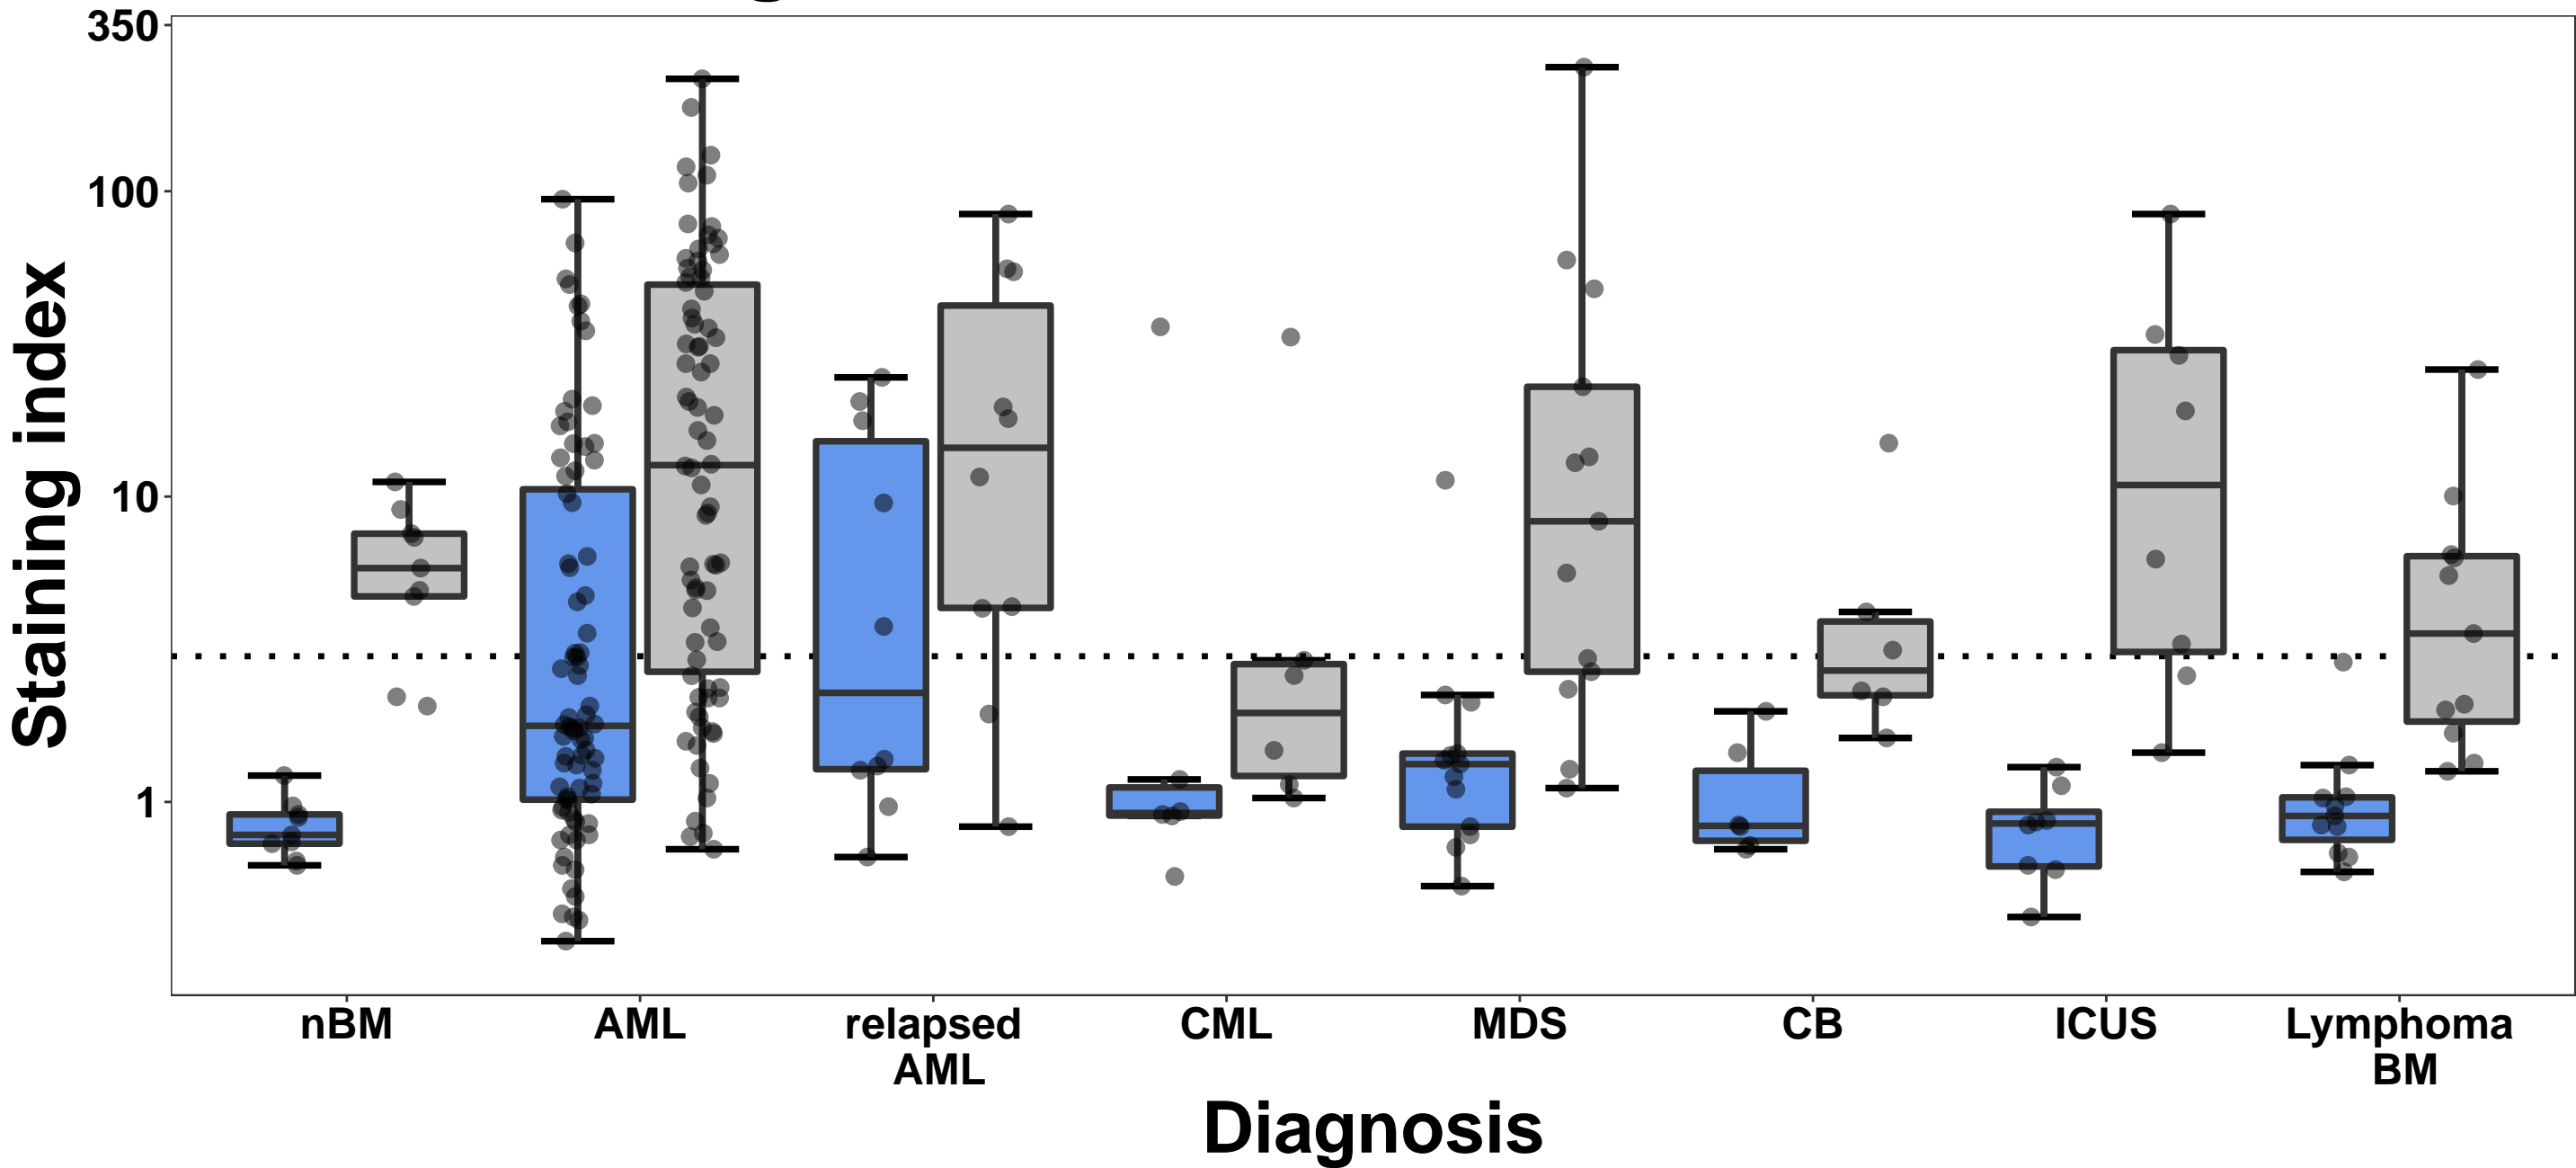



Cell fraction  CD34+/CD38-  CD34+/CD38+

# CD371 percentage

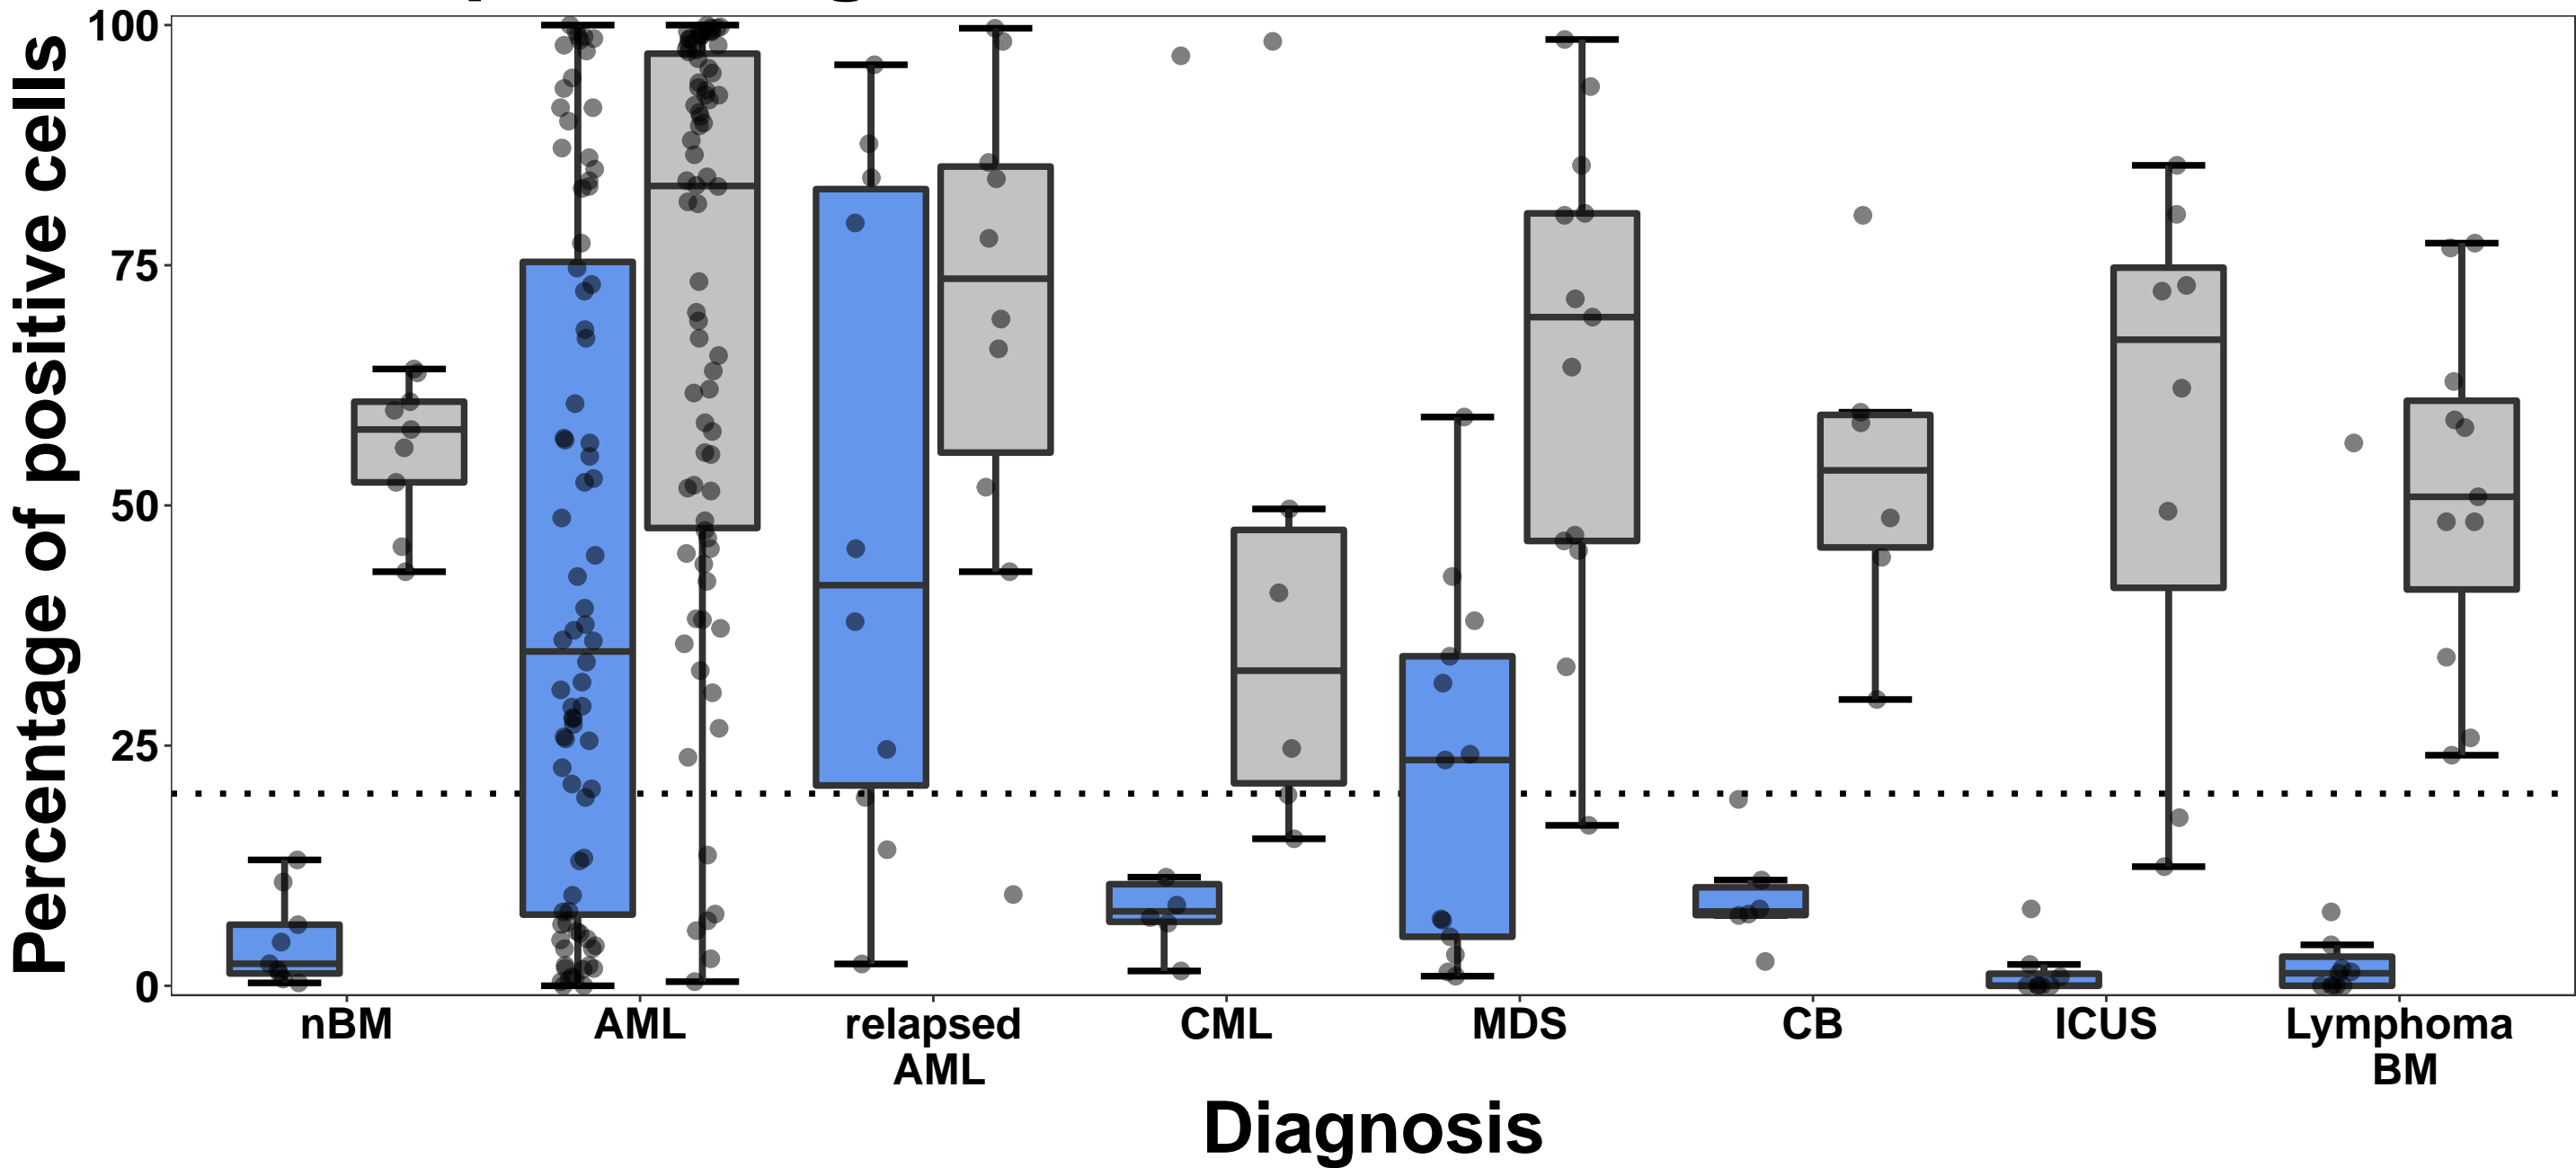

Cell fraction  CD34+/CD38-  CD34+/CD38+

# EPOR staining index

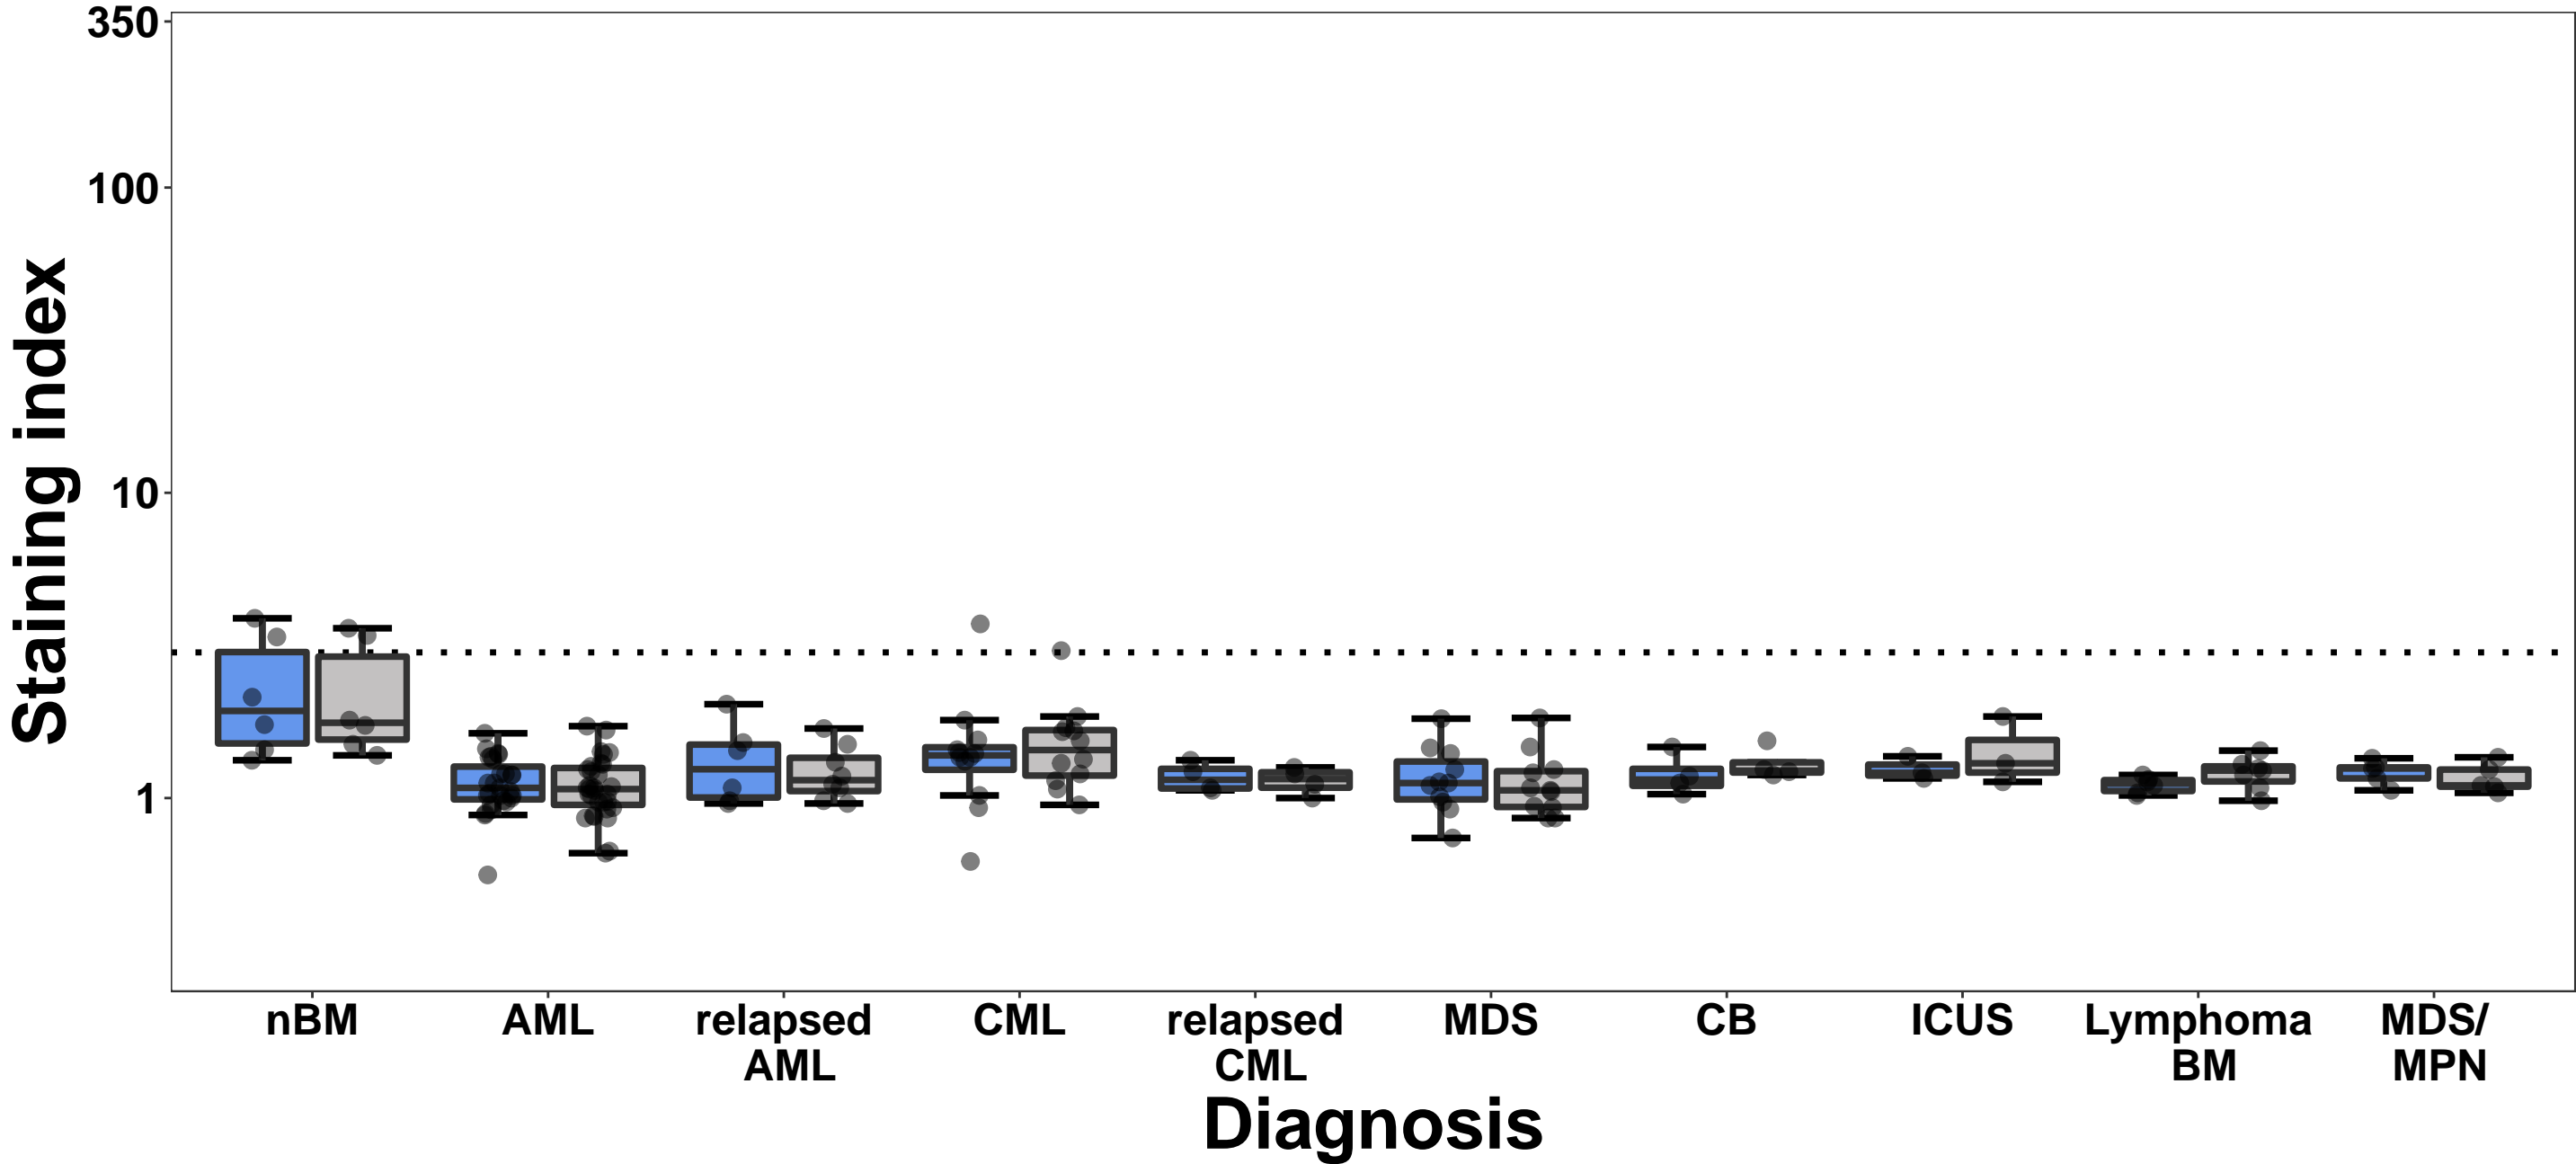

Cell fraction  CD34+/CD38-  CD34+/CD38+

# EPOR percentage

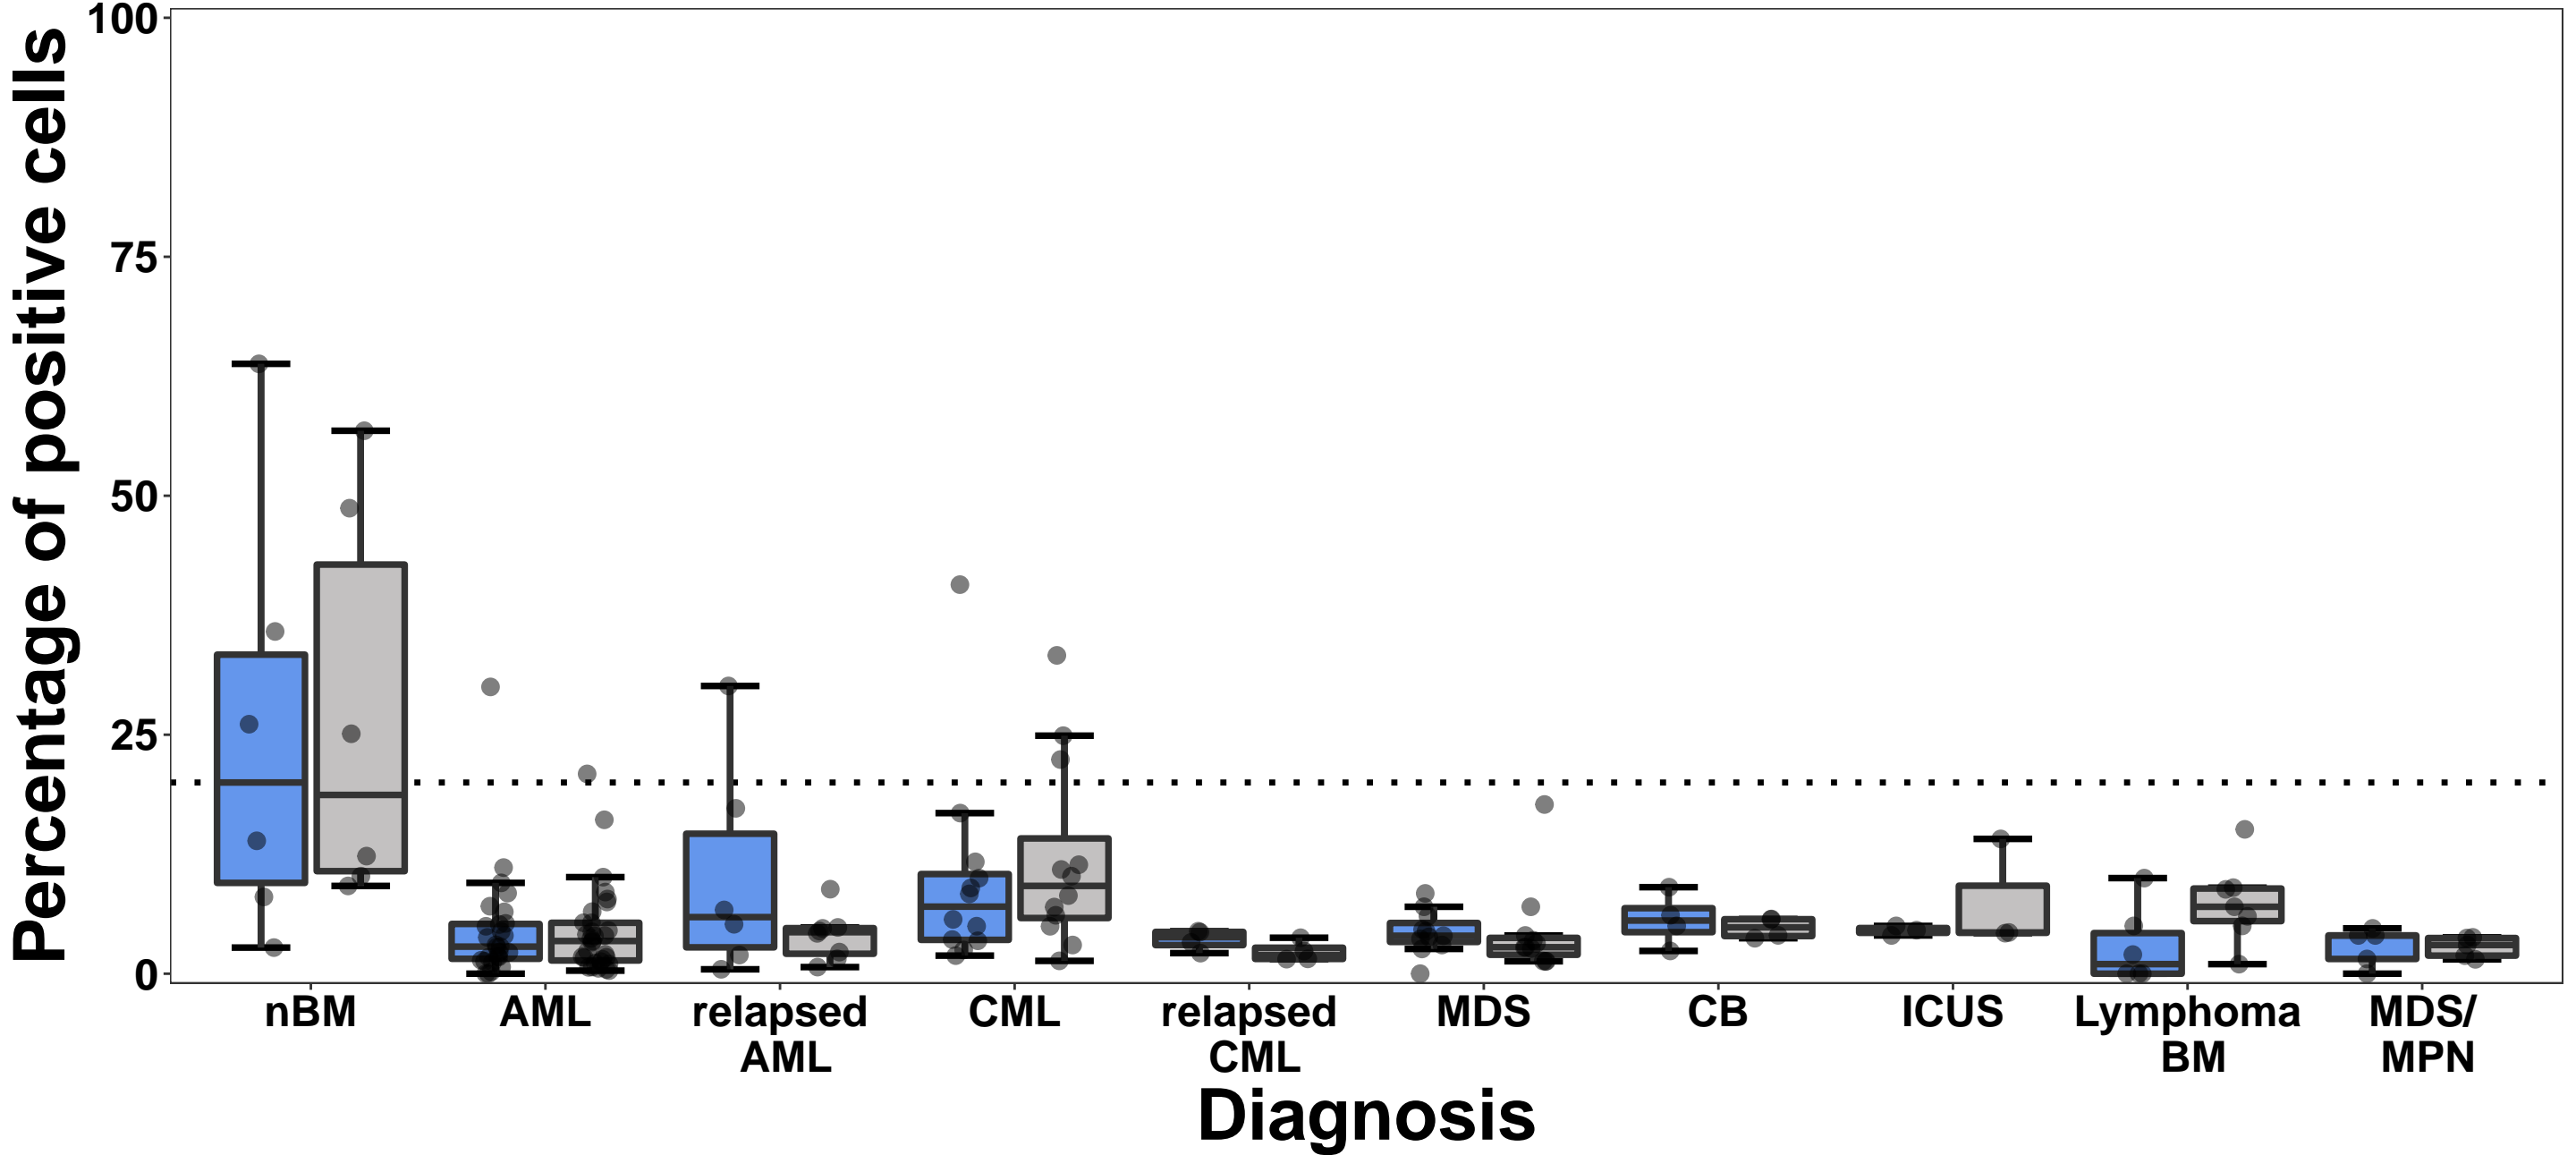

Cell fraction  CD34+/CD38-  CD34+/CD38+

# HLA-DR staining index

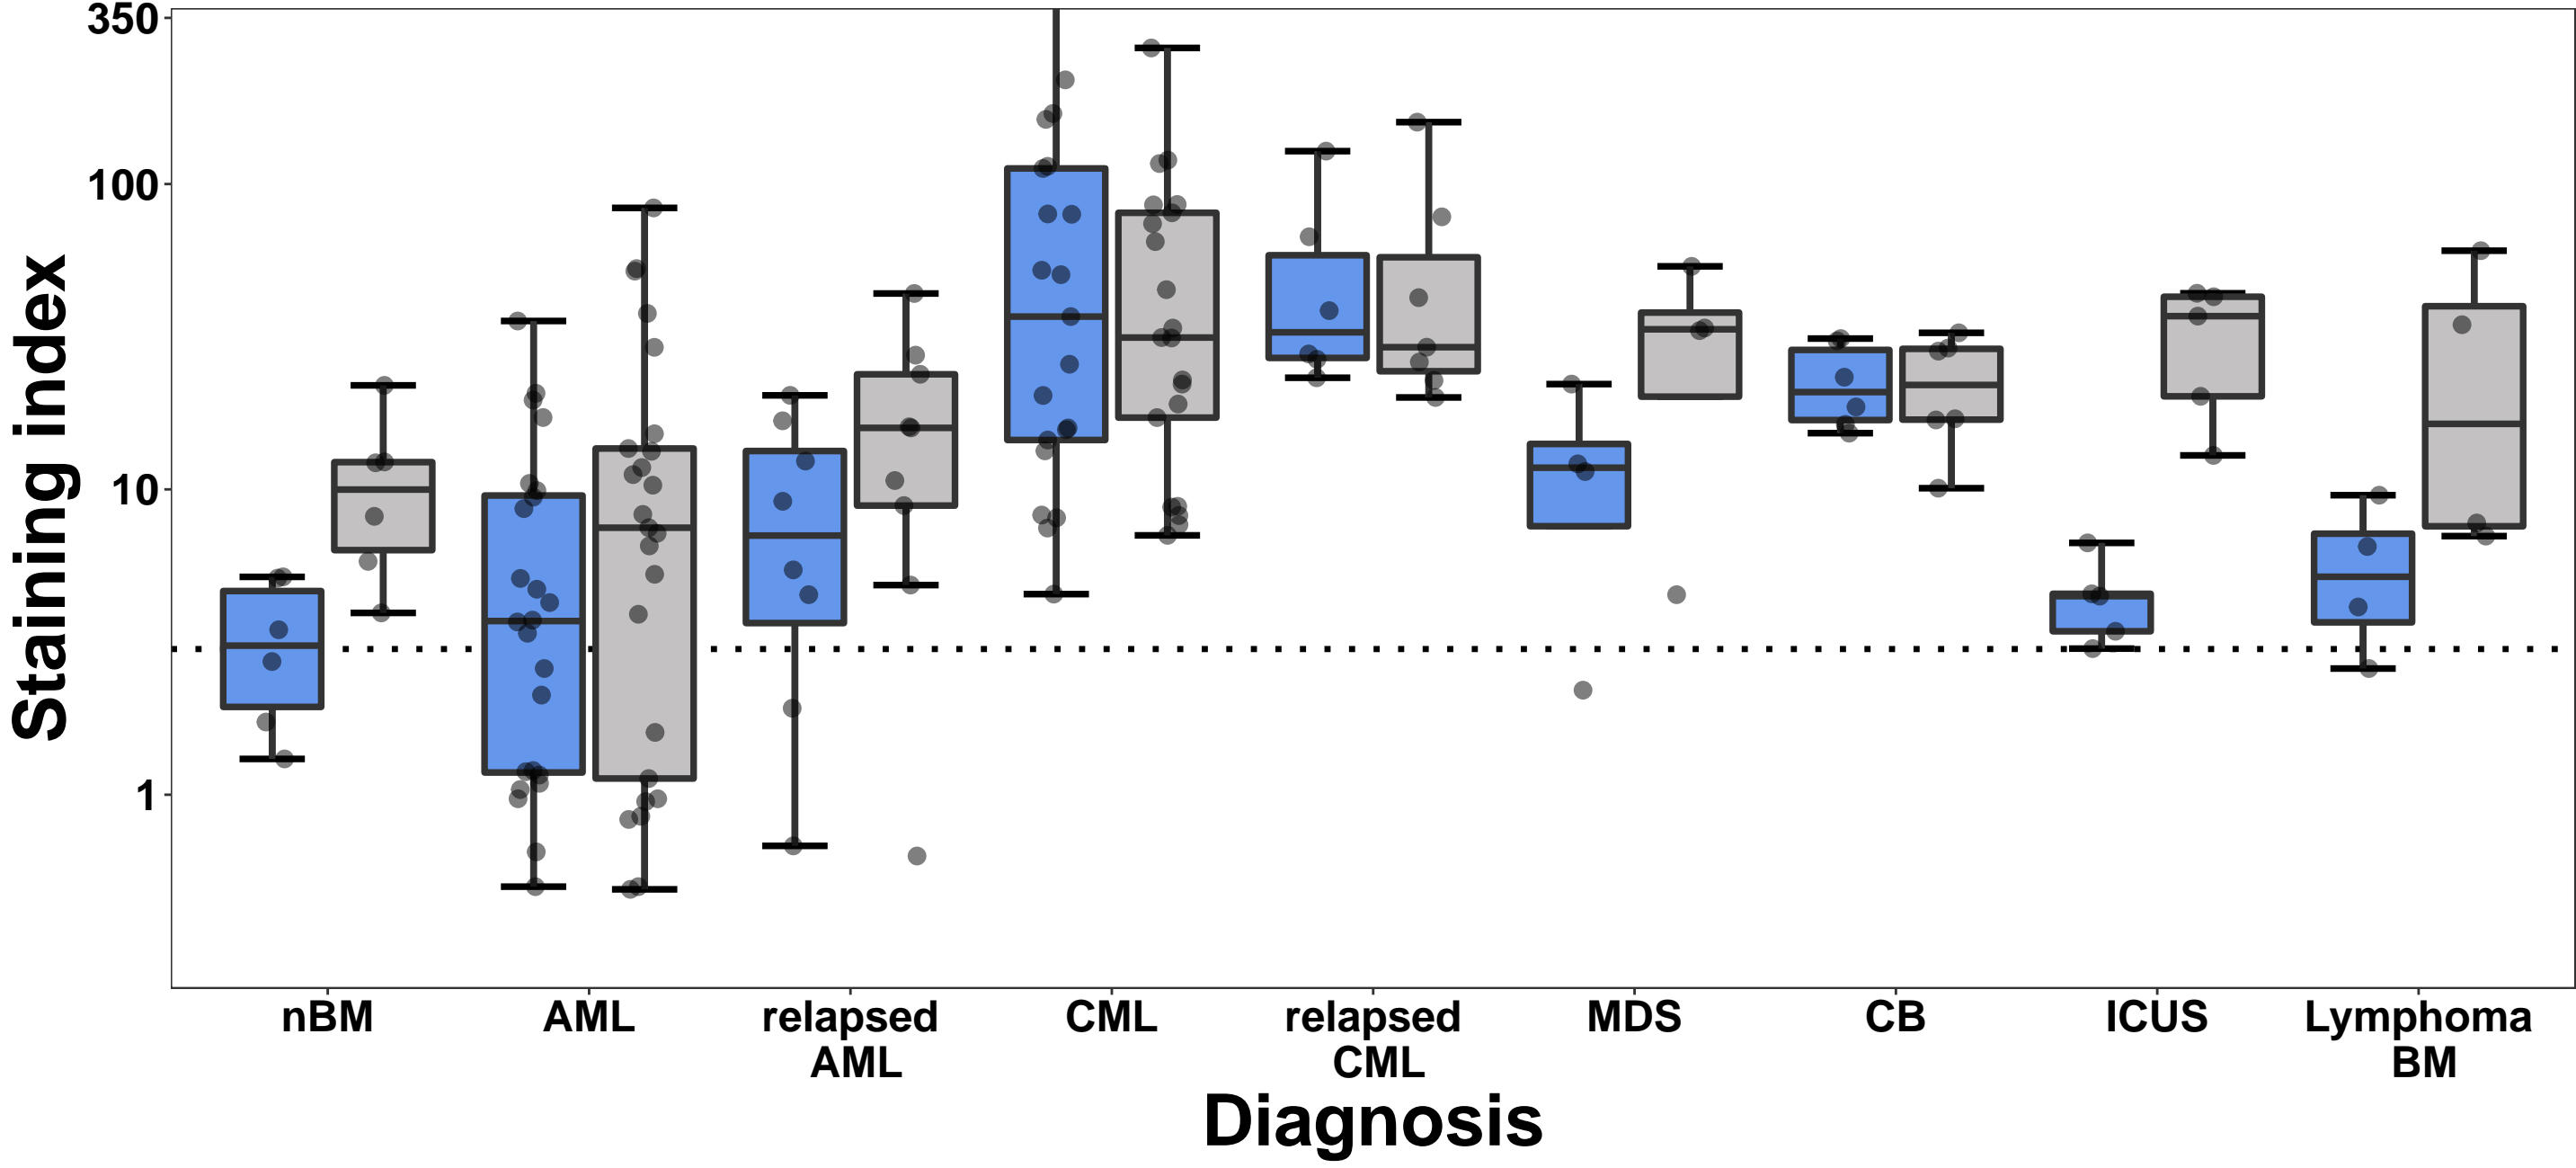

Cell fraction  CD34+/CD38-  CD34+/CD38+

# HLA-DR percentage

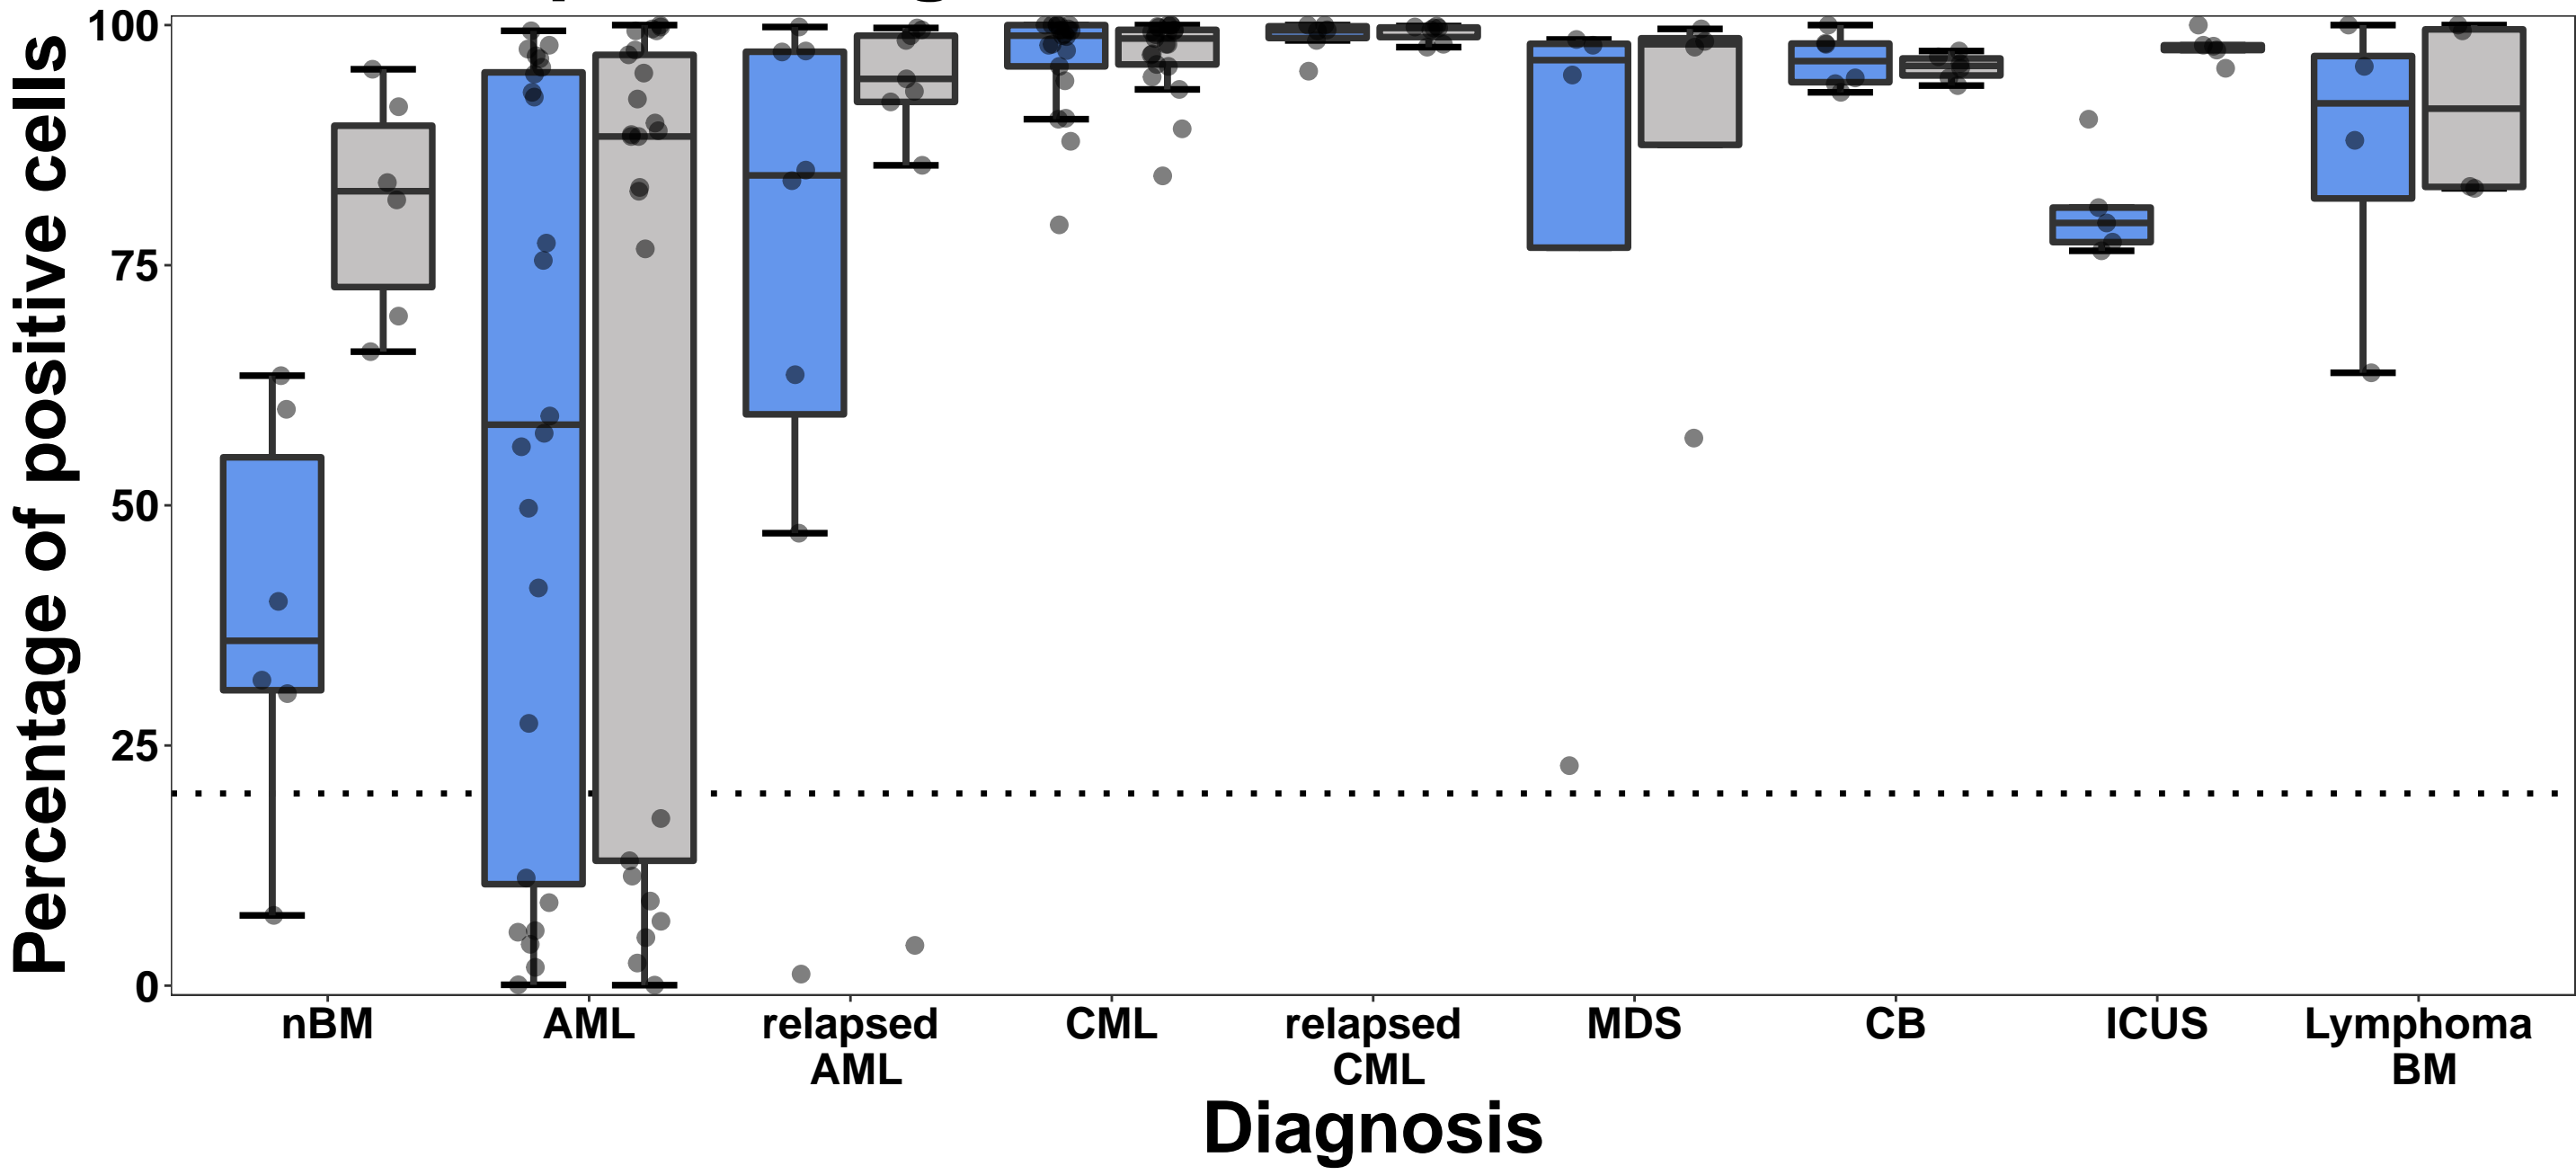

Cell fraction  CD34+/CD38-  CD34+/CD38+

# IL-1RAP staining index

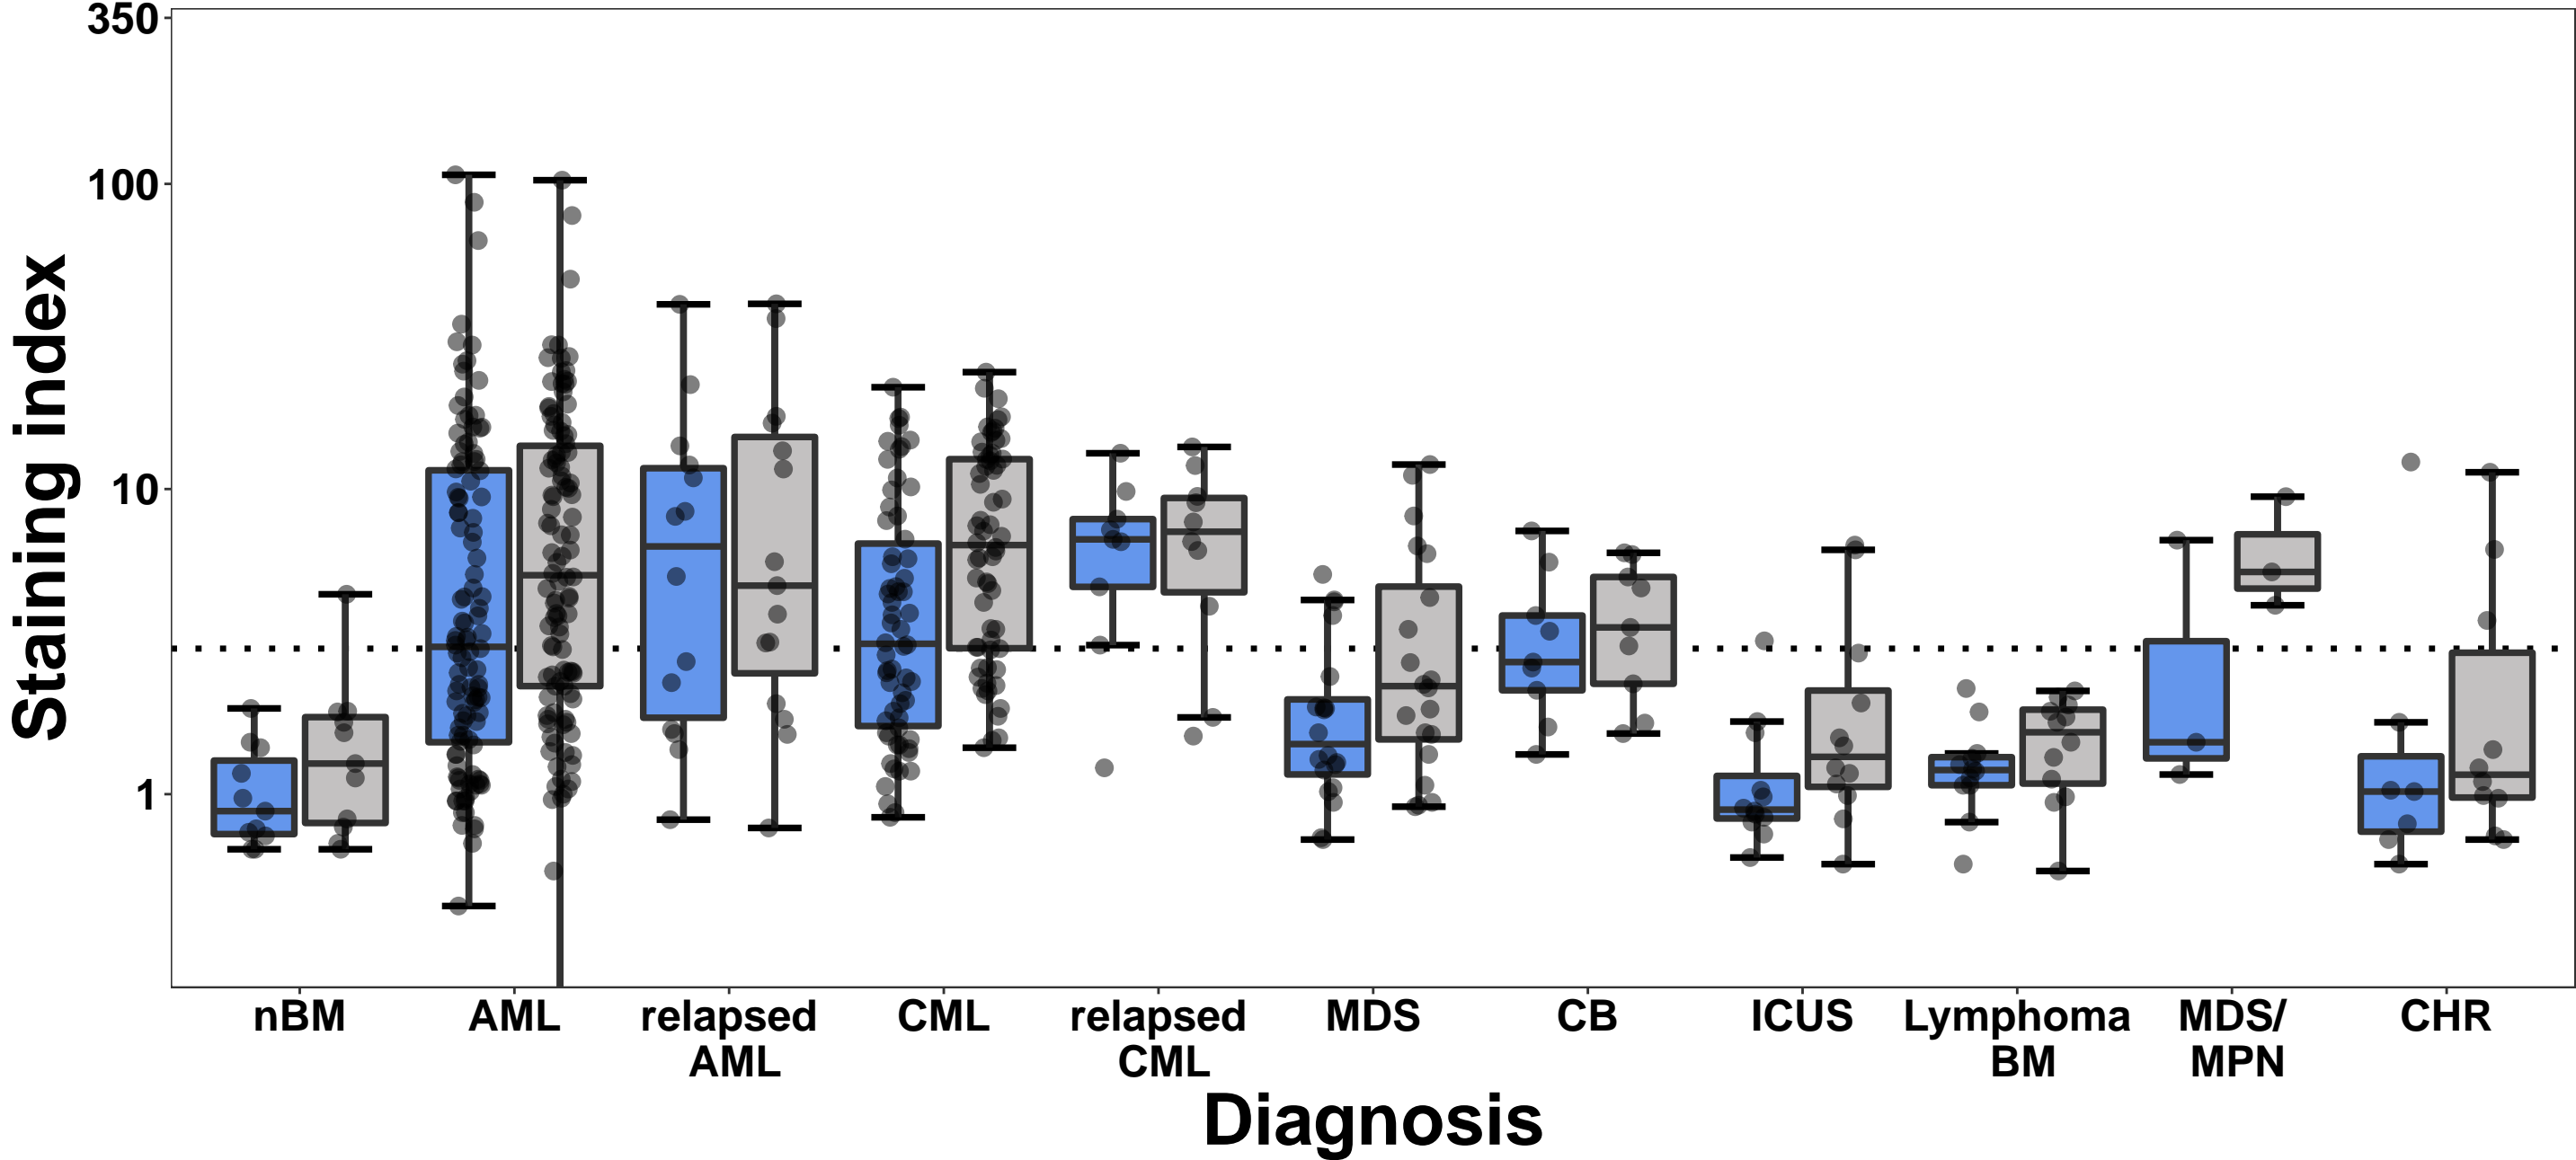

Cell fraction  CD34+/CD38-  CD34+/CD38+

# IL-1RAP percentage

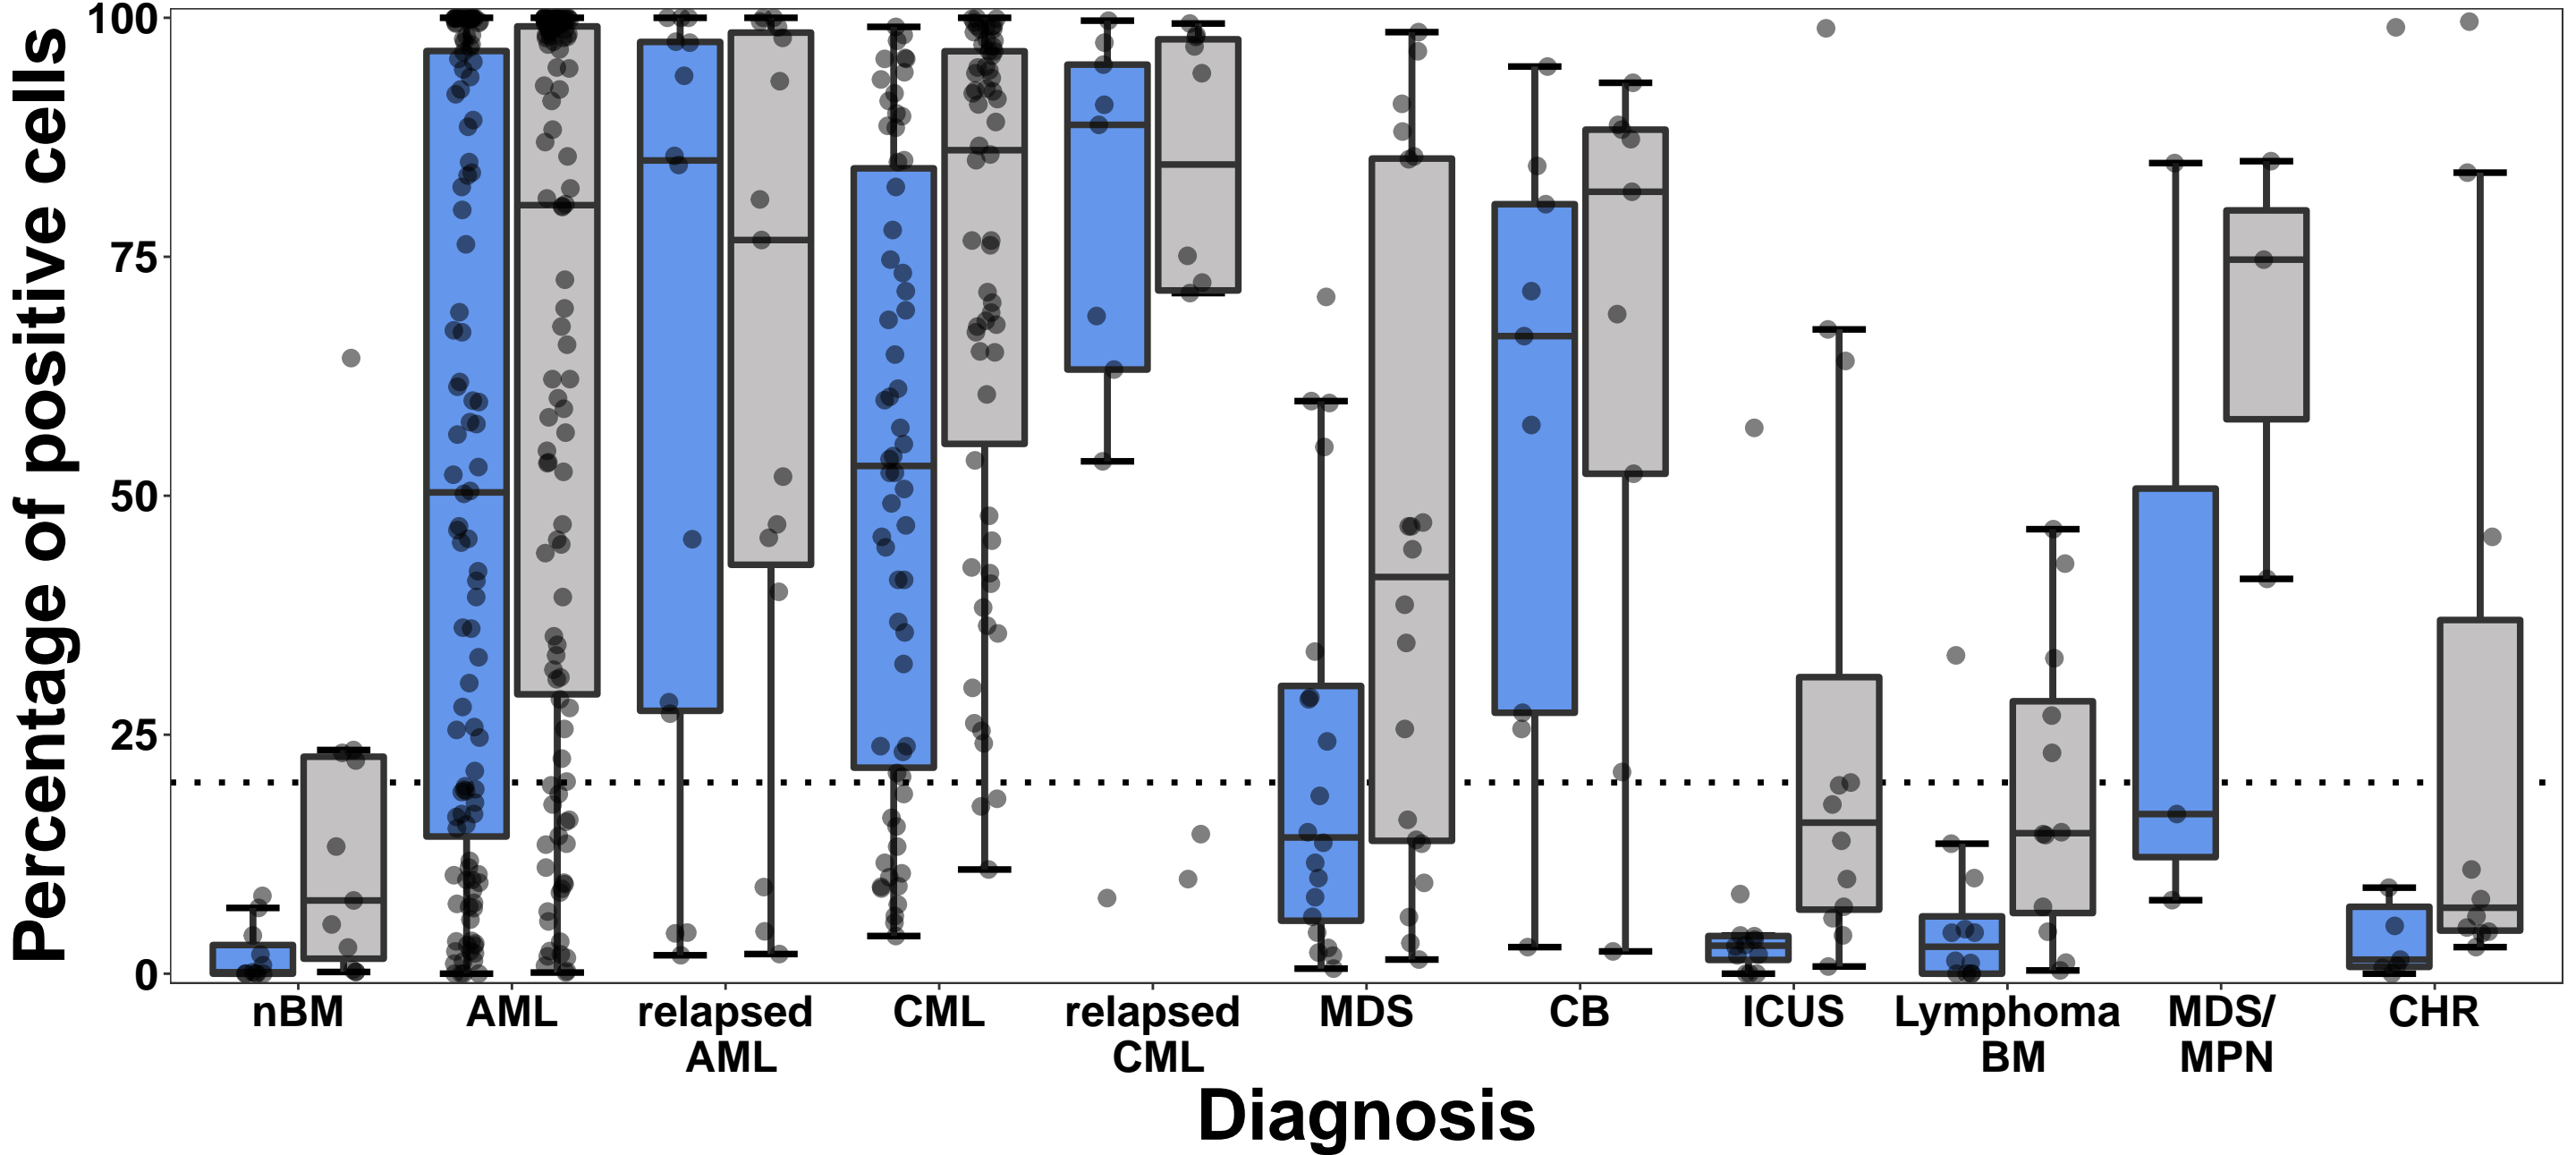

Cell fraction  CD34+/CD38-  CD34+/CD38+

# MET/HGFR staining index

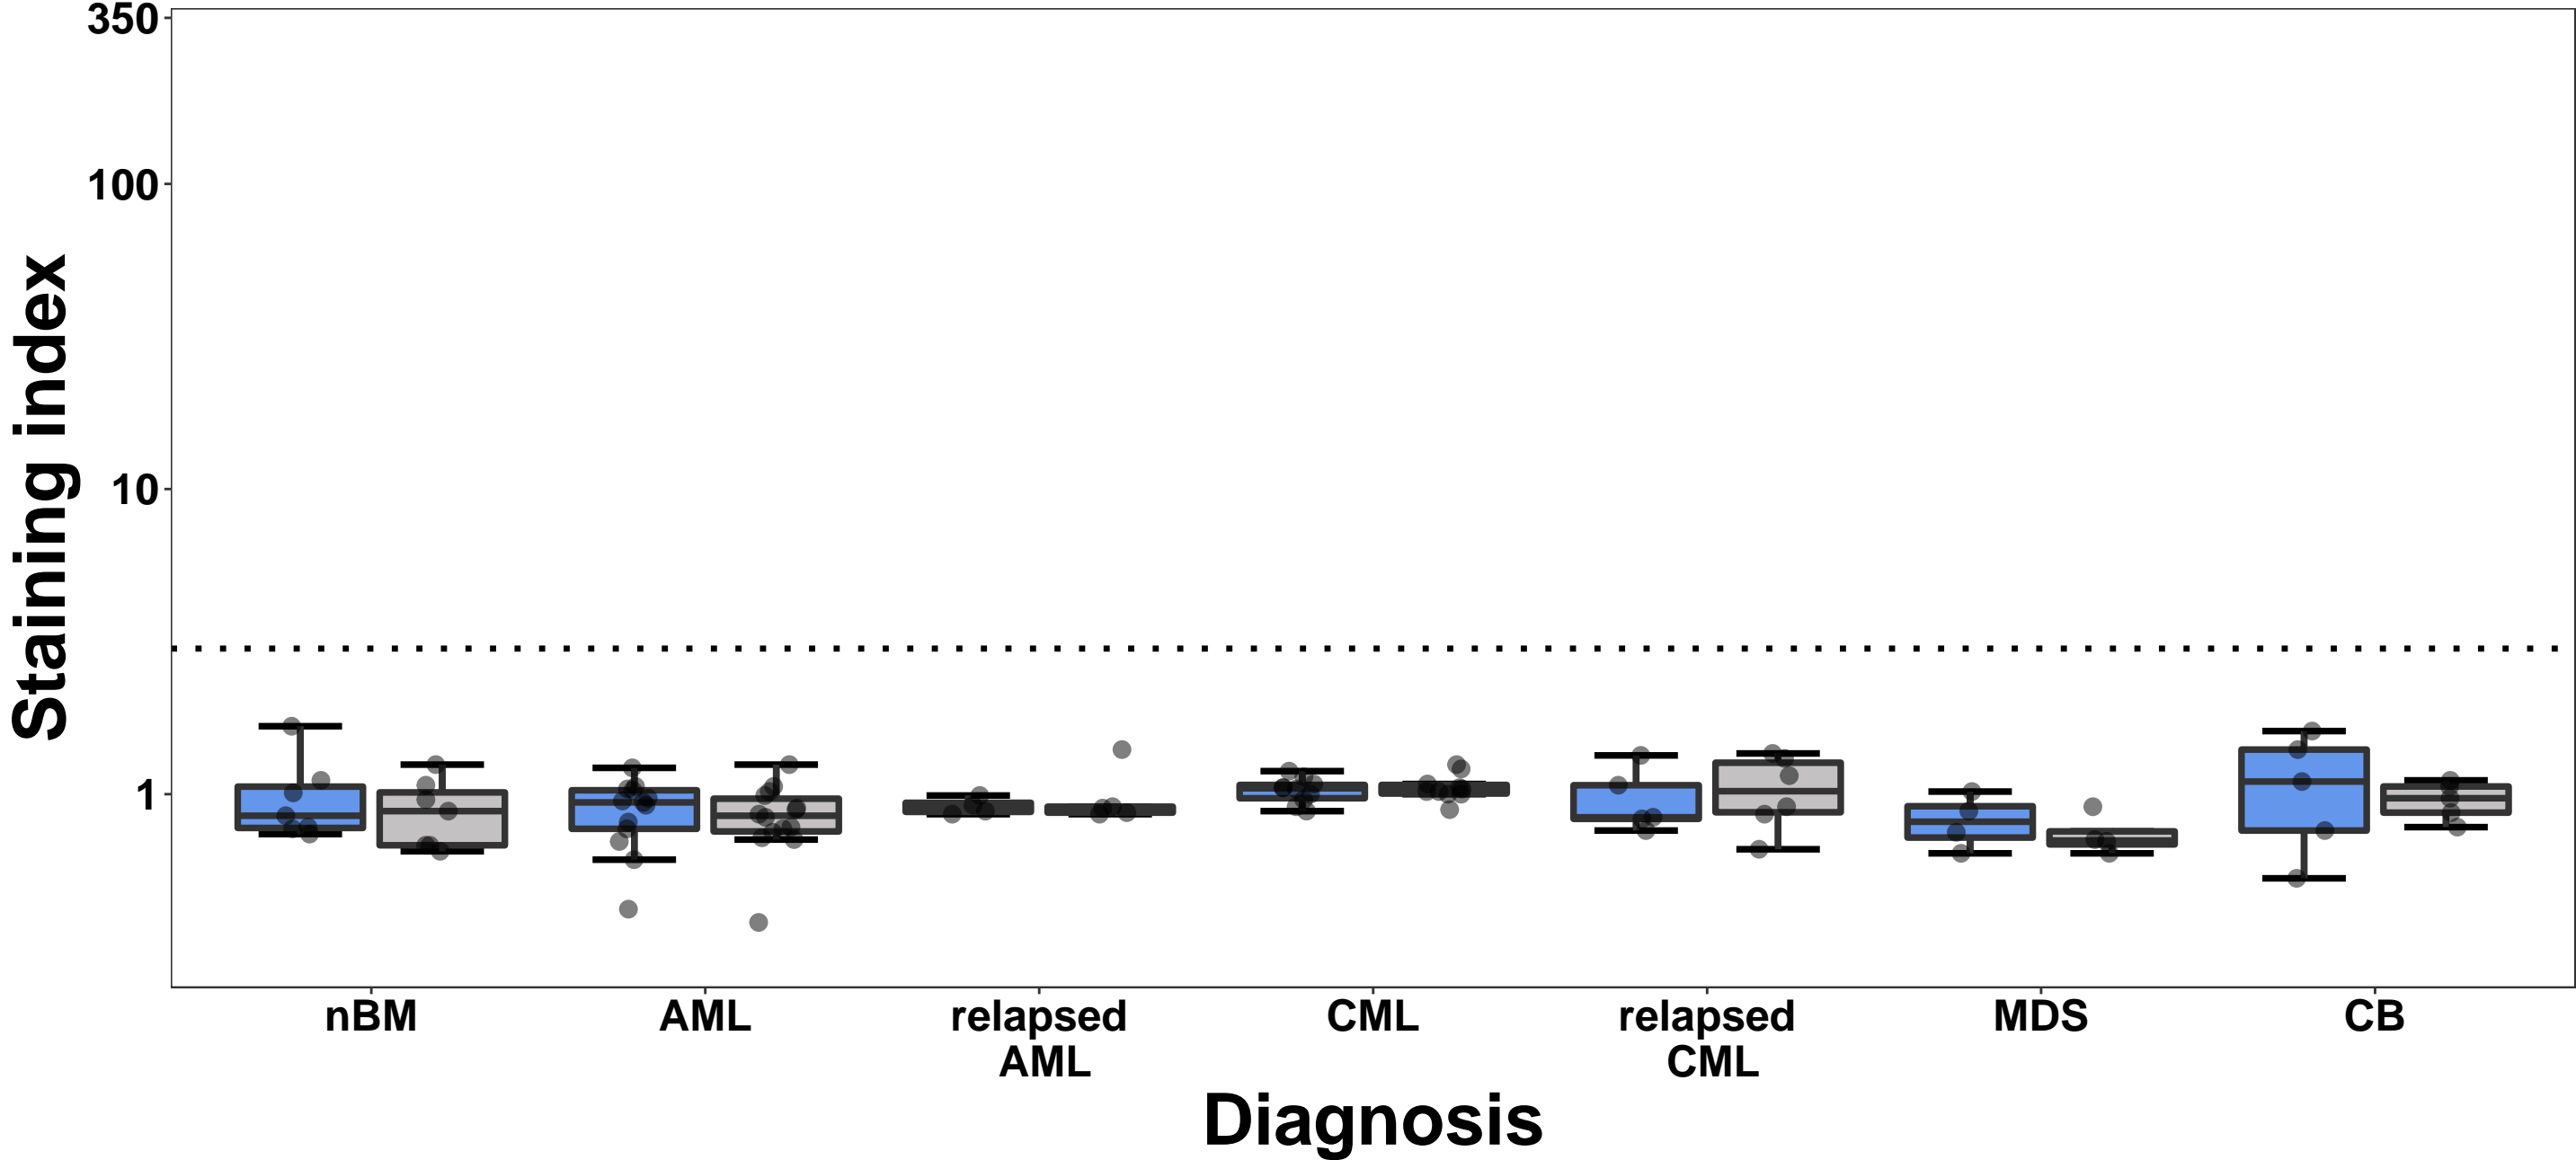



Cell fraction  CD34+/CD38-  CD34+/CD38+

# MET/HGFR percentage

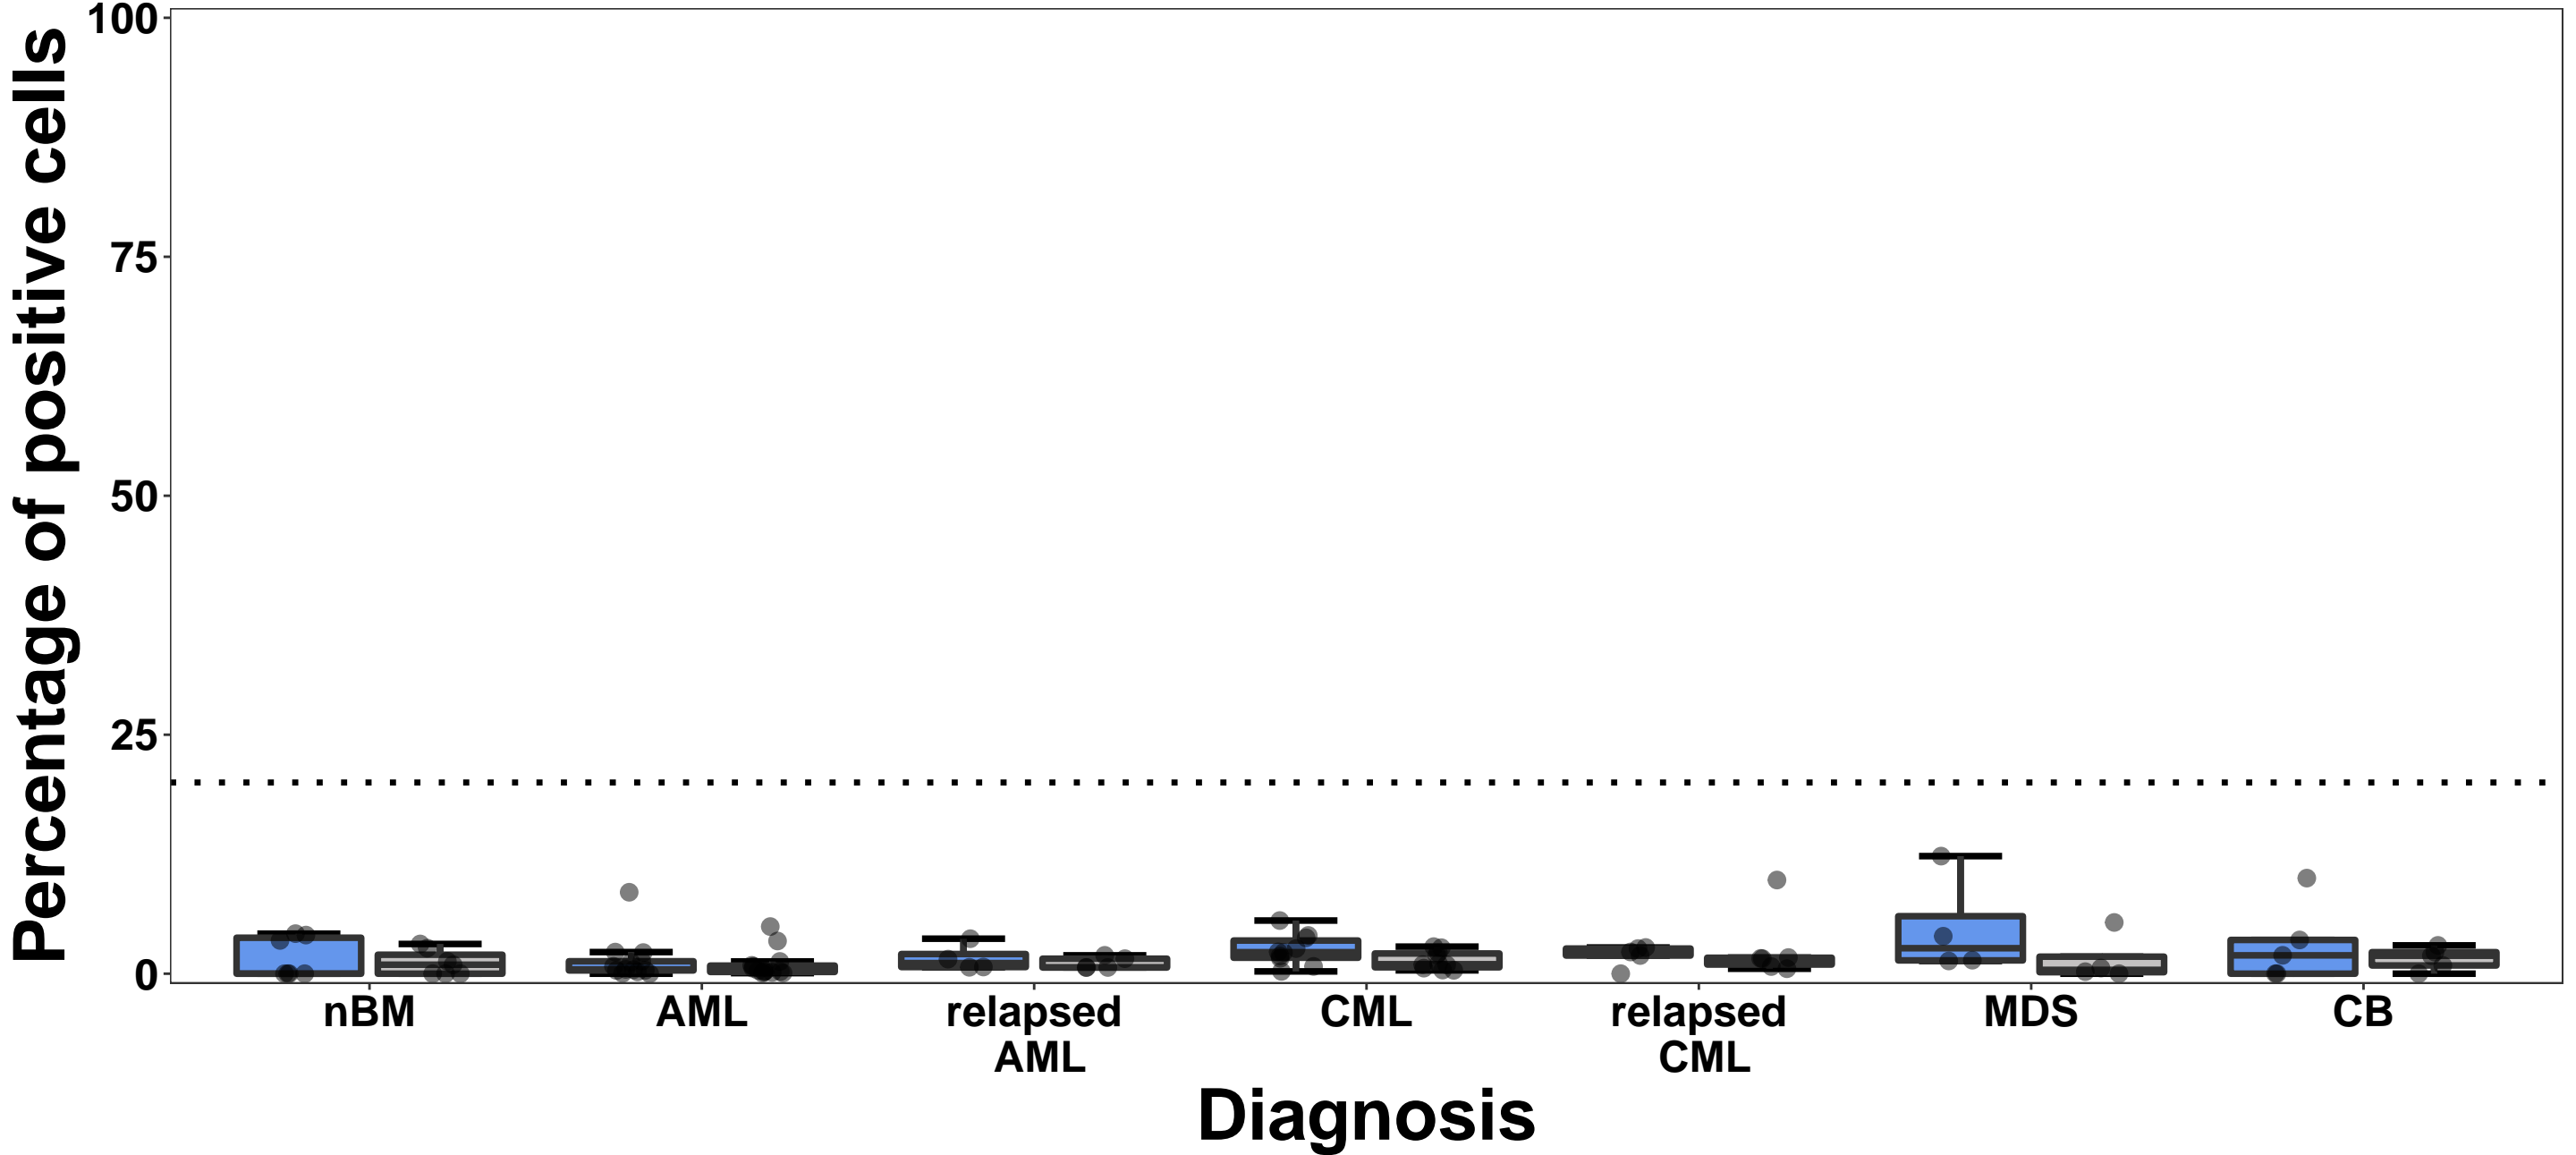

Cell fraction  CD34+/CD38-  CD34+/CD38+

# NPDC1 staining index

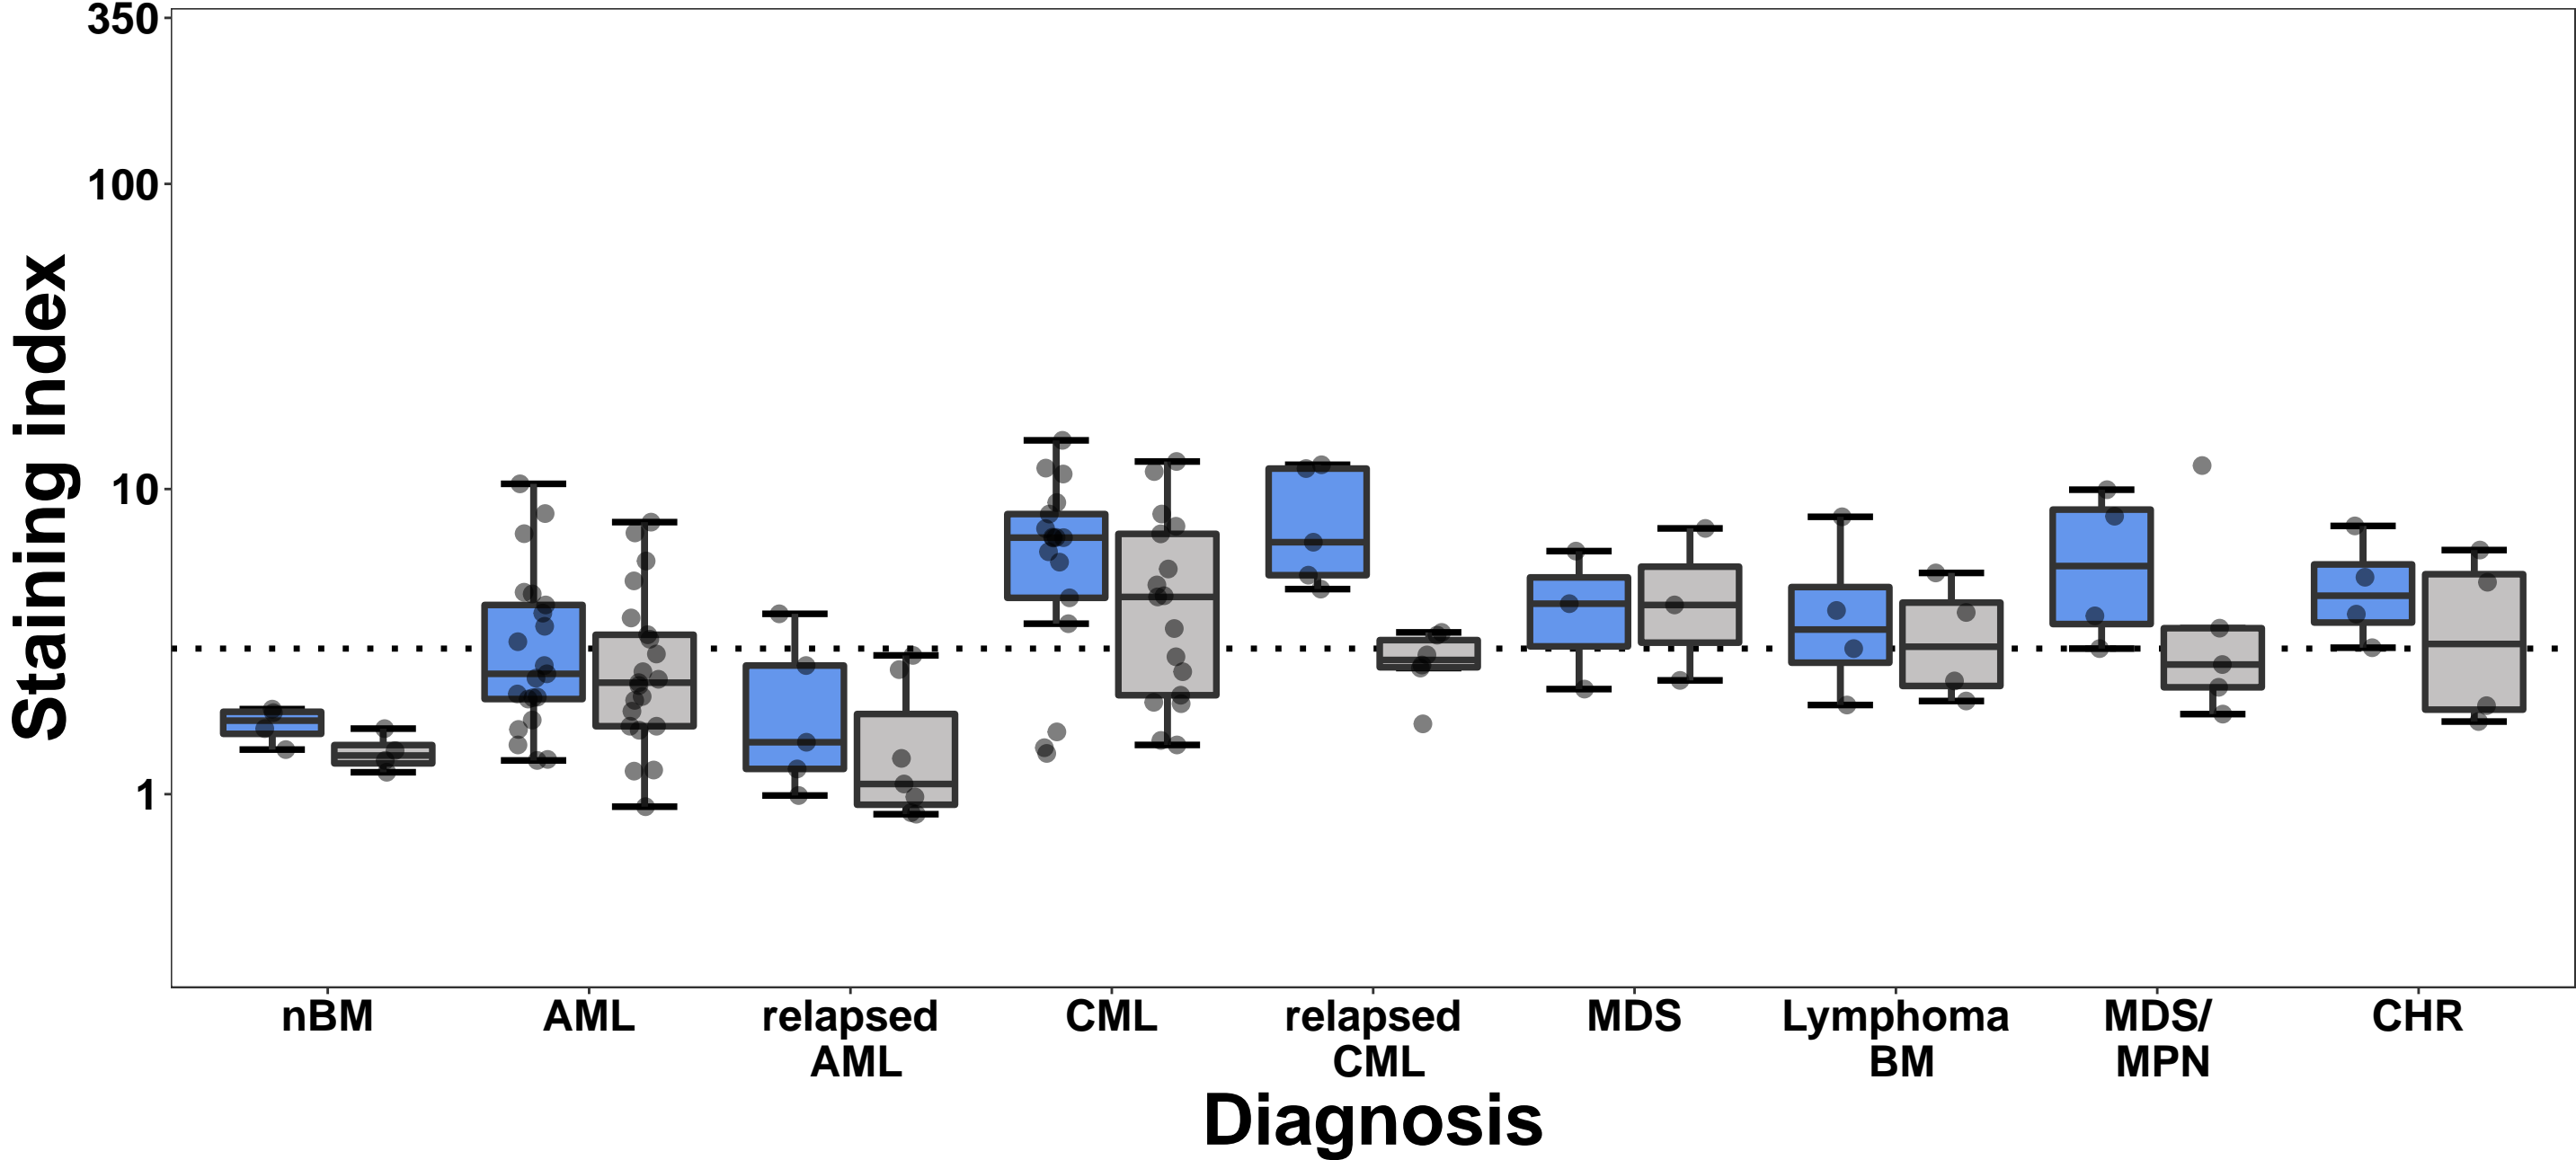

Cell fraction  CD34+/CD38-  CD34+/CD38+

# NPDC1 percentage

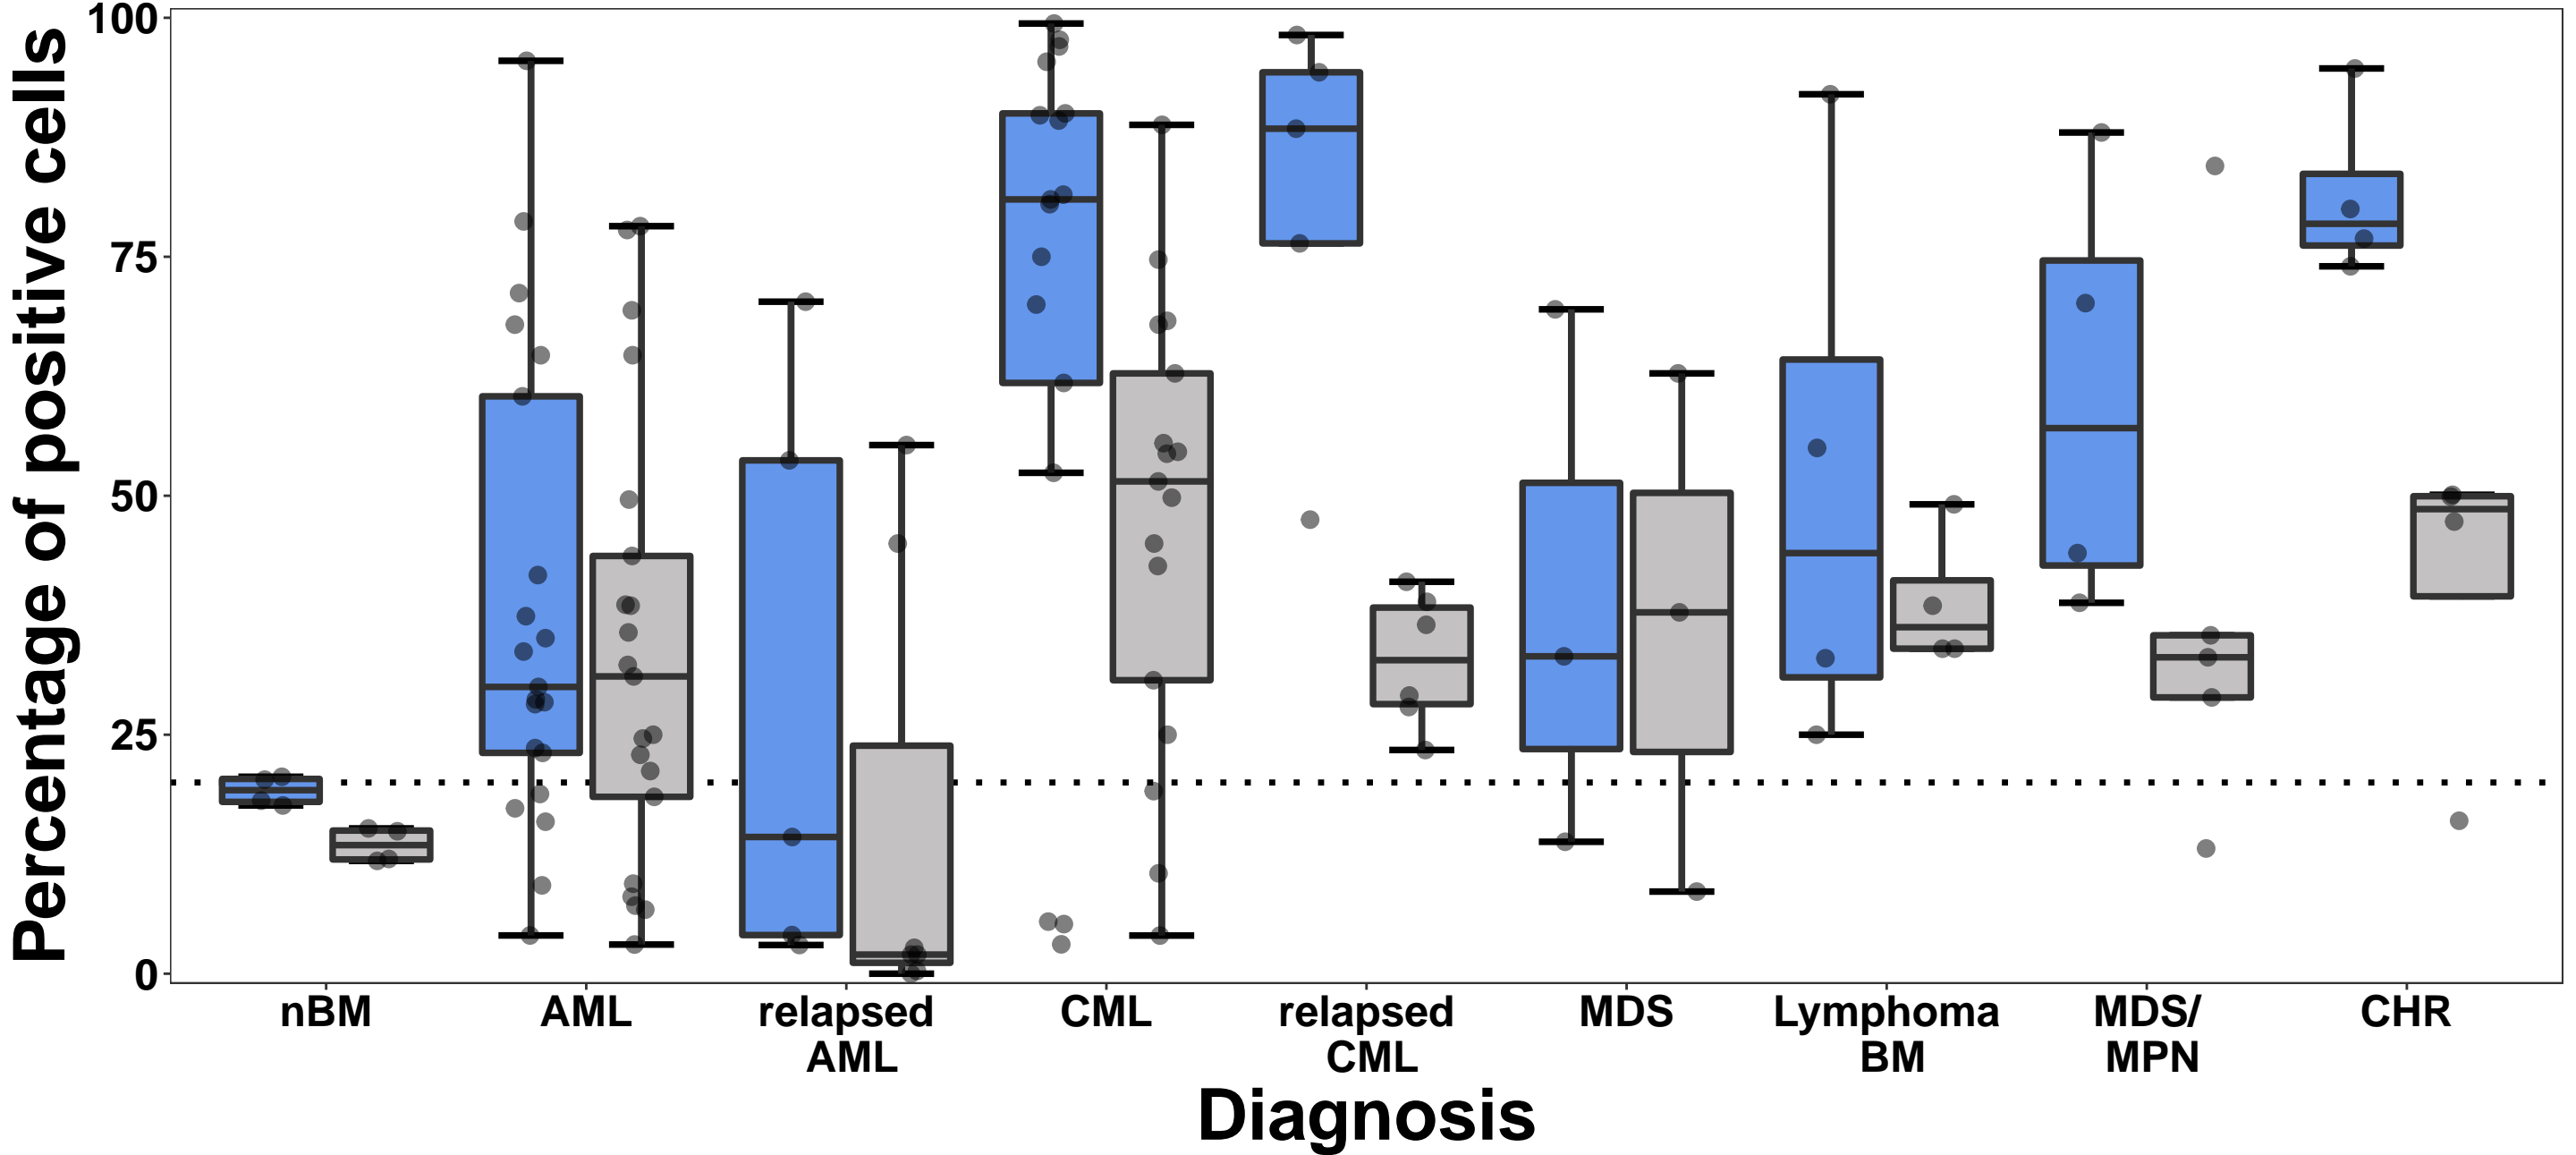

Cell fraction  CD34+/CD38-  CD34+/CD38+

# OSMRbeta staining index

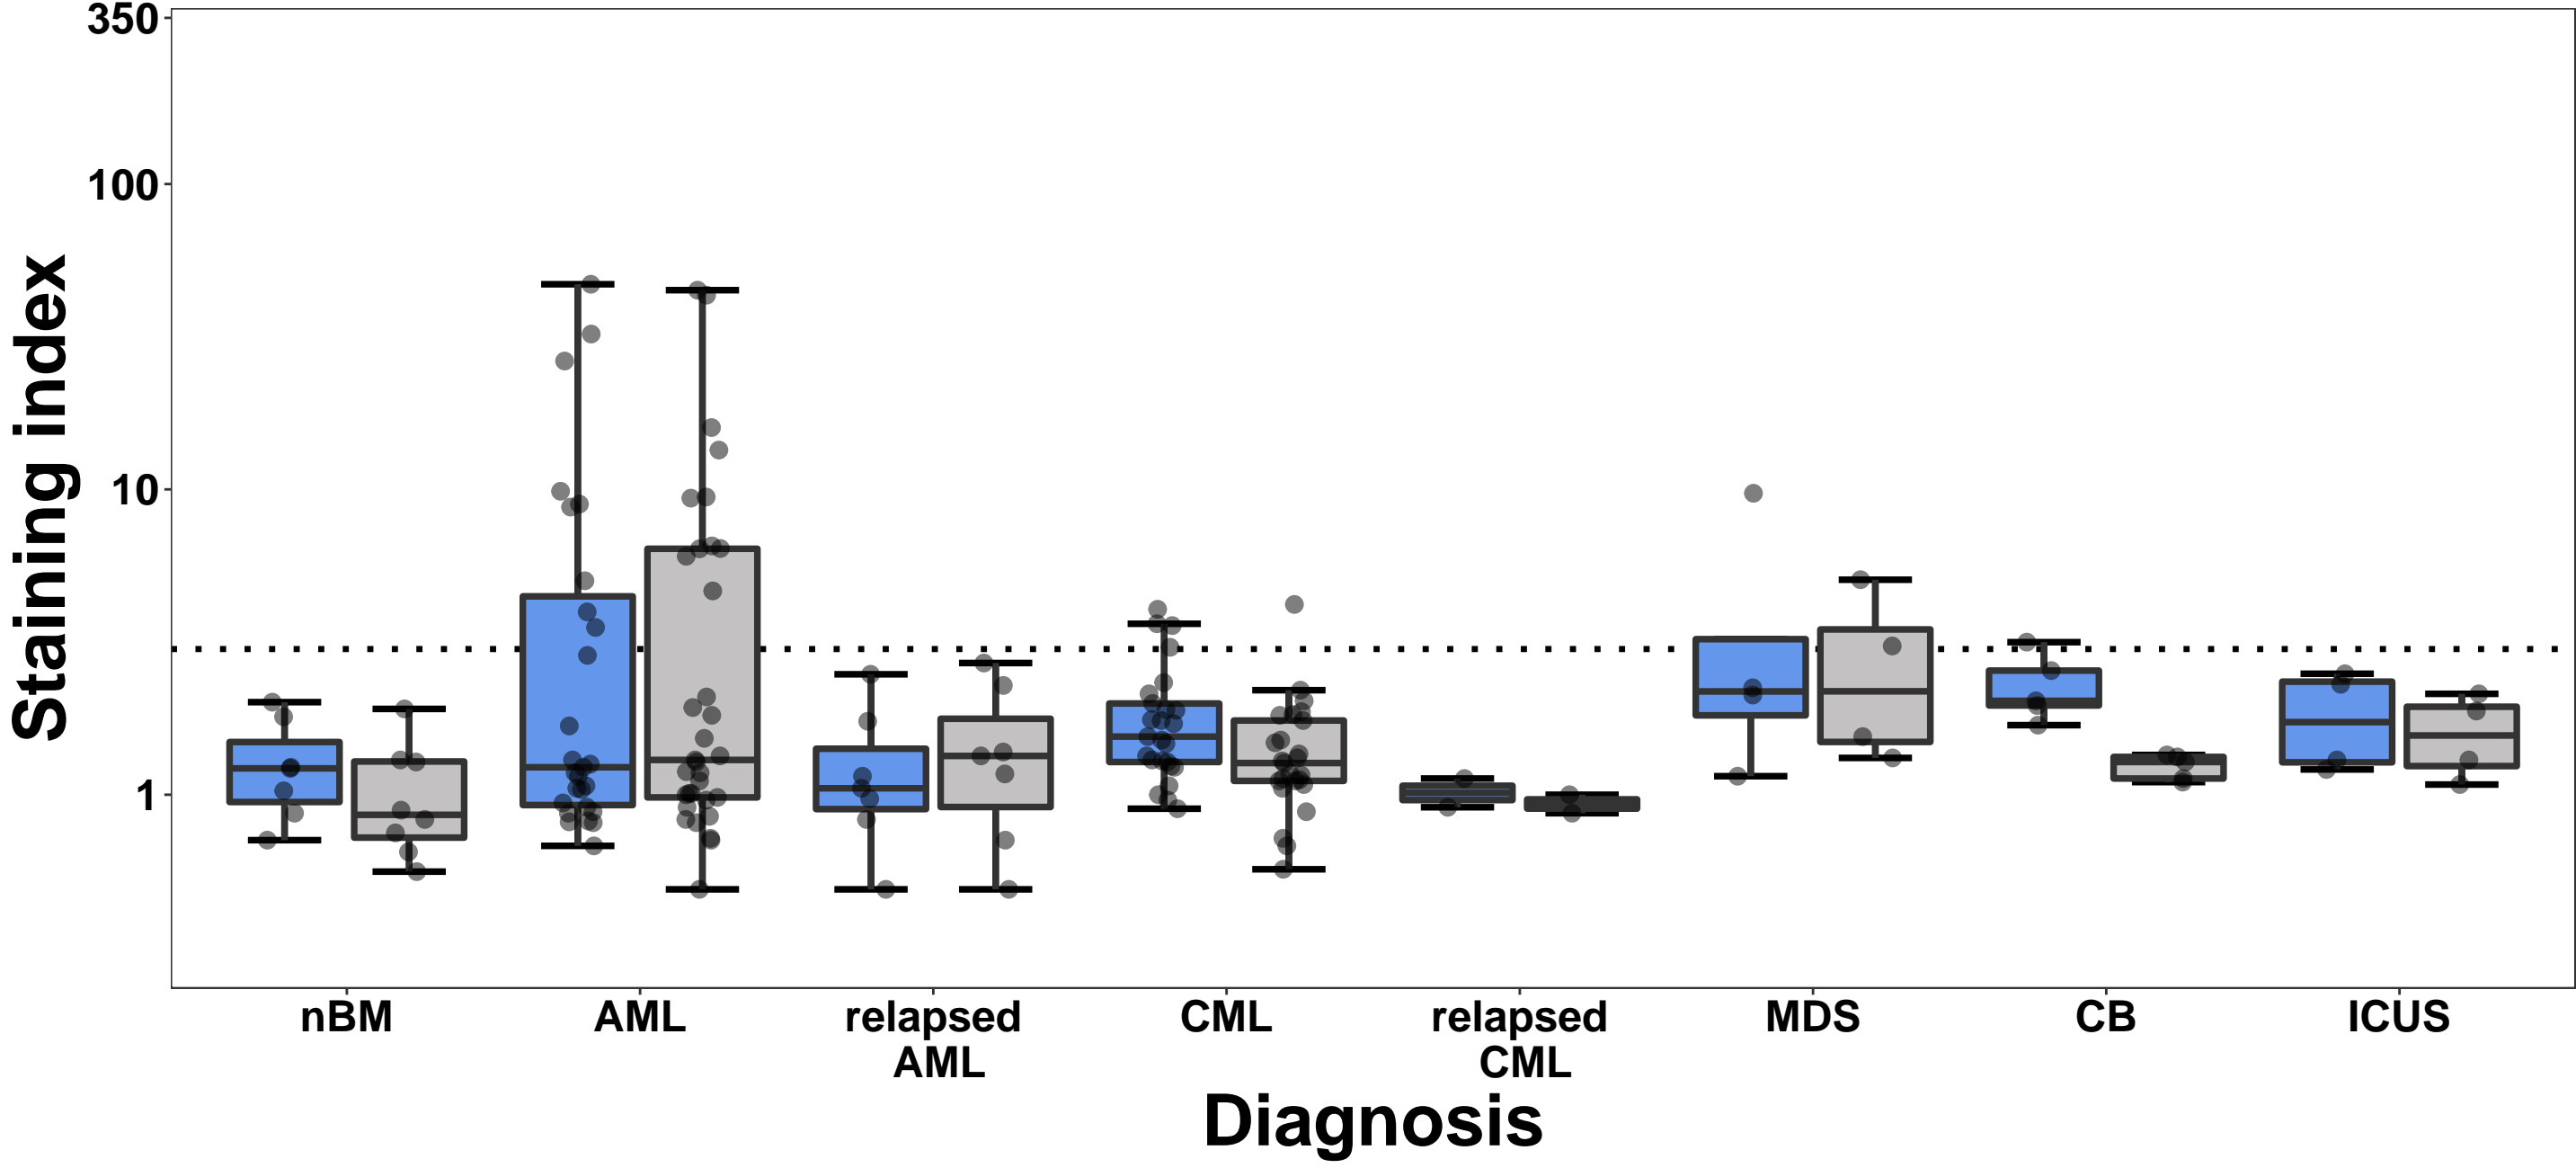

Cell fraction  CD34+/CD38-  CD34+/CD38+

# OSMRbeta percentage

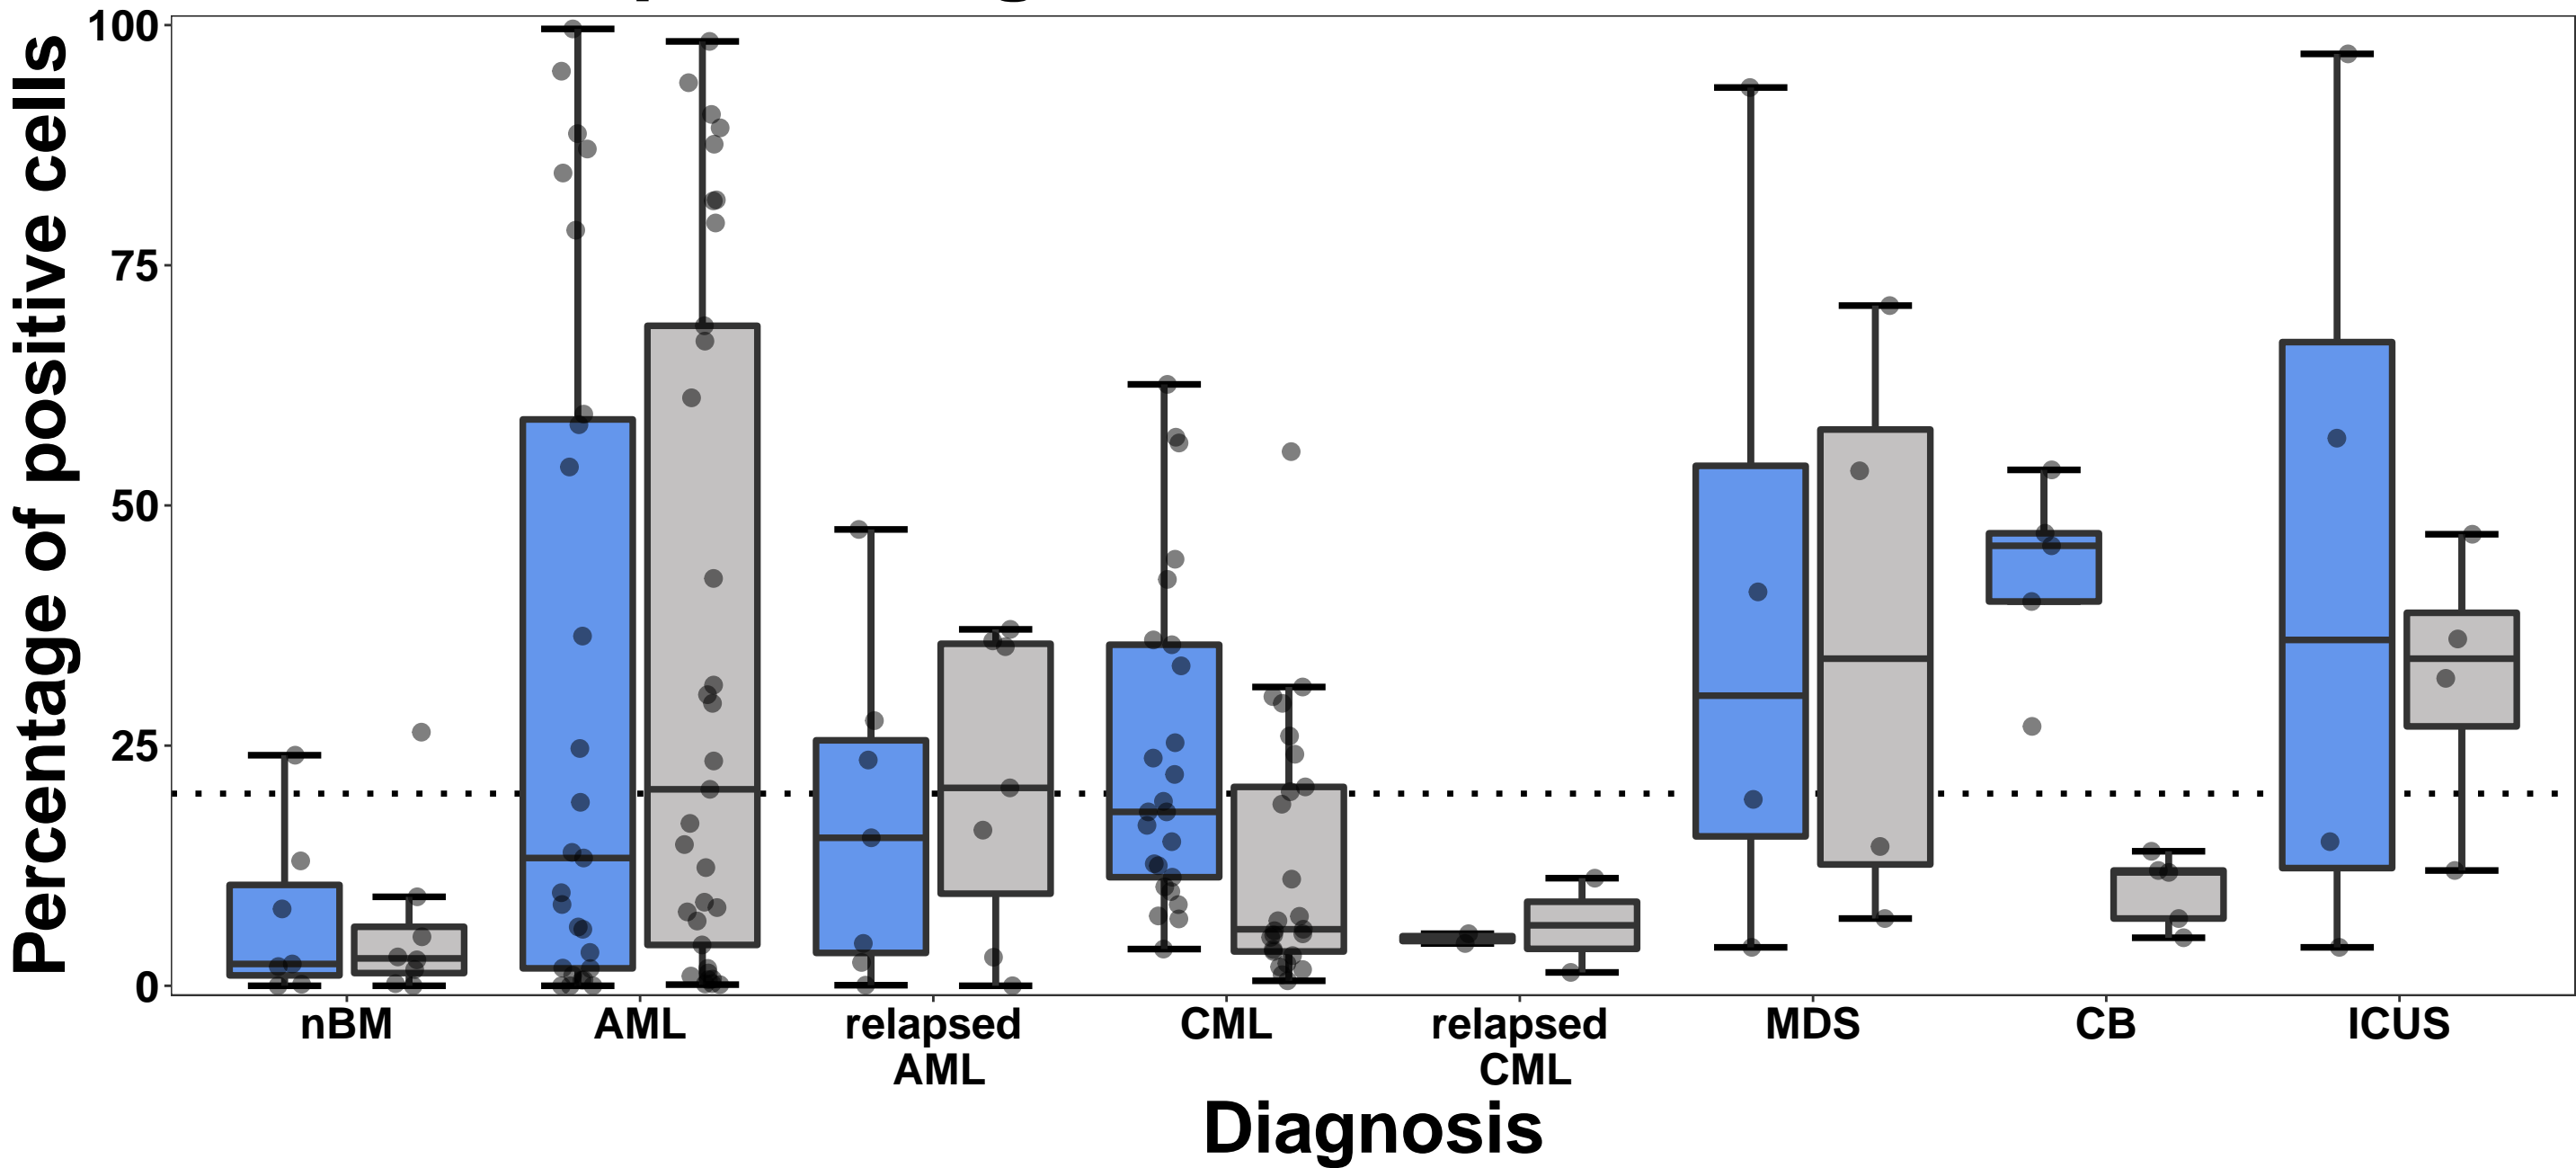

Cell fraction  CD34+/CD38-  CD34+/CD38+

# ROBO4 staining index

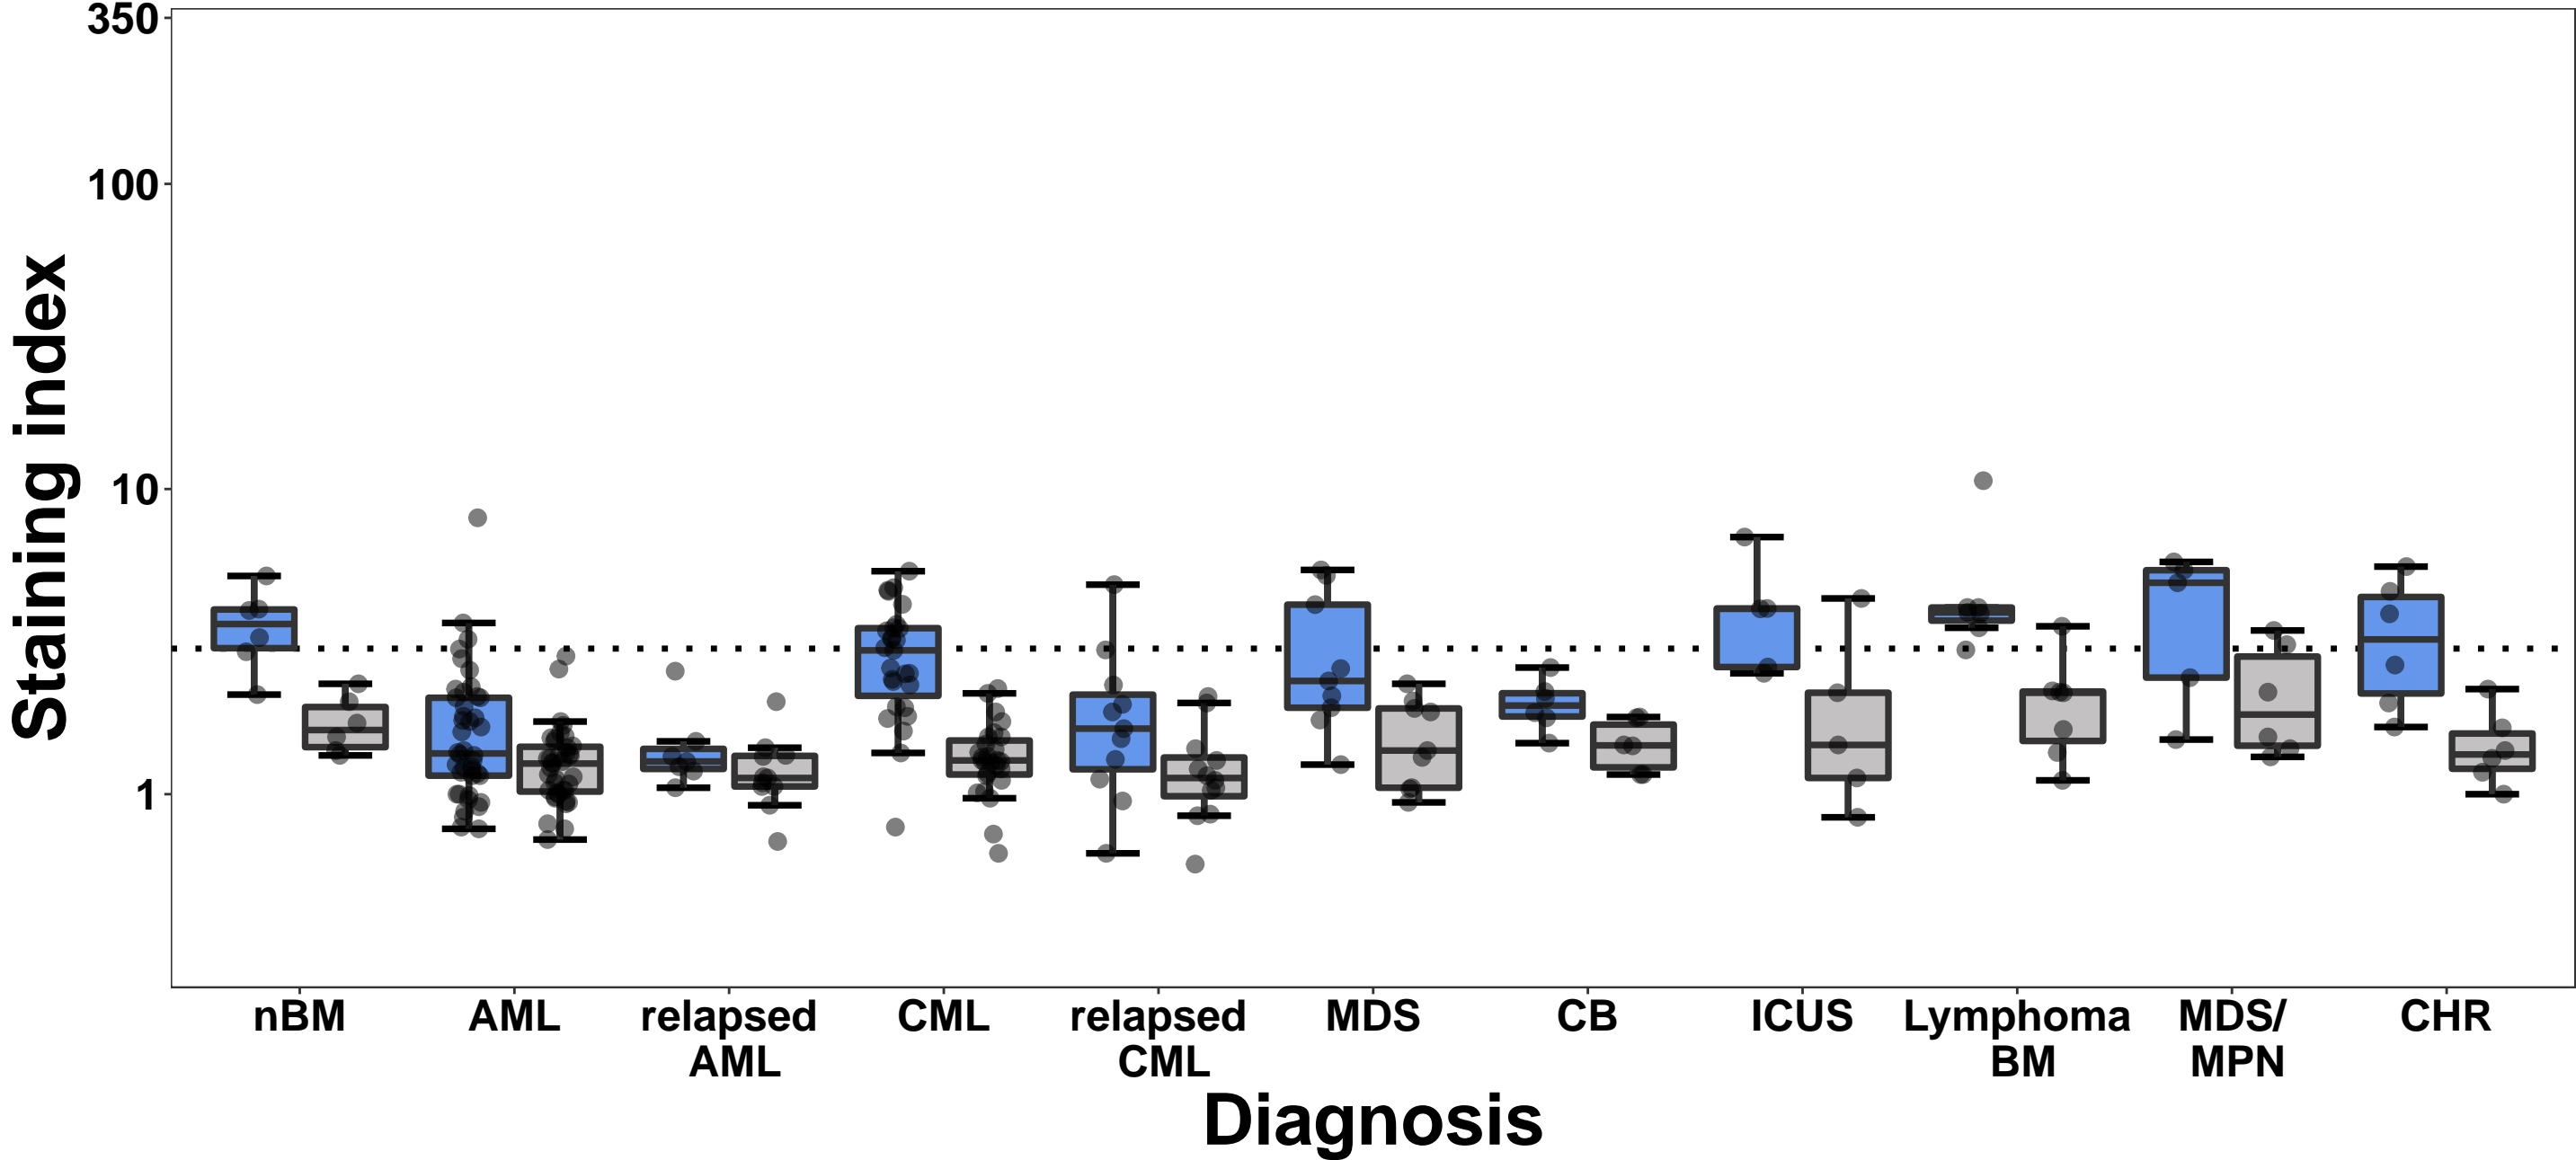

Cell fraction  CD34+/CD38-  CD34+/CD38+

# ROBO4 percentage

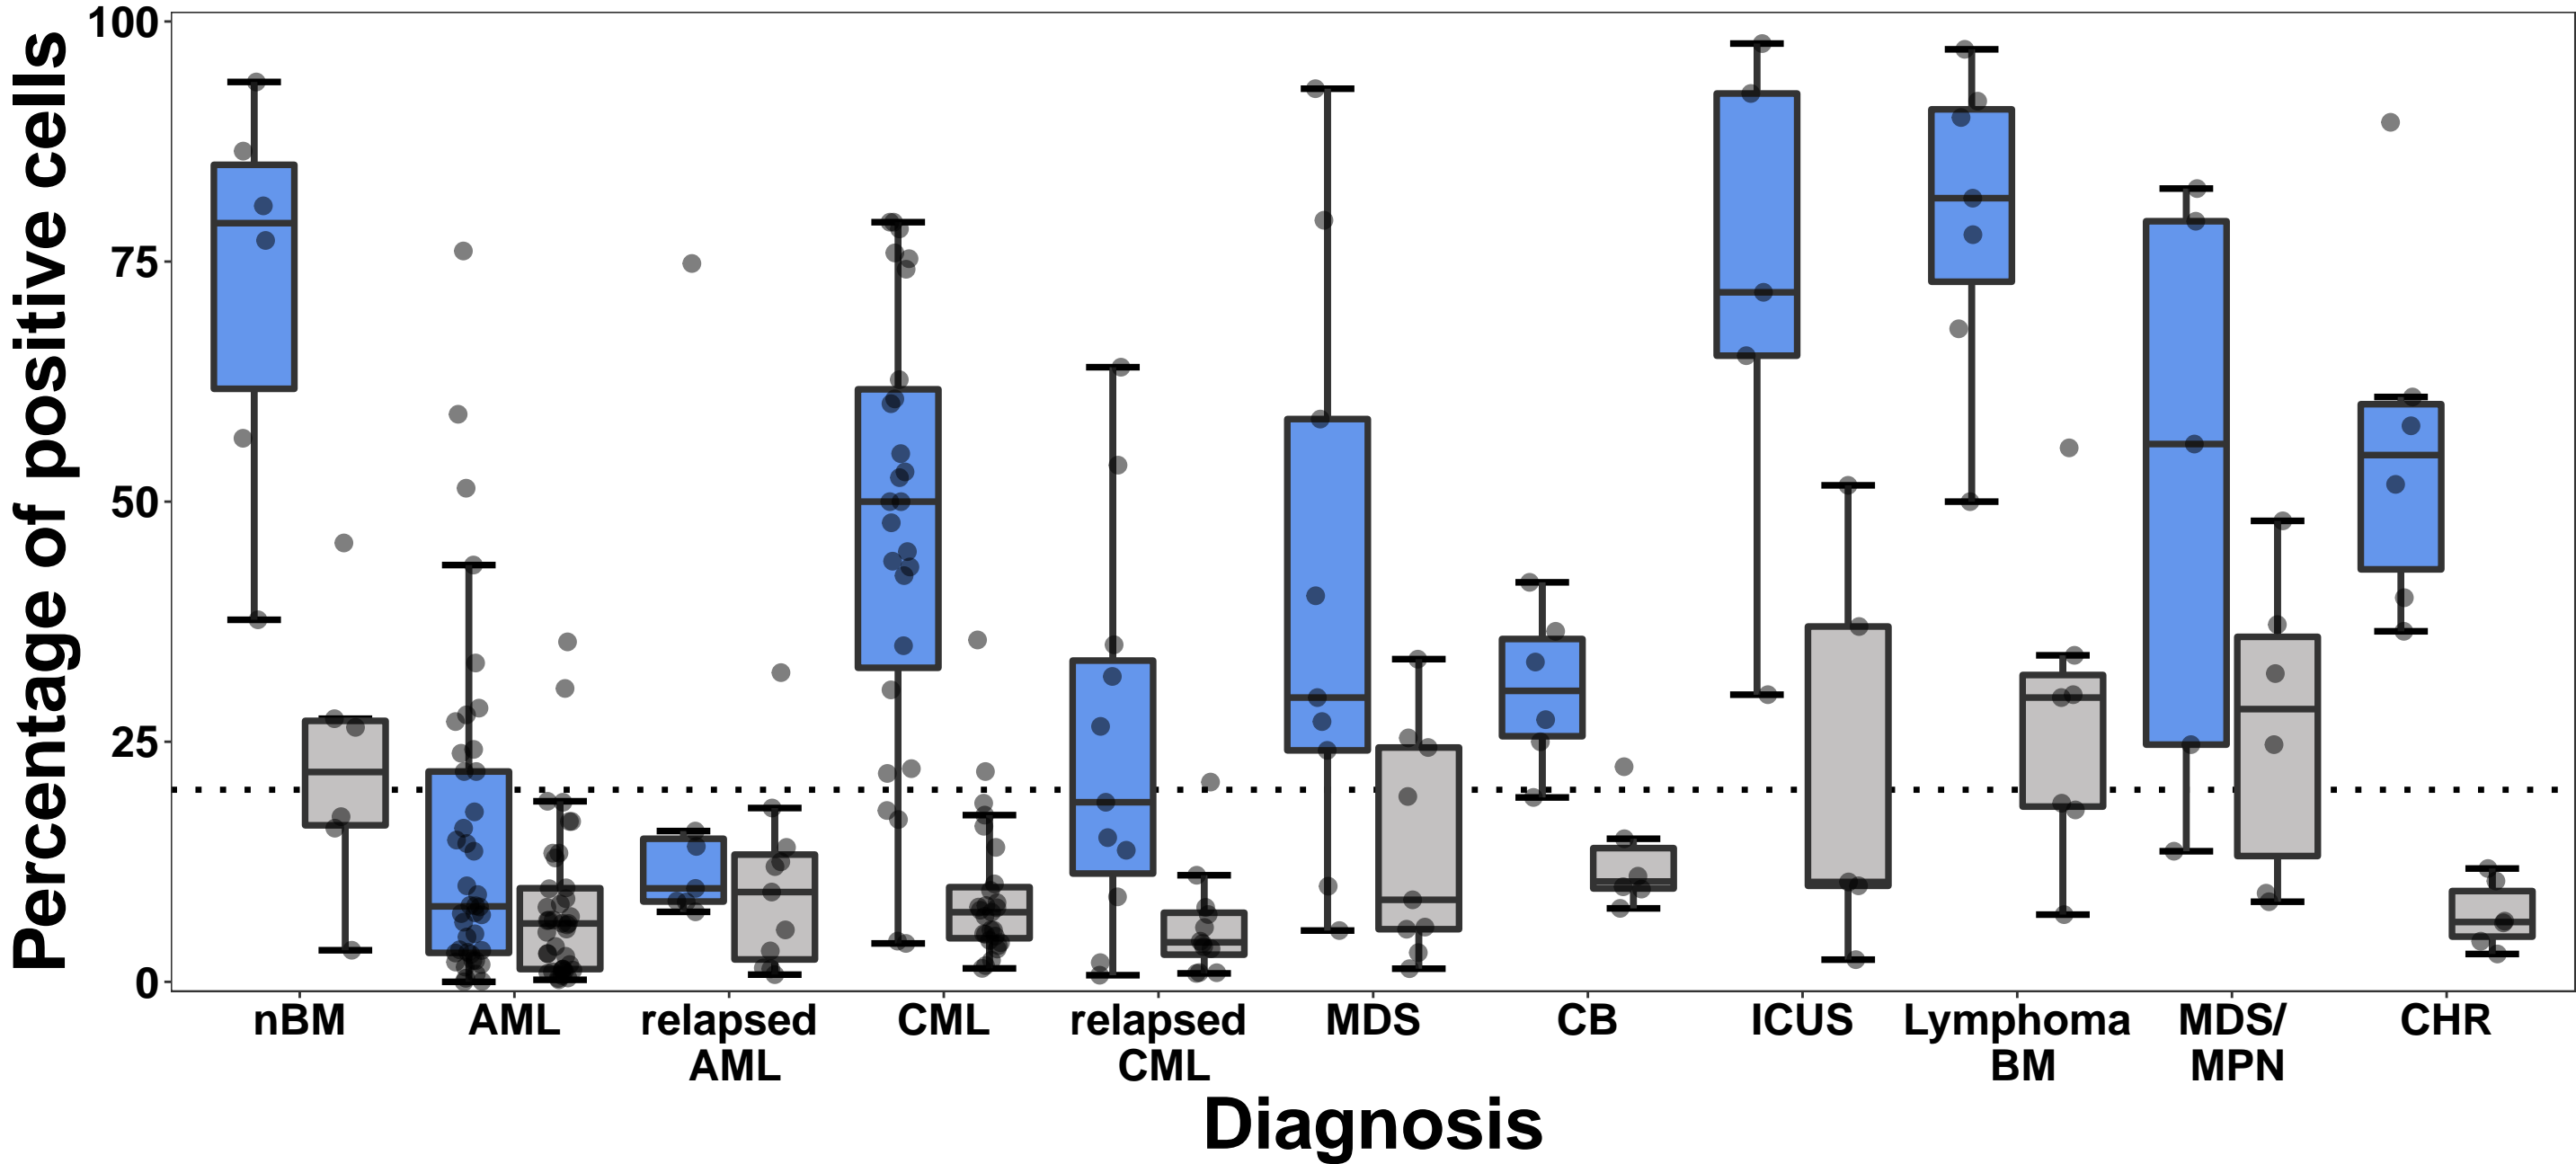

Supplement: advancesADV2020001742-suppl1.pdf [file advancesADV2020001742-suppl1.pdf]
