# Supplementary material
Source: PubMed Central journal article supplement (PMC7594398)
Supplement: advancesADV2020001742-suppl2.pdf [file advancesADV2020001742-suppl2.pdf]

## **Delineation of target expression profiles in CD34<sup>+</sup>/CD38<sup>-</sup> and CD34<sup>+</sup>/CD38<sup>+</sup> stem- and progenitor cells in acute (AML) and chronic (CML) myeloid leukemia**

### **Patients and Methods**

#### **Antibodies and other reagents**

A number of fluorochrome-conjugated monoclonal antibodies (mAb) were applied in this study (Table S1). For identification and phenotyping of normal and leukemic stem and progenitor cells (CD45<sup>+</sup>/CD34<sup>+</sup>/CD38<sup>-</sup> and CD45<sup>+</sup>/CD34<sup>+</sup>/CD38<sup>+</sup> cells), CD34 mAb 581, CD38 mAb HIT2, and CD45 mAb 2D1 or HI30 were applied as reported.<sup>1</sup> The screen-panel of mAb was established based on literature data and data obtained by gene array and qPCR screening. A specification of antibodies used in this study (n=93) is provided in Table S1. Most mAb were clustered in international workshops on human leukocyte differentiation antigens.<sup>2,3</sup> RPMI 1640 medium and fetal calf serum (FCS) were purchased from PAA laboratories (Pasching, Austria), <sup>3</sup>H-thymidine from Perkin Elmer (Waltham, MA, USA), recombinant human (rh) granulocyte colony-stimulating factor (G-CSF) from Amgen (Thousand Oaks, CA, USA) and from PeproTech (Rocky Hill, NJ, USA), rh interleukin-3 (IL-3) from Novartis (Vienna, Austria), rh stem cell factor (SCF) from PeproTech, and rh IL-2, rh EPO and rh SLIT2 from R&D systems (Minneapolis, MN, USA). The CD33-targeting drug

gentuzumab/ozogamicin (GO) (Mylotarg<sup>®</sup>) was kindly provided by Wyeth Austria. Midostaurin (PKC412) was purchased from LC Laboratories (Woburn, MA, USA), alemtuzumab (Mabcampath<sup>®</sup>) from Genzyme (Cambridge, MA, USA) and gilteritinib from Selleck Chemicals (Houston, TX, USA). The IL-2-diphtheria toxin-conjugate denileukin-diftitox was produced as reported.<sup>4</sup> The human BCR/ABL1+ CML cell line KU812 was kindly provided by Dr. K. Kishi (Niigata University, Niigata, Japan) and was maintained in RPMI 1640 medium, 10% FCS, and antibiotics at 37°C. The identity of the cell line was confirmed in 2016 by the German Collection of Microorganisms and Cell Cultures (DSMZ, Braunschweig, Germany) using nonplex-PCR. After confirmation, these cells were passaged once and multiple aliquotes were stored in liquid nitrogen for subsequent experiments. Knock-down studies with shRNAs against CD25 were performed as published previously.<sup>5</sup>

### **Patients, diagnostic evaluations and follow-up examinations**

A total of 274 patients with AML (121 females and 153 males), 97 patients with CML (47 females and 50 males) and 288 control cases were examined. The median age of our AML patients at diagnosis was 63 years (range: 19-92 years) and the median age of our CML patients at diagnosis was 55 years (range: 19-86 years). All patients gave written informed consent before bone marrow (BM) or peripheral blood (PB) samples were obtained. AML patients were classified according to criteria provided by the French-American-British (FAB) cooperative group and the World Health Organization (WHO).<sup>6-11</sup> AML patients in whom no CD34<sup>+</sup> blast cells could be detected were excluded from the study. The patients' characteristics are shown in Table 1 (main text) and Tables S2 (CML) and S3 (AML). In the CML patients examined, diagnoses and

the phase of disease were established according to the WHO proposal.<sup>10-13</sup> Of the 97 CML patients examined, 80 had chronic phase (CP), 9 had accelerated phase (AP), and 8 had blast phase (BP) of CML at the time of sampling. In 239 patients with AML, PB or BM cells (iliac crest or sternum) were analyzed at diagnosis or blast cell persistence after induction chemotherapy. In 42 of these patients, PB or BM samples were analyzed additionally at the time of relapse or disease progression or at the time of complete hematologic remission (CHR). In 35 patients with AML, PB or BM samples were only analyzed at the time of relapse or disease progression. In 82 patients with CML, PB or BM samples were analyzed at diagnosis and in 29 of these patients PB or BM samples were additionally analyzed at the time of disease progression or at CHR. In 15 patients, PB or BM samples were only analyzed at the time of disease progression. In our AML patients, routine BM investigations (morphology, cytogenetics, PCR) were performed at the time of diagnosis, prior to each chemotherapy cycle, and at the time of relapse. In the CML patients examined, karyotype studies were performed in 3-month intervals during the first year; and later, after 12 months, in 6-48 month-intervals, depending on the molecular response. In general, we followed the recommendations of the European Leukemia Net (ELN).<sup>11-13</sup> *BCR-ABL1* mRNA levels were quantified in PB samples in 6-12 month intervals by qPCR and expressed as percent of *ABL* mRNA levels employing the International Scale (IS).<sup>11-13</sup> CML patients were treated with imatinib (400 mg daily per os) according to published guidelines.<sup>12,13</sup> In case of resistance or intolerance against imatinib, patients were treated with a second- or third generation tyrosine kinase inhibitor (TKI): nilotinib, dasatinib or bosutinib.<sup>12,13</sup> AML patients were treated with intensive chemotherapy, including 1-3 induction cycles (containing daunorubicin and

ARA-C in first induction) and up to 4 consolidation cycles with high-dose ARA-C (2x3 g/m<sup>2</sup> on days 1,3,5: age up to 60 years) or intermediate-dose ARA-C (2x1.5 g/m<sup>2</sup> on days 1,3,5: age >60 years) or stem cell transplantation.<sup>14-20</sup> In those who were not eligible for intensive therapy (because of comorbidities or age or a clear pre-phase of a myelodysplastic syndrome, MDS) or refused chemotherapy, 5-azcytidine or experimental drugs were administered. Hydroxyurea (HU) was used as palliative cytoreductive drug. Survival and progression-free survival were captured in the follow up (until death or loss for follow up) in all patients. All patients gave their written informed consent before PB or BM samples were collected. Information about control patients is provided in Table S4 (other bone marrow-derived neoplasms) and Table S5 (lymphoma, normal bone marrow, premalignant conditions). Subgroup analyses were performed in patients with MDS (n=58), myelodysplastic/myeloproliferative overlap neoplasms (MDS/MPN) (n=23), and idiopathic cytopenia of undetermined significance (ICUS, n=40). Normal BM cells were purchased from Lonza (Basel, Switzerland) (n=17) or were obtained from patients with Non-Hodgkin's lymphoma (NHL) or Hodgkin's lymphoma (n=98) or patients with suspected BM neoplasm (n=24). Cord blood (CB) samples (n=26) were examined after written informed consent was obtained from mothers. All studies were approved by the ethics committee of the Medical University of Vienna.

### **Cell sampling and storage**

A total number of 878 cell samples, including 381 AML samples, 202 CML samples and 295 control samples were analyzed. All samples were collected during routine investigations. BM aspirate samples were obtained from the iliac crest or sternum after

local anesthesia. Stabilizer-free heparin (Biochrom AG, Berlin, Germany) was used as anticoagulant. Freshly obtained samples (PB, BM, CB) were subjected to flow cytometry analysis and/or isolation of mononuclear cells (MNC) using Ficoll. Isolated MNC were either used immediately or were frozen in liquid nitrogen until used. Frozen MNC and frozen CD34<sup>+</sup> MNC were thawed using DNase type I, 100 U/mL (Sigma Aldrich, St. Louis, MO, USA) to prevent cell clumping. CB cells were examined as freshly isolated leukocytes (after erythrocyte lysis) or as MNC after Ficoll-isolation and short-term (18 hours) culture. All cells were stored in a local biobank. Biobanking was approved by the ethics committee of the Medical University of Vienna.

### **Flow cytometry and cell sorting**

Phenotyping of CD34<sup>+</sup>/CD45<sup>+</sup>/CD38<sup>-</sup> SC and CD34<sup>+</sup>/CD45<sup>+</sup>/CD38<sup>+</sup> progenitor cells (in whole BM/PB/CB samples or MNC) was performed by multicolor flow cytometry as described<sup>1</sup> using combinations of fluorochrome-conjugated mAb shown in Table S1. Heparinized BM or PB cells (0.5-1.0 x 10<sup>6</sup> leukocytes per tube) were incubated with various combinations of mAb at room temperature (RT) for 15 minutes. Then, erythrocytes were lysed in FACS-Lysing Solution (BD Biosciences, San José, CA, USA). In a subset of patients, phenotyping was (also) performed on freeze-thawed MNC (BM or PB) derived from patients with CML (n=44) or AML (n=17). No major differences in cell surface marker expression were found when comparing freshly obtained cells with freeze-thawed cells of the same samples (not shown). Flow cytometry was performed on a FACSCalibur or FACSCanto II (BD Biosciences) or Cytoflex S (Beckman Coulter). In our samples, 80,000 to 150,000 cells (thawed MNC)

or 150,000 to 350,000 cells (fresh lysed cells) were acquired and expression of surface markers on CD34<sup>+</sup>/CD45<sup>+</sup>/CD38<sup>-</sup> stem cells (SC) and CD34<sup>+</sup>/CD45<sup>+</sup>/CD38<sup>+</sup> progenitor cells was determined by multi-color flow cytometry. The gating strategy is shown in Figure S1. Antibody-staining results were controlled by isotype-matched control mAb. For detection of biotinylated antibodies, cells were washed in phosphate-buffered saline (PBS) and stained with streptavidin-PE (BD Biosciences). Cells were then washed, and analyzed by flow cytometry using FlowJo software (TreeStar, Ashland, OR, USA) as reported.<sup>1,21</sup> Staining results were expressed as a) percentage of reactive cells and b) as ratio of median fluorescence intensities (MFI) obtained with specific mAb and control mAb (MFI mAb : MFI control mAb) as reported.<sup>1</sup> This MFI ratio (= staining index, SI) was determined to compare expression levels of markers on leukemic stem cells (LSC) and progenitors in various patients' groups. SI values were graded using the following score: -, 0-1.3; +/-, 1.31-3; +, 3.01-10; ++, >10.

In 6 normal BM samples, 5 cord blood (CB) samples, 21 AML samples and in 7 CML samples (chronic phase, n=4, accelerated phase, n=3), primary CD34<sup>+</sup>/CD38<sup>-</sup> cells and CD34<sup>+</sup>/CD38<sup>+</sup> progenitor cells were purified to homogeneity by cell sorting on a FACSARIA (Becton Dickinson) as described.<sup>1</sup> The purity of immature, sorted, CD34<sup>+</sup>/CD38<sup>-</sup> stem cells amounted to >95%. In a subset of patients (n=3), CML cells were pre-enriched as CD34<sup>+</sup> cells by magnetic cell sorting (MACS; Miltenyi Biotec, Bergisch Gladbach, Germany). In 6 patients with AML, cells were depleted from CD3<sup>+</sup> cells by MACS (Miltenyi Biotec).

Selection of markers and targets for further validation: markers were mainly selected based on their specificity for LSC (expressed on LSC but not on normal stem cells and preferably not on LSC in other forms of leukemia) and targets were expressed

primarily based on i) more or less specific expression on LSC, ii) stability of expression on LSC (on LSC in most patients and also at both, diagnosis and relapse) and iii) the availability of targeted drugs (antibody-type or small molecules).

To estimate numbers of surface molecules per cells, the quantibrite PE fluorescence quantitation kit (BD Biosciences) was applied. In brief, beads were resuspended in 500  $\mu$ l PBS containing 0.1% bovine serum albumin (Sigma Aldrich) and acquired on a FACSCanto II. Using an appropriate isotype-matched mAb, the SI was calculated for the four beads-populations laden with different amounts of PE molecules in the same way as for leukemic cells. Staining intensities obtained with beads were then correlated with expression levels of surface molecules (in SI) obtained in our staining experiments with LSC. To estimate the numbers of PE-molecules per cell (antibody molecules bound to the cell surface) a PE-molecule to antibody ratio of 1:1 was assumed. The limit of detection was 100 sites per cell corresponding to an SI of 1.6.

### **Incubation of cells with cytokines and targeted drugs and evaluation of proliferation, apoptosis and cell surface marker expression**

In a subset of patients, unfractionated MNC or purified stem- and progenitor cells were incubated with recombinant human (rh) cytokines, including granulocyte colony-stimulating factor (G-CSF, 100 ng/ml), stem cell factor (SCF, 100 ng/ml), interleukin-3 (IL-3, 100 ng/ml) or a cocktail of cytokines (G-CSF+SCF+IL-3; each 100 ng/ml). In select experiments, cells were incubated with the ROBO4 ligand rh SLIT2 (100 ng/ml), IL-2 (100-2,000 ng/ml) or EPO (10 U/ml). In another set of experiments, cells were incubated in the absence or presence of targeted drugs: the IL-2R-targeted drug denileukin-diftitox (KU812 cells: 0.01-10  $\mu$ g/ml; primary CML cells: 10-100  $\mu$ g/ml),

the CD33-targeted antibody-conjugate gemtuzumab/ozogamicin (GO, 0.01-5  $\mu\text{g/ml}$ ), the multi-targeting FLT3/KIT drug midostaurin (0.01-5  $\mu\text{M}$ ), the FLT3-targeting drug gilteritinib (0.1-1  $\mu\text{M}$ ) or the CD52-targeted drug alemtuzumab (100-500  $\mu\text{g/ml}$ ). After 48 hours, cells were examined for uptake of  $^3\text{H}$ -thymidine (purified LSC), or the expression of surface markers (CD26 on LSC), or the percentage of apoptotic cells (LSC and KU812) by flow cytometry as published previously.<sup>1,5</sup> Drug effects on apoptosis in LSC were examined by combined staining for surface markers (gating for CD34<sup>+</sup>/CD38<sup>-</sup> and CD34<sup>+</sup>/CD38<sup>+</sup> cells) and AnnexinV (eBioscience, San Diego, CA, USA). 4',6-diamidino-2-phenylindole (DAPI, 0.4  $\mu\text{g/ml}$ ) (Sigma Aldrich) was used to exclude non-viable cells. Effects of GO and alemtuzumab on absolute numbers of viable LSC were examined using CountBright absolute counting beads (Invitrogen, Carlsbad, CA, USA) essentially as described.<sup>22</sup> For all *in vitro* experiments, cells were incubated in RPMI 1640 medium plus 10% FCS, penicillin/streptomycin and amphotericin B (each 1%). In drug incubation experiments with alemtuzumab, RPMI 1640 medium was supplemented with 30% complement-containing human serum. Effects of denileukin-diftitox on KU812 cells transduced with a random shRNA and KU812 cells transduced with shRNA against CD25 were analyzed after 48 hours of drug incubation by caspase-3 (BD Biosciences) staining and flow cytometry.<sup>5</sup>

### **Xenotransplantation model**

NOD.Cg-*Prkdc*<sup>scid</sup> *Il2rg*<sup>tm1Wjl</sup>/SzJ mice (NSG mice) were purchased from Jackson Laboratory (Bar Harbor, ME, USA). NSG mice were kept under stringent aseptic (sterile) conditions. Twenty-four hours prior to injection, mice were irradiated in flat (sterile) irradiation-cages (2.4 Gy). In typical experiments, T cell-depleted AML cells



or sorted CD34<sup>+</sup> CML cells (all samples obtained at diagnosis) were injected into adult NSG mice (5 mice per group). Prior to injection, cells were incubated in control medium (RPMI 1640 medium plus 10% FCS plus 30% human serum plus solvent control), GO (5 µg/ml), alemtuzumab (500 µg/ml), or a combination of GO+alemtuzumab, for 1 hour at 37°C. Then, cells were resuspended in RPMI medium with 10% FCS and injected into the lateral tail vein of adult female NSG mice (1.5-15x10<sup>6</sup> AML cells, 0.5-1.0x10<sup>6</sup> CD34<sup>+</sup> CML cells). After injection, mice were inspected daily and sacrificed as soon as they developed disease-symptoms or after a maximum observation period of 15 weeks (AML) or 27 weeks (CML). Then, mice were sacrificed, and the long bones (humeri, tibiae, and femura) were flushed to recover BM cells for flow cytometry essentially as described.<sup>1</sup> Multicolor flow cytometry was performed using mAb against human CD19, CD33, and CD45. TO-PRO-3 (Invitrogen) was used to exclude non-viable cells. Engraftment was defined as a population of at least 0.01% human CD45<sup>+</sup> cells in flushed mouse BM samples. Animal studies were approved by the ethics committee of the University of Veterinary Medicine Vienna (Austria), and were carried out in accordance with guidelines for animal care and protection and protocols for experimental animal housing and studies approved by Austrian law (BMWFV-68.205/0050-WF/V/3b/2015).

### **Gene array studies**

To define mRNA expression patterns in CD34<sup>+</sup> cell subsets in AML, CML and normal BM samples, sorted cells (CD34<sup>+</sup>/CD38<sup>-</sup> and CD34<sup>+</sup>/CD38<sup>+</sup>) were subjected to gene array analysis. Total RNA was extracted from sorted cells using RNeasy kit (Qiagen, Hilden, Germany). Total RNA (100 ng) was then used for GeneChip analyses.

Preparation of terminal-labeled cRNA, hybridization to genome-wide human PrimeView GeneChips (Affymetrix, Santa Clara, CA, USA) and scanning of the arrays were carried out according to manufacturer's protocols (<https://www.affymetrix.com>). Robust Multichip Average (RMA) signal extraction and normalization were performed as described (<http://www.bioconductor.org/>).<sup>23,24</sup> Changes in mRNA expression levels were calculated as mRNA ratio of CD34<sup>+</sup>/CD38<sup>-</sup> cells when comparing normal BM hematopoietic stem cells (HSC) with LSC (AML or CML). To calculate differential gene expression between individual sample groups, we performed a statistical comparison using the LIMMA package as described previously.<sup>25</sup> Briefly, LIMMA estimates the 'fold-change' between predefined sample groups by fitting a linear model and using an empirical Bayes method to define the standard errors of the estimated log-fold changes for each probe set.<sup>26</sup>

Potential SC markers were reviewed and grouped into non-clustered and clustered surface antigens. In a next step, most upregulated surface antigens that have a defined SC-related function or are known as potential targets were selected. These antigens were re-examined in purified LSC and normal stem cells by qPCR and surface phenotyping. The top-upregulated surface antigens (mRNA) in AML LSC and CML LSC compared to normal BM stem cells are shown in Table S13B. The top-upregulated surface antigens in CML LSC compared to more mature CML progenitors are shown in Table S18. A heat map of regulated genes in AML and CML LSC is depicted in Figure 2 in the main text of the manuscript and in Figure S3. A complete list of all expressed mRNA species is available at Gene Expression Omnibus:

<https://www.ncbi.nlm.nih.gov/geo/query/acc.cgi?acc=GSE138883&token=glmjuauafpqbxi>

### **Quantitative PCR (qPCR)**

To confirm marker expression at the mRNA level, qPCR was performed using primers specific for markers and target antigens and control-antigens (huABL). Experiments were performed on mRNA derived from sorted CD34<sup>+</sup>/CD38<sup>-</sup> and CD34<sup>+</sup>/CD38<sup>+</sup> cells (AML, n=14; CML, n=4; cord blood, n = 4; normal BM, n=3). Total RNA was extracted using the RNeasy Micro Kit (Qiagen). cDNA was synthesized using Moloney murine leukemia virus reverse transcriptase (Invitrogen), random primers, dNTPs (2 mM) (both from Invitrogen), and Rnasin (Promega, Madison, WIS, USA) according to the manufacturer's instructions. PCR was performed using primers (Eurofins, Ebersberg, Germany) shown in Table S6. mRNA levels were quantified on a 7900HT Fast Real-Time PCR System or Quantstudio 3 (both from Applied Biosystem, Foster City, CA, USA) using iTaq SYBR Green Supermix with ROX (Bio-Rad, Hercules, CA, USA), as described.<sup>27</sup> PCR conditions were: hold stage: 2 minutes at 50°C, 2 minutes at 95°C (denaturation); PCR stage: 15 seconds at 95°C, 1 minute annealing and extension at 60°C (40x cycles); melt curve stage: 15 seconds at 95°C, 15 seconds at 60°C, 15 seconds at 95°C. ABL served as a reference gene. Results are expressed as  $\Delta Ct$  values (=  $Ct_{ABL} - Ct_{GENE}$ ). Samples with undetectable mRNA expression were set to a maximum Ct value of 38.

For the quantification of BCR/ABL1 transcript levels in patient-derived cells (routine PB or BM samples in the follow-up), we performed a qPCR using the BCR/ABL1 Mbc FusionQuant® Mega Kit (Ipsogen, Marseille, France) and the LightCycler® 2.0-System (Roche, Mannheim, Germany). BCR/ABL1 levels were calculated and expressed according to the international scale (IS).<sup>28-30</sup>

### **Conventional cytogenetic studies and fluorescence in situ hybridization (FISH)**

Conventional cytogenetics was performed in all patients with CML and AML at diagnosis. In patients with CML, cytogenetics was also performed routinely during follow-up at defined time-intervals, namely in 3 month-intervals during the first year; and after the first year in 3-12 month-intervals. In addition, cytogenetics (and FISH if necessary) was performed in all patients with (suspected) relapse. In most samples, at least 20 metaphases were examined in each sample. In case of questionable results or poor growth, FISH analysis was performed. Karyotypes were reported according to available guidelines.<sup>31</sup> In patients with CML, results were expressed as percent Ph-chromosome-positive metaphases (of all metaphases examined). In order to confirm the clonal origin of sorted stem cells (CD34<sup>+</sup>/CD38<sup>-</sup> cells), FISH was performed on cytopsin slides using probes specific for genes located on chromosome 3 or chromosome 16, the long arm of chromosome 5, and AML1 and ETO (RUNX1 and RUNX1T1) (Kreatech, Amsterdam, Netherlands). A detailed description of probes is shown in Table S7. Results obtained by conventional karyotyping in patients' cells at diagnosis are summarized in Tables S2-S5, and a summary of FISH results obtained with purified (sorted) stem cells is shown in Table S8.

### **Statistical evaluations**

Differences in marker expression or the percentage of LSC in various sample-series were determined by appropriate statistical tests. For comparing surface marker expression on normal versus leukemic (CD34<sup>+</sup>/CD38<sup>-</sup>) stem cells and between subsets of patients (defined by molecular abnormalities such as *FLT3* ITD or cytogenetic

markers), the Kruskal-Wallis test was applied. Statistical post-hoc analyses were performed to confirm significance levels using pair-wise Wilcoxon rank-sum test. Results were adjusted for multiple testing using the Benjamini-Hochberg correction.<sup>32</sup> All statistical analyses were conducted by using R version 3.6.1 (Vienna, Austria).<sup>33</sup> Results were considered significant when the p value was below 0.05.

For determining the level of significance in drug inhibition experiments or differences in engraftment levels of LSC in NSG mice, the Student's t test was applied. Results were considered significantly different when p was <0.05.

The probability of overall survival (OS) in subsets of patients (AML, CML) defined by marker expression on LSC was calculated by the product limit method of Kaplan and Meier. The patients were split into two groups per marker based on sample size and subpopulation formation. Statistical significance in differences among patient subgroups (defined by divergent surface marker expression on LSC) concerning survival were determined by log rank test.<sup>22</sup>

## Supplemental Material – Figures

Figure S1

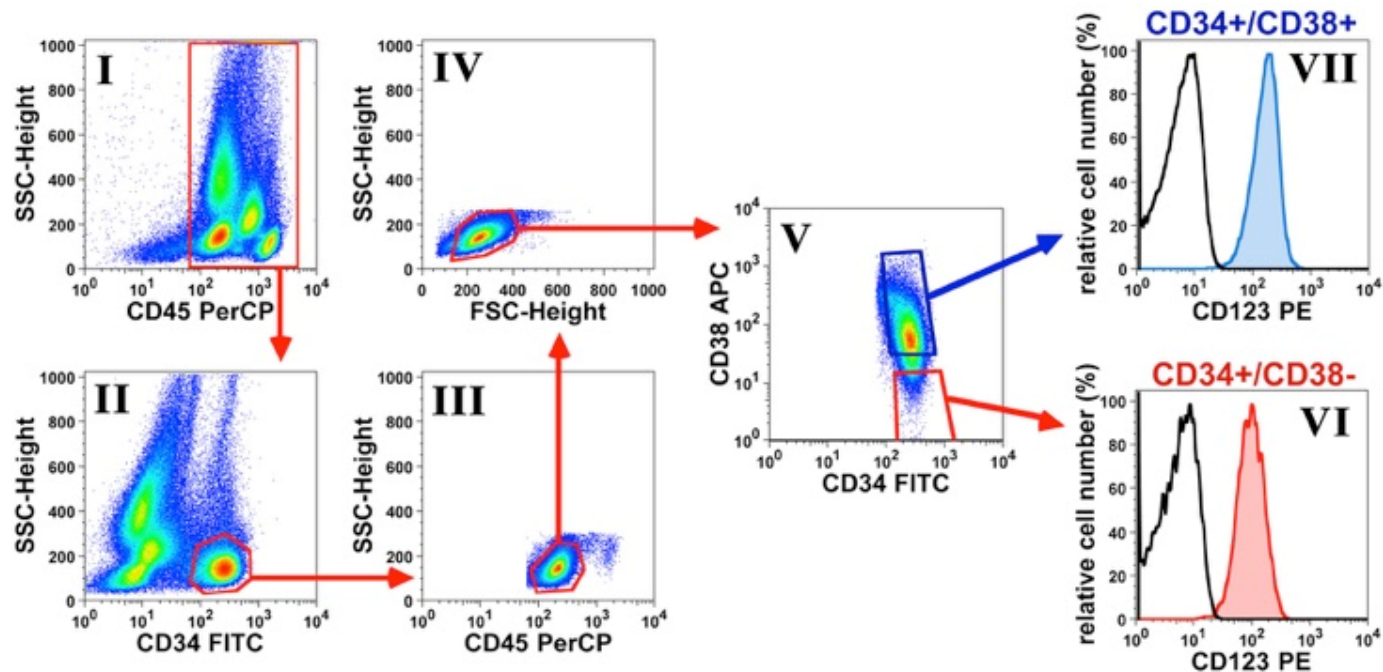

### Flow cytometry and gating strategy to define and separate stem- and progenitor cells

In order to define and analyze immature CD34<sup>+</sup>/CD38<sup>-</sup> stem cells and CD34<sup>+</sup>/CD38<sup>+</sup> progenitor cells, a sequential gating algorithm (I-VII) was applied using FlowJo software. First, CD45<sup>+</sup> cells (I) were gated to exclude erythrocytes and stroma cells, followed by gating of CD34<sup>+</sup> stem and progenitor cells (II) and further selection of CD45 dim-positive cells (III). In a next step, dead cells and cell debris was excluded by forward and side-scatter properties (IV). Finally, CD34<sup>+</sup>/CD38<sup>-</sup> stem cells and CD34<sup>+</sup>/CD38<sup>+</sup> progenitor cells were analyzed separately for expression of surface markers and targets (V; CD34<sup>+</sup>/CD38<sup>+</sup>: blue gate; CD34<sup>+</sup>/CD38<sup>-</sup>: red gate) (VI/VII). The figure shows expression of CD123 on CD34<sup>+</sup>/CD38<sup>-</sup> stem cells (lower panel, red histogram) and CD34<sup>+</sup>/CD38<sup>+</sup> progenitor cells (upper panel, blue histogram) in a patient with AML. Antibody reactivity was controlled by isotype-matched antibodies (black open histogram).

Figure S2

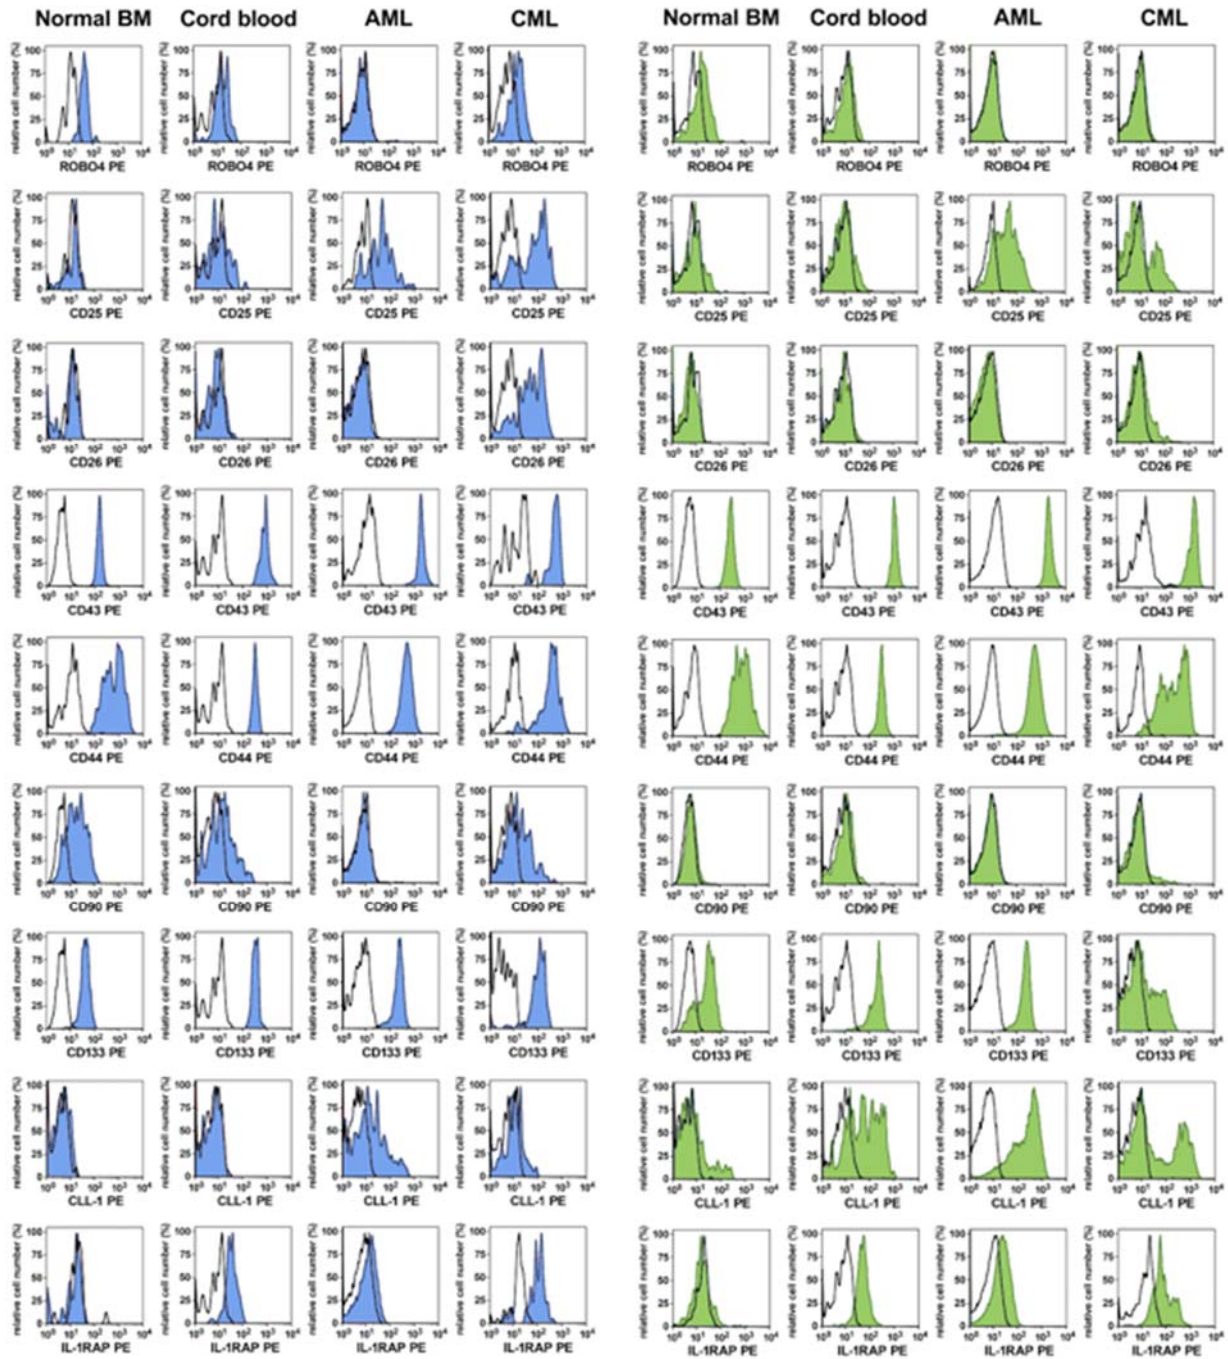

**Examples for staining reactions on stem and progenitor cells from normal BM, cord blood and patients with AML and CML**

Cells were stained with antibodies against ROBO4, CD25, CD26, CD43, CD44, CD90, CD133, CLL-1 and IL-1RAP. Antibody reactivity with test antibodies is shown in colored histograms (CD34<sup>+</sup>/CD38<sup>-</sup> stem cells in blue and CD34<sup>+</sup>/CD38<sup>+</sup> cells in green histograms) and the isotype-matched control antibody in black open histograms. Abbreviations: AML, acute myeloid leukemia; BM, bone marrow; CD; cluster of differentiation; CML, chronic myeloid leukemia; IL-1RAP, interleukin-1 receptor accessory protein; ROBO4, roundabout 4.

Figure S3A

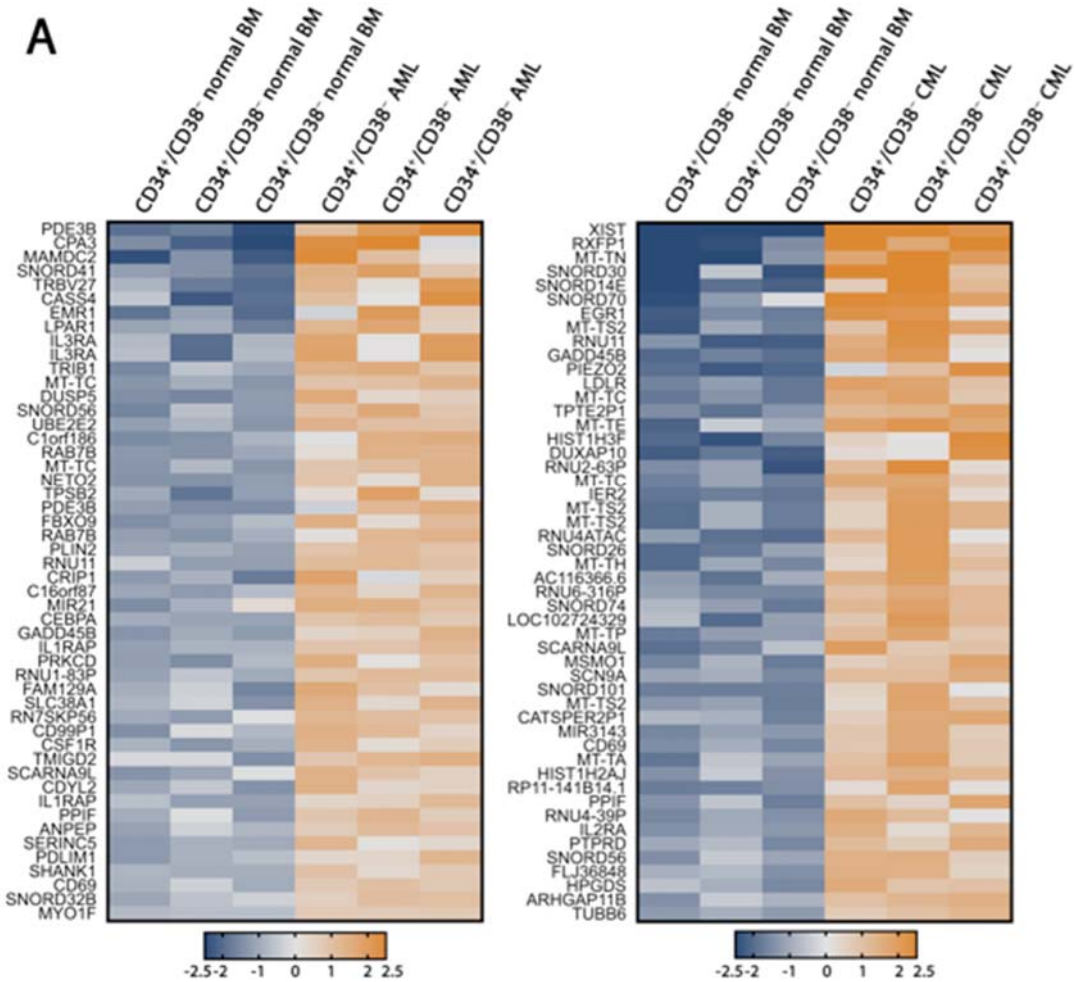

**Gene chip analysis in CD34<sup>+</sup>/CD38<sup>-</sup> cells in normal BM, AML and CML**

Microarray analyses were performed on RNA of highly purified (sorted) CD34<sup>+</sup>/CD38<sup>-</sup> AML and CML LSC as described in the supplement. The heatmaps show the 50 most upregulated genes in CD34<sup>+</sup>/CD38<sup>-</sup> cells in 3 patients with AML (right columns of left subpanel; patients #102, #173, #210) and 3 with CML (right columns of right subpanel; patients #8, #11, #21) (all leukemic samples were obtained at diagnosis). The definition of the color-scoring is indicated in the figures. The 3 left columns of each subpanel show the same genes in normal CD34<sup>+</sup>/CD38<sup>-</sup> BM stem cells. Patients' numbers (#) refer to the patients' numbers defined in Table S2 and S3. Abbreviations: AML, acute myeloid leukemia; CML, chronic myeloid leukemia; #, number; LSC, leukemic stem cell; BM, bone marrow.



**Figure S3B**

Gene chip analysis of CD markers in CD34<sup>+</sup>/CD38<sup>-</sup> cells in normal BM, AML and CML

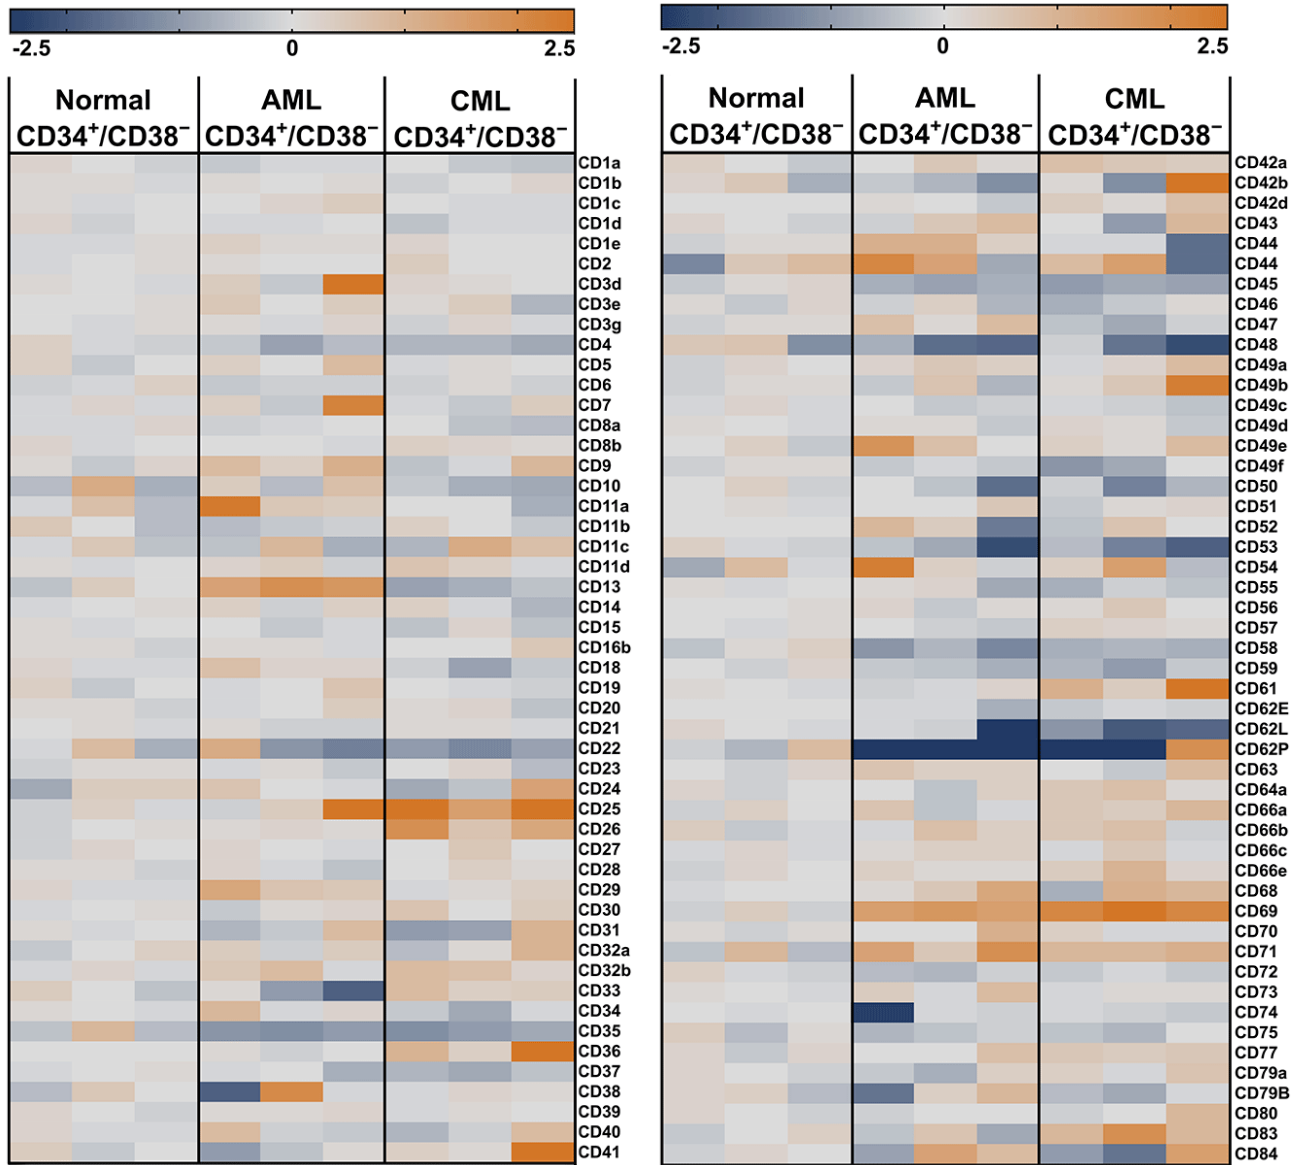

Figure S3B continued

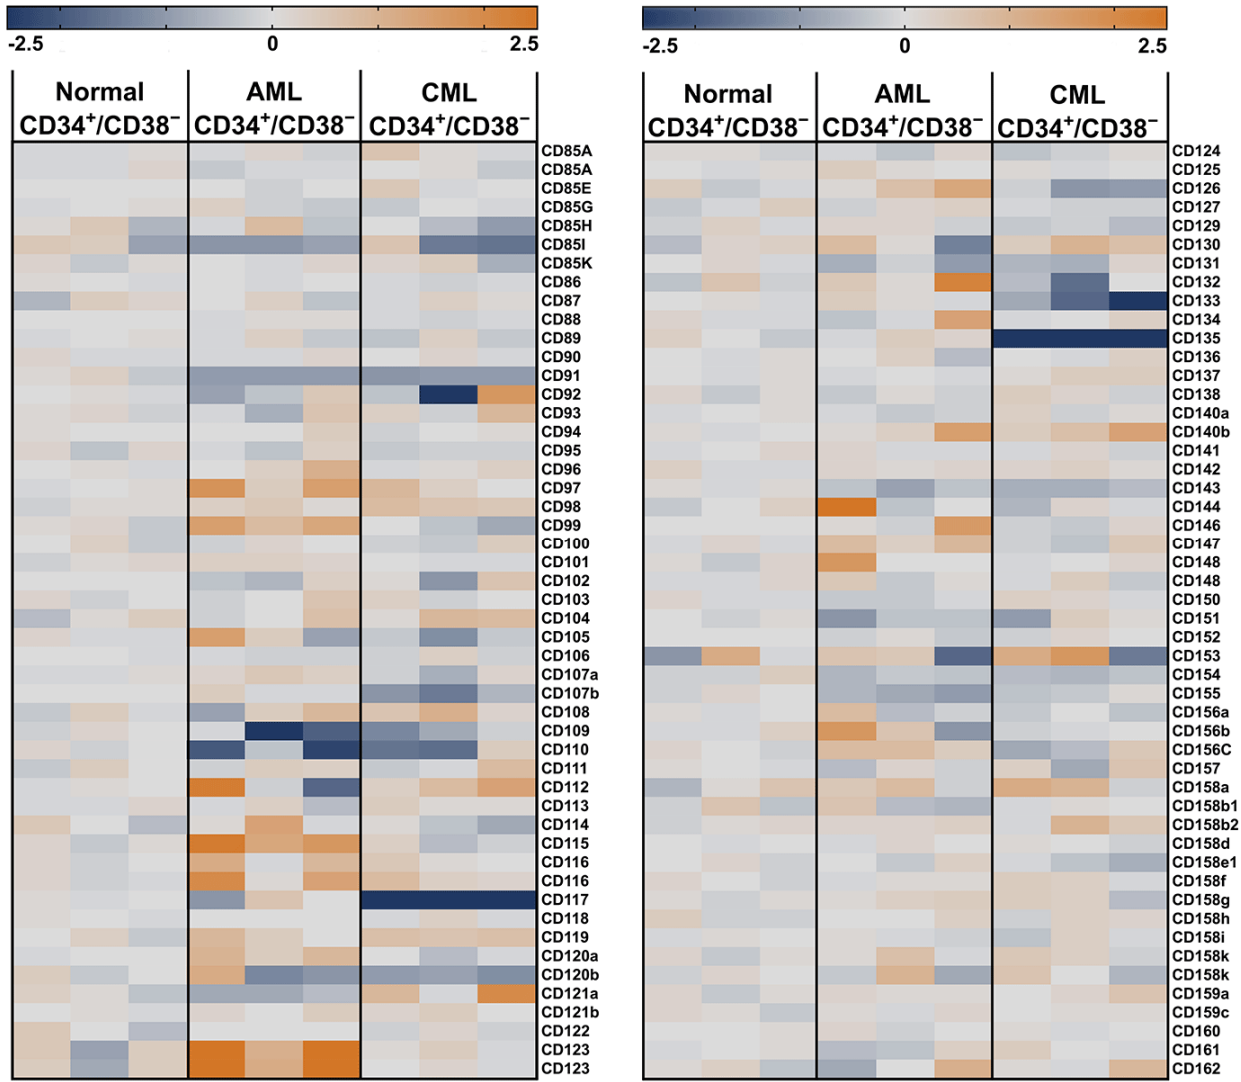

Figure S3B continued

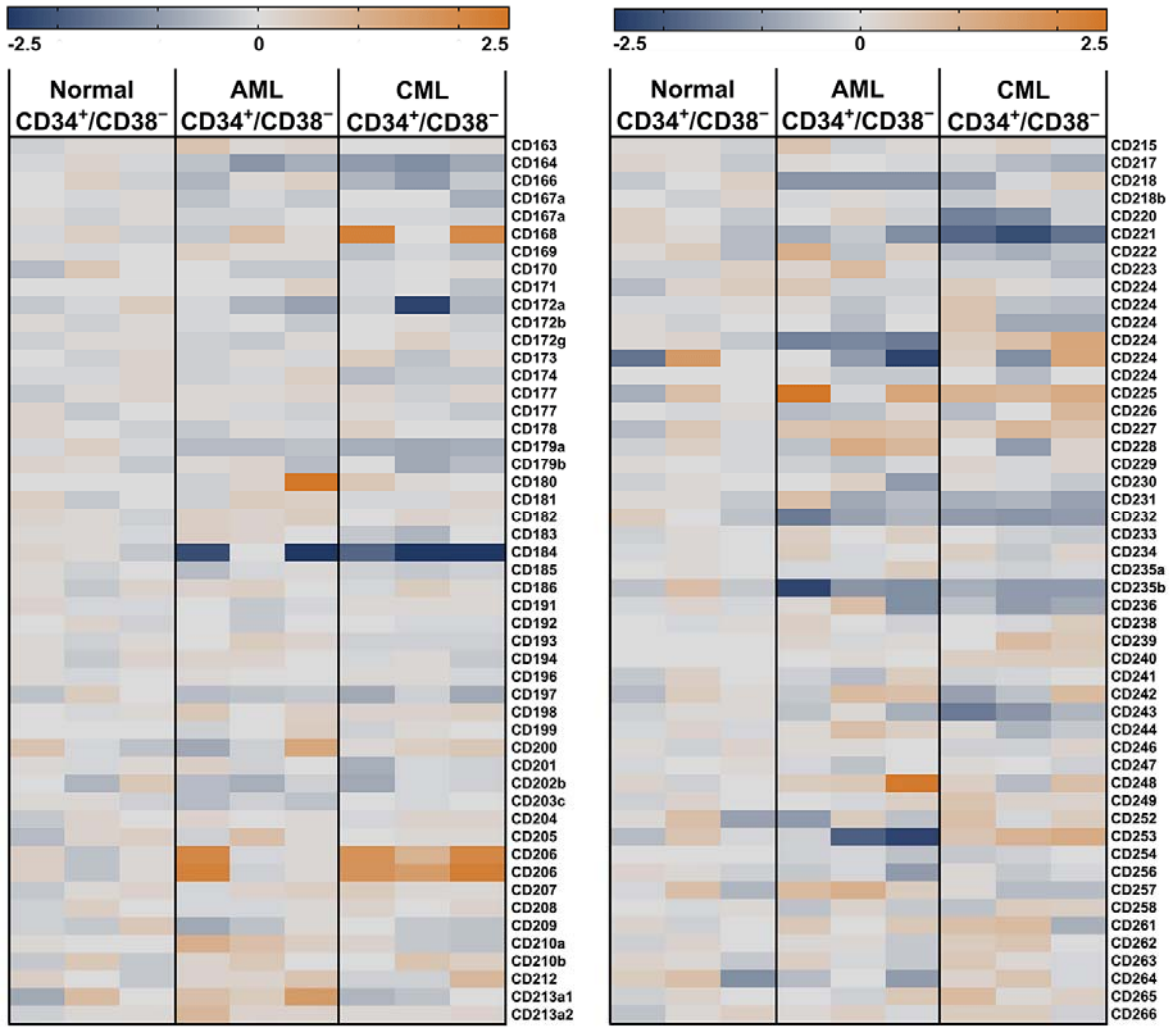

Figure S3B continued

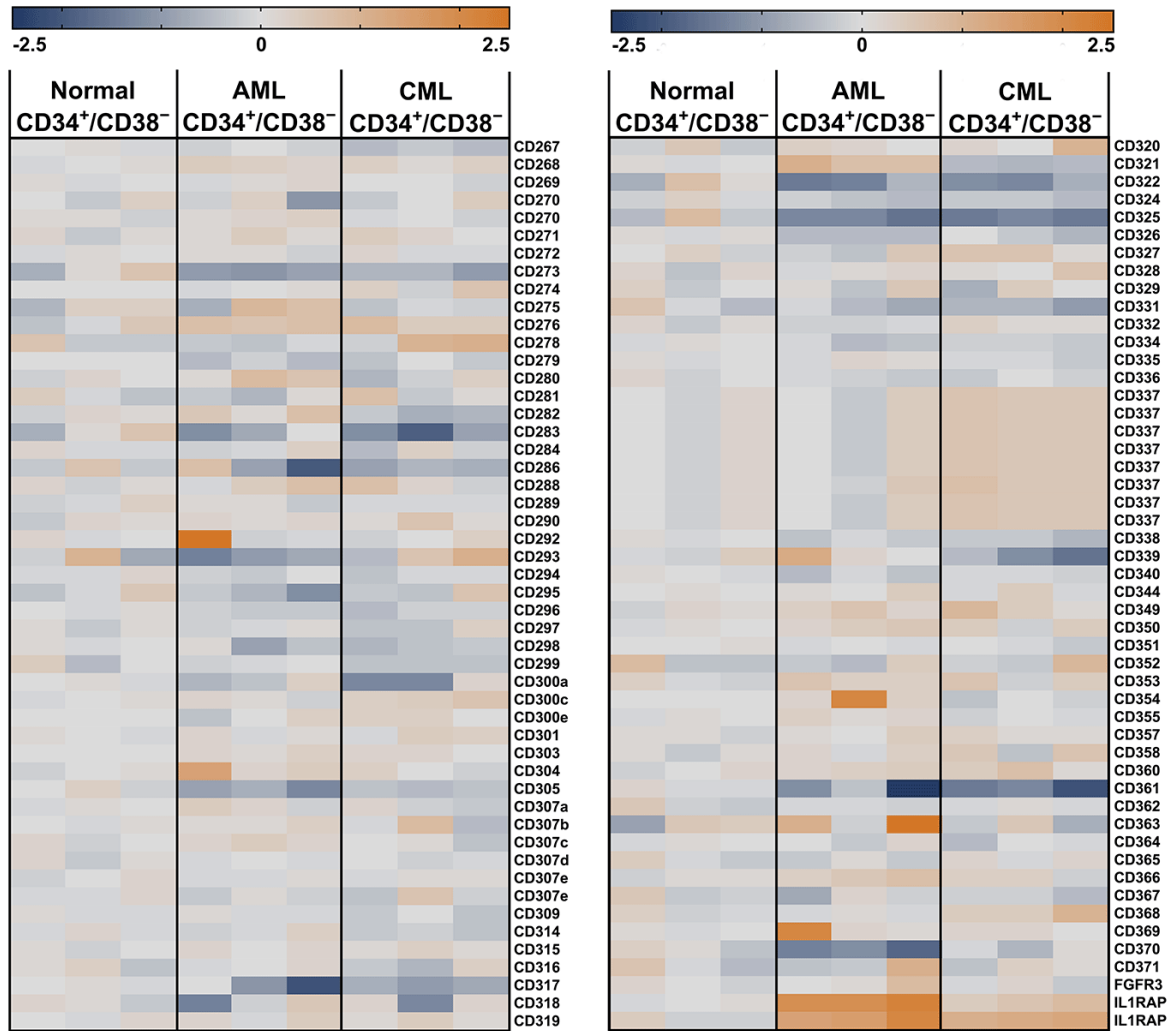

**Gene chip analysis of CD markers in CD34<sup>+</sup>/CD38<sup>-</sup> cells in normal BM, AML and CML**

Gene array data of sorted CD34<sup>+</sup>/CD38<sup>-</sup> stem cells (SC) obtained from control bone marrow (BM) (n=3; left columns) and patients with AML (n=3; patients #102, #173, #210; middle columns) and CML (n=3; patients #8, #11, #21; right columns) (leukemic samples were obtained at diagnosis). Gene array analyses were performed as described in the supplement. mRNA expression levels were normalized to the mean expression of the control samples and are shown as heatmap. The definition of the color-scoring is indicated in the figures. Patients' numbers (#) refer to the patients' numbers defined in Table S2 and S3. Abbreviations: AML, acute myeloid leukemia; CD; cluster of differentiation; CML, chronic myeloid leukemia; IL-1RAP, interleukin-1 receptor accessory protein; FGFR3, fibroblast growth factor receptor 3.

**Figure S3C**

Gene chip analysis of CD markers in CD34<sup>+</sup>/CD38<sup>+</sup> cells in normal BM, AML and CML

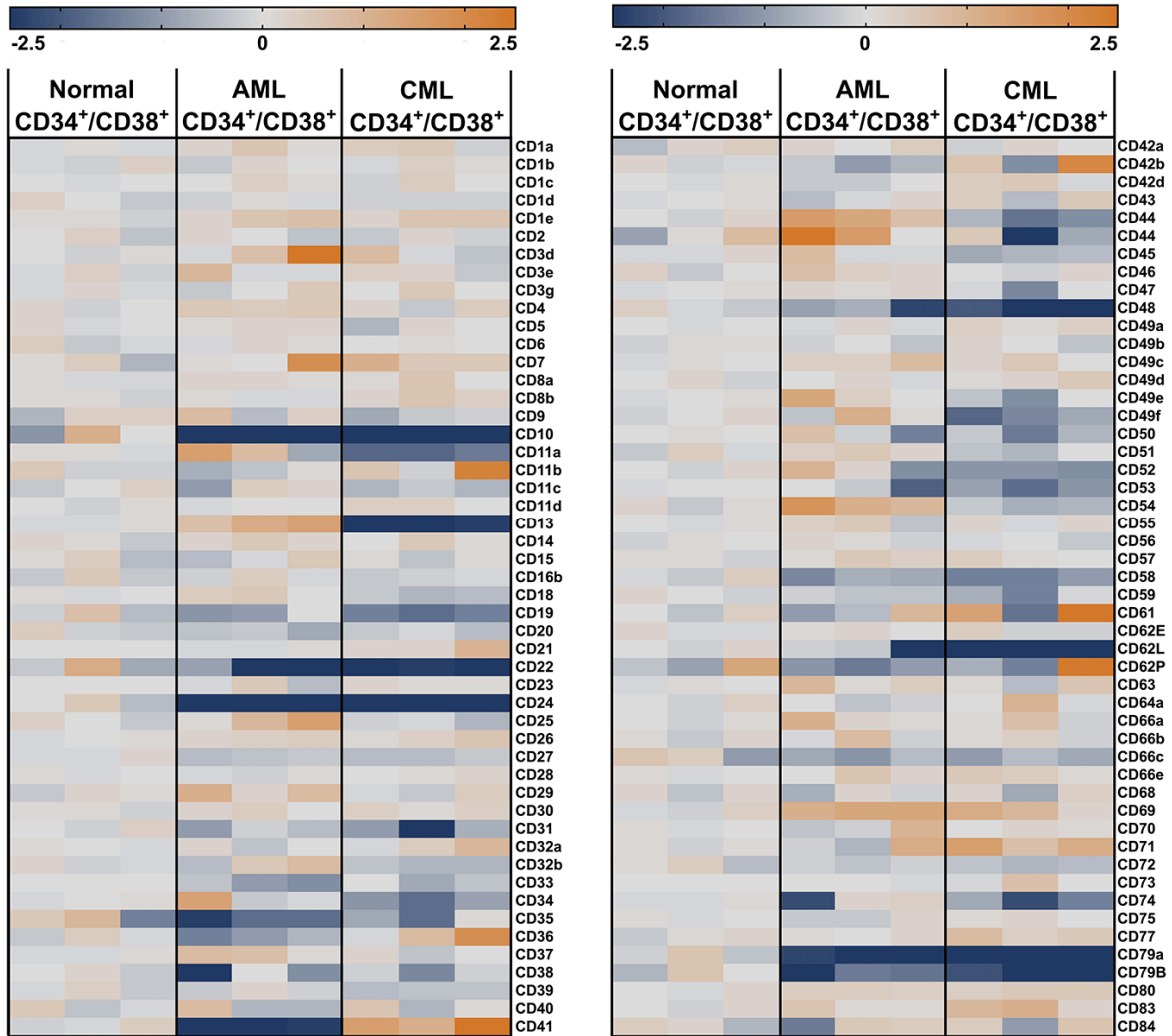

Figure S3C continued

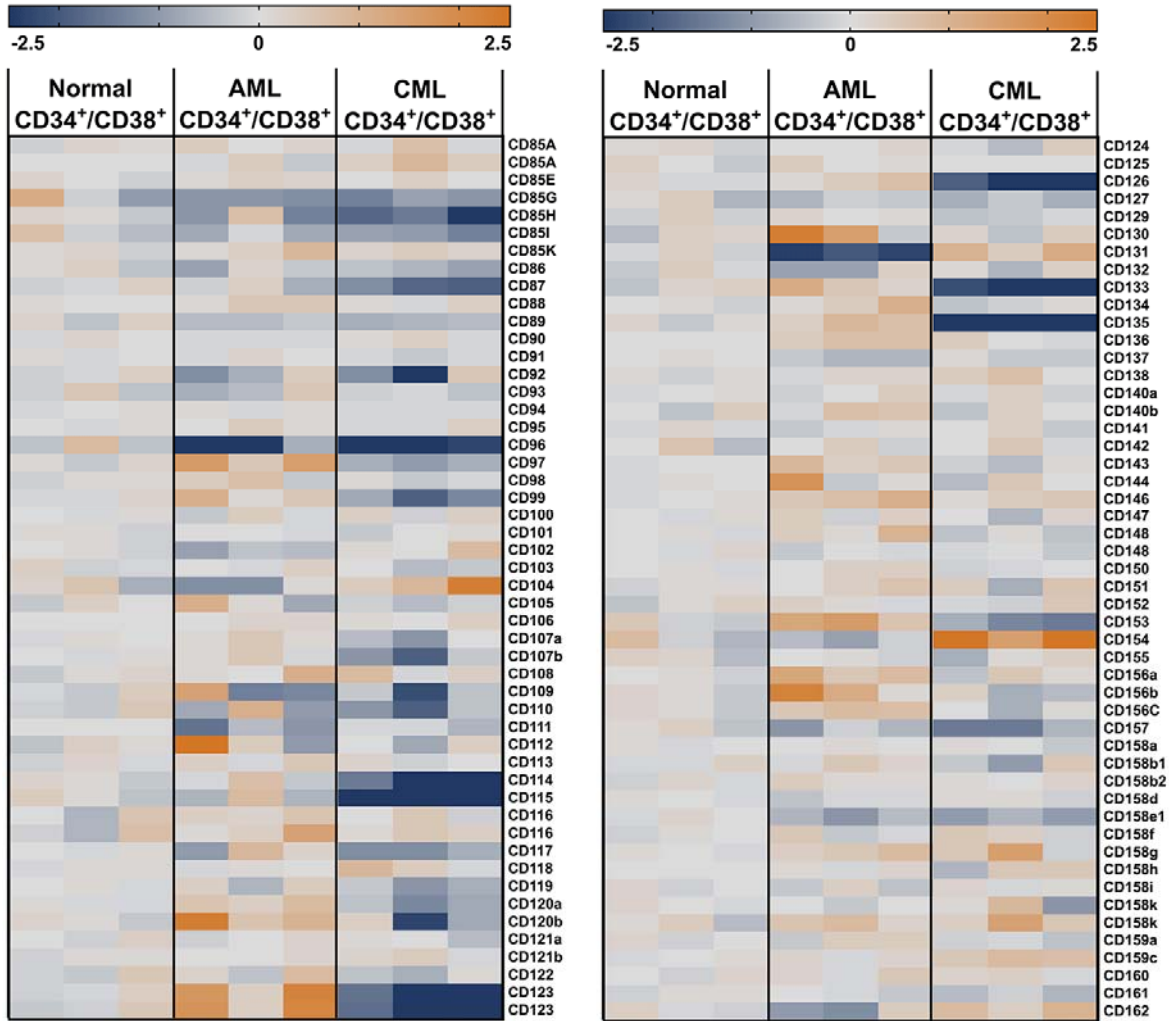

Figure S3C continued

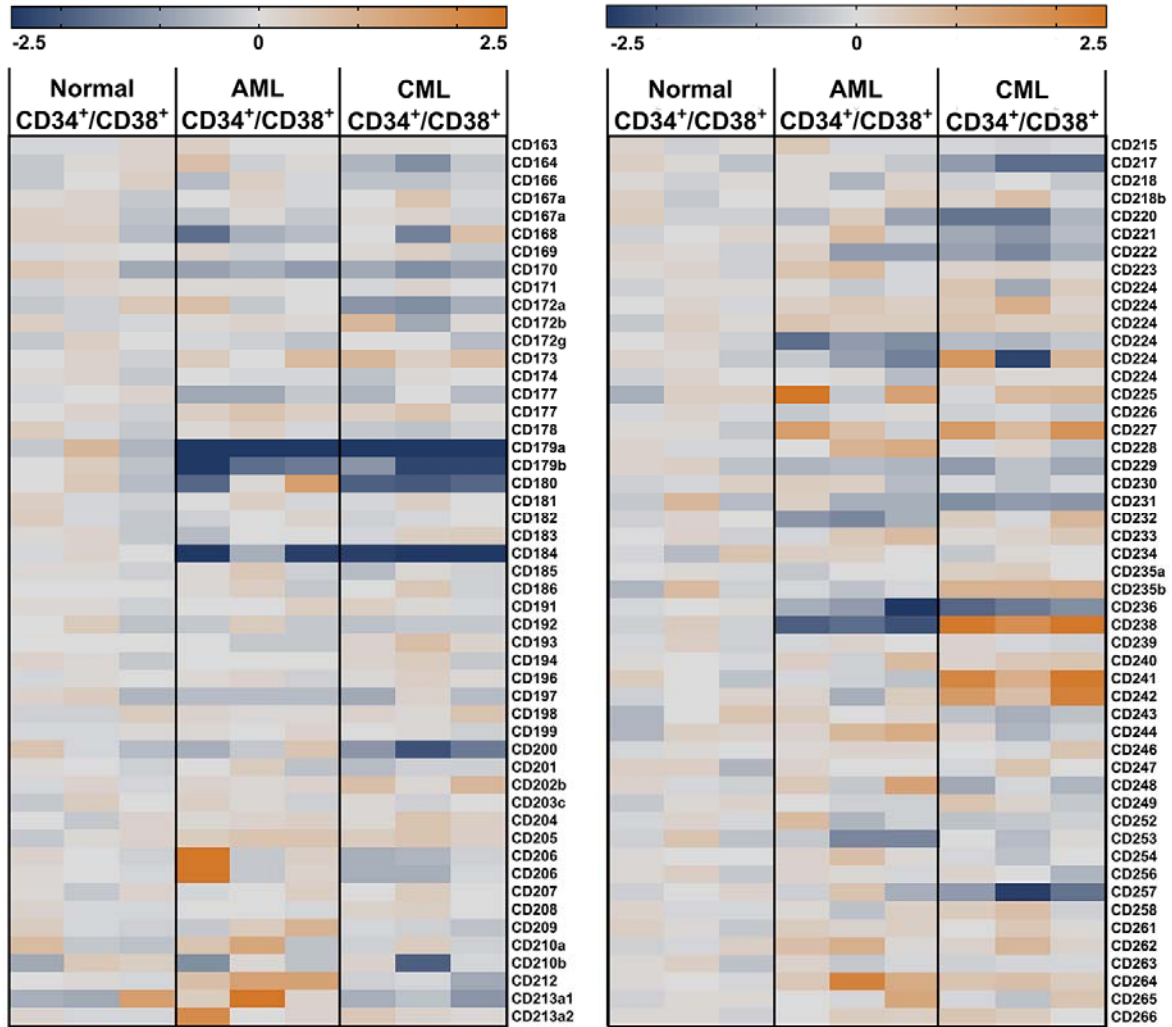

Figure S3C continued

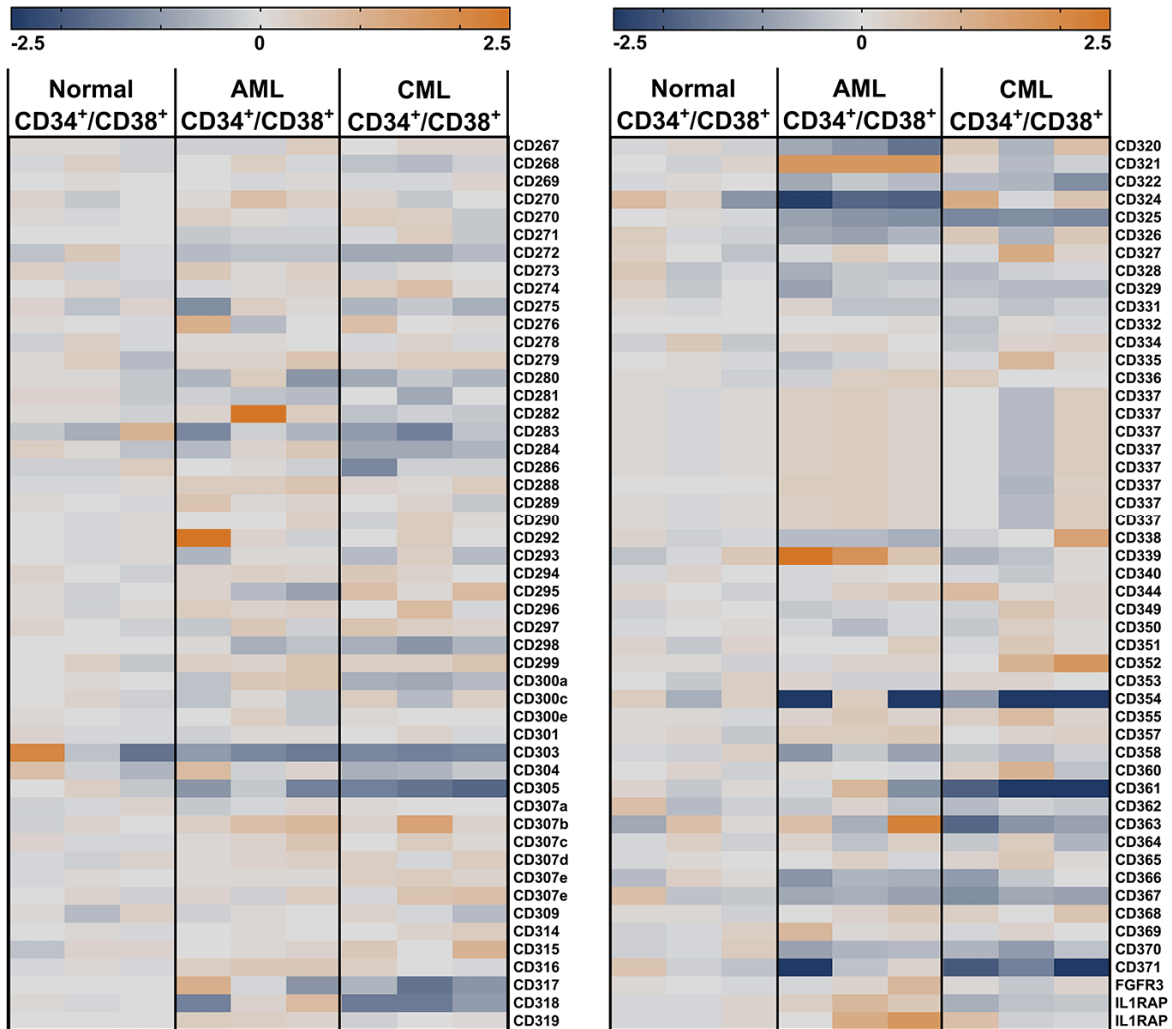

**Gene chip analysis of CD markers in CD34<sup>+</sup>/CD38<sup>+</sup> cells in normal BM, AML and CML**

Gene array data of sorted CD34<sup>+</sup>/CD38<sup>+</sup> progenitor cells obtained from control bone marrow (BM) (n=3; left columns) and patients with AML (n=3; patients #102, #173, #210; middle columns) and CML (n=3; patients #8, #11, #21; right columns) (leukemic samples were obtained at diagnosis). Gene array analyses were performed as described in the supplement. mRNA expression levels were normalized to the mean expression of the control samples and are shown as heatmap. The definition of the color-scoring is indicated in the figures. Patients' numbers (#) refer to the patients' numbers defined in Table S2 and S3. Abbreviations: AML, acute myeloid leukemia; CD; cluster of differentiation; CML, chronic myeloid leukemia; IL-1RAP, interleukin-1 receptor accessory protein; FGFR3, fibroblast growth factor receptor 3.



Figure S4

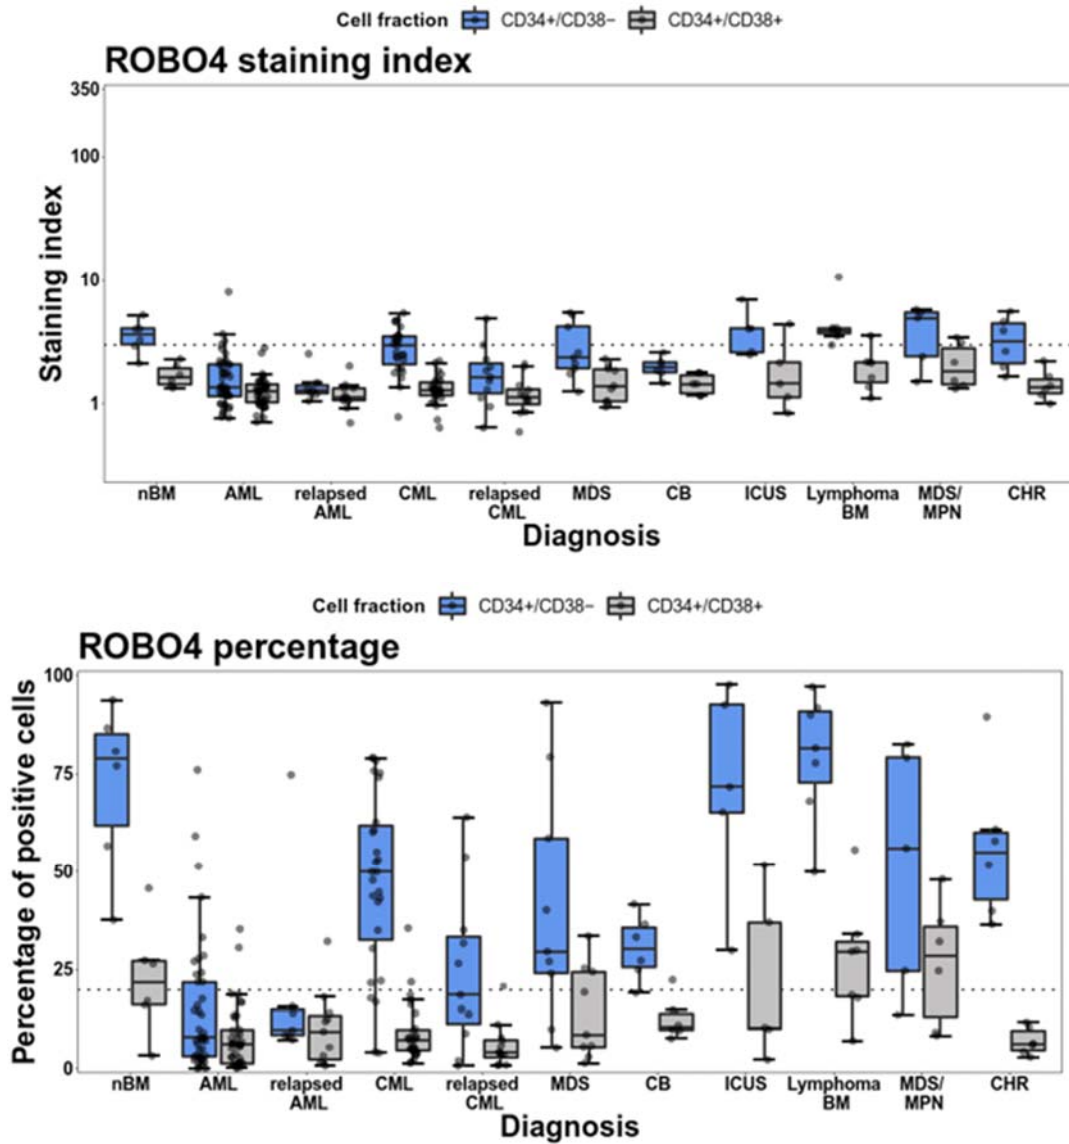

**Expression of ROBO4 on leukemic and normal hematopoietic stem cells**

The expression of ROBO4 on CD34<sup>+</sup>/CD38<sup>-</sup> stem cells (blue boxes) and CD34<sup>+</sup>/CD38<sup>+</sup> progenitor cells (grey boxes) in normal bone marrow, patients with CML, MDS, AML and other disease categories as indicated is shown. Samples were examined by multi-color flow cytometry using an antibody against ROBO4. The figure shows the staining ratio compared to an unspecific isotype control antibody (staining index, upper panel) and the percentage of reactive cells in each sample (lower panel). The dotted line represents clear expression (staining index is higher than 3 or more than 20% positive cells). The range of each box represents the 25<sup>th</sup> (lower box margin) to 75<sup>th</sup> (upper box margin) percentile. The middle lines inside the boxes represent the median expression level. Abbreviations: BM, bone marrow; n, normal; CML, chronic myeloid leukemia; AML, acute myeloid leukemia; MDS, myelodysplastic syndrome; MPN, myeloproliferative neoplasm; CB, cord blood; ICUS, idiopathic cytopenia of undetermined significance; CHR, AML and/or CML in complete hematologic remission; ROBO4, roundabout 4.

Figure S5

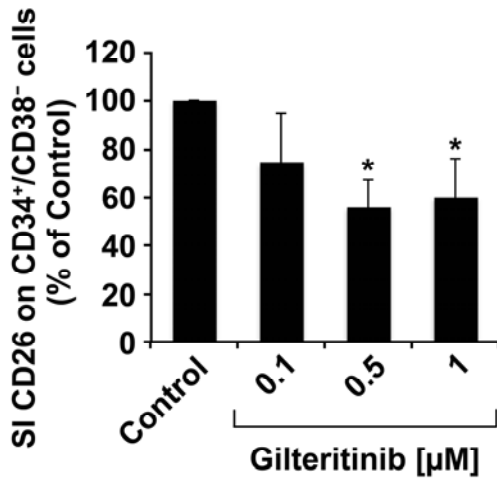

**Expression of CD26 on CD34<sup>+</sup>/CD38<sup>-</sup> AML stem cells from *FLT3* ITD<sup>+</sup> patients after incubation with the *FLT3* inhibitor gilteritinib**

Mononuclear cells from 3 patients with AML (samples obtained at diagnosis) were incubated in medium (Control) or gilteritinib (0.1-1  $\mu\text{M}$ ) for 24 hours at 37°C. Thereafter, CD26 expression was analyzed on CD34<sup>+</sup>/CD38<sup>-</sup> cells using multi-color flow cytometry. Results are expressed as staining index (median fluorescence intensity of CD26 divided through matched isotype control) and are presented as % of control and show the mean $\pm$ S.D. from 3 experiments. Asterisk (\*): p<0.05 compared to control. Abbreviations: SI, staining index; AML, acute myeloid leukemia.

Figure S6

A

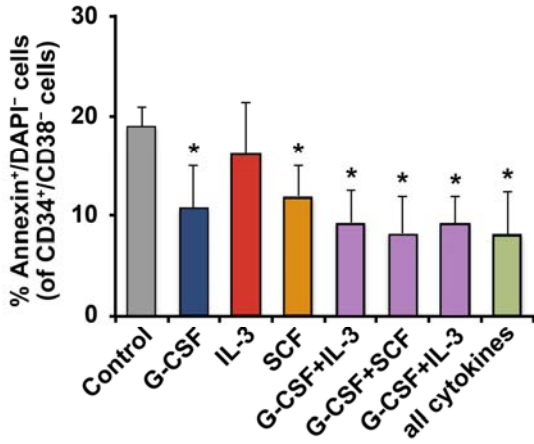

| patient # | sample at | Staining-index score |               |                 |
|-----------|-----------|----------------------|---------------|-----------------|
|           |           | CD114<br>G-CSFR      | CD117<br>SCFR | CD123<br>IL-3RA |
| 210       | D         | +/-                  | ++            | +               |
| 1         | D         | +                    | ++            | ++              |
| 183       | D         | +                    | ++            | ++              |
| 141       | D         | +/-                  | ++            | ++              |

B

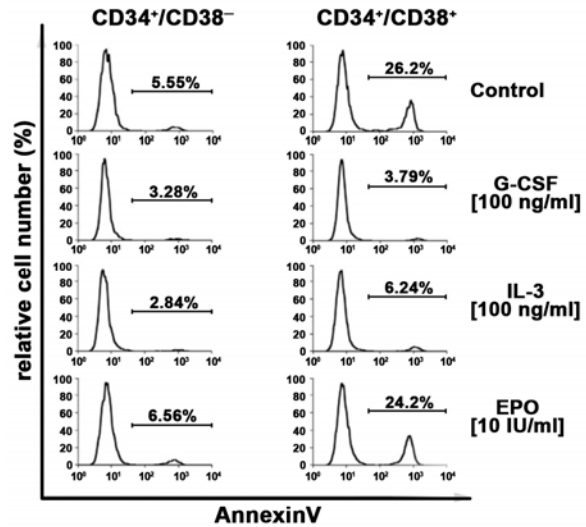

### Effects of various cytokines on viability of CD34<sup>+</sup>/CD38<sup>-</sup> AML LSC

(A) Mononuclear cells from 4 patients with AML (samples obtained at diagnosis) were incubated separately in RPMI 1640 medium and 10% FCS in the absence (control, grey bar) or presence of G-CSF (blue bar), IL-3 (red bar), SCF (yellow bar), or a combination of these cytokines (violet bars for double combinations and green bar for the combination of all cytokines) as indicated (each 100 ng/ml) at 37°C for 48 hours. Thereafter, cells were examined for apoptosis induction in CD34<sup>+</sup>/CD38<sup>-</sup> using flow cytometry. Results are expressed as percent Annexin<sup>+</sup>/DAPI<sup>-</sup> CD34<sup>+</sup>/CD38<sup>-</sup> cells and show the mean±S.D. of 4 independent experiments. Asterisk (\*): p<0.05 compared to control. Lower left panel: The table shows the expression of the cytokine receptors G-CSFR (CD114), IL-3RA (CD123) and SCFR (CD117) on CD34<sup>+</sup>/CD38<sup>-</sup> cells from 4 patients with AML used in these experiments. Patients' numbers (#) refer to the patients' numbers defined in Table S3. Results are obtained using multi-color flow cytometry and are expressed as staining index as described in the supplement and were graded using the following score: -, 0-1.3; +/-, 1.31-3; +, 3.01-10; ++, >10. (B) Mononuclear cells from 1 patient with AML were incubated in RPMI 1640 medium and 10% FCS in the absence or presence of G-CSF, IL-3, or EPO at 37°C for 48 hours. Thereafter, cells were examined for apoptosis induction in CD34<sup>+</sup>/CD38<sup>-</sup> (left panel) and CD34<sup>+</sup>/CD38<sup>+</sup> cells (right panel) using AnnexinV/DAPI staining and flow cytometry. Results are expressed as histograms and show the percent of AnnexinV<sup>+</sup>/DAPI<sup>-</sup> cells. Abbreviations: AML, acute myeloid leukemia; DAPI, 4',6-diamidino-2-phenylindole; EPO, Erythropoietin; G-CSF, granulocyte colony stimulating factor; IL, interleukin; SCF, stem cell factor; D, diagnosis.

Figure S7

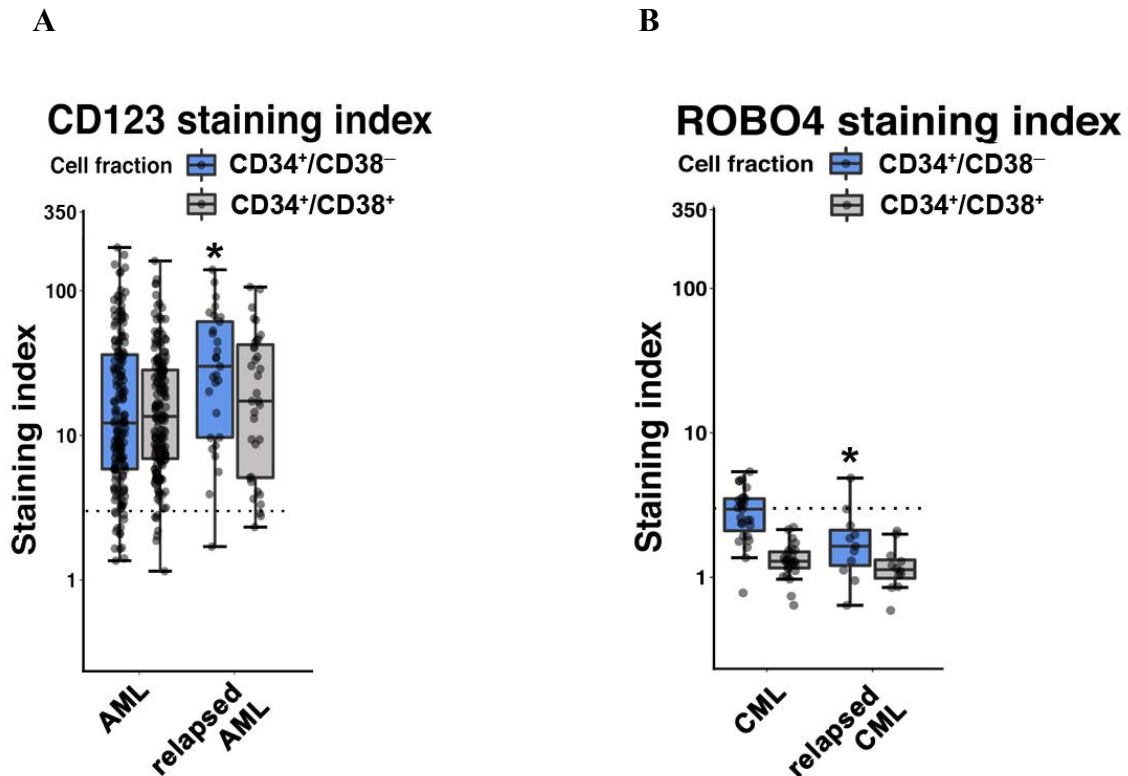

(A, B) Expression of surface antigens on CD34<sup>+</sup>/CD38<sup>-</sup> cells (blue boxes) and CD34<sup>+</sup>/CD38<sup>+</sup> cells (grey boxes) in patients with (A) acute myeloid leukemia (AML) and (B) chronic myeloid leukemia (CML) (both at diagnosis and at relapse). Cells were stained with antibodies against CD123 (IL-3RA) and ROBO4. Expression of these surface antigens on CD34<sup>+</sup>/CD38<sup>-</sup> and CD34<sup>+</sup>/CD38<sup>+</sup> cells was determined by multi-color flow cytometry as described in the supplement. The dotted line represents clear expression (staining index >3). The range of each box represents the 25th (lower box margin) to 75th (upper box margin) percentile. The middle line inside the boxes represents the median expression level. Asterisk (\*): p<0.05 compared to data obtained with CD34<sup>+</sup>/CD38<sup>-</sup> BM cells in diagnostic samples. Pairwise Wilcoxon rank-sum test and p values were adjusted for multiple comparison according to Benjamini-Hochberg.

**Figure S8A**

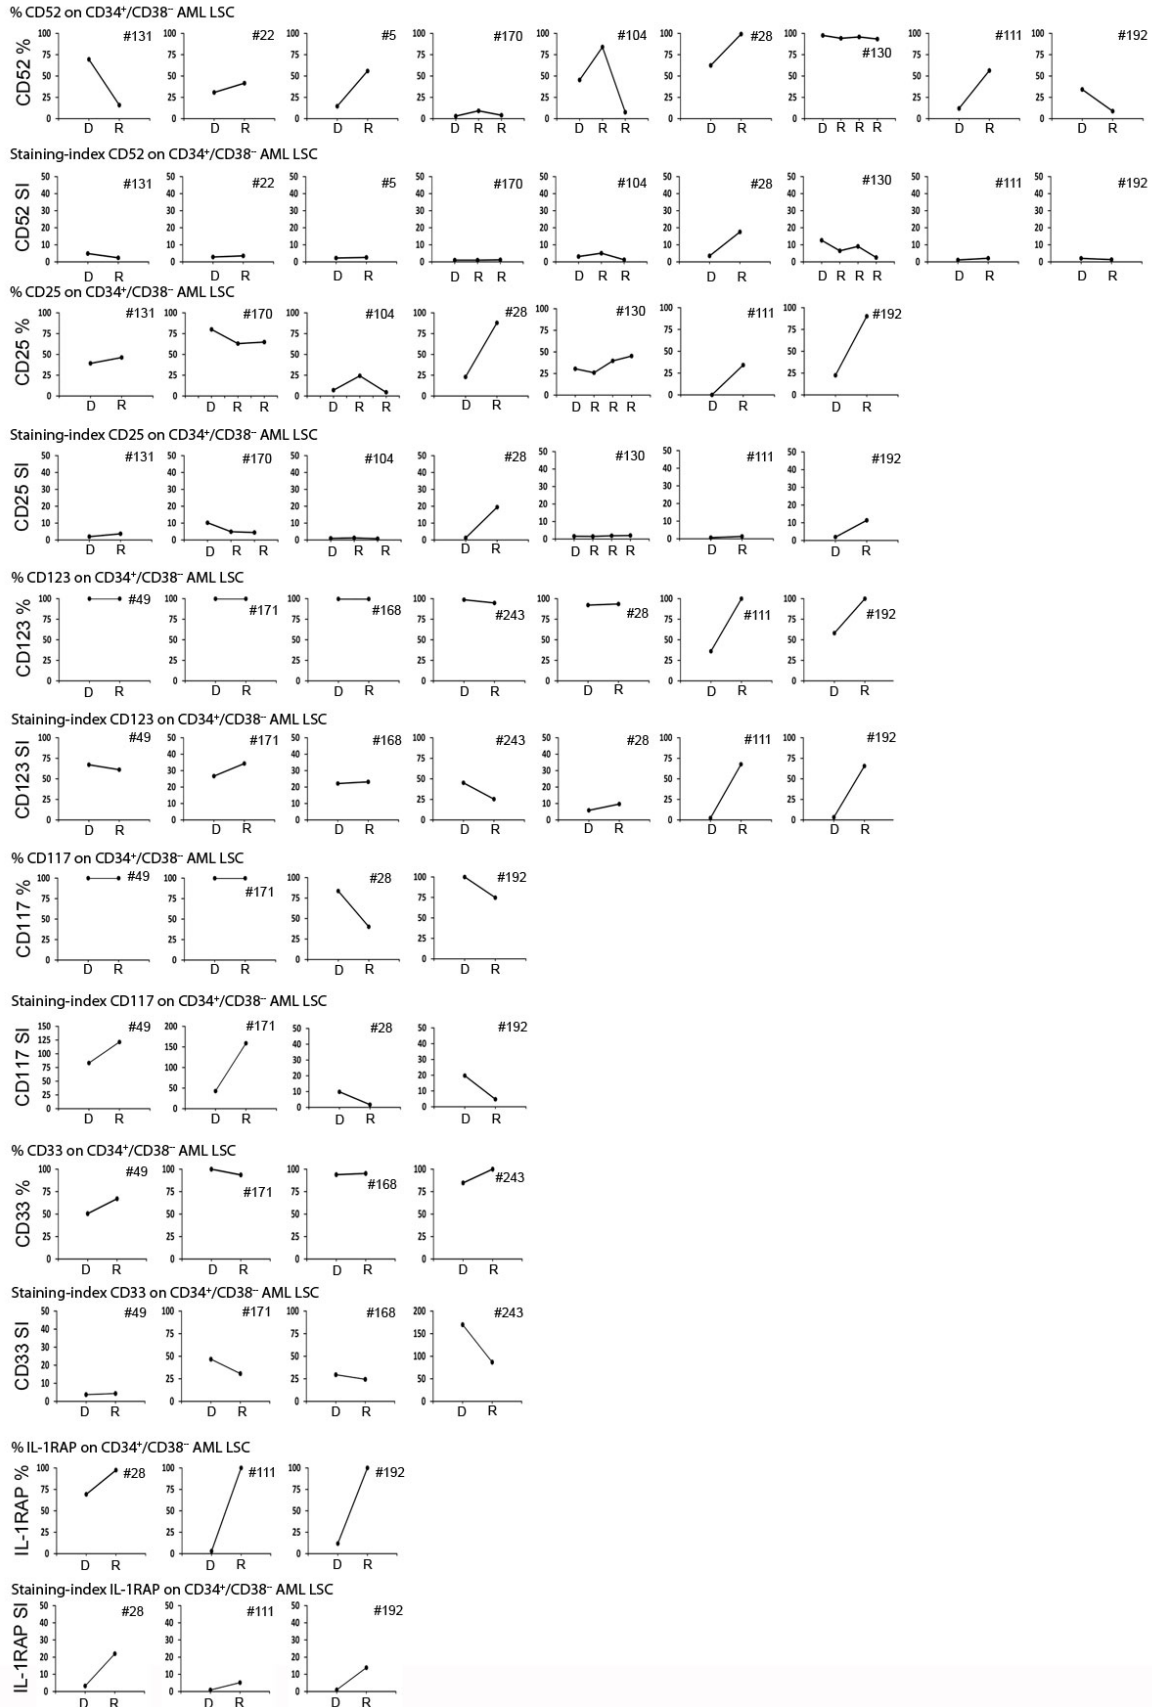

**Expression of surface markers on CD34<sup>+</sup>/CD38<sup>-</sup> AML LSC at the time of diagnosis (D) and relapse (R)**

Multi-color flow cytometry was used to analyze the expression of various surface markers on CD34<sup>+</sup>/CD38<sup>-</sup> AML LSC at the time of diagnosis and relapse samples. Each diagram represents a single patient. Expression levels for each marker analyzed are shown in percent (upper row) and as SI (lower row). Patients' numbers (#) refer to the patients' numbers defined in Table S3. Abbreviations: AML, acute myeloid leukemia; LSC, leukemic stem cells; SI, staining index; D, diagnosis; R, relapse.

**Figure S8B**

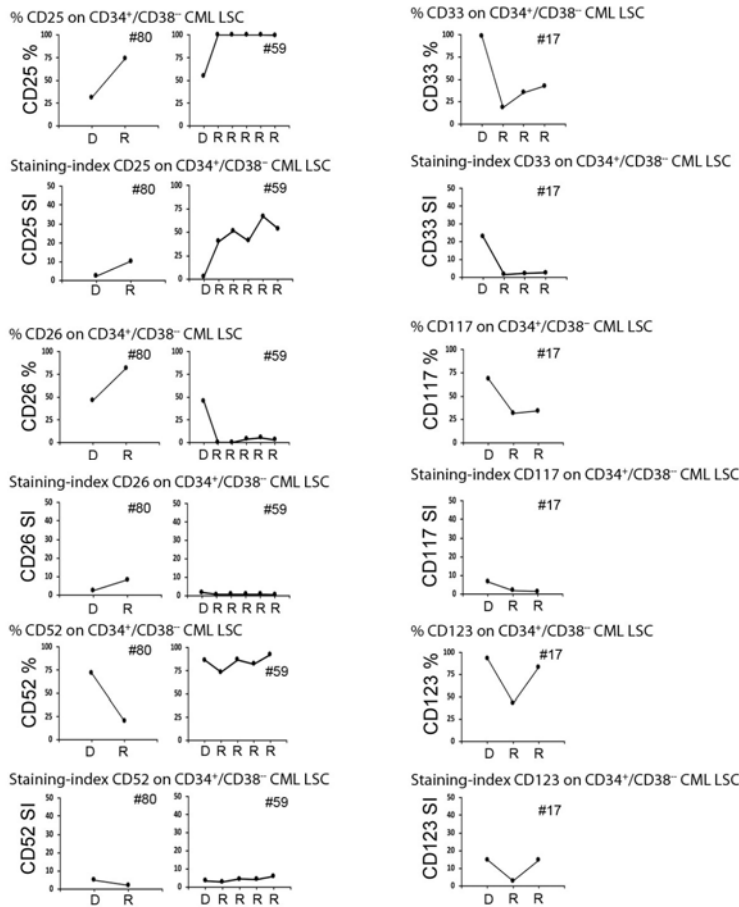

**Expression of surface markers on CD34<sup>+</sup>/CD38<sup>-</sup> CML LSC at the time of diagnosis (D) and relapse (R)**

Multi-color flow cytometry was used to analyze the expression of various surface markers on CD34<sup>+</sup>/CD38<sup>-</sup> CML LSC at the time of diagnosis and relapse samples. Each diagram represents a single patient. Expression levels for each marker analyzed are shown in percent (upper row) and as SI (lower row). Patients' numbers (#) refer to the patients' numbers defined in Table S2. Abbreviations: CML, chronic myeloid leukemia; LSC, leukemic stem cells; SI, staining index; D, diagnosis; R, relapse.

Figure S9

A

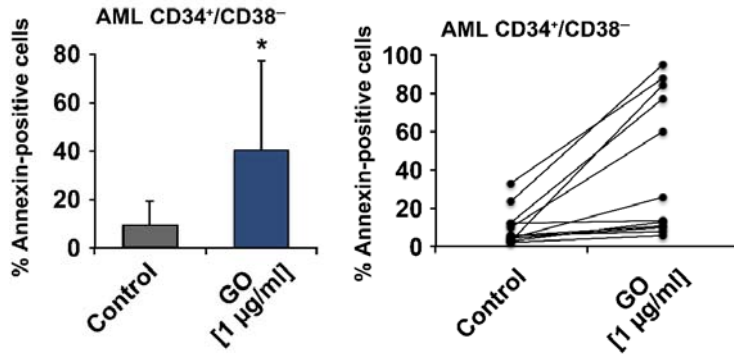

B

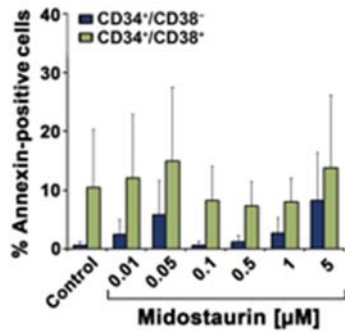

### Effects of targeted drugs on survival of leukemic stem cells (LSC) in AML

(A) Mononuclear cells (MNC) from 12 patients with AML (samples obtained at diagnosis or relapse) were incubated in RPMI 1640 medium and 10% fetal calf serum (FCS) in the absence (control, grey bar) or presence of GO, 1 µg/ml (blue bar) at 37°C for 48 hours. Thereafter, apoptosis was analyzed in CD34<sup>+</sup>/CD38<sup>-</sup> AML LSC using AnnexinV/DAPI staining and flow cytometry. Results are expressed as percent of AnnexinV<sup>+</sup>/DAPI<sup>-</sup> cells and represent the mean±S.D. from 12 experiments. Asterisk (\*):  $p < 0.05$  compared to control. Results are expressed as bar plot (left panel) or line plot (right panel). (B) MNC from 3 patients with AML (sample obtained at diagnosis) were incubated with various concentrations of midostaurin at 37°C for 48 hours. Then, apoptosis was analyzed in CD34<sup>+</sup>/CD38<sup>-</sup> AML LSC (blue bars) and CD34<sup>+</sup>/CD38<sup>+</sup> progenitor cells (green bars) using AnnexinV/DAPI staining and flow cytometry. Results are expressed as percent of AnnexinV<sup>+</sup>/DAPI<sup>-</sup> cells and represent the mean±S.D. from 3 experiments. Abbreviations: AML, acute myeloid leukemia; GO, gemtuzumab/ozogamicin.

Figure S10

A

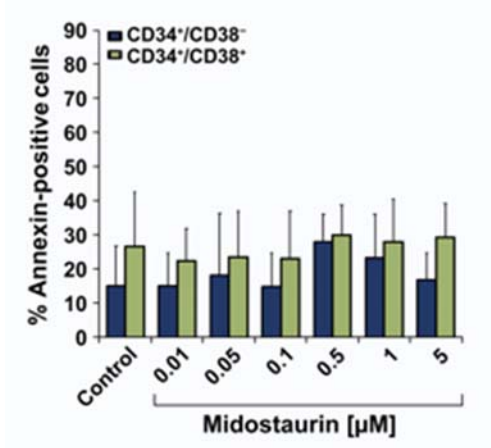

B

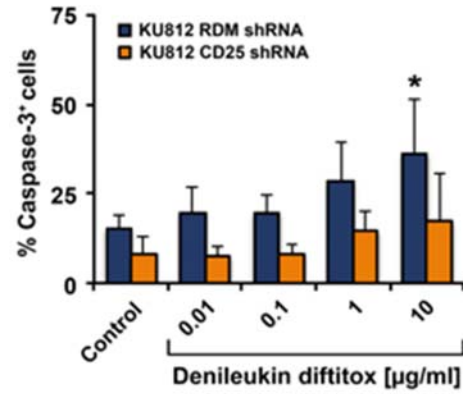

**Effects of target drugs on apoptosis induction in CML LSC and KU812 cells**

(A) Mononuclear cells (MNC) from 5 patients with CML (samples obtained at diagnosis or relapse) were incubated with various concentrations of midostaurin at 37°C for 48 hours. Then, apoptosis was analyzed in CD34<sup>+</sup>/CD38<sup>-</sup> AML LSC (blue bars) and CD34<sup>+</sup>/CD38<sup>+</sup> progenitor cells (green bars) using AnnexinV/DAPI staining and flow cytometry. Results are expressed as percent of AnnexinV<sup>+</sup>/DAPI<sup>-</sup> cells and represent the mean $\pm$ S.D. from 5 experiments. (B) KU812 cells transduced with a random control (RDM) shRNA (blue bars) or a CD25 shRNA (orange bars) were incubated in control medium (control) or in various concentrations of denileukin-diftitox at 37°C for 48 hours. Thereafter, cells were analyzed for apoptosis induction by caspase-3 staining and flow cytometry. Results are expressed as percent of caspase-3<sup>+</sup> cells and represent the mean $\pm$ S.D. from 4 experiments. Asterisk (\*):  $p < 0.05$  compared to control. Abbreviations: shRNA, short hairpin RNA; LSC, leukemic stem cells.



Figure S11

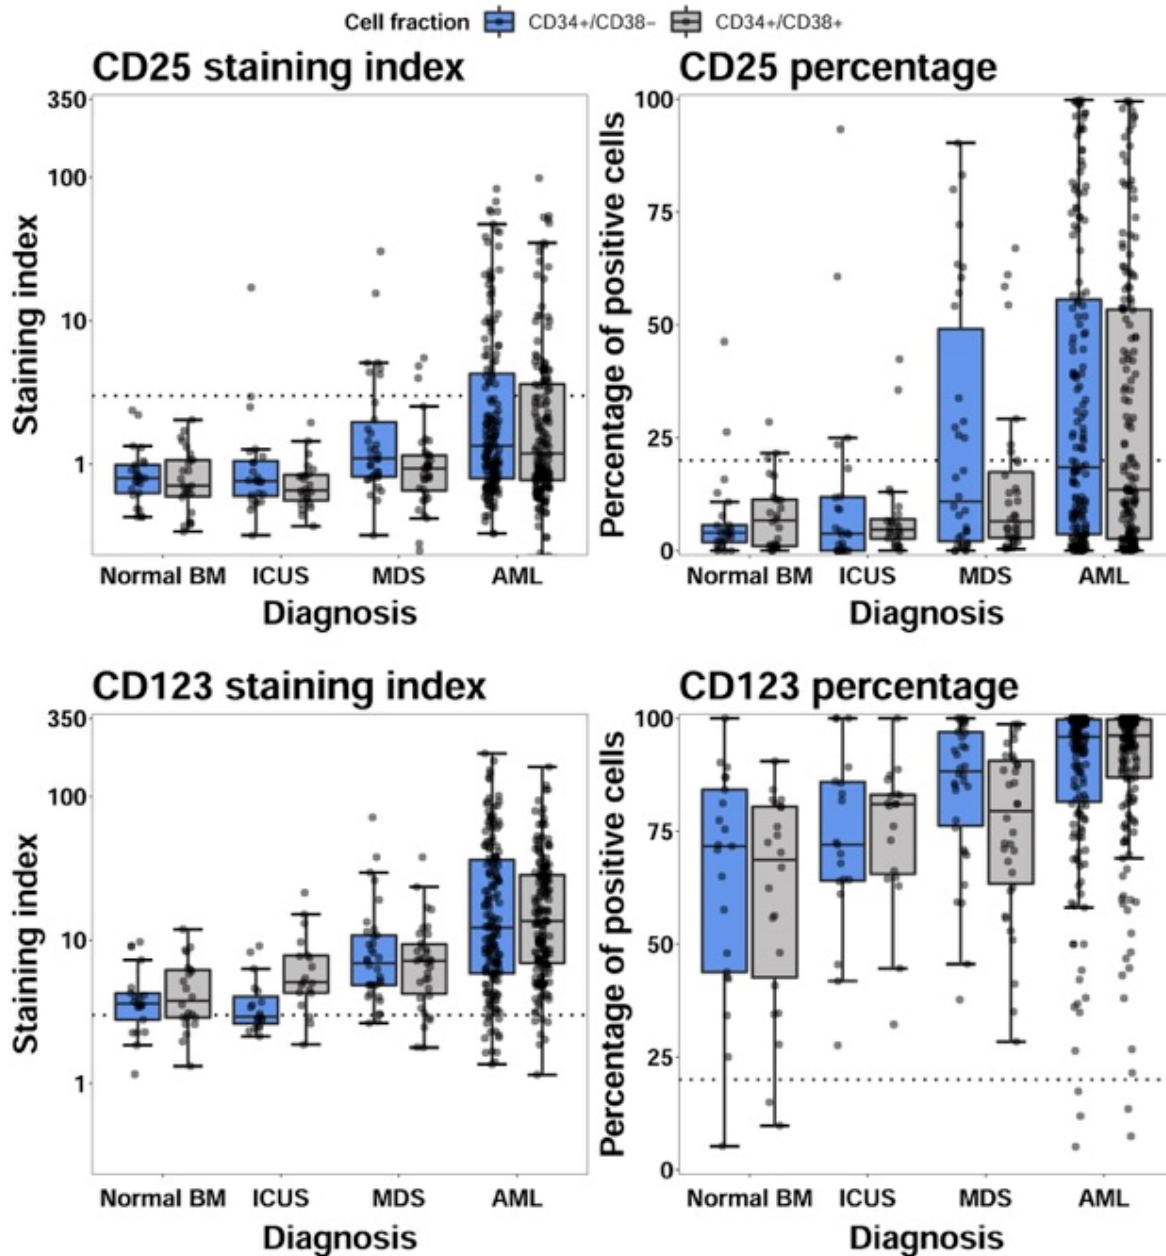

**Expression of CD25 and CD123 on preleukemic stem cells in MDS**

Boxblots show the expression of CD25 (upper panels) and CD123 (lower panels) on CD34<sup>+</sup>/CD38<sup>-</sup> (blue boxes) and CD34<sup>+</sup>/CD38<sup>+</sup> (grey boxes) in normal BM, ICUS, MDS and AML. Results are expressed as staining index (left panels) or percentage of positive cells (right panels). The dotted line represents clear expression (staining index is higher than 3 or more than 20% positive cells). The range of each box represents the 25<sup>th</sup> (lower box margin) to 75<sup>th</sup> (upper box margin) percentile. The middle line inside the boxes represent the median expression level. Abbreviations: AML, acute myeloid leukemia; BM, bone marrow; ICUS, idiopathic cytopenia of undetermined significance; MDS, myelodysplastic syndrome.

Figure S12

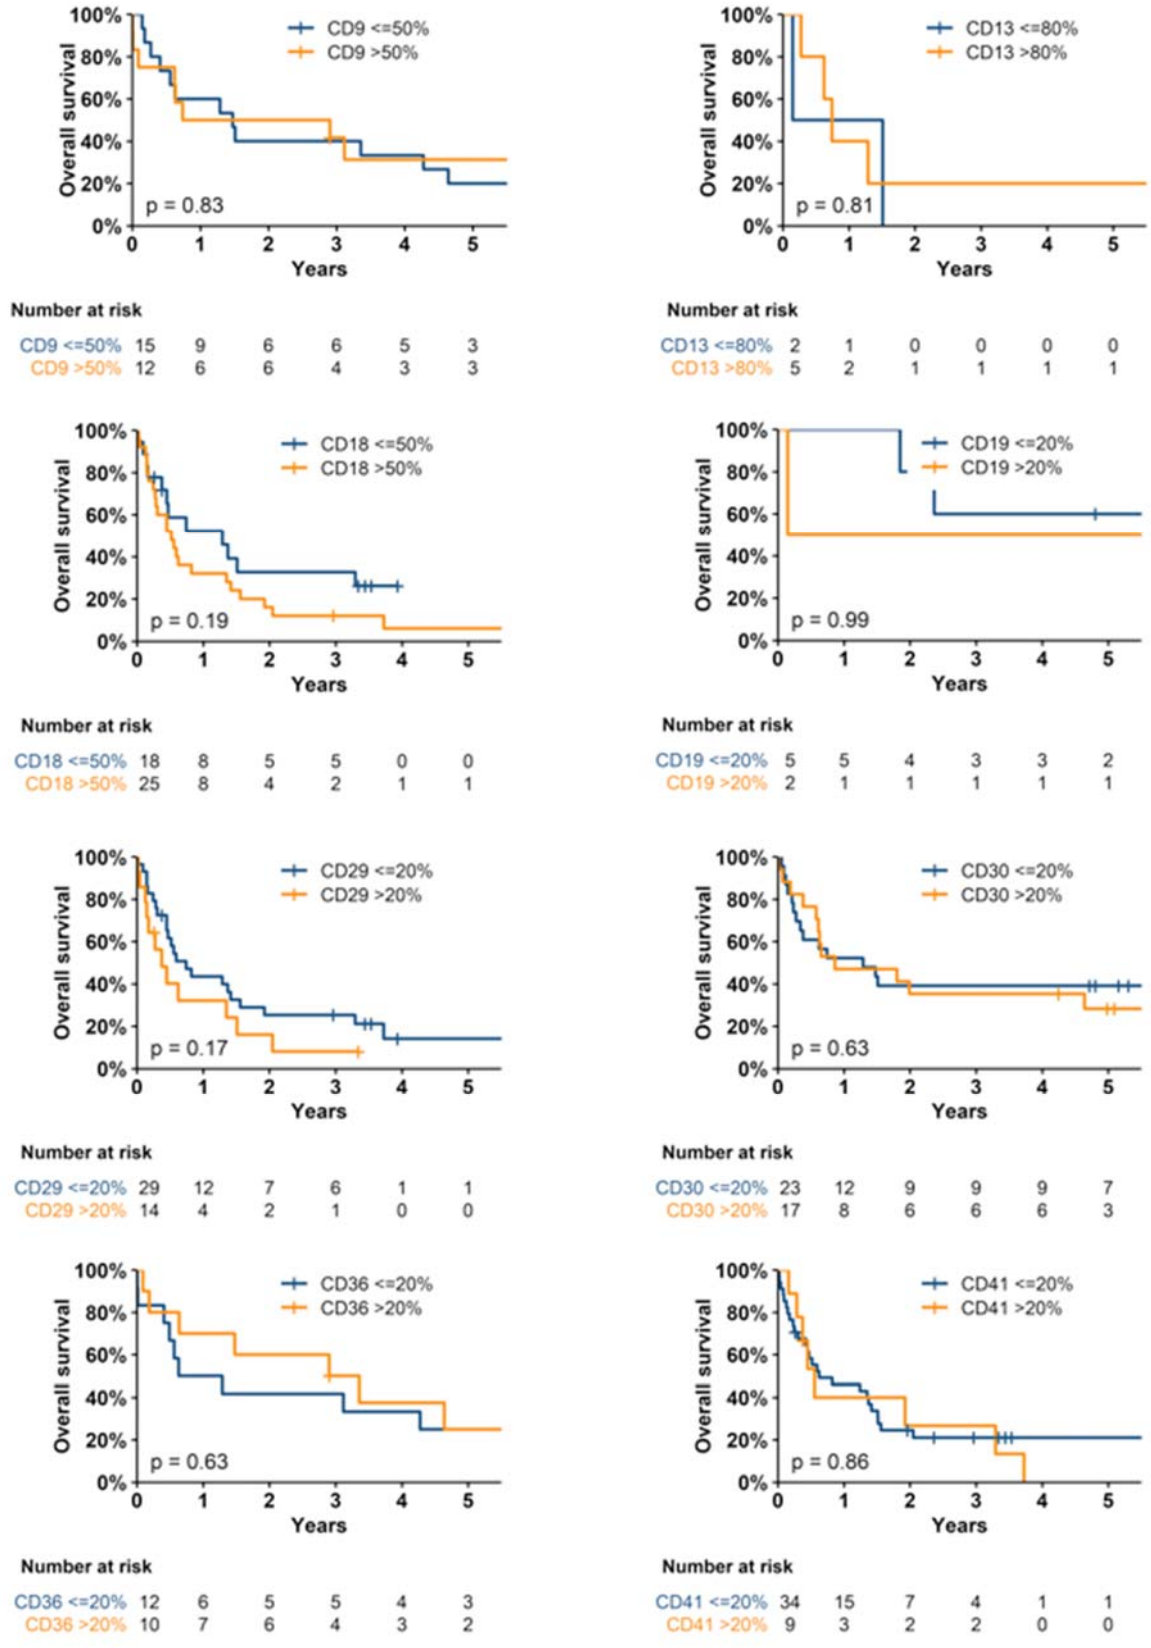

Figure S12 continued

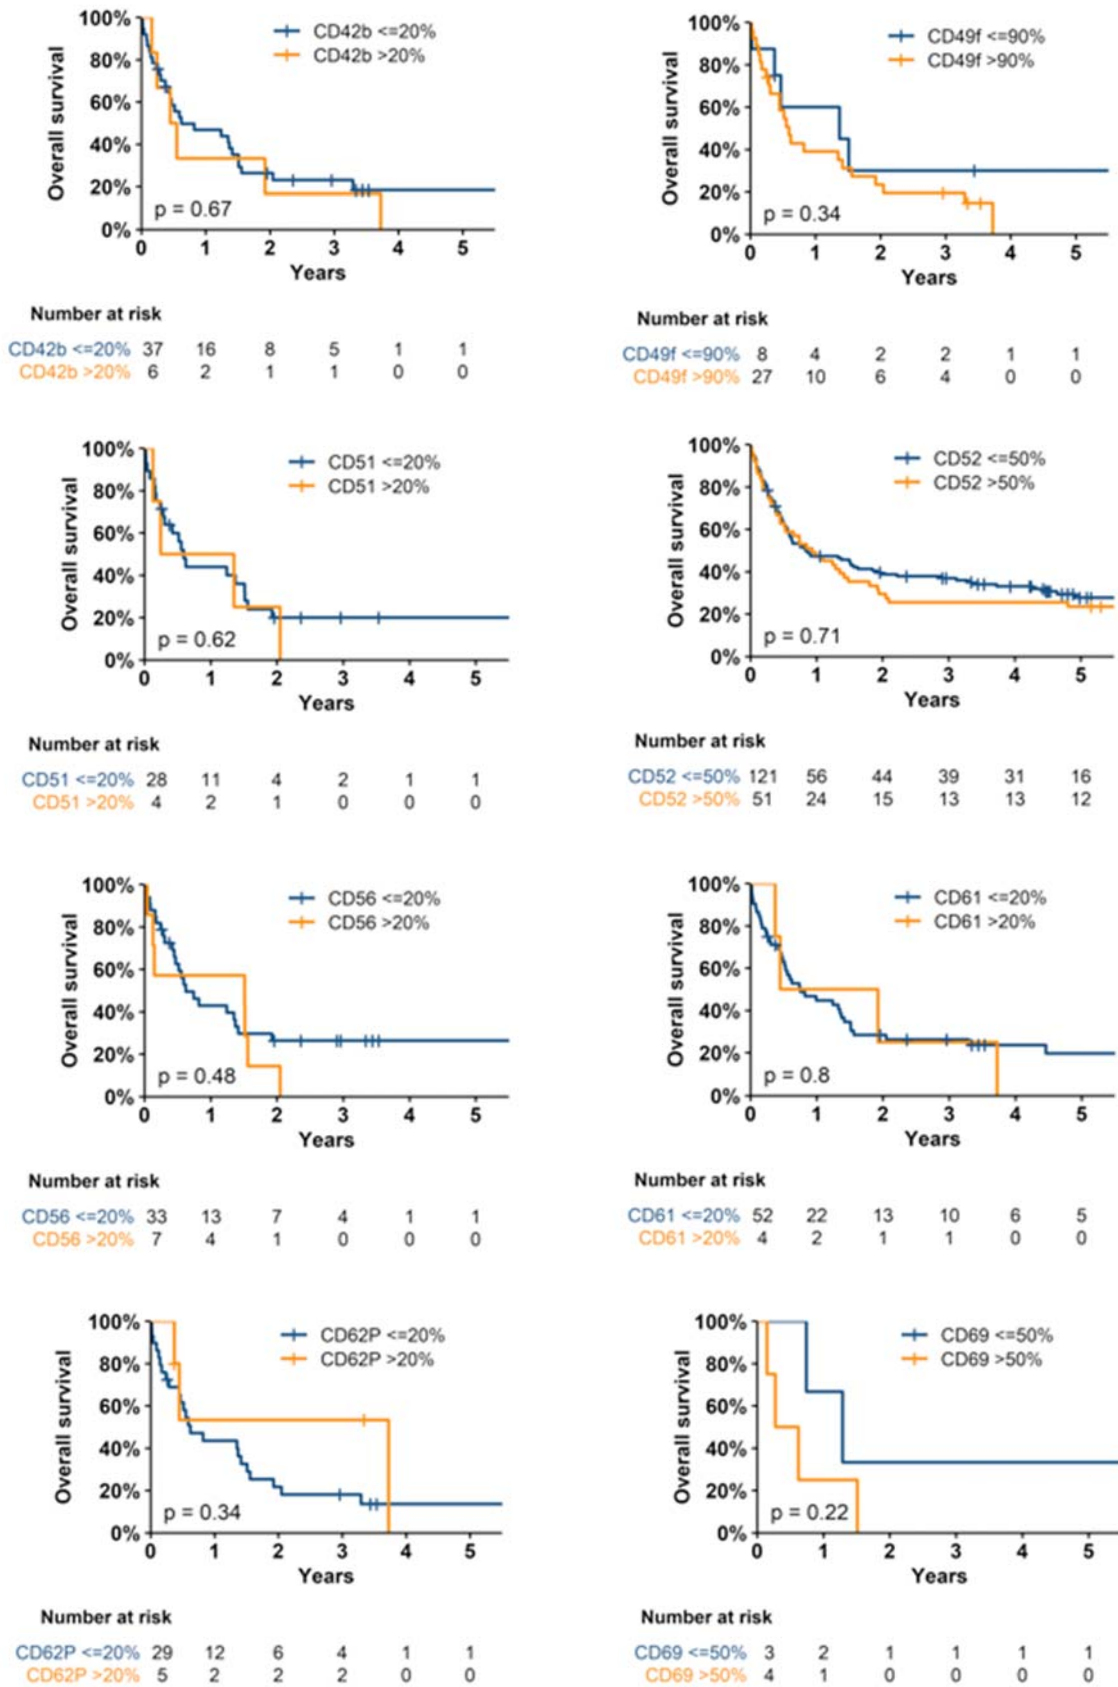

Figure S12 continued

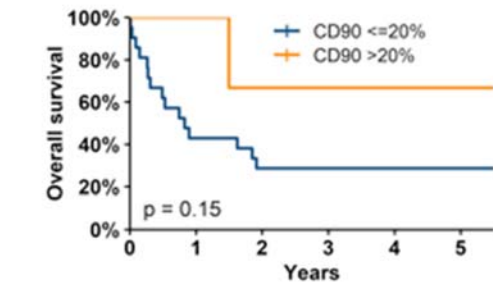

Number at risk

|                  |    |   |   |   |   |   |
|------------------|----|---|---|---|---|---|
| CD90 $\leq 20\%$ | 21 | 9 | 6 | 6 | 6 | 6 |
| CD90 $> 20\%$    | 3  | 3 | 2 | 2 | 2 | 2 |

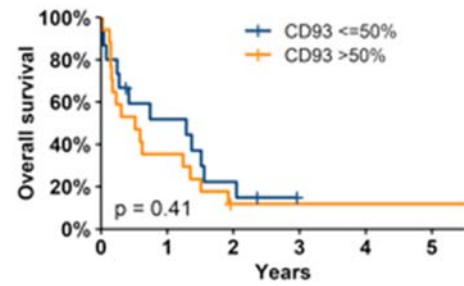

Number at risk

|                  |    |   |   |   |   |   |
|------------------|----|---|---|---|---|---|
| CD93 $\leq 50\%$ | 15 | 7 | 3 | 0 | 0 | 0 |
| CD93 $> 50\%$    | 17 | 6 | 1 | 1 | 1 | 1 |

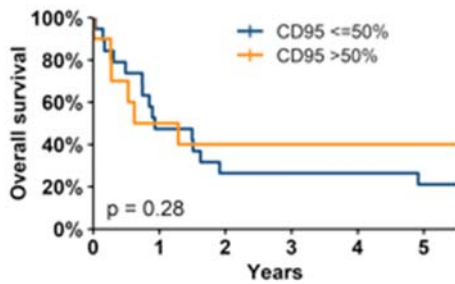

Number at risk

|                  |    |   |   |   |   |   |
|------------------|----|---|---|---|---|---|
| CD95 $\leq 50\%$ | 19 | 9 | 5 | 5 | 5 | 4 |
| CD95 $> 50\%$    | 10 | 5 | 4 | 4 | 4 | 4 |

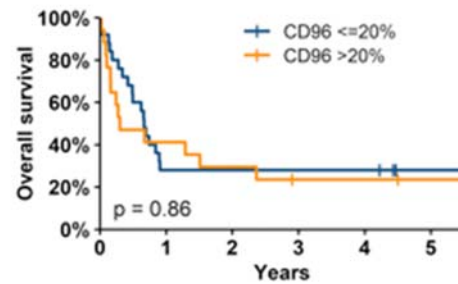

Number at risk

|                  |    |   |   |   |   |   |
|------------------|----|---|---|---|---|---|
| CD96 $\leq 20\%$ | 25 | 7 | 7 | 7 | 7 | 4 |
| CD96 $> 20\%$    | 17 | 7 | 5 | 3 | 3 | 2 |

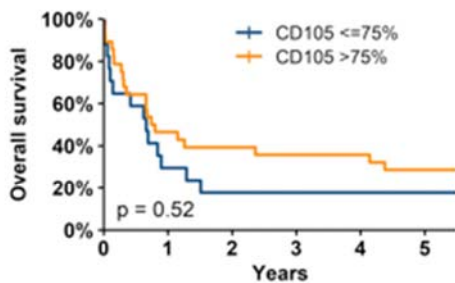

Number at risk

|                   |    |    |    |    |    |   |
|-------------------|----|----|----|----|----|---|
| CD105 $\leq 75\%$ | 17 | 5  | 3  | 3  | 3  | 3 |
| CD105 $> 75\%$    | 28 | 13 | 11 | 10 | 10 | 8 |

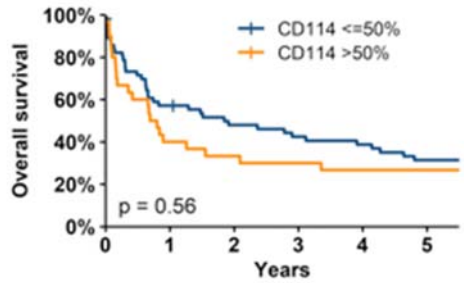

Number at risk

|                   |    |    |    |    |    |    |
|-------------------|----|----|----|----|----|----|
| CD114 $\leq 50\%$ | 57 | 32 | 26 | 23 | 21 | 17 |
| CD114 $> 50\%$    | 30 | 12 | 10 | 9  | 8  | 8  |

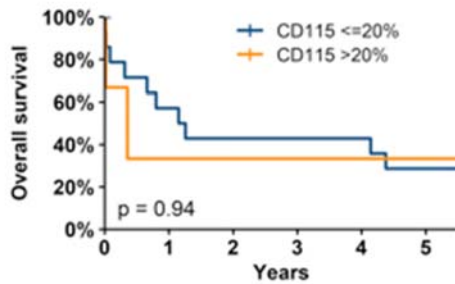

Number at risk

|                   |    |   |   |   |   |   |
|-------------------|----|---|---|---|---|---|
| CD115 $\leq 20\%$ | 15 | 8 | 6 | 6 | 6 | 4 |
| CD115 $> 20\%$    | 3  | 1 | 1 | 1 | 1 | 1 |

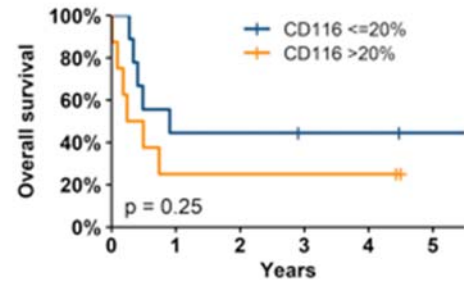

Number at risk

|                   |   |   |   |   |   |   |
|-------------------|---|---|---|---|---|---|
| CD116 $\leq 20\%$ | 9 | 4 | 4 | 3 | 3 | 2 |
| CD116 $> 20\%$    | 8 | 2 | 2 | 2 | 2 | 0 |

Figure S12 continued

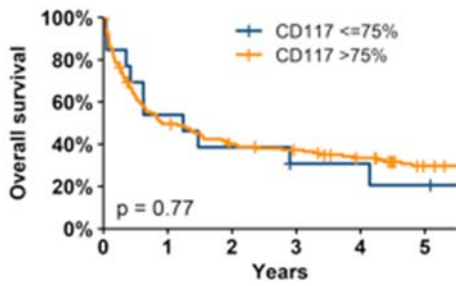

Number at risk

|             |     |    |    |    |    |    |
|-------------|-----|----|----|----|----|----|
| CD117 <=75% | 13  | 7  | 5  | 3  | 3  | 2  |
| CD117 >75%  | 145 | 70 | 55 | 49 | 40 | 28 |

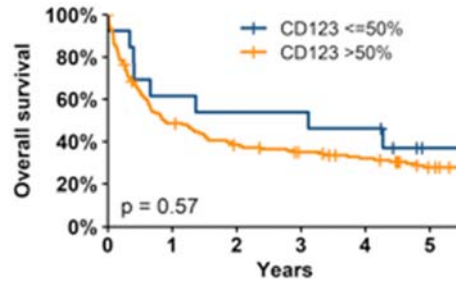

Number at risk

|             |     |    |    |    |    |    |
|-------------|-----|----|----|----|----|----|
| CD123 <=50% | 13  | 8  | 7  | 7  | 6  | 1  |
| CD123 >50%  | 154 | 73 | 56 | 48 | 41 | 30 |

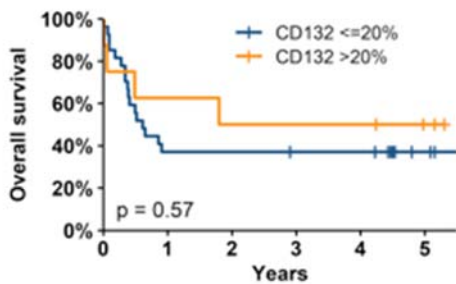

Number at risk

|             |    |    |    |   |   |   |
|-------------|----|----|----|---|---|---|
| CD132 <=20% | 27 | 10 | 10 | 9 | 9 | 3 |
| CD132 >20%  | 8  | 5  | 4  | 4 | 4 | 2 |

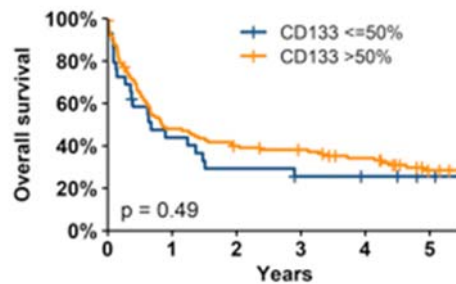

Number at risk

|             |     |    |    |    |    |    |
|-------------|-----|----|----|----|----|----|
| CD133 <=50% | 29  | 12 | 8  | 6  | 5  | 3  |
| CD133 >50%  | 115 | 54 | 44 | 40 | 33 | 20 |

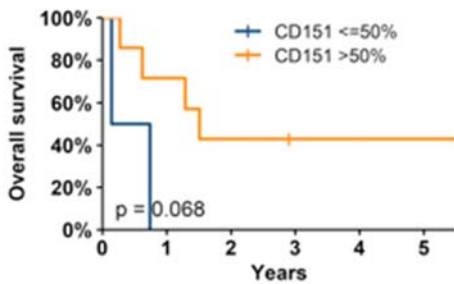

Number at risk

|             |   |   |   |   |   |   |
|-------------|---|---|---|---|---|---|
| CD151 <=50% | 2 | 0 | 0 | 0 | 0 | 0 |
| CD151 >50%  | 7 | 5 | 3 | 2 | 2 | 2 |

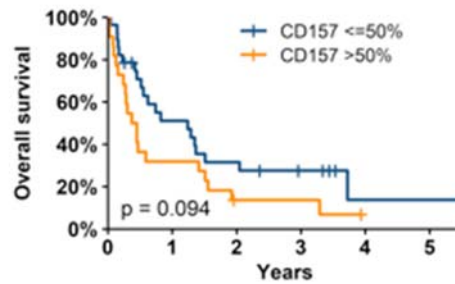

Number at risk

|             |    |    |   |   |   |   |
|-------------|----|----|---|---|---|---|
| CD157 <=50% | 28 | 13 | 8 | 5 | 1 | 1 |
| CD157 >50%  | 22 | 7  | 2 | 2 | 0 | 0 |

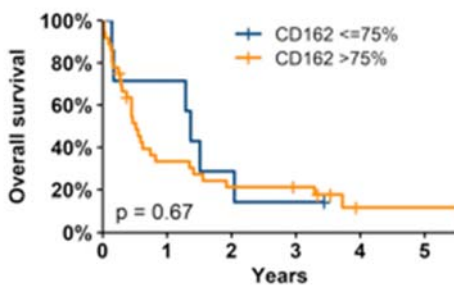

Number at risk

|             |    |    |   |   |   |   |
|-------------|----|----|---|---|---|---|
| CD162 <=75% | 7  | 5  | 2 | 1 | 0 | 0 |
| CD162 >75%  | 36 | 11 | 7 | 6 | 1 | 1 |

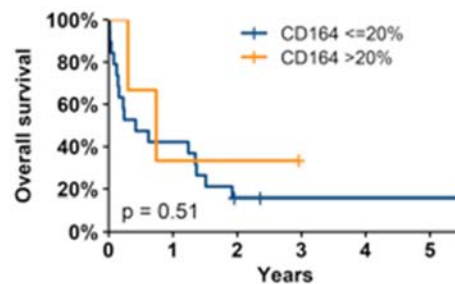

Number at risk

|             |    |   |   |   |   |   |
|-------------|----|---|---|---|---|---|
| CD164 <=20% | 19 | 8 | 2 | 1 | 1 | 1 |
| CD164 >20%  | 3  | 1 | 1 | 0 | 0 | 0 |



Figure S12 continued

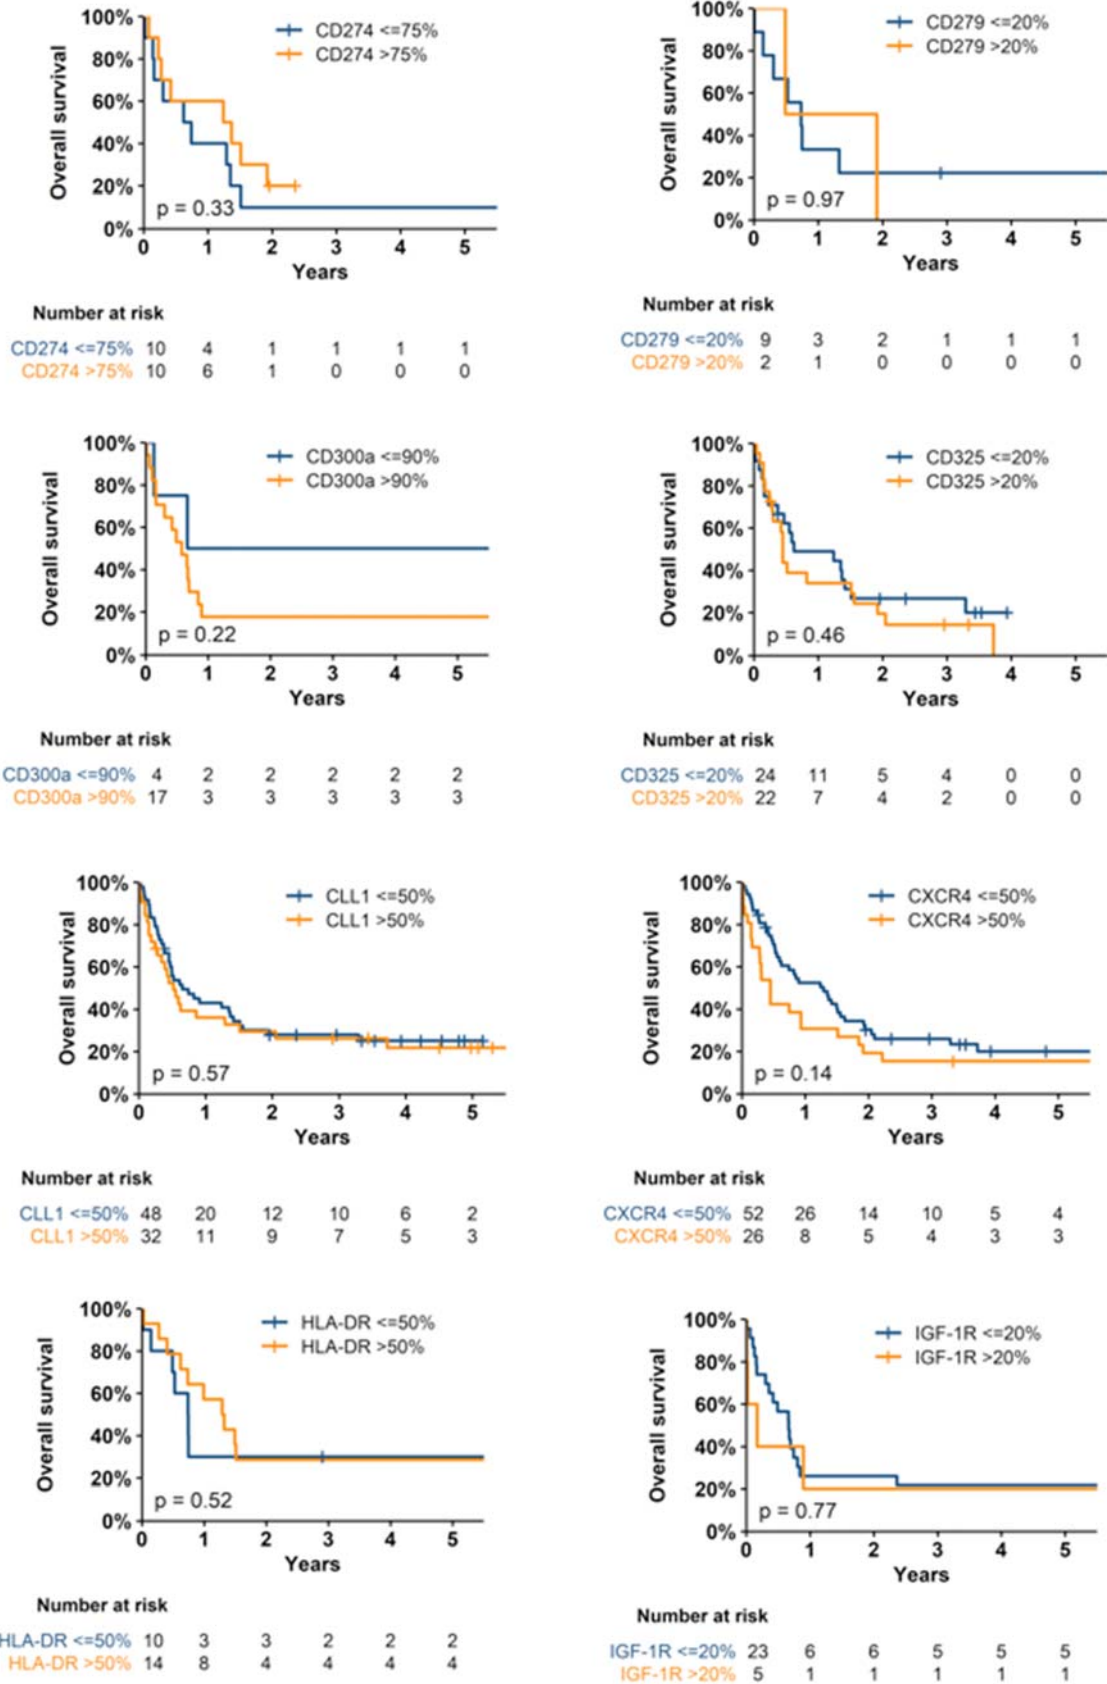

Figure S12 continued

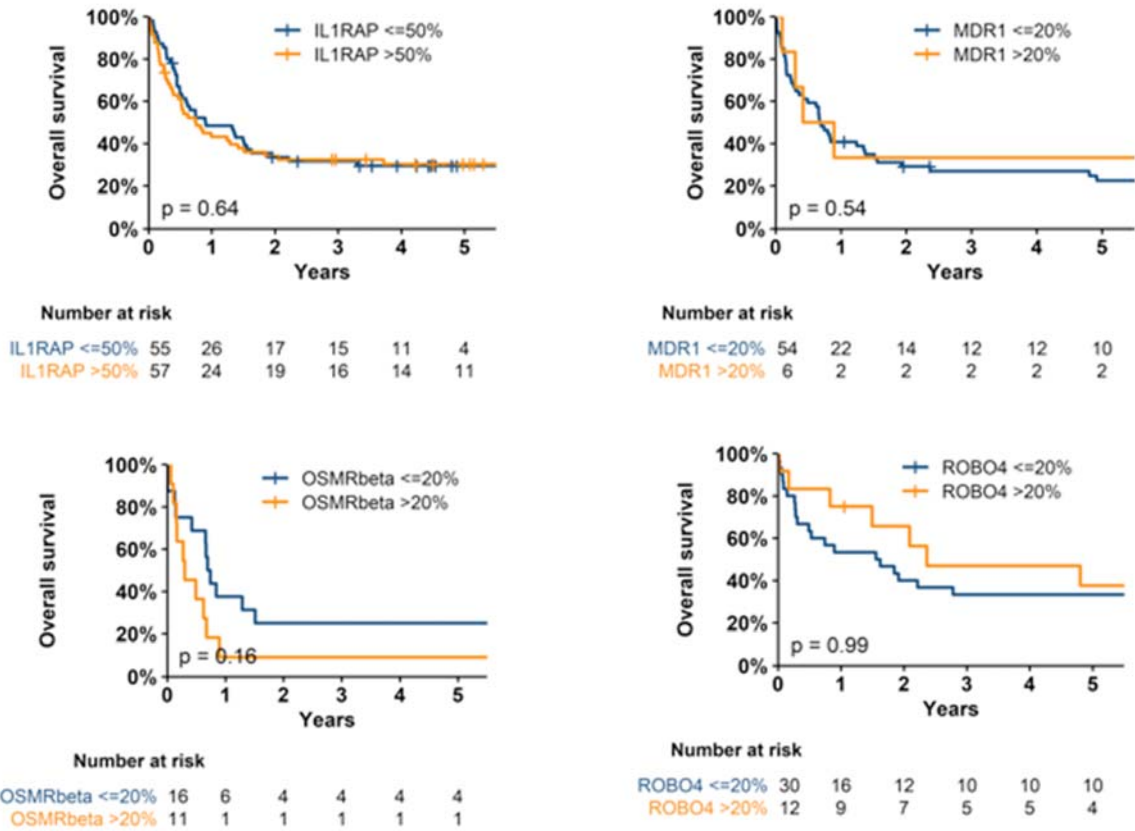

**Overall survival of patients with AML**

Patients were split into two groups per marker based on higher (yellow graphs) or lower (blue graphs) expression of surface antigens on CD34<sup>+</sup>/CD38<sup>-</sup> cells as indicated in each subpanel. The thresholds of expression were selected based on patient distribution and formation of subsets in flow cytometry experiments (see supplement). Overall survival of patients with AML was calculated according to the method of Kaplan and Meier. p values were calculated by log-rank test.

Figure S13

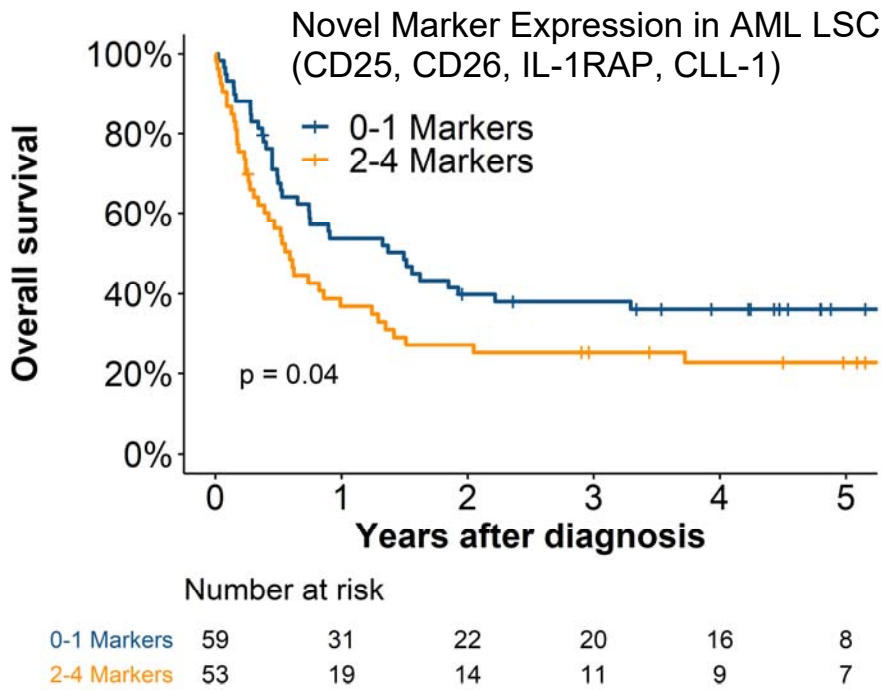

**Influence of the numbers of aberrantly expressed surface markers in LSC on overall survival in patients with AML**

A total number of 112 patients with AML were included. Patients were split into two groups based on aberrant expression of surface markers on CD34<sup>+</sup>/CD38<sup>-</sup> LSC: group A (blue graph: one or no marker detected on LSC) and B (yellow graph: two to four markers detected on LSC). The following aberrantly expressed markers were included in these analyses: CD25 (IL-2RA), CD26 (DPPIV), CD371 (CLL-1), and IL1-RAP. Expression thresholds of markers selected to define subsets was based on patient distribution and formation of sizable subsets. Only patients in whom at least 3 markers were analyzed were included. Overall survival was calculated according to the method of Kaplan and Meier. The p value was calculated by log-rank test.



Figure S14

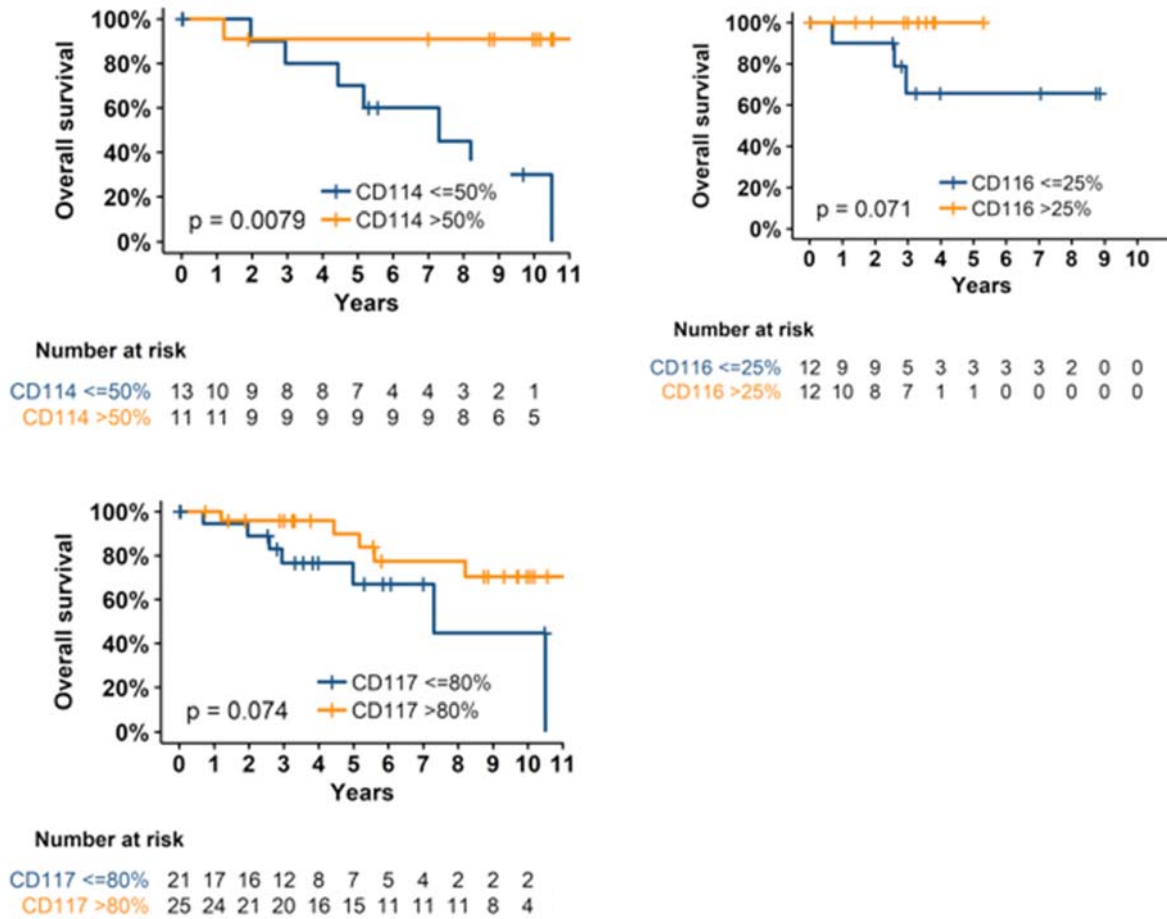

**Overall survival of patients with CML**

Patients were split into two groups per marker based on higher (yellow graphs) or lower (blue graphs) expression of surface antigens on CD34<sup>+</sup>/CD38<sup>-</sup> cells as indicated in each subpanel. The thresholds of expression were selected based on patient distribution and formation of subsets in flow cytometry experiments (see supplement). Samples were obtained from patients with CML in CP, AP and BP. Overall survival of patients with CML was calculated according to the method of Kaplan and Meier. p values were calculated by log-rank test. Abbreviations: CML, chronic myeloid leukemia; CP, chronic phase; AP, accelerated phase; BP, blast phase.

## Supplemental (S) Tables

**Table S1**

Specification of antibodies used in multicolor flow cytometry experiments

| CD    | Antigen              | Clone      | Conjugate    | Species, Isotype | Manufacturer   |
|-------|----------------------|------------|--------------|------------------|----------------|
| n.c.  | Isotype control      | MOPC-21    | PE           | Mouse, IgG1      | BD Biosciences |
| n.c.  | Isotype control      | 20102      | PE           | Mouse, IgG2A     | R&D Systems    |
| n.c.  | Isotype control      | X39        | FITC         | Mouse, IgG2A     | BD Biosciences |
| n.c.  | Isotype control      | 133303     | PE           | Mouse, IgG2B     | R&D Systems    |
| n.c.  | Isotype control      | polyclonal | biotinylated | Sheep, IgG       | R&D Systems    |
| CD3   | TcR                  | UCHT1      | APC          | Mouse, IgG1      | BD Biosciences |
| CD9   | Tetraspanin 29       | M-L13      | PE           | Mouse, IgG1      | BD Biosciences |
| CD11a | Integrin $\alpha$ -L | G43-25B    | PE           | Mouse, IgG2A     | BD Biosciences |
| CD13  | ANPEP                | WM15       | PE           | Mouse, IgG1      | BD Biosciences |
| CD14  | LPSR                 | TÜK4       | FITC         | Mouse, IgG2A     | Dako           |
| CD18  | Integrin $\beta$ 2   | 6.7        | PE           | Mouse, IgG1      | BD Biosciences |
| CD19  | B4                   | 4G7        | FITC         | Mouse, IgG1      | BD Biosciences |
| CD19  | B4                   | 4G7        | PE           | Mouse, IgG1      | BD Biosciences |
| CD20  | MS4A1                | L27        | PE           | Mouse, IgG1      | BD Biosciences |
| CD23  | Fc $\epsilon$ R2     | M-L233     | PE           | Mouse, IgG1      | BD Biosciences |
| CD25  | IL2R $\alpha$        | 2A3        | PE           | Mouse, IgG1      | BD Biosciences |
| CD26  | DPPIV                | M-A261     | PE           | Mouse, IgG1      | BD Biosciences |
| CD29  | Integrin $\beta$ 1   | 419217     | PE           | Mouse, IgG2B     | R&D Systems    |
| CD30  | TNFRSF8              | BerH8      | PE           | Mouse, IgG1      | BD Biosciences |
| CD33  | Siglec-3             | WM53       | PE           | Mouse, IgG1      | BD Biosciences |
| CD34  | HPCA-1               | 581        | FITC         | Mouse, IgG1      | BD Biosciences |
| CD34  | HPCA-1               | 581        | FITC         | Mouse, IgG1      | BioLegend      |
| CD34  | HPCA-1               | 581        | PE           | Mouse, IgG1      | BD Biosciences |
| CD34  | HPCA-1               | 581        | pacific blue | Mouse, IgG1      | BioLegend      |
| CD36  | TSPR                 | 5-271      | PE           | Mouse, IgG2A     | BioLegend      |
| CD38  | T10                  | HIT2       | APC          | Mouse, IgG1      | BD Biosciences |
| CD41  | Integrin $\alpha$ 2b | HIP8       | PE           | Mouse, IgG1      | BioLegend      |
| CD42b | GP1B $\alpha$        | HIP1       | PE           | Mouse, IgG1      | BioLegend      |
| CD43  | Sialophorin          | 1G10       | PE           | Mouse, IgG1      | BD Biosciences |
| CD44  | Hermes               | 515        | PE           | Mouse, IgG1      | BD Biosciences |
| CD45  | LCA                  | 2D1        | APC-H7       | Mouse, IgG1      | BD Biosciences |
| CD45  | LCA                  | 2D1        | PerCP        | Mouse, IgG1      | BD Biosciences |
| CD45  | LCA                  | HI30       | V500         | Mouse, IgG1      | BD Biosciences |
| CD47  | MER6                 | B6H12      | PE           | Mouse, IgG1      | BD Biosciences |
| CD49f | Integrin $\alpha$ 6  | GoH3       | PE           | Rat, IgG2a       | BioLegend      |

| CD      | Antigen                        | Clone          | Conjugate | Species, Isotype | Manufacturer    |
|---------|--------------------------------|----------------|-----------|------------------|-----------------|
| CD51    | Integrin $\alpha$ V            | NKI-M9         | PE        | Mouse, IgG2A     | BioLegend       |
| CD51/61 | Integrin $\alpha$ V/ $\beta$ 3 | 23C6           | PE        | Mouse, IgG1      | BioLegend       |
| CD52    | CAMPATH-1                      | HI186          | PE        | Mouse, IgG2B     | BioLegend       |
| CD56    | NCAM1                          | NCAM16.2       | PE        | Mouse, IgG2B     | BD Biosciences  |
| CD61    | Integrin $\beta$ 3             | VI-PL2         | PE        | Mouse, IgG1      | BioLegend       |
| CD62P   | SELP                           | AK-4           | PE        | Mouse, IgG1      | eBioscience     |
| CD69    | CLEC2C                         | FN50           | PE        | Mouse, IgG1      | BioLegend       |
| CD90    | Thy-1                          | 5E10           | PE        | Mouse, IgG1      | BD Biosciences  |
| CD93    | MXRA4                          | VIMD2          | PE        | Mouse, IgG1      | BioLegend       |
| CD95    | FAS                            | DX2            | PE        | Mouse, IgG1      | BD Biosciences  |
| CD96    | Tactile                        | NK92.39        | PE        | Mouse, IgG1      | eBioscience     |
| CD97    | ADGRE5                         | VIM3b          | PE        | Mouse, IgG1      | BioLegend       |
| CD99    | MIC2                           | 3B2/TA8        | PE        | Mouse, IgG2A     | eBiosciences    |
| CD105   | Endoglin                       | 166707         | PE        | Mouse, IgG1      | R&D Systems     |
| CD110   | TPOR                           | 167639         | PE        | Mouse, IgG2A     | R&D Systems     |
| CD114   | G-CSFR                         | LMM741         | PE        | Mouse, IgG1      | BD Biosciences  |
| CD115   | M-CSFR                         | 61708          | PE        | Mouse, IgG1      | R&D Systems     |
| CD116   | GM-CSFR $\alpha$               | hGMCSFR-M1     | PE        | Mouse, IgG1      | BD Biosciences  |
| CD117   | SCFR/KIT                       | 104D2          | PE        | Mouse, IgG1      | BD Biosciences  |
| CD122   | IL-2R $\beta$                  | Mik- $\beta$ 3 | PE        | Mouse, IgG1      | BD Biosciences  |
| CD123   | IL-3R $\alpha$                 | 32703          | PE        | Mouse, IgG1      | R&D Systems     |
| CD123   | IL-3R $\alpha$                 | 7G3            | PE        | Mouse, IgG2A     | BD Biosciences  |
| CD123   | IL-3R $\alpha$                 | AC145          | APC       | Mouse, IgG2A     | Miltenyi Biotec |
| CD129   | IL-9R                          | 33423          | PE        | Mouse, IgG1      | R&D Systems     |
| CD131   | IL-3R $\beta$                  | 1C1            | PE        | Mouse, IgG1      | Abcam           |
| CD132   | IL-2R $\gamma$                 | AG184          | PE        | Mouse, IgG1      | BD Biosciences  |
| CD133   | Prominin 1                     | AC133          | PE        | Mouse, IgG1      | Miltenyi Biotec |
| CD134   | OX40                           | ACT35          | PE        | Mouse, IgG1      | BD Biosciences  |
| CD135   | FLT3                           | BV10A4H2       | PE        | Mouse, IgG1      | Biolegend       |
| CD150   | SLAMF1                         | 7D4            | PE        | Mouse, IgG1      | BioLegend       |
| CD151   | RAPH                           | PETA-3         | PE        | Mouse, IgG1      | BD Biosciences  |
| CD157   | BST1                           | SY/11B5        | PE        | Mouse, IgG1      | BD Biosciences  |
| CD162   | Selectin P ligand              | KPL-1          | PE        | Mouse, IgG1      | BD Biosciences  |
| CD164   | Sialomucin                     | 67D2           | PE        | Mouse, IgG1      | BioLegend       |
| CD167a  | DDR1                           | 51D6           | PE        | Mouse, IgG3      | BioLegend       |
| CD184   | CXCR4                          | 12G5           | PE        | Mouse, IgG2A     | BD Biosciences  |
| CD203c  | ENPP3                          | 97A6           | PE        | Mouse, IgG1      | Immunotech      |
| CD206   | MMR                            | 15-2           | PE        | Mouse, IgG1      | BioLegend       |
| CD221   | IGF-1R                         | 33255          | PE        | Mouse, IgG1      | R&D Systems     |
| CD243   | MDR1                           | 15D3           | PE        | Mouse, IgG1      | BD Biosciences  |
| CD252   | OX40L                          | ik-1           | PE        | Mouse, IgG1      | BD Biosciences  |
| CD271   | NGF-R                          | C40-1457       | PE        | Mouse, IgG1      | BD Biosciences  |
| CD273   | PD-L2                          | MIH18          | PE        | Mouse, IgG1      | BioLegend       |

| CD     | Antigen       | Clone      | Conjugate    | Species, Isotype | Manufacturer   |
|--------|---------------|------------|--------------|------------------|----------------|
| CD274  | PD-L1         | 29E.2A3    | PE           | Mouse, IgG2B     | BioLegend      |
| CD279  | PD1           | EH12.2H7   | PE           | Mouse, IgG1      | BioLegend      |
| CD300a | CMRF-35-H9    | MEM-260    | PE           | Mouse, IgG1      | Abcam          |
| CD309  | KDR/VEGFR-2   | 89106      | PE           | Mouse, IgG1      | R&D Systems    |
| CD321  | JAM-1         | M.Ab.F11   | PE           | Mouse, IgG1      | BD Biosciences |
| CD325  | Cadherin 2    | 8C11       | PE           | Mouse, IgG1      | BD Biosciences |
| CD332  | FGFR2         | 98725      | PE           | Mouse, IgG1      | R&D Systems    |
| CD371  | CLL-1/CLEC12A | 50C1       | PE           | Mouse, IgG2A     | BD Biosciences |
| n.c.   | EPOR          | 38409      | PE           | Mouse, IgG2B     | R&D Systems    |
| n.c.   | HLA-DR        | G46-6      | PE           | Mouse, IgG2A     | BD Biosciences |
| n.c.   | IL-1RAP       | 89412      | PE           | Mouse, IgG1      | R&D Systems    |
| n.c.   | MET/HGFR      | 95106      | PE           | Mouse, IgG1      | R&D Systems    |
| n.c.   | NPDC1         | polyclonal | biotinylated | Sheep, IgG       | R&D Systems    |
| n.c.   | OSMR $\beta$  | AN-U2      | PE           | Mouse, IgG1      | Biotechnology  |
| n.c.   | ROBO4         | 265703     | PE           | Mouse, IgG2A     | R&D Systems    |

Abbreviations: CD, cluster of differentiation; PE, phycoerythrin; FITC, fluorescein isothiocyanate; PerCP, peridinin chlorophyll protein; APC, allophycocyanin; n.c., not (yet) clustered; Ig, immunoglobulin; TcR, T cell receptor; LPSR, lipopolysaccharide-related antigen; IL-2RA, interleukin-2 receptor alpha chain; DPPIV, dipeptidylpeptidase IV; HPCA-1, human precursor cell antigen-1; LCA, leukocyte common antigen; G-CSF, granulocyte colony-stimulating factor; SCF, stem cell factor; NGF, nerve growth factor; CLL-1, C-type lectin-like molecule-1; IL-1RAP, interleukin-1 receptor accessory protein; ROBO4, roundabout 4; EPOR, erythropoietin receptor; CXCR, C-X-C chemokine receptor; FGFR, fibroblast growth factor receptor; HGFR, hepatocyte growth factor receptor; HLA, human leucocyte antigen; NPDC1, neural proliferation differentiation and control protein 1; VEGFR, vascular endothelial growth factor receptors; NCAM, Neural cell adhesion molecule.

Company Locations: BD Bioscience, San José, CA, USA; R&D Systems, Minneapolis, MN, USA; Dako, Glostrup, Denmark; eBioscience, San Diego, CA, USA; Miltenyi Biotec, Bergisch Gladbach, Germany; BioLegend, San Diego, CA, USA; Santa Cruz Biotechnology, Dallas, TX, USA; Abcam, Cambridge, UK.

**Table S2**

Patients' characteristics – chronic myeloid leukemia (CML)

| <b>No. #</b> | <b>age<br/>(yrs)</b> | <b>gender<br/>(m/f)</b> | <b>diagnosis -<br/>CML phase</b> | <b>karyotype</b>      | <b>WBC<br/>(G/L)</b> | <b>Hb<br/>(g/dL)</b> | <b>PLT<br/>(G/L)</b> | <b>basophils (%)<br/>PB</b> | <b>blasts (%)<br/>PB BM</b> | <b>BCR-ABL1<br/>mutations</b> |
|--------------|----------------------|-------------------------|----------------------------------|-----------------------|----------------------|----------------------|----------------------|-----------------------------|-----------------------------|-------------------------------|
| 1            | 52                   | m                       | CP                               | 46,XY,t(9;22)         | 45.7                 | 14.7                 | 577                  | 10                          | 0 1                         | n.t.                          |
| 2            | 57                   | f                       | CP                               | 46,XX,t(9;22)         | 68.7                 | 12.6                 | 818                  | 7                           | 0 1                         | n.t.                          |
| 3            | 41                   | f                       | CP                               | 46,XX,t(9;22)         | 30.4                 | 9.6                  | 1172                 | 19                          | 1 1                         | n.t.                          |
| 4            | 65                   | m                       | AP                               | 46,XY,t(9;22)         | 273.6                | 7.7                  | 470                  | 8                           | 10 6                        | n.t.                          |
| 5            | 49                   | m                       | CP                               | 46,XY,t(9;22)         | 232.8                | 9.3                  | 1062                 | 6                           | 3 1                         | n.t.                          |
| 6            | 42                   | f                       | CP                               | 46,XX,t(9;22)         | 181.9                | 14.1                 | 148                  | 4                           | 1 2                         | n.t.                          |
| 7            | 37                   | m                       | CP                               | 46,XY,t(9;22)         | 396.0                | 9.3                  | 225                  | 4                           | 5 3                         | n.t.                          |
| 8            | 24                   | f                       | CP                               | 46,XX,t(9;22)         | 77.0                 | 12.3                 | 363                  | 5                           | 2 1                         | n.t.                          |
| 9*           | 47                   | m                       | BP                               | complex               | 3.2                  | 7.9                  | 30                   | 0                           | 35 97                       | G250E, E355A                  |
| 10           | 60                   | m                       | CP                               | 46,XY,t(9;22)         | 47.9                 | 14.3                 | 261                  | 3                           | 0 1                         | n.t.                          |
| 11           | 57                   | f                       | CP                               | 46,XX,t(9;22)         | 398.9                | 8.6                  | 165                  | 7                           | 1 1                         | n.t.                          |
| 12*          | 38                   | f                       | BP                               | complex               | 3.5                  | 9.6                  | 18                   | 0                           | 52 30                       | n.t.                          |
| 13           | 68                   | f                       | CP                               | 46,XX,t(9;22)         | 97.8                 | 10.9                 | 450                  | 6                           | 1 1                         | n.t.                          |
| 14           | 63                   | m                       | CP                               | 45,X,-Y,t(9;22)       | 93.5                 | 13.1                 | 305                  | 1                           | 1 1                         | n.t.                          |
| 15           | 80                   | f                       | CP                               | 46,XX,t(9;22)         | 96.3                 | 10.5                 | 477                  | 1                           | 0 1                         | n.t.                          |
| 16           | 67                   | m                       | CP                               | 46,XY,t(9;22)         | 35.9                 | 9.1                  | 186                  | 2                           | 0 2                         | n.t.                          |
| 17           | 39                   | m                       | AP                               | 46,XY,t(9;22),t(8;17) | 190.9                | 11.0                 | 347                  | 15                          | 3 2                         | n.t.                          |
| 18           | 82                   | f                       | CP                               | 46,XX,t(9;22)         | 32.6                 | 13.6                 | 326                  | 5                           | 0 1                         | n.t.                          |
| 19           | 19                   | m                       | CP                               | 46,XY,t(9;22)         | 175.8                | 8.7                  | 282                  | 3                           | 2 1                         | n.t.                          |
| 20           | 59                   | m                       | CP                               | 46,XY,t(9;22)         | 83.7                 | 13.5                 | 297                  | 4                           | 2 3                         | n.t.                          |
| 21           | 46                   | f                       | CP                               | 46,XX,t(9;22)         | 570.5                | 7.5                  | 342                  | 3                           | 1 2                         | n.t.                          |
| 22           | 22                   | f                       | CP                               | 46,XX,t(9;22)         | 26.6                 | 13.4                 | 354                  | 5                           | 0 1                         | n.t.                          |
| 23*          | 49                   | m                       | CP                               | 46,XY,t(9;11;22)      | 34.5                 | 14.0                 | 145                  | 1                           | 0 1                         | n.t.                          |
| 24           | 53                   | m                       | CP                               | 46,XY,t(9;22)         | 54.2                 | 12.9                 | 302                  | 4                           | 0 1                         | n.t.                          |
| 25           | 73                   | f                       | CP                               | 46,XX,t(9;22)         | 46.8                 | 8.8                  | 1060                 | 7                           | 1 1                         | n.t.                          |

| No. # | age (yrs) | gender (m/f) | diagnosis - CML phase | karyotype                     | WBC (G/L) | Hb (g/dL) | PLT (G/L) | basophils (%) PB | blasts (%) PB | BM   | BCR-ABL1 mutations |
|-------|-----------|--------------|-----------------------|-------------------------------|-----------|-----------|-----------|------------------|---------------|------|--------------------|
| 26    | 57        | m            | CP                    | 46,XY,t(9;22)                 | 271.5     | 9.2       | 607       | 8                | 2             | 2    | n.t.               |
| 27    | 33        | m            | CP                    | 46,XY,t(9;22)                 | 142.1     | 10.5      | 822       | 6                | 6             | 3    | n.t.               |
| 28    | 72        | m            | CP                    | 46,XY,t(9;22)                 | 179.1     | 11.1      | 83        | 4                | 1             | 2    | n.t.               |
| 29    | 84        | f            | BP                    | complex                       | 149.8     | 5.5       | 62        | 1                | 63            | 83   | n.t.               |
| 30    | 36        | f            | CP                    | 46,XX,t(9;10;22)              | 193.8     | 11.5      | 222       | 4                | 1             | 2    | n.t.               |
| 31    | 71        | m            | CP                    | 46,XY,t(9;22)                 | 52.5      | 15.0      | 340       | 4                | 2             | 2    | n.t.               |
| 32    | 57        | f            | CP                    | 46,XX,t(9;22)                 | 39.1      | 12.1      | 150       | 1                | 0             | 1    | n.t.               |
| 33    | 55        | m            | CP                    | 46,XY; (FISH: BCR-ABL)        | 33.7      | 12.9      | 417       | 5                | 0             | 4    | n.t.               |
| 34    | 29        | m            | CP                    | 46,XY,t(9;22)                 | 96.8      | 12.9      | 174       | 2                | 1             | 1    | n.t.               |
| 35    | 40        | m            | CP                    | 46,XY,t(9;22)                 | 13.0      | 13.9      | 601       | 1                | 0             | 1    | n.t.               |
| 36    | 38        | f            | CP                    | 46,XX,t(9;22)                 | 27.3      | 12.7      | 412       | 5                | 0             | 1    | n.t.               |
| 37    | 85        | m            | CP                    | 46,XY,t(9;22)                 | 45.7      | 12.4      | 330       | 2                | 1             | 2    | n.t.               |
| 38*   | 44        | m            | BP                    | n.t.                          | 74.0      | 8.0       | 33        | 33               | 44            | n.t. | E255K              |
| 39    | 63        | f            | CP                    | 46,XX,t(9;22)                 | 43.5      | 11.7      | 265       | 19               | 1             | 4    | n.t.               |
| 40*   | 74        | f            | BP                    | 46,XX,t(9;22)                 | 3.0       | 10.2      | 156       | n.t.             | 6             | 43   | none               |
| 41    | 46        | f            | CP                    | 46,XX,t(9;22)                 | 47.0      | 11.1      | 591       | 2                | 0             | 1    | n.t.               |
| 42    | 33        | m            | CP                    | 46,XY,t(9;22)                 | 190.7     | 9.7       | 750       | 4                | 3             | 8    | n.t.               |
| 43    | 35        | m            | AP                    | 46,XY,t(9;22)                 | 263       | 11.7      | 124       | 11               | 10            | 2    | none               |
| 44*   | 63        | f            | CP                    | 46,XX,t(9;22)                 | 36.8      | 11.5      | 105       | 2                | 0             | n.t. | V379I              |
| 45    | 28        | f            | CP                    | 46,XX,t(9;22)                 | 108.6     | 8.5       | 432       | 3                | 0             | 1    | n.t.               |
| 46    | 68        | f            | CP                    | 46,XX,t(9;22)                 | 40.2      | 12.1      | 413       | 5                | 0             | 2    | n.t.               |
| 47    | 27        | f            | AP                    | 46,XX,t(9;22)                 | 178.3     | 10.2      | 626       | 15               | 7             | 5    | n.t.               |
| 48*   | 75        | f            | CP                    | 47,XX,t(9;22),+der(22)t(9;22) | 6.6       | 11.4      | 286       | 1                | 0             | 1    | L248V              |
| 49    | 67        | f            | CP                    | 46,XX,t(9;22)                 | 37.6      | 10.5      | 1375      | 3                | 1             | 4    | n.t.               |
| 50    | 57        | f            | CP                    | n.t.                          | 143.7     | 11.5      | 204       | 4                | 3             | 4    | n.t.               |
| 51    | 60        | f            | CP                    | 46,XX,t(9;22)                 | 39.8      | 13.1      | 793       | 9                | 1             | 3    | n.t.               |
| 52    | 63        | m            | CP                    | 46,XY,t(9;22)                 | 46.5      | 11.8      | 419       | 4                | 1             | 2    | n.t.               |
| 53    | 84        | f            | CP                    | 46,XX,t(9;22)                 | 67.6      | 12.8      | 305       | 2                | 0             | 1    | n.t.               |

| No. # | age (yrs) | gender (m/f) | diagnosis - CML phase | karyotype              | WBC (G/L) | Hb (g/dL) | PLT (G/L) | basophils (%) PB | blasts (%) PB BM |      | BCR-ABL1 mutations |
|-------|-----------|--------------|-----------------------|------------------------|-----------|-----------|-----------|------------------|------------------|------|--------------------|
| 54    | 43        | m            | BP                    | 46,XY,t(9;22)          | 44.6      | 9         | 769       | 31               | 20               | 23   | n.t.               |
| 55    | 55        | f            | CP                    | 46,XX,t(9;22)          | 541.2     | 7.6       | 782       | 3                | 7                | 2    | n.t.               |
| 56*   | 48        | f            | BP                    | complex                | 71.0      | 11.9      | 49        | 0                | 34               | 11   | none               |
| 57    | 57        | m            | CP                    | 46,XY,t(9;22)          | 48.1      | 13.9      | 217       | 1                | 0                | 1    | n.t.               |
| 58    | 45        | f            | CP                    | n.t.                   | 31.9      | 12.9      | 411       | 3                | 0                | 1    | n.t.               |
| 59    | 67        | f            | CP                    | 46,XX,t(9;22)          | 332.2     | 10.3      | 568       | 4                | 4                | 4    | n.t.               |
| 60    | 47        | m            | CP                    | 46,XY,t(9;22)          | 55.7      | 13.9      | 250       | 1                | 1                | 3    | n.t.               |
| 61    | 59        | m            | CP                    | 46,XY,t(9;22)          | 222.1     | 10.5      | 789       | 8                | 1                | 2    | n.t.               |
| 62    | 75        | m            | CP                    | n.t.                   | 65.0      | 9.2       | 185       | 0                | 0                | 1    | n.t.               |
| 63    | 33        | m            | CP                    | 46,XY,t(9;22)          | 173.3     | 10.8      | 787       | 5                | 3                | 2    | n.t.               |
| 64    | 46        | m            | CP                    | 46,XY,t(9;22)          | 53.8      | 14        | 480       | 8                | 2                | 1    | n.t.               |
| 65    | 66        | m            | CP                    | 46,XY,t(9;22)          | 137.2     | 13.8      | 173       | 1                | 2                | 1    | n.t.               |
| 66    | 52        | m            | CP                    | 46,XY,t(9;22)          | 174.2     | 11.6      | 275       | 1                | 1                | 1    | n.t.               |
| 67*   | 45        | m            | AP                    | 46,XY,t(9;22)          | 31.1      | 9         | 306       | 0                | 6                | 4    | n.t.               |
| 68    | 28        | m            | CP                    | 46,XY,t(9;22)          | 23.7      | 13        | 209       | 1                | 0                | 1    | n.t.               |
| 69    | 43        | m            | CP                    | 46,XY; (FISH: BCR-ABL) | 76.1      | 14        | 151       | 2                | 2                | 4    | n.t.               |
| 70    | 34        | f            | CP                    | 46,XX,t(9;22)          | 396.9     | 7.2       | 425       | 6                | 2                | 1    | n.t.               |
| 71    | 72        | m            | CP                    | 46,XY,t(2;10),t(9;22)  | 112.5     | 11.9      | 394       | 13               | 6                | 4    | n.t.               |
| 72    | 60        | f            | BP                    | 46,XX,t(9;22)          | 94.4      | 10.9      | 45        | 1                | 35               | 75   | none               |
| 73    | 46        | f            | CP                    | 46,XX,t(9;22)          | 184.0     | 10.1      | 700       | 1                | 1                | 1    | n.t.               |
| 74    | 75        | f            | CP                    | 46,XX,t(9;22)          | 34.2      | 12.8      | 911       | 6                | 0                | 1    | n.t.               |
| 75    | 40        | f            | CP                    | 46,XX,t(9;22)          | 24.4      | 13        | 643       | 8                | 0                | 1    | n.t.               |
| 76    | 60        | f            | CP                    | 46,XX,t(9;22)          | 22.4      | 13.2      | 319       | 5                | 0                | 1    | n.t.               |
| 77    | 22        | f            | CP                    | 46,XX,t(9;22)          | 230.6     | 10.4      | 720       | 5                | 1                | 1    | n.t.               |
| 78*   | 69        | m            | AP                    | complex                | 1.7       | 9.5       | 112       | 7                | 4                | 8    | Q252H              |
| 79    | 86        | f            | AP                    | 46,XX,t(9;22)          | 230.0     | 8.9       | 783       | 4                | 11               | 3    | n.t.               |
| 80    | 64        | m            | CP                    | 46,XY,t(9;22)          | 23.9      | 13.3      | 164       | 1                | 0                | 1    | n.t.               |
| 81*   | 73        | m            | CP                    | n.t.                   | 169.5     | 7.8       | 205       | 3                | 2                | n.t. | n.t.               |

| No. # | age (yrs) | gender (m/f) | diagnosis - CML phase | karyotype            | WBC (G/L) | Hb (g/dL) | PLT (G/L) | basophils (%) PB | blasts (%) PB | BM   | BCR-ABL1 mutations |
|-------|-----------|--------------|-----------------------|----------------------|-----------|-----------|-----------|------------------|---------------|------|--------------------|
| 82    | 44        | f            | CP                    | 46,XX,t(9;22)        | 113.7     | 12.3      | 514       | 5                | 3             | 2    | n.t.               |
| 83    | 54        | m            | CP                    | complex              | 290.4     | 12.4      | 441       | 3                | 2             | 2    | n.t.               |
| 84*   | 23        | m            | CP                    | 47,XY,+8,t(9;22)     | 127.7     | 11.7      | 93        | 1                | 1             | 1    | none               |
| 85    | 65        | m            | CP                    | 46,XY,t(9;22)        | 38.4      | 11.8      | 311       | 5                | 0             | 1    | n.t.               |
| 86    | 33        | f            | CP                    | 46,XX,t(9;22)        | 38.7      | 13.2      | 732       | 8                | 1             | 1    | n.t.               |
| 87    | 67        | m            | CP                    | 46,XY,t(9;22)        | 37.8      | 14.5      | 114       | 7                | 1             | 1    | n.t.               |
| 88*   | 73        | f            | AP                    | n.t.                 | 23.4      | 8.3       | 69        | 1                | 5             | n.t. | none               |
| 89    | 48        | m            | CP                    | 46,XY,t(9;22)        | 315.9     | 10.8      | 190       | 5                | 2             | n.t. | n.t.               |
| 90    | 65        | m            | CP                    | 46,XY,t(9;22)        | 30.6      | 15.2      | 216       | 3                | 0             | 1    | n.t.               |
| 91    | 42        | f            | CP                    | 46,XX,t(9;22)        | 61.2      | 13.5      | 319       | 3                | 0             | 1    | n.t.               |
| 92    | 74        | m            | CP                    | 46,XY,t(9;22)        | 48.4      | 13.1      | 321       | 1                | 1             | 1    | n.t.               |
| 93*   | 76        | m            | CP                    | 46,XY,t(9;22)        | 17.5      | 12.7      | 595       | 4                | 0             | n.t. | F359V              |
| 94*   | 56        | f            | CP                    | 46,XX,t(9;22),i(17q) | 9.9       | 7.5       | 171       | 2                | 2             | 2    | E279K              |
| 95*   | 74        | f            | AP                    | 46,XX,t(9;22)        | 32.0      | 8.7       | 1150      | 10               | 1             | 1    | F317L              |
| 96    | 51        | m            | CP                    | 46,XY,t(9;22)        | 170.0     | 17        | 176       | 7                | 3             | 1    | n.t.               |
| 97    | 29        | f            | CP                    | 46,XX,t(9;22)        | 34.1      | 12.7      | 606       | 2                | 0             | 1    | n.t.               |

Abbreviations: No. #, patient number; WBC, white blood count; Hb, hemoglobin; Plt, platelet count; yrs, years; m, male; f, female; PB, peripheral blood; BM, bone marrow; G/L,  $10^9$  cells per liter; g/dL, gram per deciliter; CP, chronic phase; AP, accelerated phase; BP, blast phase; complex karyotype: t(9;22) and at least two additional cytogenetic aberrations; FISH: a cryptic BCR-ABL fusion gene was detected by fluorescence in situ hybridization; n.t., not tested.

\* These patients were analyzed at relapsed/refractory disease only and the patients' characteristics refer to the time of sampling.



**Table S3**

Patients' characteristics – acute myeloid leukemia (AML)

| No. # | age   | gender | sample  | AML diagnosis |                                                  | Mutations or                            |                           | WBC<br>(G/L) | Hb<br>(g/dL) | Plt<br>(G/L) | Blast (%) |    |
|-------|-------|--------|---------|---------------|--------------------------------------------------|-----------------------------------------|---------------------------|--------------|--------------|--------------|-----------|----|
|       | (yrs) | (m/f)  | used at | FAB           | WHO                                              | molecular<br>translocations             | karyotype                 |              |              |              | PB        | BM |
| 1     | 53    | m      | D,FU    | M1            | AML without maturation                           | none found                              | 47,XY,+13                 | 2.4          | 10.4         | 20           | 30        | 80 |
| 2     | 37    | f      | D       | M5a           | AML with mutated <i>NPM1</i>                     | <i>FLT3</i> ITD, <i>NPM1</i>            | 46,XX                     | 25.1         | 8.8          | 71           | 8         | 42 |
| 3     | 43    | f      | D       | M1            | AML with mutated <i>NPM1</i>                     | <i>FLT3</i> ITD, <i>NPM1</i>            | 46,XX                     | 65.1         | 7.7          | 46           | 72        | 72 |
| 4     | 51    | f      | D,FU    | M2            | AML with mutated <i>NPM1</i>                     | <i>NPM1</i>                             | 46,XX                     | 44.0         | 9.1          | 32           | 59        | 66 |
| 5     | 34    | m      | D,FU    | M4eo          | AML with inv(16)                                 | <i>CBFB-MYH11</i>                       | 46,XY,inv(16)             | 57.1         | 9.3          | 11           | 60        | 34 |
| 6     | 71    | f      | D       | M1            | AML with mutated <i>NPM1</i>                     | <i>NPM1</i>                             | 46,XX                     | 52.4         | 11.0         | 15           | 87        | 85 |
| 7     | 74    | f      | D,FU    | M0            | AML with myelodysplasia                          | none found                              | 46,XX,t(1;17;X),del(5q)   | 2.5          | 9.3          | 65           | 10        | 50 |
| 8     | 80    | f      | D       | M5a           | AML with mutated <i>NPM1</i>                     | <i>NPM1</i>                             | 47,XX,+8,add(21)/47,XX,+8 | 10.2         | 10.1         | 44           | 5         | 42 |
| 9     | 66    | f      | D,FU    | M2            | AML with mutated <i>NPM1</i>                     | <i>FLT3</i> ITD, <i>NPM1</i>            | 46,XX                     | 97.4         | 10.3         | 56           | 94        | 83 |
| 10    | 69    | m      | D       | M4            | AML with myelodysplasia                          | none found                              | complex, del(5q)          | 1.0          | 10.3         | 88           | 0         | 37 |
| 11    | 66    | f      | D       | M4            | AML with myelodysplasia                          | none found                              | complex, del(5q)          | 62.2         | 10.3         | 50           | 79        | 70 |
| 12    | 55    | m      | D       | M4            | AML with mutated <i>NPM1</i>                     | <i>NPM1</i>                             | 46,XY                     | 76.1         | 9.4          | 60           | 70        | 85 |
| 13    | 61    | f      | D,FU    | M2            | AML with mutated <i>NPM1</i>                     | <i>NPM1</i>                             | 46,XX                     | 1.3          | 10.2         | 73           | 3         | 41 |
| 14    | 71    | m      | D       | M2            | AML with maturation                              | <i>FLT3</i> ITD                         | 46,XY                     | 6.1          | 9.2          | 73           | 45        | 26 |
| 15    | 70    | m      | D       | M4            | AML with myelodysplasia                          | none found                              | 45,XY,-7                  | 13.7         | 6.6          | 39           | 18        | 24 |
| 16    | 54    | m      | D       | M1            | AML with mutated <i>NPM1</i>                     | <i>FLT3</i> ITD, <i>NPM1</i>            | 46,XY                     | 361.5        | 6.9          | 74           | 95        | 92 |
| 17    | 56    | m      | D       | M2            | AML with myelodysplasia                          | none found                              | complex                   | 18.7         | 9.2          | 142          | 13        | 33 |
| 18    | 69    | m      | D       | n.a.          | AML with myelodysplasia                          | none found                              | 46,XY                     | 3.2          | 8.0          | 1            | 0         | 65 |
| 19    | 49    | f      | D       | M4eo          | AML with inv(16)                                 | <i>CBFB-MYH11</i> ,<br><i>FLT3</i> D835 | 46,XX,inv(16)             | 94.2         | 8.1          | 15           | 47        | 57 |
| 20    | 72    | f      | D       | M2            | AML with mutated <i>NPM1</i> and<br><i>CEBPA</i> | <i>NPM1</i> , <i>CEBPA</i>              | 46,XX                     | 2.1          | 10.5         | 166          | 27        | 50 |
| 21    | 62    | f      | D       | M1            | AML without maturation                           | none found                              | 47,XX,+11                 | 2.8          | 12.1         | 158          | 77        | 60 |
| 22    | 64    | f      | D,FU    | M0            | AML with inv(3) or t(3;3)                        | none found                              | 46,XX,t(3;3)              | 60.2         | 9.2          | 13           | 77        | 90 |
| 23    | 77    | f      | D       | M4            | AML with mutated <i>NPM1</i>                     | <i>FLT3</i> ITD, <i>NPM1</i>            | 46,XX                     | 200.0        | 8.3          | 26           | 41        | 65 |

| No. # | age   | gender | sample  | AML diagnosis |                                  | Mutations or<br>molecular<br>translocations | karyotype             | WBC    | Hb    | Plt | Blast (%) |    |
|-------|-------|--------|---------|---------------|----------------------------------|---------------------------------------------|-----------------------|--------|-------|-----|-----------|----|
|       | (yrs) | (m/f)  | used at | FAB           | WHO                              | (G/L)                                       |                       | (g/dL) | (G/L) | PB  | BM        |    |
| 24    | 59    | m      | D       | M2            | Therapy-related AML with t(8;21) | <i>AML1-ETO</i>                             | 46,XY,t(8;21)         | 100.0  | 9.5   | 29  | 60        | 58 |
| 25    | 63    | m      | D       | n.a.          | AML with myelodysplasia          | <i>NPM-MLF1</i> ;<br>t(3;5)(q25.1;q34)      | complex               | 26.5   | 9.8   | 11  | 79        | 70 |
| 26    | 69    | m      | D       | M4            | AML with myelodysplasia          | none found                                  | 46,XY                 | 3.5    | 9.0   | 118 | 0         | 20 |
| 27    | 59    | m      | FU      | M5a           | AML with myelodysplasia          | none found                                  | complex, del(5q)      | 1.0    | 7.9   | 43  | 0         | 9  |
| 28    | 52    | m      | D,FU    | M2            | AML with t(8;21)                 | <i>AML1-ETO</i>                             | 45,X,-Y,del7q,t(8;21) | 51.8   | 7.3   | 17  | 88        | 70 |
| 29    | 26    | m      | D       | M4            | Acute myelomonocytic leukemia    | none found                                  | 46,XY                 | 2.3    | 11.4  | 159 | 1         | 37 |
| 30    | 64    | m      | D       | n.a.          | AML with myelodysplasia          | none found                                  | 46,XY                 | 1.8    | 8.2   | 12  | 0         | 26 |
| 31    | 78    | f      | FU      | M4            | Acute myelomonocytic leukemia    | none found                                  | 46,XX                 | 26.1   | 10.9  | 7   | 4         | 23 |
| 32    | 53    | f      | D       | M0            | AML with minimal differentiation | none found                                  | 46,XX                 | 0.4    | 8.2   | 104 | 0         | 75 |
| 33    | 24    | m      | D       | M0            | AML with myelodysplasia          | none found                                  | complex               | 2.4    | 11.1  | 332 | 7         | 25 |
| 34    | 65    | m      | D       | M4eo          | AML with inv(16)                 | <i>CBFB-MYH11A</i> ,<br><i>KIT</i> D816V    | 46,XY,inv(16)         | 51.8   | 8.6   | 16  | 33        | 22 |
| 35    | 56    | m      | D       | M2            | AML with t(8;21)                 | <i>AML1-ETO</i> ,<br>t(8;21)(q22;q22)       | 46,XY,t(8;21)         | 6.8    | 11.1  | 53  | 27        | 58 |
| 36    | 63    | f      | D       | M4            | AML with myelodysplasia          | none found                                  | complex, del(5q)      | 1.0    | 8.9   | 71  | 21        | 57 |
| 37    | 57    | f      | D       | M4eo          | AML with inv(16)                 | <i>CBFB-MYH11</i>                           | 46,XX,inv(16)         | 27.6   | 10.0  | 20  | 56        | 65 |
| 38    | 69    | f      | D       | M2            | AML with myelodysplasia          | none found                                  | complex               | 1.5    | 8.6   | 49  | 11        | 22 |
| 39    | 36    | f      | FU      | M6            | AML with myelodysplasia          | <i>FLT3</i> ITD, <i>NPM1</i>                | 46,XX                 | 5.0    | 10.0  | 128 | 39        | 65 |
| 40    | 53    | m      | FU      | M6            | AML with myelodysplasia          | none found                                  | complex               | 2.6    | 7.5   | 97  | 11        | 22 |
| 41    | 67    | m      | D       | M4            | AML with myelodysplasia          | none found                                  | 45,XY,-7              | 84.5   | 11.4  | 121 | 4         | 28 |
| 42    | 51    | m      | D       | M1            | AML without maturation           | none found                                  | 46,XY                 | 0.7    | 8.8   | 30  | 8         | 73 |
| 43    | 27    | m      | FU      | M4            | Acute myelomonocytic leukemia    | none found                                  | 46,XY                 | 0.9    | 11.6  | 14  | 19        | 77 |
| 44    | 42    | m      | D,FU    | M3            | Acute promyelocytic              | <i>PML-RARA</i>                             | 46,XY,t(15;17)        | 6.3    | 14.9  | 18  | 22        | 88 |

| No. # | age   | gender | sample  | AML diagnosis |                                  | Mutations or             | karyotype                | WBC   | Hb     | Plt   | Blast (%) |    |
|-------|-------|--------|---------|---------------|----------------------------------|--------------------------|--------------------------|-------|--------|-------|-----------|----|
|       | (yrs) | (m/f)  | used at | FAB           | WHO                              | molecular translocations |                          | (G/L) | (g/dL) | (G/L) | PB        | BM |
|       |       |        |         |               | leukemia                         |                          |                          |       |        |       |           |    |
| 45    | 62    | f      | D,FU    | n.a.          | AML with myelodysplasia          | <i>CEBPA</i>             | 46,XX,del(13q)/45,XX,-13 | 2.2   | 9.2    | 40    | 0         | 24 |
| 46    | 65    | f      | D,FU    | M1            | AML with mutated <i>CEBPA</i>    | <i>CEBPA</i>             | 46,XX                    | 25.8  | 9.7    | 14    | 89        | 80 |
| 47    | 36    | m      | D       | M4            | AML with mutated <i>NPM1</i>     | <i>NPM1</i>              | 46,XY                    | 93.9  | 8.9    | 50    | 37        | 64 |
| 48    | 38    | m      | D       | M5a           | AML with myelodysplasia          | none found               | complex                  | 13.4  | 7.9    | 108   | 96        | 75 |
| 49    | 65    | m      | D,FU    | M1            | AML without maturation           | none found               | 46,XY                    | 2.9   | 9.3    | 56    | 40        | 88 |
| 50    | 65    | f      | D       | M1            | AML without maturation           | none found               | 46,XX                    | 1.3   | 10.8   | 108   | 28        | 66 |
| 51    | 78    | m      | D       | n.a.          | AML with myelodysplasia          | none found               | 45,XY,-7                 | 53.1  | 10.3   | 20    | 51        | 40 |
| 52    | 79    | m      | D       | M2            | AML with maturation              | none found               | 46,XY                    | 52.4  | 11.6   | 65    | 72        | 60 |
| 53    | 65    | f      | D       | M0            | AML with myelodysplasia          | none found               | 46,XX                    | 2.0   | 10.5   | 31    | 21        | 78 |
| 54    | 74    | m      | D,FU    | M1            | AML with myelodysplasia          | none found               | complex, 5q-,7q-         | 1.6   | 9.0    | 17    | 16        | 25 |
| 55    | 56    | m      | D       | M1            | AML with mutated <i>NPM1</i>     | <i>NPM1</i>              | 46,XY                    | 127.4 | 8.5    | 307   | 95        | 96 |
| 56    | 70    | f      | D       | M2            | AML with myelodysplasia          | none found               | 46,XX,t(1;6)             | 2.4   | 2.6    | 2     | 0         | 23 |
| 57    | 71    | f      | D       | M0            | AML with minimal differentiation | none found               | 46,XX                    | 2.4   | 10.8   | 208   | 48        | 84 |
| 58    | 68    | m      | FU      | M6            | Acute erythroid leukemia         | none found               | 46,XY                    | 4.4   | 12.1   | 81    | 0         | 22 |
| 59    | 65    | m      | D       | n.a.          | AML with myelodysplasia          | <i>KIT</i> D816V         | 47,XY,+8                 | 6.6   | 8.2    | 20    | 13        | 85 |
| 60    | 66    | f      | D       | n.a.          | AML with myelodysplasia          | none found               | 46,XX                    | 1.3   | 9.0    | 85    | 0         | 20 |
| 61    | 58    | m      | D       | n.a.          | Therapy-related AML              | none found               | 46,XY                    | 1.7   | 8.8    | 34    | 0         | 20 |
| 62    | 40    | f      | D       | M4            | AML with mutated <i>NPM1</i>     | <i>NPM1</i>              | 46,XX                    | 18.6  | 10.3   | 91    | 16        | 28 |
| 63    | 83    | f      | D       | M6            | Acute erythroid leukemia         | none found               | n.t.                     | 1.8   | 9.2    | 912   | 3         | 27 |
| 64    | 53    | f      | D       | M4            | Therapy related AML              | none found               | complex                  | 2.0   | 11.4   | 10    | 2         | 25 |
| 65    | 82    | m      | D       | M0            | AML with myelodysplasia          | <i>FLT3</i> ITD          | 46,XY,del(5q)            | 6.7   | 8.2    | 74    | 23        | 60 |
| 66    | 55    | f      | D       | M2            | AML with myelodysplasia          | <i>NPM1</i>              | 46,XX                    | 10.3  | 7.7    | 39    | 28        | 24 |
| 67    | 72    | m      | D       | M2            | AML with myelodysplasia          | none found               | 47,XY,+8                 | 1.9   | 10.2   | 62    | 1         | 47 |
| 68    | 75    | m      | D       | n.a.          | AML with myelodysplasia          | <i>JAK2</i> V617F        | 47,XY,+mar               | 20.7  | 8.2    | 480   | 28        | 21 |
| 69    | 67    | m      | D       | M2            | AML with mutated <i>CEBPA</i>    | <i>CEBPA</i>             | 46,XY                    | 77.9  | 13.9   | 193   | 81        | 71 |
| 70    | 59    | m      | D       | M4            | AML with mutated <i>NPM1</i>     | <i>NPM1</i>              | 46,XY                    | 6.1   | 8.6    | 212   | 21        | 40 |

| No. # | age   | gender | sample  | AML diagnosis |                                  | Mutations or                         | WBC                       | Hb    | Plt  | Blast (%) |       |        |
|-------|-------|--------|---------|---------------|----------------------------------|--------------------------------------|---------------------------|-------|------|-----------|-------|--------|
|       | (yrs) | (m/f)  | used at | FAB           | WHO                              | molecular translocations             |                           |       |      | karyotype | (G/L) | (g/dL) |
| 71    | 21    | m      | D       | M1            | AML without maturation           | none found                           | 46,XY,add(17p)            | 133.2 | 9.5  | 28        | 95    | 88     |
| 72    | 54    | f      | D       | M1            | AML without maturation           | none found                           | n.t.                      | 1.2   | 11.1 | 271       | 0     | 71     |
| 73    | 56    | f      | D       | M4            | Acute myelomonocytic leukemia    | none found                           | 47,XX,+der(11)            | 55.7  | 9.5  | 61        | 28    | 55     |
| 74    | 49    | f      | D       | M5a           | AML with mutated <i>NPM1</i>     | <i>NPM1</i>                          | 47,XX,+8                  | 12.1  | 11.8 | 97        | 42    | 75     |
| 75    | 79    | f      | D       | M1            | AML without maturation           | none found                           | 48,XX,+8,+21              | 4.3   | 8.3  | 191       | 77    | n.t.   |
| 76    | 71    | f      | D       | M2            | AML with myelodysplasia          | none found                           | complex, del(5q)          | 5.3   | 9.5  | 159       | 20    | 62     |
| 77    | 60    | m      | D       | M1            | AML with myelodysplasia          | none found                           | 46,XY,del(13q)            | 1.7   | 12.4 | 112       | 0     | 60     |
| 78    | 65    | m      | D       | M4            | AML with myelodysplasia          | none found                           | 47,XY,+8                  | 72.4  | 12.5 | 129       | 2     | 55     |
| 79    | 54    | m      | D       | M2            | AML with t(8;21)                 | <i>AML1-ETO</i>                      | 45,X,-Y,t(8;21)           | 14.0  | 7.5  | 13        | 22    | 23     |
| 80    | 73    | m      | D,FU    | M5a           | AML with mutated <i>NPM1</i>     | <i>NPM1</i>                          | 46,XY                     | 50.0  | 7.8  | 143       | 29    | 78     |
| 81    | 59    | m      | FU      | n.a.          | AML with myelodysplasia          | none found                           | 47,XY,add(3),+8           | 34.3  | 10.4 | 7         | 26    | n.t.   |
| 82    | 51    | f      | D       | M4            | AML with myelodysplasia          | none found                           | complex                   | 90.0  | 8.7  | 79        | 60    | 70     |
| 83    | 61    | f      | D       | M3            | Acute promyelocytic leukemia     | <i>PML-RARA</i> ,<br><i>FLT3</i> ITD | 45,XX,der(15)t(15;17),-17 | 1.0   | 11.8 | 122       | 3     | 81     |
| 84    | 63    | f      | FU      | M1            | AML with mutated <i>NPM1</i>     | <i>FLT3</i> ITD, <i>NPM1</i>         | 46,XX                     | 33.8  | 10.0 | 25        | 95    | 94     |
| 85    | 74    | m      | D       | M0            | AML with minimal differentiation | none found                           | 46,XY                     | 13.9  | 11.2 | 206       | 51    | 80     |
| 86    | 68    | m      | D,FU    | M1            | AML without maturation           | none found                           | 46,XY                     | 24.4  | 7.3  | 41        | 17    | 20     |
| 87    | 54    | f      | D       | M1            | AML without maturation           | none found                           | 47,XX,+8                  | 0.5   | 8.4  | 28        | 20    | 72     |
| 88    | 39    | f      | D,FU    | M2            | AML with t(8;21)                 | <i>KIT</i> D816V,<br><i>AML1-ETO</i> | 47,XX,+4,t(8;21)          | 9.2   | 9.6  | 17        | 30    | 65     |
| 89    | 73    | m      | D       | M2            | AML with mutated <i>CEBPA</i>    | <i>CEBPA</i>                         | 46,XY                     | 2.0   | 14.9 | 17        | 10    | 33     |
| 90    | 38    | f      | D       | M4            | Acute myelomonocytic leukemia    | <i>FLT3</i> D835                     | 46,XX                     | 45.2  | 9.0  | 69        | 11    | 45     |
| 91    | 71    | m      | D,FU    | M4            | Acute myelomonocytic leukemia    | none found                           | 46,XY                     | 33.2  | 9.8  | 24        | 26    | 43     |
| 92    | 75    | f      | D       | M5b           | Acute monocytic leukemia         | <i>JAK2</i> V617F                    | 46,XX                     | 77.9  | 9.5  | 22        | 2     | 66     |
| 93    | 55    | m      | D       | n.a.          | AML with myelodysplasia          | none found                           | 46,XY,t(10;11)            | 44.4  | 10.0 | 76        | 16    | 30     |

| No. # | age   | gender | sample  | AML diagnosis |                                  | Mutations or                 | karyotype       | WBC   | Hb     | Plt   | Blast (%) |      |
|-------|-------|--------|---------|---------------|----------------------------------|------------------------------|-----------------|-------|--------|-------|-----------|------|
|       | (yrs) | (m/f)  | used at | FAB           | WHO                              | molecular translocations     |                 | (G/L) | (g/dL) | (G/L) | PB        | BM   |
| 94    | 25    | f      | D       | M3            | Acute promyelocytic leukemia     | <i>PML-RARA</i>              | 46,XX,t(15;17)  | 7.5   | 9.7    | 26    | 47        | 90   |
| 95    | 85    | f      | D       | M4            | Acute myelomonocytic leukemia    | none found                   | 46,XX           | 132.0 | 10.0   | 57    | 8         | 29   |
| 96    | 67    | m      | D       | M2            | AML with t(8;21)                 | <i>AML1-ETO</i>              | 46,XY,t(8;21)   | 1.4   | 8.5    | 54    | 35        | 53   |
| 97    | 67    | m      | D       | n.a.          | AML with myelodysplasia          | none found                   | 46,XY           | 1.8   | 11.6   | 144   | 0         | 40   |
| 98    | 76    | m      | D       | M2            | AML with myelodysplasia          | <i>FLT3</i> ITD              | 48,XY,+8,+14    | 3.3   | 10.4   | 35    | 18        | 28   |
| 99    | 70    | f      | D       | M1            | AML with myelodysplasia          | none found                   | 46,XX           | 0.3   | 10.0   | 176   | n.t.      | 22   |
| 100   | 62    | m      | FU      | n.a.          | AML with myelodysplasia          | none found                   | 46,XY           | 1.2   | 11.2   | 6     | 75        | 70   |
| 101   | 62    | m      | D       | M4            | AML with myelodysplasia          | none found                   | complex         | 7.3   | 9.8    | 44    | 10        | 65   |
| 102   | 67    | m      | D       | n.a.          | AML with myelodysplasia          | <i>FLT3</i> ITD              | 46,XY           | 13.1  | 5.9    | 29    | 63        | 50   |
| 103   | 62    | f      | D,FU    | M1            | AML with myelodysplasia          | <i>FLT3</i> ITD, <i>NPM1</i> | 46,XX           | 4.7   | 11.3   | 116   | 19        | 62   |
| 104   | 56    | m      | D,FU    | M4eo          | AML with inv(16)                 | <i>CBFB-MYH11</i>            | 46,XY           | 14.9  | 10.5   | 48    | 43        | 57   |
| 105   | 78    | m      | D       | n.a.          | AML with myelodysplasia          | none found                   | complex         | 40.6  | 8.8    | 21    | 50        | 45   |
| 106   | 50    | m      | D,FU    | M2            | AML with t(8;21)                 | <i>AML1-ETO</i>              | 45,X,-Y,t(8;21) | 4.6   | 5.9    | 18    | 35        | 63   |
| 107   | 57    | m      | FU      | n.a.          | AML, NOS                         | none found                   | 46,XY,dup(1q)   | 2.0   | 8.9    | 18    | 0         | 12   |
| 108   | 83    | m      | D       | M0            | AML with minimal differentiation | none found                   | 46,XY           | 116.9 | 6.1    | 12    | 81        | 85   |
| 109   | 51    | f      | D       | M1            | AML without maturation           | none found                   | 47,XX,+8        | 2.4   | 7.7    | 11    | 19        | 82   |
| 110   | 45    | m      | FU      | M2            | AML with myelodysplasia          | <i>FLT3</i> ITD, <i>NPM1</i> | 46,XY           | 1.6   | 13.1   | 86    | 0         | 60   |
| 111   | 38    | m      | D,FU    | M4            | AML with mutated <i>NPM1</i>     | <i>NPM1</i>                  | 46,XY           | 14.0  | 11.1   | 87    | 11        | 24   |
| 112   | 77    | f      | D       | n.a.          | AML with myelodysplasia          | none found                   | complex         | 1.3   | 7.4    | 53    | 0         | 23   |
| 113   | 73    | m      | D       | M4            | Acute myelomonocytic leukemia    | <i>FLT3</i> D835             | 46,XY,+11,-16   | 69.0  | 10.6   | 44    | 59        | 60   |
| 114   | 28    | m      | D       | M2            | AML with t(8;21)                 | <i>AML1-ETO</i>              | 45,X,-Y         | 11.5  | 9.9    | 68    | 24        | 20   |
| 115   | 48    | m      | D       | M2            | AML with maturation              | none found                   | 46,XY           | 11.8  | 8.4    | 576   | 42        | 27   |
| 116   | 71    | m      | D       | M1            | AML with mutated <i>NPM1</i>     | <i>FLT3</i> ITD, <i>NPM1</i> | n.t.            | 152.3 | 9.1    | 22    | 96        | n.t. |
| 117   | 66    | f      | FU      | M4eo          | AML with inv(16)                 | <i>CBFB-MYH11</i>            | 46,XX,inv(16)   | 3.3   | 12.2   | 72    | 5         | 19   |

| No. # | age   | gender | sample  | AML diagnosis |                                   | Mutations or molecular translocations |                           | WBC   | Hb     | Plt   | Blast (%) |      |
|-------|-------|--------|---------|---------------|-----------------------------------|---------------------------------------|---------------------------|-------|--------|-------|-----------|------|
|       | (yrs) | (m/f)  | used at | FAB           | WHO                               |                                       | karyotype                 | (G/L) | (g/dL) | (G/L) | PB        | BM   |
| 118   | 83    | m      | D       | M2            | AML with myelodysplasia           | none found                            | 47,XY,+8                  | 8.1   | 9.1    | 28    | 21        | 24   |
| 119   | 68    | f      | D       | M1            | AML with mutated <i>NPM1</i>      | <i>FLT3</i> ITD, <i>NPM1</i>          | n.t.                      | 198.1 | 9.2    | 14    | 90        | 91   |
| 120   | 74    | f      | D       | M4            | Therapy-related AML               | <i>FLT3</i> ITD                       | 46,XX                     | 109.5 | 9.2    | 67    | 37        | 70   |
| 121   | 65    | f      | FU      | M0            | AML with minimal differentiation  | n.t.                                  | 47,XX,t(3;12),+8          | 0.6   | 10.9   | 10    | n.t.      | 88   |
| 122   | 68    | f      | D       | M2            | AML with myelodysplasia           | none found                            | 49,XX,+8,+12,+13          | 7.4   | 9.8    | 5     | 72        | 30   |
| 123   | 77    | m      | D       | M2            | Therapy-related AML               | none found                            | 46,XY                     | 4.9   | 11.1   | 61    | 32        | 37   |
| 124   | 43    | m      | D       | M2            | AML with mutated <i>NPM1</i>      | <i>NPM1</i>                           | 46,XY                     | 135.7 | 12.5   | 54    | 50        | 49   |
| 125   | 49    | f      | FU      | M0            | AML with minimal differentiation  | <i>TLS-ERG</i>                        | 46,XX,t(16;21;13)         | 7.4   | 13.3   | 242   | 1         | 5    |
| 126   | 73    | f      | D       | M4            | Therapy-related AML               | <i>FLT3</i> ITD, <i>NPM1</i>          | 46,XX                     | 93.2  | 8.1    | 90    | 62        | 62   |
| 127   | 54    | f      | D       | M5a           | AML with mutated <i>NPM1</i>      | <i>FLT3</i> ITD, <i>NPM1</i>          | 46,XX                     | 144.2 | 10.3   | 62    | 96        | 95   |
| 128   | 62    | m      | D       | M4            | AML with t(11;17), <i>MLL-MSF</i> | <i>MLL1-MSF</i>                       | 47,XY,t(11;17)            | 35.1  | 11.3   | 32    | 33        | 72   |
| 129   | 41    | m      | D,FU    | M3            | Acute promyelocytic leukemia      | <i>PML-RARA</i>                       | 46,XY,t(15;17)            | 54.0  | 11.1   | 23    | 88        | 90   |
| 130   | 55    | m      | D,FU    | M2            | AML with maturation               | <i>FLT3</i> ITD                       | 47,XY,+8                  | 6.8   | 12.0   | 112   | 56        | 66   |
| 131   | 54    | f      | D,FU    | M2            | AML with myelodysplasia           | none found                            | complex, del(5q), del(7q) | 2.4   | 9.4    | 55    | 1         | 21   |
| 132   | 44    | f      | D       | n.a.          | AML with myelodysplasia           | none found                            | 45,XX,inv(3),-7           | 1.5   | 9.3    | 13    | 16        | 25   |
| 133   | 78    | m      | FU      | M4            | AML with mutated <i>NPM1</i>      | <i>FLT3</i> ITD, <i>NPM1</i>          | 46,XY                     | 91.6  | 8.8    | 33    | 93        | 81   |
| 134   | 34    | f      | D       | M5a           | AML with mutated <i>NPM1</i>      | <i>NPM1</i>                           | 46,XX                     | 30.8  | 9.6    | 41    | 5         | 70   |
| 135   | 83    | f      | D       | M1            | AML with myelodysplasia           | n.t.                                  | 47,XX,del(5q),+8          | 1.2   | 8.0    | 151   | 5         | 60   |
| 136   | 39    | f      | D       | M2            | AML with maturation               | none found                            | 46,XX                     | 19.9  | 11.7   | 87    | 82        | 81   |
| 137   | 68    | m      | D       | n.a.          | AML with myelodysplasia           | none found                            | complex                   | 2.2   | 8.2    | 34    | 0         | 34   |
| 138   | 65    | f      | D       | M6            | Acute erythroid leukemia          | <i>FLT3</i> ITD                       | 46,XX                     | 2.5   | 9.6    | 189   | 1         | 30   |
| 139   | 64    | f      | D       | n.a.          | AML with myelodysplasia           | <i>JAK2</i> V617F                     | n.t.                      | 10.3  | 10.7   | 352   | 24        | n.t. |
| 140   | 43    | f      | FU      | M1            | AML without maturation            | none found                            | 46,XX                     | 2.4   | 10.9   | 168   | 0         | 14   |
| 141   | 21    | f      | D       | M4eo          | AML with inv(16)                  | <i>CBFB-MYH11</i>                     | 46,XX,inv(16)             | 192.9 | 8.4    | 18    | 78        | 86   |
| 142   | 76    | m      | D       | n.a.          | AML with myelodysplasia           | none found                            | 46,XY                     | 1.9   | 12.4   | 111   | 0         | 21   |

| No. # | age   | gender | sample  | AML diagnosis |                                               | Mutations or molecular translocations          |                                          | WBC   | Hb     | Plt   | Blast (%) |      |
|-------|-------|--------|---------|---------------|-----------------------------------------------|------------------------------------------------|------------------------------------------|-------|--------|-------|-----------|------|
|       | (yrs) | (m/f)  | used at | FAB           | WHO                                           |                                                | karyotype                                | (G/L) | (g/dL) | (G/L) | PB        | BM   |
| 143   | 71    | m      | D       | M6            | Acute erythroid leukemia                      | none found                                     | 48,XY,+8,+15                             | 3.9   | 6.8    | 145   | 28        | 48   |
| 144   | 49    | m      | FU      | n.a.          | AML with myelodysplasia                       | none found                                     | 46,XY                                    | 2.0   | 14.8   | 41    | 1         | 22   |
| 145   | 85    | f      | D       | M1            | AML with myelodysplasia                       | none found                                     | 46,XX,del(5q)                            | 1.7   | 11.1   | 101   | 0         | 33   |
| 146   | 39    | f      | FU      | M2            | AML with maturation                           | n.t.                                           | 46,XX                                    | 1.7   | 10.5   | 29    | 6         | 27   |
| 147   | 68    | m      | D       | M0            | AML with minimal differentiation              | none found                                     | 46,XY                                    | 1.8   | 6      | 38    | 1         | 46   |
| 148   | 64    | f      | D       | M4            | AML with myelodysplasia                       | <i>FLT3</i> ITD                                | 46,XX,del(9q)                            | 63.9  | 8.2    | 36    | 28        | 79   |
| 149   | 72    | m      | D       | M6            | AML with myelodysplasia                       | none found                                     | complex with (del5q)                     | 2.7   | 7.2    | 86    | 1         | 30   |
| 150   | 62    | m      | D       | n.a.          | AML with myelodysplasia                       | none found                                     | complex                                  | 1.6   | 9.6    | 31    | 2         | 30   |
| 151   | 67    | m      | D       | M1            | AML with myelodysplasia                       | <i>JAK2</i> V617F,<br><i>FLT3</i> ITD          | 46,XY                                    | 38.4  | 9.1    | 12    | 78        | 69   |
| 152   | 28    | f      | FU      | M1            | AML without maturation                        | none found                                     | 46,XX                                    | 4.0   | 12.0   | 114   | 10        | 37   |
| 153   | 70    | m      | D       | M2            | AML with myelodysplasia                       | none found                                     | 46,XY,+mar                               | 1.3   | 7.0    | 95    | 0         | 1    |
| 154   | 36    | f      | D       | M4            | AML with mutated <i>NPM1</i>                  | <i>FLT3</i> ITD, <i>NPM1</i>                   | 46,XX                                    | 26.2  | 8.2    | 82    | 5         | 40   |
| 155   | 80    | m      | D       | n.a.          | AML, NOS                                      | none found                                     | 46,XY                                    | 2.5   | 9.4    | 47    | 17        | 38   |
| 156   | 83    | m      | D       | M2            | AML with myelodysplasia                       | none found                                     | complex                                  | 1.4   | 8.0    | 43    | 5         | 23   |
| 157   | 50    | f      | D,FU    | M4            | AML with mutated <i>NPM1</i> and <i>CEBPA</i> | <i>FLT3</i> ITD, <i>NPM1</i> ,<br><i>CEBPA</i> | 46,XX                                    | 15.4  | 7.3    | 68    | 16        | 63   |
| 158   | 73    | f      | D       | M2            | AML with myelodysplasia                       | none found                                     | 46,XX,7,+mar,del(20q)/<br>46,XX,del(20q) | 70.6  | 9.8    | 19    | 77        | 50   |
| 159   | 57    | m      | D       | M1            | AML without maturation                        | <i>FLT3</i> ITD                                | 46,XY                                    | 72.6  | 8.5    | 91    | 80        | 73   |
| 160   | 46    | f      | D       | M1            | AML with t(10;11), <i>MLL-AF10</i>            | <i>MLL1-AF10</i>                               | 46,XX,t(8;12)                            | 25.0  | 8.1    | 35    | 81        | 93   |
| 161   | 92    | m      | D       | M0            | AML with minimal differentiation              | <i>FLT3</i> ITD                                | n.t.                                     | 107.0 | 10.3   | 63    | 70        | 80   |
| 162   | 50    | m      | D       | M3            | Acute promyelocytic leukemia                  | <i>PML-RARA</i>                                | n.t.                                     | 0.9   | 11.9   | 61    | 2         | n.t. |
| 163   | 78    | m      | D       | n.a.          | AML with myelodysplasia                       | none found                                     | 46,XY,t(X;2)/47,XY,t(2;X),+9             | 9.0   | 9.5    | 24    | 89        | 63   |
| 164   | 71    | f      | D       | M2            | AML with myelodysplasia                       | none found                                     | 46,XX                                    | 10.5  | 10.0   | 24    | 6         | 33   |
| 165   | 63    | m      | D       | M1            | AML with inv(16)                              | <i>CBFB-MYH11</i>                              | 46,XY,inv(16)                            | 27.5  | 9.0    | 22    | 65        | 64   |

| No. # | age   | gender | sample  | AML diagnosis |                                   | Mutations or                       | WBC                  | Hb    | Plt  | Blast (%) |       |        |
|-------|-------|--------|---------|---------------|-----------------------------------|------------------------------------|----------------------|-------|------|-----------|-------|--------|
|       | (yrs) | (m/f)  | used at | FAB           | WHO                               | molecular translocations           |                      |       |      | karyotype | (G/L) | (g/dL) |
| 166   | 71    | m      | FU      | M4            | AML with myelodysplasia           | none found                         | 46,XY                | 17.8  | 11.4 | 56        | 2     | 22     |
| 167   | 62    | m      | D       | M2            | AML with myelodysplasia           | <i>JAK2</i> V617F,<br><i>CEBPA</i> | 46,XY,-18,+mar       | 17.4  | 10.8 | 560       | 41    | 32     |
| 168   | 64    | m      | D,FU    | M1            | AML without maturation            | none found                         | 46,XY                | 53.5  | 9.0  | 52        | 94    | 84     |
| 169   | 70    | m      | D       | M2            | AML with maturation               | none found                         | 46,XY                | 1.9   | 9.1  | 36        | 0     | 37     |
| 170   | 56    | m      | D,FU    | M5b           | Acute monocytic leukemia          | none found                         | 46,XY                | 1.7   | 9.3  | 90        | 6     | 35     |
| 171   | 76    | m      | D,FU    | M2            | AML with maturation               | none found                         | 47,XY,+8             | 21.7  | 7.3  | 15        | 79    | 40     |
| 172   | 33    | f      | FU      | M1            | AML with t(9;11), <i>MLL1-AF9</i> | <i>MLL1-AF9</i>                    | 46,XX,t(9;11)        | 0.4   | 7.5  | 16        | n.t.  | 73     |
| 173   | 60    | m      | D       | M2            | AML with myelodysplasia           | none found                         | 46,XY                | 3.4   | 11.4 | 50        | 38    | 55     |
| 174   | 49    | f      | FU      | M2            | AML with maturation               | n.t.                               | 46,XX,add(17q)       | 37.4  | 9.3  | 23        | 95    | 90     |
| 175   | 66    | m      | D       | M5a           | Acute monoblastic leukemia        | none found                         | 46,XY                | 30.8  | 10.5 | 26        | 1     | n.t.   |
| 176   | 88    | m      | D       | M6            | Acute erythroid leukemia          | none found                         | complex              | 3.6   | 8.4  | 124       | 1     | 21     |
| 177   | 82    | f      | D       | M2            | AML with mutated <i>NPM1</i>      | <i>FLT3</i> ITD, <i>NPM1</i>       | 46,XX                | 112.9 | 9.5  | 54        | 73    | 75     |
| 178   | 50    | m      | D       | n.a.          | n.t.                              | n.t.                               | n.t.                 | 330.0 | 7.3  | 100       | 67    | n.t.   |
| 179   | 71    | m      | D       | n.a.          | AML with t(6;11), <i>MLL1-AF6</i> | <i>MLL1-AF6</i>                    | 46,XY,t(6;11)        | 312.0 | 11.4 | 94        | 77    | nA     |
| 180   | 66    | f      | D       | M4            | AML with myelodysplasia           | <i>FLT3</i> ITD                    | 46,XX                | 4.2   | 9.4  | 14        | 0     | 19     |
| 181   | 76    | m      | D       | M4            | AML with myelodysplasia           | <i>TP53</i> , <i>BCR-ABL</i>       | complex with del(5q) | 3.6   | 6.5  | 151       | 33    | 50     |
| 182   | 71    | f      | D       | M1            | AML with mutated <i>NPM1</i>      | <i>FLT3</i> ITD, <i>NPM1</i>       | 46,XX                | 33.1  | 10.0 | 9         | 44    | 75     |
| 183   | 69    | m      | D       | M2            | AML with myelodysplasia           | none found                         | complex (5q,-,7)     | 8.2   | 9.6  | 126       | 28    | 17     |
| 184   | 50    | f      | FU      | M4            | AML with mutated <i>NPM1</i>      | <i>NPM1</i> , <i>FLT3</i> ITD      | 46,XX                | 75.6  | 12.7 | 158       | 81    | 79     |
| 185   | 38    | f      | D,FU    | M3            | Acute promyelocytic leukemia      | <i>PML-RARA</i>                    | 46,XX,t(15;17)       | 5.1   | 9.8  | 22        | 37    | 73     |
| 186   | 71    | m      | FU      | M1            | AML with myelodysplasia           | none found                         | 45,XY,-7             | 1.4   | 11.1 | 43        | 7     | 56     |
| 187   | 53    | f      | D,FU    | M1            | AML with mutated <i>NPM1</i>      | <i>NPM1</i>                        | 46,XX                | 64.1  | 8.5  | 39        | 88    | 80     |
| 188   | 51    | f      | D       | M1            | AML without maturation            | <i>FLT3</i> ITD                    | 46,XX                | 55.9  | 9.4  | 33        | 94    | 94     |
| 189   | 36    | f      | D       | M2            | AML with myelodysplasia           | <i>FLT3</i> ITD                    | 46,XX,del(3)         | 5.2   | 8.7  | 8         | 41    | 56     |
| 190   | 44    | f      | D       | M1            | AML with mutated <i>NPM1</i>      | <i>FLT3</i> ITD, <i>NPM1</i>       | 46,XX                | 219.8 | 5.1  | 38        | 94    | 83     |
| 191   | 76    | f      | D       | n.a.          | AML with myelodysplasia           | <i>FLT3</i> ITD                    | 46,XX,del(5q)        | 20.1  | 12.1 | 206       | 36    | 49     |



| No. # | age   | gender | sample  | AML diagnosis |                                  | Mutations or<br>molecular<br>translocations | karyotype               | WBC    | Hb    | Plt | Blast (%) |    |
|-------|-------|--------|---------|---------------|----------------------------------|---------------------------------------------|-------------------------|--------|-------|-----|-----------|----|
|       | (yrs) | (m/f)  | used at | FAB           | WHO                              | (G/L)                                       |                         | (g/dL) | (G/L) | PB  | BM        |    |
| 192   | 66    | f      | D,FU    | M5a           | AML with mutated <i>NPM1</i>     | <i>FLT3</i> ITD, <i>NPM1</i>                | 46,XX                   | 56.0   | 8.9   | 88  | 11        | 62 |
| 193   | 78    | m      | D       | M3            | Acute promyelocytic leukemia     | <i>PML-RARA</i>                             | 46,XY,t(15;17)          | 2.6    | 10.1  | 29  | 33        | 81 |
| 194   | 29    | f      | D,FU    | M2            | AML with maturation              | none found                                  | 46,XX                   | 31.0   | 11.5  | 20  | 79        | 56 |
| 195   | 26    | f      | D       | M2            | AML with maturation              | none found                                  | 46,XX                   | 20.8   | 11.4  | 124 | 39        | 65 |
| 196   | 19    | m      | D,FU    | M1            | AML without maturation           | none found                                  | 46,XY                   | 34.4   | 8.2   | 11  | 81        | 79 |
| 197   | 62    | f      | FU      | M2            | AML with maturation              | none found                                  | 46,XX                   | 1.7    | 14.0  | 52  | 0         | 16 |
| 198   | 70    | f      | D       | M2            | AML with mutated <i>NPM1</i>     | <i>NPM1</i>                                 | 46,XX                   | 6.7    | 9.4   | 92  | 38        | 68 |
| 199   | 64    | f      | FU      | M3            | Acute promyelocytic leukemia     | <i>PML-RARA</i>                             | 47,XX,+8,t(15;17)       | 2.5    | 12.2  | 143 | 0         | 8  |
| 200   | 68    | f      | D       | M2            | AML with myelodysplasia          | none found                                  | 46,XX                   | 1.2    | 11.9  | 81  | 3         | 30 |
| 201   | 50    | m      | D       | M4            | AML with mutated <i>NPM1</i>     | <i>NPM1</i>                                 | 46,XY                   | 27.2   | 8.2   | 99  | 0         | 40 |
| 202   | 61    | m      | D       | M4            | AML with mutated <i>NPM1</i>     | <i>FLT3</i> ITD, <i>NPM1</i>                | 46,XY                   | 34.7   | 9.3   | 180 | 32        | 60 |
| 203   | 75    | f      | D       | n.a.          | Therapy related AML              | none found                                  | n.t.                    | 1.07   | 8.4   | 8   | 3         | 47 |
| 204   | 53    | f      | D       | M2            | AML with myelodysplasia          | none found                                  | 45,XX,-7                | 2.4    | 9.3   | 84  | 13        | 30 |
| 205   | 30    | m      | D       | M4eo          | AML with inv(16)                 | <i>FLT3</i> ITD,<br><i>CBFB-MYH11</i>       | 47,XY,+8,inv(16)        | 110.9  | 10.7  | 37  | 80        | 68 |
| 206   | 73    | m      | D       | M0            | AML with myelodysplasia          | none found                                  | 45,XY,-7                | 25.6   | 11.4  | 121 | 88        | 66 |
| 207   | 66    | m      | FU      | M2            | AML with myelodysplasia          | none found                                  | 46,XY                   | 0.9    | 8.6   | 41  | 2         | 22 |
| 208   | 70    | f      | D       | M2            | AML with mutated <i>NPM1</i>     | <i>FLT3</i> ITD, <i>NPM1</i>                | 46,XX                   | 40.5   | 9.8   | 447 | 78        | 71 |
| 209   | 44    | m      | D       | M0            | AML with minimal differentiation | none found                                  | 46,XY                   | 1.7    | 9.7   | 186 | 4         | 65 |
| 210   | 68    | m      | D       | M1            | AML with myelodysplasia          | none found                                  | complex                 | 74.6   | 12.0  | 146 | 95        | 84 |
| 211   | 39    | m      | D,FU    | M4            | Acute myelomonocytic leukemia    | none found                                  | 46,XY,t(11;17)          | 28.5   | 6.7   | 42  | 40        | 47 |
| 212   | 42    | m      | D       | M1            | AML without maturation           | none found                                  | 46,XY                   | 15.2   | 10.8  | 39  | 57        | 53 |
| 213   | 41    | m      | D       | M1            | AML with mutated <i>NPM1</i>     | <i>FLT3</i> ITD, <i>NPM1</i>                | 46,XY                   | 202.3  | 8.3   | 24  | 61        | 65 |
| 214   | 62    | f      | FU      | M5b           | AML with myelodysplasia          | <i>NPM1</i>                                 | 46,XX,del(12p),del(20q) | 12.3   | 9.4   | 12  | 47        | 74 |

| No. # | age   | gender | sample  | AML diagnosis |                                     | Mutations or molecular translocations |                      | WBC   | Hb     | Plt   | Blast (%) |    |
|-------|-------|--------|---------|---------------|-------------------------------------|---------------------------------------|----------------------|-------|--------|-------|-----------|----|
|       | (yrs) | (m/f)  | used at | FAB           | WHO                                 |                                       | karyotype            | (G/L) | (g/dL) | (G/L) | PB        | BM |
| 215   | 53    | m      | D       | M4            | AML with mutated <i>NPM1</i>        | <i>NPM1</i>                           | 46,XY                | 31.7  | 8.2    | 18    | 1         | 25 |
| 216   | 43    | m      | D       | M2            | AML with mutated <i>NPM1</i>        | <i>NPM1</i>                           | 46,XY                | 1.0   | 10.2   | 39    | 11        | 56 |
| 217   | 54    | f      | D,FU    | M4            | AML with myelodysplasia             | none found                            | complex, del(5q)     | 5.4   | 8.6    | 13    | 5         | 64 |
| 218   | 56    | m      | D,FU    | M4            | Acute myelomonocytic leukemia       | <i>FLT3</i> ITD                       | 46,XY                | 47.0  | 6.7    | 145   | 12        | 43 |
| 219   | 73    | f      | FU      | M1            | AML without maturation              | <i>FLT3</i> ITD                       | 46,XX                | 136.4 | 10.5   | 79    | 57        |    |
| 220   | 69    | m      | D       | M0            | AML with myelodysplasia             | none found                            | 46,XY,inv(3),del(7q) | 2.4   | 8.2    | 19    | 2         | 37 |
| 221   | 44    | m      | D,FU    | M4            | Acute myelomonocytic leukemia       | none found                            | 46,XY,t(5;9)         | 25.0  | 9.1    | 24    | 11        | 31 |
| 222   | 64    | m      | D       | M4            | AML with t(11;19), <i>MLL1-ELL</i>  | <i>MLL1-ELL</i> , t(11;19)            | 46,XY                | 219.0 | 7.1    | 34    | 68        | 61 |
| 223   | 54    | m      | D       | M2            | AML with myelodysplasia             | none found                            | 45,XY,-7             | 2.8   | 11.5   | 24    | 16        | 37 |
| 224   | 20    | f      | D,FU    | M2            | Therapy related AML                 | <i>CEBPA</i>                          | 46,XX                | 2.4   | 8.1    | 40    | 32        | 25 |
| 225   | 71    | m      | D       | M4            | Acute myelomonocytic leukemia       | none found                            | 47,XY,+mar           | 46.7  | 10.8   | 116   | 90        | 72 |
| 226   | 46    | m      | D       | M4            | AML with mutated <i>NPM1</i>        | <i>NPM1</i>                           | 46,XY                | 19.0  | 5.0    | 24    | 0         | 50 |
| 227   | 58    | f      | D       | M4            | AML with t(11;17), <i>MLL1-AF17</i> | <i>MLL1-AF-17</i> , t(11;17)          | 46,XX,t(11;17)       | 13.3  | 6.3    | 66    | 71        | 81 |
| 228   | 55    | f      | D       | M3            | Acute promyelocytic leukemia        | <i>PML-RARA</i>                       | 47,XX,t(15;17)       | 3.3   | 9.1    | 67    | 27        | 63 |
| 229   | 70    | f      | D       | M2            | AML with maturation                 | none found                            | 46,XX                | 2.2   | 11.6   | 45    | 0         | 21 |
| 230   | 79    | m      | D       | M1            | AML without maturation              | <i>FLT3</i> ITD                       | 46,XY                | 1.7   | 8.5    | 113   | 49        | 77 |
| 231   | 55    | m      | D       | M2            | AML with mutated <i>NPM1</i>        | <i>FLT3</i> ITD, <i>NPM1</i>          | 46,XY                | 42.0  | 8.5    | 242   | 82        | 62 |
| 232   | 23    | m      | D       | M4eo          | AML with inv(16)                    | <i>CBFB-MYH11</i>                     | complex, inv(16)     | 51.0  | 8.1    | 21    | 17        | 32 |
| 233   | 62    | m      | D       | M1            | AML with mutated <i>NPM1</i>        | <i>NPM1</i> , <i>FLT3</i> ITD         | n.t.                 | 116.7 | 13.2   | 50    | 95        | 95 |
| 234   | 41    | f      | D       | M4eo          | AML with inv(16)                    | <i>CBFB-MYH11</i>                     | 46,XX,inv(16)        | 86.4  | 6.7    | 30    | 7         | 28 |
| 235   | 43    | m      | FU      | M2            | AML with myelodysplasia             | none found                            | 45,XY,der(6),-7      | 6.8   | 11.5   | 58    | 86        | 63 |
| 236   | 70    | m      | D,FU    | M2            | AML with maturation                 | none found                            | 47,XY,+8             | 2.3   | 9.1    | 77    | 0         | 33 |
| 237   | 56    | m      | D,FU    | M1            | AML without maturation              | none found                            | 46,XY                | 2.0   | 8.9    | 45    | 0         | 50 |

| No. # | age   | gender | sample  | AML diagnosis |                                     | Mutations or                         | WBC               | Hb    | Plt  | Blast (%) |       |        |
|-------|-------|--------|---------|---------------|-------------------------------------|--------------------------------------|-------------------|-------|------|-----------|-------|--------|
|       | (yrs) | (m/f)  | used at | FAB           | WHO                                 | molecular translocations             |                   |       |      | karyotype | (G/L) | (g/dL) |
| 238   | 65    | f      | D       | M1            | AML with myelodysplasia             | none found                           | 46,XX             | 1.1   | 7.3  | 84        | 7     | 63     |
| 239   | 36    | m      | D       | M1            | AML with myelodysplasia             | none found                           | 47,XY,del(9q),+21 | 18.5  | 9.2  | 28        | 77    | 77     |
| 240   | 72    | m      | D       | M2            | AML with myelodysplasia             | <i>NPM1</i> ,<br><i>KIT</i> D816V    | 46,XY             | 13.0  | 10.3 | 163       | 77    | 46     |
| 241   | 41    | f      | FU      | n.a.          | n.t.                                | <i>DEK-CAN</i>                       | 46,XX             | 1.4   | 8.5  | 7         | 1     | 75     |
| 242   | 54    | f      | FU      | M2            | AML with maturation                 | none found                           | 46,XX             | 1.8   | 11.8 | 45        | 5     | 30     |
| 243   | 36    | m      | D,FU    | M0            | AML with t(10;11), <i>MLL1-AF10</i> | <i>MLL1-AF10</i>                     | complex           | 1.5   | 12.0 | 192       | 6     | 66     |
| 244   | 74    | f      | D       | M4            | AML with t(6;11), <i>MLL1-AF6</i>   | <i>MLL1-AF6.t(6;11)</i>              | 46,XX             | 3.4   | 8.0  | 3         | 0     | 40     |
| 245   | 76    | m      | D,FU    | M3            | Acute promyelocytic leukemia        | <i>PML-RARA</i>                      | 46,XY,t(15;17)    | 22.8  | 11.9 | 36        | 88    | 90     |
| 246   | 81    | m      | D       | M5a           | AML with t(9;11), <i>MLL1-AF9</i>   | <i>MLL1-AF9</i>                      | 46,XY             | 66.2  | 8.7  | 36        | 90    | 93     |
| 247   | 73    | m      | FU      | M1            | AML without maturation              | none found                           | 47,XY,+8          | 2.0   | 10.0 | 78        | 0     | 2      |
| 248   | 66    | m      | D       | M1            | AML without maturation              | none found                           | 46,XY             | 3.3   | 8.6  | 15        | 79    | 20     |
| 249   | 64    | m      | D       | M1            | AML with mutated <i>NPM1</i>        | <i>FLT3</i> ITD, <i>NPM1</i>         | 45,XY             | 130.3 | 11.8 | 22        | 86    | 85     |
| 250   | 81    | f      | D       | M1            | AML with mutated <i>NPM1</i>        | <i>NPM1</i>                          | 46,XX             | 36.4  | 8.9  | 94        | 86    | 80     |
| 251   | 36    | f      | FU      | M1            | AML without maturation              | <i>FLT3</i> ITD                      | 46,XX             | 1.9   | 10.2 | 92        | 0     | 15     |
| 252   | 66    | m      | D       | M2            | AML with myelodysplasia             | none found                           | 47,XY,+11,der(11) | 2.9   | 10.1 | 21        | 0     | 31     |
| 253   | 41    | f      | D       | M4            | Acute myelomonocytic leukemia       | none found                           | 46,XX             | 2.8   | 8.2  | 61        | 51    | 72     |
| 254   | 45    | f      | D       | M4            | AML with myelodysplasia             | <i>FLT3</i> ITD                      | 46,XX             | 66.8  | 10.2 | 46        | 53    | 66     |
| 255   | 20    | m      | D       | M3            | Acute promyelocytic leukemia        | <i>PML-RARA</i>                      | 46,XY,t(15;17)    | 51.2  | 10.6 | 25        | 90    | 95     |
| 256   | 27    | m      | FU      | M4            | Acute myelomonocytic leukemia       | <i>FLT3</i> ITD                      | 46,XY             | 93.9  | 10.3 | 88        | 76    | 76     |
| 257   | 32    | f      | D       | M4            | AML with mutated <i>NPM1</i>        | <i>NPM1</i> , <i>FLT3</i> ITD        | 46,XX             | 126.2 | 9.1  | 35        | 42    | 32     |
| 258   | 41    | m      | D       | M3v           | Acute promyelocytic leukemia        | <i>PML-RARA</i> ,<br><i>FLT3</i> ITD | 46,XY,t(15;17)    | 57.5  | 9.9  | 15        | 63    | 90     |
| 259   | 63    | f      | D       | n.a.          | Therapy-related AML                 | none found                           | 46,XX             | 0.8   | 6.5  | 24        | 0     | 48     |
| 260   | 83    | m      | D       | M2            | AML with myelodysplasia             | none found                           | complex, del(5q)  | 2.4   | 7.9  | 25        | 0     | 22     |

| No. # | age   | gender | sample  | AML diagnosis |                                     | Mutations or<br>molecular<br>translocations | karyotype        | WBC    | Hb    | Plt | Blast (%) |    |
|-------|-------|--------|---------|---------------|-------------------------------------|---------------------------------------------|------------------|--------|-------|-----|-----------|----|
|       | (yrs) | (m/f)  | used at | FAB           | WHO                                 | (G/L)                                       |                  | (g/dL) | (G/L) | PB  | BM        |    |
| 261   | 62    | m      | D       | M4            | AML with mutated <i>NPM1</i>        | <i>NPM1</i>                                 | 46,XY            | 233.7  | 7.9   | 53  | 9         | 28 |
| 262   | 81    | m      | D       | M4            | AML with mutated <i>NPM1</i>        | <i>NPM1, FLT3</i> ITD,<br><i>KIT</i> D816V  | 46,XY            | 198.5  | 10.2  | 27  | 25        | 66 |
| 263   | 69    | m      | D       | M0            | AML with minimal<br>differentiation | none found                                  | 46,XY            | 1.1    | 9.8   | 106 | 0         | 78 |
| 264   | 58    | m      | D       | M1            | AML with t(8;21)                    | <i>AML1-ETO</i>                             | 46,XY,t(8;21)    | 9.6    | 9.5   | 12  | 85        | 77 |
| 265   | 53    | m      | D       | M2            | AML with mutated <i>NPM1</i>        | <i>NPM1</i>                                 | 46,XY            | 5.0    | 8.2   | 47  | 46        | 50 |
| 266   | 81    | f      | D       | M0            | AML with myelodysplasia             | none found                                  | 94,XXXX, complex | 1.4    | 11.4  | 122 | 16        | 46 |
| 267   | 68    | m      | D       | M4            | AML with mutated <i>NPM1</i>        | <i>NPM1</i>                                 | 46,XY            | 22.7   | 10.4  | 28  | 53        | 72 |
| 268   | 73    | f      | D       | M6            | Acute erythroid leukemia            | none found                                  | 46,XX            | 4.4    | 8.2   | 173 | 1         | 43 |
| 269   | 64    | m      | D       | M5a           | Acute monoblastic leukemia          | none found                                  | 46,XY,dup(11q)   | 56.0   | 9.1   | 12  | 70        | 70 |
| 270   | 22    | f      | D       | M1            | AML without maturation              | none found                                  | 47,XX,+11        | 2.8    | 9.5   | 78  | 57        | 65 |
| 271   | 81    | f      | D       | M1            | AML with myelodysplasia             | none found                                  | complex          | 2.6    | 8.4   | 25  | 53        | 77 |
| 272   | 55    | f      | D       | M2            | AML with myelodysplasia             | none found                                  | 45,XX,-7,-17     | 10.5   | 9.8   | 94  | 22        | 40 |
| 273   | 76    | m      | D       | M2            | Therapy-related AML                 | none found                                  | complex          | 51.3   | 7.7   | 63  | 69        | 61 |
| 274   | 88    | f      | D       | n.a.          | AML with mutated <i>NPM1</i>        | <i>NPM1, FLT3</i> ITD                       | n.t.             | 62.4   | 7.0   | 21  | 89        | 95 |

Abbreviations: No. #, patient number; WBC, white blood count; Hb, hemoglobin; Plt, platelet count; yrs, years; m, male; f, female; FAB, French-American-British cooperative study group; WHO, world health organization classification, 4<sup>th</sup> Edition; PB, peripheral blood; BM, bone marrow; G/L, 10<sup>9</sup> cells per liter; g/dL, gram per deciliter; m, male; f, female; D, used at time of diagnosis or persistence of blasts after induction chemotherapy; FU, used during follow up; n.a., not available; n.t., not tested; AML, acute myeloid leukemia; *FLT3* ITD, fms like tyrosine kinase 3 internal tandem duplication; *NPM1*, nucleophosmin mutation; complex karyotype: at least three cytogenetic aberrations.

**Table S4**

Patients' characteristics - other hematologic neoplasms

| No. # | age   | gender | diagnosis | FAB    | WHO     | mutations | karyotype                              | WBC<br>(G/L) | Hb<br>(g/dL) | Plt<br>(G/L) | Blast (%) |    |
|-------|-------|--------|-----------|--------|---------|-----------|----------------------------------------|--------------|--------------|--------------|-----------|----|
|       | (yrs) | (m/f)  |           |        |         |           |                                        |              |              |              | PB        | BM |
| 1     | 83    | m      | MDS       | RA     | RCMD    | n.t.      | n.t.                                   | 5.5          | 11.0         | 78           | 0         | 2  |
| 2     | 86    | f      | MDS       | RARS   | RARS    | n.t.      | 46,XX                                  | 2.0          | 10.3         | 151          | 0         | 2  |
| 3     | 84    | m      | MDS       | RAEB-2 | RAEB-2  | n.t.      | n.t.                                   | 5.5          | 10.5         | 25           | 3         | 15 |
| 4     | 66    | f      | MDS       | RAEB-2 | RAEB-2  | n.t.      | 47,XX,+21                              | 2.9          | 9.5          | 231          | 2         | 10 |
| 5     | 70    | m      | MDS       | RAEB-2 | RAEB-2  | n.t.      | n.t.                                   | 1.2          | 7.9          | 76           | 0         | 14 |
| 6     | 78    | f      | MDS       | RA     | del(5q) | n.t.      | 46,XX,del(5q)                          | 8.4          | 8.2          | 152          | 0         | 3  |
| 7     | 81    | m      | MDS       | RA     | RCUD    | n.t.      | n.t.                                   | 13.3         | 11.6         | 19           | 1         | 8  |
| 8     | 69    | m      | MDS       | RAEB-2 | RAEB-2  | n.t.      | 47,XY,+8                               | 1.1          | 14.8         | 44           | 0         | 19 |
| 9     | 82    | m      | MDS       | RAEB-1 | RAEB-1  | n.t.      | n.t.                                   | 1.7          | 10.3         | 105          | 0         | 7  |
| 10    | 72    | f      | MDS       | RAEB-1 | RAEB-1  | n.t.      | 46,XX,del(20q)/47,XX,del(20q),del(20q) | 4.2          | 5.6          | 25           | 0         | 9  |
| 11    | 76    | m      | MDS       | RAEB-1 | RAEB-1  | n.t.      | 45,XY,-7                               | 2.6          | 10.6         | 39           | 0         | 5  |
| 12    | 52    | f      | MDS       | RA     | del(5q) | n.t.      | 46,XX,del(5q)                          | 4.9          | 8.0          | 409          | 0         | 1  |
| 13    | 51    | f      | MDS       | RAEB-1 | RAEB-1  | n.t.      | 46,XX,del(7q)                          | 1.8          | 10.0         | 82           | 0         | 5  |
| 14    | 59    | m      | MDS       | RA     | RCMD    | n.t.      | 46,XY                                  | 3.0          | 6.7          | 71           | 0         | 1  |
| 15    | 57    | m      | MDS       | RAEB-2 | RAEB-2  | n.t.      | 46,XY                                  | 4.1          | 10.3         | 47           | 0         | 11 |
| 16    | 72    | f      | MDS       | RARS   | RARS    | n.t.      | 46,XX                                  | 2.6          | 8.9          | 349          | 0         | 1  |
| 17    | 70    | f      | MDS       | RA     | del(5q) | n.t.      | 46,XX,del(5q)/47,XX,del(5q),+8         | 2.7          | 8.9          | 267          | 0         | 2  |
| 18    | 72    | m      | MDS       | RA     | RCMD    | n.t.      | 45,X,-Y/45,XY,-21/45,XY,-22            | 11.7         | 8.1          | 342          | 0         | 2  |
| 19    | 80    | f      | MDS       | RA     | del(5q) | n.t.      | 46,XX,del(5q)                          | 8.7          | 8.6          | 354          | 0         | 1  |
| 20    | 54    | m      | MDS       | RA     | RCMD    | n.t.      | 46,XY                                  | 1.3          | 13.2         | 16           | 0         | 1  |
| 21    | 63    | m      | MDS       | RA     | del(5q) | n.t.      | 46,XY,del(5q)                          | 1.9          | 10.5         | 317          | 0         | 3  |

| No. # | age   | gender | diagnosis | FAB    | WHO     | mutations            | karyotype      | WBC<br>(G/L) | Hb<br>(g/dL) | Pit<br>(G/L) | Blast (%) |    |
|-------|-------|--------|-----------|--------|---------|----------------------|----------------|--------------|--------------|--------------|-----------|----|
|       | (yrs) | (m/f)  |           |        |         |                      |                |              |              |              | PB        | BM |
| 22    | 76    | m      | MDS       | RA     | RCUD    | n.t.                 | 45,X,-Y        | 2.4          | 11.8         | 111          | 0         | 1  |
| 23    | 74    | m      | MDS       | RA     | del(5q) | n.t.                 | 46,XY,del(5q)  | 1.8          | 8.4          | 89           | 0         | 2  |
| 24    | 64    | m      | MDS       | RAEB   | RAEB-2  | n.t.                 | 46,XY,del(7p)  | 1.8          | 7.8          | 118          | 0         | 14 |
| 25    | 63    | m      | MDS       | RA     | RCMD    | n.t.                 | complex        | 3.3          | 10.0         | 134          | 0         | 5  |
| 26    | 73    | f      | MDS       | RAEB-2 | RAEB-2  | n.t.                 | n.t.           | 3.0          | 11.4         | 93           | 0         | 15 |
| 27    | 58    | m      | MDS       | RAEB   | RAEB-1  | n.t.                 | 46,XY          | 4.2          | 11.4         | 122          | 0         | 6  |
| 28    | 88    | m      | MDS       | RA     | RCMD    | n.t.                 | 45,XY,-7       | 2.0          | 9.1          | 90           | 0         | 3  |
| 29    | 69    | f      | MDS       | RA     | RCMD    | n.t.                 | 46,XX          | 4.0          | 8.9          | 114          | 0         | 1  |
| 30    | 76    | m      | MDS       | RAEB-2 | RAEB-2  | n.t.                 | 46,XY          | 4.5          | 8.6          | 41           | 0         | 11 |
| 31    | 39    | m      | MDS       | RAEB-2 | RAEB-2  | n.t.                 | 48,XY,+8,+12   | 2.8          | 12.6         | 52           | 4         | 15 |
| 32    | 72    | m      | MDS       | RA     | RCUD    | TCR<br>Rearrangement | 46,XY          | 7.1          | 11.0         | 58           | 0         | 1  |
| 33    | 76    | m      | MDS       | RAEB-2 | RAEB-2  | n.t.                 | 46,XY          | 1.4          | 10.8         | 22           | 0         | 12 |
| 34    | 84    | f      | MDS       | RA     | del(5q) | n.t.                 | 46,XX,del(5q)  | 6.2          | 9.3          | 332          | 0         | 2  |
| 35    | 57    | f      | MDS       | RAEB-1 | RAEB-1  | n.t.                 | 46,XX,del(11q) | 4.2          | 12.6         | 295          |           | 5  |
| 36    | 78    | m      | MDS       | RARS   | del(5q) | n.t.                 | 46,XY,del(5q)  | 4.2          | 9.6          | 122          | 0         | 1  |
| 37    | 63    | f      | MDS       | RARS   | RARS    | n.t.                 |                | 5.7          | 8.0          | 85           | 0         | 3  |
| 38    | 80    | f      | MDS       | RAEB-1 | RAEB-1  | n.t.                 | 46,XX          | 1.8          | 10.8         | 46           | 0         | 4  |
| 39    | 73    | f      | MDS       | RAEB-1 | RAEB-1  | n.t.                 |                | 10.0         | 11.3         | 34           | 0         | 1  |
| 40    | 78    | m      | MDS       | RAEB-2 | RAEB-2  | <i>FLT3</i> ITD      | 46,XY,del(20q) | 2.1          | 9.6          | 43           | 0         | 17 |
| 41    | 72    | m      | MDS       | RARS   | RARS    | n.t.                 | 46,XY          | 7.3          | 9.5          | 266          | 0         | 1  |
| 42    | 53    | f      | MDS       | RAEB-2 | RAEB-2  | n.t.                 | 45,XX,-7       | 2.0          | 7.3          | 203          | 2         | 13 |
| 43    | 64    | m      | MDS       | RAEB-1 | RAEB-1  | n.t.                 |                | 1.4          | 8.6          | 117          | 0         | 9  |
| 44    | 63    | m      | MDS       | RARS   | RARS    | n.t.                 |                | 8.5          | 8.6          | 286          | 0         | 1  |
| 45    | 70    | m      | MDS       | RA     | RCMD    | n.t.                 | 46,XY          | 8.0          | 9.5          | 157          | 0         | 2  |
| 46    | 66    | m      | MDS       | RAEB-2 | RAEB-2  | n.t.                 | complex        | 1.9          | 8.6          | 24           | 2         | 11 |
| 47    | 65    | f      | MDS       | RA     | del(5q) | n.t.                 | 46,XX,del(5q)  | 5.7          | 10.5         | 284          | 0         | 2  |
| 48    | 71    | m      | MDS       | RAEB   | RAEB-2  | n.t.                 | 46,XY          | 1.5          | 10.1         | 10           | 8         | 16 |

| No. # | age   | gender | diagnosis | FAB    | WHO       | mutations  | karyotype               | WBC<br>(G/L) | Hb<br>(g/dL) | Pit<br>(G/L) | Blast (%) |      |
|-------|-------|--------|-----------|--------|-----------|------------|-------------------------|--------------|--------------|--------------|-----------|------|
|       | (yrs) | (m/f)  |           |        |           |            |                         |              |              |              | PB        | BM   |
| 49    | 77    | f      | MDS       | RA     | del(5q)   | n.t.       | 46,XX,del(5q)           | 2.5          | 8.8          | 13           | 0         | n.t. |
| 50    | 67    | m      | MDS       | RAEB   | RAEB-2    | n.t.       | 46,XY,del(5q)           | 3.8          | 9.6          | 109          | 1         | 11   |
| 51    | 85    | m      | MDS       | RAEB   | RAEB-2    | n.t.       | 46,XY,del(5q)           | 2.6          | 6.7          | 14           | 9         | 12   |
| 52    | 66    | m      | MDS       | RAEB-2 | RAEB-2    | n.t.       | 46,XY,del(10q),t(10;21) | 6.2          | 8.9          | 16           | 2         | 14   |
| 53    | 64    | m      | MDS       | RAEB   | RAEB-2    | n.t.       | 46,XY                   | 3.7          | 12.3         | 58           | 0         | 11   |
| 54    | 75    | f      | MDS       | RA     | del(5q)   | n.t.       | 47,XX,del(5q),+8        | 3.6          | 9.7          | 413          | 0         | 3    |
| 55    | 65    | f      | MDS       | RA     | RCMD      | n.t.       | n.t.                    | 3.6          | 8.2          | 110          | 0         | 3    |
| 56    | 69    | m      | MDS       | RA     | RCUD      | n.t.       | 46,XY                   | 5.8          | 12.9         | 79           | 0         | 1    |
| 57    | 71    | f      | MDS       | RA     | RCMD      | n.t.       | 46,XX                   | 1.6          | 11.4         | 27           | 0         | 2    |
| 58    | 77    | m      | MDS       | RAEB-2 | RAEB-2    | n.t.       | complex, del(5q)        | 2.8          | 9.9          | 33           | 3         | 18   |
| 59    | 56    | m      | MDS/MPN   | CMML   | CMML-1    | n.t.       | 46,XY                   | 16.0         | 8.7          | 49           | 1         | 2    |
| 60    | 72    | m      | MDS/MPN   | n.a.   | MDS/MPN-U | n.t.       | n.t.                    | 45.3         | 8.7          | 40           | 0         | 1    |
| 61    | 75    | m      | MDS/MPN   | CMML   | CMML-2    | n.t.       | n.t.                    | 17.7         | 11.3         | 132          | 2         | 15   |
| 62    | 62    | m      | MDS/MPN   | CMML   | CMML-2    | JAK2 V617F | n.t.                    | 24.6         | 8.3          | 49           | 15        | n.t. |
| 63    | 46    | m      | MDS/MPN   | CMML   | CMML-2    | n.t.       | complex                 | 39.1         | 8.5          | 22           | 1         | 6    |
| 64    | 81    | m      | MDS/MPN   | CMML   | CMML-2    | n.t.       | 46,XY                   | 8.9          | 11.0         | 8            | 2         | 10   |
| 65    | 73    | m      | MDS/MPN   | CMML   | CMML-1    | n.t.       | 46,XY                   | 4.7          | 8.1          | 36           | 0         | 6    |
| 66    | 62    | m      | MDS/MPN   | CMML   | CMML-2    | n.t.       | 46,XY                   | 77.1         | 10.3         | 26           | 7         | 11   |
| 67    | 71    | m      | MDS/MPN   | RAEB-2 | MDS/MPN-U | n.t.       | 47,XY,+8                | 25.4         | 7.6          | 137          | 11        | 8    |
| 68    | 66    | m      | MDS/MPN   | RAEB-2 | MDS/MPN-U | n.t.       | n.t.                    | 26.2         | 10.5         | 39           | 13        | 15   |
| 69    | 61    | m      | MDS/MPN   | n.a.   | MDS/MPN-U | n.t.       | 46,XY                   | 9.5          | 9.9          | 512          | 0         | 1    |
| 70    | 72    | m      | MDS/MPN   | CMML   | CMML-1    | n.t.       | 46,XY                   | 21.6         | 11.8         | 64           | 0         | 4    |
| 71    | 76    | f      | MDS/MPN   | n.a.   | MDS/MPN-U | n.t.       | complex                 | 21.0         | 9.1          | 19           | 4         | 6    |
| 72    | 83    | f      | MDS/MPN   | CMML   | CMML-1    | n.t.       | 46,XX                   | 16.1         | 10.3         | 160          | 1         | 3    |
| 73    | 78    | f      | MDS/MPN   | CMML   | CMML-1    | n.t.       | 46,XX                   | 6.0          | 10.1         | 137          | 0         | 4    |
| 74    | 71    | f      | MDS/MPN   | CMML   | CMML-1    | n.t.       | 46,XX,del(20q)          | 9.4          | 11.5         | 54           | 0         | 4    |
| 75    | 77    | m      | MDS/MPN   | CMML   | CMML-1    | n.t.       | n.t.                    | 17.6         | 9.8          | 11           | 0         | 2    |

| No. # | age   | gender | diagnosis | FAB  | WHO       | mutations | karyotype | WBC<br>(G/L) | Hb<br>(g/dL) | Plt<br>(G/L) | Blast (%) |    |
|-------|-------|--------|-----------|------|-----------|-----------|-----------|--------------|--------------|--------------|-----------|----|
|       | (yrs) | (m/f)  |           |      |           |           |           |              |              |              | PB        | BM |
| 76    | 56    | m      | MDS/MPN   | n.a. | MDS/MPN-U | n.t.      | n.t.      | 15.7         | 10.5         | 256          | 0         | 1  |
| 77    | 62    | m      | MDS/MPN   | CMML | CMML-1    | n.t.      | 46,XY     | 70.3         | 10.2         | 148          | 2         | 8  |
| 78    | 73    | f      | MDS/MPN   | CMML | CMML-2    | n.t.      | 46,XX     | 18.1         | 10.6         | 28           | 9         | 11 |
| 79    | 53    | f      | MDS/MPN   | CMML | CMML-2    | n.t.      | 47,XX,+6  | 3.3          | 9.5          | 33           | 18        | 17 |
| 80    | 47    | f      | MDS/MPN   | CMML | CMML-2    | n.t.      | 46,XX     | 39.9         | 10.1         | 26           | 3         | 14 |
| 81    | 71    | m      | MDS/MPN   | CMML | CMML-2    | n.t.      | 47,XY,+8  | 19.5         | 8.4          | 259          | 0         | 20 |

Abbreviations: No. #, patient number; WBC, white blood count; Hb, hemoglobin; Plt, platelet count; yrs, years; m, male; f, female; FAB, French-American-British classification; WHO, World Health Organisation classification, 4<sup>th</sup> edition; PB, peripheral blood; BM, bone marrow; MDS/MPN, myelodysplastic/myeloproliferative overlap neoplasm; MDS, myelodysplastic syndrome; MPN, myeloproliferative neoplasm; SM, systemic mastocytosis; CMML, chronic myelomonocytic leukemia; RARS, refractory anemia with ring sideroblasts; RAEB, RA with excess of blasts; del(5q), deletion of chromosome 5q; RCUD, refractory cytopenia with unilineage dysplasia; RCMD, refractory cytopenia with multilineage dysplasia; n.a., not available; n.t., not tested.



**Table S5**

Patients' characteristics of control patients: lymphoma, normal bone marrow, premalignant conditions and cord blood samples

| No. # | age   | gender | diagnosis | karyotype | WBC<br>(G/L) | Hb<br>(g/dL) | Plt<br>(G/L) | Blast (%) |      |
|-------|-------|--------|-----------|-----------|--------------|--------------|--------------|-----------|------|
|       | (yrs) | (m/f)  |           |           |              |              |              | PB        | BM   |
| 1     | 77    | m      | ICUS      | 46,XY     | 3.2          | 12.5         | 93           | 0         | 2    |
| 2     | 67    | f      | ICUS      | n.t.      | 2.9          | 12.9         | 33           | 0         | 3    |
| 3     | 82    | f      | ICUS      | n.t.      | 7.4          | 11.8         | 82           | 0         | 1    |
| 4     | 56    | f      | ICUS      | n.t.      | 1.6          | 11.6         | 25           | 0         | 1    |
| 5     | 59    | f      | ICUS      | n.t.      | 2.9          | 13.5         | 58           | 0         | 3    |
| 6     | 78    | m      | ICUS      | n.t.      | 2.5          | 16.0         | 118          | 0         | 1    |
| 7     | 50    | f      | ICUS      | 46,XX     | 3.9          | 11.1         | 205          | 0         | 2    |
| 8     | 60    | m      | ICUS      | 46,XY     | 1.5          | 10.9         | 45           | 0         | 2    |
| 9     | 44    | f      | ICUS      | 46,XX     | 4.0          | 10.8         | 189          | 0         | 1    |
| 10    | 75    | m      | ICUS      | n.t.      | 7.9          | 14.8         | 12           | n.t.      | 1    |
| 11    | 36    | f      | ICUS      | 46,XX     | 2.2          | 11.1         | 310          | 0         | 1    |
| 12    | 82    | m      | ICUS      | n.t.      | 3.0          | 14.4         | 211          | 0         | 1    |
| 13    | 23    | f      | ICUS      | n.t.      | 6.0          | 13.8         | 37           | 0         | 1    |
| 14    | 70    | f      | ICUS      | 46,XX     | 2.8          | 10.5         | 97           | 0         | 1    |
| 15    | 20    | m      | ICUS      | 46,XY     | 3.8          | 12.3         | 47           | 0         | 1    |
| 16    | 69    | f      | ICUS      | n.t.      | 12.8         | 11.4         | 45           | 0         | 1    |
| 17    | 53    | f      | ICUS      | 46,XX     | 3.2          | 11.3         | 173          | 0         | 1    |
| 18    | 34    | f      | ICUS      | n.t.      | 2.5          | 13.7         | 159          | 0         | 1    |
| 19    | 64    | m      | ICUS      | 46,XY     | 5.3          | 8.2          | 96           | 0         | 1    |
| 20    | 79    | m      | ICUS      | n.t.      | 3.4          | 13.2         | 89           | 0         | 1    |
| 21    | 69    | m      | ICUS      | 46,XY     | 4.6          | 9.9          | 136          | 0         | 1    |
| 22    | 53    | f      | ICUS      | n.t.      | 11.0         | 11.2         | 11           | 0         | 1    |
| 23    | 56    | f      | ICUS      | n.t.      | 7.9          | 14.2         | 261          | 0         | n.t. |
| 24    | 34    | f      | ICUS      | 46,XX     | 4.8          | 11.6         | 201          | 0         | 1    |

| No. # | age   | gender | diagnosis          | karyotype | WBC<br>(G/L) | Hb<br>(g/dL) | Pit<br>(G/L) | Blast (%) |      |
|-------|-------|--------|--------------------|-----------|--------------|--------------|--------------|-----------|------|
|       | (yrs) | (m/f)  |                    |           |              |              |              | PB        | BM   |
| 25    | 81    | m      | ICUS               | 45,X,-Y   | 9.1          | 10.3         | 258          | 0         | 1    |
| 26    | 69    | m      | ICUS               | n.t.      | 2.4          | 10.6         | 1            | 0         | 1    |
| 27    | 39    | m      | ICUS               | n.t.      | 9.5          | 14.8         | 27           | 0         | n.t. |
| 28    | 80    | m      | ICUS               | 46,XY     | 3.6          | 15.1         | 107          | 0         | 4    |
| 29    | 68    | f      | ICUS               | 46,XX     | 2.5          | 13.8         | 189          | 0         | 2    |
| 30    | 72    | m      | ICUS               | 46,XY     | 3.6          | 13.3         | 120          | 0         | 1    |
| 31    | 38    | f      | ICUS               | 46,XX     | 2.7          | 12.9         | 289          | 0         | 1    |
| 32    | 58    | m      | ICUS               | n.t.      | 1.5          | 12.8         | 216          | 0         | 2    |
| 33    | 62    | m      | ICUS               | n.t.      | 5.0          | 8.4          | 94           | 0         | 2    |
| 34    | 33    | f      | ICUS               | 46,XX     | 12.0         | 11.7         | 133          | 0         | 2    |
| 35    | 73    | f      | ICUS               | n.t.      | 2.6          | 9.3          | 256          | 0         | 2    |
| 36    | 37    | f      | ICUS               | n.t.      | 2.7          | 11.6         | 196          | 0         | 0    |
| 37    | 64    | m      | ICUS               | n.t.      | 3.7          | 9.8          | 67           | 0         | 1    |
| 38    | 70    | m      | ICUS               | n.t.      | 7.9          | 15.6         | 59           | 0         | 1    |
| 39    | 82    | f      | ICUS               | n.t.      | 3.6          | 11.5         | 134          | 0         | 2    |
| 40    | 79    | m      | ICUS               | n.t.      | 6.9          | 12.8         | 102          | 0         | 1    |
| 41    | 41    | m      | Hodgkin's lymphoma | n.t.      | 10.0         | 15.5         | 279          | 0         | 1    |
| 42    | 57    | m      | suspected NHL      | 46,XY     | 6.0          | 17.6         | 95           | 0         | 1    |
| 43    | 38    | f      | suspected CML      | n.t.      | 85.1         | 10.8         | 285          | 0         | 1    |
| 44    | 28    | f      | NHL                | n.t.      | 6.0          | 10.8         | 297          | 0         | 1    |
| 45    | 43    | m      | Hodgkin's lymphoma | n.t.      | 8.5          | 14.3         | 288          | 0         | 1    |
| 46    | 47    | f      | Hodgkin's lymphoma | n.t.      | 8.2          | 13.2         | 345          | 0         | 1    |
| 47    | 78    | m      | NHL                | n.t.      | 12.6         | 15.0         | 266          | 0         | 1    |
| 48    | 70    | m      | suspected NHL      | n.t.      | 3.6          | 10.2         | 189          | 0         | 2    |
| 49    | 88    | f      | NHL                | n.t.      | 9.8          | 12.9         | 297          | 0         | 1    |
| 50    | 74    | m      | NHL                | n.t.      | 2.5          | 11.6         | 56           | 0         | 1    |
| 51    | 55    | m      | NHL                | n.t.      | 6.6          | 13.4         | 86.3         | 0         | 1    |
| 52    | 23    | m      | NHL                | n.t.      | 11.7         | 14.1         | 210          | 0         | 2    |

| No. # | age   | gender | diagnosis              | karyotype | WBC<br>(G/L) | Hb<br>(g/dL) | Plt<br>(G/L) | Blast (%) |      |
|-------|-------|--------|------------------------|-----------|--------------|--------------|--------------|-----------|------|
|       | (yrs) | (m/f)  |                        |           |              |              |              | PB        | BM   |
| 53    | 52    | m      | NHL                    | n.t.      | 10.2         | 12.0         | 192          | 0         | 1    |
| 54    | 63    | f      | NHL                    | n.t.      | 6.8          | 14.6         | 208          | 0         | 1    |
| 55    | 66    | f      | NHL                    | n.t.      | 6.4          | 13.4         | 268          | 0         | 1    |
| 56    | 53    | m      | Hodgkin's lymphoma     | n.t.      | 7.4          | 9.5          | 316          | 0         | 1    |
| 57    | 69    | f      | NHL                    | 46,XX     | 6.2          | 12.9         | 276          | n.t.      | 2    |
| 58    | 52    | f      | NHL                    | n.t.      | 7.4          | 11.6         | 587          | 0         | 1    |
| 59    | 48    | f      | NHL                    | n.t.      | 17.0         | 11.4         | 387          | 0         | 1    |
| 60    | 46    | f      | Hodgkin's lymphoma     | n.t.      | 6.5          | 14.4         | 165          | 0         | 1    |
| 61    | 58    | f      | NHL                    | complex   | 5.1          | 12.0         | 230          | 0         | 2    |
| 62    | 50    | m      | suspected mastocytosis | n.t.      | 7.4          | 15.3         | 242          | n.t.      | 1    |
| 63    | 65    | f      | normal bone marrow     | 46,XX     | 5.4          | 13.3         | 289          | 0         | 1    |
| 64    | 26    | f      | NHL                    | n.t.      | 6.3          | 12.8         | 345          | 0         | 1    |
| 65    | 37    | m      | Hodgkin's lymphoma     | n.t.      | 7.0          | 15.1         | 245          | 0         | 1    |
| 66    | 87    | m      | normal bone marrow     | 46,XY     | 9.7          | 12.5         | 254          | 0         | 1    |
| 67    | 79    | m      | NHL                    | 46,XY     | 12.7         | 12.5         | 627          | 0         | 1    |
| 68    | 49    | f      | NHL                    | n.t.      | 5.1          | 11.9         | 214          | 0         | n.t. |
| 69    | 47    | f      | MGUS                   | n.t.      | 5.6          | 12.1         | 222          | 0         | 2    |
| 70    | 69    | f      | Hodgkin's lymphoma     | n.t.      | 8.7          | 14.2         | 292          | 0         | 1    |
| 71    | 82    | m      | NHL                    | n.t.      | 5.4          | 13.2         | 226          | 0         | 1    |
| 72    | 73    | m      | NHL                    | 46,XY     | 4.5          | 8.5          | n.t.         | n.t.      | 1    |
| 73    | 76    | m      | Hodgkin's lymphoma     | n.t.      | 4.6          | 9.0          | 142          | 0         | 1    |
| 74    | 40    | m      | NHL                    | n.t.      | 5.5          | 14.6         | 247          | 0         | 1    |
| 75    | 36    | f      | Ewing's Sarcoma        | n.t.      | 7.7          | 11.6         | 357          | 0         | 1    |
| 76    | 28    | m      | NHL                    | n.t.      | 13.2         | 14.6         | 303          | 0         | 1    |
| 77    | 38    | f      | Hodgkin's lymphoma     | n.t.      | 7.7          | 14.0         | 280          | 0         | 1    |
| 78    | 28    | m      | NHL                    | n.t.      | 5.2          | 16.9         | 198          | 0         | 2    |
| 79    | 66    | m      | NHL                    | n.t.      | 19.3         | 15.6         | 223          | 0         | 1    |
| 80    | 30    | m      | Hodgkin's lymphoma     | 46,XY     | 6.0          | 13.0         | 258          | 0         | 2    |

| No. # | age   | gender | diagnosis              | karyotype | WBC<br>(G/L) | Hb<br>(g/dL) | Pit<br>(G/L) | Blast (%) |    |
|-------|-------|--------|------------------------|-----------|--------------|--------------|--------------|-----------|----|
|       | (yrs) | (m/f)  |                        |           |              |              |              | PB        | BM |
| 81    | 62    | m      | NHL                    | n.t.      | 4.5          | 13.1         | 60           | 0         | 1  |
| 82    | 19    | m      | suspected mastocytosis | n.t.      | 5.4          | 15.5         | 177          | 0         | 1  |
| 83    | 19    | m      | Hodgkin's lymphoma     | n.t.      | 9.4          | 9.3          | 557          | 0         | 1  |
| 84    | 56    | m      | NHL                    | n.t.      | 6.6          | 16.6         | 166          | 0         | 1  |
| 85    | 61    | m      | NHL                    | 46,XY     | 8.1          | 7.6          | 530          | 0         | 1  |
| 86    | 54    | f      | NHL                    | n.t.      | 6.4          | 13.4         | 202          | 0         | 1  |
| 87    | 23    | m      | suspected mastocytosis | 46,XY     | 6.0          | 14.4         | 165          | 0         | 1  |
| 88    | 28    | m      | NHL                    | n.t.      | 6.8          | 14.0         | 326          | n.t.      | 1  |
| 89    | 54    | m      | suspected mastocytosis | 46,XY     | 9.5          | 16.0         | 356          | 0         | 1  |
| 90    | 27    | f      | Dysgerminoma           | n.t.      | 9.1          | 13.8         | 354          | 0         | 1  |
| 91    | 71    | f      | NHL                    | n.t.      | 7.3          | 10.8         | 177          | 0         | 1  |
| 92    | 35    | m      | suspected mastocytosis | n.t.      | 7.3          | 14.2         | 241          | 0         | 1  |
| 93    | 81    | f      | NHL                    | n.t.      | 5.2          | 8.8          | 139          | 0         | 2  |
| 94    | 66    | f      | NHL                    | n.t.      | 5.9          | 14.9         | 307          | 0         | 1  |
| 95    | 24    | f      | NHL                    | n.t.      | 8.4          | 11.1         | 317          | 0         | 1  |
| 96    | 77    | f      | NHL                    | n.t.      | 3.9          | 10.2         | 110          | 0         | 1  |
| 97    | 32    | m      | suspected mastocytosis | 46,XY     | 4.3          | 15.2         | 278          | 0         | 1  |
| 98    | 59    | f      | NHL                    | n.t.      | 4.9          | 12.3         | 238          | 0         | 1  |
| 99    | 42    | m      | suspected NHL          | 46,XY     | 15.7         | 7.8          | 259          | 1         | 1  |
| 100   | 73    | m      | NHL                    | n.t.      | 5.2          | 11.9         | 212          | 0         | 1  |
| 101   | 71    | f      | NHL                    | n.t.      | 17.8         | 9.7          | 530          | 0         | 1  |
| 102   | 24    | m      | Hodgkin's lymphoma     | n.t.      | 6.3          | 16.4         | 191          | 0         | 1  |
| 103   | 57    | m      | NHL                    | n.t.      | 4.2          | 14.4         | 196          | 0         | 1  |
| 104   | 54    | f      | NHL                    | n.t.      | 15.5         | 9.1          | 331          | 0         | 1  |
| 105   | 47    | f      | cutaneous mastocytosis | n.t.      | 7.7          | 14.9         | 215          | 0         | 1  |
| 106   | 78    | f      | Hodgkin's lymphoma     | n.t.      | 13.2         | 10.2         | 516          | 0         | 1  |
| 107   | 29    | m      | NHL                    | n.t.      | 12.1         | 13.7         | 375          | 0         | 1  |
| 108   | 39    | f      | Hodgkin's lymphoma     | n.t.      | 11.0         | 9.6          | 614          | 0         | 1  |

| No. # | age<br>(yrs) | gender<br>(m/f) | diagnosis              | karyotype | WBC   | Hb     | Plt   | Blast (%) |      |
|-------|--------------|-----------------|------------------------|-----------|-------|--------|-------|-----------|------|
|       |              |                 |                        |           | (G/L) | (g/dL) | (G/L) | PB        | BM   |
| 109   | 52           | f               | NHL                    | n.t.      | 1.9   | 13.2   | 67    | 0         | 1    |
| 110   | 64           | f               | NHL                    | 46,XX     | 5.6   | 8.7    | 444   | 0         | 1    |
| 111   | 59           | m               | NHL                    | n.t.      | 31.0  | 14.9   | 276   | 0         | 1    |
| 112   | 44           | f               | suspected mastocytosis | n.t.      | 7.1   | 14.1   | 267   | 0         | 1    |
| 113   | 74           | m               | NHL                    | n.t.      | 8.1   | 9.7    | 345   | 0         | 1    |
| 114   | 46           | m               | NHL                    | n.t.      | 17.8  | 13.8   | 332   | n.t.      | 1    |
| 115   | 75           | m               | NHL                    | n.t.      | 102.0 | 14.3   | 123   | 2         | n.t. |
| 116   | 38           | m               | Hodgkin's lymphoma     | n.t.      | 14.8  | 13.1   | 234   | n.t.      | 2    |
| 117   | 55           | m               | NHL                    | n.t.      | 1.7   | 9.2    | 49    | 0         | 1    |
| 118   | 27           | m               | Hodgkin's lymphoma     | n.t.      | 7.8   | 13.1   | 336   | 0         | n.t. |
| 119   | 86           | f               | NHL                    | 46,XX     | 8.8   | 11.9   | 184   | 0         | 1    |
| 120   | 68           | f               | NHL                    | 46,XX     | 6.1   | 11.8   | 350   | 0         | 1    |
| 121   | 28           | m               | NHL                    | n.t.      | 6.7   | 13.7   | 305   | 0         | 1    |
| 122   | 71           | m               | NHL                    | n.t.      | 13.0  | 14.7   | 108   | 0         | 1    |
| 123   | 24           | m               | Hodgkin's lymphoma     | n.t.      | 6.1   | 13.1   | 243   | 0         | 1    |
| 124   | 80           | m               | MGUS                   | n.t.      | 10.7  | 16.0   | 172   | 0         | 1    |
| 125   | 48           | f               | Hodgkin's lymphoma     | n.t.      | 6.6   | 11.8   | 282   | 0         | 1    |
| 126   | 46           | m               | NHL                    | n.t.      | 2.9   | 11.4   | 28    | 0         | 1    |
| 127   | 60           | m               | NHL                    | n.t.      | 7.8   | 10.5   | 723   | 0         | 1    |
| 128   | 36           | f               | Hodgkin's lymphoma     | n.t.      | 11.5  | 10.1   | 502   | 0         | 2    |
| 129   | 37           | m               | NHL                    | n.t.      | 8.8   | 12.9   | 391   | 0         | 1    |
| 130   | 64           | m               | NHL                    | n.t.      | 3.5   | 13.6   | 64    | 0         | 1    |
| 131   | 71           | m               | NHL                    | n.t.      | 8.5   | 13.6   | 228   | 0         | 1    |
| 132   | 23           | m               | Hodgkin's lymphoma     | n.t.      | 11.9  | 12.1   | 427   | 0         | 2    |
| 133   | 70           | m               | NHL                    | n.t.      | 8.2   | 16.0   | 289   | 0         | 1    |
| 134   | 27           | f               | Hodgkin's lymphoma     | n.t.      | 13.6  | 8.3    | 376   | 0         | 1    |
| 135   | 62           | m               | NHL                    | 46,XY     | 2.9   | 14.8   | 131   | 0         | 1    |
| 136   | 31           | f               | Suspected mastocytosis | n.t.      | 4.7   | 13.7   | 229   | 0         | 1    |

| No. #       | age   | gender | diagnosis                                    | karyotype | WBC<br>(G/L) | Hb<br>(g/dL) | Plt<br>(G/L) | Blast (%) |      |
|-------------|-------|--------|----------------------------------------------|-----------|--------------|--------------|--------------|-----------|------|
|             | (yrs) | (m/f)  |                                              |           |              |              |              | PB        | BM   |
| 137         | 72    | f      | Breast Cancer                                | n.t.      | 23.5         | 8.6          | 91           | 0         | 1    |
| 138         | 51    | m      | NHL                                          | n.t.      | 6.7          | 14.0         | 84           | 0         | 1    |
| 139         | 19    | m      | NHL                                          | n.t.      | 9.5          | 12.2         | 362          | n.t.      | 2    |
| 140         | 68    | f      | NHL                                          | n.t.      | 9.3          | 10.6         | 350          | 0         | 1    |
| 141         | 52    | m      | Ewing's sarcoma                              | n.t.      | 8.0          | 15.0         | 203          | 0         | 1    |
| 142         | 64    | m      | NHL                                          | n.t.      | 6.3          | 15.1         | 211          | n.t.      | 1    |
| 143         | 70    | m      | NHL                                          | n.t.      | 13.7         | 10.4         | 91           | 0         | 2    |
| 144         | 70    | m      | NHL                                          | n.t.      | 8.5          | 12.8         | 291          | n.t.      | 1    |
| 145         | 60    | m      | NHL                                          | n.t.      | 5.9          | 10.9         | 334          | 1         | 1    |
| 146         | 72    | m      | NHL                                          | n.t.      | 6.9          | 13.7         | 205          | n.t.      | 1    |
| 147         | 72    | m      | NHL                                          | n.t.      | 13.8         | 14.3         | 286          | 0         | 1    |
| 148         | 20    | m      | NHL                                          | n.t.      | 12.7         | 13.6         | 520          | 1         | 2    |
| 149         | 49    | f      | NHL                                          | 46,XX     | 2.3          | 8.4          | 541          | 0         | 1    |
| 150         | 52    | m      | MGUS                                         | n.t.      | 7.2          | 15.3         | 219          | 0         | 1    |
| 151         | 34    | m      | NHL                                          | n.t.      | 10.7         | 12.6         | 196          | 0         | 1    |
| 152         | 48    | m      | NHL                                          | 46,XY     | 12.4         | 15.7         | 196          | 0         | 1    |
| 153         | 47    | m      | Agranulocytosis                              | n.t.      | 1.7          | 10.6         | 399          | 0         | 2    |
| 154         | 19    | m      | NHL                                          | n.t.      | 11.5         | 13.4         | 287          | 0         | 1    |
| 155         | 34    | m      | NHL                                          | n.t.      | 18.1         | 12.8         | 312          | 0         | n.t. |
| 156         | 61    | m      | NHL                                          | n.t.      | 20.9         | 12.7         | 263          | 0         | 1    |
| 157         | 45    | m      | NHL                                          | n.t.      | 5.1          | 14.5         | 245          | 0         | 1    |
| 158         | 57    | f      | NHL                                          | n.t.      | 6.1          | 9.3          | 206          | 0         | 2    |
| 159         | 58    | m      | NHL                                          | n.t.      | 12.1         | 14.1         | 222          | n.t.      | 1    |
| 160         | 71    | m      | NHL                                          | complex   | 44.8         | 11.9         | 19           | 0         | 2    |
| 161         | 66    | m      | NHL                                          | n.t.      | 5.2          | 11.9         | 76           | 0         | 2    |
| 162         | 34    | m      | Suspected NHL                                | n.t.      | 4.8          | 11.2         | 189          | n.t.      | 3    |
| 163-<br>179 | n.a.  | n.a.   | Normal bone marrow<br>(purchased from Lonza) | n.t.      | n.t.         | n.t.         | n.t.         | n.t.      | n.t. |

| <b>No. #</b> | <b>age<br/>(yrs)</b> | <b>gender<br/>(m/f)</b> | <b>diagnosis</b>   | <b>karyotype</b> | <b>WBC<br/>(G/L)</b> | <b>Hb<br/>(g/dL)</b> | <b>Plt<br/>(G/L)</b> | <b>Blast (%)</b> |           |
|--------------|----------------------|-------------------------|--------------------|------------------|----------------------|----------------------|----------------------|------------------|-----------|
|              |                      |                         |                    |                  |                      |                      |                      | <b>PB</b>        | <b>BM</b> |
| 180-<br>205  | n.a.                 | n.a.                    | Cord blood samples | n.t.             | n.t.                 | n.t.                 | n.t.                 | n.t.             | n.t.      |

Abbreviations: No. #, patient number; WBC, white blood count; Hb, hemoglobin; Plt, platelet count; yrs, years; m, male; f, female; PB, peripheral blood; BM, bone marrow; ICUS, idiopathic cytopenia of undetermined significance; NHL, Non-Hodgkin's lymphoma; CTLC, cutaneous T-cell lymphoma; MGUS, monoclonal gammopathy of undetermined significance; n.t., not tested.

**Table S6**

Sequences of oligonucleotide primers used for qPCR analyses

| <b>Gene</b>  | <b>Sequence</b>            |
|--------------|----------------------------|
| huABCB10-fwd | GTGGCCTTCATCCGGAATTT       |
| huABCD10-rev | ATCGCAATCCGCTGTTTCTG       |
| huIL2Ra-fwd  | GGACTGCTCACGTTTCATCATGG    |
| huIL2Ra-rev  | GCTTTGAATGTGGCGTGTGG       |
| huCD9-fwd    | ACATCATCGGCGCAGTGG         |
| huCD9-rev    | GGTTCCTGCGGATAGCACAG       |
| huCD26-fwd   | TCAATATCTCCTGATGGGCAGTTT   |
| huCD26-rev   | TGTCATATGAAGCTGTGTAGGAATGC |
| huCD33-fwd   | CCCAGCTCTCTGTGCATGTGA      |
| huCD33-rev   | GAGTGCCAGGGATGAGGATTT      |
| huCD36-fwd   | TGATGAACAGCAGCAACATTCA     |
| huCD36-rev   | TCCTCAGCGTCCTGGGTTAC       |
| huCD44-fwd   | ATGGCCCAGATGGAGAAAGC       |
| huCD44-rev   | GGAATCACCACGTGCCCTTC       |
| huCD46-fwd   | CTTTCCTTCCTGGCGCTTTC       |
| huCD46-rev   | CAAATGTTGGTGGCTCCTCA       |
| huCD52-fwd   | TCCTCCTACTCACCATCAGCCTCCTG |
| huCD52-rev   | GGGCTGCTGGTTGGCTGGT        |
| huCD90-fwd   | CTGCAGCAGCGGAAGACC         |
| huCD90-rev   | GCAGGAGAGCGATGCTGATG       |
| huCD96-fwd   | GCTCTGTCTCCAGTCCCAGGAA     |
| huCD96-rev   | TCAGTGGAGGGTCTGTTGAGGA     |
| huCD114-fwd  | CTGACTTGGGCTGCCCTGAT       |
| huCD114-rev  | ACTGATGTGCCCGCACTCCT       |
| huCD115-fwd  | GCCGCCATCCACCTCTATGT       |
| huCD115-rev  | GAACACGACCACCTCCTGTGC      |
| huCD116-fwd  | CCACACCCAGCATTCTCCT        |
| huCD116-rev  | AGGCTGGTGCCACTGTTCG        |
| huCD117-fwd  | GCGTTCTGCTCCTACTGCTTCG     |
| huCD117-rev  | CCCTGGACTCACAGATGGTTGA     |
| huCD122-fwd  | GGGCTCTGCAGGACACTTCC       |
| huCD122-rev  | GGAGCAGCTCACAGGTTTGG       |
| huCD123-fwd  | CCACGAAGGCTGTTTCTTCCA      |
| huCD123-rev  | CTCCGGAACGCAGGACAGAG       |
| huCD131-fwd  | CCGTCCTCTGACCCAGCAT        |
| huCD131-rev  | AAGTGGTCTGGTCGGTGCT        |



| <b>Gene</b>   | <b>Sequence</b>             |
|---------------|-----------------------------|
| huCD133-fwd   | GCGGAATTCTTGACCGACTGA       |
| huCD133-rev   | CCAACGCCTCTTTGGTCTCC        |
| huCD135-fwd   | TCAGCTGGCAGATGCAGAAG        |
| huCD135-rev   | CATTCCGAAACACGGCCATC        |
| huCD151-fwd   | CGAGACCATGCCTCCAACAT        |
| huCD151-rev   | CCAATGACCCTCAGGTGCTC        |
| huCD164-fwd   | TAGCGCCCATCTCCAACGTA        |
| huCD164-rev   | ACGCAGCTGTTTCGACCTTC        |
| huCD184-fwd   | GCTACCTGGCCATCGTCCAC        |
| huCD184-rev   | AGGAGGGCAGGGATCCAGAC        |
| huCD200-fwd   | GTTTGGGTCATGGCAGCAGT        |
| huCD200-rev   | CATCCTGGGTCACCACTTGC        |
| huCD203c-fwd  | TGAGGATGCCCATGTGGAGTTCA     |
| huCD203c-rev  | TGGGAGGCAGAGGGCATGTG        |
| huCD221-fwd   | TGGCCGACGAGTGGAGAAAT        |
| huCD221-rev   | CTGCTGATAGTCGTTGCGGATG      |
| huCD243-fwd   | GCAGCAAAGGAGGCCAACAT        |
| huCD243-rev   | TCTGGCCACCAGAGAGCTGA        |
| huCD271-fwd   | CTGCACCGTGTGCGAGGAC         |
| huCD271-rev   | AATCCAACGGCCAGGGATCT        |
| huCD309-fwd   | GCGTGTGGCACCCACGATCA        |
| huCD309-rev   | GTTCCCTCCATTGGCCCGC         |
| huCLL1-fwd    | TGCTGCTAGCTGGGATGTGG        |
| huCLL1-rev    | GCTCCGCAAATGAGAAGCAA        |
| hu-MET-fwd    | CGG ACC CAA TCA TGA GCA CTG |
| hu-MET-rev    | ATC ACG GCG CGC TTC ACA G   |
| huEPO-R-fwd   | CCCGGGCAACTACAGCTTCT        |
| huEPO-R-rev   | GCAGGCGACACAGCT TCCAT       |
| huITGA6-fwd   | CCCGCTGGTTATAATCCTTCAA      |
| huITGA6-rev   | TGAACTCTTGAGGATAGCCCAGAT    |
| huITGA2B-fwd  | ATGGAGACACCCATGTGCAG        |
| huITGA2B-rev  | ACGCTGGCAGTGAGCTGAAG        |
| huITGB3-fwd   | TGTGTGCCTGGTGCTCTGAT        |
| huITGB3-rev   | CCTTCAGGTCACAGCGAGGT        |
| huITGB3BP-fwd | AACTGAAAGCAAAGAATCTACAACAAA |
| huITGB3BP-rev | TTGCATTATCTCCATGATTTCTTCTG  |
| huGP1BA-fwd   | TGCCTTCGGAGGTCTTTCTG        |

| Gene           | Sequence                 |
|----------------|--------------------------|
| huGP1BA-rev    | CAGGAGCAGCAAGAGGAGGA     |
| huIL-1RAP-fwd  | CCGGGCTCATTTTGAACAG      |
| huIL-1RAP-rev  | TTCTTCCGCATTCCTTGCAT     |
| huNPDC1-fwd    | GCACAGAGCGCGGAGATGTA     |
| huNPDC1-rev    | CAGCTCCTTGGGTGGCTCTT     |
| huOSM-R-fwd    | TGGGTGCTTCTCTGCTTCTG     |
| huOSM-R-rev    | CCACCCTCTGTGCCTGCAAT     |
| huROBO4-fwd    | CCTGGCAGTGGCTGTGGATA     |
| huROBO4-rev    | GGAGGGAGGTGATGAGGCATCT   |
| huBCR/ABL1-fwd | TCCGCTGACCATCAATAAGGA    |
| huBCR/ABL1-rev | CACTCAGACCCTGAGGCTCAA    |
| huABL1-fwd     | TGTATGATTTTGTGGCCAGTGGAG |
| huABL1-rev     | GCCTAAGACCCGGAGCTTTTCA   |
| huPDCD10-fwd   | TGAAGCTGAGACCACATCCA     |
| huPDCD10-rev   | TCTGGGCTGCAGACAGATTT     |
| huSELP-fwd     | CAGTCTGGGTTGGGCAGAAG     |
| huSELP-rev     | AAGATGGCTATTTGGCAGTTGG   |

Abbreviations: IL-2R, interleukin-2 receptor; CLL1, C-type lectin-like molecule-1; EPO-R, erythropoietin receptor; NPDC1, neural proliferation differentiation and control protein 1; IL-1RAP, interleukin-1 receptor accessory protein; OSMR, oncostatin M receptor; ROBO4, roundabout 4; fwd, forward; rev, reverse.

## Table S7

FISH probes used for detection of cytogenetic abnormalities in purified AML cells

| Chromosomal aberration | FISH probes*               |
|------------------------|----------------------------|
| inv(16) or -16         | CBFB t(16;16); inv(16)     |
| t(3;3)                 | MECOM t(3;3); inv(3)(3q26) |
| del(5q)                | 5q- (5q31; 5q33)           |
| t(8;21)                | RUNX1/RUNX1T t(8;21)       |

Abbreviations: FISH, fluorescence in situ hybridization; AML, acute myeloid leukemia.

\*FISH probes were purchased from Kretech (Amsterdam, The Netherlands).

**Table S8**FISH analysis of purified CD34<sup>+</sup>/CD38<sup>-</sup> and CD34<sup>+</sup>/CD38<sup>+</sup> AML cells

| No. # | AML variant | Chromosomal aberration | % of cells with abnormal karyotype by FISH |                                      |                                      |
|-------|-------------|------------------------|--------------------------------------------|--------------------------------------|--------------------------------------|
|       |             |                        | MNC                                        | CD34 <sup>+</sup> /CD38 <sup>-</sup> | CD34 <sup>+</sup> /CD38 <sup>+</sup> |
| #5    | AML M4eo    | inv(16)                | 88%                                        | 100%                                 | 100%                                 |
| #19   | AML M4eo    | inv(16)                | 70%                                        | 100%                                 | 100%                                 |
| #22   | AML M0      | t(3;3)                 | 80%                                        | 100%                                 | 100%                                 |
| #113  | AML M4      | -16                    | 81%                                        | 100%                                 | 100%                                 |
| #191  | sAML        | del(5q)                | 92%                                        | 100%                                 | 100%                                 |
| #210  | AML M1      | del(5q)                | 81%                                        | 100%                                 | 100%                                 |
| #264  | AML M1      | t(8;21)                | 100%                                       | 100%                                 | 100%                                 |

FISH analysis was performed as described in the text in this supplement. The percentage of interphases expressing the abnormal karyotype defined by FISH probes was determined by microscopy. AML samples obtained at diagnosis. Patients' numbers (#) refer to the patients' numbers shown in Table S3. Abbreviations: AML, acute myeloid leukemia; FISH, fluorescence in situ hybridization; No. #, patient number; MNC, mononuclear cells; sAML, secondary AML. The FAB category of AML (M0, M1, M4, M4eo) is also shown.

**Table S9A**

Expression of cytokine receptors on leukemic stem- and progenitor cells and comparison to normal bone marrow (BM) cells

| Expression of surface antigens on progenitor cells and stem cells (% positive cases in brackets) |       |                                      |                                      |                                      |                                      |                                      |                                      |                                      |                                      |     |  |
|--------------------------------------------------------------------------------------------------|-------|--------------------------------------|--------------------------------------|--------------------------------------|--------------------------------------|--------------------------------------|--------------------------------------|--------------------------------------|--------------------------------------|-----|--|
| Antigen                                                                                          | CD    | Normal control BM                    |                                      |                                      |                                      | AML                                  |                                      |                                      |                                      | CML |  |
|                                                                                                  |       | CD34 <sup>+</sup> /CD38 <sup>+</sup> | CD34 <sup>+</sup> /CD38 <sup>-</sup> | CD34 <sup>+</sup> /CD38 <sup>+</sup> | CD34 <sup>+</sup> /CD38 <sup>-</sup> | CD34 <sup>+</sup> /CD38 <sup>+</sup> | CD34 <sup>+</sup> /CD38 <sup>-</sup> | CD34 <sup>+</sup> /CD38 <sup>+</sup> | CD34 <sup>+</sup> /CD38 <sup>-</sup> |     |  |
| IL-2RA                                                                                           | CD25  | - (12)                               | - (8)                                | + (43)                               | + (48)                               | +/- (28)                             | + (93)                               |                                      |                                      |     |  |
| Endoglin                                                                                         | CD105 | + (100)                              | + (100)                              | + (85)                               | + (93)                               | + (100)                              | + (100)                              |                                      |                                      |     |  |
| TPOR                                                                                             | CD110 | -/+ (67)                             | -/+ (56)                             | - (0)                                | - (5)                                | - (22)                               | - (11)                               |                                      |                                      |     |  |
| G-CSFR                                                                                           | CD114 | + (50)                               | + (64)                               | + (88)                               | + (64)                               | + (68)                               | + (75)                               |                                      |                                      |     |  |
| M-CSFR                                                                                           | CD115 | - (0)                                | - (0)                                | - (14)                               | - (17)                               | - (20)                               | - (0)                                |                                      |                                      |     |  |
| GM-CSFR                                                                                          | CD116 | +/- (75)                             | -/+ (38)                             | +/- (67)                             | +/- (47)                             | +/- (46)                             | +/- (50)                             |                                      |                                      |     |  |
| KIT/SCFR                                                                                         | CD117 | + (100)                              | + (100)                              | + (99)                               | + (99)                               | + (98)                               | + (96)                               |                                      |                                      |     |  |
| IL-2RB                                                                                           | CD122 | - (0)                                | - (0)                                | - (6)                                | - (6)                                | - (10)                               | - (10)                               |                                      |                                      |     |  |
| IL-3RA                                                                                           | CD123 | + (91)                               | + (95)                               | + (99)                               | + (98)                               | + (96)                               | + (100)                              |                                      |                                      |     |  |
| CR-β-chain                                                                                       | CD131 | - (17)                               | - (0)                                | - (6)                                | - (0)                                | - (25)                               | - (0)                                |                                      |                                      |     |  |
| FLT3                                                                                             | CD135 | +/- (45)                             | +/- (40)                             | + (93)                               | + (91)                               | +/- (64)                             | + (64)                               |                                      |                                      |     |  |
| CXCR4                                                                                            | CD184 | +/- (68)                             | +/- (55)                             | + (75)                               | + (72)                               | + (82)                               | + (82)                               |                                      |                                      |     |  |
| IGF-1R                                                                                           | CD221 | -/+ (22)                             | -/+ (25)                             | - (19)                               | - (18)                               | -/+ (42)                             | -/+ (42)                             |                                      |                                      |     |  |
| NGFR                                                                                             | CD271 | - (0)                                | - (0)                                | - (0)                                | - (0)                                | - (11)                               | - (11)                               |                                      |                                      |     |  |
| KDR/VEGFR2                                                                                       | CD309 | - (0)                                | - (0)                                | - (0)                                | - (3)                                | - (10)                               | - (7)                                |                                      |                                      |     |  |
| FGFR2                                                                                            | CD332 | -/+ (20)                             | -/+ (20)                             | -/+ (33)                             | -/+ (33)                             | +/- (44)                             | +/- (44)                             |                                      |                                      |     |  |
| EPOR                                                                                             | n.c.  | +/- (50)                             | +/- (50)                             | - (3)                                | - (4)                                | - (25)                               | - (8)                                |                                      |                                      |     |  |
| OSMRB                                                                                            | n.c.  | - (13)                               | - (14)                               | +/- (52)                             | +/- (41)                             | -/+ (32)                             | +/- (44)                             |                                      |                                      |     |  |
| IL-1RAP                                                                                          | n.c.  | -/+ (36)                             | - (0)                                | + (79)                               | + (65)                               | + (95)                               | + (77)                               |                                      |                                      |     |  |
| MET/HGFR                                                                                         | n.c.  | - (0)                                | - (0)                                | - (0)                                | - (0)                                | - (0)                                | - (0)                                |                                      |                                      |     |  |

Expression of surface antigens on CD34<sup>+</sup>/CD38<sup>-</sup> and CD34<sup>+</sup>/CD38<sup>+</sup> bone marrow (BM) stem- and progenitor cells was examined by multi-color flow cytometry. Leukemic samples were obtained at diagnosis (AML: at least 6 cases per marker tested; CML: at least 5 cases per marker tested).

Control samples (normal BM; at least 5 cases per marker tested) included purchased CD34<sup>+</sup> BM cell subsets and BM cells obtained from cases with suspected hematologic neoplasm without persistent cytopenia. Results show the levels of expression of surface markers (as per score defined below) and as % of positive cases in each group (in brackets). Score of antibody reactivity: +, clear expression in majority of cases; +/-, weak expression in majority of cases; -/+, expression in minority of cases; -, no expression in a vast majority of cases. Abbreviations: AML, acute myeloid leukemia; CML, chronic myeloid leukemia; n.c., not yet clustered.

**Table S9B**

Estimation of sites per cell of cytokine receptors on leukemic stem cells

| Antigen    | CD    | AML CD34 <sup>+</sup> /CD38 <sup>-</sup> |                                                                 | CML CD34 <sup>+</sup> /CD38 <sup>-</sup> |                                                                 |
|------------|-------|------------------------------------------|-----------------------------------------------------------------|------------------------------------------|-----------------------------------------------------------------|
|            |       | median SI                                | median sites/cell (25 <sup>th</sup> -75 <sup>th</sup> quantile) | median SI                                | median sites/cell (25 <sup>th</sup> -75 <sup>th</sup> quantile) |
| IL-2RA     | CD25  | 1.4                                      | <100 (49-261)                                                   | 10.4                                     | 625 (133-1081)                                                  |
| Endoglin   | CD105 | 4.2                                      | 258 (164-579)                                                   | 10.9                                     | 658 (466-995)                                                   |
| TPOR       | CD110 | 1.0                                      | <100 (53-96)                                                    | 1.2                                      | <100 (54-81)                                                    |
| G-CSFR     | CD114 | 2.2                                      | 136 (84-226)                                                    | 2.8                                      | 171 (114-327)                                                   |
| M-CSFR     | CD115 | 1.1                                      | <100 (62-76)                                                    | 0.8                                      | <100 (64-66)                                                    |
| GM-CSFR    | CD116 | 1.3                                      | <100 (59-126)                                                   | 2.3                                      | 138 (46-235)                                                    |
| KIT/SCFR   | CD117 | 32.1                                     | 1932 (867-4026)                                                 | 15.5                                     | 939 (401-2174)                                                  |
| IL-2RB     | CD122 | 0.9                                      | <100 (46-66)                                                    | 0.8                                      | <100 (45-71)                                                    |
| IL-3RA     | CD123 | 12.2                                     | 738 (356-2173)                                                  | 9.9                                      | 598 (344-875)                                                   |
| CR-β-chain | CD131 | 1.0                                      | <100 (55-62)                                                    | 0.8                                      | <100 (38-54)                                                    |
| FLT3       | CD135 | 7.6                                      | 464 (264-1002)                                                  | 2.6                                      | 161 (106-222)                                                   |
| CXCR4      | CD184 | 2.2                                      | 133 (98-235)                                                    | 3.8                                      | 232 (120-422)                                                   |
| IGF-1R     | CD221 | 1.1                                      | <100 (59-112)                                                   | 1.7                                      | 104 (81-120)                                                    |
| NGFR       | CD271 | 0.7                                      | <100 (37-50)                                                    | 0.6                                      | <100 (34-48)                                                    |
| KDR/VEGFR2 | CD309 | 1.1                                      | <100 (56-76)                                                    | 1.1                                      | <100 (60-92)                                                    |
| FGFR2      | CD332 | 1.5                                      | <100 (83-129)                                                   | 1.8                                      | 112 (92-152)                                                    |
| EPOR       | n.c.  | 1.1                                      | <100 (61-78)                                                    | 1.4                                      | <100 (76-90)                                                    |
| OSMRB      | n.c.  | 1.2                                      | <100 (57-275)                                                   | 1.5                                      | <100 (79-122)                                                   |
| IL-1RAP    | n.c.  | 3.0                                      | 186 (91-698)                                                    | 3.1                                      | 190 (103-404)                                                   |
| MET/HGFR   | n.c.  | 0.9                                      | <100 (48-64)                                                    | 1.0                                      | <100 (60-66)                                                    |

Cytokine receptors on leukemic CD34<sup>+</sup>/CD38<sup>-</sup> cells in patients with AML and CML (leukemic samples obtained at diagnosis – see Table S9A) were analyzed by flow cytometry using PE-labeled mAb (specification of mAb is shown in Table S1). For estimation of the number of PE-molecules bound to the cell surface, the Quantibrite kit (BD Biosciences) was applied and staining indices were correlated with absolute numbers of PE-molecules as described in the supplemental methods. The PE-molecules on the cell surface correspond to sites per cell, assuming a ratio 1:1 for

PE-molecules per mAb. Results show the median staining index (ratio of PE-labeled mAb/isotype control mAb) and sites per cell including the range of the 25<sup>th</sup>–75<sup>th</sup> quantile of all tested patients in brackets. The detection limit was defined as 100 sites/cell which corresponds to a staining index of 1.6. Abbreviations: SI, staining index, AML, acute myeloid leukemia; CML, chronic myeloid leukemia; n.c., not yet clustered.

**Table S10**

Flow cytometry staining results of differentially expressed markers on normal CD34<sup>+</sup>/CD38<sup>-</sup> bone marrow (BM) HSC and cord blood (CB) CD34<sup>+</sup>/CD38<sup>-</sup> stem cells

| Antigen | Normal Bone Marrow<br>CD34 <sup>+</sup> /CD38 <sup>-</sup> HSC |                        | Cord Blood<br>CD34 <sup>+</sup> /CD38 <sup>-</sup> |                        |
|---------|----------------------------------------------------------------|------------------------|----------------------------------------------------|------------------------|
|         | % of patients positive<br>(No. of patients tested)             | Mean staining<br>index | % of patients positive<br>(No. of patients tested) | Mean staining<br>index |
| CD25    | 8% (25)                                                        | 0.9                    | 22% (9)                                            | 1.2                    |
| CD33    | 100% (15)                                                      | 14.3                   | 100% (14)                                          | 32.2                   |
| CD52    | 54% (24)                                                       | 3.2                    | 100% (9)                                           | 12.7                   |
| CD93    | 63% (8)                                                        | 2.3                    | 100% (2)                                           | 13.5                   |
| CD123   | 95% (21)                                                       | 4.3                    | 100% (14)                                          | 8.3                    |
| CD221   | 25% (8)                                                        | 2.0                    | 100% (14)                                          | 6.3                    |
| IL-1RAP | 0% (11)                                                        | 1.0                    | 89% (9)                                            | 3.4                    |
| HLA-DR  | 83% (6)                                                        | 3.3                    | 100% (6)                                           | 22.6                   |

Normal BM stem cells were purchased from Lonza. Abbreviations: CD, cluster of differentiation; No., number; CB, cord blood; HSC, hematopoietic stem cells; IL-1RAP, interleukin-1 receptor accessory protein; HLA-DR, human leukocyte antigen.

**Table S11**

Flow cytometry staining results of normal BM CD34<sup>+</sup>/CD38<sup>-</sup> and CD34<sup>+</sup>/CD38<sup>+</sup> cells

| Antigen | Normal Bone Marrow<br>CD34 <sup>+</sup> /CD38 <sup>-</sup> |                        | Normal Bone Marrow<br>CD34 <sup>+</sup> /CD38 <sup>+</sup> |                        |
|---------|------------------------------------------------------------|------------------------|------------------------------------------------------------|------------------------|
|         | % of patients positive<br>(No. of patients tested)         | Mean staining<br>index | % of patients positive<br>(No. of patients tested)         | Mean staining<br>index |
| CD18    | 71% (7)                                                    | 2.5                    | 100% (7)                                                   | 5.4                    |
| CD33    | 100% (15)                                                  | 14.3                   | 100% (15)                                                  | 20.9                   |
| CD90    | 85% (13)                                                   | 3.7                    | 8% (13)                                                    | 0.9                    |
| CD114   | 64% (11)                                                   | 2.2                    | 50% (12)                                                   | 4.4                    |
| CD117   | 100% (20)                                                  | 35.7                   | 100% (21)                                                  | 34.5                   |
| CD371   | 0% (9)                                                     | 0.8                    | 100% (9)                                                   | 6.1                    |
| HLA-DR  | 83% (6)                                                    | 3.3                    | 100% (6)                                                   | 10.7                   |
| IL-1RAP | 0% (11)                                                    | 1.0                    | 36% (11)                                                   | 1.5                    |
| NPDC1   | 50% (4)                                                    | 1.7                    | 0% (4)                                                     | 1.4                    |
| ROBO4   | 100% (6)                                                   | 3.6                    | 50% (6)                                                    | 1.7                    |

Normal BM stem cells were purchased from Lonza or obtained from patients with suspected BM neoplasm. Abbreviations: CD, cluster of differentiation; No, number; BM, bone marrow; HSC, hematopoietic stem cells; IL-1RAP, interleukin-1 receptor accessory protein; ROBO4, roundabout 4; HLA-DR, human leukocyte antigen.



**Table S12**

Antigen expression on mature cells as determined by flow cytometry

| Antigen      | Basophils | Eosinophils | T cells | B cells | Monocytes | Neutrophils |
|--------------|-----------|-------------|---------|---------|-----------|-------------|
| CD9          | +         | +           | +/-     | +/-     | +         | +           |
| CD25         | +         | -           | +/-     | +/-     | -         | -           |
| CD26         | +         | -           | +       | -       | -         | -           |
| CD33         | +         | +           | -       | -       | +         | +           |
| CD36         | +         | +           | +       | +       | +         | +           |
| CD44         | +         | +/-         | +       | +       | +         | +           |
| CD51/61      | -         | -           | -       | -       | +/-       | -           |
| CD52         | +/-       | +/-         | +       | +       | +         | -           |
| CD56         | -         | -           | -       | -       | -         | -           |
| CD61         | +/-       | +/-         | +/-     | +/-     | +         | +/-         |
| CD90         | -         | +/-         | -       | +       | +/-       | +/-         |
| CD95         | +         | -           | +/-     | -       | +         | +           |
| CD96         | -         | -           | +       | +/-     | -         | -           |
| CD105        | +/-       | -           | -       | +/-     | +         | +/-         |
| CD114        | -         | -           | -       | -       | +/-       | +           |
| CD115        | -         | -           | -       | -       | +         | +/-         |
| CD117        | -         | -           | -       | -       | -         | -           |
| CD122        | -         | -           | +/-     | +       | -         | -           |
| CD123        | +         | +/-         | -       | +/-     | +         | +/-         |
| CD129        | -         | -           | -       | -       | +/-       | +/-         |
| CD131        | +         | +           | -       | -       | +/-       | +           |
| CD133        | -         | -           | -       | -       | -         | -           |
| CD135        | +/-       | -           | -       | -       | -         | -           |
| CD150        | -         | -           | +/-     | +       | -         | -           |
| CD203c       | +         | -           | -       | -       | -         | -           |
| MET          | -         | -           | -       | -       | -         | -           |
| EPOR         | -         | -           | -       | -       | -         | -           |
| OSMR $\beta$ | -         | -           | -       | -       | +         | -           |

Peripheral blood cells from healthy donors (n=5) were stained with fluorochrome-labeled monoclonal antibodies (mAb) and analyzed by flow cytometry on FACSCanto II. Basophils were defined as CD123<sup>+</sup>/CD203c<sup>+</sup> cells, eosinophils were defined as forward and side-scatter high and highly 'auto-fluorescent' cells, T cells were defined as CD3<sup>+</sup>/CD19<sup>-</sup>, B cells were defined as CD19<sup>+</sup>/CD3<sup>-</sup>, Monocytes were defined as CD14<sup>+</sup>, and neutrophil granulocytes were defined as CD45<sup>+</sup> and side scatter high with exclusion of eosinophils and monocytes. Antigen expression of tested mAb: +: most of cells positive in most donors, +/-: positive subpopulation or weak expression; -: negative staining in most donors

**Table S13A**

Expression of cell surface antigens on normal BM HSC and LSC in AML and CML as determined by flow cytometry

| Antigen | Normal Bone Marrow<br>CD34 <sup>+</sup> /CD38 <sup>-</sup> HSC |                           | AML<br>CD34 <sup>+</sup> /CD38 <sup>-</sup>           |                           | CML<br>CD34 <sup>+</sup> /CD38 <sup>-</sup>           |                           |
|---------|----------------------------------------------------------------|---------------------------|-------------------------------------------------------|---------------------------|-------------------------------------------------------|---------------------------|
|         | % of patients<br>positive (No. of<br>patients tested)          | Mean<br>staining<br>index | % of patients<br>positive (No. of<br>patients tested) | Mean<br>staining<br>index | % of patients<br>positive (No. of<br>patients tested) | Mean<br>staining<br>index |
| CD9     | 14% (7)                                                        | 1.3                       | 63% (27)                                              | 4.2                       | 100% (30)                                             | 8.9                       |
| CD25    | 8% (25)                                                        | 0.9                       | 48% (164)                                             | 6.5                       | 93% (72)                                              | 13.3                      |
| CD26    | 0% (22)                                                        | 0.8                       | 10% (164)                                             | 2.7                       | 97% (74)                                              | 9.7                       |
| CD33    | 100% (15)                                                      | 14.3                      | 96% (90)                                              | 49.3                      | 100% (34)                                             | 49.6                      |
| CD36    | 57% (7)                                                        | 2.6                       | 45% (22)                                              | 7.8                       | 55% (38)                                              | 5.6                       |
| CD44    | 100% (15)                                                      | 113.6                     | 98% (63)                                              | 44.3                      | 100% (36)                                             | 91.1                      |
| CD47    | 100% (8)                                                       | 44.6                      | 100% (23)                                             | 43.1                      | 100% (33)                                             | 54.8                      |
| CD52    | 54% (24)                                                       | 3.3                       | 51% (172)                                             | 3.2                       | 81% (53)                                              | 3.2                       |
| CD56    | 8% (13)                                                        | 0.9                       | 18% (40)                                              | 5.0                       | 91% (33)                                              | 6.6                       |
| CD69    | 33% (3)                                                        | 2.1                       | 86% (7)                                               | 5.6                       | 100% (3)                                              | 3.4                       |
| CD90    | 85% (13)                                                       | 3.7                       | 13% (24)                                              | 1.4                       | 91% (11)                                              | 15.4                      |
| CD93    | 63% (8)                                                        | 2.3                       | 72% (32)                                              | 6.0                       | 86% (14)                                              | 9.7                       |
| CD96    | 0% (10)                                                        | 1.0                       | 40% (42)                                              | 4.1                       | 0% (11)                                               | 0.9                       |
| CD105   | 100% (10)                                                      | 6.6                       | 93% (45)                                              | 8.1                       | 100% (51)                                             | 12.8                      |
| CD114   | 64% (11)                                                       | 2.2                       | 64% (87)                                              | 3.5                       | 75% (24)                                              | 4.1                       |
| CD116   | 38% (8)                                                        | 1.9                       | 47% (17)                                              | 5.0                       | 50% (24)                                              | 2.8                       |
| CD117   | 100% (20)                                                      | 35.7                      | 99% (158)                                             | 50.4                      | 96% (46)                                              | 27.9                      |
| CD123   | 95% (21)                                                       | 4.3                       | 98% (167)                                             | 27.5                      | 100% (24)                                             | 10.6                      |
| CD164   | 86% (7)                                                        | 5.5                       | 14% (22)                                              | 4.0                       | 86% (7)                                               | 8.9                       |
| CD184   | 55% (22)                                                       | 2.6                       | 72% (78)                                              | 3.2                       | 82% (38)                                              | 5.2                       |
| CD371   | 0% (9)                                                         | 0.8                       | 68% (80)                                              | 9.1                       | 17% (6)                                               | 6.7                       |
| HLA-DR  | 83% (6)                                                        | 3.3                       | 71% (24)                                              | 7.0                       | 100% (21)                                             | 82.7                      |
| IL-1RAP | 0% (11)                                                        | 1.0                       | 65% (112)                                             | 8.8                       | 77% (62)                                              | 5.3                       |
| ROBO4   | 100% (6)                                                       | 3.6                       | 29% (42)                                              | 1.8                       | 85% (27)                                              | 2.9                       |

Expression of surface antigens on CD34<sup>+</sup>/CD38<sup>-</sup> stem cells was examined by multi-color flow cytometry. All leukemic samples obtained at diagnosis. Abbreviations: AML, acute myeloid leukemia; CML, chronic myeloid leukemia; CD, cluster of differentiation; No, number; HSC, hematopoietic stem cells; LSC, leukemic stem cells; IL-1RAP, interleukin-1 receptor accessory protein; ROBO4, roundabout 4; HLA-DR, human leukocyte antigen.

**Table S13B**

Expression of antigens on purified normal hematopoietic stem cells, cord blood CD34<sup>+</sup>/CD38<sup>-</sup> and leukemic CD34<sup>+</sup>/CD38<sup>-</sup> cells as determined by qPCR

| Antigen | Normal BM<br>CD34 <sup>+</sup> /CD38 <sup>-</sup> | Cord Blood<br>CD34 <sup>+</sup> /CD38 <sup>-</sup> | AML<br>CD34 <sup>+</sup> /CD38 <sup>-</sup> | CML<br>CD34 <sup>+</sup> /CD38 <sup>-</sup> |
|---------|---------------------------------------------------|----------------------------------------------------|---------------------------------------------|---------------------------------------------|
| CD9     | +                                                 | +                                                  | n.t.                                        | +                                           |
| CD25    | +                                                 | +                                                  | +                                           | +                                           |
| CD26    | n.t.                                              | -                                                  | -                                           | +                                           |
| CD33    | -                                                 | +                                                  | +                                           | +                                           |
| CD36    | -                                                 | +                                                  | n.t.                                        | +                                           |
| CD44    | +                                                 | +                                                  | +                                           | +                                           |
| CD52    | +                                                 | +                                                  | +                                           | +                                           |
| CD90    | +                                                 | +                                                  | -                                           | -                                           |
| CD96    | -                                                 | -                                                  | +                                           | -                                           |
| CD114   | -                                                 | -                                                  | +                                           | +                                           |
| CD116   | -                                                 | -                                                  | +                                           | -                                           |
| CD117   | +                                                 | +                                                  | +                                           | +                                           |
| CD123   | -                                                 | -                                                  | +                                           | +                                           |
| CD164   | +                                                 | +                                                  | n.t.                                        | +                                           |
| CD184   | +                                                 | +                                                  | +                                           | +                                           |
| CD371   | +                                                 | +                                                  | +                                           | -                                           |
| IL-1RAP | -                                                 | +                                                  | +                                           | -                                           |
| ROBO4   | -                                                 | -                                                  | -                                           | +                                           |
| NPDC1   | -                                                 | -                                                  | +                                           | +                                           |

CD34<sup>+</sup>/CD38<sup>-</sup> cells from patients with AML (n=14), CML (n=4) (leukemic samples obtained at diagnosis or relapse) and from normal bone marrow (n=3) and cord blood (n=4) were sorted by flow cytometry and then conducted to qPCR analysis. Results are expressed as + (relative 'over-expression') and - (relative 'under-expression'). Abbreviations: qPCR, quantitative polymerase chain reaction; BM, bone marrow; AML, acute myeloid leukemia; CML, chronic myeloid leukemia; n.t., not tested.

**Table S14A**

Expression of novel and established stem cell antigens on AML stem cells – comparison between flow cytometry data and gene chip results

|           |      | Expression of cell surface markers on stem cells (mRNA and protein level) |      |                                                   |      |                                                   |      |
|-----------|------|---------------------------------------------------------------------------|------|---------------------------------------------------|------|---------------------------------------------------|------|
|           |      | AML #210*<br>CD34 <sup>+</sup> /CD38 <sup>-</sup>                         |      | AML #173*<br>CD34 <sup>+</sup> /CD38 <sup>-</sup> |      | AML #102*<br>CD34 <sup>+</sup> /CD38 <sup>-</sup> |      |
| Antigen   | CD   | gene chip                                                                 | flow | gene chip                                         | flow | gene chip                                         | flow |
| IL-1RAP   | n.c. | +                                                                         | +/-  | +                                                 | -    | +                                                 | +    |
| IL-2RA    | CD25 | -/+                                                                       | -    | +/-                                               | +/-  | +                                                 | +    |
| DPPIV     | CD26 | +/-                                                                       | -    | +/-                                               | -    | +/-                                               | -    |
| Campath-1 | CD52 | +/-                                                                       | +    | +/-                                               | +/-  | -                                                 | -    |

Comparison of expression of stem cell markers in CD34<sup>+</sup>/CD38<sup>-</sup> AML stem cells by multi-color flow cytometry and microarray studies. Leukemic samples obtained at diagnosis. Gene chip results were scored and normalized to normal CD34<sup>+</sup>/CD38<sup>-</sup> bone marrow cells: -, less than 50% expression compared to normal cells; -/+, 50-100%; +/-, 101-200%; +, >200% compared to normal cells. Flow cytometry results are presented as staining index (SI) and were graded using the following score: -, 0-1.3; +/-, 1.31-3; +, 3.01-10.

\*Patients' numbers (#) refer to the patients' numbers defined in Table S3. Abbreviations: AML, acute myeloid leukemia; n.c., not yet clustered; IL-1RAP, interleukin-1 receptor-associated protein; IL-2RA, IL-2 receptor alpha chain; DPPIV; dipeptidyl peptidase IV; flow, flow cytometry.

**Table S14B**

Expression of novel and established stem cell antigens on CML stem cells – comparison between flow cytometry data and gene chip results

|                |       | Expression of surface markers on stem cells (mRNA and protein level) |      |                                                 |      |                                                 |      |
|----------------|-------|----------------------------------------------------------------------|------|-------------------------------------------------|------|-------------------------------------------------|------|
|                |       | CML #8<br>CD34 <sup>+</sup> /CD38 <sup>-</sup>                       |      | CML #11<br>CD34 <sup>+</sup> /CD38 <sup>-</sup> |      | CML #21<br>CD34 <sup>+</sup> /CD38 <sup>-</sup> |      |
| Antigen        | CD    | gene chip                                                            | flow | gene chip                                       | flow | gene chip                                       | flow |
| IL-1RAP        | n.c.  | +/-                                                                  | +    | +/-                                             | -    | +                                               | +    |
| Tetraspanin 29 | CD9   | -/+                                                                  | +    | -/+                                             | +/-  | +/-                                             | +    |
| IL-2RA         | CD25  | +                                                                    | +    | +                                               | +    | +                                               | +    |
| DPPIV          | CD26  | +                                                                    | +    | +/-                                             | +    | +                                               | +    |
| Siglec-3       | CD33  | +/-                                                                  | +    | +/-                                             | +    | +/-                                             | +    |
| KIT/SCFR       | CD117 | -                                                                    | +    | -                                               | -    | -                                               | +/-  |

Comparison of expression of stem cell markers on CD34<sup>+</sup>/CD38<sup>-</sup> CML stem cells by multi-color flow cytometry and microarray studies. Leukemic samples obtained at diagnosis. Gene chip results were scored and normalized to normal CD34<sup>+</sup>/CD38<sup>-</sup> bone marrow cells: -, less than 50% expression compared to normal cells; -/+, 50-100%; +/-, 101-200%; +, >200% compared to normal cells. Flow cytometry results are presented as staining index (SI) and were graded using the following score: -, 0-1.3; +/-, 1.31-3; +, 3.01-10.

\*Patients' numbers (#) refer to the patients' numbers defined in Table S2. Abbreviations: CML, chronic myeloid leukemia; n.c., not yet clustered; IL-1RAP, interleukin-1 receptor-associated protein; IL-2RA, IL-2 receptor alpha chain; DPPIV; dipeptidyl peptidase IV; SCFR, stem cell factor receptor; flow, flow cytometry.

**Table S15**

Correlation between surface marker expression on CD34<sup>+</sup>/CD38<sup>-</sup> cells and *FLT3* mutation status in AML

| Marker  | Mean staining index (n) |                           |                          | p value<br><i>FLT3</i><br>ITD vs.<br>wt | Mean percentage of positive cells<br>(n) |                           |                          | p value<br><i>FLT3</i><br>ITD vs.<br>wt |
|---------|-------------------------|---------------------------|--------------------------|-----------------------------------------|------------------------------------------|---------------------------|--------------------------|-----------------------------------------|
|         | Normal<br>BM            | AML<br><i>FLT3</i><br>ITD | AML<br><i>FLT3</i><br>wt |                                         | Normal<br>BM                             | AML<br><i>FLT3</i><br>ITD | AML<br><i>FLT3</i><br>wt |                                         |
| CD25    | 0.9 (25)                | 17.7 (39)                 | 3.6 (115)                | <0.001**                                | 6.8 (25)                                 | 60.6 (39)                 | 26.5 (115)               | <0.001**                                |
| CD26    | 0.8 (22)                | 7.9 (40)                  | 1.2 (115)                | <0.001**                                | 1.5 (22)                                 | 30.5 (40)                 | 3.2 (115)                | <0.001**                                |
| CD33    | 14.3 (15)               | 93.2 (21)                 | 42.6 (62)                | 0.003 **                                | 93.8 (15)                                | 92.8 (21)                 | 74.8 (62)                | <0.001**                                |
| CD52    | 3.3 (24)                | 3.6 (41)                  | 3.0 (119)                | n.s.                                    | 43.1 (24)                                | 43.9 (41)                 | 28.9 (119)               | 0.052                                   |
| CD61    | 1.0 (12)                | 0.7 (14)                  | 1.1 (41)                 | n.s.                                    | 11.6 (12)                                | 2.4 (14)                  | 10.6 (41)                | 0.015 *                                 |
| CD96    | 1.0 (10)                | 6.4 (11)                  | 2.4 (28)                 | 0.100                                   | 2.2 (10)                                 | 55.5 (11)                 | 18.7 (28)                | 0.022 *                                 |
| CD105   | 6.6 (10)                | 3.5 (12)                  | 10.1 (30)                | 0.015 *                                 | 86.4 (10)                                | 61.9 (12)                 | 81.1 (30)                | 0.040 *                                 |
| CD117   | 35.7 (20)               | 19.3 (36)                 | 58.9 (111)               | <0.001**                                | 96.5 (20)                                | 85.2 (36)                 | 94.5 (111)               | <0.001**                                |
| CD123   | 4.3 (21)                | 62.8 (37)                 | 20.1 (118)               | <0.001**                                | 64.3 (21)                                | 92.1 (37)                 | 85.2 (118)               | <0.001**                                |
| CD133   | 17.6 (15)               | 14.8 (34)                 | 20.8 (98)                | 0.003 **                                | 99.0 (15)                                | 58.9 (34)                 | 86.5 (98)                | 0.003 **                                |
| CD184   | 2.6 (22)                | 12.5 (17)                 | 3.3 (59)                 | 0.063                                   | 42.9 (22)                                | 32.3 (17)                 | 43.0 (59)                | n.s.                                    |
| IL-1RAP | 1.0 (11)                | 17.4 (28)                 | 6.3 (76)                 | <0.001**                                | 2.0 (11)                                 | 82.0 (28)                 | 43.0 (76)                | <0.001**                                |

Normal bone marrow CD34<sup>+</sup>/CD38<sup>-</sup> cells and CD34<sup>+</sup>/CD38<sup>-</sup> cells from AML patients (samples obtained at diagnosis or relapse) with mutated *FLT3* and wild type *FLT3* were analyzed for marker expression with flow cytometry. Pairwise Wilcoxon rank-sum test between subgroups was performed when Kruskal-Wallis test showed significant differences (p<0.05). P-values show results of pairwise Wilcoxon rank-sum-test between AML with mutated *FLT3* vs. wild type *FLT3* corrected for multiple testing with Benjamini-Hochberg method.

\*, significant difference with p < 0.05; \*\*, highly significant with p < 0.01. Abbreviations: n, number of tested patients in each subgroup per marker; wt, wild type; n.s., not significant in Kruskal-Wallis test or pairwise Wilcoxon rank-sum test.

**Table S16**

AML CD34<sup>+</sup>/CD38<sup>-</sup>: marker expression differences in AML subgroups with *NPM1* mutation vs. *NPM1* wt

| Marker  | Mean staining index (n) |                     |                    | p value  | Mean percentage of positive cells (n) |           |                     | p value  |
|---------|-------------------------|---------------------|--------------------|----------|---------------------------------------|-----------|---------------------|----------|
|         | Normal BM               | AML <i>NPM1</i> mut | AML <i>NPM1</i> wt |          | <i>NPM1</i> mut vs. wt                | Normal BM | AML <i>NPM1</i> mut |          |
| CD25    | 0.9 (25)                | 12.1 (47)           | 4.5 (122)          | 0.002 ** | 6.8 (25)                              | 47.9 (47) | 27.7 (122)          | <0.001** |
| CD26    | 0.8 (22)                | 6.5 (47)            | 1.2 (122)          | <0.001** | 1.5 (22)                              | 20.9 (47) | 4.8 (122)           | <0.001** |
| CD33    | 14.3 (15)               | 98.1 (19)           | 37.0 (46)          | 0.038 *  | 93.8 (15)                             | 84.9 (19) | 77.7 (46)           | 0.021*   |
| CD96    | 1.0 (10)                | 5.7 (11)            | 1.9 (19)           | 0.011 *  | 2.2 (10)                              | 50.3 (11) | 14.8 (19)           | 0.016*   |
| CD117   | 35.7 (20)               | 27.5 (42)           | 59.3 (98)          | 0.002 ** | 96.5 (20)                             | 91.6 (42) | 93.2 (98)           | n.s.     |
| CD123   | 4.3 (21)                | 54.2 (43)           | 19.6 (97)          | 0.002 ** | 64.3 (21)                             | 89.0 (43) | 85.1 (97)           | 0.006 ** |
| CD371   | 0.8 (9)                 | 4.1 (26)            | 11.3 (57)          | 0.042 *  | 4.6 (9)                               | 33.0 (26) | 46.8 (57)           | 0.169    |
| IL-1RAP | 1.0 (11)                | 11.6 (36)           | 7.8 (79)           | 0.098    | 2.0 (11)                              | 64.7 (36) | 46.9 (79)           | 0.007 ** |

Normal bone marrow CD34<sup>+</sup>/CD38<sup>-</sup> cells and CD34<sup>+</sup>/CD38<sup>-</sup> leukemic stem cells obtained from AML patients (samples obtained at diagnosis or relapse) with *NPM1* mutation and wild type *NPM1* were analyzed for surface marker expression by flow cytometry. Pair-wise Wilcoxon rank-sum test was performed as post-hoc analysis when Kruskal-Wallis test showed significant differences ( $p < 0.05$ ). P-values show results of pairwise Wilcoxon rank-sum-test between AML with mutated *NPM1* vs. wild type *NPM1* corrected for multiple testing with Benjamini-Hochberg method.

\*, significant difference with  $p < 0.05$ ; \*\*, highly significant with  $p < 0.01$ .

Abbreviations: n, number of tested patients in each subgroup per marker; mut, mutated; wt, wild type; n.s., not significant in Kruskal-Wallis test or pairwise Wilcoxon rank-sum test.

**Table S17**

Correlations between surface marker expression on CD34<sup>+</sup>/CD38<sup>-</sup> cells and the karyotype (complex vs. non-complex) in our patients with AML

| Marker | Mean staining index (n) |                       |                           | p value | Mean percentage of positive cells (n) |           |                       | p value |
|--------|-------------------------|-----------------------|---------------------------|---------|---------------------------------------|-----------|-----------------------|---------|
|        | Normal BM               | AML complex karyotype | AML non-complex karyotype |         | Complex vs. non-complex               | Normal BM | AML complex karyotype |         |
| CD26   | 0.8 (22)                | 0.8 (26)              | 2.9 (152)                 | 0.017 * | 1.5 (22)                              | 2.4 (26)  | 10.0 (152)            | 0.013 * |
| CD117  | 35.7 (20)               | 72.3 (24)             | 47.4 (144)                | 0.013 * | 96.5 (20)                             | 96.0 (24) | 90.8 (144)            | n.s.    |
| CD325  | 3.3 (10)                | 3.2 (11)              | 2.3 (39)                  | 0.094   | 46.5 (10)                             | 39.6 (11) | 25.0 (39)             | 0.091   |

Normal bone marrow CD34<sup>+</sup>/CD38<sup>-</sup> cells and CD34<sup>+</sup>/CD38<sup>-</sup> leukemic stem cells obtained from AML patients (samples obtained at diagnosis or relapse) with complex karyotype ( $\geq 3$  cytogenetic aberrations) and patients with a non-complex karyotype (0-2 cytogenetic aberrations) were analyzed for surface marker expression by flow cytometry. P values show results of pair-wise Wilcoxon rank-sum test that was performed as post-hoc analysis when Kruskal-Wallis test showed significant differences ( $p < 0.05$ ). P-values show results of pairwise Wilcoxon rank-sum-test between AML with mutated complex karyotype vs. AML with non-complex karyotype corrected for multiple testing with Benjamini-Hochberg method.

\*, significant difference with  $p < 0.05$ ;

Abbreviations: n, number of tested patients in each subgroup per marker; n.s., not significant in Kruskal-Wallis test or pairwise Wilcoxon rank-sum test.



**Table S18**

Expression of surface target antigens on leukemic stem- and progenitor cells and comparison to normal bone marrow (BM) cells

| Expression of surface antigens on progenitor cells and stem cells (% positive cases in brackets) |       |                                      |       |                                      |       |                                      |      |                                      |      |                                      |                                      |   |       |
|--------------------------------------------------------------------------------------------------|-------|--------------------------------------|-------|--------------------------------------|-------|--------------------------------------|------|--------------------------------------|------|--------------------------------------|--------------------------------------|---|-------|
| Antigen                                                                                          | CD    | Normal control BM                    |       |                                      |       | AML                                  |      |                                      |      | CML                                  |                                      |   |       |
|                                                                                                  |       | CD34 <sup>+</sup> /CD38 <sup>+</sup> |       | CD34 <sup>+</sup> /CD38 <sup>-</sup> |       | CD34 <sup>+</sup> /CD38 <sup>+</sup> |      | CD34 <sup>+</sup> /CD38 <sup>-</sup> |      | CD34 <sup>+</sup> /CD38 <sup>+</sup> | CD34 <sup>+</sup> /CD38 <sup>-</sup> |   |       |
| IL-2RA                                                                                           | CD25  | -                                    | (12)  | -                                    | (8)   | +                                    | (43) | +                                    | (48) | +/-                                  | (28)                                 | + | (93)  |
| DPPIV                                                                                            | CD26  | -                                    | (0)   | -                                    | (0)   | -/+                                  | (8)  | -/+                                  | (10) | +/-                                  | (30)                                 | + | (97)  |
| Siglec-3                                                                                         | CD33  | +/-                                  | (100) | +/-                                  | (100) | +                                    | (98) | +                                    | (96) | +                                    | (100)                                | + | (100) |
| Pgp-1                                                                                            | CD44  | +                                    | (100) | +                                    | (100) | +                                    | (98) | +                                    | (98) | +                                    | (100)                                | + | (100) |
| Campath-1                                                                                        | CD52  | +/-                                  | (48)  | +/-                                  | (54)  | +/-                                  | (44) | +/-                                  | (51) | -                                    | (11)                                 | + | (81)  |
| MXRA4                                                                                            | CD93  | +/-                                  | (75)  | +/-                                  | (63)  | +                                    | (81) | +                                    | (72) | +/-                                  | (71)                                 | + | (86)  |
| TACTILE                                                                                          | CD96  | -                                    | (0)   | -                                    | (0)   | +                                    | (51) | +                                    | (40) | -                                    | (9)                                  | - | (0)   |
| KIT/SCFR                                                                                         | CD117 | +                                    | (100) | +                                    | (100) | +                                    | (99) | +                                    | (99) | +                                    | (98)                                 | + | (96)  |
| IL-3RA                                                                                           | CD123 | +                                    | (91)  | +                                    | (95)  | +                                    | (99) | +                                    | (98) | +                                    | (96)                                 | + | (100) |
| FLT3                                                                                             | CD135 | +/-                                  | (45)  | +/-                                  | (40)  | +                                    | (93) | +                                    | (91) | +/-                                  | (64)                                 | + | (64)  |
| CXCR4                                                                                            | CD184 | +/-                                  | (68)  | +/-                                  | (55)  | +                                    | (75) | +                                    | (72) | +                                    | (82)                                 | + | (82)  |
| PD1                                                                                              | CD279 | -                                    | (0)   | -                                    | (0)   | -                                    | (9)  | -                                    | (18) | -                                    | (0)                                  | - | (7)   |
| PD-L1                                                                                            | CD274 | +                                    | (100) | +                                    | (100) | +                                    | (84) | +                                    | (95) | +                                    | (89)                                 | + | (100) |
| PD-L2                                                                                            | CD273 | -                                    | (0)   | -                                    | (0)   | -                                    | (0)  | -                                    | (0)  | -                                    | (0)                                  | - | (0)   |
| CLL-1                                                                                            | CD371 | +                                    | (100) | -                                    | (0)   | +                                    | (92) | +                                    | (68) | +                                    | (67)                                 | - | (17)  |
| IL-1RAP                                                                                          | n.c.  | -/+                                  | (36)  | -                                    | (0)   | +                                    | (79) | +                                    | (65) | +                                    | (95)                                 | + | (77)  |

Expression of surface antigens on CD34<sup>+</sup>/CD38<sup>-</sup> and CD34<sup>+</sup>/CD38<sup>+</sup> bone marrow (BM) stem- and progenitor cells was examined by multi-color flow cytometry. All leukemic samples obtained at diagnosis (AML: at least 11 cases per marker tested; CML: at least 6 cases per marker tested). Control samples (normal BM; at least 7 cases per marker tested) included purchased CD34<sup>+</sup> BM cell subsets and BM cells obtained from cases with suspected hematologic neoplasm without persistent cytopenia. Results show the levels of expression of surface markers (as per score defined below) and as % of positive cases in each group (in brackets). Score of antibody reactivity: +, clear expression

in majority of cases; +/-, weak expression in majority of cases; -/+, expression in minority of cases; -, no expression in a vast majority of cases. Abbreviations: AML, acute myeloid leukemia; CML, chronic myeloid leukemia; n.c., not yet clustered.

**Table S19**

Target spectrum of kinase inhibitors, fusion proteins and targeting antibodies

| Drug                    | Major targets                                                                                                                                                      | References |
|-------------------------|--------------------------------------------------------------------------------------------------------------------------------------------------------------------|------------|
| a) Kinase Inhibitors    |                                                                                                                                                                    |            |
| Midostaurin             | ACK1, FLT3, JAK3, KIT, PDGFRb, RET, TNK1, TRK-A/C, VEGFR2, BLK, CSF1R, FGFR2, IGF-1R, JAK2, LCK, LTK, LYN, ROS, SYK, TRK-B, FER, FYN, HCK, MUSK, PDGFRA, SRC, TYK2 | 34         |
| Gilteritinib            | FLT3, LTK, AXL, ELM4-ALK                                                                                                                                           | 35         |
| b) Fusion proteins      |                                                                                                                                                                    |            |
| Denileukin-diftitox     | CD25 positive cells                                                                                                                                                | 36         |
| c) Targeting antibodies |                                                                                                                                                                    |            |
| Gemtuzumab/ozogamicin   | CD33 positive cells                                                                                                                                                | 37         |
| Alemtuzumab             | CD52 positive cells                                                                                                                                                | 38         |

Abbreviations: ACK1, activated CDC42 kinase 1; FLT3, fms like tyrosine kinase 3; JAK, janus kinase; PDGFR, platelet-derived growth factor receptors; TNK1, tyrosine kinase non-receptor 1; TRK, tropomyosin receptor kinase; VEGFR, vascular endothelial growth factor receptors; BLK, B lymphoid tyrosine kinase; CSFR1, colony stimulating factor 1 receptor; FGFR, fibroblast growth factor receptor; IGR-1R, insulin-like growth factor receptor; LCK, lymphocyte-specific protein tyrosine kinase; LTK, leukocyte tyrosine kinase;

LYN, Lck/Yes novel tyrosine kinase; SYK, spleen tyrosine kinase; HCK, The hematopoietic cell kinase; MuSK, muscle-specific kinase; scr, sarkoma.

**Table S20**

Aberrantly expressed surface markers on CD34<sup>+</sup>/CD38<sup>-</sup> cells in AML or CML cells injected in NSG mice

| disease | No. # | sample at | Expression on CD34 <sup>+</sup> /CD38 <sup>-</sup> cells as staining index (SI*) |            |               |                |           |              |            |         |
|---------|-------|-----------|----------------------------------------------------------------------------------|------------|---------------|----------------|-----------|--------------|------------|---------|
|         |       |           | CD25 IL-2RA                                                                      | CD26 DPPIV | CD33 Siglec-3 | CD52 Campath-1 | CD117 KIT | CD123 IL-3RA | CD135 FLT3 | IL-1RAP |
| AML     | 222   | D         | +/-                                                                              | -          | n.t.          | +/-            | ++        | ++           | n.t.       | ++      |
| AML     | 211   | D         | +                                                                                | -          | ++            | +/-            | ++        | +            | n.t.       | n.t.    |
| AML     | 210   | D         | -                                                                                | -          | ++            | +              | ++        | +            | +/-        | +/-     |
| AML     | 126   | D         | ++                                                                               | ++         | ++            | +              | n.t.      | ++           | n.t.       | ++      |
| AML     | 179   | D         | +/-                                                                              | -          | n.t.          | +/-            | n.t.      | n.t.         | n.t.       | n.t.    |
|         |       |           |                                                                                  |            |               |                |           |              |            |         |
| CML     | 21    | D         | +                                                                                | +          | ++            | +/-            | +/-       | n.t.         | +/-        | +       |
| CML     | 11    | D         | ++                                                                               | +          | ++            | -              | -         | n.t.         | +/-        | -       |
| CML     | 8     | D         | ++                                                                               | ++         | ++            | +/-            | +         | n.t.         | n.t.       | +       |

CD34<sup>+</sup>/CD38<sup>-</sup> cells obtained from AML and CML patients were analyzed for surface marker expression by multicolor flow cytometry. The score is related to the expression of surface markers on AML and CML CD34<sup>+</sup>/CD38<sup>-</sup> cells. For NSG experiments, T-cell depleted AML MNC or CD34<sup>+</sup> enriched CML cells were injected in NSG mice. SI\* was calculated as ratio of median fluorescence intensities (MFI) obtained with specific monoclonal antibody (mAb) and control mAb (isotype control). SI values were graded using the following score: -, 0-1.3; +/-, 1.31-3; +, 3.01-10; ++, >10. Patients' numbers (#) refer to the patients' numbers defined in Table S2 and S3. Abbreviations: No. #, patient number; SI, staining index; D, diagnosis; AML, acute myeloid leukemia; CML, chronic myeloid leukemia; n.t., not tested.

**Table S21**

Phenotype of pre-leukemic neoplastic stem cells (pre-L-NSC) in patients with MDS and comparison to AML LSC as determined by flow cytometry

| Antigen | Normal Bone Marrow<br>CD34 <sup>+</sup> /CD38 <sup>-</sup> |                     | MDS<br>CD34 <sup>+</sup> /CD38 <sup>-</sup>     |                     | AML<br>CD34 <sup>+</sup> /CD38 <sup>-</sup>     |                     |
|---------|------------------------------------------------------------|---------------------|-------------------------------------------------|---------------------|-------------------------------------------------|---------------------|
|         | % of patients positive (No. of patients tested)            | Mean staining index | % of patients positive (No. of patients tested) | Mean staining index | % of patients positive (No. of patients tested) | Mean staining index |
| CD25    | 8% (25)                                                    | 0.9                 | 41% (34)                                        | 2.9                 | 48% (164)                                       | 6.5                 |
| CD26    | 0% (22)                                                    | 0.8                 | 6% (32)                                         | 0.8                 | 10% (164)                                       | 2.7                 |
| CD33    | 100% (15)                                                  | 14.3                | 100% (18)                                       | 40.7                | 96% (90)                                        | 49.3                |
| CD44    | 100% (15)                                                  | 113.6               | 100% (15)                                       | 37.4                | 98% (63)                                        | 44.3                |
| CD52    | 54% (24)                                                   | 3.3                 | 56% (41)                                        | 3.0                 | 51% (172)                                       | 3.2                 |
| CD90    | 85% (13)                                                   | 3.7                 | 100% (5)                                        | 12.2                | 13% (24)                                        | 1.4                 |
| CD96    | 0% (10)                                                    | 1.0                 | 14% (7)                                         | 1.2                 | 40% (42)                                        | 4.1                 |
| CD105   | 100% (10)                                                  | 6.6                 | 100% (13)                                       | 14.7                | 93% (45)                                        | 8.1                 |
| CD114   | 64% (11)                                                   | 2.2                 | 94% (18)                                        | 8.5                 | 64% (87)                                        | 3.5                 |
| CD117   | 100% (20)                                                  | 35.7                | 100% (29)                                       | 95.3                | 99% (158)                                       | 50.4                |
| CD123   | 95% (21)                                                   | 4.3                 | 100% (34)                                       | 11.0                | 98% (167)                                       | 27.5                |
| CD135   | 40% (10)                                                   | 3.4                 | 100% (8)                                        | 16.6                | 91% (35)                                        | 13.2                |
| CD184   | 55% (22)                                                   | 2.6                 | 86% (14)                                        | 4.0                 | 72% (78)                                        | 3.2                 |
| CD221   | 25% (8)                                                    | 2.0                 | 33% (9)                                         | 1.9                 | 18% (28)                                        | 2.0                 |
| CD371   | 0% (9)                                                     | 0.8                 | 54% (13)                                        | 2.0                 | 68% (80)                                        | 9.1                 |
| IL-1RAP | 0% (11)                                                    | 1.0                 | 40% (20)                                        | 2.0                 | 65% (112)                                       | 8.8                 |
| NPDC1   | 50% (4)                                                    | 1.7                 | 67% (3)                                         | 4.2                 | 76% (21)                                        | 3.5                 |
| ROBO4   | 100% (6)                                                   | 3.6                 | 78% (9)                                         | 3.0                 | 29% (42)                                        | 1.8                 |

Expression of surface antigens on CD34<sup>+</sup>/CD38<sup>-</sup> stem cells was examined by multi-color flow cytometry. All leukemic samples obtained at diagnosis. Abbreviations: AML, acute myeloid leukemia; MDS, myelodysplastic syndrome; CD, cluster of differentiation; No., number; LSC, leukemic stem cells; HSC, hematopoietic stem cells; IL-1RAP, interleukin-1 receptor accessory protein; ROBO4, roundabout 4.

## References

1. Herrmann H, Sadovnik I, Cerny-Reiterer S, et al. Dipeptidylpeptidase IV (CD26) defines leukemic stem cells (LSC) in chronic myeloid leukemia. *Blood*. 2014;123(25):3951-3962.
2. Zola H, Swart B, Nicholson I, et al. CD molecules 2005: human cell differentiation molecules. *Blood*. 2005;106(9):3123-3126.
3. Zola H, Swart B, Nicholson I, Voss E. Leukocyte and Stromal Cell Molecules: The CD Markers. in: Wiley-Liss. Hoboken, NJ, USA. 2007.
4. Chan CH, Blazar BR, Eide CR, Kreitman RJ, Valleria DA. A murine cytokine fusion toxin specifically targeting the murine granulocyte-macrophage colony-stimulating factor (GM-CSF) receptor on normal committed bone marrow progenitor cells and GM-CSF-dependent tumor cells. *Blood*. 1995;86(7):2732-2740.
5. Sadovnik I, Hoelbl-Kovacic A, Herrmann H, et al. Identification of CD25 as STAT5-Dependent Growth Regulator of Leukemic Stem Cells in Ph<sup>+</sup> CML. *Clin Cancer Res*. 2016;22(8):2051-2061.
6. Bennett JM, Catovsky D, Daniel MT, et al. Proposals for the classification of the acute leukaemias. French-American-British (FAB) co-operative group. *Br J Haematol*. 1976;33(4):451-458.
7. Bennett JM, Catovsky D, Daniel MT, et al. Proposed revised criteria for the classification of acute myeloid leukemia. A report of the French-American-British Cooperative Group. *Ann Intern Med*. 1985;103(4):620-625.
8. Arber DA, Brunning RD, Le Beau MM, et al. Acute Myeloid Leukaemia and Related Precursor Neoplasms. In: Swerdlow SH, Campo E, Harris NL, et al, eds. WHO Classification of Tumours of Haematopoietic and Lymphoid Tissues, 4th Edition. Lyon, France: IARC Press; 2008:109-148.
9. Arber DA, Orazi A, Hasserjian R, et al. The 2016 revision to the World Health Organization classification of myeloid neoplasms and acute leukemia. *Blood*. 2016;127(20):2391-2405.
10. Vardiman JW, Melo J, Baccarani M, Thiele J. Chronic myelogenous leukaemia, *BCR/ABL* positive. In: Swerdlow SH, Campo E, Harris NL, et al, eds. WHO Classification of Tumours of Haematopoietic and Lymphoid Tissues, 4th Edition. Lyon, France: IARC Press; 2008:32-37.
11. Bennett JM, Catovsky D, Daniel MT, et al. The chronic myeloid leukaemias: guidelines for distinguishing chronic granulocytic, atypical chronic myeloid, and

chronic myelomonocytic leukaemia. Proposals by the French-American-British Cooperative Leukaemia Group. *Br J Haematol.* 1994;87(4):746-754.

12. Baccarani M, Saglio G, Goldman J, et al. Evolving concepts in the management of chronic myeloid leukemia: recommendations from an expert panel on behalf of the European LeukemiaNet. *Blood.* 2006;108(6):1809-1820.

13. Baccarani M, Cortes J, Pane F, et al. Chronic myeloid leukemia: an update of concepts and management recommendations of European LeukemiaNet. *J Clin Oncol.* 2009;27(35):6041-6051.

14. Mayer RJ, Davis RB, Schiffer CA, et al. Intensive postremission chemotherapy in adults with acute myeloid leukemia. Cancer and Leukemia Group B. *N Engl J Med.* 1994;331(14):896-903.

15. Sperr WR, Piribauer M, Wimazal F, et al. A novel effective and safe consolidation for patients over 60 years with acute myeloid leukemia: intermediate dose cytarabine (2 x 1 g/m<sup>2</sup> on days 1, 3, and 5). *Clin Cancer Res.* 2004;10(12 Pt 1):3965-3971.

16. Schiller G, Gajewski J, Territo M, et al. Long-term outcome of high-dose cytarabine-based consolidation chemotherapy for adults with acute myelogenous leukemia. *Blood.* 1992;80(12):2977-2982.

17. Sierra J, Storer B, Hansen JA, et al. Unrelated donor marrow transplantation for acute myeloid leukemia: an update of the Seattle experience. *Bone Marrow Transplant.* 2000;26(4):397-404.

18. Greinix HT, Nachbaur D, Krieger O, et al. Factors affecting long-term outcome after allogeneic haematopoietic stem cell transplantation for acute myelogenous leukaemia: a retrospective study of 172 adult patients reported to the Austrian Stem Cell Transplantation Registry. *Br J Haematol.* 2002;117(4):914-923.

19. Cornelissen JJ, Blaise D., Hematopoietic stem cell transplantation for patients with AML in first complete remission. *Blood.* 2016;127(1):62-70.

20. Kassim AA, Savani BN. Hematopoietic stem cell transplantation for acute myeloid leukemia: A review. *Hematol Oncol Stem Cell Ther.* 2017;10(4):245-251.

21. Florian S, Sonneck K, Hauswirth AW, et al. Detection of molecular targets on the surface of CD34<sup>+</sup>/CD38<sup>-</sup> stem cells in various myeloid malignancies. *Leuk Lymphoma.* 2006;47(2):207-222.

22. Blatt K, Herrmann H, Hoermann G, et al. Identification of campath-1 (CD52) as novel drug target in neoplastic stem cells in 5q-patients with MDS and AML. *Clin Cancer Res.* 2014;20(13):3589-3602.



23. Gentleman RC, Carey VJ, Bates DM, et al. Bioconductor: open software development for computational biology and bioinformatics. *Genome Biol.* 2004;5(10):R80.
24. Bilban M, Haslinger P, Prast J, et al. Identification of novel trophoblast invasion-related genes: heme oxygenase-1 controls motility via peroxisome proliferator-activated receptor gamma. *Endocrinology.* 2009;150(2):1000-1013.
25. Astapova I, Lee LJ, Morales C, Tauber S, Bilban M, Hollenberg AN. The nuclear corepressor, NCoR, regulates thyroid hormone action in vivo. *Proc Natl Acad Sci U S A.* 2008;105(49):19544-19549.
26. Smyth GK: Linear models and empirical bayes methods for assessing differential expression in microarray experiments. *Stat Appl Genet Mol Biol.* 2004;3:Article3.
27. Peter B, Gleixner KV, Cerny-Reiterer S, et al. Polo-like kinase-1 as a novel target in neoplastic mast cells:demonstration of growth-inhibitory effects of small interfering RNA and thePolo-like kinase-1 targeting drug BI 2536. *Haematologica.* 2011;96(5):672-680.
28. Martinelli G, Iacobucci I, Soverini S, et al. Monitoring minimal residual disease and controlling drug resistance in chronic myeloid leukaemia patients in treatment with imatinib as a guide to clinical management. *Hematol Oncol.* 2006;24(4):196-204.
29. Hughes T, Deininger M, Hochhaus A, et al. Monitoring CML patients responding to treatment with tyrosine kinase inhibitors: review and recommendations for harmonizing current methodology for detecting BCR-ABL transcripts and kinase domain mutations and for expressing results. *Blood.* 2006;108(1):28-37.
30. Müller MC, Cross NC, Erben P, et al. Harmonization of molecular monitoring of CML therapy in Europe. *Leukemia.* 2009;23(11):1957-1963.
31. Brothman AR, Persons DL, Shaffer LG. Nomenclature evolution: Changes in the ISCN from the 2005 to the 2009 edition. *Cytogenet Genome Res.* 2009;127(1):1-4.
32. Benjamini Y, Hochberg Y. Controlling the false discovery rate: a practical and powerful approach to multiple testing. *Journal of the Royal Statistical Society Series B.* 1995;57(1):289–300.
33. R Core Team. R: A language and environment for statistical computing. R Foundation for Statistical Computing, Vienna, Austria. URL <https://www.R-project.org/>.
34. Stone RM, Manley PW, Larson RA, Capdeville R. Midostaurin: its odyssey from discovery to approval for treating acute myeloid leukemia and advanced systemic mastocytosis. *Blood Adv.* 2018;2(4):444-453. Erratum in: *Blood Adv.* 2018;2(7):787.

35. Mori M, Kaneko N, Ueno Y, et al. Gilteritinib, a FLT3/AXL inhibitor, shows antileukemic activity in mouse models of FLT3 mutated acute myeloid leukemia. *Invest New Drugs*. 2017;35(5):556-565.
36. Murphy JR, Bishai W, Williams D, et al. Genetic assembly and selective toxicity of diphtheria-toxin-related polypeptide hormone fusion proteins. *Biochem Soc Symp*. 1987;53:9-23.
37. Bernstein ID. Monoclonal antibodies to the myeloid stem cells: therapeutic implications of CMA-676, a humanized anti-CD33 antibody calicheamicin conjugate. *Leukemia*. 2000;14(3):474-475.
38. Frampton JE, Wagstaff AJ. Alemtuzumab. *Drugs*. 2003;63(12):1229-1246.
